# Supplementary material for: Genome-Wide siRNA Screen Identifies Complementary Signaling Pathways Involved in Listeria Infection and Reveals Different Actin Nucleation Mechanisms during Listeria Cell Invasion and Actin Comet Tail Formation
Source: PubMed Central journal article supplement — mBio. 2015 May 19;6(3):e00598-15. doi: 10.1128/mBio.00598-15 (PMC4442140; doi:10.1128/mbio.00598-15), 2015-05-19
Supplement: mbo003152330st1.pdf [file mbo003152330st1.pdf]

| GeneName | Infection index Z-score rG1 | Infection index Z-score rG2 | Average infection index Z-score | Cell number rG1 | Cell number rG2 | Average cell number |
|----------|-----------------------------|-----------------------------|---------------------------------|-----------------|-----------------|---------------------|
| PODXL    | -4,466917                   | NaN                         | <b>-4,466917</b>                | 1893            | NaN             | <b>1893</b>         |
| ACBD5    | -4,14855                    | NaN                         | <b>-4,14855</b>                 | 1869            | NaN             | <b>1869</b>         |
| C16orf61 | -3,018441                   | NaN                         | <b>-3,018441</b>                | 2092            | NaN             | <b>2092</b>         |
| DPPA5    | -2,98703                    | NaN                         | <b>-2,98703</b>                 | 1923            | NaN             | <b>1923</b>         |
| LRRC3B   | -4,550912                   | -1,289988                   | <b>-2,92045</b>                 | 1999            | 1766            | <b>1882,5</b>       |
| GAB1     | -2,889945                   | NaN                         | <b>-2,889945</b>                | 1785            | NaN             | <b>1785</b>         |
| DNMT3B   | -2,746353                   | -3,024517                   | <b>-2,885435</b>                | 1488            | 1890            | <b>1689</b>         |
| ZDHHC5   | -2,860142                   | NaN                         | <b>-2,860142</b>                | 1571            | NaN             | <b>1571</b>         |
| C20orf46 | -2,856828                   | NaN                         | <b>-2,856828</b>                | 1449            | NaN             | <b>1449</b>         |
| CD2      | -2,012293                   | -3,650095                   | <b>-2,831194</b>                | 1744            | 2559            | <b>2151,5</b>       |
| CCDC106  | -2,815367                   | NaN                         | <b>-2,815367</b>                | 2039            | NaN             | <b>2039</b>         |
| FGD4     | -2,803468                   | NaN                         | <b>-2,803468</b>                | 1192            | NaN             | <b>1192</b>         |
| KLHL24   | -2,789692                   | NaN                         | <b>-2,789692</b>                | 1786            | NaN             | <b>1786</b>         |
| C8orf4   | -2,786107                   | NaN                         | <b>-2,786107</b>                | 1468            | NaN             | <b>1468</b>         |
| ADD3     | -3,079406                   | -2,412773                   | <b>-2,7460895</b>               | 1396            | 2778            | <b>2087</b>         |
| RGS14    | -2,74135                    | NaN                         | <b>-2,74135</b>                 | 1614            | NaN             | <b>1614</b>         |
| ACCN1    | -3,392112                   | -2,032747                   | <b>-2,7124295</b>               | 1855            | 2506            | <b>2180,5</b>       |
| MAPK15   | -1,178316                   | -4,238007                   | <b>-2,7081615</b>               | 2216            | 2244            | <b>2230</b>         |
| FAM111B  | -2,690198                   | NaN                         | <b>-2,690198</b>                | 2202            | NaN             | <b>2202</b>         |
| DCAF16   | -2,685418                   | NaN                         | <b>-2,685418</b>                | 1934            | NaN             | <b>1934</b>         |
| ATP7A    | NaN                         | -2,67138                    | <b>-2,67138</b>                 | NaN             | 2553            | <b>2553</b>         |
| DOCK5    | -2,662953                   | NaN                         | <b>-2,662953</b>                | 1943            | NaN             | <b>1943</b>         |
| FRAT2    | -2,640768                   | NaN                         | <b>-2,640768</b>                | 1704            | NaN             | <b>1704</b>         |
| CCDC54   | -2,618976                   | NaN                         | <b>-2,618976</b>                | 1547            | NaN             | <b>1547</b>         |
| CLEC17A  | -3,013378                   | -2,205856                   | <b>-2,609617</b>                | 1977            | 1966            | <b>1971,5</b>       |
| RBM45    | -2,606268                   | NaN                         | <b>-2,606268</b>                | 2018            | NaN             | <b>2018</b>         |
| KRTAP4-5 | -2,598338                   | NaN                         | <b>-2,598338</b>                | 731             | NaN             | <b>731</b>          |
| LETMD1   | -2,597744                   | NaN                         | <b>-2,597744</b>                | 1995            | NaN             | <b>1995</b>         |
| C19orf50 | -2,588675                   | NaN                         | <b>-2,588675</b>                | 1487            | NaN             | <b>1487</b>         |
| NLRP1    | -2,572198                   | NaN                         | <b>-2,572198</b>                | 1769            | NaN             | <b>1769</b>         |
| VASH2    | -2,564318                   | NaN                         | <b>-2,564318</b>                | 2099            | NaN             | <b>2099</b>         |
| SEPSECS  | -2,542559                   | NaN                         | <b>-2,542559</b>                | 2029            | NaN             | <b>2029</b>         |

|           |           |           |                   |      |      |               |
|-----------|-----------|-----------|-------------------|------|------|---------------|
| LRRC25    | -2,670708 | -2,316587 | <b>-2,4936475</b> | 1848 | 2781 | <b>2314,5</b> |
| CCDC8     | -2,491738 | NaN       | <b>-2,491738</b>  | 1463 | NaN  | <b>1463</b>   |
| ACTR3     | -3,179143 | -1,797813 | <b>-2,488478</b>  | 1618 | 2903 | <b>2260,5</b> |
| RBM14     | -2,644274 | -2,327072 | <b>-2,485673</b>  | 1714 | 1952 | <b>1833</b>   |
| EDIL3     | -2,482897 | NaN       | <b>-2,482897</b>  | 2274 | NaN  | <b>2274</b>   |
| OTUD6B    | -2,481693 | NaN       | <b>-2,481693</b>  | 1733 | NaN  | <b>1733</b>   |
| WDR78     | -2,445565 | NaN       | <b>-2,445565</b>  | 1940 | NaN  | <b>1940</b>   |
| HRASLS5   | -2,443683 | NaN       | <b>-2,443683</b>  | 1362 | NaN  | <b>1362</b>   |
| UTP14C    | -2,443052 | NaN       | <b>-2,443052</b>  | 2037 | NaN  | <b>2037</b>   |
| C20orf196 | -2,43521  | NaN       | <b>-2,43521</b>   | 1677 | NaN  | <b>1677</b>   |
| C6orf81   | -2,687377 | -2,161983 | <b>-2,42468</b>   | 1695 | 1762 | <b>1728,5</b> |
| GPR133    | -2,410048 | NaN       | <b>-2,410048</b>  | 1917 | NaN  | <b>1917</b>   |
| NCKAP1    | -2,409838 | NaN       | <b>-2,409838</b>  | 1926 | NaN  | <b>1926</b>   |
| BRD8      | -3,017042 | -1,796462 | <b>-2,406752</b>  | 1593 | 2495 | <b>2044</b>   |
| DEFA6     | -2,874806 | -1,894384 | <b>-2,384595</b>  | 1810 | 2111 | <b>1960,5</b> |
| SGCE      | -2,431057 | -2,337298 | <b>-2,3841775</b> | 1303 | 1640 | <b>1471,5</b> |
| EPB41L3   | -2,382637 | NaN       | <b>-2,382637</b>  | 1446 | NaN  | <b>1446</b>   |
| LGALS1    | -1,015708 | -3,713224 | <b>-2,364466</b>  | 1118 | 1805 | <b>1461,5</b> |
| ELK1      | -2,542552 | -2,15833  | <b>-2,350441</b>  | 1688 | 2259 | <b>1973,5</b> |
| TTN       | -3,204915 | -1,495631 | <b>-2,350273</b>  | 1600 | 1604 | <b>1602</b>   |
| LAPTM4B   | -2,995676 | -1,691756 | <b>-2,343716</b>  | 1953 | 1704 | <b>1828,5</b> |
| MAST4     | -2,301175 | -2,358112 | <b>-2,3296435</b> | 1821 | 2043 | <b>1932</b>   |
| SREBF1    | -2,192527 | -2,466637 | <b>-2,329582</b>  | 1513 | 2090 | <b>1801,5</b> |
| MRP63     | -2,768588 | -1,87776  | <b>-2,323174</b>  | 1792 | 2637 | <b>2214,5</b> |
| LAMA4     | -3,305577 | -1,337942 | <b>-2,3217595</b> | 2088 | 2538 | <b>2313</b>   |
| HSD11B1   | -2,245774 | -2,390652 | <b>-2,318213</b>  | 1346 | 1861 | <b>1603,5</b> |
| TRAM1     | -2,303592 | NaN       | <b>-2,303592</b>  | 1751 | NaN  | <b>1751</b>   |
| MXRA5     | -2,30055  | NaN       | <b>-2,30055</b>   | 1476 | NaN  | <b>1476</b>   |
| STON1     | -2,296114 | NaN       | <b>-2,296114</b>  | 1901 | NaN  | <b>1901</b>   |
| IQGAP2    | -2,236596 | -2,349893 | <b>-2,2932445</b> | 2397 | 2511 | <b>2454</b>   |
| TIMM8A    | -2,645829 | -1,931617 | <b>-2,288723</b>  | 897  | 1767 | <b>1332</b>   |
| DYNC2H1   | -2,286053 | NaN       | <b>-2,286053</b>  | 1676 | NaN  | <b>1676</b>   |
| CCL11     | -2,28379  | NaN       | <b>-2,28379</b>   | 1834 | NaN  | <b>1834</b>   |
| ARL15     | -2,282334 | NaN       | <b>-2,282334</b>  | 1894 | NaN  | <b>1894</b>   |

|          |           |           |                   |      |      |               |
|----------|-----------|-----------|-------------------|------|------|---------------|
| CADM2    | -2,439564 | -2,108157 | <b>-2,2738605</b> | 2111 | 2409 | <b>2260</b>   |
| NAB1     | -2,267557 | NaN       | <b>-2,267557</b>  | 1579 | NaN  | <b>1579</b>   |
| XKR3     | -2,535335 | -1,973905 | <b>-2,25462</b>   | 2068 | 2177 | <b>2122,5</b> |
| REG3G    | -2,252731 | NaN       | <b>-2,252731</b>  | 1676 | NaN  | <b>1676</b>   |
| KLHL18   | -2,249127 | NaN       | <b>-2,249127</b>  | 1544 | NaN  | <b>1544</b>   |
| SEC14L2  | -2,479712 | -2,012141 | <b>-2,2459265</b> | 2093 | 2422 | <b>2257,5</b> |
| IPCEF1   | -2,64863  | -1,842623 | <b>-2,2456265</b> | 1478 | 2080 | <b>1779</b>   |
| IL21     | -2,30113  | -2,187049 | <b>-2,2440895</b> | 1817 | 2605 | <b>2211</b>   |
| LIMCH1   | -2,238521 | NaN       | <b>-2,238521</b>  | 1338 | NaN  | <b>1338</b>   |
| DMRT2    | NaN       | -2,234981 | <b>-2,234981</b>  | NaN  | 2711 | <b>2711</b>   |
| OR5AN1   | -2,534887 | -1,917693 | <b>-2,22629</b>   | 1383 | 1862 | <b>1622,5</b> |
| TAOK2    | -2,071803 | -2,379856 | <b>-2,2258295</b> | 1645 | 1712 | <b>1678,5</b> |
| NUMBL    | -2,195947 | -2,254964 | <b>-2,2254555</b> | 2341 | 2168 | <b>2254,5</b> |
| MAN1A1   | -2,750975 | -1,699849 | <b>-2,225412</b>  | 2004 | 2654 | <b>2329</b>   |
| GRK1     | -2,218616 | NaN       | <b>-2,218616</b>  | 1810 | NaN  | <b>1810</b>   |
| C9orf85  | -2,217114 | NaN       | <b>-2,217114</b>  | 1774 | NaN  | <b>1774</b>   |
| POLD3    | -2,439104 | -1,989271 | <b>-2,2141875</b> | 1923 | 2462 | <b>2192,5</b> |
| SELO     | -2,211272 | NaN       | <b>-2,211272</b>  | 1613 | NaN  | <b>1613</b>   |
| PTPN12   | -2,641723 | -1,77873  | <b>-2,2102265</b> | 1759 | 2106 | <b>1932,5</b> |
| ZNF846   | -2,208295 | NaN       | <b>-2,208295</b>  | 1852 | NaN  | <b>1852</b>   |
| MON2     | -2,207243 | NaN       | <b>-2,207243</b>  | 1590 | NaN  | <b>1590</b>   |
| SNX6     | -2,699779 | -1,703778 | <b>-2,2017785</b> | 1340 | 1658 | <b>1499</b>   |
| WWTR1    | -2,370253 | -2,025692 | <b>-2,1979725</b> | 1571 | 2240 | <b>1905,5</b> |
| C12orf45 | -2,58618  | -1,808468 | <b>-2,197324</b>  | 1640 | 1904 | <b>1772</b>   |
| COL12A1  | -3,291694 | -1,101841 | <b>-2,1967675</b> | 1428 | 2011 | <b>1719,5</b> |
| MET      | -1,779179 | -2,608327 | <b>-2,193753</b>  | 1072 | 1973 | <b>1522,5</b> |
| RGS10    | -2,3959   | -1,985526 | <b>-2,190713</b>  | 1900 | 2225 | <b>2062,5</b> |
| CATSPERB | -3,060764 | -1,304801 | <b>-2,1827825</b> | 1769 | 2298 | <b>2033,5</b> |
| MAGEB4   | -2,17569  | NaN       | <b>-2,17569</b>   | 1821 | NaN  | <b>1821</b>   |
| AHNAK    | -2,172689 | NaN       | <b>-2,172689</b>  | 1348 | NaN  | <b>1348</b>   |
| SPRY3    | -2,168157 | NaN       | <b>-2,168157</b>  | 1805 | NaN  | <b>1805</b>   |
| FAM170A  | -2,231539 | -2,096068 | <b>-2,1638035</b> | 1650 | 2418 | <b>2034</b>   |
| SPTY2D1  | -2,163334 | NaN       | <b>-2,163334</b>  | 2002 | NaN  | <b>2002</b>   |
| NDUFAF4  | -2,162122 | NaN       | <b>-2,162122</b>  | 1931 | NaN  | <b>1931</b>   |

|           |           |           |                   |      |      |               |
|-----------|-----------|-----------|-------------------|------|------|---------------|
| HNRPD1    | -2,16133  | NaN       | <b>-2,16133</b>   | 1139 | NaN  | <b>1139</b>   |
| BCL2L10   | -2,529325 | -1,786408 | <b>-2,1578665</b> | 1888 | 2784 | <b>2336</b>   |
| GARNL3    | -2,360767 | -1,953569 | <b>-2,157168</b>  | 1794 | 1992 | <b>1893</b>   |
| CABIN1    | -2,531854 | -1,777082 | <b>-2,154468</b>  | 1552 | 2114 | <b>1833</b>   |
| VPS28     | -2,11473  | -2,193909 | <b>-2,1543195</b> | 1699 | 1937 | <b>1818</b>   |
| SPATA2    | -1,723916 | -2,583215 | <b>-2,1535655</b> | 1204 | 1394 | <b>1299</b>   |
| SUMF2     | -2,153068 | NaN       | <b>-2,153068</b>  | 1709 | NaN  | <b>1709</b>   |
| C17orf58  | -2,152685 | NaN       | <b>-2,152685</b>  | 1455 | NaN  | <b>1455</b>   |
| TMPRSS11B | -2,074269 | -2,225497 | <b>-2,149883</b>  | 1747 | 2332 | <b>2039,5</b> |
| MEI1      | -2,148223 | NaN       | <b>-2,148223</b>  | 2075 | NaN  | <b>2075</b>   |
| ZNF99     | -3,27853  | -1,010742 | <b>-2,144636</b>  | 1680 | 2033 | <b>1856,5</b> |
| GNA11     | -1,805271 | -2,479175 | <b>-2,142223</b>  | 1914 | 1984 | <b>1949</b>   |
| GARS      | -1,992909 | -2,285528 | <b>-2,1392185</b> | 1690 | 2483 | <b>2086,5</b> |
| ZNF17     | -3,109194 | -1,168595 | <b>-2,1388945</b> | 1491 | 1883 | <b>1687</b>   |
| TIGIT     | -2,12162  | NaN       | <b>-2,12162</b>   | 1600 | NaN  | <b>1600</b>   |
| AGGF1     | -2,121324 | NaN       | <b>-2,121324</b>  | 1886 | NaN  | <b>1886</b>   |
| C9orf142  | -2,115699 | NaN       | <b>-2,115699</b>  | 1895 | NaN  | <b>1895</b>   |
| EED       | -2,372972 | -1,857155 | <b>-2,1150635</b> | 1474 | 2109 | <b>1791,5</b> |
| DEFB126   | -2,788154 | -1,440716 | <b>-2,114435</b>  | 1281 | 1786 | <b>1533,5</b> |
| OR51T1    | -2,109671 | NaN       | <b>-2,109671</b>  | 513  | NaN  | <b>513</b>    |
| IFRD1     | -2,158496 | -2,057778 | <b>-2,108137</b>  | 1763 | 1970 | <b>1866,5</b> |
| SMPX      | -2,104345 | NaN       | <b>-2,104345</b>  | 1658 | NaN  | <b>1658</b>   |
| UTS2      | -2,997625 | -1,21076  | <b>-2,1041925</b> | 1802 | 2515 | <b>2158,5</b> |
| MRPL3     | -2,465938 | -1,733016 | <b>-2,099477</b>  | 1712 | 2471 | <b>2091,5</b> |
| TCEB1     | -2,229391 | -1,968929 | <b>-2,09916</b>   | 1350 | 2628 | <b>1989</b>   |
| VIPR1     | -2,098497 | NaN       | <b>-2,098497</b>  | 1641 | NaN  | <b>1641</b>   |
| ATL2      | -3,493809 | -0,702678 | <b>-2,0982435</b> | 1755 | 2777 | <b>2266</b>   |
| PSORS1C1  | -2,097438 | NaN       | <b>-2,097438</b>  | 1602 | NaN  | <b>1602</b>   |
| TCEAL1    | -2,35854  | -1,825056 | <b>-2,091798</b>  | 1874 | 2572 | <b>2223</b>   |
| ZNF18     | -2,501079 | -1,681674 | <b>-2,0913765</b> | 2341 | 2315 | <b>2328</b>   |
| ANKRD42   | -2,091211 | NaN       | <b>-2,091211</b>  | 1733 | NaN  | <b>1733</b>   |
| OR6C6     | -2,287719 | -1,893202 | <b>-2,0904605</b> | 2237 | 2337 | <b>2287</b>   |
| YWHAZ     | NaN       | -2,087326 | <b>-2,087326</b>  | NaN  | 2453 | <b>2453</b>   |
| DVL3      | -1,766205 | -2,406576 | <b>-2,0863905</b> | 1983 | 1772 | <b>1877,5</b> |

|           |           |           |                   |      |      |               |
|-----------|-----------|-----------|-------------------|------|------|---------------|
| FCGR2B    | -1,845106 | -2,312538 | <b>-2,078822</b>  | 1798 | 2558 | <b>2178</b>   |
| CCDC153   | -2,197933 | -1,959543 | <b>-2,078738</b>  | 1326 | 1363 | <b>1344,5</b> |
| C20orf111 | -2,077156 | NaN       | <b>-2,077156</b>  | 2074 | NaN  | <b>2074</b>   |
| SNX11     | -2,074966 | NaN       | <b>-2,074966</b>  | 1508 | NaN  | <b>1508</b>   |
| RRH       | -2,074909 | NaN       | <b>-2,074909</b>  | 1855 | NaN  | <b>1855</b>   |
| CES2      | -1,901383 | -2,245713 | <b>-2,073548</b>  | 1526 | 1798 | <b>1662</b>   |
| SLC7A5    | -1,541992 | -2,595876 | <b>-2,068934</b>  | 1578 | 2370 | <b>1974</b>   |
| PAX8      | -1,845187 | -2,276348 | <b>-2,0607675</b> | 1463 | 2019 | <b>1741</b>   |
| TM9SF2    | -2,241683 | -1,873137 | <b>-2,05741</b>   | 1461 | 1769 | <b>1615</b>   |
| ZSCAN22   | -2,057057 | NaN       | <b>-2,057057</b>  | 1089 | NaN  | <b>1089</b>   |
| DDX10     | -2,3164   | -1,790787 | <b>-2,0535935</b> | 1764 | 2156 | <b>1960</b>   |
| CTNNA2    | -1,555758 | -2,54616  | <b>-2,050959</b>  | 1542 | 1715 | <b>1628,5</b> |
| SDF4      | -2,043255 | NaN       | <b>-2,043255</b>  | 1324 | NaN  | <b>1324</b>   |
| GPR32     | -2,043043 | NaN       | <b>-2,043043</b>  | 1827 | NaN  | <b>1827</b>   |
| YSK4      | -2,191788 | -1,886116 | <b>-2,038952</b>  | 1713 | 2275 | <b>1994</b>   |
| ZG16      | -2,036529 | NaN       | <b>-2,036529</b>  | 1567 | NaN  | <b>1567</b>   |
| SPPL3     | -1,589945 | -2,477066 | <b>-2,0335055</b> | 1135 | 2059 | <b>1597</b>   |
| USE1      | -2,056372 | -2,01007  | <b>-2,033221</b>  | 950  | 1297 | <b>1123,5</b> |
| IGFBP3    | -2,239368 | -1,823322 | <b>-2,031345</b>  | 1268 | 2078 | <b>1673</b>   |
| C14orf39  | -2,030691 | NaN       | <b>-2,030691</b>  | 1907 | NaN  | <b>1907</b>   |
| SLC29A4   | -2,03029  | NaN       | <b>-2,03029</b>   | 1010 | NaN  | <b>1010</b>   |
| TCTN2     | -2,029834 | NaN       | <b>-2,029834</b>  | 1514 | NaN  | <b>1514</b>   |
| TLX3      | -2,029829 | NaN       | <b>-2,029829</b>  | 1707 | NaN  | <b>1707</b>   |
| ALDH7A1   | -2,843833 | -1,21375  | <b>-2,0287915</b> | 1866 | 2972 | <b>2419</b>   |
| MUM1L1    | -2,027968 | NaN       | <b>-2,027968</b>  | 1295 | NaN  | <b>1295</b>   |
| PABPC3    | -2,757984 | -1,296092 | <b>-2,027038</b>  | 1341 | 1910 | <b>1625,5</b> |
| CENPI     | -2,026901 | NaN       | <b>-2,026901</b>  | 1334 | NaN  | <b>1334</b>   |
| ABI1      | -2,252618 | -1,798278 | <b>-2,025448</b>  | 1008 | 1726 | <b>1367</b>   |
| ZPLD1     | -2,025344 | NaN       | <b>-2,025344</b>  | 1486 | NaN  | <b>1486</b>   |
| C1orf110  | -2,451803 | -1,594692 | <b>-2,0232475</b> | 1620 | 2253 | <b>1936,5</b> |
| PPIP5K2   | -1,968757 | -2,074735 | <b>-2,021746</b>  | 1956 | 2942 | <b>2449</b>   |
| TAS2R43   | -2,02164  | NaN       | <b>-2,02164</b>   | 1570 | NaN  | <b>1570</b>   |
| ZNF548    | -1,692538 | -2,350238 | <b>-2,021388</b>  | 1275 | 1862 | <b>1568,5</b> |
| CNTRL     | -1,539384 | -2,49556  | <b>-2,017472</b>  | 1832 | 2250 | <b>2041</b>   |

|           |           |           |                   |      |      |               |
|-----------|-----------|-----------|-------------------|------|------|---------------|
| OR5D16    | -2,013106 | NaN       | <b>-2,013106</b>  | 1279 | NaN  | <b>1279</b>   |
| C12orf65  | -2,01269  | NaN       | <b>-2,01269</b>   | 1393 | NaN  | <b>1393</b>   |
| DIRC2     | -2,011287 | NaN       | <b>-2,011287</b>  | 1815 | NaN  | <b>1815</b>   |
| CDK20     | -1,870009 | -2,14912  | <b>-2,0095645</b> | 1948 | 1986 | <b>1967</b>   |
| STIL      | -2,006696 | NaN       | <b>-2,006696</b>  | 1216 | NaN  | <b>1216</b>   |
| SLC7A11   | -3,019626 | -0,989764 | <b>-2,004695</b>  | 1449 | 2006 | <b>1727,5</b> |
| CD68      | -2,176925 | -1,830716 | <b>-2,0038205</b> | 1428 | 1764 | <b>1596</b>   |
| RPAP2     | -2,00209  | NaN       | <b>-2,00209</b>   | 559  | NaN  | <b>559</b>    |
| VSTM2A    | -2,321918 | -1,675913 | <b>-1,9989155</b> | 1858 | 2632 | <b>2245</b>   |
| RPL32     | -2,293662 | -1,698951 | <b>-1,9963065</b> | 1864 | 1676 | <b>1770</b>   |
| CDK6      | -2,811053 | -1,179242 | <b>-1,9951475</b> | 2087 | 2042 | <b>2064,5</b> |
| OPTC      | -2,665705 | -1,323419 | <b>-1,994562</b>  | 1736 | 2080 | <b>1908</b>   |
| GPC3      | -1,987209 | NaN       | <b>-1,987209</b>  | 1675 | NaN  | <b>1675</b>   |
| ARHGEF9   | -2,425489 | -1,548856 | <b>-1,9871725</b> | 1716 | 1067 | <b>1391,5</b> |
| PHEX      | -2,46355  | -1,510576 | <b>-1,987063</b>  | 1734 | 2246 | <b>1990</b>   |
| NFAT5     | -1,725415 | -2,231135 | <b>-1,978275</b>  | 1626 | 2252 | <b>1939</b>   |
| FAM69A    | -2,125182 | -1,826196 | <b>-1,975689</b>  | 1756 | 1939 | <b>1847,5</b> |
| PDLIM4    | -1,88227  | -2,066111 | <b>-1,9741905</b> | 1800 | 2225 | <b>2012,5</b> |
| OR1N1     | -3,05681  | -0,891201 | <b>-1,9740055</b> | 1606 | 2686 | <b>2146</b>   |
| TAMM41    | -2,555342 | -1,390807 | <b>-1,9730745</b> | 1635 | 2273 | <b>1954</b>   |
| C20orf201 | -0,812003 | -3,130668 | <b>-1,9713355</b> | 1599 | 1367 | <b>1483</b>   |
| ATP2B4    | -2,958721 | -0,979    | <b>-1,9688605</b> | 1956 | 2329 | <b>2142,5</b> |
| SLC38A7   | -2,483162 | -1,454211 | <b>-1,9686865</b> | 1896 | 1857 | <b>1876,5</b> |
| SLC16A5   | -1,931056 | -2,003599 | <b>-1,9673275</b> | 1506 | 1757 | <b>1631,5</b> |
| TRAPPC9   | -2,646828 | -1,286374 | <b>-1,966601</b>  | 1974 | 2254 | <b>2114</b>   |
| RASSF9    | -1,961468 | NaN       | <b>-1,961468</b>  | 1698 | NaN  | <b>1698</b>   |
| BHLHE22   | -2,471058 | -1,447681 | <b>-1,9593695</b> | 1456 | 1876 | <b>1666</b>   |
| GFRAL     | -1,929377 | -1,987234 | <b>-1,9583055</b> | 1675 | 1431 | <b>1553</b>   |
| CCL13     | -1,923216 | -1,992948 | <b>-1,958082</b>  | 1337 | 1368 | <b>1352,5</b> |
| GFRA2     | -2,573462 | -1,33989  | <b>-1,956676</b>  | 1699 | 1377 | <b>1538</b>   |
| DEPDC7    | -1,764039 | -2,147344 | <b>-1,9556915</b> | 1267 | 1626 | <b>1446,5</b> |
| RBM24     | -2,374827 | -1,534159 | <b>-1,954493</b>  | 1341 | 1503 | <b>1422</b>   |
| FLYWCH1   | -2,257004 | -1,650078 | <b>-1,953541</b>  | 1190 | 1663 | <b>1426,5</b> |
| RAB11FIP1 | -1,744247 | -2,159084 | <b>-1,9516655</b> | 2135 | 2389 | <b>2262</b>   |

|          |           |           |                   |      |      |               |
|----------|-----------|-----------|-------------------|------|------|---------------|
| TMEM128  | -1,949742 | NaN       | <b>-1,949742</b>  | 1611 | NaN  | <b>1611</b>   |
| MTHFD1   | -1,896242 | -1,99452  | <b>-1,945381</b>  | 1485 | 1822 | <b>1653,5</b> |
| OSTN     | -2,548701 | -1,341886 | <b>-1,9452935</b> | 1850 | 2821 | <b>2335,5</b> |
| ZNF117   | -1,987623 | -1,899147 | <b>-1,943385</b>  | 1642 | 2066 | <b>1854</b>   |
| CDYL     | -2,666486 | -1,218647 | <b>-1,9425665</b> | 1598 | 2081 | <b>1839,5</b> |
| TANK     | -2,121564 | -1,760189 | <b>-1,9408765</b> | 1877 | 2437 | <b>2157</b>   |
| CLCN2    | -1,907468 | -1,968445 | <b>-1,9379565</b> | 1989 | 2642 | <b>2315,5</b> |
| ZC3H4    | -1,937473 | NaN       | <b>-1,937473</b>  | 1169 | NaN  | <b>1169</b>   |
| ARPC2    | -2,709404 | -1,164748 | <b>-1,937076</b>  | 1822 | 3124 | <b>2473</b>   |
| SEMA3D   | -2,110602 | -1,761644 | <b>-1,936123</b>  | 1964 | 1475 | <b>1719,5</b> |
| CCNDBP1  | -2,168432 | -1,698524 | <b>-1,933478</b>  | 2006 | 2246 | <b>2126</b>   |
| CPSF2    | -2,513046 | -1,350605 | <b>-1,9318255</b> | 2038 | 1854 | <b>1946</b>   |
| C11orf54 | -1,930241 | NaN       | <b>-1,930241</b>  | 765  | NaN  | <b>765</b>    |
| HOXB13   | -2,285402 | -1,572243 | <b>-1,9288225</b> | 726  | 1722 | <b>1224</b>   |
| POLQ     | NaN       | -1,928569 | <b>-1,928569</b>  | NaN  | 2553 | <b>2553</b>   |
| FAM168A  | -1,37587  | -2,477428 | <b>-1,926649</b>  | 1943 | 1467 | <b>1705</b>   |
| GPR34    | -1,922648 | NaN       | <b>-1,922648</b>  | 1144 | NaN  | <b>1144</b>   |
| ADAMTS6  | -2,725573 | -1,119609 | <b>-1,922591</b>  | 1718 | 2122 | <b>1920</b>   |
| TOR1AIP1 | -2,119777 | -1,72516  | <b>-1,9224685</b> | 1773 | 2371 | <b>2072</b>   |
| GNA13    | -1,837744 | -1,997257 | <b>-1,9175005</b> | 1550 | 2325 | <b>1937,5</b> |
| STX7     | -1,974241 | -1,86064  | <b>-1,9174405</b> | 2158 | 1989 | <b>2073,5</b> |
| LILRB2   | -2,553641 | -1,27053  | <b>-1,9120855</b> | 1844 | 2280 | <b>2062</b>   |
| HNMT     | -2,025918 | -1,790796 | <b>-1,908357</b>  | 1569 | 1797 | <b>1683</b>   |
| MRGPRD   | -1,905003 | NaN       | <b>-1,905003</b>  | 1675 | NaN  | <b>1675</b>   |
| CFL2     | -1,904767 | NaN       | <b>-1,904767</b>  | 1396 | NaN  | <b>1396</b>   |
| SAT2     | -0,807645 | -3,001432 | <b>-1,9045385</b> | 1477 | 1891 | <b>1684</b>   |
| CEP290   | -1,904014 | NaN       | <b>-1,904014</b>  | 2134 | NaN  | <b>2134</b>   |
| WDR62    | -1,902719 | NaN       | <b>-1,902719</b>  | 1916 | NaN  | <b>1916</b>   |
| RNF122   | -2,106477 | -1,69852  | <b>-1,9024985</b> | 1407 | 2545 | <b>1976</b>   |
| CLUL1    | -1,811848 | -1,992852 | <b>-1,90235</b>   | 1463 | 1971 | <b>1717</b>   |
| CCDC23   | -1,901355 | NaN       | <b>-1,901355</b>  | 1624 | NaN  | <b>1624</b>   |
| ROCK1    | -1,696396 | -2,106011 | <b>-1,9012035</b> | 1675 | 2053 | <b>1864</b>   |
| MC4R     | -1,899977 | NaN       | <b>-1,899977</b>  | 1886 | NaN  | <b>1886</b>   |
| LRRC45   | -1,898326 | NaN       | <b>-1,898326</b>  | 1282 | NaN  | <b>1282</b>   |

|          |           |           |                   |      |      |               |
|----------|-----------|-----------|-------------------|------|------|---------------|
| SLK      | -2,687913 | -1,106622 | <b>-1,8972675</b> | 1804 | 2167 | <b>1985,5</b> |
| CLINT1   | -2,410587 | -1,381317 | <b>-1,895952</b>  | 1768 | 2703 | <b>2235,5</b> |
| TIMM9    | -1,604932 | -2,182435 | <b>-1,8936835</b> | 1868 | 2106 | <b>1987</b>   |
| ZC3HAV1L | -1,892318 | NaN       | <b>-1,892318</b>  | 1473 | NaN  | <b>1473</b>   |
| TBCA     | -1,889018 | NaN       | <b>-1,889018</b>  | 1915 | NaN  | <b>1915</b>   |
| OR5B3    | -2,106048 | -1,667204 | <b>-1,886626</b>  | 1969 | 2401 | <b>2185</b>   |
| SH3PXD2A | -1,448416 | -2,323215 | <b>-1,8858155</b> | 1544 | 1674 | <b>1609</b>   |
| VNN3     | -2,131464 | -1,621677 | <b>-1,8765705</b> | 1628 | 1778 | <b>1703</b>   |
| PAN2     | -1,831429 | -1,918113 | <b>-1,874771</b>  | 1256 | 2034 | <b>1645</b>   |
| ZNF254   | -2,352582 | -1,394867 | <b>-1,8737245</b> | 1481 | 1809 | <b>1645</b>   |
| CCDC71   | -1,8735   | NaN       | <b>-1,8735</b>    | 1091 | NaN  | <b>1091</b>   |
| GJB7     | -1,873054 | NaN       | <b>-1,873054</b>  | 1476 | NaN  | <b>1476</b>   |
| PRKACG   | -1,951869 | -1,792434 | <b>-1,8721515</b> | 1675 | 1277 | <b>1476</b>   |
| NPC2     | -1,868295 | NaN       | <b>-1,868295</b>  | 1803 | NaN  | <b>1803</b>   |
| ZNF442   | -1,868175 | NaN       | <b>-1,868175</b>  | 1026 | NaN  | <b>1026</b>   |
| PROK1    | -1,928822 | -1,807133 | <b>-1,8679775</b> | 1604 | 2138 | <b>1871</b>   |
| RNF167   | -2,159472 | -1,574921 | <b>-1,8671965</b> | 1852 | 1915 | <b>1883,5</b> |
| CD83     | -2,289493 | -1,442178 | <b>-1,8658355</b> | 2049 | 2174 | <b>2111,5</b> |
| RAPSN    | -1,748743 | -1,978302 | <b>-1,8635225</b> | 1781 | 2436 | <b>2108,5</b> |
| SYT8     | -1,863067 | NaN       | <b>-1,863067</b>  | 1943 | NaN  | <b>1943</b>   |
| IL7      | -1,977023 | -1,749038 | <b>-1,8630305</b> | 1448 | 2303 | <b>1875,5</b> |
| FAM122B  | -1,743177 | -1,982045 | <b>-1,862611</b>  | 1419 | 1926 | <b>1672,5</b> |
| CYB5R1   | -1,79236  | -1,930814 | <b>-1,861587</b>  | 798  | 805  | <b>801,5</b>  |
| SYT17    | -1,861133 | NaN       | <b>-1,861133</b>  | 1449 | NaN  | <b>1449</b>   |
| SEMA5B   | -1,859949 | NaN       | <b>-1,859949</b>  | 1426 | NaN  | <b>1426</b>   |
| OR10A5   | -1,859857 | NaN       | <b>-1,859857</b>  | 706  | NaN  | <b>706</b>    |
| ZFPM1    | -1,025205 | -2,69377  | <b>-1,8594875</b> | 1790 | 1840 | <b>1815</b>   |
| TRPM2    | -2,125004 | -1,590847 | <b>-1,8579255</b> | 1874 | 2339 | <b>2106,5</b> |
| ATP6V1C1 | -1,725468 | -1,989482 | <b>-1,857475</b>  | 1163 | 1500 | <b>1331,5</b> |
| PRMT5    | -1,934048 | -1,778932 | <b>-1,85649</b>   | 1541 | 2319 | <b>1930</b>   |
| PRSS38   | -1,941878 | -1,77046  | <b>-1,856169</b>  | 1861 | 2210 | <b>2035,5</b> |
| FCGRT    | -1,59007  | -2,121051 | <b>-1,8555605</b> | 2035 | 2374 | <b>2204,5</b> |
| ZNF599   | -2,128605 | -1,575607 | <b>-1,852106</b>  | 1359 | 1949 | <b>1654</b>   |
| KLLN     | -1,783882 | -1,917794 | <b>-1,850838</b>  | 1462 | 1413 | <b>1437,5</b> |



|           |           |           |                   |      |      |               |
|-----------|-----------|-----------|-------------------|------|------|---------------|
| KLRC2     | -2,050991 | -1,649169 | <b>-1,85008</b>   | 1617 | 2056 | <b>1836,5</b> |
| ADIPOR1   | -1,615183 | -2,081245 | <b>-1,848214</b>  | 1295 | 1917 | <b>1606</b>   |
| ARAP1     | -0,813664 | -2,88114  | <b>-1,847402</b>  | 1743 | 3230 | <b>2486,5</b> |
| ADPRHL2   | -1,534463 | -2,159638 | <b>-1,8470505</b> | 1882 | 1829 | <b>1855,5</b> |
| ABHD14B   | NaN       | -1,846453 | <b>-1,846453</b>  | NaN  | 2442 | <b>2442</b>   |
| LARP1     | -1,64468  | -2,047944 | <b>-1,846312</b>  | 1811 | 2838 | <b>2324,5</b> |
| C2orf68   | -1,81579  | -1,874276 | <b>-1,845033</b>  | 1567 | 1928 | <b>1747,5</b> |
| LINC00174 | -1,843944 | NaN       | <b>-1,843944</b>  | 1373 | NaN  | <b>1373</b>   |
| CHPT1     | -2,291099 | -1,39426  | <b>-1,8426795</b> | 1960 | 2393 | <b>2176,5</b> |
| TSR2      | -2,147333 | -1,530606 | <b>-1,8389695</b> | 1622 | 2405 | <b>2013,5</b> |
| BTBD17    | -1,836714 | NaN       | <b>-1,836714</b>  | 1602 | NaN  | <b>1602</b>   |
| ZNF93     | -2,235184 | -1,435809 | <b>-1,8354965</b> | 1815 | 3204 | <b>2509,5</b> |
| SLC25A24  | -2,045345 | -1,625438 | <b>-1,8353915</b> | 1832 | 2573 | <b>2202,5</b> |
| COG7      | -1,834846 | NaN       | <b>-1,834846</b>  | 998  | NaN  | <b>998</b>    |
| FAM181B   | -1,85694  | -1,810274 | <b>-1,833607</b>  | 1397 | 1807 | <b>1602</b>   |
| ATAT1     | -3,095357 | -0,571075 | <b>-1,833216</b>  | 1634 | 2026 | <b>1830</b>   |
| C1orf95   | -1,958578 | -1,690989 | <b>-1,8247835</b> | 1549 | 2083 | <b>1816</b>   |
| CPA3      | -2,110452 | -1,537903 | <b>-1,8241775</b> | 2001 | 2320 | <b>2160,5</b> |
| FOXP2     | -2,416245 | -1,231993 | <b>-1,824119</b>  | 2235 | 2473 | <b>2354</b>   |
| MTMR3     | -1,831903 | -1,815867 | <b>-1,823885</b>  | 2036 | 2363 | <b>2199,5</b> |
| MRFAP1    | -2,071884 | -1,570062 | <b>-1,820973</b>  | 1708 | 1990 | <b>1849</b>   |
| SIGMAR1   | -1,820517 | NaN       | <b>-1,820517</b>  | 581  | NaN  | <b>581</b>    |
| WT1-AS    | -1,820208 | NaN       | <b>-1,820208</b>  | 1700 | NaN  | <b>1700</b>   |
| NEK7      | -1,549244 | -2,091159 | <b>-1,8202015</b> | 1171 | 2536 | <b>1853,5</b> |
| CDK15     | -1,923717 | -1,713209 | <b>-1,818463</b>  | 1453 | 1877 | <b>1665</b>   |
| SKAP2     | -1,81843  | NaN       | <b>-1,81843</b>   | 1732 | NaN  | <b>1732</b>   |
| UNC13D    | -1,390603 | -2,245629 | <b>-1,818116</b>  | 1582 | 2120 | <b>1851</b>   |
| RASA1     | -1,65434  | -1,981499 | <b>-1,8179195</b> | 1389 | 1527 | <b>1458</b>   |
| C20orf118 | -1,856152 | -1,777543 | <b>-1,8168475</b> | 1655 | 1456 | <b>1555,5</b> |
| 06-mars   | -1,960111 | -1,667651 | <b>-1,813881</b>  | 2000 | 2638 | <b>2319</b>   |
| DPP7      | -2,177615 | -1,448744 | <b>-1,8131795</b> | 2043 | 2445 | <b>2244</b>   |
| LRTM1     | -1,466523 | -2,158027 | <b>-1,812275</b>  | 1569 | 1943 | <b>1756</b>   |
| PRRX2     | -2,128859 | -1,489819 | <b>-1,809339</b>  | 1587 | 2428 | <b>2007,5</b> |
| SCNN1D    | -1,782603 | -1,835712 | <b>-1,8091575</b> | 1760 | 2200 | <b>1980</b>   |

|          |           |           |                   |      |      |               |
|----------|-----------|-----------|-------------------|------|------|---------------|
| ATXN1    | -1,806912 | NaN       | <b>-1,806912</b>  | 1745 | NaN  | <b>1745</b>   |
| PPY      | -2,365043 | -1,248058 | <b>-1,8065505</b> | 1446 | 1996 | <b>1721</b>   |
| SMPDL3A  | -1,942617 | -1,670246 | <b>-1,8064315</b> | 1953 | 2182 | <b>2067,5</b> |
| TES      | -2,045303 | -1,564263 | <b>-1,804783</b>  | 741  | 1114 | <b>927,5</b>  |
| MTUS2    | -1,803074 | NaN       | <b>-1,803074</b>  | 1164 | NaN  | <b>1164</b>   |
| GATM     | -1,948975 | -1,652461 | <b>-1,800718</b>  | 1159 | 1329 | <b>1244</b>   |
| TMEM22   | -2,002754 | -1,596139 | <b>-1,7994465</b> | 1284 | 1876 | <b>1580</b>   |
| OCIAD1   | -1,796861 | NaN       | <b>-1,796861</b>  | 1788 | NaN  | <b>1788</b>   |
| DCTD     | -1,742721 | -1,849905 | <b>-1,796313</b>  | 1508 | 2134 | <b>1821</b>   |
| NPBWR1   | -1,794894 | NaN       | <b>-1,794894</b>  | 1784 | NaN  | <b>1784</b>   |
| IRF7     | -1,30463  | -2,281226 | <b>-1,792928</b>  | 1397 | 2163 | <b>1780</b>   |
| LDB1     | -2,022731 | -1,557246 | <b>-1,7899885</b> | 1798 | 1992 | <b>1895</b>   |
| SPOCK1   | -2,09685  | -1,482798 | <b>-1,789824</b>  | 1811 | 2611 | <b>2211</b>   |
| PATE2    | -1,789784 | NaN       | <b>-1,789784</b>  | 1597 | NaN  | <b>1597</b>   |
| IGFBP5   | -1,788543 | NaN       | <b>-1,788543</b>  | 1889 | NaN  | <b>1889</b>   |
| NR2C2AP  | -2,00044  | -1,576556 | <b>-1,788498</b>  | 1304 | 1645 | <b>1474,5</b> |
| ZNF721   | -1,982586 | -1,591172 | <b>-1,786879</b>  | 1903 | 3211 | <b>2557</b>   |
| RPS6KC1  | -1,691572 | -1,882007 | <b>-1,7867895</b> | 1437 | 2222 | <b>1829,5</b> |
| KEAP1    | -1,786174 | NaN       | <b>-1,786174</b>  | 2006 | NaN  | <b>2006</b>   |
| CUL3     | -1,799803 | -1,768001 | <b>-1,783902</b>  | 1899 | 2547 | <b>2223</b>   |
| EPC2     | -1,478716 | -2,087585 | <b>-1,7831505</b> | 1570 | 1710 | <b>1640</b>   |
| C6orf154 | -2,074694 | -1,48734  | <b>-1,781017</b>  | 1610 | 1857 | <b>1733,5</b> |
| ANO1     | -2,230889 | -1,33018  | <b>-1,7805345</b> | 1541 | 1741 | <b>1641</b>   |
| CYFIP1   | -1,321037 | -2,235964 | <b>-1,7785005</b> | 1191 | 2323 | <b>1757</b>   |
| C16orf72 | -1,777546 | NaN       | <b>-1,777546</b>  | 2043 | NaN  | <b>2043</b>   |
| HBD      | -2,041748 | -1,511263 | <b>-1,7765055</b> | 1652 | 1708 | <b>1680</b>   |
| C18orf45 | -1,775603 | NaN       | <b>-1,775603</b>  | 1331 | NaN  | <b>1331</b>   |
| SUPT5H   | -0,956251 | -2,594122 | <b>-1,7751865</b> | 1060 | 1552 | <b>1306</b>   |
| SMCP     | -2,432905 | -1,117409 | <b>-1,775157</b>  | 162  | 1026 | <b>594</b>    |
| HSPB8    | -1,799764 | -1,749035 | <b>-1,7743995</b> | 1938 | 2162 | <b>2050</b>   |
| MYCBP2   | -1,870845 | -1,677893 | <b>-1,774369</b>  | 1763 | 2807 | <b>2285</b>   |
| CLIC3    | -1,990902 | -1,557476 | <b>-1,774189</b>  | 1964 | 2675 | <b>2319,5</b> |
| KLRG2    | -1,772623 | NaN       | <b>-1,772623</b>  | 1605 | NaN  | <b>1605</b>   |
| PER1     | -2,056413 | -1,488476 | <b>-1,7724445</b> | 1958 | 2263 | <b>2110,5</b> |

|          |           |           |                   |      |      |               |
|----------|-----------|-----------|-------------------|------|------|---------------|
| DNAJC18  | -1,652484 | -1,889211 | <b>-1,7708475</b> | 1387 | 1930 | <b>1658,5</b> |
| PROSC    | -1,979244 | -1,561399 | <b>-1,7703215</b> | 1745 | 1939 | <b>1842</b>   |
| SLC39A2  | -1,823653 | -1,714394 | <b>-1,7690235</b> | 1516 | 1605 | <b>1560,5</b> |
| DPEP1    | -1,593071 | -1,941784 | <b>-1,7674275</b> | 1194 | 2188 | <b>1691</b>   |
| SRD5A3   | NaN       | -1,767425 | <b>-1,767425</b>  | NaN  | 2556 | <b>2556</b>   |
| KCNS2    | -2,088757 | -1,444102 | <b>-1,7664295</b> | 1199 | 1869 | <b>1534</b>   |
| CDH19    | -1,462928 | -2,069083 | <b>-1,7660055</b> | 1214 | 1845 | <b>1529,5</b> |
| FAM122C  | -1,765587 | NaN       | <b>-1,765587</b>  | 1278 | NaN  | <b>1278</b>   |
| NR0B2    | -1,126646 | -2,398664 | <b>-1,762655</b>  | 1175 | 2182 | <b>1678,5</b> |
| ASB8     | -2,347845 | -1,175148 | <b>-1,7614965</b> | 1888 | 2664 | <b>2276</b>   |
| C9orf96  | -1,729301 | -1,791633 | <b>-1,760467</b>  | 1405 | 1858 | <b>1631,5</b> |
| PCDHA2   | -2,673007 | -0,846278 | <b>-1,7596425</b> | 1756 | 2272 | <b>2014</b>   |
| ZC3H7B   | -1,82632  | -1,691698 | <b>-1,759009</b>  | 1444 | 1869 | <b>1656,5</b> |
| PTPRT    | -1,258285 | -2,257874 | <b>-1,7580795</b> | 1950 | 2192 | <b>2071</b>   |
| C2orf57  | -2,222775 | -1,290902 | <b>-1,7568385</b> | 1646 | 1683 | <b>1664,5</b> |
| NMNAT1   | -1,56972  | -1,940661 | <b>-1,7551905</b> | 1466 | 1592 | <b>1529</b>   |
| TAP2     | -3,113477 | -0,396221 | <b>-1,754849</b>  | 1829 | 2668 | <b>2248,5</b> |
| ATP5O    | NaN       | -1,753503 | <b>-1,753503</b>  | NaN  | 2634 | <b>2634</b>   |
| ITPK1    | -1,160522 | -2,3463   | <b>-1,753411</b>  | 1407 | 1909 | <b>1658</b>   |
| ATP6V0E2 | -1,744206 | -1,761309 | <b>-1,7527575</b> | 1734 | 1903 | <b>1818,5</b> |
| C10orf57 | -1,387421 | -2,117457 | <b>-1,752439</b>  | 1515 | 1638 | <b>1576,5</b> |
| SCFD2    | -1,752436 | NaN       | <b>-1,752436</b>  | 1677 | NaN  | <b>1677</b>   |
| GOPC     | NaN       | -1,751062 | <b>-1,751062</b>  | NaN  | 2892 | <b>2892</b>   |
| ACTRT2   | -1,750602 | NaN       | <b>-1,750602</b>  | 1802 | NaN  | <b>1802</b>   |
| ARPP21   | -1,749962 | NaN       | <b>-1,749962</b>  | 1355 | NaN  | <b>1355</b>   |
| PLXND1   | -2,228389 | -1,271156 | <b>-1,7497725</b> | 1593 | 1897 | <b>1745</b>   |
| HAPLN2   | -1,751717 | -1,746961 | <b>-1,749339</b>  | 1687 | 1932 | <b>1809,5</b> |
| ADAM9    | -1,877711 | -1,6206   | <b>-1,7491555</b> | 1819 | 2078 | <b>1948,5</b> |
| C20orf94 | -2,026242 | -1,471749 | <b>-1,7489955</b> | 1263 | 1660 | <b>1461,5</b> |
| EDC3     | -1,747528 | NaN       | <b>-1,747528</b>  | 1517 | NaN  | <b>1517</b>   |
| ZNF219   | -1,530929 | -1,962888 | <b>-1,7469085</b> | 1108 | 1459 | <b>1283,5</b> |
| ARHGAP5  | -1,64766  | -1,845308 | <b>-1,746484</b>  | 1599 | 2098 | <b>1848,5</b> |
| NKX2-3   | -1,947662 | -1,544919 | <b>-1,7462905</b> | 1591 | 1916 | <b>1753,5</b> |
| DIS3L    | -1,745157 | NaN       | <b>-1,745157</b>  | 1751 | NaN  | <b>1751</b>   |

|         |           |           |                   |      |      |               |
|---------|-----------|-----------|-------------------|------|------|---------------|
| OR11H6  | -2,555798 | -0,932428 | <b>-1,744113</b>  | 1504 | 2173 | <b>1838,5</b> |
| GSTCD   | -1,742585 | NaN       | <b>-1,742585</b>  | 1549 | NaN  | <b>1549</b>   |
| MUTYH   | NaN       | -1,742556 | <b>-1,742556</b>  | NaN  | 2067 | <b>2067</b>   |
| ATPBD4  | -1,816554 | -1,666381 | <b>-1,7414675</b> | 1535 | 2319 | <b>1927</b>   |
| RELT    | NaN       | -1,741332 | <b>-1,741332</b>  | NaN  | 1997 | <b>1997</b>   |
| ADAM33  | -2,460582 | -1,019471 | <b>-1,7400265</b> | 2019 | 2231 | <b>2125</b>   |
| DNM1    | -2,270266 | -1,20932  | <b>-1,739793</b>  | 1518 | 1873 | <b>1695,5</b> |
| DEPDC1B | -1,739621 | NaN       | <b>-1,739621</b>  | 1709 | NaN  | <b>1709</b>   |
| NLGN4X  | -1,561446 | -1,917244 | <b>-1,739345</b>  | 1188 | 1506 | <b>1347</b>   |
| SLC23A2 | -1,831219 | -1,645229 | <b>-1,738224</b>  | 1200 | 1619 | <b>1409,5</b> |
| HSBP1   | -1,665481 | -1,808063 | <b>-1,736772</b>  | 1530 | 1954 | <b>1742</b>   |
| LCE5A   | -1,891447 | -1,579585 | <b>-1,735516</b>  | 1350 | 2025 | <b>1687,5</b> |
| FOXH1   | -1,894187 | -1,576655 | <b>-1,735421</b>  | 1735 | 2006 | <b>1870,5</b> |
| CHST3   | -1,769817 | -1,701001 | <b>-1,735409</b>  | 1356 | 1964 | <b>1660</b>   |
| NAT8L   | -1,167727 | -2,302094 | <b>-1,7349105</b> | 1465 | 2094 | <b>1779,5</b> |
| PYHIN1  | -1,723021 | -1,746719 | <b>-1,73487</b>   | 1414 | 2829 | <b>2121,5</b> |
| AIM2    | -2,218536 | -1,250564 | <b>-1,73455</b>   | 2058 | 2743 | <b>2400,5</b> |
| COPB2   | -1,388727 | -2,079984 | <b>-1,7343555</b> | 827  | 778  | <b>802,5</b>  |
| BRD3    | -2,02387  | -1,442808 | <b>-1,733339</b>  | 2279 | 2491 | <b>2385</b>   |
| PTPN9   | -2,347603 | -1,118533 | <b>-1,733068</b>  | 1553 | 1978 | <b>1765,5</b> |
| ACAN    | -1,732229 | NaN       | <b>-1,732229</b>  | 1623 | NaN  | <b>1623</b>   |
| TMEM54  | -1,431482 | -2,031322 | <b>-1,731402</b>  | 1347 | 1779 | <b>1563</b>   |
| AP1G1   | -1,731054 | NaN       | <b>-1,731054</b>  | 1725 | NaN  | <b>1725</b>   |
| HMGNA4  | -1,855506 | -1,605599 | <b>-1,7305525</b> | 1674 | 1943 | <b>1808,5</b> |
| NCR1    | -1,788983 | -1,669685 | <b>-1,729334</b>  | 1401 | 2539 | <b>1970</b>   |
| CSRP2   | -1,728705 | NaN       | <b>-1,728705</b>  | 1309 | NaN  | <b>1309</b>   |
| TBL1XR1 | -1,728523 | NaN       | <b>-1,728523</b>  | 1741 | NaN  | <b>1741</b>   |
| PLEKHH1 | -1,72744  | NaN       | <b>-1,72744</b>   | 1862 | NaN  | <b>1862</b>   |
| ELAVL3  | -1,727257 | NaN       | <b>-1,727257</b>  | 1782 | NaN  | <b>1782</b>   |
| SWAP70  | -1,726816 | NaN       | <b>-1,726816</b>  | 1850 | NaN  | <b>1850</b>   |
| ANAPC7  | -2,910543 | -0,542265 | <b>-1,726404</b>  | 1664 | 2005 | <b>1834,5</b> |
| RFC5    | -2,007865 | -1,444177 | <b>-1,726021</b>  | 1890 | 1462 | <b>1676</b>   |
| SPEN    | -1,322065 | -2,129666 | <b>-1,7258655</b> | 1639 | 2033 | <b>1836</b>   |
| ATE1    | -2,690719 | -0,760883 | <b>-1,725801</b>  | 1256 | 2100 | <b>1678</b>   |

|          |           |           |                   |      |      |               |
|----------|-----------|-----------|-------------------|------|------|---------------|
| PGAP3    | -1,663976 | -1,785264 | <b>-1,72462</b>   | 1299 | 1683 | <b>1491</b>   |
| MBD3L1   | -2,445    | -1,000887 | <b>-1,7229435</b> | 1781 | 2003 | <b>1892</b>   |
| NOL10    | -1,72118  | NaN       | <b>-1,72118</b>   | 1566 | NaN  | <b>1566</b>   |
| FUCA1    | -1,940943 | -1,496771 | <b>-1,718857</b>  | 2210 | 3317 | <b>2763,5</b> |
| MARVELD2 | -1,690269 | -1,747161 | <b>-1,718715</b>  | 1564 | 1638 | <b>1601</b>   |
| RASSF1   | -1,414321 | -2,021674 | <b>-1,7179975</b> | 986  | 1410 | <b>1198</b>   |
| TUFT1    | -1,578569 | -1,857147 | <b>-1,717858</b>  | 1352 | 2128 | <b>1740</b>   |
| CROT     | -1,256329 | -2,176395 | <b>-1,716362</b>  | 1308 | 1832 | <b>1570</b>   |
| RAD51C   | -1,434915 | -1,992987 | <b>-1,713951</b>  | 1665 | 1919 | <b>1792</b>   |
| CBLN4    | -1,713879 | NaN       | <b>-1,713879</b>  | 1993 | NaN  | <b>1993</b>   |
| CPNE8    | -1,707571 | -1,715839 | <b>-1,711705</b>  | 1937 | 2063 | <b>2000</b>   |
| CELSR2   | -1,711038 | NaN       | <b>-1,711038</b>  | 1605 | NaN  | <b>1605</b>   |
| EFNA3    | -1,616409 | -1,802616 | <b>-1,7095125</b> | 1541 | 1631 | <b>1586</b>   |
| MCHR1    | -1,970702 | -1,446272 | <b>-1,708487</b>  | 1489 | 2274 | <b>1881,5</b> |
| STARD4   | -0,985648 | -2,431112 | <b>-1,70838</b>   | 1929 | 2259 | <b>2094</b>   |
| ELOVL6   | -1,836897 | -1,577032 | <b>-1,7069645</b> | 1426 | 2293 | <b>1859,5</b> |
| LAMB4    | -1,795424 | -1,613883 | <b>-1,7046535</b> | 1348 | 1760 | <b>1554</b>   |
| TRPV2    | -1,563026 | -1,845014 | <b>-1,70402</b>   | 1294 | 1899 | <b>1596,5</b> |
| SOCS3    | -2,311674 | -1,09506  | <b>-1,703367</b>  | 1802 | 2687 | <b>2244,5</b> |
| EPHA2    | -1,339132 | -2,063237 | <b>-1,7011845</b> | 1642 | 2101 | <b>1871,5</b> |
| LAGE3    | -1,700884 | NaN       | <b>-1,700884</b>  | 1378 | NaN  | <b>1378</b>   |
| TYRP1    | -1,918457 | -1,482464 | <b>-1,7004605</b> | 1511 | 1803 | <b>1657</b>   |
| TACR1    | -1,699514 | NaN       | <b>-1,699514</b>  | 1377 | NaN  | <b>1377</b>   |
| OBFC1    | -2,143334 | -1,255198 | <b>-1,699266</b>  | 1568 | 2354 | <b>1961</b>   |
| VGLL1    | -1,981208 | -1,415068 | <b>-1,698138</b>  | 1049 | 1377 | <b>1213</b>   |
| RTP4     | -2,014033 | -1,379457 | <b>-1,696745</b>  | 1506 | 1868 | <b>1687</b>   |
| ZNF672   | -1,89936  | -1,489955 | <b>-1,6946575</b> | 1815 | 2207 | <b>2011</b>   |
| GPR172A  | -2,233925 | -1,152883 | <b>-1,693404</b>  | 1714 | 2740 | <b>2227</b>   |
| PRR22    | -2,914097 | -0,472474 | <b>-1,6932855</b> | 1825 | 1861 | <b>1843</b>   |
| TMEM14B  | -3,725659 | 0,341817  | <b>-1,691921</b>  | 2003 | 2384 | <b>2193,5</b> |
| SERGEF   | -1,381005 | -1,997847 | <b>-1,689426</b>  | 1095 | 1935 | <b>1515</b>   |
| NTNG2    | -1,717023 | -1,661372 | <b>-1,6891975</b> | 1635 | 2131 | <b>1883</b>   |
| FER1L6   | -1,686468 | NaN       | <b>-1,686468</b>  | 1588 | NaN  | <b>1588</b>   |
| TCTN1    | -1,499604 | -1,868358 | <b>-1,683981</b>  | 2254 | 3499 | <b>2876,5</b> |

|          |           |           |                   |      |      |               |
|----------|-----------|-----------|-------------------|------|------|---------------|
| CRYBA2   | -1,856259 | -1,511267 | <b>-1,683763</b>  | 1700 | 1975 | <b>1837,5</b> |
| MAGEC2   | -1,681638 | NaN       | <b>-1,681638</b>  | 1584 | NaN  | <b>1584</b>   |
| OR51B6   | -1,681256 | NaN       | <b>-1,681256</b>  | 1970 | NaN  | <b>1970</b>   |
| HRNR     | -1,681118 | NaN       | <b>-1,681118</b>  | 1787 | NaN  | <b>1787</b>   |
| PROM2    | -1,908916 | -1,453199 | <b>-1,6810575</b> | 1593 | 2219 | <b>1906</b>   |
| RAP1GAP2 | -1,564665 | -1,795702 | <b>-1,6801835</b> | 1895 | 2201 | <b>2048</b>   |
| SLC35C2  | -1,678684 | NaN       | <b>-1,678684</b>  | 586  | NaN  | <b>586</b>    |
| UNC119   | -1,135704 | -2,22065  | <b>-1,678177</b>  | 1904 | 2388 | <b>2146</b>   |
| L3MBTL1  | -2,016156 | -1,337893 | <b>-1,6770245</b> | 1891 | 2033 | <b>1962</b>   |
| KNCN     | -1,312759 | -2,039479 | <b>-1,676119</b>  | 1279 | 1887 | <b>1583</b>   |
| SAMD10   | -1,676099 | NaN       | <b>-1,676099</b>  | 1170 | NaN  | <b>1170</b>   |
| PIGL     | -1,487532 | -1,864134 | <b>-1,675833</b>  | 999  | 1444 | <b>1221,5</b> |
| KDELR3   | -2,234838 | -1,116504 | <b>-1,675671</b>  | 1574 | 2686 | <b>2130</b>   |
| PTPRH    | -1,381301 | -1,969779 | <b>-1,67554</b>   | 1263 | 2158 | <b>1710,5</b> |
| MRPS11   | -1,609656 | -1,740497 | <b>-1,6750765</b> | 666  | 1799 | <b>1232,5</b> |
| WFDC2    | -2,127505 | -1,22259  | <b>-1,6750475</b> | 1436 | 2046 | <b>1741</b>   |
| C11orf48 | -1,674586 | NaN       | <b>-1,674586</b>  | 1589 | NaN  | <b>1589</b>   |
| C19orf75 | -1,674529 | NaN       | <b>-1,674529</b>  | 953  | NaN  | <b>953</b>    |
| APOL3    | NaN       | -1,674402 | <b>-1,674402</b>  | NaN  | 1399 | <b>1399</b>   |
| TAP1     | -2,399866 | -0,945562 | <b>-1,672714</b>  | 1834 | 2328 | <b>2081</b>   |
| ESR1     | -1,851777 | -1,492721 | <b>-1,672249</b>  | 1236 | 1849 | <b>1542,5</b> |
| INSC     | -1,671535 | NaN       | <b>-1,671535</b>  | 1542 | NaN  | <b>1542</b>   |
| PRUNE2   | -1,671252 | NaN       | <b>-1,671252</b>  | 1821 | NaN  | <b>1821</b>   |
| TNFSF14  | -2,036886 | -1,305314 | <b>-1,6711</b>    | 1589 | 1945 | <b>1767</b>   |
| KRTAP5-9 | -1,814193 | -1,527111 | <b>-1,670652</b>  | 1521 | 1839 | <b>1680</b>   |
| CHD7     | -1,424085 | -1,916722 | <b>-1,6704035</b> | 1774 | 2484 | <b>2129</b>   |
| PCDHGB5  | -1,670153 | NaN       | <b>-1,670153</b>  | 1939 | NaN  | <b>1939</b>   |
| PRLH     | -1,788971 | -1,549718 | <b>-1,6693445</b> | 1370 | 1937 | <b>1653,5</b> |
| RANGAP1  | -1,848428 | -1,488352 | <b>-1,66839</b>   | 1642 | 2082 | <b>1862</b>   |
| MIP      | -2,222742 | -1,110077 | <b>-1,6664095</b> | 1717 | 1761 | <b>1739</b>   |
| MAGIX    | -1,178508 | -2,153693 | <b>-1,6661005</b> | 939  | 1477 | <b>1208</b>   |
| PAPL     | -1,289749 | -2,042098 | <b>-1,6659235</b> | 1242 | 2056 | <b>1649</b>   |
| LRGUK    | -1,433234 | -1,895669 | <b>-1,6644515</b> | 1500 | 2093 | <b>1796,5</b> |
| DUSP13   | -1,575316 | -1,752629 | <b>-1,6639725</b> | 1441 | 1949 | <b>1695</b>   |

|           |           |           |                   |      |      |               |
|-----------|-----------|-----------|-------------------|------|------|---------------|
| POM121L12 | -1,67159  | -1,654795 | <b>-1,6631925</b> | 1342 | 1954 | <b>1648</b>   |
| TMEM63A   | -1,965344 | -1,356624 | <b>-1,660984</b>  | 1619 | 2120 | <b>1869,5</b> |
| GPX5      | -1,751695 | -1,570243 | <b>-1,660969</b>  | 1456 | 2440 | <b>1948</b>   |
| MDK       | -1,809325 | -1,511233 | <b>-1,660279</b>  | 1361 | 2074 | <b>1717,5</b> |
| NCAPG     | -1,65947  | NaN       | <b>-1,65947</b>   | 1682 | NaN  | <b>1682</b>   |
| STAU1     | -1,658461 | NaN       | <b>-1,658461</b>  | 1161 | NaN  | <b>1161</b>   |
| ADAM22    | -1,692595 | -1,622672 | <b>-1,6576335</b> | 2104 | 2166 | <b>2135</b>   |
| DHRSX     | -1,683559 | -1,631494 | <b>-1,6575265</b> | 1493 | 1619 | <b>1556</b>   |
| C15orf37  | -2,145508 | -1,16945  | <b>-1,657479</b>  | 1783 | 1527 | <b>1655</b>   |
| MESDC2    | -2,577947 | -0,734053 | <b>-1,656</b>     | 2038 | 2441 | <b>2239,5</b> |
| COL4A5    | -2,95078  | -0,358877 | <b>-1,6548285</b> | 1438 | 1919 | <b>1678,5</b> |
| FN1       | -1,501375 | -1,807879 | <b>-1,654627</b>  | 1697 | 2245 | <b>1971</b>   |
| ODF3L1    | -1,72583  | -1,577586 | <b>-1,651708</b>  | 1416 | 2421 | <b>1918,5</b> |
| FAM163A   | -1,651333 | NaN       | <b>-1,651333</b>  | 1832 | NaN  | <b>1832</b>   |
| UXS1      | -1,859662 | -1,439477 | <b>-1,6495695</b> | 1996 | 2529 | <b>2262,5</b> |
| PTPN6     | -1,650477 | -1,647803 | <b>-1,64914</b>   | 1465 | 1984 | <b>1724,5</b> |
| CRLS1     | NaN       | -1,648942 | <b>-1,648942</b>  | NaN  | 2729 | <b>2729</b>   |
| HYAL4     | -1,699489 | -1,594336 | <b>-1,6469125</b> | 1311 | 2333 | <b>1822</b>   |
| CNGA3     | -1,907993 | -1,380279 | <b>-1,644136</b>  | 1905 | 2900 | <b>2402,5</b> |
| NT5E      | -1,841628 | -1,444711 | <b>-1,6431695</b> | 1589 | 2048 | <b>1818,5</b> |
| RNF150    | -1,701917 | -1,584205 | <b>-1,643061</b>  | 1656 | 1669 | <b>1662,5</b> |
| H2AFY2    | -1,641829 | NaN       | <b>-1,641829</b>  | 2146 | NaN  | <b>2146</b>   |
| CRIP1     | -1,446862 | -1,834888 | <b>-1,640875</b>  | 1108 | 2032 | <b>1570</b>   |
| ERF       | -1,912944 | -1,365175 | <b>-1,6390595</b> | 1511 | 1635 | <b>1573</b>   |
| CSDA      | -1,077365 | -2,19849  | <b>-1,6379275</b> | 1664 | 1711 | <b>1687,5</b> |
| HLA-E     | -1,287399 | -1,98793  | <b>-1,6376645</b> | 1784 | 1984 | <b>1884</b>   |
| RBKS      | -1,937291 | -1,336873 | <b>-1,637082</b>  | 1702 | 2173 | <b>1937,5</b> |
| THOC2     | -1,158795 | -2,111109 | <b>-1,634952</b>  | 1260 | 1907 | <b>1583,5</b> |
| INSM1     | -2,016681 | -1,249217 | <b>-1,632949</b>  | 1461 | 2296 | <b>1878,5</b> |
| AUTS2     | -1,8275   | -1,437783 | <b>-1,6326415</b> | 1657 | 1704 | <b>1680,5</b> |
| RNF214    | -1,912459 | -1,351524 | <b>-1,6319915</b> | 1309 | 2203 | <b>1756</b>   |
| PPP3R2    | -1,650698 | -1,612827 | <b>-1,6317625</b> | 719  | 1507 | <b>1113</b>   |
| HIST1H2BD | -1,629796 | NaN       | <b>-1,629796</b>  | 1690 | NaN  | <b>1690</b>   |
| C20orf12  | -1,629227 | NaN       | <b>-1,629227</b>  | 1662 | NaN  | <b>1662</b>   |

|          |           |           |                   |      |      |               |
|----------|-----------|-----------|-------------------|------|------|---------------|
| OR12D2   | -1,406294 | -1,850858 | <b>-1,628576</b>  | 1883 | 2209 | <b>2046</b>   |
| DENND5B  | -1,699129 | -1,55716  | <b>-1,6281445</b> | 1238 | 1474 | <b>1356</b>   |
| LRR32    | -2,474271 | -0,780094 | <b>-1,6271825</b> | 1458 | 1937 | <b>1697,5</b> |
| ABO      | -1,582063 | -1,672122 | <b>-1,6270925</b> | 1782 | 2516 | <b>2149</b>   |
| ITPR3    | -1,855502 | -1,398407 | <b>-1,6269545</b> | 1564 | 1915 | <b>1739,5</b> |
| FBX06    | -1,947437 | -1,30587  | <b>-1,6266535</b> | 1558 | 2954 | <b>2256</b>   |
| IL1F10   | -1,801086 | -1,450493 | <b>-1,6257895</b> | 1847 | 2209 | <b>2028</b>   |
| PAQR5    | -1,632745 | -1,616109 | <b>-1,624427</b>  | 1407 | 1656 | <b>1531,5</b> |
| SLC25A41 | -2,118226 | -1,122695 | <b>-1,6204605</b> | 1389 | 1847 | <b>1618</b>   |
| POC1A    | -1,620157 | NaN       | <b>-1,620157</b>  | 1729 | NaN  | <b>1729</b>   |
| ZNF750   | -1,619316 | NaN       | <b>-1,619316</b>  | 1691 | NaN  | <b>1691</b>   |
| PAQR6    | -1,618839 | NaN       | <b>-1,618839</b>  | 1424 | NaN  | <b>1424</b>   |
| BECN1    | -1,360354 | -1,876571 | <b>-1,6184625</b> | 1350 | 1803 | <b>1576,5</b> |
| LARS     | -2,137659 | -1,097743 | <b>-1,617701</b>  | 1458 | 1268 | <b>1363</b>   |
| DMRTC2   | -2,102174 | -1,131875 | <b>-1,6170245</b> | 1327 | 2442 | <b>1884,5</b> |
| FAT2     | -1,61702  | NaN       | <b>-1,61702</b>   | 1431 | NaN  | <b>1431</b>   |
| ZNF140   | -1,616418 | NaN       | <b>-1,616418</b>  | 1618 | NaN  | <b>1618</b>   |
| FAM55D   | -2,065674 | -1,164839 | <b>-1,6152565</b> | 1700 | 2413 | <b>2056,5</b> |
| CCR4     | -1,992376 | -1,236744 | <b>-1,61456</b>   | 1384 | 2002 | <b>1693</b>   |
| MT3      | -0,665126 | -2,563333 | <b>-1,6142295</b> | 1837 | 1934 | <b>1885,5</b> |
| FURIN    | -1,237366 | -1,990269 | <b>-1,6138175</b> | 1422 | 1990 | <b>1706</b>   |
| PTGDR    | -1,612987 | NaN       | <b>-1,612987</b>  | 1555 | NaN  | <b>1555</b>   |
| LRR34C   | -1,612568 | NaN       | <b>-1,612568</b>  | 1762 | NaN  | <b>1762</b>   |
| CYFIP2   | -1,718477 | -1,504551 | <b>-1,611514</b>  | 1217 | 1872 | <b>1544,5</b> |
| C1orf227 | -2,296175 | -0,926535 | <b>-1,611355</b>  | 1579 | 1369 | <b>1474</b>   |
| SMR3B    | -1,365145 | -1,85402  | <b>-1,6095825</b> | 622  | 2441 | <b>1531,5</b> |
| ATP6V0A4 | -1,55815  | -1,660383 | <b>-1,6092665</b> | 1953 | 2658 | <b>2305,5</b> |
| KDM3B    | -1,701578 | -1,513894 | <b>-1,607736</b>  | 1400 | 2163 | <b>1781,5</b> |
| RHOV     | -2,113066 | -1,101228 | <b>-1,607147</b>  | 1366 | 1602 | <b>1484</b>   |
| CCDC93   | -2,175543 | -1,037857 | <b>-1,6067</b>    | 1584 | 1946 | <b>1765</b>   |
| RBPM5    | -1,715368 | -1,497469 | <b>-1,6064185</b> | 2269 | 2228 | <b>2248,5</b> |
| ALG2     | -1,123104 | -2,087983 | <b>-1,6055435</b> | 1636 | 2345 | <b>1990,5</b> |
| CLPTM1L  | -1,604423 | NaN       | <b>-1,604423</b>  | 1659 | NaN  | <b>1659</b>   |
| CD300C   | -1,483134 | -1,722522 | <b>-1,602828</b>  | 912  | 1140 | <b>1026</b>   |



|          |           |           |                   |      |      |               |
|----------|-----------|-----------|-------------------|------|------|---------------|
| IFI30    | -1,247374 | -1,958126 | <b>-1,60275</b>   | 1806 | 2618 | <b>2212</b>   |
| VPS36    | -1,602063 | NaN       | <b>-1,602063</b>  | 1356 | NaN  | <b>1356</b>   |
| SCRG1    | -1,601405 | NaN       | <b>-1,601405</b>  | 1822 | NaN  | <b>1822</b>   |
| MIS12    | -2,053764 | -1,147983 | <b>-1,6008735</b> | 1930 | 1820 | <b>1875</b>   |
| CLEC14A  | -1,783013 | -1,418573 | <b>-1,600793</b>  | 1066 | 1719 | <b>1392,5</b> |
| DDX19A   | -1,976784 | -1,224603 | <b>-1,6006935</b> | 2121 | 2498 | <b>2309,5</b> |
| TMEM179  | -1,600577 | NaN       | <b>-1,600577</b>  | 1572 | NaN  | <b>1572</b>   |
| RND3     | -2,311004 | -0,886887 | <b>-1,5989455</b> | 1682 | 2326 | <b>2004</b>   |
| IMPG1    | -1,59887  | NaN       | <b>-1,59887</b>   | 977  | NaN  | <b>977</b>    |
| TOP1MT   | -1,402685 | -1,794913 | <b>-1,598799</b>  | 619  | 1636 | <b>1127,5</b> |
| E2F4     | -1,908363 | -1,288803 | <b>-1,598583</b>  | 1879 | 2411 | <b>2145</b>   |
| C9orf79  | -1,598226 | NaN       | <b>-1,598226</b>  | 1546 | NaN  | <b>1546</b>   |
| PURB     | -1,598009 | NaN       | <b>-1,598009</b>  | 1814 | NaN  | <b>1814</b>   |
| RHBG     | -2,088865 | -1,107131 | <b>-1,597998</b>  | 1559 | 1765 | <b>1662</b>   |
| C15orf17 | -1,166472 | -2,027582 | <b>-1,597027</b>  | 1367 | 1563 | <b>1465</b>   |
| CD22     | -0,973823 | -2,219445 | <b>-1,596634</b>  | 1384 | 1922 | <b>1653</b>   |
| FBXO38   | -1,753155 | -1,440078 | <b>-1,5966165</b> | 1381 | 1881 | <b>1631</b>   |
| ETS1     | -1,788058 | -1,403025 | <b>-1,5955415</b> | 1800 | 2581 | <b>2190,5</b> |
| TMEM30B  | -2,132576 | -1,054682 | <b>-1,593629</b>  | 1576 | 1811 | <b>1693,5</b> |
| EBAG9    | -1,705778 | -1,480868 | <b>-1,593323</b>  | 1408 | 1868 | <b>1638</b>   |
| ITIH2    | -1,419221 | -1,764893 | <b>-1,592057</b>  | 1015 | 1174 | <b>1094,5</b> |
| MCM3     | -2,014115 | -1,169463 | <b>-1,591789</b>  | 1862 | 2551 | <b>2206,5</b> |
| TIMM50   | -0,728301 | -2,452471 | <b>-1,590386</b>  | 1956 | 2507 | <b>2231,5</b> |
| KCNN3    | -2,142238 | -1,035623 | <b>-1,5889305</b> | 1354 | 1983 | <b>1668,5</b> |
| UBQLN3   | -1,997621 | -1,180126 | <b>-1,5888735</b> | 1592 | 2227 | <b>1909,5</b> |
| CRYBB3   | -2,21899  | -0,956988 | <b>-1,587989</b>  | 1406 | 1843 | <b>1624,5</b> |
| TDRD12   | -1,587893 | NaN       | <b>-1,587893</b>  | 1576 | NaN  | <b>1576</b>   |
| NFKB1    | -1,679922 | -1,494453 | <b>-1,5871875</b> | 1757 | 2244 | <b>2000,5</b> |
| B3GNT7   | -1,627532 | -1,546758 | <b>-1,587145</b>  | 1476 | 2126 | <b>1801</b>   |
| KRT5     | -1,586215 | NaN       | <b>-1,586215</b>  | 1712 | NaN  | <b>1712</b>   |
| DPF2     | -1,430064 | -1,742169 | <b>-1,5861165</b> | 1047 | 1744 | <b>1395,5</b> |
| RBL2     | -2,092061 | -1,076778 | <b>-1,5844195</b> | 1748 | 2539 | <b>2143,5</b> |
| SLA      | -1,760933 | -1,407553 | <b>-1,584243</b>  | 1332 | 1581 | <b>1456,5</b> |
| TAAR6    | -1,583318 | NaN       | <b>-1,583318</b>  | 1473 | NaN  | <b>1473</b>   |

|          |           |           |                   |      |      |               |
|----------|-----------|-----------|-------------------|------|------|---------------|
| ORC3     | -2,09854  | -1,067752 | <b>-1,583146</b>  | 1257 | 2717 | <b>1987</b>   |
| VCAM1    | -1,937174 | -1,226553 | <b>-1,5818635</b> | 1331 | 1685 | <b>1508</b>   |
| VPS54    | -1,969958 | -1,192333 | <b>-1,5811455</b> | 1509 | 1293 | <b>1401</b>   |
| LHX8     | -1,580364 | NaN       | <b>-1,580364</b>  | 1926 | NaN  | <b>1926</b>   |
| TTC19    | -1,742127 | -1,417553 | <b>-1,57984</b>   | 1243 | 1923 | <b>1583</b>   |
| PDE4D    | -1,947046 | -1,211812 | <b>-1,579429</b>  | 1606 | 2148 | <b>1877</b>   |
| KRTAP5-4 | -1,330576 | -1,826368 | <b>-1,578472</b>  | 2203 | 2035 | <b>2119</b>   |
| SFPQ     | -1,578279 | NaN       | <b>-1,578279</b>  | 1238 | NaN  | <b>1238</b>   |
| OR2W1    | -1,965247 | -1,191196 | <b>-1,5782215</b> | 1551 | 2079 | <b>1815</b>   |
| ORAI2    | -1,577064 | NaN       | <b>-1,577064</b>  | 1227 | NaN  | <b>1227</b>   |
| LRRRC36  | -2,160986 | -0,992943 | <b>-1,5769645</b> | 1836 | 2126 | <b>1981</b>   |
| DNTT     | NaN       | -1,572615 | <b>-1,572615</b>  | NaN  | 3132 | <b>3132</b>   |
| NID2     | -1,66549  | -1,476692 | <b>-1,571091</b>  | 1691 | 1850 | <b>1770,5</b> |
| NBN      | -1,156485 | -1,982046 | <b>-1,5692655</b> | 1128 | 1917 | <b>1522,5</b> |
| PRPF19   | -1,634284 | -1,501985 | <b>-1,5681345</b> | 1166 | 1567 | <b>1366,5</b> |
| DHRS13   | -2,083896 | -1,051277 | <b>-1,5675865</b> | 1532 | 2190 | <b>1861</b>   |
| FLT3LG   | -2,312059 | -0,82106  | <b>-1,5665595</b> | 641  | 1369 | <b>1005</b>   |
| PPIH     | -1,121713 | -2,011116 | <b>-1,5664145</b> | 1494 | 1737 | <b>1615,5</b> |
| TIPARP   | NaN       | -1,566401 | <b>-1,566401</b>  | NaN  | 2758 | <b>2758</b>   |
| LMBR1    | -2,330411 | -0,800431 | <b>-1,565421</b>  | 2045 | 2192 | <b>2118,5</b> |
| TMEM117  | -1,660835 | -1,469419 | <b>-1,565127</b>  | 1986 | 2441 | <b>2213,5</b> |
| NOL4     | -0,430437 | -2,698781 | <b>-1,564609</b>  | 1319 | 1984 | <b>1651,5</b> |
| NSUN4    | -1,563954 | NaN       | <b>-1,563954</b>  | 1816 | NaN  | <b>1816</b>   |
| NAGPA    | -1,899951 | -1,227785 | <b>-1,563868</b>  | 2096 | 2024 | <b>2060</b>   |
| ZNF138   | -1,451059 | -1,676015 | <b>-1,563537</b>  | 1410 | 2284 | <b>1847</b>   |
| EIF4E    | -1,934926 | -1,189442 | <b>-1,562184</b>  | 1567 | 1559 | <b>1563</b>   |
| AARS2    | -1,142612 | -1,980357 | <b>-1,5614845</b> | 1840 | 2513 | <b>2176,5</b> |
| ACER2    | -1,629432 | -1,492874 | <b>-1,561153</b>  | 1841 | 1798 | <b>1819,5</b> |
| TP53RK   | -1,450165 | -1,671199 | <b>-1,560682</b>  | 1936 | 2350 | <b>2143</b>   |
| ZNF135   | -1,07915  | -2,040468 | <b>-1,559809</b>  | 1764 | 1319 | <b>1541,5</b> |
| ASCL4    | -1,410586 | -1,70654  | <b>-1,558563</b>  | 1145 | 1861 | <b>1503</b>   |
| GOLT1B   | -1,55698  | NaN       | <b>-1,55698</b>   | 1756 | NaN  | <b>1756</b>   |
| BSND     | -1,930876 | -1,183081 | <b>-1,5569785</b> | 1747 | 2110 | <b>1928,5</b> |
| SCNN1A   | -2,009897 | -1,104    | <b>-1,5569485</b> | 1512 | 2262 | <b>1887</b>   |

|         |           |           |                   |      |      |               |
|---------|-----------|-----------|-------------------|------|------|---------------|
| ARL8A   | -0,985925 | -2,127654 | <b>-1,5567895</b> | 1444 | 1766 | <b>1605</b>   |
| FAM168B | -0,976685 | -2,134093 | <b>-1,555389</b>  | 863  | 2116 | <b>1489,5</b> |
| CLASP1  | -2,367663 | -0,741207 | <b>-1,554435</b>  | 1948 | 2870 | <b>2409</b>   |
| TTC7A   | -1,265116 | -1,842396 | <b>-1,553756</b>  | 1984 | 2245 | <b>2114,5</b> |
| TMEM169 | -1,553442 | NaN       | <b>-1,553442</b>  | 1819 | NaN  | <b>1819</b>   |
| FMO5    | -0,864373 | -2,242403 | <b>-1,553388</b>  | 1761 | 1733 | <b>1747</b>   |
| GNB4    | -2,079513 | -1,024353 | <b>-1,551933</b>  | 1390 | 2207 | <b>1798,5</b> |
| DLGAP4  | -0,867439 | -2,234942 | <b>-1,5511905</b> | 1643 | 2229 | <b>1936</b>   |
| C3orf39 | -1,551101 | NaN       | <b>-1,55101</b>   | 709  | NaN  | <b>709</b>    |
| PDP1    | -1,879858 | -1,22193  | <b>-1,550894</b>  | 1999 | 2332 | <b>2165,5</b> |
| ZDHC19  | -1,549917 | NaN       | <b>-1,549917</b>  | 1050 | NaN  | <b>1050</b>   |
| ZNF410  | -1,919327 | -1,179818 | <b>-1,5495725</b> | 1670 | 2162 | <b>1916</b>   |
| LMO4    | -2,037304 | -1,056466 | <b>-1,546885</b>  | 2160 | 2745 | <b>2452,5</b> |
| RRAD    | -1,347379 | -1,746323 | <b>-1,546851</b>  | 1403 | 2104 | <b>1753,5</b> |
| RHO     | -1,546822 | NaN       | <b>-1,546822</b>  | 1729 | NaN  | <b>1729</b>   |
| NFE2L1  | -1,655645 | -1,436313 | <b>-1,545979</b>  | 1288 | 1979 | <b>1633,5</b> |
| ORAOV1  | -1,545752 | NaN       | <b>-1,545752</b>  | 2084 | NaN  | <b>2084</b>   |
| FZR1    | -1,825311 | -1,266042 | <b>-1,5456765</b> | 1636 | 2763 | <b>2199,5</b> |
| FOXE1   | -1,29398  | -1,797233 | <b>-1,5456065</b> | 1038 | 1740 | <b>1389</b>   |
| SLC12A4 | -1,626551 | -1,464541 | <b>-1,545546</b>  | 1390 | 1463 | <b>1426,5</b> |
| MEA1    | -1,54491  | NaN       | <b>-1,54491</b>   | 1545 | NaN  | <b>1545</b>   |
| MACROD1 | 0,085084  | -3,174846 | <b>-1,544881</b>  | 1823 | 3115 | <b>2469</b>   |
| GPR3    | -1,544095 | NaN       | <b>-1,544095</b>  | 761  | NaN  | <b>761</b>    |
| ADRB3   | -1,543162 | NaN       | <b>-1,543162</b>  | 1655 | NaN  | <b>1655</b>   |
| TACR2   | -1,540607 | NaN       | <b>-1,540607</b>  | 1744 | NaN  | <b>1744</b>   |
| DPY19L3 | -1,540465 | NaN       | <b>-1,540465</b>  | 1671 | NaN  | <b>1671</b>   |
| FAM96A  | -2,029769 | -1,051161 | <b>-1,540465</b>  | 1693 | 1953 | <b>1823</b>   |
| UNC13B  | -1,61556  | -1,461637 | <b>-1,5385985</b> | 1974 | 1978 | <b>1976</b>   |
| PBX2    | -1,861887 | -1,213674 | <b>-1,5377805</b> | 1550 | 1998 | <b>1774</b>   |
| GOSR2   | NaN       | -1,537642 | <b>-1,537642</b>  | NaN  | 1992 | <b>1992</b>   |
| EFHC2   | -1,537136 | NaN       | <b>-1,537136</b>  | 1917 | NaN  | <b>1917</b>   |
| TSPAN13 | -1,552018 | -1,520582 | <b>-1,5363</b>    | 1043 | 1986 | <b>1514,5</b> |
| SLC36A2 | -2,268515 | -0,802618 | <b>-1,5355665</b> | 1661 | 2133 | <b>1897</b>   |
| SYK     | -1,898465 | -1,172062 | <b>-1,5352635</b> | 1544 | 1413 | <b>1478,5</b> |

|           |           |           |                   |      |      |               |
|-----------|-----------|-----------|-------------------|------|------|---------------|
| GRAMD2    | -1,846806 | -1,219789 | <b>-1,5332975</b> | 2367 | 2123 | <b>2245</b>   |
| SLC38A8   | -1,53238  | NaN       | <b>-1,53238</b>   | 1697 | NaN  | <b>1697</b>   |
| HDDC2     | -2,134213 | -0,92944  | <b>-1,5318265</b> | 1240 | 2061 | <b>1650,5</b> |
| CBR3      | NaN       | -1,528951 | <b>-1,528951</b>  | NaN  | 2337 | <b>2337</b>   |
| ENOSF1    | -1,528309 | NaN       | <b>-1,528309</b>  | 1616 | NaN  | <b>1616</b>   |
| FAM114A1  | -1,306129 | -1,748792 | <b>-1,5274605</b> | 1753 | 2236 | <b>1994,5</b> |
| TFDP2     | -1,728124 | -1,325963 | <b>-1,5270435</b> | 1666 | 1726 | <b>1696</b>   |
| KCNC1     | -1,713387 | -1,337787 | <b>-1,525587</b>  | 1436 | 2274 | <b>1855</b>   |
| CHAT      | -1,28168  | -1,769    | <b>-1,52534</b>   | 1749 | 1706 | <b>1727,5</b> |
| CSN2      | -1,782522 | -1,264641 | <b>-1,5235815</b> | 1845 | 2120 | <b>1982,5</b> |
| NEU1      | -1,53832  | -1,504034 | <b>-1,521177</b>  | 1617 | 2401 | <b>2009</b>   |
| DLX1      | -1,868628 | -1,173643 | <b>-1,5211355</b> | 1766 | 1849 | <b>1807,5</b> |
| KRTAP15-1 | -1,627454 | -1,413741 | <b>-1,5205975</b> | 1110 | 1470 | <b>1290</b>   |
| HLA-DPB1  | NaN       | -1,518749 | <b>-1,518749</b>  | NaN  | 1883 | <b>1883</b>   |
| CREBL2    | -1,114982 | -1,921413 | <b>-1,5181975</b> | 1691 | 2400 | <b>2045,5</b> |
| ELF5      | NaN       | -1,518138 | <b>-1,518138</b>  | NaN  | 2114 | <b>2114</b>   |
| PTPDC1    | -1,668016 | -1,365666 | <b>-1,516841</b>  | 1311 | 2666 | <b>1988,5</b> |
| TRIM61    | -2,275025 | -0,757287 | <b>-1,516156</b>  | 1713 | 2742 | <b>2227,5</b> |
| OR52N2    | -1,966934 | -1,063536 | <b>-1,515235</b>  | 1493 | 1794 | <b>1643,5</b> |
| SPINK4    | -2,206213 | -0,822609 | <b>-1,514411</b>  | 2258 | 2195 | <b>2226,5</b> |
| MAPK1IP1L | -1,813548 | -1,213778 | <b>-1,513663</b>  | 1253 | 1415 | <b>1334</b>   |
| PEA15     | -1,15678  | -1,869232 | <b>-1,513006</b>  | 1605 | 2245 | <b>1925</b>   |
| FBXO28    | -1,937155 | -1,088728 | <b>-1,5129415</b> | 1858 | 2861 | <b>2359,5</b> |
| RSPO4     | -2,703515 | -0,321512 | <b>-1,5125135</b> | 1925 | 2819 | <b>2372</b>   |
| OR13F1    | -1,510761 | NaN       | <b>-1,510761</b>  | 1403 | NaN  | <b>1403</b>   |
| ZC3H8     | -1,459208 | -1,562198 | <b>-1,510703</b>  | 1160 | 1612 | <b>1386</b>   |
| SRGAP3    | -1,510688 | NaN       | <b>-1,510688</b>  | 1857 | NaN  | <b>1857</b>   |
| ST8SIA6   | -1,825598 | -1,195001 | <b>-1,5102995</b> | 1428 | 1671 | <b>1549,5</b> |
| UBQLN4    | -1,567211 | -1,452641 | <b>-1,509926</b>  | 1766 | 2312 | <b>2039</b>   |
| YWHAG     | -1,982284 | -1,037455 | <b>-1,5098695</b> | 1496 | 2107 | <b>1801,5</b> |
| OR3A1     | -2,144404 | -0,871725 | <b>-1,5080645</b> | 1364 | 1584 | <b>1474</b>   |
| LIMS1     | -1,507816 | NaN       | <b>-1,507816</b>  | 1892 | NaN  | <b>1892</b>   |
| GLRA3     | -1,154278 | -1,861117 | <b>-1,5076975</b> | 2045 | 2812 | <b>2428,5</b> |
| IL8       | -1,240748 | -1,774424 | <b>-1,507586</b>  | 1297 | 2125 | <b>1711</b>   |

|           |           |           |                   |      |      |               |
|-----------|-----------|-----------|-------------------|------|------|---------------|
| STT3B     | -1,903509 | -1,11046  | <b>-1,5069845</b> | 1696 | 2063 | <b>1879,5</b> |
| OR51B4    | -1,675275 | -1,338148 | <b>-1,5067115</b> | 1362 | 1820 | <b>1591</b>   |
| APOL1     | -1,618164 | -1,391414 | <b>-1,504789</b>  | 1939 | 2724 | <b>2331,5</b> |
| NOVA1     | -1,50432  | NaN       | <b>-1,50432</b>   | 1866 | NaN  | <b>1866</b>   |
| ZNF474    | -1,212844 | -1,79575  | <b>-1,504297</b>  | 1710 | 2091 | <b>1900,5</b> |
| RGL1      | -1,050212 | -1,958234 | <b>-1,504223</b>  | 1974 | 2303 | <b>2138,5</b> |
| OTUD6A    | -1,502755 | NaN       | <b>-1,502755</b>  | 1775 | NaN  | <b>1775</b>   |
| ZNF287    | -1,880543 | -1,123205 | <b>-1,501874</b>  | 1821 | 2506 | <b>2163,5</b> |
| LUZP1     | -1,500772 | NaN       | <b>-1,500772</b>  | 1936 | NaN  | <b>1936</b>   |
| PRDM1     | -2,093441 | -0,906445 | <b>-1,499943</b>  | 1719 | 2154 | <b>1936,5</b> |
| PCDHGB3   | -1,499413 | NaN       | <b>-1,499413</b>  | 1609 | NaN  | <b>1609</b>   |
| FAM71E1   | -1,873678 | -1,123239 | <b>-1,4984585</b> | 1869 | 2881 | <b>2375</b>   |
| LIG3      | -1,154506 | -1,842119 | <b>-1,4983125</b> | 1341 | 1866 | <b>1603,5</b> |
| SAMD13    | -1,072802 | -1,923769 | <b>-1,4982855</b> | 1544 | 2451 | <b>1997,5</b> |
| CHODL     | -1,497688 | NaN       | <b>-1,497688</b>  | 1879 | NaN  | <b>1879</b>   |
| POLR2F    | -1,435905 | -1,559449 | <b>-1,497677</b>  | 859  | 665  | <b>762</b>    |
| KLHL4     | -1,070146 | -1,92274  | <b>-1,496443</b>  | 1476 | 1812 | <b>1644</b>   |
| KHDRBS1   | -1,298998 | -1,692148 | <b>-1,495573</b>  | 1554 | 1777 | <b>1665,5</b> |
| ARHGAP33  | -0,474531 | -2,512703 | <b>-1,493617</b>  | 1086 | 1811 | <b>1448,5</b> |
| NOVA2     | -2,226426 | -0,75951  | <b>-1,492968</b>  | 1835 | 2083 | <b>1959</b>   |
| MOCOS     | -1,350785 | -1,634708 | <b>-1,4927465</b> | 792  | 1184 | <b>988</b>    |
| BRCA2     | -2,236573 | -0,748477 | <b>-1,492525</b>  | 1611 | 2477 | <b>2044</b>   |
| HIST1H2BK | -2,015854 | -0,967859 | <b>-1,4918565</b> | 1818 | 2286 | <b>2052</b>   |
| ABTB2     | -2,400859 | -0,581278 | <b>-1,4910685</b> | 1766 | 2145 | <b>1955,5</b> |
| FNDC1     | -1,665459 | -1,316177 | <b>-1,490818</b>  | 1635 | 1985 | <b>1810</b>   |
| TBL2      | -2,657477 | -0,323936 | <b>-1,4907065</b> | 2023 | 2631 | <b>2327</b>   |
| NMRAL1    | -1,861594 | -1,118029 | <b>-1,4898115</b> | 1601 | 1884 | <b>1742,5</b> |
| POLR2B    | NaN       | -1,487298 | <b>-1,487298</b>  | NaN  | 1333 | <b>1333</b>   |
| CEP85     | -1,5455   | -1,427755 | <b>-1,4866275</b> | 1621 | 2178 | <b>1899,5</b> |
| GPR78     | -2,183364 | -0,789709 | <b>-1,4865365</b> | 2003 | 1518 | <b>1760,5</b> |
| PPFIA2    | -1,27627  | -1,692013 | <b>-1,4841415</b> | 1395 | 2046 | <b>1720,5</b> |
| PDK1      | -1,565055 | -1,401444 | <b>-1,4832495</b> | 1770 | 2072 | <b>1921</b>   |
| ADAM28    | -1,215355 | -1,751141 | <b>-1,483248</b>  | 2132 | 2513 | <b>2322,5</b> |
| CSTL1     | -2,272986 | -0,69252  | <b>-1,482753</b>  | 1499 | 1846 | <b>1672,5</b> |

|          |           |           |                   |      |      |               |
|----------|-----------|-----------|-------------------|------|------|---------------|
| TGFBR2   | -0,557902 | -2,406616 | <b>-1,482259</b>  | 1937 | 2184 | <b>2060,5</b> |
| MICALL2  | -1,224803 | -1,739639 | <b>-1,482221</b>  | 1439 | 1934 | <b>1686,5</b> |
| RANBP17  | -1,081581 | -1,882806 | <b>-1,4821935</b> | 1735 | 1762 | <b>1748,5</b> |
| ZNF629   | -1,482013 | NaN       | <b>-1,482013</b>  | 1971 | NaN  | <b>1971</b>   |
| RXRB     | -1,182799 | -1,779617 | <b>-1,481208</b>  | 999  | 2042 | <b>1520,5</b> |
| TMEM237  | -2,571139 | -0,39004  | <b>-1,4805895</b> | 1637 | 2434 | <b>2035,5</b> |
| PGM3     | -1,552451 | -1,407436 | <b>-1,4799435</b> | 1604 | 2578 | <b>2091</b>   |
| LENEP    | -1,479757 | NaN       | <b>-1,479757</b>  | 1585 | NaN  | <b>1585</b>   |
| NSFL1C   | -1,479421 | NaN       | <b>-1,479421</b>  | 1530 | NaN  | <b>1530</b>   |
| RFXAP    | -2,329867 | -0,628434 | <b>-1,4791505</b> | 1468 | 2567 | <b>2017,5</b> |
| CABP7    | -1,478798 | NaN       | <b>-1,478798</b>  | 1906 | NaN  | <b>1906</b>   |
| NEU2     | -1,290808 | -1,662648 | <b>-1,476728</b>  | 1717 | 1894 | <b>1805,5</b> |
| TRAPPC8  | -1,234525 | -1,717522 | <b>-1,4760235</b> | 1725 | 2116 | <b>1920,5</b> |
| MED14    | -0,944758 | -2,00616  | <b>-1,475459</b>  | 1201 | 1249 | <b>1225</b>   |
| C9orf102 | -1,474906 | NaN       | <b>-1,474906</b>  | 1459 | NaN  | <b>1459</b>   |
| AGRN     | -1,71685  | -1,232404 | <b>-1,474627</b>  | 1576 | 1586 | <b>1581</b>   |
| CH25H    | -1,728981 | -1,220047 | <b>-1,474514</b>  | 1913 | 2074 | <b>1993,5</b> |
| TMEM207  | -1,001902 | -1,946991 | <b>-1,4744465</b> | 1759 | 2238 | <b>1998,5</b> |
| RIMS3    | -1,474315 | NaN       | <b>-1,474315</b>  | 1721 | NaN  | <b>1721</b>   |
| ADAM2    | -1,44929  | -1,497848 | <b>-1,473569</b>  | 1468 | 1856 | <b>1662</b>   |
| RG9MTD2  | -1,137524 | -1,80839  | <b>-1,472957</b>  | 1132 | 1128 | <b>1130</b>   |
| AZI1     | -1,849507 | -1,096343 | <b>-1,472925</b>  | 1469 | 2074 | <b>1771,5</b> |
| PSPH     | -0,598845 | -2,346951 | <b>-1,472898</b>  | 1033 | 1920 | <b>1476,5</b> |
| DDR2     | -1,3785   | -1,566208 | <b>-1,472354</b>  | 1377 | 2234 | <b>1805,5</b> |
| OPCML    | -1,658787 | -1,284131 | <b>-1,471459</b>  | 1764 | 1804 | <b>1784</b>   |
| CLCA1    | -1,599133 | -1,343504 | <b>-1,4713185</b> | 1218 | 1513 | <b>1365,5</b> |
| NUDT10   | -1,206743 | -1,735305 | <b>-1,471024</b>  | 1589 | 2534 | <b>2061,5</b> |
| LILRA5   | -1,470231 | NaN       | <b>-1,470231</b>  | 1666 | NaN  | <b>1666</b>   |
| SSTR1    | -1,46998  | NaN       | <b>-1,46998</b>   | 1650 | NaN  | <b>1650</b>   |
| RMND5B   | -1,749408 | -1,190272 | <b>-1,46984</b>   | 1684 | 2635 | <b>2159,5</b> |
| ATP5G3   | -0,637341 | -2,301948 | <b>-1,4696445</b> | 1455 | 2192 | <b>1823,5</b> |
| KRAS     | -1,574621 | -1,362982 | <b>-1,4688015</b> | 1343 | 1824 | <b>1583,5</b> |
| MOAP1    | -1,796602 | -1,140836 | <b>-1,468719</b>  | 2032 | 2057 | <b>2044,5</b> |
| ANKH     | -1,973677 | -0,96179  | <b>-1,4677335</b> | 1601 | 2132 | <b>1866,5</b> |

|          |           |           |                   |      |      |               |
|----------|-----------|-----------|-------------------|------|------|---------------|
| BLID     | -1,466945 | NaN       | <b>-1,466945</b>  | 1250 | NaN  | <b>1250</b>   |
| BRSK1    | -1,725546 | -1,208234 | <b>-1,46689</b>   | 1877 | 2080 | <b>1978,5</b> |
| TBC1D15  | -1,227602 | -1,704769 | <b>-1,4661855</b> | 1065 | 1590 | <b>1327,5</b> |
| SOD1     | NaN       | -1,464464 | <b>-1,464464</b>  | NaN  | 2268 | <b>2268</b>   |
| LRRC8E   | -1,463247 | NaN       | <b>-1,463247</b>  | 1595 | NaN  | <b>1595</b>   |
| UEVLD    | -1,625955 | -1,300499 | <b>-1,463227</b>  | 1545 | 1758 | <b>1651,5</b> |
| GABRG2   | -1,42592  | -1,500501 | <b>-1,4632105</b> | 1545 | 2188 | <b>1866,5</b> |
| DARS     | -1,562915 | -1,362914 | <b>-1,4629145</b> | 1835 | 2185 | <b>2010</b>   |
| TFPI     | -1,960371 | -0,9653   | <b>-1,4628355</b> | 2103 | 2108 | <b>2105,5</b> |
| MAP3K3   | -2,133316 | -0,791666 | <b>-1,462491</b>  | 1555 | 2060 | <b>1807,5</b> |
| ZNF57    | -1,462339 | NaN       | <b>-1,462339</b>  | 1561 | NaN  | <b>1561</b>   |
| ZNF470   | -1,578607 | -1,344373 | <b>-1,46149</b>   | 1606 | 1923 | <b>1764,5</b> |
| C10orf2  | -1,851851 | -1,070645 | <b>-1,461248</b>  | 1485 | 2089 | <b>1787</b>   |
| CSTF3    | -1,460496 | -1,459577 | <b>-1,4600365</b> | 1706 | 1995 | <b>1850,5</b> |
| C6orf27  | -1,054981 | -1,865023 | <b>-1,460002</b>  | 1865 | 2033 | <b>1949</b>   |
| HELZ     | -1,227336 | -1,691775 | <b>-1,4595555</b> | 1464 | 1640 | <b>1552</b>   |
| TAS2R8   | -1,620536 | -1,298442 | <b>-1,459489</b>  | 1917 | 1889 | <b>1903</b>   |
| PRTFDC1  | -1,493566 | -1,424536 | <b>-1,459051</b>  | 1221 | 2042 | <b>1631,5</b> |
| AP2M1    | -1,050732 | -1,865408 | <b>-1,45807</b>   | 1467 | 2869 | <b>2168</b>   |
| GALR1    | -1,457627 | NaN       | <b>-1,457627</b>  | 1517 | NaN  | <b>1517</b>   |
| ADAM20   | -0,818677 | -2,096328 | <b>-1,4575025</b> | 1129 | 2021 | <b>1575</b>   |
| TMEM127  | -1,457209 | NaN       | <b>-1,457209</b>  | 1652 | NaN  | <b>1652</b>   |
| RALGAPA1 | -1,456317 | NaN       | <b>-1,456317</b>  | 1290 | NaN  | <b>1290</b>   |
| TCF21    | -1,721622 | -1,187519 | <b>-1,4545705</b> | 1727 | 1808 | <b>1767,5</b> |
| UGCG     | -0,630093 | -2,276366 | <b>-1,4532295</b> | 1088 | 2085 | <b>1586,5</b> |
| SLC26A8  | -1,559991 | -1,345606 | <b>-1,4527985</b> | 629  | 1887 | <b>1258</b>   |
| PCDHB12  | -1,451077 | NaN       | <b>-1,451077</b>  | 1734 | NaN  | <b>1734</b>   |
| ACSM5    | -2,053563 | -0,847209 | <b>-1,450386</b>  | 1522 | 2103 | <b>1812,5</b> |
| OR4C15   | -1,953916 | -0,946728 | <b>-1,450322</b>  | 2281 | 3172 | <b>2726,5</b> |
| PIM1     | -1,529944 | -1,37063  | <b>-1,450287</b>  | 1494 | 1711 | <b>1602,5</b> |
| DCAKD    | -1,450094 | NaN       | <b>-1,450094</b>  | 1475 | NaN  | <b>1475</b>   |
| PLA2G4F  | -0,379419 | -2,520678 | <b>-1,4500485</b> | 1755 | 1685 | <b>1720</b>   |
| EMX1     | -1,510686 | -1,388024 | <b>-1,449355</b>  | 640  | 1179 | <b>909,5</b>  |
| TBC1D10C | -0,948836 | -1,948706 | <b>-1,448771</b>  | 1560 | 2024 | <b>1792</b>   |

|          |           |           |                   |      |      |               |
|----------|-----------|-----------|-------------------|------|------|---------------|
| WNT8A    | -0,256184 | -2,641249 | <b>-1,4487165</b> | 1765 | 2317 | <b>2041</b>   |
| PVR      | -0,996366 | -1,900995 | <b>-1,4486805</b> | 1353 | 1755 | <b>1554</b>   |
| ADRA1D   | -1,31815  | -1,578463 | <b>-1,4483065</b> | 1603 | 2057 | <b>1830</b>   |
| YTHDC1   | -1,655507 | -1,238933 | <b>-1,44722</b>   | 1069 | 1579 | <b>1324</b>   |
| ATP6V0D1 | -1,377577 | -1,516585 | <b>-1,447081</b>  | 1167 | 1829 | <b>1498</b>   |
| CSTA     | -1,480285 | -1,413824 | <b>-1,4470545</b> | 1957 | 2860 | <b>2408,5</b> |
| WNK1     | -1,920203 | -0,972844 | <b>-1,4465235</b> | 1260 | 1517 | <b>1388,5</b> |
| FLG      | -1,441085 | NaN       | <b>-1,441085</b>  | 1905 | NaN  | <b>1905</b>   |
| POLR3K   | -1,456959 | -1,425204 | <b>-1,4410815</b> | 1464 | 2097 | <b>1780,5</b> |
| B3GALT1  | -1,743958 | -1,137859 | <b>-1,4409085</b> | 1815 | 1944 | <b>1879,5</b> |
| UROC1    | -1,516503 | -1,365194 | <b>-1,4408485</b> | 1375 | 1624 | <b>1499,5</b> |
| CARTPT   | -0,743384 | -2,137559 | <b>-1,4404715</b> | 1059 | 1920 | <b>1489,5</b> |
| GCFC1    | -1,440395 | NaN       | <b>-1,440395</b>  | 2154 | NaN  | <b>2154</b>   |
| ZXDC     | -1,899133 | -0,981457 | <b>-1,440295</b>  | 1343 | 1911 | <b>1627</b>   |
| HOMEZ    | -1,440271 | NaN       | <b>-1,440271</b>  | 1637 | NaN  | <b>1637</b>   |
| GGA3     | -1,465821 | -1,413512 | <b>-1,4396665</b> | 1839 | 2120 | <b>1979,5</b> |
| PDGFRL   | -1,38429  | -1,490837 | <b>-1,4375635</b> | 1765 | 2133 | <b>1949</b>   |
| TP53INP2 | -1,93952  | -0,934342 | <b>-1,436931</b>  | 1934 | 2304 | <b>2119</b>   |
| UBTD2    | -1,436346 | NaN       | <b>-1,436346</b>  | 2135 | NaN  | <b>2135</b>   |
| KRT32    | -1,435961 | NaN       | <b>-1,435961</b>  | 1358 | NaN  | <b>1358</b>   |
| MYL9     | -2,140193 | -0,73149  | <b>-1,4358415</b> | 1727 | 1614 | <b>1670,5</b> |
| KRTAP1-1 | -1,435708 | NaN       | <b>-1,435708</b>  | 1813 | NaN  | <b>1813</b>   |
| MPP3     | -1,431405 | -1,439408 | <b>-1,4354065</b> | 1560 | 2224 | <b>1892</b>   |
| TARS     | -1,45012  | -1,420441 | <b>-1,4352805</b> | 1111 | 1455 | <b>1283</b>   |
| KBTBD11  | -1,38598  | -1,484104 | <b>-1,435042</b>  | 1926 | 2623 | <b>2274,5</b> |
| IL36RN   | -1,322821 | -1,547232 | <b>-1,4350265</b> | 2031 | 2230 | <b>2130,5</b> |
| SCN7A    | -0,698672 | -2,171025 | <b>-1,4348485</b> | 2265 | 3178 | <b>2721,5</b> |
| EDDM3B   | -1,773792 | -1,095414 | <b>-1,434603</b>  | 1044 | 1926 | <b>1485</b>   |
| GCLM     | -2,011624 | -0,85432  | <b>-1,432972</b>  | 2032 | 2062 | <b>2047</b>   |
| SLC29A1  | -1,179405 | -1,685813 | <b>-1,432609</b>  | 1660 | 2234 | <b>1947</b>   |
| BCKDHB   | -1,408545 | -1,456413 | <b>-1,432479</b>  | 1908 | 3172 | <b>2540</b>   |
| HRH1     | -1,432305 | NaN       | <b>-1,432305</b>  | 957  | NaN  | <b>957</b>    |
| MPZL1    | -1,431568 | NaN       | <b>-1,431568</b>  | 1379 | NaN  | <b>1379</b>   |
| STAR     | -1,492549 | -1,369205 | <b>-1,430877</b>  | 729  | 779  | <b>754</b>    |



|          |           |           |                   |      |      |               |
|----------|-----------|-----------|-------------------|------|------|---------------|
| EPHX3    | NaN       | -1,428188 | <b>-1,428188</b>  | NaN  | 2751 | <b>2751</b>   |
| F8       | -0,781509 | -2,07264  | <b>-1,4270745</b> | 1291 | 2699 | <b>1995</b>   |
| RPP40    | -2,107288 | -0,746619 | <b>-1,4269535</b> | 1745 | 2167 | <b>1956</b>   |
| ZNF678   | -2,068328 | -0,785421 | <b>-1,4268745</b> | 1178 | 2711 | <b>1944,5</b> |
| IHH      | -0,98799  | -1,86539  | <b>-1,42669</b>   | 811  | 1535 | <b>1173</b>   |
| MTERFD1  | -1,426076 | NaN       | <b>-1,426076</b>  | 1801 | NaN  | <b>1801</b>   |
| ARVCF    | -1,441403 | -1,409359 | <b>-1,425381</b>  | 1491 | 2062 | <b>1776,5</b> |
| GTF3C2   | NaN       | -1,424594 | <b>-1,424594</b>  | NaN  | 2560 | <b>2560</b>   |
| HSDL1    | -0,45998  | -2,387979 | <b>-1,4239795</b> | 1590 | 2275 | <b>1932,5</b> |
| SH3GLB1  | -1,423956 | NaN       | <b>-1,423956</b>  | 1756 | NaN  | <b>1756</b>   |
| CCND1    | -1,593908 | -1,253239 | <b>-1,4235735</b> | 950  | 1171 | <b>1060,5</b> |
| TIGD6    | -1,423536 | NaN       | <b>-1,423536</b>  | 1608 | NaN  | <b>1608</b>   |
| HSD17B10 | -1,477835 | -1,368502 | <b>-1,4231685</b> | 1409 | 2433 | <b>1921</b>   |
| IL1B     | NaN       | -1,422574 | <b>-1,422574</b>  | NaN  | 2456 | <b>2456</b>   |
| CLTC     | -1,331774 | -1,51283  | <b>-1,422302</b>  | 1259 | 1978 | <b>1618,5</b> |
| DYM      | -1,607781 | -1,235145 | <b>-1,421463</b>  | 1420 | 1793 | <b>1606,5</b> |
| MYBPC3   | -0,962733 | -1,879107 | <b>-1,42092</b>   | 1353 | 2047 | <b>1700</b>   |
| GPAM     | -1,131868 | -1,709485 | <b>-1,4206765</b> | 1829 | 2381 | <b>2105</b>   |
| ZNF121   | -1,419471 | NaN       | <b>-1,419471</b>  | 1567 | NaN  | <b>1567</b>   |
| RASIP1   | -1,418743 | NaN       | <b>-1,418743</b>  | 1445 | NaN  | <b>1445</b>   |
| NUDT2    | -1,642169 | -1,194201 | <b>-1,418185</b>  | 1105 | 2098 | <b>1601,5</b> |
| PRPSAP1  | -2,94854  | 0,113503  | <b>-1,4175185</b> | 2126 | 2745 | <b>2435,5</b> |
| STAU2    | -1,888614 | -0,946286 | <b>-1,41745</b>   | 1906 | 2696 | <b>2301</b>   |
| MANF     | -1,884499 | -0,950035 | <b>-1,417267</b>  | 1693 | 2272 | <b>1982,5</b> |
| FIGLA    | -1,325999 | -1,505638 | <b>-1,4158185</b> | 1643 | 1772 | <b>1707,5</b> |
| TMEM141  | -1,413418 | NaN       | <b>-1,413418</b>  | 2137 | NaN  | <b>2137</b>   |
| PTPN23   | -1,669555 | -1,156301 | <b>-1,412928</b>  | 1531 | 1990 | <b>1760,5</b> |
| MLANA    | -0,879571 | -1,946019 | <b>-1,412795</b>  | 1166 | 2001 | <b>1583,5</b> |
| IP6K3    | -0,549054 | -2,276403 | <b>-1,4127285</b> | 886  | 2073 | <b>1479,5</b> |
| MBD6     | -1,863985 | -0,961368 | <b>-1,4126765</b> | 1703 | 1977 | <b>1840</b>   |
| FAM13A   | -1,361929 | -1,462868 | <b>-1,4123985</b> | 1417 | 1857 | <b>1637</b>   |
| COX8C    | -1,540803 | -1,283053 | <b>-1,411928</b>  | 2139 | 2444 | <b>2291,5</b> |
| IFI44L   | -1,410877 | NaN       | <b>-1,410877</b>  | 1157 | NaN  | <b>1157</b>   |
| ADRB2    | -2,609541 | -0,212054 | <b>-1,4107975</b> | 2139 | 2426 | <b>2282,5</b> |

|          |           |           |                   |      |      |               |
|----------|-----------|-----------|-------------------|------|------|---------------|
| RASSF8   | -1,409759 | NaN       | <b>-1,409759</b>  | 1662 | NaN  | <b>1662</b>   |
| FGFBP2   | -1,785566 | -1,033054 | <b>-1,40931</b>   | 1339 | 1872 | <b>1605,5</b> |
| TPD52L1  | -1,715006 | -1,10306  | <b>-1,409033</b>  | 1795 | 1868 | <b>1831,5</b> |
| ZMYM2    | -1,408915 | NaN       | <b>-1,408915</b>  | 2064 | NaN  | <b>2064</b>   |
| RPRML    | -1,551889 | -1,264105 | <b>-1,407997</b>  | 1113 | 1662 | <b>1387,5</b> |
| PCGF2    | -0,674144 | -2,141318 | <b>-1,407731</b>  | 1387 | 2129 | <b>1758</b>   |
| TP63     | -1,904441 | -0,909401 | <b>-1,406921</b>  | 1129 | 1816 | <b>1472,5</b> |
| SPG20    | -1,999641 | -0,81234  | <b>-1,4059905</b> | 1691 | 2389 | <b>2040</b>   |
| NR2E3    | -1,351994 | -1,457307 | <b>-1,4046505</b> | 1615 | 1922 | <b>1768,5</b> |
| CLDND1   | -2,139023 | -0,668675 | <b>-1,403849</b>  | 1710 | 2469 | <b>2089,5</b> |
| FAM59A   | -1,403107 | NaN       | <b>-1,403107</b>  | 1721 | NaN  | <b>1721</b>   |
| OR4K17   | -1,950844 | -0,854108 | <b>-1,402476</b>  | 1277 | 1497 | <b>1387</b>   |
| SCUBE2   | -2,253705 | -0,551091 | <b>-1,402398</b>  | 1731 | 2633 | <b>2182</b>   |
| TRERF1   | -1,264511 | -1,540056 | <b>-1,4022835</b> | 1893 | 2032 | <b>1962,5</b> |
| EFCAB7   | -1,625028 | -1,178978 | <b>-1,402003</b>  | 1556 | 1809 | <b>1682,5</b> |
| GAD1     | -1,173015 | -1,629286 | <b>-1,4011505</b> | 993  | 2077 | <b>1535</b>   |
| MVD      | -1,547705 | -1,25275  | <b>-1,4002275</b> | 1737 | 1618 | <b>1677,5</b> |
| KRT14    | -1,821549 | -0,978141 | <b>-1,399845</b>  | 1670 | 1839 | <b>1754,5</b> |
| GTPBP6   | -1,399813 | NaN       | <b>-1,399813</b>  | 1783 | NaN  | <b>1783</b>   |
| N4BP2L1  | -1,399809 | NaN       | <b>-1,399809</b>  | 1918 | NaN  | <b>1918</b>   |
| TMEM133  | -1,398955 | NaN       | <b>-1,398955</b>  | 1467 | NaN  | <b>1467</b>   |
| KRTAP5-6 | -1,43211  | -1,363522 | <b>-1,397816</b>  | 1375 | 2314 | <b>1844,5</b> |
| CPXCR1   | -1,191903 | -1,60208  | <b>-1,3969915</b> | 1510 | 1655 | <b>1582,5</b> |
| C16orf74 | -1,760224 | -1,03153  | <b>-1,395877</b>  | 1377 | 1974 | <b>1675,5</b> |
| IL18RAP  | -1,149883 | -1,640664 | <b>-1,3952735</b> | 1018 | 1509 | <b>1263,5</b> |
| EFNB3    | -2,006902 | -0,782765 | <b>-1,3948335</b> | 2120 | 2272 | <b>2196</b>   |
| ACACB    | -1,619698 | -1,169766 | <b>-1,394732</b>  | 1636 | 1811 | <b>1723,5</b> |
| RNF180   | -1,613636 | -1,175295 | <b>-1,3944655</b> | 1571 | 2492 | <b>2031,5</b> |
| WTAP     | -0,703328 | -2,083235 | <b>-1,3932815</b> | 1919 | 2441 | <b>2180</b>   |
| PEX11G   | -1,077161 | -1,708397 | <b>-1,392779</b>  | 1791 | 1661 | <b>1726</b>   |
| CD19     | -0,539042 | -2,243091 | <b>-1,3910665</b> | 1093 | 1521 | <b>1307</b>   |
| GLRA4    | -1,907919 | -0,873333 | <b>-1,390626</b>  | 1660 | 2401 | <b>2030,5</b> |
| RMND5A   | -1,358458 | -1,420539 | <b>-1,3894985</b> | 1882 | 3033 | <b>2457,5</b> |
| TDP2     | -1,556023 | -1,222474 | <b>-1,3892485</b> | 1505 | 2073 | <b>1789</b>   |

|          |           |           |                   |      |      |               |
|----------|-----------|-----------|-------------------|------|------|---------------|
| MRPL46   | -1,283369 | -1,494626 | <b>-1,3889975</b> | 1682 | 2140 | <b>1911</b>   |
| CCDC38   | -0,925378 | -1,852032 | <b>-1,388705</b>  | 1126 | 1590 | <b>1358</b>   |
| SLC3A2   | NaN       | -1,388299 | <b>-1,388299</b>  | NaN  | 2754 | <b>2754</b>   |
| LCAT     | -1,793802 | -0,982276 | <b>-1,388039</b>  | 1826 | 1914 | <b>1870</b>   |
| FAM71F2  | -1,598189 | -1,176892 | <b>-1,3875405</b> | 1490 | 2270 | <b>1880</b>   |
| CHST13   | -1,467206 | -1,307862 | <b>-1,387534</b>  | 1077 | 1751 | <b>1414</b>   |
| MKKS     | -1,649746 | -1,124957 | <b>-1,3873515</b> | 1568 | 1729 | <b>1648,5</b> |
| PDRG1    | -1,387043 | NaN       | <b>-1,387043</b>  | 1847 | NaN  | <b>1847</b>   |
| C19orf26 | -1,207677 | -1,566264 | <b>-1,3869705</b> | 1704 | 2256 | <b>1980</b>   |
| POLR2C   | -1,277389 | -1,49619  | <b>-1,3867895</b> | 1305 | 1304 | <b>1304,5</b> |
| USP6NL   | -1,385804 | NaN       | <b>-1,385804</b>  | 1555 | NaN  | <b>1555</b>   |
| HSF5     | -1,608274 | -1,162591 | <b>-1,3854325</b> | 1768 | 2156 | <b>1962</b>   |
| CCDC22   | -1,384283 | NaN       | <b>-1,384283</b>  | 1545 | NaN  | <b>1545</b>   |
| EBF3     | -1,384031 | NaN       | <b>-1,384031</b>  | 1081 | NaN  | <b>1081</b>   |
| NLN      | -1,068638 | -1,697905 | <b>-1,3832715</b> | 1293 | 2036 | <b>1664,5</b> |
| SIGLEC9  | -1,382197 | NaN       | <b>-1,382197</b>  | 1560 | NaN  | <b>1560</b>   |
| APLN     | -1,381745 | NaN       | <b>-1,381745</b>  | 1708 | NaN  | <b>1708</b>   |
| FERD3L   | -1,160464 | -1,602383 | <b>-1,3814235</b> | 1622 | 2405 | <b>2013,5</b> |
| SYT3     | -1,381038 | NaN       | <b>-1,381038</b>  | 1680 | NaN  | <b>1680</b>   |
| ADH5     | -1,165122 | -1,59656  | <b>-1,380841</b>  | 1146 | 1680 | <b>1413</b>   |
| OR2S2    | -1,379446 | NaN       | <b>-1,379446</b>  | 1108 | NaN  | <b>1108</b>   |
| RNFT1    | -1,45081  | -1,307807 | <b>-1,3793085</b> | 1412 | 2229 | <b>1820,5</b> |
| HSD17B6  | -1,772058 | -0,9862   | <b>-1,379129</b>  | 1726 | 1882 | <b>1804</b>   |
| FADS2    | -1,438688 | -1,318473 | <b>-1,3785805</b> | 2244 | 2451 | <b>2347,5</b> |
| PSMD2    | -1,378446 | NaN       | <b>-1,378446</b>  | 795  | NaN  | <b>795</b>    |
| SDCBP    | -1,097966 | -1,658353 | <b>-1,3781595</b> | 1343 | 1611 | <b>1477</b>   |
| PITPNM2  | -1,272909 | -1,482131 | <b>-1,37752</b>   | 1101 | 1495 | <b>1298</b>   |
| CLMP     | -2,043529 | -0,710134 | <b>-1,3768315</b> | 1549 | 2036 | <b>1792,5</b> |
| TMEM43   | -1,375565 | NaN       | <b>-1,375565</b>  | 1868 | NaN  | <b>1868</b>   |
| TRIM50   | -1,58967  | -1,1611   | <b>-1,375385</b>  | 1563 | 2162 | <b>1862,5</b> |
| PIAS1    | -1,706683 | -1,044018 | <b>-1,3753505</b> | 1589 | 2495 | <b>2042</b>   |
| ATP6V1H  | -1,536989 | -1,213313 | <b>-1,375151</b>  | 1380 | 2555 | <b>1967,5</b> |
| PPM1J    | -1,954322 | -0,794261 | <b>-1,3742915</b> | 1144 | 1576 | <b>1360</b>   |
| SYNCRIP  | -1,127474 | -1,620327 | <b>-1,3739005</b> | 1550 | 1850 | <b>1700</b>   |

|          |           |           |                   |      |      |               |
|----------|-----------|-----------|-------------------|------|------|---------------|
| C22orf40 | -1,452608 | -1,29309  | <b>-1,372849</b>  | 1481 | 2711 | <b>2096</b>   |
| NKAIN3   | -0,435441 | -2,309786 | <b>-1,3726135</b> | 1823 | 2151 | <b>1987</b>   |
| ASTN1    | -1,372    | NaN       | <b>-1,372</b>     | 1357 | NaN  | <b>1357</b>   |
| PITPNA   | -1,072644 | -1,671319 | <b>-1,3719815</b> | 1743 | 2430 | <b>2086,5</b> |
| C10orf90 | -1,093605 | -1,649172 | <b>-1,3713885</b> | 1671 | 2141 | <b>1906</b>   |
| LPAR2    | -1,371244 | NaN       | <b>-1,371244</b>  | 1679 | NaN  | <b>1679</b>   |
| LMBR1L   | -1,370535 | NaN       | <b>-1,370535</b>  | 1620 | NaN  | <b>1620</b>   |
| STAB2    | -1,449791 | -1,29081  | <b>-1,3703005</b> | 1275 | 1671 | <b>1473</b>   |
| ACRV1    | -1,369949 | NaN       | <b>-1,369949</b>  | 1029 | NaN  | <b>1029</b>   |
| TAS2R13  | -1,431668 | -1,307622 | <b>-1,369645</b>  | 2333 | 2688 | <b>2510,5</b> |
| ZSCAN20  | -1,369644 | NaN       | <b>-1,369644</b>  | 1702 | NaN  | <b>1702</b>   |
| SENP7    | -1,740787 | -0,997793 | <b>-1,36929</b>   | 1456 | 2130 | <b>1793</b>   |
| PLSCR2   | -1,110202 | -1,628104 | <b>-1,369153</b>  | 1338 | 2031 | <b>1684,5</b> |
| GABRA6   | -1,460951 | -1,274613 | <b>-1,367782</b>  | 1611 | 2363 | <b>1987</b>   |
| ATG7     | -1,599208 | -1,134327 | <b>-1,3667675</b> | 1669 | 2566 | <b>2117,5</b> |
| CLEC4M   | -0,934106 | -1,799002 | <b>-1,366554</b>  | 1412 | 1573 | <b>1492,5</b> |
| REM2     | -1,530701 | -1,202205 | <b>-1,366453</b>  | 1402 | 2376 | <b>1889</b>   |
| HSP90AA1 | NaN       | -1,366444 | <b>-1,366444</b>  | NaN  | 2950 | <b>2950</b>   |
| PRKCE    | -2,162345 | -0,570277 | <b>-1,366311</b>  | 1566 | 2000 | <b>1783</b>   |
| RHBDF1   | -1,540365 | -1,188939 | <b>-1,364652</b>  | 2016 | 2118 | <b>2067</b>   |
| DNER     | -1,913912 | -0,813793 | <b>-1,3638525</b> | 1626 | 1825 | <b>1725,5</b> |
| CDKL5    | -1,715274 | -1,010943 | <b>-1,3631085</b> | 2017 | 1967 | <b>1992</b>   |
| STARD7   | -0,880234 | -1,845636 | <b>-1,362935</b>  | 1724 | 2084 | <b>1904</b>   |
| TRIM23   | -1,744104 | -0,981724 | <b>-1,362914</b>  | 1524 | 2252 | <b>1888</b>   |
| EIF1B    | -1,372814 | -1,352361 | <b>-1,3625875</b> | 1621 | 2067 | <b>1844</b>   |
| SDR9C7   | NaN       | -1,362386 | <b>-1,362386</b>  | NaN  | 2173 | <b>2173</b>   |
| SMPD1    | -1,772919 | -0,950193 | <b>-1,361556</b>  | 2109 | 2406 | <b>2257,5</b> |
| GJA3     | -1,169056 | -1,550614 | <b>-1,359835</b>  | 1592 | 2507 | <b>2049,5</b> |
| SLCO5A1  | -1,255066 | -1,464416 | <b>-1,359741</b>  | 1533 | 1883 | <b>1708</b>   |
| SLC30A6  | -1,506275 | -1,212653 | <b>-1,359464</b>  | 1881 | 1815 | <b>1848</b>   |
| SLC28A2  | -1,310971 | -1,407105 | <b>-1,359038</b>  | 1375 | 2229 | <b>1802</b>   |
| PSME3    | -1,594765 | -1,121742 | <b>-1,3582535</b> | 1411 | 1557 | <b>1484</b>   |
| NDP      | -1,673016 | -1,040634 | <b>-1,356825</b>  | 1734 | 2290 | <b>2012</b>   |
| CYP1B1   | -2,239633 | -0,473887 | <b>-1,35676</b>   | 1468 | 1904 | <b>1686</b>   |

|          |           |           |                   |      |      |               |
|----------|-----------|-----------|-------------------|------|------|---------------|
| ABCA8    | -0,702147 | -2,009512 | <b>-1,3558295</b> | 1659 | 2123 | <b>1891</b>   |
| DGKG     | -0,897311 | -1,812358 | <b>-1,3548345</b> | 1636 | 1232 | <b>1434</b>   |
| RBM15    | -1,092994 | -1,614927 | <b>-1,3539605</b> | 2190 | 2248 | <b>2219</b>   |
| EIF2S2   | NaN       | -1,353795 | <b>-1,353795</b>  | NaN  | 1828 | <b>1828</b>   |
| NUP160   | -1,353747 | NaN       | <b>-1,353747</b>  | 1478 | NaN  | <b>1478</b>   |
| MYC      | -1,162514 | -1,544678 | <b>-1,353596</b>  | 963  | 1170 | <b>1066,5</b> |
| KRTAP4-7 | -0,944108 | -1,760119 | <b>-1,3521135</b> | 1654 | 1702 | <b>1678</b>   |
| JOSD1    | -1,661363 | -1,042639 | <b>-1,352001</b>  | 1845 | 1776 | <b>1810,5</b> |
| CCDC69   | -1,350801 | NaN       | <b>-1,350801</b>  | 1572 | NaN  | <b>1572</b>   |
| TRIM21   | -2,212606 | -0,488711 | <b>-1,3506585</b> | 1199 | 1890 | <b>1544,5</b> |
| GFRA4    | -1,482294 | -1,218176 | <b>-1,350235</b>  | 1343 | 2292 | <b>1817,5</b> |
| FNBP1    | -1,350111 | NaN       | <b>-1,350111</b>  | 1926 | NaN  | <b>1926</b>   |
| NCSTN    | -1,387662 | -1,312395 | <b>-1,3500285</b> | 2120 | 2526 | <b>2323</b>   |
| ZNF549   | -1,31464  | -1,385021 | <b>-1,3498305</b> | 1661 | 2133 | <b>1897</b>   |
| C5orf44  | -1,349241 | NaN       | <b>-1,349241</b>  | 1424 | NaN  | <b>1424</b>   |
| ZNF511   | -1,607481 | -1,089956 | <b>-1,3487185</b> | 1291 | 2028 | <b>1659,5</b> |
| BOC      | -1,348049 | NaN       | <b>-1,348049</b>  | 1470 | NaN  | <b>1470</b>   |
| MEN1     | -1,58795  | -1,108095 | <b>-1,3480225</b> | 1485 | 2012 | <b>1748,5</b> |
| SLC39A12 | -1,212963 | -1,482247 | <b>-1,347605</b>  | 280  | 1014 | <b>647</b>    |
| PAFAH1B3 | -1,821934 | -0,871808 | <b>-1,346871</b>  | 1476 | 1713 | <b>1594,5</b> |
| STC1     | -1,424073 | -1,26916  | <b>-1,3466165</b> | 1706 | 2142 | <b>1924</b>   |
| STARD8   | -1,3463   | NaN       | <b>-1,3463</b>    | 1674 | NaN  | <b>1674</b>   |
| ARC      | -0,797867 | -1,891815 | <b>-1,344841</b>  | 1478 | 2474 | <b>1976</b>   |
| ZNF718   | -1,344685 | NaN       | <b>-1,344685</b>  | 1680 | NaN  | <b>1680</b>   |
| ITGAD    | -1,741932 | -0,946491 | <b>-1,3442115</b> | 866  | 1206 | <b>1036</b>   |
| FLJ44635 | -1,280881 | -1,40745  | <b>-1,3441655</b> | 1704 | 2022 | <b>1863</b>   |
| WNT7B    | -1,343778 | NaN       | <b>-1,343778</b>  | 1187 | NaN  | <b>1187</b>   |
| TUBG1    | -0,237377 | -2,450069 | <b>-1,343723</b>  | 1670 | 2496 | <b>2083</b>   |
| DARC     | -2,248301 | -0,435373 | <b>-1,341837</b>  | 2041 | 2437 | <b>2239</b>   |
| BBS2     | -1,3412   | NaN       | <b>-1,3412</b>    | 1597 | NaN  | <b>1597</b>   |
| TBX21    | -2,030364 | -0,651842 | <b>-1,341103</b>  | 1718 | 2121 | <b>1919,5</b> |
| C9orf4   | -1,76367  | -0,917852 | <b>-1,340761</b>  | 1778 | 2042 | <b>1910</b>   |
| OLFML2A  | -1,195959 | -1,48409  | <b>-1,3400245</b> | 1383 | 1941 | <b>1662</b>   |
| MCHR2    | -1,33983  | NaN       | <b>-1,33983</b>   | 1811 | NaN  | <b>1811</b>   |

|          |           |           |                   |      |      |               |
|----------|-----------|-----------|-------------------|------|------|---------------|
| SLC44A2  | -0,67855  | -2,001075 | <b>-1,3398125</b> | 1404 | 1846 | <b>1625</b>   |
| MAP3K13  | -1,363059 | -1,31052  | <b>-1,3367895</b> | 2092 | 2458 | <b>2275</b>   |
| CEPT1    | -1,598131 | -1,075196 | <b>-1,3366635</b> | 1326 | 1681 | <b>1503,5</b> |
| PARVA    | -0,681999 | -1,991258 | <b>-1,3366285</b> | 1396 | 2621 | <b>2008,5</b> |
| TOR2A    | -1,087101 | -1,585451 | <b>-1,336276</b>  | 1237 | 1721 | <b>1479</b>   |
| FOXI1    | -1,301274 | -1,370174 | <b>-1,335724</b>  | 1588 | 2524 | <b>2056</b>   |
| MB21D1   | -1,392129 | -1,279238 | <b>-1,3356835</b> | 1816 | 2416 | <b>2116</b>   |
| ILVBL    | -1,372879 | -1,298308 | <b>-1,3355935</b> | 1339 | 1907 | <b>1623</b>   |
| ARMC8    | -1,362719 | -1,307636 | <b>-1,3351775</b> | 1371 | 1781 | <b>1576</b>   |
| C12orf62 | -1,335097 | NaN       | <b>-1,335097</b>  | 1622 | NaN  | <b>1622</b>   |
| OR8B12   | -1,001585 | -1,668313 | <b>-1,334949</b>  | 1494 | 1632 | <b>1563</b>   |
| DQX1     | -1,389997 | -1,279774 | <b>-1,3348855</b> | 1611 | 2412 | <b>2011,5</b> |
| CYB5RL   | -1,334626 | NaN       | <b>-1,334626</b>  | 1616 | NaN  | <b>1616</b>   |
| COPE     | -1,084448 | -1,584496 | <b>-1,334472</b>  | 1940 | 2065 | <b>2002,5</b> |
| OC90     | -1,247821 | -1,420525 | <b>-1,334173</b>  | 1473 | 1899 | <b>1686</b>   |
| AMHR2    | -1,838502 | -0,829444 | <b>-1,333973</b>  | 1719 | 2355 | <b>2037</b>   |
| UBA7     | -1,620915 | -1,045982 | <b>-1,3334485</b> | 1619 | 2321 | <b>1970</b>   |
| COL11A2  | -1,333442 | NaN       | <b>-1,333442</b>  | 1829 | NaN  | <b>1829</b>   |
| OR6C4    | -1,332955 | NaN       | <b>-1,332955</b>  | 1994 | NaN  | <b>1994</b>   |
| SERPINI2 | -1,435028 | -1,230695 | <b>-1,3328615</b> | 1439 | 1719 | <b>1579</b>   |
| SPG11    | -1,590045 | -1,072695 | <b>-1,33137</b>   | 1956 | 2889 | <b>2422,5</b> |
| RAP1GAP  | -0,724354 | -1,937223 | <b>-1,3307885</b> | 1625 | 1821 | <b>1723</b>   |
| HAVCR1   | -0,745381 | -1,914825 | <b>-1,330103</b>  | 1728 | 2032 | <b>1880</b>   |
| GPRC5D   | -1,329831 | NaN       | <b>-1,329831</b>  | 1316 | NaN  | <b>1316</b>   |
| DIEXF    | -1,916914 | -0,742297 | <b>-1,3296055</b> | 1452 | 1828 | <b>1640</b>   |
| U2AF1L4  | -1,329011 | NaN       | <b>-1,329011</b>  | 1890 | NaN  | <b>1890</b>   |
| WNT3A    | -1,328522 | NaN       | <b>-1,328522</b>  | 1829 | NaN  | <b>1829</b>   |
| BIRC5    | -1,140276 | -1,516756 | <b>-1,328516</b>  | 971  | 1351 | <b>1161</b>   |
| RINL     | -1,527968 | -1,127747 | <b>-1,3278575</b> | 1930 | 2158 | <b>2044</b>   |
| USP47    | -1,728271 | -0,927143 | <b>-1,327707</b>  | 2067 | 2300 | <b>2183,5</b> |
| ICAM3    | -1,850179 | -0,804497 | <b>-1,327338</b>  | 1393 | 1432 | <b>1412,5</b> |
| IDI1     | -1,15327  | -1,501001 | <b>-1,3271355</b> | 1197 | 1682 | <b>1439,5</b> |
| NUP85    | -1,326548 | NaN       | <b>-1,326548</b>  | 1520 | NaN  | <b>1520</b>   |
| PCDHAC1  | -1,546685 | -1,105227 | <b>-1,325956</b>  | 1545 | 2728 | <b>2136,5</b> |

|           |           |           |                   |      |      |               |
|-----------|-----------|-----------|-------------------|------|------|---------------|
| REXO4     | -1,193461 | -1,456482 | <b>-1,3249715</b> | 1384 | 2064 | <b>1724</b>   |
| U2AF1     | -1,413511 | -1,235307 | <b>-1,324409</b>  | 1207 | 1804 | <b>1505,5</b> |
| CTBP1     | -1,866179 | -0,78103  | <b>-1,3236045</b> | 979  | 1850 | <b>1414,5</b> |
| PEX3      | -2,005496 | -0,638436 | <b>-1,321966</b>  | 1611 | 1755 | <b>1683</b>   |
| SLC16A9   | -0,785291 | -1,858353 | <b>-1,321822</b>  | 1930 | 2219 | <b>2074,5</b> |
| TBX3      | -1,11809  | -1,524926 | <b>-1,321508</b>  | 1933 | 2097 | <b>2015</b>   |
| C14orf79  | -0,636646 | -2,006312 | <b>-1,321479</b>  | 1479 | 1768 | <b>1623,5</b> |
| SERPINA1  | -1,404864 | -1,23613  | <b>-1,320497</b>  | 1010 | 2031 | <b>1520,5</b> |
| SEMA3A    | -2,000072 | -0,640166 | <b>-1,320119</b>  | 1658 | 2399 | <b>2028,5</b> |
| LY9       | -1,106037 | -1,53391  | <b>-1,3199735</b> | 1621 | 2219 | <b>1920</b>   |
| ACTN3     | -1,446242 | -1,193349 | <b>-1,3197955</b> | 1748 | 1734 | <b>1741</b>   |
| DTWD2     | -1,551703 | -1,086603 | <b>-1,319153</b>  | 1383 | 1869 | <b>1626</b>   |
| RUVBL2    | -1,45212  | -1,185581 | <b>-1,3188505</b> | 1465 | 2388 | <b>1926,5</b> |
| SIGLEC1   | -1,318593 | NaN       | <b>-1,318593</b>  | 1375 | NaN  | <b>1375</b>   |
| SFXN5     | -1,900385 | -0,736517 | <b>-1,318451</b>  | 1560 | 2525 | <b>2042,5</b> |
| KIF27     | -1,308343 | -1,327373 | <b>-1,317858</b>  | 1864 | 2212 | <b>2038</b>   |
| PLXNB3    | -1,601565 | -1,033958 | <b>-1,3177615</b> | 1576 | 2141 | <b>1858,5</b> |
| C6orf64   | -1,316376 | NaN       | <b>-1,316376</b>  | 1526 | NaN  | <b>1526</b>   |
| ZSWIM7    | -1,316366 | NaN       | <b>-1,316366</b>  | 1765 | NaN  | <b>1765</b>   |
| CDX4      | -1,301994 | -1,32935  | <b>-1,315672</b>  | 1696 | 2464 | <b>2080</b>   |
| PAPD5     | -1,72854  | -0,902664 | <b>-1,315602</b>  | 1840 | 2472 | <b>2156</b>   |
| FLT3      | -0,777381 | -1,853245 | <b>-1,315313</b>  | 2016 | 1976 | <b>1996</b>   |
| ZNF346    | -0,859396 | -1,770074 | <b>-1,314735</b>  | 2213 | 1942 | <b>2077,5</b> |
| S100A9    | -1,836338 | -0,792982 | <b>-1,31466</b>   | 1705 | 2099 | <b>1902</b>   |
| PIWIL3    | -1,105468 | -1,523517 | <b>-1,3144925</b> | 1253 | 2042 | <b>1647,5</b> |
| UGT2A3    | -1,636271 | -0,992332 | <b>-1,3143015</b> | 1734 | 2300 | <b>2017</b>   |
| VNN2      | -0,900089 | -1,72807  | <b>-1,3140795</b> | 1951 | 2215 | <b>2083</b>   |
| LRMP      | -1,849179 | -0,77861  | <b>-1,3138945</b> | 1727 | 2106 | <b>1916,5</b> |
| RFC3      | -1,372779 | -1,254546 | <b>-1,3136625</b> | 1406 | 2012 | <b>1709</b>   |
| LINC00303 | -1,494939 | -1,131889 | <b>-1,313414</b>  | 1558 | 1958 | <b>1758</b>   |
| GRIA4     | -1,522487 | -1,101681 | <b>-1,312084</b>  | 2217 | 2864 | <b>2540,5</b> |
| C3orf26   | -0,961796 | -1,658821 | <b>-1,3103085</b> | 967  | 1660 | <b>1313,5</b> |
| PLOD3     | -1,761369 | -0,859114 | <b>-1,3102415</b> | 1411 | 1833 | <b>1622</b>   |
| ZNF569    | -1,41572  | -1,202908 | <b>-1,309314</b>  | 2148 | 1953 | <b>2050,5</b> |

|          |           |           |                   |      |      |               |
|----------|-----------|-----------|-------------------|------|------|---------------|
| CYP2C19  | -1,540343 | -1,078054 | <b>-1,3091985</b> | 1661 | 1420 | <b>1540,5</b> |
| IGSF11   | -1,132903 | -1,485017 | <b>-1,30896</b>   | 2146 | 2308 | <b>2227</b>   |
| CD8A     | -1,308691 | NaN       | <b>-1,308691</b>  | 1844 | NaN  | <b>1844</b>   |
| AGRP     | -1,949704 | -0,666977 | <b>-1,3083405</b> | 1730 | 2114 | <b>1922</b>   |
| CYB5D2   | -1,612181 | -1,004131 | <b>-1,308156</b>  | 1558 | 1791 | <b>1674,5</b> |
| LRRC8B   | -1,307812 | NaN       | <b>-1,307812</b>  | 2446 | NaN  | <b>2446</b>   |
| IL17RA   | -0,296233 | -2,318437 | <b>-1,307335</b>  | 1623 | 2565 | <b>2094</b>   |
| MAN2A1   | -1,486795 | -1,126924 | <b>-1,3068595</b> | 968  | 2188 | <b>1578</b>   |
| TCTN3    | -1,306507 | NaN       | <b>-1,306507</b>  | 1643 | NaN  | <b>1643</b>   |
| CRCP     | -1,306297 | NaN       | <b>-1,306297</b>  | 1812 | NaN  | <b>1812</b>   |
| NIM1     | -2,249458 | -0,363071 | <b>-1,3062645</b> | 1943 | 1594 | <b>1768,5</b> |
| COMMD5   | -0,86379  | -1,748046 | <b>-1,305918</b>  | 1845 | 1790 | <b>1817,5</b> |
| ACTL7A   | -1,305782 | NaN       | <b>-1,305782</b>  | 1246 | NaN  | <b>1246</b>   |
| WDR25    | -1,305277 | NaN       | <b>-1,305277</b>  | 1474 | NaN  | <b>1474</b>   |
| NLE1     | -1,535447 | -1,074595 | <b>-1,305021</b>  | 777  | 1901 | <b>1339</b>   |
| ACP2     | -1,344158 | -1,264166 | <b>-1,304162</b>  | 652  | 1354 | <b>1003</b>   |
| SEC63    | -1,521791 | -1,085247 | <b>-1,303519</b>  | 1449 | 1625 | <b>1537</b>   |
| BTD      | -1,55787  | -1,048501 | <b>-1,3031855</b> | 1517 | 2552 | <b>2034,5</b> |
| MYOD1    | -0,855787 | -1,750166 | <b>-1,3029765</b> | 2100 | 2225 | <b>2162,5</b> |
| EPHA4    | -1,317172 | -1,288049 | <b>-1,3026105</b> | 982  | 2055 | <b>1518,5</b> |
| LRRC47   | -1,604248 | -0,999541 | <b>-1,3018945</b> | 1772 | 2235 | <b>2003,5</b> |
| CDH3     | -1,301446 | NaN       | <b>-1,301446</b>  | 1641 | NaN  | <b>1641</b>   |
| NRIP3    | -1,503636 | -1,098644 | <b>-1,30114</b>   | 1695 | 3068 | <b>2381,5</b> |
| AHI1     | -1,300744 | NaN       | <b>-1,300744</b>  | 2190 | NaN  | <b>2190</b>   |
| TRMT2A   | -1,300661 | NaN       | <b>-1,300661</b>  | 1361 | NaN  | <b>1361</b>   |
| EXTL2    | -1,032647 | -1,567701 | <b>-1,300174</b>  | 2088 | 2020 | <b>2054</b>   |
| C2orf84  | -1,299829 | NaN       | <b>-1,299829</b>  | 2132 | NaN  | <b>2132</b>   |
| TMEM38B  | -1,055186 | -1,543706 | <b>-1,299446</b>  | 1881 | 2944 | <b>2412,5</b> |
| SHF      | -1,353383 | -1,245043 | <b>-1,299213</b>  | 1682 | 1607 | <b>1644,5</b> |
| SNX16    | -1,299175 | NaN       | <b>-1,299175</b>  | 1493 | NaN  | <b>1493</b>   |
| DCAF6    | -1,577544 | -1,02051  | <b>-1,299027</b>  | 1224 | 1543 | <b>1383,5</b> |
| NID1     | -1,872382 | -0,72562  | <b>-1,299001</b>  | 2238 | 2233 | <b>2235,5</b> |
| ITGB1BP2 | -1,305238 | -1,292703 | <b>-1,2989705</b> | 1796 | 1514 | <b>1655</b>   |
| ARHGAP24 | -1,54642  | -1,050431 | <b>-1,2984255</b> | 979  | 1423 | <b>1201</b>   |



|         |           |           |                   |      |      |               |
|---------|-----------|-----------|-------------------|------|------|---------------|
| ADCY1   | -1,242227 | -1,354318 | <b>-1,2982725</b> | 1669 | 2391 | <b>2030</b>   |
| MTFP1   | -1,4605   | -1,136031 | <b>-1,2982655</b> | 1340 | 1704 | <b>1522</b>   |
| PRRX1   | -1,103047 | -1,492803 | <b>-1,297925</b>  | 1716 | 2606 | <b>2161</b>   |
| TNFSF10 | -1,107663 | -1,487335 | <b>-1,297499</b>  | 1918 | 1725 | <b>1821,5</b> |
| GPR18   | -1,297317 | NaN       | <b>-1,297317</b>  | 1455 | NaN  | <b>1455</b>   |
| CA5B    | NaN       | -1,297136 | <b>-1,297136</b>  | NaN  | 2590 | <b>2590</b>   |
| MED21   | -1,667812 | -0,925773 | <b>-1,2967925</b> | 912  | 1284 | <b>1098</b>   |
| DMGDH   | -1,103905 | -1,486074 | <b>-1,2949895</b> | 1550 | 2191 | <b>1870,5</b> |
| EFNA2   | -2,26509  | -0,324387 | <b>-1,2947385</b> | 1684 | 2213 | <b>1948,5</b> |
| SPINK8  | -1,93369  | -0,655611 | <b>-1,2946505</b> | 1405 | 2255 | <b>1830</b>   |
| GPR77   | -0,616262 | -1,973029 | <b>-1,2946455</b> | 1297 | 1956 | <b>1626,5</b> |
| HOPX    | -0,834283 | -1,753798 | <b>-1,2940405</b> | 1475 | 1593 | <b>1534</b>   |
| A2LD1   | -1,293876 | NaN       | <b>-1,293876</b>  | 2337 | NaN  | <b>2337</b>   |
| TINAGL1 | -0,813572 | -1,7734   | <b>-1,293486</b>  | 901  | 1489 | <b>1195</b>   |
| CDH15   | -1,012526 | -1,574138 | <b>-1,293332</b>  | 1526 | 2130 | <b>1828</b>   |
| SARS    | -1,545485 | -1,040704 | <b>-1,2930945</b> | 1911 | 2067 | <b>1989</b>   |
| SHB     | -1,158074 | -1,427207 | <b>-1,2926405</b> | 2356 | 2505 | <b>2430,5</b> |
| OR9I1   | -1,760319 | -0,823718 | <b>-1,2920185</b> | 1177 | 1527 | <b>1352</b>   |
| MNS1    | -1,371856 | -1,208769 | <b>-1,2903125</b> | 1117 | 1820 | <b>1468,5</b> |
| HCLS1   | -1,289279 | NaN       | <b>-1,289279</b>  | 1878 | NaN  | <b>1878</b>   |
| ZCCHC3  | -0,411259 | -2,165368 | <b>-1,2883135</b> | 1755 | 1944 | <b>1849,5</b> |
| EIF2S3  | -2,035071 | -0,541091 | <b>-1,288081</b>  | 1402 | 2002 | <b>1702</b>   |
| SMARCA2 | -1,341139 | -1,234796 | <b>-1,2879675</b> | 1003 | 1734 | <b>1368,5</b> |
| PTPLAD1 | -1,287605 | NaN       | <b>-1,287605</b>  | 1616 | NaN  | <b>1616</b>   |
| UGGT2   | -1,387087 | -1,186783 | <b>-1,286935</b>  | 1663 | 2491 | <b>2077</b>   |
| MYCBPAP | -1,286492 | NaN       | <b>-1,286492</b>  | 1787 | NaN  | <b>1787</b>   |
| IQCF2   | -1,286082 | NaN       | <b>-1,286082</b>  | 1147 | NaN  | <b>1147</b>   |
| TPST2   | NaN       | -1,285815 | <b>-1,285815</b>  | NaN  | 3146 | <b>3146</b>   |
| KRIT1   | -1,28506  | NaN       | <b>-1,28506</b>   | 821  | NaN  | <b>821</b>    |
| TRMT6   | -1,388185 | -1,181385 | <b>-1,284785</b>  | 1861 | 3153 | <b>2507</b>   |
| FASTKD1 | -1,283006 | -1,28625  | <b>-1,284628</b>  | 1404 | 2002 | <b>1703</b>   |
| OR5C1   | -1,836537 | -0,73214  | <b>-1,2843385</b> | 1813 | 2465 | <b>2139</b>   |
| GPA33   | -0,985558 | -1,581994 | <b>-1,283776</b>  | 1401 | 2193 | <b>1797</b>   |
| PPP2R5A | -1,264738 | -1,302139 | <b>-1,2834385</b> | 1648 | 2124 | <b>1886</b>   |

|           |           |           |                   |      |      |               |
|-----------|-----------|-----------|-------------------|------|------|---------------|
| GLT1D1    | -1,346157 | -1,217427 | <b>-1,281792</b>  | 1451 | 2019 | <b>1735</b>   |
| PCID2     | -1,281432 | NaN       | <b>-1,281432</b>  | 1603 | NaN  | <b>1603</b>   |
| C6orf120  | -1,281291 | NaN       | <b>-1,281291</b>  | 1849 | NaN  | <b>1849</b>   |
| PDZD11    | -1,213792 | -1,347469 | <b>-1,2806305</b> | 1796 | 1985 | <b>1890,5</b> |
| C16orf87  | -1,362897 | -1,197185 | <b>-1,280041</b>  | 1826 | 1981 | <b>1903,5</b> |
| ODF3B     | -1,211086 | -1,348399 | <b>-1,2797425</b> | 1332 | 1720 | <b>1526</b>   |
| ZNF573    | -1,357184 | -1,202233 | <b>-1,2797085</b> | 968  | 824  | <b>896</b>    |
| RAB18     | -1,87521  | -0,683609 | <b>-1,2794095</b> | 1622 | 1813 | <b>1717,5</b> |
| RAB40C    | -1,41975  | -1,13855  | <b>-1,27915</b>   | 1425 | 2189 | <b>1807</b>   |
| ALAS2     | -1,50905  | -1,048379 | <b>-1,2787145</b> | 492  | 1368 | <b>930</b>    |
| BICD2     | -1,953225 | -0,60344  | <b>-1,2783325</b> | 1741 | 1734 | <b>1737,5</b> |
| SERPINA13 | -1,27818  | NaN       | <b>-1,27818</b>   | 1759 | NaN  | <b>1759</b>   |
| CLP1      | -1,169083 | -1,38641  | <b>-1,2777465</b> | 1687 | 2130 | <b>1908,5</b> |
| KIAA1143  | -1,277707 | NaN       | <b>-1,277707</b>  | 1391 | NaN  | <b>1391</b>   |
| SLC5A9    | -1,062694 | -1,491547 | <b>-1,2771205</b> | 1120 | 2349 | <b>1734,5</b> |
| AMBN      | -1,318166 | -1,236056 | <b>-1,277111</b>  | 1673 | 2140 | <b>1906,5</b> |
| PNMT      | -1,15505  | -1,399164 | <b>-1,277107</b>  | 1323 | 2040 | <b>1681,5</b> |
| DAB2      | -1,326272 | -1,226322 | <b>-1,276297</b>  | 1314 | 1274 | <b>1294</b>   |
| IL1RAPL1  | -1,770766 | -0,781539 | <b>-1,2761525</b> | 1578 | 1988 | <b>1783</b>   |
| TMC3      | -1,094583 | -1,457341 | <b>-1,275962</b>  | 1962 | 2224 | <b>2093</b>   |
| PEX7      | -1,249746 | -1,301992 | <b>-1,275869</b>  | 1250 | 1423 | <b>1336,5</b> |
| KDM1B     | -1,817758 | -0,732128 | <b>-1,274943</b>  | 1199 | 1468 | <b>1333,5</b> |
| BAG5      | -1,170104 | -1,37895  | <b>-1,274527</b>  | 1592 | 1876 | <b>1734</b>   |
| ABI3BP    | -1,273658 | NaN       | <b>-1,273658</b>  | 1715 | NaN  | <b>1715</b>   |
| STX19     | -1,273219 | NaN       | <b>-1,273219</b>  | 1558 | NaN  | <b>1558</b>   |
| FSIP1     | -0,787322 | -1,757938 | <b>-1,27263</b>   | 1436 | 1866 | <b>1651</b>   |
| PLIN3     | -0,979133 | -1,566081 | <b>-1,272607</b>  | 1397 | 2188 | <b>1792,5</b> |
| NYNRIN    | -1,141854 | -1,402553 | <b>-1,2722035</b> | 1215 | 1423 | <b>1319</b>   |
| CAST      | -1,102312 | -1,441079 | <b>-1,2716955</b> | 1776 | 2047 | <b>1911,5</b> |
| SMAD2     | -0,285546 | -2,257754 | <b>-1,27165</b>   | 1814 | 1976 | <b>1895</b>   |
| ARSF      | -1,324536 | -1,217574 | <b>-1,271055</b>  | 1409 | 1831 | <b>1620</b>   |
| ADRA2C    | -1,270683 | NaN       | <b>-1,270683</b>  | 1971 | NaN  | <b>1971</b>   |
| CEACAM3   | -1,270207 | NaN       | <b>-1,270207</b>  | 1222 | NaN  | <b>1222</b>   |
| HSPA2     | -0,691821 | -1,847677 | <b>-1,269749</b>  | 1527 | 2208 | <b>1867,5</b> |

|           |           |           |                   |      |      |               |
|-----------|-----------|-----------|-------------------|------|------|---------------|
| RAB10     | -1,100762 | -1,437781 | <b>-1,2692715</b> | 1538 | 2009 | <b>1773,5</b> |
| POU4F3    | -1,07166  | -1,466512 | <b>-1,269086</b>  | 1292 | 1418 | <b>1355</b>   |
| GABRD     | -1,411636 | -1,125922 | <b>-1,268779</b>  | 1362 | 2154 | <b>1758</b>   |
| PUSL1     | -1,404579 | -1,132852 | <b>-1,2687155</b> | 898  | 1500 | <b>1199</b>   |
| LUZP4     | -1,268456 | NaN       | <b>-1,268456</b>  | 1705 | NaN  | <b>1705</b>   |
| ZWILCH    | -2,244696 | -0,291895 | <b>-1,2682955</b> | 1796 | 1395 | <b>1595,5</b> |
| HYOU1     | -1,80765  | -0,726818 | <b>-1,267234</b>  | 1729 | 2404 | <b>2066,5</b> |
| NDUFB10   | NaN       | -1,267119 | <b>-1,267119</b>  | NaN  | 2339 | <b>2339</b>   |
| C21orf56  | -1,439164 | -1,094936 | <b>-1,26705</b>   | 1163 | 1776 | <b>1469,5</b> |
| CXCL9     | -1,581737 | -0,951826 | <b>-1,2667815</b> | 851  | 1830 | <b>1340,5</b> |
| KDELC2    | -1,934833 | -0,59846  | <b>-1,2666465</b> | 1362 | 883  | <b>1122,5</b> |
| PRSS48    | -1,067314 | -1,465462 | <b>-1,266388</b>  | 1229 | 1783 | <b>1506</b>   |
| LSS       | -1,23074  | -1,301025 | <b>-1,2658825</b> | 1705 | 1903 | <b>1804</b>   |
| FAM54B    | -1,986821 | -0,544416 | <b>-1,2656185</b> | 1718 | 2067 | <b>1892,5</b> |
| GIGYF2    | -1,038557 | -1,491789 | <b>-1,265173</b>  | 1404 | 2066 | <b>1735</b>   |
| ZBTB38    | -1,812047 | -0,717834 | <b>-1,2649405</b> | 1027 | 1259 | <b>1143</b>   |
| SLC30A3   | -0,643647 | -1,885062 | <b>-1,2643545</b> | 1295 | 1958 | <b>1626,5</b> |
| TMEM102   | -1,584399 | -0,943934 | <b>-1,2641665</b> | 1663 | 2190 | <b>1926,5</b> |
| IL2RB     | -1,600564 | -0,926997 | <b>-1,2637805</b> | 2035 | 2202 | <b>2118,5</b> |
| RPN2      | -1,417109 | -1,109756 | <b>-1,2634325</b> | 1507 | 1839 | <b>1673</b>   |
| FBXO41    | -1,469965 | -1,056657 | <b>-1,263311</b>  | 1297 | 1480 | <b>1388,5</b> |
| PNPO      | -1,689434 | -0,832583 | <b>-1,2610085</b> | 1691 | 2104 | <b>1897,5</b> |
| SCGB1D1   | -1,632297 | -0,889078 | <b>-1,2606875</b> | 1793 | 2244 | <b>2018,5</b> |
| DBC1      | -1,025774 | -1,495581 | <b>-1,2606775</b> | 1503 | 2058 | <b>1780,5</b> |
| FANCE     | -1,334977 | -1,18614  | <b>-1,2605585</b> | 443  | 1637 | <b>1040</b>   |
| FIZ1      | -0,793398 | -1,727254 | <b>-1,260326</b>  | 1505 | 2054 | <b>1779,5</b> |
| C10orf131 | -1,260255 | NaN       | <b>-1,260255</b>  | 1406 | NaN  | <b>1406</b>   |
| VDAC3     | -1,394502 | -1,125191 | <b>-1,2598465</b> | 2050 | 2620 | <b>2335</b>   |
| ABCA9     | -1,71573  | -0,803312 | <b>-1,259521</b>  | 1602 | 2608 | <b>2105</b>   |
| TAOK1     | -1,453336 | -1,065539 | <b>-1,2594375</b> | 1783 | 2281 | <b>2032</b>   |
| OR10A2    | -1,675184 | -0,843542 | <b>-1,259363</b>  | 610  | 1319 | <b>964,5</b>  |
| EXOC2     | -1,259322 | NaN       | <b>-1,259322</b>  | 1878 | NaN  | <b>1878</b>   |
| CPN2      | -0,729555 | -1,788864 | <b>-1,2592095</b> | 1711 | 1779 | <b>1745</b>   |
| FIGNL1    | -1,258735 | NaN       | <b>-1,258735</b>  | 1777 | NaN  | <b>1777</b>   |

|            |           |           |                   |      |      |               |
|------------|-----------|-----------|-------------------|------|------|---------------|
| SHROOM4    | -0,859813 | -1,656987 | <b>-1,2584</b>    | 1812 | 2575 | <b>2193,5</b> |
| WDR45L     | -1,570044 | -0,946481 | <b>-1,2582625</b> | 1736 | 2740 | <b>2238</b>   |
| CRIPAK     | -1,258218 | NaN       | <b>-1,258218</b>  | 1392 | NaN  | <b>1392</b>   |
| HMX2       | -1,050246 | -1,465702 | <b>-1,257974</b>  | 1489 | 1866 | <b>1677,5</b> |
| COX19      | -0,839807 | -1,675369 | <b>-1,257588</b>  | 1894 | 2195 | <b>2044,5</b> |
| OR2T6      | -1,257228 | NaN       | <b>-1,257228</b>  | 1601 | NaN  | <b>1601</b>   |
| CCDC87     | -1,129625 | -1,384476 | <b>-1,2570505</b> | 2070 | 2920 | <b>2495</b>   |
| SYAP1      | -1,2673   | -1,246754 | <b>-1,257027</b>  | 1409 | 2787 | <b>2098</b>   |
| PLAGL1     | -1,265451 | -1,246379 | <b>-1,255915</b>  | 1202 | 2060 | <b>1631</b>   |
| ZNF791     | -1,421514 | -1,089923 | <b>-1,2557185</b> | 1357 | 2043 | <b>1700</b>   |
| C3orf64    | -1,357628 | -1,152602 | <b>-1,255115</b>  | 1642 | 2128 | <b>1885</b>   |
| PRKG1      | -1,746961 | -0,763225 | <b>-1,255093</b>  | 2310 | 2225 | <b>2267,5</b> |
| TLE6       | -1,734401 | -0,77569  | <b>-1,2550455</b> | 1052 | 1652 | <b>1352</b>   |
| KCNC4      | -0,955152 | -1,55196  | <b>-1,253556</b>  | 1371 | 2364 | <b>1867,5</b> |
| RAPGEFL1   | -1,656208 | -0,850471 | <b>-1,2533395</b> | 1950 | 2102 | <b>2026</b>   |
| TYSND1     | -1,68685  | -0,819631 | <b>-1,2532405</b> | 2155 | 2077 | <b>2116</b>   |
| ESD        | -1,372433 | -1,132609 | <b>-1,252521</b>  | 1343 | 1762 | <b>1552,5</b> |
| SES2       | -0,503267 | -2,001649 | <b>-1,252458</b>  | 2078 | 3521 | <b>2799,5</b> |
| FAM187B    | -1,252324 | NaN       | <b>-1,252324</b>  | 2038 | NaN  | <b>2038</b>   |
| PDE6D      | -1,967946 | -0,536449 | <b>-1,2521975</b> | 1165 | 1705 | <b>1435</b>   |
| MAP2K6     | -1,359688 | -1,144228 | <b>-1,251958</b>  | 1766 | 1923 | <b>1844,5</b> |
| STX4       | -0,928877 | -1,574849 | <b>-1,251863</b>  | 1524 | 1946 | <b>1735</b>   |
| PACSIN3    | -0,811547 | -1,691996 | <b>-1,2517715</b> | 1640 | 1927 | <b>1783,5</b> |
| FZD8       | -1,251492 | NaN       | <b>-1,251492</b>  | 1724 | NaN  | <b>1724</b>   |
| COL19A1    | -1,056485 | -1,445931 | <b>-1,251208</b>  | 1825 | 1864 | <b>1844,5</b> |
| RBM12      | -1,613633 | -0,887838 | <b>-1,2507355</b> | 1646 | 1734 | <b>1690</b>   |
| NAA50      | -1,777174 | -0,723228 | <b>-1,250201</b>  | 1376 | 1549 | <b>1462,5</b> |
| KCNQ2      | -1,583266 | -0,91682  | <b>-1,250043</b>  | 956  | 2268 | <b>1612</b>   |
| WAC        | -1,055228 | -1,44335  | <b>-1,249289</b>  | 1734 | 2032 | <b>1883</b>   |
| PRKAR1A    | -1,840104 | -0,658444 | <b>-1,249274</b>  | 1182 | 1542 | <b>1362</b>   |
| CDKN2AIPNL | -1,249258 | NaN       | <b>-1,249258</b>  | 1224 | NaN  | <b>1224</b>   |
| PCYT2      | -0,967886 | -1,530174 | <b>-1,24903</b>   | 1993 | 2406 | <b>2199,5</b> |
| ATP5L      | -1,422694 | -1,075094 | <b>-1,248894</b>  | 1498 | 1859 | <b>1678,5</b> |
| HEBP2      | -0,98517  | -1,511603 | <b>-1,2483865</b> | 1530 | 2028 | <b>1779</b>   |

|           |           |           |                   |      |      |               |
|-----------|-----------|-----------|-------------------|------|------|---------------|
| OR52D1    | -1,248128 | NaN       | <b>-1,248128</b>  | 1555 | NaN  | <b>1555</b>   |
| LSAMP     | -1,436677 | -1,059545 | <b>-1,248111</b>  | 1645 | 1900 | <b>1772,5</b> |
| KIFC3     | -1,031099 | -1,464685 | <b>-1,247892</b>  | 1131 | 1394 | <b>1262,5</b> |
| DPT       | -1,495397 | -0,999352 | <b>-1,2473745</b> | 834  | 1066 | <b>950</b>    |
| PSG11     | -0,728402 | -1,766136 | <b>-1,247269</b>  | 1076 | 1432 | <b>1254</b>   |
| HCAR1     | -1,24618  | NaN       | <b>-1,24618</b>   | 1469 | NaN  | <b>1469</b>   |
| CYP8B1    | -1,288409 | -1,203917 | <b>-1,246163</b>  | 1351 | 2118 | <b>1734,5</b> |
| STOM      | -1,245909 | NaN       | <b>-1,245909</b>  | 1656 | NaN  | <b>1656</b>   |
| KIAA1310  | -0,976165 | -1,515497 | <b>-1,245831</b>  | 1540 | 2327 | <b>1933,5</b> |
| VWA2      | -1,245622 | NaN       | <b>-1,245622</b>  | 1313 | NaN  | <b>1313</b>   |
| MICAL1    | -1,24561  | NaN       | <b>-1,24561</b>   | 1665 | NaN  | <b>1665</b>   |
| VBP1      | -1,46028  | -1,030606 | <b>-1,245443</b>  | 1542 | 1649 | <b>1595,5</b> |
| C19orf73  | 0,292889  | -2,783309 | <b>-1,24521</b>   | 1993 | 2330 | <b>2161,5</b> |
| SEMA4F    | -0,935619 | -1,554505 | <b>-1,245062</b>  | 1397 | 2073 | <b>1735</b>   |
| GPCPD1    | -1,437975 | -1,051435 | <b>-1,244705</b>  | 1879 | 2030 | <b>1954,5</b> |
| AKAP6     | -1,434982 | -1,054067 | <b>-1,2445245</b> | 2209 | 2709 | <b>2459</b>   |
| UBA2      | -0,566884 | -1,921721 | <b>-1,2443025</b> | 1955 | 1954 | <b>1954,5</b> |
| DPP4      | -1,779497 | -0,709016 | <b>-1,2442565</b> | 1808 | 2334 | <b>2071</b>   |
| GRM2      | -1,243621 | NaN       | <b>-1,243621</b>  | 786  | NaN  | <b>786</b>    |
| SERPINA4  | -0,751088 | -1,735956 | <b>-1,243522</b>  | 1283 | 1952 | <b>1617,5</b> |
| IGFBP6    | -0,931323 | -1,554724 | <b>-1,2430235</b> | 1267 | 2359 | <b>1813</b>   |
| SNX31     | -1,242367 | NaN       | <b>-1,242367</b>  | 1601 | NaN  | <b>1601</b>   |
| ID3       | -1,629283 | -0,854589 | <b>-1,241936</b>  | 1196 | 1984 | <b>1590</b>   |
| VPS18     | -2,200368 | -0,283263 | <b>-1,2418155</b> | 1988 | 2613 | <b>2300,5</b> |
| C11orf1   | -1,699925 | -0,783634 | <b>-1,2417795</b> | 1816 | 2725 | <b>2270,5</b> |
| NHS       | -1,394461 | -1,088    | <b>-1,2412305</b> | 1514 | 2113 | <b>1813,5</b> |
| CDKL1     | -1,270441 | -1,211128 | <b>-1,2407845</b> | 1429 | 2313 | <b>1871</b>   |
| ZNF673    | -1,240516 | NaN       | <b>-1,240516</b>  | 1647 | NaN  | <b>1647</b>   |
| TMPRSS11D | -1,461407 | -1,018143 | <b>-1,239775</b>  | 1270 | 1462 | <b>1366</b>   |
| MMP27     | -1,680997 | -0,798249 | <b>-1,239623</b>  | 1408 | 1982 | <b>1695</b>   |
| BRAF      | -1,361964 | -1,116583 | <b>-1,2392735</b> | 1577 | 2463 | <b>2020</b>   |
| TMEM17    | -1,455322 | -1,022778 | <b>-1,23905</b>   | 1550 | 2173 | <b>1861,5</b> |
| FSHB      | -1,019076 | -1,458291 | <b>-1,2386835</b> | 1498 | 1952 | <b>1725</b>   |
| GOSR1     | -1,713955 | -0,763157 | <b>-1,238556</b>  | 1420 | 1595 | <b>1507,5</b> |

|         |           |           |                   |      |      |               |
|---------|-----------|-----------|-------------------|------|------|---------------|
| ITSN2   | -1,238195 | NaN       | <b>-1,238195</b>  | 1230 | NaN  | <b>1230</b>   |
| BCLAF1  | -1,932495 | -0,543561 | <b>-1,238028</b>  | 2142 | 2114 | <b>2128</b>   |
| PCDHA11 | -1,237435 | NaN       | <b>-1,237435</b>  | 1806 | NaN  | <b>1806</b>   |
| LRRC6   | -1,700921 | -0,773813 | <b>-1,237367</b>  | 1738 | 1863 | <b>1800,5</b> |
| SPRR4   | -1,456503 | -1,01806  | <b>-1,2372815</b> | 1260 | 2006 | <b>1633</b>   |
| TAF7    | -1,35379  | -1,12002  | <b>-1,236905</b>  | 1031 | 1918 | <b>1474,5</b> |
| PTCD3   | -1,236551 | NaN       | <b>-1,236551</b>  | 1497 | NaN  | <b>1497</b>   |
| KLK13   | -1,76045  | -0,711162 | <b>-1,235806</b>  | 1309 | 2036 | <b>1672,5</b> |
| UBE2QL1 | -0,666479 | -1,805115 | <b>-1,235797</b>  | 1457 | 2682 | <b>2069,5</b> |
| KCNK18  | -1,960985 | -0,509687 | <b>-1,235336</b>  | 2285 | 3097 | <b>2691</b>   |
| AKR1B15 | -1,679904 | -0,789798 | <b>-1,234851</b>  | 1749 | 2701 | <b>2225</b>   |
| MBOAT7  | -1,536519 | -0,933021 | <b>-1,23477</b>   | 1405 | 1938 | <b>1671,5</b> |
| VPS39   | -1,23458  | NaN       | <b>-1,23458</b>   | 1235 | NaN  | <b>1235</b>   |
| ESM1    | -1,212134 | -1,257002 | <b>-1,234568</b>  | 1216 | 1396 | <b>1306</b>   |
| KCNK2   | -0,962448 | -1,506486 | <b>-1,234467</b>  | 1546 | 2347 | <b>1946,5</b> |
| MOBKL2B | -1,21833  | -1,249977 | <b>-1,2341535</b> | 1512 | 2478 | <b>1995</b>   |
| OR5M9   | -1,233462 | NaN       | <b>-1,233462</b>  | 1919 | NaN  | <b>1919</b>   |
| BTG3    | -1,233272 | NaN       | <b>-1,233272</b>  | 1966 | NaN  | <b>1966</b>   |
| ZNF124  | -0,319996 | -2,143454 | <b>-1,231725</b>  | 1630 | 2451 | <b>2040,5</b> |
| HOXC10  | -1,557242 | -0,906098 | <b>-1,23167</b>   | 1461 | 1968 | <b>1714,5</b> |
| ATP8B3  | -1,371126 | -1,091451 | <b>-1,2312885</b> | 1708 | 1890 | <b>1799</b>   |
| SHCBP1  | -0,554302 | -1,908016 | <b>-1,231159</b>  | 1559 | 2616 | <b>2087,5</b> |
| TRPC3   | -1,867758 | -0,593936 | <b>-1,230847</b>  | 1254 | 2050 | <b>1652</b>   |
| SEC22B  | -1,507916 | -0,953269 | <b>-1,2305925</b> | 1754 | 2045 | <b>1899,5</b> |
| ANKS3   | -1,230217 | NaN       | <b>-1,230217</b>  | 1231 | NaN  | <b>1231</b>   |
| SLC44A4 | -1,86618  | -0,593424 | <b>-1,229802</b>  | 1533 | 1665 | <b>1599</b>   |
| PPP1R1A | -0,532933 | -1,926308 | <b>-1,2296205</b> | 1312 | 1914 | <b>1613</b>   |
| LMF2    | -1,520982 | -0,937773 | <b>-1,2293775</b> | 1904 | 2603 | <b>2253,5</b> |
| RSBN1L  | -0,560862 | -1,897841 | <b>-1,2293515</b> | 1928 | 2633 | <b>2280,5</b> |
| IFFO2   | -0,903072 | -1,554931 | <b>-1,2290015</b> | 1478 | 2145 | <b>1811,5</b> |
| CTDP1   | -1,267259 | -1,186613 | <b>-1,226936</b>  | 1457 | 2102 | <b>1779,5</b> |
| OR4L1   | -0,545862 | -1,907138 | <b>-1,2265</b>    | 1488 | 1832 | <b>1660</b>   |
| AMOT    | -0,932964 | -1,519959 | <b>-1,2264615</b> | 1314 | 2045 | <b>1679,5</b> |
| PCDHB9  | -1,697955 | -0,753255 | <b>-1,225605</b>  | 1509 | 1790 | <b>1649,5</b> |

|           |           |           |                   |      |      |               |
|-----------|-----------|-----------|-------------------|------|------|---------------|
| SFXN3     | -1,734446 | -0,716719 | <b>-1,2255825</b> | 1345 | 1649 | <b>1497</b>   |
| OR2B6     | -1,224309 | NaN       | <b>-1,224309</b>  | 1986 | NaN  | <b>1986</b>   |
| TMPRSS11A | -0,036493 | -2,411152 | <b>-1,2238225</b> | 1616 | 2265 | <b>1940,5</b> |
| UBTF      | NaN       | -1,223306 | <b>-1,223306</b>  | NaN  | 1531 | <b>1531</b>   |
| FOS       | -1,034861 | -1,411668 | <b>-1,2232645</b> | 1045 | 1322 | <b>1183,5</b> |
| CYBB      | -0,33058  | -2,115933 | <b>-1,2232565</b> | 1902 | 2314 | <b>2108</b>   |
| MAP2K7    | -0,723081 | -1,722808 | <b>-1,2229445</b> | 1424 | 1505 | <b>1464,5</b> |
| MARGPRE   | -0,965428 | -1,480306 | <b>-1,222867</b>  | 1848 | 1719 | <b>1783,5</b> |
| SMAD7     | -1,339571 | -1,103434 | <b>-1,2215025</b> | 1490 | 2029 | <b>1759,5</b> |
| FGFR4     | -1,583822 | -0,859124 | <b>-1,221473</b>  | 1216 | 2190 | <b>1703</b>   |
| ARL4C     | -0,930219 | -1,512339 | <b>-1,221279</b>  | 1914 | 3139 | <b>2526,5</b> |
| OR4K15    | 0,004943  | -2,446362 | <b>-1,2207095</b> | 1682 | 1977 | <b>1829,5</b> |
| FAM3C     | -2,115257 | -0,325653 | <b>-1,220455</b>  | 1659 | 2868 | <b>2263,5</b> |
| CCDC102A  | -1,079433 | -1,358444 | <b>-1,2189385</b> | 1931 | 2233 | <b>2082</b>   |
| CCND2     | -1,08054  | -1,357036 | <b>-1,218788</b>  | 1535 | 1532 | <b>1533,5</b> |
| TAAR8     | -1,218781 | NaN       | <b>-1,218781</b>  | 1457 | NaN  | <b>1457</b>   |
| MXI1      | -1,541166 | -0,894781 | <b>-1,2179735</b> | 1470 | 2061 | <b>1765,5</b> |
| GLTPD2    | -1,029648 | -1,406285 | <b>-1,2179665</b> | 1404 | 2243 | <b>1823,5</b> |
| CYP1A1    | -0,930973 | -1,503442 | <b>-1,2172075</b> | 1655 | 2439 | <b>2047</b>   |
| SMOC2     | -1,631981 | -0,801632 | <b>-1,2168065</b> | 1423 | 1880 | <b>1651,5</b> |
| USP19     | -1,046743 | -1,386138 | <b>-1,2164405</b> | 1072 | 1544 | <b>1308</b>   |
| SULT1C3   | -0,696996 | -1,735726 | <b>-1,216361</b>  | 1912 | 2586 | <b>2249</b>   |
| ELF2      | -1,16588  | -1,263977 | <b>-1,2149285</b> | 1876 | 2380 | <b>2128</b>   |
| BPIFB4    | -1,077543 | -1,352    | <b>-1,2147715</b> | 1174 | 1800 | <b>1487</b>   |
| TOP1      | -1,2462   | -1,180549 | <b>-1,2133745</b> | 1117 | 1206 | <b>1161,5</b> |
| CRLF2     | -0,815564 | -1,611059 | <b>-1,2133115</b> | 966  | 1943 | <b>1454,5</b> |
| CCL28     | -0,558867 | -1,867648 | <b>-1,2132575</b> | 1898 | 1459 | <b>1678,5</b> |
| PGRMC1    | -1,272852 | -1,152014 | <b>-1,212433</b>  | 1126 | 1935 | <b>1530,5</b> |
| PLDN      | -1,748031 | -0,676377 | <b>-1,212204</b>  | 1780 | 2108 | <b>1944</b>   |
| AVPR1B    | -1,211804 | NaN       | <b>-1,211804</b>  | 1885 | NaN  | <b>1885</b>   |
| JUNB      | -1,208379 | -1,215118 | <b>-1,2117485</b> | 1724 | 2103 | <b>1913,5</b> |
| SIGLEC8   | -1,087125 | -1,335416 | <b>-1,2112705</b> | 1675 | 2415 | <b>2045</b>   |
| PLXNA3    | -1,37924  | -1,043187 | <b>-1,2112135</b> | 1245 | 1743 | <b>1494</b>   |
| OR10K1    | -1,50989  | -0,91107  | <b>-1,21048</b>   | 1630 | 1850 | <b>1740</b>   |

|          |           |           |                   |      |      |               |
|----------|-----------|-----------|-------------------|------|------|---------------|
| MKL1     | -1,801068 | -0,61954  | <b>-1,210304</b>  | 1617 | 2139 | <b>1878</b>   |
| MMS19    | -1,141766 | -1,278762 | <b>-1,210264</b>  | 1730 | 2289 | <b>2009,5</b> |
| PXDN     | -1,022707 | -1,397552 | <b>-1,2101295</b> | 1860 | 2686 | <b>2273</b>   |
| ZNF519   | -1,498985 | -0,920406 | <b>-1,2096955</b> | 1835 | 1983 | <b>1909</b>   |
| KNG1     | -1,264365 | -1,15457  | <b>-1,2094675</b> | 1627 | 2068 | <b>1847,5</b> |
| CNTN2    | -1,20929  | NaN       | <b>-1,20929</b>   | 1941 | NaN  | <b>1941</b>   |
| GLMN     | -1,282471 | -1,135332 | <b>-1,2089015</b> | 1130 | 1602 | <b>1366</b>   |
| TRIL     | -1,567985 | -0,847943 | <b>-1,207964</b>  | 1567 | 2250 | <b>1908,5</b> |
| OR1B1    | -1,207754 | NaN       | <b>-1,207754</b>  | 1524 | NaN  | <b>1524</b>   |
| ZDHHC2   | -1,909332 | -0,505647 | <b>-1,2074895</b> | 1330 | 1781 | <b>1555,5</b> |
| GABRB3   | -1,328614 | -1,085609 | <b>-1,2071115</b> | 1286 | 2516 | <b>1901</b>   |
| DLGAP1   | -1,996444 | -0,417629 | <b>-1,2070365</b> | 1261 | 1233 | <b>1247</b>   |
| KIAA0528 | -1,351759 | -1,06191  | <b>-1,2068345</b> | 1962 | 2271 | <b>2116,5</b> |
| GGCT     | -2,062299 | -0,351256 | <b>-1,2067775</b> | 1202 | 1581 | <b>1391,5</b> |
| TUBE1    | -1,747031 | -0,665951 | <b>-1,206491</b>  | 1715 | 2359 | <b>2037</b>   |
| ZBTB25   | -1,206428 | NaN       | <b>-1,206428</b>  | 2019 | NaN  | <b>2019</b>   |
| FLVCR2   | -1,574163 | -0,837924 | <b>-1,2060435</b> | 1460 | 1864 | <b>1662</b>   |
| VIM      | -1,049875 | -1,362057 | <b>-1,205966</b>  | 1009 | 1111 | <b>1060</b>   |
| OLR1     | -1,740117 | -0,671511 | <b>-1,205814</b>  | 2160 | 2260 | <b>2210</b>   |
| COG2     | -1,503533 | -0,907671 | <b>-1,205602</b>  | 1540 | 1989 | <b>1764,5</b> |
| UGT2B7   | -1,828463 | -0,581033 | <b>-1,204748</b>  | 1914 | 2646 | <b>2280</b>   |
| EXO1     | -1,180778 | -1,227064 | <b>-1,203921</b>  | 1981 | 2824 | <b>2402,5</b> |
| CYTH1    | -1,26446  | -1,141057 | <b>-1,2027585</b> | 556  | 1316 | <b>936</b>    |
| DCAF12L1 | -1,75704  | -0,647722 | <b>-1,202381</b>  | 1256 | 1854 | <b>1555</b>   |
| SLC40A1  | -0,857212 | -1,547446 | <b>-1,202329</b>  | 1734 | 2320 | <b>2027</b>   |
| XRCC3    | -0,901107 | -1,502778 | <b>-1,2019425</b> | 1289 | 1712 | <b>1500,5</b> |
| TBC1D23  | -1,201072 | NaN       | <b>-1,201072</b>  | 1749 | NaN  | <b>1749</b>   |
| LETM1    | -1,11549  | -1,284272 | <b>-1,199881</b>  | 1320 | 1670 | <b>1495</b>   |
| SLC43A2  | -0,943693 | -1,455752 | <b>-1,1997225</b> | 1729 | 1917 | <b>1823</b>   |
| CNNM2    | -1,199466 | NaN       | <b>-1,199466</b>  | 1272 | NaN  | <b>1272</b>   |
| JAK1     | -1,483095 | -0,915098 | <b>-1,1990965</b> | 2057 | 2274 | <b>2165,5</b> |
| REEP3    | -1,714607 | -0,682373 | <b>-1,19849</b>   | 1578 | 2378 | <b>1978</b>   |
| CACNG3   | -0,731018 | -1,665369 | <b>-1,1981935</b> | 1595 | 2705 | <b>2150</b>   |
| TXLNB    | -1,197631 | NaN       | <b>-1,197631</b>  | 1596 | NaN  | <b>1596</b>   |



|          |           |           |                   |      |      |               |
|----------|-----------|-----------|-------------------|------|------|---------------|
| RPP14    | -1,973678 | -0,419187 | <b>-1,1964325</b> | 1609 | 1480 | <b>1544,5</b> |
| PPPDE2   | -1,086649 | -1,305907 | <b>-1,196278</b>  | 1534 | 2012 | <b>1773</b>   |
| OSR1     | -1,084639 | -1,307907 | <b>-1,196273</b>  | 1651 | 1875 | <b>1763</b>   |
| ATP6V0A1 | -1,678152 | -0,714304 | <b>-1,196228</b>  | 1606 | 2289 | <b>1947,5</b> |
| PSCA     | -1,554581 | -0,837458 | <b>-1,1960195</b> | 1655 | 1894 | <b>1774,5</b> |
| RAB30    | -1,166793 | -1,221046 | <b>-1,1939195</b> | 2072 | 2382 | <b>2227</b>   |
| SLC29A3  | -1,294915 | -1,091999 | <b>-1,193457</b>  | 1993 | 2095 | <b>2044</b>   |
| BOLL     | -1,344422 | -1,041508 | <b>-1,192965</b>  | 1879 | 2579 | <b>2229</b>   |
| FBXO39   | -1,299644 | -1,086218 | <b>-1,192931</b>  | 2098 | 2492 | <b>2295</b>   |
| TRPM7    | -1,549109 | -0,836515 | <b>-1,192812</b>  | 1748 | 2222 | <b>1985</b>   |
| DCAF17   | -1,319428 | -1,065942 | <b>-1,192685</b>  | 1430 | 2170 | <b>1800</b>   |
| LHCGR    | -1,192583 | NaN       | <b>-1,192583</b>  | 1594 | NaN  | <b>1594</b>   |
| TJAP1    | -1,192218 | NaN       | <b>-1,192218</b>  | 1297 | NaN  | <b>1297</b>   |
| C15orf57 | -1,192071 | NaN       | <b>-1,192071</b>  | 1446 | NaN  | <b>1446</b>   |
| EYS      | -1,634095 | -0,749896 | <b>-1,1919955</b> | 2090 | 3127 | <b>2608,5</b> |
| BCL2     | -1,234969 | -1,148683 | <b>-1,191826</b>  | 868  | 1175 | <b>1021,5</b> |
| SLC29A2  | NaN       | -1,191822 | <b>-1,191822</b>  | NaN  | 3160 | <b>3160</b>   |
| TM7SF4   | -1,31222  | -1,066823 | <b>-1,1895215</b> | 1845 | 2047 | <b>1946</b>   |
| IFNE     | -1,70511  | -0,672105 | <b>-1,1886075</b> | 1826 | 2770 | <b>2298</b>   |
| BUB1     | -0,971417 | -1,404938 | <b>-1,1881775</b> | 1146 | 1118 | <b>1132</b>   |
| XKRX     | -1,082141 | -1,293964 | <b>-1,1880525</b> | 1340 | 1789 | <b>1564,5</b> |
| METTL21D | -0,755358 | -1,619144 | <b>-1,187251</b>  | 1662 | 2622 | <b>2142</b>   |
| KAT5     | -0,978102 | -1,396378 | <b>-1,18724</b>   | 935  | 1299 | <b>1117</b>   |
| INVS     | -1,375622 | -0,997665 | <b>-1,1866435</b> | 1664 | 2533 | <b>2098,5</b> |
| AGK      | -1,124729 | -1,248549 | <b>-1,186639</b>  | 1570 | 1763 | <b>1666,5</b> |
| CD93     | -1,024758 | -1,348358 | <b>-1,186558</b>  | 1293 | 2023 | <b>1658</b>   |
| TJP3     | -1,499314 | -0,873794 | <b>-1,186554</b>  | 1535 | 1969 | <b>1752</b>   |
| C1orf27  | 0,325367  | -2,697635 | <b>-1,186134</b>  | 1289 | 1677 | <b>1483</b>   |
| CFHR2    | -1,185922 | NaN       | <b>-1,185922</b>  | 1824 | NaN  | <b>1824</b>   |
| IL22RA2  | -1,171559 | -1,199999 | <b>-1,185779</b>  | 1650 | 2388 | <b>2019</b>   |
| RNFT2    | -2,11502  | -0,256356 | <b>-1,185688</b>  | 1769 | 2309 | <b>2039</b>   |
| CCDC126  | -1,025555 | -1,344299 | <b>-1,184927</b>  | 2011 | 2257 | <b>2134</b>   |
| ABI3     | -1,41902  | -0,949907 | <b>-1,1844635</b> | 1583 | 2125 | <b>1854</b>   |
| DAG1     | -0,946041 | -1,422387 | <b>-1,184214</b>  | 982  | 1464 | <b>1223</b>   |

|          |           |           |                   |      |      |               |
|----------|-----------|-----------|-------------------|------|------|---------------|
| OXT      | -1,183915 | NaN       | <b>-1,183915</b>  | 910  | NaN  | <b>910</b>    |
| SORT1    | -0,993884 | -1,373598 | <b>-1,183741</b>  | 1764 | 2044 | <b>1904</b>   |
| ZNF740   | -1,183325 | NaN       | <b>-1,183325</b>  | 1647 | NaN  | <b>1647</b>   |
| RASSF10  | -2,203743 | -0,162045 | <b>-1,182894</b>  | 1618 | 1902 | <b>1760</b>   |
| TAC1     | -1,182676 | NaN       | <b>-1,182676</b>  | 1269 | NaN  | <b>1269</b>   |
| MN1      | -2,503073 | 0,137745  | <b>-1,182664</b>  | 1791 | 2234 | <b>2012,5</b> |
| CNTNAP2  | -1,742222 | -0,621798 | <b>-1,18201</b>   | 1531 | 1846 | <b>1688,5</b> |
| BNIP2    | -1,555513 | -0,808477 | <b>-1,181995</b>  | 1823 | 2361 | <b>2092</b>   |
| CHRND    | -1,42208  | -0,939577 | <b>-1,1808285</b> | 805  | 1783 | <b>1294</b>   |
| HERC3    | -1,022271 | -1,339139 | <b>-1,180705</b>  | 1637 | 2379 | <b>2008</b>   |
| KBTBD6   | -1,201068 | -1,159396 | <b>-1,180232</b>  | 2344 | 2182 | <b>2263</b>   |
| ABCC9    | -1,406745 | -0,952876 | <b>-1,1798105</b> | 1796 | 2412 | <b>2104</b>   |
| EVI2B    | -1,179572 | NaN       | <b>-1,179572</b>  | 1250 | NaN  | <b>1250</b>   |
| MYOZ1    | -1,179405 | NaN       | <b>-1,179405</b>  | 1619 | NaN  | <b>1619</b>   |
| GAS2L2   | -1,17931  | NaN       | <b>-1,17931</b>   | 1697 | NaN  | <b>1697</b>   |
| GP9      | -1,622456 | -0,73602  | <b>-1,179238</b>  | 1572 | 1748 | <b>1660</b>   |
| EDARADD  | -1,185599 | -1,172057 | <b>-1,178828</b>  | 1817 | 2280 | <b>2048,5</b> |
| OR2D2    | -1,117942 | -1,235334 | <b>-1,176638</b>  | 1925 | 2058 | <b>1991,5</b> |
| RUNX2    | -1,216829 | -1,136259 | <b>-1,176544</b>  | 1929 | 2248 | <b>2088,5</b> |
| TMEM176A | -0,799958 | -1,55083  | <b>-1,175394</b>  | 1122 | 1697 | <b>1409,5</b> |
| TEP1     | -0,931395 | -1,417542 | <b>-1,1744685</b> | 1046 | 2009 | <b>1527,5</b> |
| C10orf91 | -1,174074 | NaN       | <b>-1,174074</b>  | 1323 | NaN  | <b>1323</b>   |
| VWF      | -1,279198 | -1,06853  | <b>-1,173864</b>  | 1033 | 1246 | <b>1139,5</b> |
| WT1      | -1,432036 | -0,914346 | <b>-1,173191</b>  | 1525 | 1432 | <b>1478,5</b> |
| ACTA1    | -1,179443 | -1,164116 | <b>-1,1717795</b> | 1700 | 1874 | <b>1787</b>   |
| TMEM101  | -1,171763 | NaN       | <b>-1,171763</b>  | 1574 | NaN  | <b>1574</b>   |
| USP16    | -1,439941 | -0,89797  | <b>-1,1689555</b> | 1471 | 2190 | <b>1830,5</b> |
| SIRT3    | -1,423356 | -0,914413 | <b>-1,1688845</b> | 1010 | 1722 | <b>1366</b>   |
| LZIC     | -1,212979 | -1,123732 | <b>-1,1683555</b> | 1608 | 1935 | <b>1771,5</b> |
| RBM28    | -0,803867 | -1,5326   | <b>-1,1682335</b> | 1600 | 1067 | <b>1333,5</b> |
| FAM151A  | -0,743721 | -1,592551 | <b>-1,168136</b>  | 1717 | 1909 | <b>1813</b>   |
| IGSF8    | -1,031847 | -1,304213 | <b>-1,16803</b>   | 1421 | 2084 | <b>1752,5</b> |
| BANK1    | -0,4719   | -1,863633 | <b>-1,1677665</b> | 1312 | 1944 | <b>1628</b>   |
| SLC34A2  | -1,623347 | -0,710584 | <b>-1,1669655</b> | 1351 | 1969 | <b>1660</b>   |

|         |           |           |                   |      |      |               |
|---------|-----------|-----------|-------------------|------|------|---------------|
| ZNF446  | -0,841977 | -1,491636 | <b>-1,1668065</b> | 1829 | 1760 | <b>1794,5</b> |
| UNC93B1 | -1,486448 | -0,846812 | <b>-1,16663</b>   | 1404 | 1989 | <b>1696,5</b> |
| MAP2K2  | -1,365211 | -0,967527 | <b>-1,166369</b>  | 1799 | 2534 | <b>2166,5</b> |
| ACADSB  | -1,353893 | -0,978325 | <b>-1,166109</b>  | 1550 | 2348 | <b>1949</b>   |
| ODAM    | -1,165164 | NaN       | <b>-1,165164</b>  | 1434 | NaN  | <b>1434</b>   |
| TIMMDC1 | -1,16507  | NaN       | <b>-1,16507</b>   | 1911 | NaN  | <b>1911</b>   |
| LTB4R   | -1,164914 | NaN       | <b>-1,164914</b>  | 1083 | NaN  | <b>1083</b>   |
| EFCAB3  | -1,521823 | -0,807786 | <b>-1,1648045</b> | 1943 | 2436 | <b>2189,5</b> |
| PPBP    | -1,483058 | -0,846081 | <b>-1,1645695</b> | 1838 | 2146 | <b>1992</b>   |
| IRX5    | -1,126058 | -1,202931 | <b>-1,1644945</b> | 1154 | 1709 | <b>1431,5</b> |
| RBP4    | -1,165812 | -1,162341 | <b>-1,1640765</b> | 1317 | 1488 | <b>1402,5</b> |
| NECAB1  | -1,163929 | NaN       | <b>-1,163929</b>  | 1384 | NaN  | <b>1384</b>   |
| GPR149  | -1,163392 | NaN       | <b>-1,163392</b>  | 2048 | NaN  | <b>2048</b>   |
| UBE4B   | -1,033493 | -1,293075 | <b>-1,163284</b>  | 1289 | 1932 | <b>1610,5</b> |
| PIWIL1  | -1,178434 | -1,148132 | <b>-1,163283</b>  | 1174 | 1507 | <b>1340,5</b> |
| ABCC1   | -1,297268 | -1,028291 | <b>-1,1627795</b> | 767  | 1783 | <b>1275</b>   |
| C1orf68 | -1,00127  | -1,323237 | <b>-1,1622535</b> | 1441 | 2153 | <b>1797</b>   |
| ACCN2   | -1,412931 | -0,910752 | <b>-1,1618415</b> | 2204 | 2907 | <b>2555,5</b> |
| HSPBP1  | -1,118046 | -1,204928 | <b>-1,161487</b>  | 1768 | 2087 | <b>1927,5</b> |
| UNC80   | -1,160546 | NaN       | <b>-1,160546</b>  | 1677 | NaN  | <b>1677</b>   |
| CNR2    | -1,735043 | -0,584055 | <b>-1,159549</b>  | 1817 | 1745 | <b>1781</b>   |
| SNAI2   | -0,946983 | -1,371005 | <b>-1,158994</b>  | 1011 | 1686 | <b>1348,5</b> |
| IL22    | -1,157664 | NaN       | <b>-1,157664</b>  | 1350 | NaN  | <b>1350</b>   |
| PRDM5   | -1,014847 | -1,300125 | <b>-1,157486</b>  | 1592 | 2009 | <b>1800,5</b> |
| GPR108  | -1,156744 | NaN       | <b>-1,156744</b>  | 2177 | NaN  | <b>2177</b>   |
| BLNK    | -1,008753 | -1,304702 | <b>-1,1567275</b> | 1116 | 1701 | <b>1408,5</b> |
| FBXO32  | -1,106265 | -1,206964 | <b>-1,1566145</b> | 1909 | 2638 | <b>2273,5</b> |
| PPP1R1C | -1,097136 | -1,212914 | <b>-1,155025</b>  | 1441 | 2286 | <b>1863,5</b> |
| LINGO1  | -0,432167 | -1,877368 | <b>-1,1547675</b> | 1818 | 2244 | <b>2031</b>   |
| MTMR4   | -1,856792 | -0,45265  | <b>-1,154721</b>  | 1164 | 1960 | <b>1562</b>   |
| CSPG5   | -1,948723 | -0,360489 | <b>-1,154606</b>  | 1377 | 1929 | <b>1653</b>   |
| SNAI1   | -0,745441 | -1,563488 | <b>-1,1544645</b> | 1965 | 2347 | <b>2156</b>   |
| AQP10   | -1,149521 | -1,159003 | <b>-1,154262</b>  | 1493 | 1872 | <b>1682,5</b> |
| GPR6    | -1,154032 | NaN       | <b>-1,154032</b>  | 1300 | NaN  | <b>1300</b>   |

|          |           |           |                   |      |      |               |
|----------|-----------|-----------|-------------------|------|------|---------------|
| SACS     | -1,154002 | NaN       | <b>-1,154002</b>  | 1958 | NaN  | <b>1958</b>   |
| SLC2A12  | -1,176062 | -1,130683 | <b>-1,1533725</b> | 1893 | 2197 | <b>2045</b>   |
| DLGAP5   | -1,352979 | -0,953289 | <b>-1,153134</b>  | 1945 | 2304 | <b>2124,5</b> |
| MON1B    | -1,152666 | NaN       | <b>-1,152666</b>  | 1792 | NaN  | <b>1792</b>   |
| MAPKAPK2 | 0,462457  | -2,764832 | <b>-1,1511875</b> | 1673 | 2028 | <b>1850,5</b> |
| GNG3     | -1,269548 | -1,032126 | <b>-1,150837</b>  | 1538 | 2245 | <b>1891,5</b> |
| MECP2    | -0,852167 | -1,449257 | <b>-1,150712</b>  | 1695 | 1439 | <b>1567</b>   |
| FBN2     | -1,493143 | -0,807555 | <b>-1,150349</b>  | 2495 | 1897 | <b>2196</b>   |
| FAM73A   | -1,257594 | -1,043032 | <b>-1,150313</b>  | 1693 | 2075 | <b>1884</b>   |
| INHBA    | -0,66302  | -1,637074 | <b>-1,150047</b>  | 1571 | 2160 | <b>1865,5</b> |
| ZBTB43   | -1,793747 | -0,506152 | <b>-1,1499495</b> | 1551 | 1422 | <b>1486,5</b> |
| C11orf24 | -0,840735 | -1,458221 | <b>-1,149478</b>  | 2163 | 2180 | <b>2171,5</b> |
| R3HDM2   | -1,759257 | -0,534809 | <b>-1,147033</b>  | 1492 | 2231 | <b>1861,5</b> |
| FBXO30   | -0,740254 | -1,553361 | <b>-1,1468075</b> | 1348 | 2317 | <b>1832,5</b> |
| GDF11    | -0,997007 | -1,296428 | <b>-1,1467175</b> | 1042 | 1919 | <b>1480,5</b> |
| FOXS1    | NaN       | -1,146597 | <b>-1,146597</b>  | NaN  | 2197 | <b>2197</b>   |
| DAO      | -1,610013 | -0,683023 | <b>-1,146518</b>  | 1756 | 2077 | <b>1916,5</b> |
| ZNF193   | -0,434848 | -1,857859 | <b>-1,1463535</b> | 1474 | 1849 | <b>1661,5</b> |
| PCDH15   | -0,920849 | -1,370684 | <b>-1,1457665</b> | 1646 | 1888 | <b>1767</b>   |
| SDCCAG3  | -1,145645 | NaN       | <b>-1,145645</b>  | 1313 | NaN  | <b>1313</b>   |
| TMEM184B | -1,228651 | -1,062488 | <b>-1,1455695</b> | 1552 | 1648 | <b>1600</b>   |
| CBFA2T2  | NaN       | -1,14552  | <b>-1,14552</b>   | NaN  | 1873 | <b>1873</b>   |
| PAM      | -0,508811 | -1,781334 | <b>-1,1450725</b> | 690  | 1207 | <b>948,5</b>  |
| ABR      | -0,983356 | -1,306595 | <b>-1,1449755</b> | 1803 | 2184 | <b>1993,5</b> |
| FBXO5    | -1,578922 | -0,710217 | <b>-1,1445695</b> | 450  | 960  | <b>705</b>    |
| NAP1L2   | -0,544343 | -1,743579 | <b>-1,143961</b>  | 2173 | 2626 | <b>2399,5</b> |
| FCRL4    | -1,341561 | -0,94618  | <b>-1,1438705</b> | 1433 | 2089 | <b>1761</b>   |
| ADD1     | -1,144656 | -1,143074 | <b>-1,143865</b>  | 1338 | 1603 | <b>1470,5</b> |
| GPR112   | -1,142391 | NaN       | <b>-1,142391</b>  | 1763 | NaN  | <b>1763</b>   |
| HCN3     | -0,868308 | -1,415129 | <b>-1,1417185</b> | 1817 | 2406 | <b>2111,5</b> |
| ZNF43    | -1,140518 | NaN       | <b>-1,140518</b>  | 1568 | NaN  | <b>1568</b>   |
| C6orf218 | -1,13997  | NaN       | <b>-1,13997</b>   | 1804 | NaN  | <b>1804</b>   |
| BRPF3    | -1,07517  | -1,204671 | <b>-1,1399205</b> | 1506 | 2069 | <b>1787,5</b> |
| TGFB3    | -1,43155  | -0,847163 | <b>-1,1393565</b> | 1912 | 2378 | <b>2145</b>   |

|          |           |           |                   |      |      |               |
|----------|-----------|-----------|-------------------|------|------|---------------|
| THAP4    | -1,139081 | NaN       | <b>-1,139081</b>  | 1638 | NaN  | <b>1638</b>   |
| WBCSCR28 | -1,474765 | -0,803323 | <b>-1,139044</b>  | 1684 | 2813 | <b>2248,5</b> |
| AURKAIP1 | -1,027744 | -1,249695 | <b>-1,1387195</b> | 1722 | 2126 | <b>1924</b>   |
| RAB5C    | NaN       | -1,138472 | <b>-1,138472</b>  | NaN  | 2435 | <b>2435</b>   |
| TSGA10   | -1,016507 | -1,259945 | <b>-1,138226</b>  | 1791 | 2243 | <b>2017</b>   |
| OTUD3    | -1,794267 | -0,480873 | <b>-1,13757</b>   | 1679 | 1957 | <b>1818</b>   |
| KCNK7    | -1,561048 | -0,713606 | <b>-1,137327</b>  | 1607 | 2373 | <b>1990</b>   |
| MZT1     | -0,457409 | -1,817141 | <b>-1,137275</b>  | 1670 | 1810 | <b>1740</b>   |
| AWAT2    | -0,921673 | -1,35193  | <b>-1,1368015</b> | 1630 | 2044 | <b>1837</b>   |
| C19orf18 | -1,097995 | -1,174712 | <b>-1,1363535</b> | 1298 | 1833 | <b>1565,5</b> |
| YAF2     | -1,259121 | -1,013489 | <b>-1,136305</b>  | 1772 | 2051 | <b>1911,5</b> |
| NDRG2    | -0,937901 | -1,334663 | <b>-1,136282</b>  | 1897 | 1835 | <b>1866</b>   |
| ROCK2    | -1,16091  | -1,111524 | <b>-1,136217</b>  | 1192 | 2288 | <b>1740</b>   |
| ORAI1    | -1,227957 | -1,043824 | <b>-1,1358905</b> | 1673 | 2141 | <b>1907</b>   |
| TLL10    | -1,135852 | NaN       | <b>-1,135852</b>  | 1494 | NaN  | <b>1494</b>   |
| GABPA    | -0,793822 | -1,477344 | <b>-1,135583</b>  | 1714 | 1904 | <b>1809</b>   |
| NRP1     | -1,493563 | -0,777304 | <b>-1,1354335</b> | 1422 | 2272 | <b>1847</b>   |
| KIAA1328 | -1,23082  | -1,039708 | <b>-1,135264</b>  | 1486 | 1734 | <b>1610</b>   |
| RPRD1A   | -1,135098 | NaN       | <b>-1,135098</b>  | 1756 | NaN  | <b>1756</b>   |
| RAB20    | -0,123283 | -2,146355 | <b>-1,134819</b>  | 1593 | 1463 | <b>1528</b>   |
| FOXF1    | -1,185442 | -1,08323  | <b>-1,134336</b>  | 1171 | 1553 | <b>1362</b>   |
| OR2T10   | -1,133933 | NaN       | <b>-1,133933</b>  | 2181 | NaN  | <b>2181</b>   |
| POU2F3   | -0,74523  | -1,521763 | <b>-1,1334965</b> | 1716 | 2564 | <b>2140</b>   |
| SPTLC1   | -1,184547 | -1,082426 | <b>-1,1334865</b> | 1335 | 2203 | <b>1769</b>   |
| KCNG2    | -1,092479 | -1,173901 | <b>-1,13319</b>   | 1303 | 2028 | <b>1665,5</b> |
| GPR75    | -1,133147 | NaN       | <b>-1,133147</b>  | 1537 | NaN  | <b>1537</b>   |
| ATP7B    | -1,12115  | -1,144844 | <b>-1,132997</b>  | 2021 | 2200 | <b>2110,5</b> |
| NEK3     | -1,260797 | -1,002471 | <b>-1,131634</b>  | 1818 | 2066 | <b>1942</b>   |
| RAB9A    | -0,979253 | -1,283621 | <b>-1,131437</b>  | 1503 | 2076 | <b>1789,5</b> |
| IMP4     | -0,927707 | -1,334523 | <b>-1,131115</b>  | 1333 | 1999 | <b>1666</b>   |
| ZC3H13   | -0,956367 | -1,304396 | <b>-1,1303815</b> | 1485 | 1687 | <b>1586</b>   |
| FAM199X  | -1,706034 | -0,554225 | <b>-1,1301295</b> | 1758 | 2130 | <b>1944</b>   |
| UTP20    | -1,129189 | NaN       | <b>-1,129189</b>  | 1679 | NaN  | <b>1679</b>   |
| ERC1     | -1,129176 | NaN       | <b>-1,129176</b>  | 1864 | NaN  | <b>1864</b>   |

|          |           |           |                   |      |      |               |
|----------|-----------|-----------|-------------------|------|------|---------------|
| MAPK12   | -1,500296 | -0,756637 | <b>-1,1284665</b> | 1474 | 2049 | <b>1761,5</b> |
| SLMO1    | -1,084294 | -1,171964 | <b>-1,128129</b>  | 1480 | 1592 | <b>1536</b>   |
| LIG4     | -1,029312 | -1,226362 | <b>-1,127837</b>  | 1227 | 1789 | <b>1508</b>   |
| STMN3    | -1,209902 | -1,044479 | <b>-1,1271905</b> | 1401 | 2031 | <b>1716</b>   |
| ZNF749   | -1,12718  | NaN       | <b>-1,12718</b>   | 1834 | NaN  | <b>1834</b>   |
| FAM173B  | -0,740211 | -1,51405  | <b>-1,1271305</b> | 1947 | 2522 | <b>2234,5</b> |
| DSG1     | -1,431084 | -0,822016 | <b>-1,12655</b>   | 1869 | 2877 | <b>2373</b>   |
| MFN2     | -1,309938 | -0,942947 | <b>-1,1264425</b> | 1235 | 2002 | <b>1618,5</b> |
| TLL11    | -1,163864 | -1,088161 | <b>-1,1260125</b> | 1471 | 1873 | <b>1672</b>   |
| POLR2I   | -0,869898 | -1,381719 | <b>-1,1258085</b> | 1035 | 1061 | <b>1048</b>   |
| TANC1    | -1,391906 | -0,859048 | <b>-1,125477</b>  | 1588 | 1583 | <b>1585,5</b> |
| C12orf49 | -0,893778 | -1,356695 | <b>-1,1252365</b> | 1335 | 1187 | <b>1261</b>   |
| IL19     | -0,710284 | -1,539766 | <b>-1,125025</b>  | 1406 | 2091 | <b>1748,5</b> |
| MIPOL1   | -1,435264 | -0,814396 | <b>-1,12483</b>   | 2229 | 2522 | <b>2375,5</b> |
| PLEKHA1  | -1,76144  | -0,487991 | <b>-1,1247155</b> | 2179 | 2788 | <b>2483,5</b> |
| CTTNBP2  | -0,673737 | -1,575121 | <b>-1,124429</b>  | 1845 | 2039 | <b>1942</b>   |
| C11orf53 | -1,630386 | -0,617914 | <b>-1,12415</b>   | 1681 | 2444 | <b>2062,5</b> |
| MRTO4    | -1,61317  | -0,634989 | <b>-1,1240795</b> | 1846 | 2504 | <b>2175</b>   |
| TTC31    | -1,123677 | NaN       | <b>-1,123677</b>  | 1464 | NaN  | <b>1464</b>   |
| PRKAG3   | -1,218083 | -1,02908  | <b>-1,1235815</b> | 937  | 1438 | <b>1187,5</b> |
| SLC25A22 | -0,769378 | -1,477717 | <b>-1,1235475</b> | 1361 | 2281 | <b>1821</b>   |
| TMEM59   | -1,123346 | NaN       | <b>-1,123346</b>  | 1931 | NaN  | <b>1931</b>   |
| TGM4     | -1,310414 | -0,935932 | <b>-1,123173</b>  | 1850 | 2199 | <b>2024,5</b> |
| PPP2R2D  | -1,178744 | -1,067214 | <b>-1,122979</b>  | 1972 | 2390 | <b>2181</b>   |
| RADIL    | -0,426744 | -1,818319 | <b>-1,1225315</b> | 2025 | 2454 | <b>2239,5</b> |
| RG9MTD3  | -0,74482  | -1,499365 | <b>-1,1220925</b> | 1952 | 2074 | <b>2013</b>   |
| PES1     | -0,441254 | -1,80285  | <b>-1,122052</b>  | 1569 | 1763 | <b>1666</b>   |
| UBIAD1   | -1,392228 | -0,851548 | <b>-1,121888</b>  | 1221 | 1968 | <b>1594,5</b> |
| C7orf74  | -1,939581 | -0,303901 | <b>-1,121741</b>  | 1342 | 1526 | <b>1434</b>   |
| IZUMO4   | -1,061607 | -1,181031 | <b>-1,121319</b>  | 1627 | 2056 | <b>1841,5</b> |
| PON1     | -1,427116 | -0,815489 | <b>-1,1213025</b> | 1294 | 2124 | <b>1709</b>   |
| C6orf195 | -0,764437 | -1,477444 | <b>-1,1209405</b> | 1479 | 2077 | <b>1778</b>   |
| HIP1R    | -1,400547 | -0,841327 | <b>-1,120937</b>  | 1556 | 2514 | <b>2035</b>   |
| PHF1     | -1,256434 | -0,985248 | <b>-1,120841</b>  | 1337 | 1578 | <b>1457,5</b> |

|          |           |           |                   |      |      |               |
|----------|-----------|-----------|-------------------|------|------|---------------|
| SLC30A1  | -1,890675 | -0,350718 | <b>-1,1206965</b> | 1932 | 2525 | <b>2228,5</b> |
| KLHL38   | -1,047241 | -1,192452 | <b>-1,1198465</b> | 1798 | 2247 | <b>2022,5</b> |
| ITGA11   | NaN       | -1,119424 | <b>-1,119424</b>  | NaN  | 2640 | <b>2640</b>   |
| NFASC    | -1,167293 | -1,071289 | <b>-1,119291</b>  | 1437 | 2054 | <b>1745,5</b> |
| AWAT1    | -1,230014 | -1,008487 | <b>-1,1192505</b> | 1406 | 1683 | <b>1544,5</b> |
| PRRG3    | -0,725034 | -1,512099 | <b>-1,1185665</b> | 1202 | 1511 | <b>1356,5</b> |
| ZNF645   | -0,915782 | -1,321333 | <b>-1,1185575</b> | 1640 | 2311 | <b>1975,5</b> |
| ORMDL2   | -0,934184 | -1,302123 | <b>-1,1181535</b> | 1633 | 2140 | <b>1886,5</b> |
| NPDC1    | 0,146823  | -2,380141 | <b>-1,116659</b>  | 1980 | 2113 | <b>2046,5</b> |
| TCF20    | -1,217803 | -1,014434 | <b>-1,1161185</b> | 1612 | 2231 | <b>1921,5</b> |
| RAB37    | -1,115858 | NaN       | <b>-1,115858</b>  | 1627 | NaN  | <b>1627</b>   |
| SLC2A8   | -1,253608 | -0,976322 | <b>-1,114965</b>  | 542  | 1306 | <b>924</b>    |
| TCTEX1D2 | -1,682918 | -0,545765 | <b>-1,1143415</b> | 1693 | 1571 | <b>1632</b>   |
| NMU      | -1,731635 | -0,496985 | <b>-1,11431</b>   | 1599 | 2478 | <b>2038,5</b> |
| RNF212   | -1,114303 | NaN       | <b>-1,114303</b>  | 2096 | NaN  | <b>2096</b>   |
| RPL28    | -0,459842 | -1,767912 | <b>-1,113877</b>  | 1312 | 1722 | <b>1517</b>   |
| PSG9     | -1,072603 | -1,154818 | <b>-1,1137105</b> | 825  | 1543 | <b>1184</b>   |
| C1orf105 | -0,97826  | -1,248954 | <b>-1,113607</b>  | 1161 | 1371 | <b>1266</b>   |
| CCR5     | -1,113395 | NaN       | <b>-1,113395</b>  | 1725 | NaN  | <b>1725</b>   |
| AUH      | -1,088242 | -1,138509 | <b>-1,1133755</b> | 1310 | 2026 | <b>1668</b>   |
| RENBP    | -1,851196 | -0,374022 | <b>-1,112609</b>  | 2014 | 2445 | <b>2229,5</b> |
| ANXA5    | -1,29704  | -0,927829 | <b>-1,1124345</b> | 1602 | 1904 | <b>1753</b>   |
| SKI      | -1,600423 | -0,624217 | <b>-1,11232</b>   | 1776 | 1837 | <b>1806,5</b> |
| SELT     | -1,111994 | NaN       | <b>-1,111994</b>  | 2273 | NaN  | <b>2273</b>   |
| ERRFI1   | -1,111459 | NaN       | <b>-1,111459</b>  | 1521 | NaN  | <b>1521</b>   |
| TMEM57   | -0,628337 | -1,594527 | <b>-1,111432</b>  | 1233 | 1791 | <b>1512</b>   |
| RPGRIP1  | -1,570551 | -0,650847 | <b>-1,110699</b>  | 1546 | 2029 | <b>1787,5</b> |
| SORL1    | -0,784896 | -1,436178 | <b>-1,110537</b>  | 976  | 1939 | <b>1457,5</b> |
| C8orf55  | -0,797675 | -1,423373 | <b>-1,110524</b>  | 1930 | 2378 | <b>2154</b>   |
| HBQ1     | -1,791824 | -0,428495 | <b>-1,1101595</b> | 1359 | 1989 | <b>1674</b>   |
| STRN3    | -1,304469 | -0,914496 | <b>-1,1094825</b> | 1963 | 2515 | <b>2239</b>   |
| UBE2D1   | -1,508963 | -0,709148 | <b>-1,1090555</b> | 1588 | 2749 | <b>2168,5</b> |
| GC       | -1,325113 | -0,892818 | <b>-1,1089655</b> | 1629 | 1865 | <b>1747</b>   |
| HTR3D    | -1,490832 | -0,726689 | <b>-1,1087605</b> | 1513 | 2775 | <b>2144</b>   |

|           |           |           |                   |      |      |               |
|-----------|-----------|-----------|-------------------|------|------|---------------|
| CST3      | -1,313959 | -0,902433 | <b>-1,108196</b>  | 1428 | 1939 | <b>1683,5</b> |
| ADORA1    | -1,108054 | NaN       | <b>-1,108054</b>  | 1494 | NaN  | <b>1494</b>   |
| PHF3      | -1,092046 | -1,12357  | <b>-1,107808</b>  | 1272 | 1818 | <b>1545</b>   |
| SELL      | -1,125005 | -1,089441 | <b>-1,107223</b>  | 1349 | 1916 | <b>1632,5</b> |
| SRGN      | -0,922274 | -1,291607 | <b>-1,1069405</b> | 1328 | 2378 | <b>1853</b>   |
| AGR3      | -1,106796 | NaN       | <b>-1,106796</b>  | 1786 | NaN  | <b>1786</b>   |
| TSPO2     | -1,497939 | -0,714795 | <b>-1,106367</b>  | 1306 | 1643 | <b>1474,5</b> |
| GORASP1   | -1,1786   | -1,03345  | <b>-1,106025</b>  | 1372 | 1677 | <b>1524,5</b> |
| SYNM      | -1,105871 | NaN       | <b>-1,105871</b>  | 1552 | NaN  | <b>1552</b>   |
| C14orf101 | -1,105599 | NaN       | <b>-1,105599</b>  | 1799 | NaN  | <b>1799</b>   |
| OR5P2     | -1,116288 | -1,094722 | <b>-1,105505</b>  | 582  | 1270 | <b>926</b>    |
| DACH2     | -0,632454 | -1,577543 | <b>-1,1049985</b> | 1498 | 2263 | <b>1880,5</b> |
| VPS37A    | -1,10458  | NaN       | <b>-1,10458</b>   | 1671 | NaN  | <b>1671</b>   |
| DISP2     | -1,104563 | NaN       | <b>-1,104563</b>  | 1342 | NaN  | <b>1342</b>   |
| MFS11     | -1,104495 | NaN       | <b>-1,104495</b>  | 1586 | NaN  | <b>1586</b>   |
| ACLY      | -1,215547 | -0,993041 | <b>-1,104294</b>  | 2167 | 2497 | <b>2332</b>   |
| CNOT4     | -1,572958 | -0,634203 | <b>-1,1035805</b> | 1873 | 2782 | <b>2327,5</b> |
| ABCE1     | -1,053695 | -1,152775 | <b>-1,103235</b>  | 1439 | 1382 | <b>1410,5</b> |
| OGFRL1    | -1,517288 | -0,688848 | <b>-1,103068</b>  | 1632 | 2110 | <b>1871</b>   |
| PDCD5     | -1,64077  | -0,565351 | <b>-1,1030605</b> | 675  | 911  | <b>793</b>    |
| MTF2      | -1,297235 | -0,906866 | <b>-1,1020505</b> | 985  | 1509 | <b>1247</b>   |
| AP2B1     | -1,465432 | -0,738577 | <b>-1,1020045</b> | 2049 | 2022 | <b>2035,5</b> |
| ZBTB7A    | NaN       | -1,101634 | <b>-1,101634</b>  | NaN  | 2607 | <b>2607</b>   |
| TMEM108   | -0,614992 | -1,587083 | <b>-1,1010375</b> | 1397 | 1788 | <b>1592,5</b> |
| ZNF391    | -1,306542 | -0,895201 | <b>-1,1008715</b> | 1580 | 1647 | <b>1613,5</b> |
| EVL       | -1,097912 | -1,103166 | <b>-1,100539</b>  | 2107 | 2139 | <b>2123</b>   |
| ANKFY1    | -1,173223 | -1,027566 | <b>-1,1003945</b> | 941  | 1848 | <b>1394,5</b> |
| GLI3      | -0,652192 | -1,547633 | <b>-1,0999125</b> | 1605 | 2260 | <b>1932,5</b> |
| E2F3      | -1,256305 | -0,94335  | <b>-1,0998275</b> | 1271 | 1275 | <b>1273</b>   |
| GCGR      | -1,099528 | NaN       | <b>-1,099528</b>  | 1581 | NaN  | <b>1581</b>   |
| SMARCA4   | NaN       | -1,099242 | <b>-1,099242</b>  | NaN  | 2011 | <b>2011</b>   |
| DIP2A     | -1,119204 | -1,078885 | <b>-1,0990445</b> | 1636 | 1754 | <b>1695</b>   |
| CDS1      | -1,388992 | -0,808572 | <b>-1,098782</b>  | 1237 | 1405 | <b>1321</b>   |
| TMEM132E  | -1,363375 | -0,832052 | <b>-1,0977135</b> | 1438 | 2007 | <b>1722,5</b> |



|          |           |           |                   |      |      |               |
|----------|-----------|-----------|-------------------|------|------|---------------|
| KDELR2   | -0,162671 | -2,032155 | <b>-1,097413</b>  | 1493 | 2579 | <b>2036</b>   |
| DZIP3    | -0,796952 | -1,396832 | <b>-1,096892</b>  | 1537 | 2227 | <b>1882</b>   |
| NUDT16L1 | -1,571768 | -0,621945 | <b>-1,0968565</b> | 1854 | 2463 | <b>2158,5</b> |
| MLC1     | -0,930967 | -1,262695 | <b>-1,096831</b>  | 991  | 1734 | <b>1362,5</b> |
| RFWD3    | -1,152434 | -1,041135 | <b>-1,0967845</b> | 1399 | 1853 | <b>1626</b>   |
| CLEC2D   | -0,775159 | -1,418284 | <b>-1,0967215</b> | 1233 | 1457 | <b>1345</b>   |
| KIF3B    | -1,25743  | -0,935473 | <b>-1,0964515</b> | 1213 | 2151 | <b>1682</b>   |
| PARD3    | -1,567826 | -0,623613 | <b>-1,0957195</b> | 1960 | 2339 | <b>2149,5</b> |
| SATL1    | -1,588525 | -0,602486 | <b>-1,0955055</b> | 1428 | 1939 | <b>1683,5</b> |
| DPP6     | -1,152146 | -1,038139 | <b>-1,0951425</b> | 1926 | 2395 | <b>2160,5</b> |
| PLCE1    | -0,582212 | -1,607571 | <b>-1,0948915</b> | 1040 | 1911 | <b>1475,5</b> |
| TAF7L    | -1,743357 | -0,44609  | <b>-1,0947235</b> | 1850 | 2444 | <b>2147</b>   |
| CHAF1B   | -1,675986 | -0,512804 | <b>-1,094395</b>  | 1442 | 1483 | <b>1462,5</b> |
| PLXNB1   | -0,500239 | -1,687962 | <b>-1,0941005</b> | 1736 | 1852 | <b>1794</b>   |
| FANCD2   | -1,729065 | -0,458673 | <b>-1,093869</b>  | 1683 | 1666 | <b>1674,5</b> |
| S1PR3    | -1,093655 | NaN       | <b>-1,093655</b>  | 1715 | NaN  | <b>1715</b>   |
| MED6     | -0,638668 | -1,546234 | <b>-1,092451</b>  | 1161 | 1587 | <b>1374</b>   |
| ADAM30   | -1,152723 | -1,031706 | <b>-1,0922145</b> | 1597 | 2069 | <b>1833</b>   |
| MRAP     | -1,145068 | -1,038308 | <b>-1,091688</b>  | 1854 | 2013 | <b>1933,5</b> |
| EFNA5    | -1,892239 | -0,290446 | <b>-1,0913425</b> | 1246 | 1780 | <b>1513</b>   |
| ARMCX6   | -1,052558 | -1,12969  | <b>-1,091124</b>  | 1459 | 1901 | <b>1680</b>   |
| SSH2     | -1,405898 | -0,775267 | <b>-1,0905825</b> | 1345 | 2135 | <b>1740</b>   |
| MRFAP1L1 | -1,547565 | -0,633032 | <b>-1,0902985</b> | 1687 | 2989 | <b>2338</b>   |
| ANKRD1   | -0,643402 | -1,536734 | <b>-1,090068</b>  | 1143 | 2004 | <b>1573,5</b> |
| NSUN3    | -1,089713 | NaN       | <b>-1,089713</b>  | 1433 | NaN  | <b>1433</b>   |
| MTAP     | -1,128119 | -1,050839 | <b>-1,089479</b>  | 1481 | 2095 | <b>1788</b>   |
| CDC42BPA | -0,551537 | -1,62739  | <b>-1,0894635</b> | 1371 | 2317 | <b>1844</b>   |
| B4GALNT1 | -1,17656  | -1,001521 | <b>-1,0890405</b> | 1721 | 2679 | <b>2200</b>   |
| ZNF764   | -1,088572 | NaN       | <b>-1,088572</b>  | 1545 | NaN  | <b>1545</b>   |
| MUC7     | -0,486606 | -1,690377 | <b>-1,0884915</b> | 1882 | 2112 | <b>1997</b>   |
| THRB     | -0,71944  | -1,456946 | <b>-1,088193</b>  | 1623 | 2017 | <b>1820</b>   |
| SMG7     | -1,179787 | -0,996454 | <b>-1,0881205</b> | 1438 | 1974 | <b>1706</b>   |
| PTGS2    | -1,448833 | -0,727077 | <b>-1,087955</b>  | 1669 | 2203 | <b>1936</b>   |
| ARIH1    | -1,418925 | -0,756545 | <b>-1,087735</b>  | 1729 | 2872 | <b>2300,5</b> |

|         |           |           |                   |      |      |               |
|---------|-----------|-----------|-------------------|------|------|---------------|
| SRPX2   | -1,243867 | -0,931067 | <b>-1,087467</b>  | 1884 | 1897 | <b>1890,5</b> |
| CMTM7   | -1,299524 | -0,874482 | <b>-1,087003</b>  | 1637 | 2135 | <b>1886</b>   |
| MRM1    | -1,418564 | -0,754942 | <b>-1,086753</b>  | 1609 | 2272 | <b>1940,5</b> |
| SUPV3L1 | -1,958597 | -0,214478 | <b>-1,0865375</b> | 2004 | 2108 | <b>2056</b>   |
| TRNP1   | -1,236591 | -0,935723 | <b>-1,086157</b>  | 1342 | 1642 | <b>1492</b>   |
| FAM179B | -0,962056 | -1,210015 | <b>-1,0860355</b> | 1728 | 2360 | <b>2044</b>   |
| GDF6    | -1,364123 | -0,806364 | <b>-1,0852435</b> | 1986 | 2097 | <b>2041,5</b> |
| LRRN2   | -1,824648 | -0,344915 | <b>-1,0847815</b> | 1990 | 1972 | <b>1981</b>   |
| LDHAL6B | -0,993499 | -1,175675 | <b>-1,084587</b>  | 1474 | 1704 | <b>1589</b>   |
| YIPF7   | -2,32178  | 0,152949  | <b>-1,0844155</b> | 1460 | 1526 | <b>1493</b>   |
| RBM11   | NaN       | -1,084205 | <b>-1,084205</b>  | NaN  | 2426 | <b>2426</b>   |
| PNKP    | -0,193087 | -1,974934 | <b>-1,0840105</b> | 1753 | 1704 | <b>1728,5</b> |
| MOBKL1A | -0,277105 | -1,890697 | <b>-1,083901</b>  | 1832 | 2023 | <b>1927,5</b> |
| TTBK2   | -1,186137 | -0,981492 | <b>-1,0838145</b> | 1285 | 1845 | <b>1565</b>   |
| KLF17   | -1,08362  | NaN       | <b>-1,08362</b>   | 1681 | NaN  | <b>1681</b>   |
| B3GNT4  | -0,655612 | -1,511376 | <b>-1,083494</b>  | 1609 | 2149 | <b>1879</b>   |
| SLC39A3 | -1,197544 | -0,968296 | <b>-1,08292</b>   | 1473 | 1767 | <b>1620</b>   |
| CDON    | -1,292189 | -0,872989 | <b>-1,082589</b>  | 1636 | 2021 | <b>1828,5</b> |
| PSG5    | -1,414267 | -0,74901  | <b>-1,0816385</b> | 1132 | 1644 | <b>1388</b>   |
| NUP93   | -0,229207 | -1,934005 | <b>-1,081606</b>  | 1423 | 1001 | <b>1212</b>   |
| C5orf53 | -2,238571 | 0,076035  | <b>-1,081268</b>  | 1363 | 1573 | <b>1468</b>   |
| HARS2   | -0,803806 | -1,358623 | <b>-1,0812145</b> | 1673 | 2274 | <b>1973,5</b> |
| FAM65C  | -1,080308 | NaN       | <b>-1,080308</b>  | 1644 | NaN  | <b>1644</b>   |
| RARB    | -1,353446 | -0,806862 | <b>-1,080154</b>  | 1728 | 2203 | <b>1965,5</b> |
| EEF2    | -0,350853 | -1,807262 | <b>-1,0790575</b> | 1617 | 2411 | <b>2014</b>   |
| LCE6A   | -1,35448  | -0,802256 | <b>-1,078368</b>  | 1321 | 1780 | <b>1550,5</b> |
| WNT10A  | -1,077822 | NaN       | <b>-1,077822</b>  | 1192 | NaN  | <b>1192</b>   |
| ATG16L1 | -1,722711 | -0,432553 | <b>-1,077632</b>  | 1767 | 1922 | <b>1844,5</b> |
| TP53BP2 | -1,909878 | -0,24509  | <b>-1,077484</b>  | 1586 | 1987 | <b>1786,5</b> |
| DCAF11  | -0,092692 | -2,0622   | <b>-1,077446</b>  | 2009 | 2294 | <b>2151,5</b> |
| MAN1B1  | -1,050985 | -1,103754 | <b>-1,0773695</b> | 1327 | 1857 | <b>1592</b>   |
| OR5AR1  | -0,65664  | -1,498096 | <b>-1,077368</b>  | 1840 | 2651 | <b>2245,5</b> |
| RIMKLA  | -1,076665 | NaN       | <b>-1,076665</b>  | 1580 | NaN  | <b>1580</b>   |
| CLDN7   | -1,759969 | -0,391934 | <b>-1,0759515</b> | 1464 | 1812 | <b>1638</b>   |

|         |           |           |                   |      |      |               |
|---------|-----------|-----------|-------------------|------|------|---------------|
| FAM47A  | -1,007391 | -1,14427  | <b>-1,0758305</b> | 1288 | 1851 | <b>1569,5</b> |
| CDC37L1 | -1,075814 | NaN       | <b>-1,075814</b>  | 1786 | NaN  | <b>1786</b>   |
| AASDH   | -0,698809 | -1,452338 | <b>-1,0755735</b> | 1771 | 2117 | <b>1944</b>   |
| OR52E2  | -1,074988 | NaN       | <b>-1,074988</b>  | 1532 | NaN  | <b>1532</b>   |
| DHX34   | -1,17295  | -0,974778 | <b>-1,073864</b>  | 1632 | 2353 | <b>1992,5</b> |
| OSTF1   | -0,941006 | -1,2061   | <b>-1,073553</b>  | 2078 | 2258 | <b>2168</b>   |
| OR1A2   | -1,073272 | NaN       | <b>-1,073272</b>  | 1598 | NaN  | <b>1598</b>   |
| NPBWR2  | -1,073266 | NaN       | <b>-1,073266</b>  | 1680 | NaN  | <b>1680</b>   |
| DHX30   | -0,783603 | -1,362854 | <b>-1,0732285</b> | 1662 | 1973 | <b>1817,5</b> |
| SELK    | -0,607136 | -1,5381   | <b>-1,072618</b>  | 1946 | 2212 | <b>2079</b>   |
| RPL10L  | -1,0768   | -1,068238 | <b>-1,072519</b>  | 820  | 1387 | <b>1103,5</b> |
| WNT9A   | -1,071689 | NaN       | <b>-1,071689</b>  | 1367 | NaN  | <b>1367</b>   |
| FBXO10  | -0,972344 | -1,169923 | <b>-1,0711335</b> | 1698 | 2777 | <b>2237,5</b> |
| SBNO1   | -0,663607 | -1,478614 | <b>-1,0711105</b> | 1867 | 2637 | <b>2252</b>   |
| CPSF6   | -1,070916 | NaN       | <b>-1,070916</b>  | 1296 | NaN  | <b>1296</b>   |
| MKLN1   | -0,790276 | -1,351537 | <b>-1,0709065</b> | 1636 | 1038 | <b>1337</b>   |
| MUT     | -1,285584 | -0,855806 | <b>-1,070695</b>  | 2099 | 1991 | <b>2045</b>   |
| SIL1    | -1,07     | NaN       | <b>-1,07</b>      | 1368 | NaN  | <b>1368</b>   |
| ALDH1B1 | -1,686385 | -0,453234 | <b>-1,0698095</b> | 1825 | 1907 | <b>1866</b>   |
| TBC1D16 | -0,719896 | -1,419627 | <b>-1,0697615</b> | 1561 | 1500 | <b>1530,5</b> |
| HDAC1   | -1,395298 | -0,740839 | <b>-1,0680685</b> | 2093 | 2178 | <b>2135,5</b> |
| TMEM18  | -1,300436 | -0,835577 | <b>-1,0680065</b> | 1634 | 1975 | <b>1804,5</b> |
| FAM92B  | -1,067006 | NaN       | <b>-1,067006</b>  | 1806 | NaN  | <b>1806</b>   |
| NADSYN1 | -1,337669 | -0,795172 | <b>-1,0664205</b> | 1364 | 2138 | <b>1751</b>   |
| GTF3C6  | -1,405732 | -0,72656  | <b>-1,066146</b>  | 1226 | 1468 | <b>1347</b>   |
| TMED1   | -0,697785 | -1,433335 | <b>-1,06556</b>   | 1887 | 2772 | <b>2329,5</b> |
| RPF1    | -1,146535 | -0,984505 | <b>-1,06552</b>   | 1433 | 2033 | <b>1733</b>   |
| RALGPS2 | -0,694065 | -1,436753 | <b>-1,065409</b>  | 1444 | 2159 | <b>1801,5</b> |
| BEST1   | -1,065207 | NaN       | <b>-1,065207</b>  | 1796 | NaN  | <b>1796</b>   |
| APC     | -0,902908 | -1,225627 | <b>-1,0642675</b> | 1372 | 2538 | <b>1955</b>   |
| ALDOA   | -0,609663 | -1,518717 | <b>-1,06419</b>   | 813  | 1681 | <b>1247</b>   |
| LIPI    | -1,57559  | -0,552534 | <b>-1,064062</b>  | 1777 | 2907 | <b>2342</b>   |
| SH2D3A  | -1,06366  | NaN       | <b>-1,06366</b>   | 1203 | NaN  | <b>1203</b>   |
| ATP11C  | -1,019576 | -1,107539 | <b>-1,0635575</b> | 1575 | 1808 | <b>1691,5</b> |

|          |           |           |                   |      |      |               |
|----------|-----------|-----------|-------------------|------|------|---------------|
| YTHDF2   | -0,437178 | -1,689476 | <b>-1,063327</b>  | 1267 | 1686 | <b>1476,5</b> |
| MUC4     | -1,497323 | -0,628293 | <b>-1,062808</b>  | 2226 | 2185 | <b>2205,5</b> |
| TGM5     | -1,632965 | -0,491981 | <b>-1,062473</b>  | 1410 | 1478 | <b>1444</b>   |
| PLEK     | -1,332059 | -0,792529 | <b>-1,062294</b>  | 1393 | 1919 | <b>1656</b>   |
| ST3GAL2  | NaN       | -1,061979 | <b>-1,061979</b>  | NaN  | 2403 | <b>2403</b>   |
| CTU1     | -1,047369 | -1,076413 | <b>-1,061891</b>  | 2059 | 2426 | <b>2242,5</b> |
| CDH2     | -1,007242 | -1,115002 | <b>-1,061122</b>  | 1815 | 2598 | <b>2206,5</b> |
| ARHGEF26 | -0,214855 | -1,906436 | <b>-1,0606455</b> | 1503 | 2164 | <b>1833,5</b> |
| PPFIA3   | -1,273243 | -0,847589 | <b>-1,060416</b>  | 1772 | 2220 | <b>1996</b>   |
| WNT2B    | -1,440871 | -0,679358 | <b>-1,0601145</b> | 1116 | 1907 | <b>1511,5</b> |
| KBTBD2   | -1,264942 | -0,854991 | <b>-1,0599665</b> | 1147 | 894  | <b>1020,5</b> |
| GRIN2B   | -1,302952 | -0,81685  | <b>-1,059901</b>  | 2345 | 3159 | <b>2752</b>   |
| R3HDM1   | -1,359554 | -0,7598   | <b>-1,059677</b>  | 1801 | 2968 | <b>2384,5</b> |
| PSMA8    | -1,624646 | -0,494039 | <b>-1,0593425</b> | 1783 | 2243 | <b>2013</b>   |
| HOXA1    | -0,954974 | -1,163306 | <b>-1,05914</b>   | 1446 | 2509 | <b>1977,5</b> |
| C13orf26 | -0,402791 | -1,71407  | <b>-1,0584305</b> | 1510 | 1784 | <b>1647</b>   |
| REPIN1   | -0,868595 | -1,24815  | <b>-1,0583725</b> | 1704 | 1839 | <b>1771,5</b> |
| KRT28    | -1,058163 | NaN       | <b>-1,058163</b>  | 1556 | NaN  | <b>1556</b>   |
| SLC35B4  | -1,985553 | -0,130635 | <b>-1,058094</b>  | 1222 | 1660 | <b>1441</b>   |
| RER1     | -1,991288 | -0,123805 | <b>-1,0575465</b> | 1587 | 1691 | <b>1639</b>   |
| SETD2    | -0,879023 | -1,235882 | <b>-1,0574525</b> | 1481 | 2000 | <b>1740,5</b> |
| MPHOSPH8 | -0,94784  | -1,167005 | <b>-1,0574225</b> | 1696 | 2233 | <b>1964,5</b> |
| TMIE     | -0,851265 | -1,263521 | <b>-1,057393</b>  | 1577 | 1970 | <b>1773,5</b> |
| MAPK11   | -1,153739 | -0,961042 | <b>-1,0573905</b> | 1727 | 1946 | <b>1836,5</b> |
| MUC2     | 0,154936  | -2,268957 | <b>-1,0570105</b> | 2008 | 2860 | <b>2434</b>   |
| ARID1B   | -1,358305 | -0,755595 | <b>-1,05695</b>   | 1744 | 2234 | <b>1989</b>   |
| IFT46    | -1,056743 | NaN       | <b>-1,056743</b>  | 1376 | NaN  | <b>1376</b>   |
| DMBT1    | -1,203799 | -0,908639 | <b>-1,056219</b>  | 2083 | 2300 | <b>2191,5</b> |
| TLR2     | -1,199847 | -0,912528 | <b>-1,0561875</b> | 2122 | 2187 | <b>2154,5</b> |
| RBPJL    | 0,578777  | -2,690703 | <b>-1,055963</b>  | 1860 | 2380 | <b>2120</b>   |
| THADA    | -1,173511 | -0,93832  | <b>-1,0559155</b> | 1585 | 1682 | <b>1633,5</b> |
| C17orf74 | -1,015087 | -1,096524 | <b>-1,0558055</b> | 1873 | 1914 | <b>1893,5</b> |
| MAP4K2   | -0,257774 | -1,853539 | <b>-1,0556565</b> | 1772 | 2034 | <b>1903</b>   |
| ST8SIA3  | -1,537317 | -0,573563 | <b>-1,05544</b>   | 1880 | 2005 | <b>1942,5</b> |

|          |           |           |                   |      |      |               |
|----------|-----------|-----------|-------------------|------|------|---------------|
| BOP1     | -0,618987 | -1,490848 | <b>-1,0549175</b> | 1353 | 1756 | <b>1554,5</b> |
| PPP3R1   | -0,903583 | -1,206007 | <b>-1,054795</b>  | 1717 | 2175 | <b>1946</b>   |
| SCAF4    | -1,24001  | -0,868983 | <b>-1,0544965</b> | 1562 | 2099 | <b>1830,5</b> |
| GEMIN7   | -1,259565 | -0,847832 | <b>-1,0536985</b> | 2111 | 2107 | <b>2109</b>   |
| XPOT     | -1,053382 | NaN       | <b>-1,053382</b>  | 1717 | NaN  | <b>1717</b>   |
| RPS6KA4  | -1,372755 | -0,733253 | <b>-1,053004</b>  | 1650 | 1889 | <b>1769,5</b> |
| NRIP1    | -1,754865 | -0,351132 | <b>-1,0529985</b> | 1576 | 1755 | <b>1665,5</b> |
| XK       | -1,298464 | -0,806856 | <b>-1,05266</b>   | 1268 | 2861 | <b>2064,5</b> |
| MRPL38   | -1,25768  | -0,847623 | <b>-1,0526515</b> | 1353 | 1891 | <b>1622</b>   |
| FBXL4    | -1,567978 | -0,536563 | <b>-1,0522705</b> | 1930 | 2941 | <b>2435,5</b> |
| ITGA3    | -1,726008 | -0,378498 | <b>-1,052253</b>  | 1838 | 1909 | <b>1873,5</b> |
| LDHAL6A  | -1,057491 | -1,045435 | <b>-1,051463</b>  | 1714 | 2441 | <b>2077,5</b> |
| PPP1R13L | -1,148247 | -0,953758 | <b>-1,0510025</b> | 1518 | 2550 | <b>2034</b>   |
| KARS     | -1,167124 | -0,934044 | <b>-1,050584</b>  | 1188 | 1869 | <b>1528,5</b> |
| MCF2     | -1,074439 | -1,026196 | <b>-1,0503175</b> | 1466 | 1664 | <b>1565</b>   |
| RPL15    | -1,050268 | NaN       | <b>-1,050268</b>  | 2578 | NaN  | <b>2578</b>   |
| LHFP     | -1,089705 | -1,010679 | <b>-1,050192</b>  | 1064 | 1211 | <b>1137,5</b> |
| HADHB    | -0,924129 | -1,176223 | <b>-1,050176</b>  | 1511 | 1806 | <b>1658,5</b> |
| FRZB     | -1,331928 | -0,768048 | <b>-1,049988</b>  | 1457 | 1720 | <b>1588,5</b> |
| LOR      | -1,731665 | -0,367086 | <b>-1,0493755</b> | 1748 | 1619 | <b>1683,5</b> |
| MED10    | -1,668822 | -0,429817 | <b>-1,0493195</b> | 1769 | 2688 | <b>2228,5</b> |
| DPYS     | -1,165535 | -0,932883 | <b>-1,049209</b>  | 1526 | 2115 | <b>1820,5</b> |
| FIP1L1   | -1,080031 | -1,018363 | <b>-1,049197</b>  | 1936 | 2355 | <b>2145,5</b> |
| ABI2     | -0,947567 | -1,150448 | <b>-1,0490075</b> | 1791 | 1828 | <b>1809,5</b> |
| CMKLR1   | -1,247706 | -0,849251 | <b>-1,0484785</b> | 1300 | 1530 | <b>1415</b>   |
| C18orf19 | -0,639379 | -1,456531 | <b>-1,047955</b>  | 1499 | 1861 | <b>1680</b>   |
| IL13     | -0,099572 | -1,995304 | <b>-1,047438</b>  | 1539 | 1635 | <b>1587</b>   |
| LCN8     | -1,034265 | -1,059641 | <b>-1,046953</b>  | 1588 | 2254 | <b>1921</b>   |
| HSD17B3  | -1,49894  | -0,593685 | <b>-1,0463125</b> | 1820 | 2367 | <b>2093,5</b> |
| TOB2     | -1,292413 | -0,800089 | <b>-1,046251</b>  | 1715 | 2859 | <b>2287</b>   |
| SMAD6    | -0,441132 | -1,651323 | <b>-1,0462275</b> | 1184 | 2704 | <b>1944</b>   |
| LIN9     | -1,045903 | NaN       | <b>-1,045903</b>  | 1434 | NaN  | <b>1434</b>   |
| C1QA     | -1,19385  | -0,897176 | <b>-1,045513</b>  | 1437 | 1924 | <b>1680,5</b> |
| NSMCE4A  | -1,076058 | -1,014243 | <b>-1,0451505</b> | 1179 | 1419 | <b>1299</b>   |

|         |           |           |                   |      |      |               |
|---------|-----------|-----------|-------------------|------|------|---------------|
| MTX2    | -0,90064  | -1,188851 | <b>-1,0447455</b> | 1824 | 2216 | <b>2020</b>   |
| 01-sept | -0,794343 | -1,295033 | <b>-1,044688</b>  | 1771 | 2249 | <b>2010</b>   |
| FOXN3   | -1,314205 | -0,774609 | <b>-1,044407</b>  | 1066 | 1805 | <b>1435,5</b> |
| KSR1    | -1,086319 | -1,002034 | <b>-1,0441765</b> | 1604 | 2266 | <b>1935</b>   |
| GOLGA2  | -1,447747 | -0,640045 | <b>-1,043896</b>  | 777  | 1186 | <b>981,5</b>  |
| HAAO    | NaN       | -1,043536 | <b>-1,043536</b>  | NaN  | 3119 | <b>3119</b>   |
| PMPCA   | -1,346037 | -0,740346 | <b>-1,0431915</b> | 1545 | 1544 | <b>1544,5</b> |
| SLC39A1 | -0,847469 | -1,238126 | <b>-1,0427975</b> | 1655 | 2119 | <b>1887</b>   |
| TRPM3   | -0,103901 | -1,980908 | <b>-1,0424045</b> | 1333 | 2858 | <b>2095,5</b> |
| FER1L5  | -1,042353 | NaN       | <b>-1,042353</b>  | 1630 | NaN  | <b>1630</b>   |
| PTP4A1  | -0,442818 | -1,641508 | <b>-1,042163</b>  | 1710 | 2022 | <b>1866</b>   |
| AQP3    | -1,371247 | -0,712669 | <b>-1,041958</b>  | 1436 | 1727 | <b>1581,5</b> |
| EPM2A   | -1,193933 | -0,889776 | <b>-1,0418545</b> | 1476 | 2375 | <b>1925,5</b> |
| DENND4A | -0,767579 | -1,315642 | <b>-1,0416105</b> | 1460 | 1885 | <b>1672,5</b> |
| DCUN1D3 | -1,24135  | -0,841854 | <b>-1,041602</b>  | 995  | 1774 | <b>1384,5</b> |
| LLGL2   | -0,771011 | -1,310935 | <b>-1,040973</b>  | 1675 | 2358 | <b>2016,5</b> |
| EXT1    | -1,591585 | -0,489473 | <b>-1,040529</b>  | 1451 | 2274 | <b>1862,5</b> |
| FANCI   | -1,648086 | -0,432431 | <b>-1,0402585</b> | 1287 | 1820 | <b>1553,5</b> |
| CELF4   | -1,172921 | -0,907531 | <b>-1,040226</b>  | 1383 | 2135 | <b>1759</b>   |
| DFNA5   | -1,039162 | NaN       | <b>-1,039162</b>  | 1848 | NaN  | <b>1848</b>   |
| CABP1   | -1,233851 | -0,843571 | <b>-1,038711</b>  | 1698 | 2257 | <b>1977,5</b> |
| KRT33A  | -0,839792 | -1,237608 | <b>-1,0387</b>    | 1226 | 1878 | <b>1552</b>   |
| NRK     | -0,053672 | -2,023594 | <b>-1,038633</b>  | 1784 | 1898 | <b>1841</b>   |
| COX11   | -1,219444 | -0,857165 | <b>-1,0383045</b> | 1697 | 1638 | <b>1667,5</b> |
| CCDC43  | -1,037963 | NaN       | <b>-1,037963</b>  | 1489 | NaN  | <b>1489</b>   |
| GCNT3   | -0,975747 | -1,099882 | <b>-1,0378145</b> | 1463 | 1940 | <b>1701,5</b> |
| ELAVL2  | -1,037194 | NaN       | <b>-1,037194</b>  | 1829 | NaN  | <b>1829</b>   |
| ONECUT2 | -0,983019 | -1,090321 | <b>-1,03667</b>   | 1401 | 1710 | <b>1555,5</b> |
| APC2    | -0,849481 | -1,222737 | <b>-1,036109</b>  | 1416 | 2154 | <b>1785</b>   |
| RAB25   | -0,956674 | -1,115328 | <b>-1,036001</b>  | 1641 | 1751 | <b>1696</b>   |
| MARK4   | -1,234014 | -0,83773  | <b>-1,035872</b>  | 1077 | 1720 | <b>1398,5</b> |
| SLC45A3 | -0,932071 | -1,139329 | <b>-1,0357</b>    | 1932 | 1992 | <b>1962</b>   |
| PLA2G2D | -0,810478 | -1,260397 | <b>-1,0354375</b> | 1459 | 2402 | <b>1930,5</b> |
| CREG1   | -0,265118 | -1,805595 | <b>-1,0353565</b> | 1860 | 1860 | <b>1860</b>   |

|          |           |           |                   |      |      |               |
|----------|-----------|-----------|-------------------|------|------|---------------|
| ANKDD1A  | -1,035145 | NaN       | <b>-1,035145</b>  | 1467 | NaN  | <b>1467</b>   |
| GPD2     | -0,250551 | -1,819434 | <b>-1,0349925</b> | 1922 | 1864 | <b>1893</b>   |
| ZNF681   | -0,947805 | -1,122094 | <b>-1,0349495</b> | 2122 | 2034 | <b>2078</b>   |
| DSPP     | -1,311469 | -0,757681 | <b>-1,034575</b>  | 1770 | 2115 | <b>1942,5</b> |
| GLG1     | -1,455695 | -0,613266 | <b>-1,0344805</b> | 1398 | 1496 | <b>1447</b>   |
| ZNF572   | -1,358281 | -0,710495 | <b>-1,034388</b>  | 1471 | 2199 | <b>1835</b>   |
| C1orf31  | -1,092651 | -0,976077 | <b>-1,034364</b>  | 2176 | 2645 | <b>2410,5</b> |
| C5orf38  | -1,557054 | -0,511627 | <b>-1,0343405</b> | 824  | 1697 | <b>1260,5</b> |
| PPP1R11  | -1,490891 | -0,577424 | <b>-1,0341575</b> | 1830 | 1882 | <b>1856</b>   |
| GPR65    | -1,033885 | NaN       | <b>-1,033885</b>  | 1724 | NaN  | <b>1724</b>   |
| RUSC2    | -0,833724 | -1,233882 | <b>-1,033803</b>  | 1538 | 1857 | <b>1697,5</b> |
| SPIRE2   | -1,294261 | -0,773286 | <b>-1,0337735</b> | 764  | 790  | <b>777</b>    |
| TBCK     | -1,329519 | -0,737534 | <b>-1,0335265</b> | 1795 | 1856 | <b>1825,5</b> |
| EXOC3    | -1,511019 | -0,555942 | <b>-1,0334805</b> | 1863 | 2785 | <b>2324</b>   |
| GPR174   | -1,03242  | NaN       | <b>-1,03242</b>   | 1769 | NaN  | <b>1769</b>   |
| RBM26    | -1,031838 | NaN       | <b>-1,031838</b>  | 1562 | NaN  | <b>1562</b>   |
| MKX      | -1,496267 | -0,567046 | <b>-1,0316565</b> | 1707 | 1806 | <b>1756,5</b> |
| GNL3L    | -1,031521 | NaN       | <b>-1,031521</b>  | 1452 | NaN  | <b>1452</b>   |
| FAM160B2 | -0,759874 | -1,30259  | <b>-1,031232</b>  | 1987 | 2409 | <b>2198</b>   |
| GTSF1L   | -0,656902 | -1,40499  | <b>-1,030946</b>  | 1637 | 1991 | <b>1814</b>   |
| SPINT3   | -1,255065 | -0,806609 | <b>-1,030837</b>  | 1525 | 2153 | <b>1839</b>   |
| TMEM164  | -0,917123 | -1,144372 | <b>-1,0307475</b> | 1374 | 2024 | <b>1699</b>   |
| HTR4     | -1,030159 | NaN       | <b>-1,030159</b>  | 1452 | NaN  | <b>1452</b>   |
| CHCHD7   | -1,456223 | -0,604029 | <b>-1,030126</b>  | 1407 | 1883 | <b>1645</b>   |
| LRP5L    | -1,295526 | -0,764535 | <b>-1,0300305</b> | 1517 | 2497 | <b>2007</b>   |
| PDSS1    | -1,730447 | -0,329237 | <b>-1,029842</b>  | 1234 | 1884 | <b>1559</b>   |
| PIN1     | -2,058931 | 0,000109  | <b>-1,029411</b>  | 1723 | 1928 | <b>1825,5</b> |
| TFCP2    | -1,173871 | -0,884676 | <b>-1,0292735</b> | 1071 | 1532 | <b>1301,5</b> |
| KLK12    | -0,70965  | -1,348728 | <b>-1,029189</b>  | 1630 | 2136 | <b>1883</b>   |
| GPR85    | -1,02886  | NaN       | <b>-1,02886</b>   | 1604 | NaN  | <b>1604</b>   |
| KLK15    | -1,66353  | -0,393721 | <b>-1,0286255</b> | 2124 | 2594 | <b>2359</b>   |
| LGI4     | -1,147802 | -0,909155 | <b>-1,0284785</b> | 956  | 1744 | <b>1350</b>   |
| YIPF3    | -1,300281 | -0,756079 | <b>-1,02818</b>   | 2004 | 2123 | <b>2063,5</b> |
| NSMCE2   | -1,299514 | -0,756418 | <b>-1,027966</b>  | 1665 | 3037 | <b>2351</b>   |

|          |           |           |                   |      |      |               |
|----------|-----------|-----------|-------------------|------|------|---------------|
| HDGFRP2  | -1,083435 | -0,972088 | <b>-1,0277615</b> | 1395 | 1952 | <b>1673,5</b> |
| PFAS     | -0,714559 | -1,340236 | <b>-1,0273975</b> | 1648 | 2116 | <b>1882</b>   |
| IKZF4    | -1,026716 | NaN       | <b>-1,026716</b>  | 1944 | NaN  | <b>1944</b>   |
| H6PD     | -1,174628 | -0,8777   | <b>-1,026164</b>  | 1595 | 1740 | <b>1667,5</b> |
| FAM164C  | -0,833307 | -1,218842 | <b>-1,0260745</b> | 1605 | 2218 | <b>1911,5</b> |
| ZBTB3    | -1,550392 | -0,501463 | <b>-1,0259275</b> | 1583 | 2522 | <b>2052,5</b> |
| TFAP4    | -1,777336 | -0,274016 | <b>-1,025676</b>  | 1496 | 1265 | <b>1380,5</b> |
| OR10K2   | -0,56889  | -1,481756 | <b>-1,025323</b>  | 1309 | 2242 | <b>1775,5</b> |
| PLD3     | -1,010933 | -1,039336 | <b>-1,0251345</b> | 1568 | 2573 | <b>2070,5</b> |
| IGFL4    | -1,015245 | -1,032911 | <b>-1,024078</b>  | 1488 | 2199 | <b>1843,5</b> |
| STX11    | -1,024033 | NaN       | <b>-1,024033</b>  | 1550 | NaN  | <b>1550</b>   |
| SDK1     | -0,584072 | -1,463623 | <b>-1,0238475</b> | 1879 | 1802 | <b>1840,5</b> |
| RSL24D1  | -0,776868 | -1,270247 | <b>-1,0235575</b> | 1440 | 1690 | <b>1565</b>   |
| GRHPR    | -1,261539 | -0,785042 | <b>-1,0232905</b> | 1101 | 1870 | <b>1485,5</b> |
| SEC24D   | -1,157955 | -0,888249 | <b>-1,023102</b>  | 1592 | 2166 | <b>1879</b>   |
| C9orf150 | -0,152581 | -1,893234 | <b>-1,0229075</b> | 1340 | 1994 | <b>1667</b>   |
| ETAA1    | -1,071336 | -0,973767 | <b>-1,0225515</b> | 1845 | 2535 | <b>2190</b>   |
| PLXDC2   | -1,599059 | -0,445615 | <b>-1,022337</b>  | 1058 | 1378 | <b>1218</b>   |
| ERO1L    | -0,633009 | -1,411633 | <b>-1,022321</b>  | 879  | 1426 | <b>1152,5</b> |
| SLC9A8   | -1,623626 | -0,420503 | <b>-1,0220645</b> | 1415 | 1052 | <b>1233,5</b> |
| SLC27A2  | -0,534758 | -1,508618 | <b>-1,021688</b>  | 2239 | 2311 | <b>2275</b>   |
| SEC13    | -0,908076 | -1,135139 | <b>-1,0216075</b> | 1226 | 1569 | <b>1397,5</b> |
| S100PBP  | -1,021073 | NaN       | <b>-1,021073</b>  | 1592 | NaN  | <b>1592</b>   |
| MFSD10   | -0,323458 | -1,716775 | <b>-1,0201165</b> | 838  | 2081 | <b>1459,5</b> |
| ADRA1B   | -1,019636 | NaN       | <b>-1,019636</b>  | 1086 | NaN  | <b>1086</b>   |
| C8orf84  | -1,021674 | -1,017409 | <b>-1,0195415</b> | 1359 | 1884 | <b>1621,5</b> |
| DLX3     | -1,540156 | -0,498874 | <b>-1,019515</b>  | 1561 | 2253 | <b>1907</b>   |
| TG       | -1,075846 | -0,963068 | <b>-1,019457</b>  | 844  | 1069 | <b>956,5</b>  |
| PGP      | -1,06195  | -0,976351 | <b>-1,0191505</b> | 1698 | 1965 | <b>1831,5</b> |
| BPHL     | -1,011722 | -1,026485 | <b>-1,0191035</b> | 1443 | 1741 | <b>1592</b>   |
| GRIN2C   | -0,807461 | -1,230394 | <b>-1,0189275</b> | 1255 | 1655 | <b>1455</b>   |
| MAPK1    | -0,950851 | -1,085104 | <b>-1,0179775</b> | 1501 | 2065 | <b>1783</b>   |
| HIST1H1C | -0,811121 | -1,22435  | <b>-1,0177355</b> | 1976 | 1825 | <b>1900,5</b> |
| SEC23B   | -1,984721 | -0,050688 | <b>-1,0177045</b> | 1190 | 1746 | <b>1468</b>   |



|          |           |           |                   |      |      |               |
|----------|-----------|-----------|-------------------|------|------|---------------|
| CCDC109B | -1,031504 | -1,003841 | <b>-1,0176725</b> | 1683 | 1947 | <b>1815</b>   |
| FSHR     | -0,303133 | -1,732042 | <b>-1,0175875</b> | 1923 | 2225 | <b>2074</b>   |
| FAM46C   | -1,015606 | -1,019153 | <b>-1,0173795</b> | 1576 | 1910 | <b>1743</b>   |
| SLC41A3  | -1,389027 | -0,64534  | <b>-1,0171835</b> | 1754 | 1952 | <b>1853</b>   |
| VWA1     | -0,746127 | -1,287247 | <b>-1,016687</b>  | 1578 | 1751 | <b>1664,5</b> |
| BTC      | -1,169885 | -0,862853 | <b>-1,016369</b>  | 1353 | 2031 | <b>1692</b>   |
| CADPS2   | -0,501974 | -1,530241 | <b>-1,0161075</b> | 1399 | 1922 | <b>1660,5</b> |
| TSNAXIP1 | -0,635196 | -1,396501 | <b>-1,0158485</b> | 1738 | 1946 | <b>1842</b>   |
| BAZ1A    | -0,924455 | -1,105186 | <b>-1,0148205</b> | 1244 | 1319 | <b>1281,5</b> |
| RRP12    | -1,014128 | NaN       | <b>-1,014128</b>  | 1429 | NaN  | <b>1429</b>   |
| BCL2L13  | -1,276161 | -0,751506 | <b>-1,0138335</b> | 2177 | 1851 | <b>2014</b>   |
| C6orf130 | -1,013524 | NaN       | <b>-1,013524</b>  | 1644 | NaN  | <b>1644</b>   |
| FLG2     | -1,012526 | NaN       | <b>-1,012526</b>  | 1721 | NaN  | <b>1721</b>   |
| PEX11B   | -0,921954 | -1,102977 | <b>-1,0124655</b> | 1307 | 1821 | <b>1564</b>   |
| RAB3GAP1 | -1,162613 | -0,860792 | <b>-1,0117025</b> | 1580 | 1676 | <b>1628</b>   |
| PDGFD    | -1,011452 | NaN       | <b>-1,011452</b>  | 1268 | NaN  | <b>1268</b>   |
| MOV10L1  | -2,450982 | 0,428391  | <b>-1,0112955</b> | 195  | 2026 | <b>1110,5</b> |
| ACSM1    | -0,903073 | -1,118524 | <b>-1,0107985</b> | 1167 | 2017 | <b>1592</b>   |
| RALB     | -1,316358 | -0,704956 | <b>-1,010657</b>  | 1526 | 2356 | <b>1941</b>   |
| ERH      | -1,306907 | -0,714257 | <b>-1,010582</b>  | 1729 | 1490 | <b>1609,5</b> |
| SPP1     | -1,260493 | -0,7605   | <b>-1,0104965</b> | 1252 | 2038 | <b>1645</b>   |
| TMEM111  | -1,010186 | NaN       | <b>-1,010186</b>  | 1402 | NaN  | <b>1402</b>   |
| TP73     | -1,147832 | -0,872106 | <b>-1,009969</b>  | 1420 | 2038 | <b>1729</b>   |
| RAB39B   | -1,102025 | -0,916884 | <b>-1,0094545</b> | 1495 | 2255 | <b>1875</b>   |
| C4orf17  | -0,778536 | -1,240118 | <b>-1,009327</b>  | 1789 | 2832 | <b>2310,5</b> |
| TOP3B    | -1,694399 | -0,32394  | <b>-1,0091695</b> | 1401 | 1963 | <b>1682</b>   |
| MKRN2    | -0,710777 | -1,306687 | <b>-1,008732</b>  | 1498 | 2013 | <b>1755,5</b> |
| FILIP1   | -1,151099 | -0,866357 | <b>-1,008728</b>  | 1695 | 1685 | <b>1690</b>   |
| MMP26    | -0,870651 | -1,146345 | <b>-1,008498</b>  | 754  | 1629 | <b>1191,5</b> |
| CD47     | -2,088412 | 0,071796  | <b>-1,008308</b>  | 1844 | 2064 | <b>1954</b>   |
| SZT2     | -1,365951 | -0,650559 | <b>-1,008255</b>  | 1732 | 1633 | <b>1682,5</b> |
| ITGA8    | -1,330084 | -0,685686 | <b>-1,007885</b>  | 1588 | 2162 | <b>1875</b>   |
| CEP70    | -1,255737 | -0,759823 | <b>-1,00778</b>   | 1524 | 1737 | <b>1630,5</b> |
| ZNF136   | -0,695746 | -1,31948  | <b>-1,007613</b>  | 807  | 1414 | <b>1110,5</b> |

|          |           |           |                   |      |      |               |
|----------|-----------|-----------|-------------------|------|------|---------------|
| CXCR4    | -1,006869 | NaN       | <b>-1,006869</b>  | 1480 | NaN  | <b>1480</b>   |
| DGKE     | -1,572514 | -0,441092 | <b>-1,006803</b>  | 1729 | 2702 | <b>2215,5</b> |
| LSP1     | -0,504573 | -1,508363 | <b>-1,006468</b>  | 1917 | 2271 | <b>2094</b>   |
| APOM     | -0,588657 | -1,424183 | <b>-1,00642</b>   | 1307 | 1792 | <b>1549,5</b> |
| KCNK15   | -0,188101 | -1,824209 | <b>-1,006155</b>  | 1785 | 3091 | <b>2438</b>   |
| CALML3   | -1,233869 | -0,778346 | <b>-1,0061075</b> | 1358 | 1974 | <b>1666</b>   |
| MYRIP    | -1,514384 | -0,497696 | <b>-1,00604</b>   | 1696 | 2171 | <b>1933,5</b> |
| DLG3     | -1,39699  | -0,615081 | <b>-1,0060355</b> | 1585 | 1651 | <b>1618</b>   |
| NR1H4    | -1,321456 | -0,690148 | <b>-1,005802</b>  | 1590 | 2692 | <b>2141</b>   |
| ATP6V1E1 | -1,1207   | -0,889941 | <b>-1,0053205</b> | 1202 | 2136 | <b>1669</b>   |
| APCDD1   | -0,589329 | -1,421272 | <b>-1,0053005</b> | 1299 | 1999 | <b>1649</b>   |
| UCKL1    | -1,0618   | -0,948665 | <b>-1,0052325</b> | 1083 | 1476 | <b>1279,5</b> |
| ULK1     | -1,05178  | -0,958455 | <b>-1,0051175</b> | 832  | 1276 | <b>1054</b>   |
| CSF3     | -1,0238   | -0,986224 | <b>-1,005012</b>  | 1121 | 1324 | <b>1222,5</b> |
| KBTBD7   | -0,887422 | -1,122174 | <b>-1,004798</b>  | 2010 | 2308 | <b>2159</b>   |
| SLC12A7  | -0,612431 | -1,396693 | <b>-1,004562</b>  | 1833 | 2115 | <b>1974</b>   |
| BCL2L15  | -1,004201 | NaN       | <b>-1,004201</b>  | 1433 | NaN  | <b>1433</b>   |
| PIAS4    | -0,69359  | -1,314685 | <b>-1,0041375</b> | 1185 | 1679 | <b>1432</b>   |
| HBM      | -0,414429 | -1,593418 | <b>-1,0039235</b> | 1648 | 1707 | <b>1677,5</b> |
| NUDT8    | -1,003895 | NaN       | <b>-1,003895</b>  | 1337 | NaN  | <b>1337</b>   |
| AP3S1    | -0,940943 | -1,065956 | <b>-1,0034495</b> | 1822 | 2423 | <b>2122,5</b> |
| FMNL1    | -1,084309 | -0,92201  | <b>-1,0031595</b> | 1622 | 2500 | <b>2061</b>   |
| ZNF763   | -1,003013 | NaN       | <b>-1,003013</b>  | 1263 | NaN  | <b>1263</b>   |
| ACBD6    | -1,493357 | -0,512033 | <b>-1,002695</b>  | 979  | 1503 | <b>1241</b>   |
| ABTB1    | -0,470434 | -1,534279 | <b>-1,0023565</b> | 1948 | 3195 | <b>2571,5</b> |
| FOXJ1    | -1,267306 | -0,737297 | <b>-1,0023015</b> | 544  | 1907 | <b>1225,5</b> |
| CDH4     | -1,347957 | -0,655828 | <b>-1,0018925</b> | 1496 | 1821 | <b>1658,5</b> |
| CENPK    | -1,001326 | NaN       | <b>-1,001326</b>  | 1525 | NaN  | <b>1525</b>   |
| LRRC40   | -1,352726 | -0,649844 | <b>-1,001285</b>  | 1621 | 2214 | <b>1917,5</b> |
| OR1L8    | -1,22258  | -0,778738 | <b>-1,000659</b>  | 1790 | 2477 | <b>2133,5</b> |
| ASB1     | -1,792738 | -0,20849  | <b>-1,000614</b>  | 1608 | 2012 | <b>1810</b>   |
| PRPF39   | -1,367073 | -0,632919 | <b>-0,999996</b>  | 1854 | 2186 | <b>2020</b>   |
| MAGI2    | -0,511706 | -1,48804  | <b>-0,999873</b>  | 1401 | 1977 | <b>1689</b>   |
| TEAD4    | -0,829663 | -1,169533 | <b>-0,999598</b>  | 1887 | 1635 | <b>1761</b>   |

|            |           |           |                   |      |      |               |
|------------|-----------|-----------|-------------------|------|------|---------------|
| THOP1      | -0,51935  | -1,47885  | <b>-0,9991</b>    | 1600 | 2516 | <b>2058</b>   |
| MFSD3      | -2,059517 | 0,061635  | <b>-0,998941</b>  | 1956 | 1674 | <b>1815</b>   |
| C14orf166B | -0,998877 | NaN       | <b>-0,998877</b>  | 1586 | NaN  | <b>1586</b>   |
| PSENE1     | -1,121371 | -0,875724 | <b>-0,9985475</b> | 1381 | 2008 | <b>1694,5</b> |
| C6orf127   | -1,379074 | -0,61713  | <b>-0,998102</b>  | 1735 | 1895 | <b>1815</b>   |
| TSHZ3      | -0,997117 | NaN       | <b>-0,997117</b>  | 1090 | NaN  | <b>1090</b>   |
| LPO        | -1,095624 | -0,897686 | <b>-0,996655</b>  | 1209 | 1750 | <b>1479,5</b> |
| C7orf53    | -1,428856 | -0,564117 | <b>-0,9964865</b> | 1435 | 2354 | <b>1894,5</b> |
| SLC25A28   | -0,995953 | NaN       | <b>-0,995953</b>  | 1756 | NaN  | <b>1756</b>   |
| CCDC111    | -0,807037 | -1,184864 | <b>-0,9959505</b> | 1538 | 2258 | <b>1898</b>   |
| DCAF4L1    | -0,995877 | NaN       | <b>-0,995877</b>  | 1950 | NaN  | <b>1950</b>   |
| BEST3      | -1,10191  | -0,889282 | <b>-0,995596</b>  | 2180 | 2833 | <b>2506,5</b> |
| ATG2A      | -0,798574 | -1,192081 | <b>-0,9953275</b> | 1419 | 1942 | <b>1680,5</b> |
| AATF       | -0,039114 | -1,95138  | <b>-0,995247</b>  | 1532 | 1873 | <b>1702,5</b> |
| PDK3       | -1,050113 | -0,939753 | <b>-0,994933</b>  | 1669 | 2213 | <b>1941</b>   |
| GART       | -1,864614 | -0,125201 | <b>-0,9949075</b> | 1927 | 2100 | <b>2013,5</b> |
| TIMM17A    | -0,908509 | -1,080507 | <b>-0,994508</b>  | 1711 | 1765 | <b>1738</b>   |
| SP4        | -1,125382 | -0,86295  | <b>-0,994166</b>  | 1784 | 2569 | <b>2176,5</b> |
| NPL        | -0,853308 | -1,133392 | <b>-0,99335</b>   | 923  | 2631 | <b>1777</b>   |
| DIDO1      | -0,982179 | -1,004478 | <b>-0,9933285</b> | 2311 | 2959 | <b>2635</b>   |
| DRD2       | -0,993296 | NaN       | <b>-0,993296</b>  | 1268 | NaN  | <b>1268</b>   |
| ZCCHC14    | -0,993225 | NaN       | <b>-0,993225</b>  | 1690 | NaN  | <b>1690</b>   |
| CETP       | -0,922604 | -1,06158  | <b>-0,992092</b>  | 1358 | 1851 | <b>1604,5</b> |
| SRD5A2     | -0,630486 | -1,352229 | <b>-0,9913575</b> | 1256 | 1829 | <b>1542,5</b> |
| UBE3A      | -1,210754 | -0,771643 | <b>-0,9911985</b> | 1062 | 1132 | <b>1097</b>   |
| FAM13B     | -1,034397 | -0,947599 | <b>-0,990998</b>  | 1666 | 2578 | <b>2122</b>   |
| PRLHR      | -1,74778  | -0,23356  | <b>-0,99067</b>   | 2100 | 2463 | <b>2281,5</b> |
| CTS2       | -1,03312  | -0,947587 | <b>-0,9903535</b> | 1756 | 1792 | <b>1774</b>   |
| EFTUD1     | -1,176398 | -0,803456 | <b>-0,989927</b>  | 1525 | 1994 | <b>1759,5</b> |
| TAF15      | -1,019422 | -0,95805  | <b>-0,988736</b>  | 1739 | 2053 | <b>1896</b>   |
| OR10A4     | -1,226301 | -0,750756 | <b>-0,9885285</b> | 1864 | 2452 | <b>2158</b>   |
| BCL6B      | -1,21866  | -0,758252 | <b>-0,988456</b>  | 1955 | 2678 | <b>2316,5</b> |
| GHRH       | -1,814231 | -0,162583 | <b>-0,988407</b>  | 964  | 1386 | <b>1175</b>   |
| MICA       | -0,607962 | -1,368523 | <b>-0,9882425</b> | 971  | 1746 | <b>1358,5</b> |

|          |           |           |                   |      |      |               |
|----------|-----------|-----------|-------------------|------|------|---------------|
| IL33     | -3,44138  | 1,465884  | <b>-0,987748</b>  | 1530 | 2301 | <b>1915,5</b> |
| COX7C    | -1,329482 | -0,64536  | <b>-0,987421</b>  | 1000 | 1278 | <b>1139</b>   |
| SRPX     | -0,987227 | NaN       | <b>-0,987227</b>  | 1593 | NaN  | <b>1593</b>   |
| EIF2C4   | -1,120875 | -0,853553 | <b>-0,987214</b>  | 1655 | 2641 | <b>2148</b>   |
| IL17D    | -0,89056  | -1,08305  | <b>-0,986805</b>  | 1394 | 1647 | <b>1520,5</b> |
| SAR1A    | -0,702604 | -1,270635 | <b>-0,9866195</b> | 1758 | 2681 | <b>2219,5</b> |
| CXorf59  | -0,997847 | -0,975174 | <b>-0,9865105</b> | 1381 | 1815 | <b>1598</b>   |
| BTBD16   | -0,488366 | -1,484643 | <b>-0,9865045</b> | 1951 | 2542 | <b>2246,5</b> |
| FTSJD2   | -0,986365 | NaN       | <b>-0,986365</b>  | 1478 | NaN  | <b>1478</b>   |
| C2orf83  | -1,08321  | -0,888902 | <b>-0,986056</b>  | 1322 | 1903 | <b>1612,5</b> |
| LRIG2    | -1,279707 | -0,691369 | <b>-0,985538</b>  | 1495 | 1735 | <b>1615</b>   |
| OR4B1    | -1,302314 | -0,668447 | <b>-0,9853805</b> | 1980 | 2476 | <b>2228</b>   |
| SUV420H2 | -1,324224 | -0,646069 | <b>-0,9851465</b> | 1075 | 1274 | <b>1174,5</b> |
| SLC6A1   | NaN       | -0,985117 | <b>-0,985117</b>  | NaN  | 2457 | <b>2457</b>   |
| SLC26A2  | -1,496653 | -0,473338 | <b>-0,9849955</b> | 1771 | 2173 | <b>1972</b>   |
| HSH2D    | -0,697762 | -1,27185  | <b>-0,984806</b>  | 1212 | 1632 | <b>1422</b>   |
| CADM1    | -0,984544 | NaN       | <b>-0,984544</b>  | 1794 | NaN  | <b>1794</b>   |
| TMEM144  | -0,982406 | NaN       | <b>-0,982406</b>  | 1847 | NaN  | <b>1847</b>   |
| ABCA5    | -0,731776 | -1,232801 | <b>-0,9822885</b> | 1031 | 1777 | <b>1404</b>   |
| ST8SIA2  | -0,646978 | -1,317004 | <b>-0,981991</b>  | 1234 | 2112 | <b>1673</b>   |
| C12orf11 | -1,357562 | -0,605981 | <b>-0,9817715</b> | 1967 | 2497 | <b>2232</b>   |
| AGFG2    | -1,426485 | -0,537041 | <b>-0,981763</b>  | 1496 | 3064 | <b>2280</b>   |
| EXOSC2   | -0,347438 | -1,614586 | <b>-0,981012</b>  | 1419 | 1152 | <b>1285,5</b> |
| TSSC1    | -1,768535 | -0,192703 | <b>-0,980619</b>  | 1701 | 1557 | <b>1629</b>   |
| GATA5    | -1,448713 | -0,511095 | <b>-0,979904</b>  | 1967 | 2945 | <b>2456</b>   |
| COPZ1    | -0,917246 | -1,042153 | <b>-0,9796995</b> | 876  | 1046 | <b>961</b>    |
| TFE3     | -0,355987 | -1,602872 | <b>-0,9794295</b> | 1946 | 1962 | <b>1954</b>   |
| FAR2     | -1,442049 | -0,516629 | <b>-0,979339</b>  | 2133 | 2323 | <b>2228</b>   |
| MPP4     | -1,154509 | -0,804155 | <b>-0,979332</b>  | 1583 | 3275 | <b>2429</b>   |
| PRKY     | -1,473711 | -0,484483 | <b>-0,979097</b>  | 1593 | 2357 | <b>1975</b>   |
| SLC2A9   | -1,216127 | -0,742045 | <b>-0,979086</b>  | 1364 | 1430 | <b>1397</b>   |
| IAPP     | -1,908526 | -0,049335 | <b>-0,9789305</b> | 1604 | 1848 | <b>1726</b>   |
| DCST1    | -1,036689 | -0,920742 | <b>-0,9787155</b> | 1652 | 2367 | <b>2009,5</b> |
| INHBE    | -0,721747 | -1,23433  | <b>-0,9780385</b> | 1450 | 2044 | <b>1747</b>   |

|           |           |           |                   |      |      |               |
|-----------|-----------|-----------|-------------------|------|------|---------------|
| NCOA7     | -1,27738  | -0,67861  | <b>-0,977995</b>  | 833  | 1320 | <b>1076,5</b> |
| MYOC      | -0,977913 | NaN       | <b>-0,977913</b>  | 1647 | NaN  | <b>1647</b>   |
| LCE1C     | -0,719973 | -1,235841 | <b>-0,977907</b>  | 1697 | 1529 | <b>1613</b>   |
| GINS3     | -0,779332 | -1,174725 | <b>-0,9770285</b> | 1579 | 2223 | <b>1901</b>   |
| DCAF8     | -0,811987 | -1,141545 | <b>-0,976766</b>  | 1573 | 1852 | <b>1712,5</b> |
| TTC8      | -0,265868 | -1,68674  | <b>-0,976304</b>  | 1719 | 2042 | <b>1880,5</b> |
| ROMO1     | -0,975307 | NaN       | <b>-0,975307</b>  | 1379 | NaN  | <b>1379</b>   |
| C7orf41   | -0,975236 | NaN       | <b>-0,975236</b>  | 1974 | NaN  | <b>1974</b>   |
| NAV1      | -0,95592  | -0,994337 | <b>-0,9751285</b> | 1639 | 1820 | <b>1729,5</b> |
| FCAMR     | -0,636206 | -1,313171 | <b>-0,9746885</b> | 1717 | 2140 | <b>1928,5</b> |
| ANAPC16   | -0,974666 | NaN       | <b>-0,974666</b>  | 1671 | NaN  | <b>1671</b>   |
| PMEPA1    | -0,441677 | -1,50738  | <b>-0,9745285</b> | 1377 | 2178 | <b>1777,5</b> |
| TNFRSF13C | -1,121336 | -0,827547 | <b>-0,9744415</b> | 1089 | 1463 | <b>1276</b>   |
| IMPG2     | -0,651653 | -1,296617 | <b>-0,974135</b>  | 1969 | 2396 | <b>2182,5</b> |
| SESN3     | -0,560311 | -1,387094 | <b>-0,9737025</b> | 1831 | 2233 | <b>2032</b>   |
| ANKRD24   | -0,973219 | NaN       | <b>-0,973219</b>  | 1513 | NaN  | <b>1513</b>   |
| PDCD6     | -1,180752 | -0,764937 | <b>-0,9728445</b> | 1605 | 1808 | <b>1706,5</b> |
| NOP58     | -0,832287 | -1,113366 | <b>-0,9728265</b> | 1318 | 1804 | <b>1561</b>   |
| MFSD5     | -0,972259 | NaN       | <b>-0,972259</b>  | 1636 | NaN  | <b>1636</b>   |
| KAT6A     | -0,404839 | -1,538798 | <b>-0,9718185</b> | 1909 | 2187 | <b>2048</b>   |
| PITHD1    | -0,971675 | NaN       | <b>-0,971675</b>  | 1483 | NaN  | <b>1483</b>   |
| TTC16     | -0,971476 | NaN       | <b>-0,971476</b>  | 1719 | NaN  | <b>1719</b>   |
| CECR6     | -1,343005 | -0,599445 | <b>-0,971225</b>  | 2119 | 2350 | <b>2234,5</b> |
| BTBD6     | -1,319932 | -0,62245  | <b>-0,971191</b>  | 1968 | 1956 | <b>1962</b>   |
| RNF148    | -0,573163 | -1,368637 | <b>-0,9709</b>    | 1307 | 2020 | <b>1663,5</b> |
| TRHR      | -0,970569 | NaN       | <b>-0,970569</b>  | 1985 | NaN  | <b>1985</b>   |
| GPX4      | -0,538541 | -1,402543 | <b>-0,970542</b>  | 1500 | 1878 | <b>1689</b>   |
| TMEM167A  | -1,374085 | -0,566802 | <b>-0,9704435</b> | 1901 | 2570 | <b>2235,5</b> |
| CRTAM     | -1,182305 | -0,7585   | <b>-0,9704025</b> | 1597 | 2449 | <b>2023</b>   |
| EMID2     | -0,600953 | -1,339368 | <b>-0,9701605</b> | 1322 | 1319 | <b>1320,5</b> |
| DLEU7     | 0,13211   | -2,071475 | <b>-0,9696825</b> | 1236 | 1794 | <b>1515</b>   |
| PKN2      | -0,839264 | -1,099294 | <b>-0,969279</b>  | 1639 | 1927 | <b>1783</b>   |
| NUCB2     | -0,969197 | NaN       | <b>-0,969197</b>  | 1596 | NaN  | <b>1596</b>   |
| EXOSC9    | -1,031275 | -0,906569 | <b>-0,968922</b>  | 1491 | 2145 | <b>1818</b>   |

|           |           |           |                   |      |      |               |
|-----------|-----------|-----------|-------------------|------|------|---------------|
| FGFR10P2  | -1,435016 | -0,502669 | <b>-0,9688425</b> | 1509 | 1842 | <b>1675,5</b> |
| CEBPB     | -0,682509 | -1,255068 | <b>-0,9687885</b> | 907  | 1181 | <b>1044</b>   |
| CELA2B    | -1,040474 | -0,896598 | <b>-0,968536</b>  | 1851 | 2378 | <b>2114,5</b> |
| STK11     | -2,297896 | 0,361097  | <b>-0,9683995</b> | 2098 | 2583 | <b>2340,5</b> |
| TDRD1     | -0,968223 | NaN       | <b>-0,968223</b>  | 1629 | NaN  | <b>1629</b>   |
| IRX4      | -0,477583 | -1,458805 | <b>-0,968194</b>  | 1588 | 2067 | <b>1827,5</b> |
| ATRNL1    | -1,036293 | -0,899217 | <b>-0,967755</b>  | 685  | 1823 | <b>1254</b>   |
| PQBP1     | -1,087218 | -0,846526 | <b>-0,966872</b>  | 1965 | 2259 | <b>2112</b>   |
| CYTH3     | -0,941501 | -0,990735 | <b>-0,966118</b>  | 1548 | 1793 | <b>1670,5</b> |
| GMCL1     | -0,861618 | -1,070433 | <b>-0,9660255</b> | 1537 | 1836 | <b>1686,5</b> |
| STS       | -1,170682 | -0,761125 | <b>-0,9659035</b> | 1150 | 1499 | <b>1324,5</b> |
| ATPAF2    | -0,523667 | -1,407764 | <b>-0,9657155</b> | 1456 | 2127 | <b>1791,5</b> |
| NRAS      | -1,228502 | -0,701536 | <b>-0,965019</b>  | 1694 | 2201 | <b>1947,5</b> |
| PPTC7     | -0,539712 | -1,389511 | <b>-0,9646115</b> | 1492 | 1971 | <b>1731,5</b> |
| KCNAB1    | -1,397854 | -0,530325 | <b>-0,9640895</b> | 1497 | 3083 | <b>2290</b>   |
| SFRP5     | -1,033664 | -0,89427  | <b>-0,963967</b>  | 1149 | 1722 | <b>1435,5</b> |
| GLUD1     | -1,38222  | -0,54562  | <b>-0,96392</b>   | 1594 | 2857 | <b>2225,5</b> |
| ARF5      | -1,440055 | -0,486627 | <b>-0,963341</b>  | 1442 | 1641 | <b>1541,5</b> |
| GLRA1     | -1,697836 | -0,228809 | <b>-0,9633225</b> | 2014 | 2673 | <b>2343,5</b> |
| FLJ45079  | -1,331304 | -0,595031 | <b>-0,9631675</b> | 1863 | 1998 | <b>1930,5</b> |
| PBX3      | -1,239412 | -0,686625 | <b>-0,9630185</b> | 1538 | 2316 | <b>1927</b>   |
| CLPX      | -0,141763 | -1,783978 | <b>-0,9628705</b> | 1250 | 2285 | <b>1767,5</b> |
| TRAPPC6B  | -0,991969 | -0,931861 | <b>-0,961915</b>  | 1436 | 1532 | <b>1484</b>   |
| MAOB      | -1,108985 | -0,814023 | <b>-0,961504</b>  | 1410 | 1665 | <b>1537,5</b> |
| TIMM22    | -0,961283 | NaN       | <b>-0,961283</b>  | 1823 | NaN  | <b>1823</b>   |
| TSN       | -1,337765 | -0,584785 | <b>-0,961275</b>  | 1889 | 1966 | <b>1927,5</b> |
| C14orf178 | -1,409197 | -0,512819 | <b>-0,961008</b>  | 1335 | 1811 | <b>1573</b>   |
| MPPED2    | -0,61026  | -1,31136  | <b>-0,96081</b>   | 1461 | 2366 | <b>1913,5</b> |
| GANAB     | -1,725327 | -0,195521 | <b>-0,960424</b>  | 1704 | 2125 | <b>1914,5</b> |
| FAM70B    | -1,15533  | -0,765387 | <b>-0,9603585</b> | 1894 | 2704 | <b>2299</b>   |
| C19orf6   | -0,959466 | NaN       | <b>-0,959466</b>  | 1439 | NaN  | <b>1439</b>   |
| KCNK3     | -1,52921  | -0,389272 | <b>-0,959241</b>  | 2016 | 2319 | <b>2167,5</b> |
| GRAMD1C   | -1,974618 | 0,056628  | <b>-0,958995</b>  | 1371 | 2038 | <b>1704,5</b> |
| RASEF     | -0,958867 | NaN       | <b>-0,958867</b>  | 1218 | NaN  | <b>1218</b>   |

|          |           |           |                   |      |      |               |
|----------|-----------|-----------|-------------------|------|------|---------------|
| MGAT4C   | -1,1371   | -0,780041 | <b>-0,9585705</b> | 1631 | 1933 | <b>1782</b>   |
| PTPRS    | -1,305846 | -0,610904 | <b>-0,958375</b>  | 1717 | 2223 | <b>1970</b>   |
| HDX      | -0,767804 | -1,148358 | <b>-0,958081</b>  | 1981 | 2527 | <b>2254</b>   |
| C3orf33  | -0,958053 | NaN       | <b>-0,958053</b>  | 1957 | NaN  | <b>1957</b>   |
| ZNF208   | -0,957877 | NaN       | <b>-0,957877</b>  | 1260 | NaN  | <b>1260</b>   |
| KIAA1949 | -1,211611 | -0,703091 | <b>-0,957351</b>  | 1581 | 2190 | <b>1885,5</b> |
| PAXIP1   | -0,957122 | NaN       | <b>-0,957122</b>  | 1889 | NaN  | <b>1889</b>   |
| PDE7B    | -0,816873 | -1,097345 | <b>-0,957109</b>  | 1696 | 2038 | <b>1867</b>   |
| PTDSS1   | -0,136367 | -1,777256 | <b>-0,9568115</b> | 1806 | 1739 | <b>1772,5</b> |
| HIBADH   | -1,028298 | -0,885051 | <b>-0,9566745</b> | 1506 | 2000 | <b>1753</b>   |
| FAM120A  | -1,35194  | -0,560726 | <b>-0,956333</b>  | 1465 | 2055 | <b>1760</b>   |
| APEX1    | -1,480168 | -0,432164 | <b>-0,956166</b>  | 1893 | 2291 | <b>2092</b>   |
| MTOR     | -0,384217 | -1,527365 | <b>-0,955791</b>  | 1384 | 1769 | <b>1576,5</b> |
| PRSS37   | -0,799431 | -1,111905 | <b>-0,955668</b>  | 1426 | 1967 | <b>1696,5</b> |
| MAP4K4   | -0,31768  | -1,593636 | <b>-0,955658</b>  | 1734 | 2245 | <b>1989,5</b> |
| MUSK     | -1,419089 | -0,492115 | <b>-0,955602</b>  | 1669 | 1923 | <b>1796</b>   |
| IRAK1BP1 | -1,159831 | -0,751187 | <b>-0,955509</b>  | 1309 | 1313 | <b>1311</b>   |
| PAX1     | -0,428626 | -1,481419 | <b>-0,9550225</b> | 1267 | 1907 | <b>1587</b>   |
| IGFBP4   | -0,633228 | -1,276381 | <b>-0,9548045</b> | 1399 | 2031 | <b>1715</b>   |
| ERN2     | 0,028252  | -1,937677 | <b>-0,9547125</b> | 1637 | 1509 | <b>1573</b>   |
| KLHL1    | -0,741544 | -1,16767  | <b>-0,954607</b>  | 1393 | 1525 | <b>1459</b>   |
| OR1J1    | -1,24171  | -0,666245 | <b>-0,9539775</b> | 1827 | 1919 | <b>1873</b>   |
| TXNDC2   | -1,539304 | -0,367589 | <b>-0,9534465</b> | 1681 | 1870 | <b>1775,5</b> |
| C4orf46  | -0,95343  | NaN       | <b>-0,95343</b>   | 1583 | NaN  | <b>1583</b>   |
| C1orf63  | -0,953389 | NaN       | <b>-0,953389</b>  | 1053 | NaN  | <b>1053</b>   |
| PCYOX1L  | -1,894105 | -0,012401 | <b>-0,953253</b>  | 1318 | 1542 | <b>1430</b>   |
| MYBPH    | -0,953211 | NaN       | <b>-0,953211</b>  | 1483 | NaN  | <b>1483</b>   |
| COPG     | -0,723087 | -1,182808 | <b>-0,9529475</b> | 759  | 464  | <b>611,5</b>  |
| LPPR4    | -0,899124 | -1,006293 | <b>-0,9527085</b> | 1811 | 2480 | <b>2145,5</b> |
| C11orf67 | -0,877281 | -1,027972 | <b>-0,9526265</b> | 1682 | 1742 | <b>1712</b>   |
| UMODL1   | -1,003621 | -0,901125 | <b>-0,952373</b>  | 1388 | 1417 | <b>1402,5</b> |
| MOGS     | -1,293442 | -0,611141 | <b>-0,9522915</b> | 1779 | 2117 | <b>1948</b>   |
| INPP5K   | -1,772658 | -0,13116  | <b>-0,951909</b>  | 1863 | 2318 | <b>2090,5</b> |
| COL14A1  | -0,436685 | -1,467066 | <b>-0,9518755</b> | 1321 | 1862 | <b>1591,5</b> |

|                    |           |           |                   |      |      |               |
|--------------------|-----------|-----------|-------------------|------|------|---------------|
| APT <sub>X</sub>   | -1,292903 | -0,610301 | <b>-0,951602</b>  | 1863 | 2896 | <b>2379,5</b> |
| ZNF420             | -1,028516 | -0,874049 | <b>-0,9512825</b> | 1554 | 2547 | <b>2050,5</b> |
| ATP2A2             | -0,802605 | -1,099652 | <b>-0,9511285</b> | 1620 | 1783 | <b>1701,5</b> |
| ZNF408             | -0,912183 | -0,989483 | <b>-0,950833</b>  | 1314 | 2145 | <b>1729,5</b> |
| NUP50              | -0,808709 | -1,092666 | <b>-0,9506875</b> | 1715 | 1771 | <b>1743</b>   |
| IPO4               | -0,950423 | NaN       | <b>-0,950423</b>  | 1658 | NaN  | <b>1658</b>   |
| PLEKHG4            | -1,119486 | -0,781116 | <b>-0,950323</b>  | 1425 | 1855 | <b>1640</b>   |
| DNAJB11            | -1,451356 | -0,449037 | <b>-0,9501965</b> | 1726 | 1905 | <b>1815,5</b> |
| SUSD4              | -0,967141 | -0,932706 | <b>-0,9499235</b> | 1388 | 1566 | <b>1477</b>   |
| TMEM88             | -0,949907 | NaN       | <b>-0,949907</b>  | 1079 | NaN  | <b>1079</b>   |
| NRXN3              | -1,138043 | -0,761771 | <b>-0,949907</b>  | 1719 | 2215 | <b>1967</b>   |
| NR5A1              | -0,685707 | -1,213431 | <b>-0,949569</b>  | 1572 | 1676 | <b>1624</b>   |
| NPY                | -0,662994 | -1,235828 | <b>-0,949411</b>  | 1921 | 2330 | <b>2125,5</b> |
| FAM82B             | -2,050515 | 0,153294  | <b>-0,9486105</b> | 1772 | 2307 | <b>2039,5</b> |
| MIPEP              | -1,795923 | -0,100059 | <b>-0,947991</b>  | 1751 | 2121 | <b>1936</b>   |
| CPEB2              | -0,9479   | NaN       | <b>-0,9479</b>    | 1905 | NaN  | <b>1905</b>   |
| UBXN2A             | -1,167174 | -0,728598 | <b>-0,947886</b>  | 1230 | 1444 | <b>1337</b>   |
| REPS2              | -0,947592 | NaN       | <b>-0,947592</b>  | 1192 | NaN  | <b>1192</b>   |
| CXCL17             | -0,947077 | NaN       | <b>-0,947077</b>  | 1809 | NaN  | <b>1809</b>   |
| PSMF1              | -0,568206 | -1,325904 | <b>-0,947055</b>  | 1496 | 2641 | <b>2068,5</b> |
| RPS6KA3            | -1,280827 | -0,612103 | <b>-0,946465</b>  | 1515 | 1747 | <b>1631</b>   |
| TBX2               | -0,857049 | -1,035859 | <b>-0,946454</b>  | 1397 | 2209 | <b>1803</b>   |
| CERKL              | -0,462523 | -1,42928  | <b>-0,9459015</b> | 1652 | 2892 | <b>2272</b>   |
| KLHDC5             | -0,945847 | NaN       | <b>-0,945847</b>  | 1841 | NaN  | <b>1841</b>   |
| ANKRD55            | -0,944562 | -0,947114 | <b>-0,945838</b>  | 1801 | 2301 | <b>2051</b>   |
| ZMYND17            | -0,975301 | -0,91614  | <b>-0,9457205</b> | 1684 | 2358 | <b>2021</b>   |
| ADO                | -0,820445 | -1,068846 | <b>-0,9446455</b> | 1922 | 1920 | <b>1921</b>   |
| STXB <sub>P5</sub> | -1,070316 | -0,818753 | <b>-0,9445345</b> | 1439 | 1984 | <b>1711,5</b> |
| ZNF580             | -1,08839  | -0,800501 | <b>-0,9444455</b> | 778  | 1703 | <b>1240,5</b> |
| FAM194A            | -0,944122 | NaN       | <b>-0,944122</b>  | 1470 | NaN  | <b>1470</b>   |
| GNMT               | -1,417975 | -0,469662 | <b>-0,9438185</b> | 1356 | 2449 | <b>1902,5</b> |
| C2orf54            | -0,926781 | -0,960711 | <b>-0,943746</b>  | 1120 | 1773 | <b>1446,5</b> |
| KIAA0895           | -1,144376 | -0,742112 | <b>-0,943244</b>  | 1914 | 3087 | <b>2500,5</b> |
| RGS19              | -0,589402 | -1,29637  | <b>-0,942886</b>  | 1524 | 2020 | <b>1772</b>   |



|         |           |           |                   |      |      |               |
|---------|-----------|-----------|-------------------|------|------|---------------|
| UNC79   | -0,8004   | -1,08494  | <b>-0,94267</b>   | 1191 | 2304 | <b>1747,5</b> |
| TRDMT1  | -1,208575 | -0,676624 | <b>-0,9425995</b> | 2025 | 1950 | <b>1987,5</b> |
| SGK1    | -1,142122 | -0,74201  | <b>-0,942066</b>  | 1904 | 2617 | <b>2260,5</b> |
| DAD1    | -1,244671 | -0,63726  | <b>-0,9409655</b> | 1438 | 1760 | <b>1599</b>   |
| GPR157  | -0,940541 | NaN       | <b>-0,940541</b>  | 1490 | NaN  | <b>1490</b>   |
| DUSP16  | -0,704657 | -1,176038 | <b>-0,9403475</b> | 1528 | 2410 | <b>1969</b>   |
| SCARA5  | -0,940179 | NaN       | <b>-0,940179</b>  | 1695 | NaN  | <b>1695</b>   |
| GPR45   | -0,93944  | NaN       | <b>-0,93944</b>   | 1607 | NaN  | <b>1607</b>   |
| HNRNPAB | -0,939438 | NaN       | <b>-0,939438</b>  | 1289 | NaN  | <b>1289</b>   |
| BCS1L   | -1,31044  | -0,567662 | <b>-0,939051</b>  | 964  | 2029 | <b>1496,5</b> |
| ADAM8   | -1,155548 | -0,721468 | <b>-0,938508</b>  | 1379 | 2072 | <b>1725,5</b> |
| INPP5E  | -0,749542 | -1,12713  | <b>-0,938336</b>  | 787  | 1945 | <b>1366</b>   |
| NHLRC4  | -0,938311 | NaN       | <b>-0,938311</b>  | 1755 | NaN  | <b>1755</b>   |
| TMSB10  | -0,25219  | -1,622671 | <b>-0,9374305</b> | 1254 | 2099 | <b>1676,5</b> |
| DCN     | -0,67477  | -1,199786 | <b>-0,937278</b>  | 1320 | 1643 | <b>1481,5</b> |
| TRIM3   | -0,776372 | -1,09803  | <b>-0,937201</b>  | 1806 | 2488 | <b>2147</b>   |
| CENPV   | -0,642309 | -1,23176  | <b>-0,9370345</b> | 1369 | 1777 | <b>1573</b>   |
| UBXN2B  | -0,936809 | NaN       | <b>-0,936809</b>  | 1801 | NaN  | <b>1801</b>   |
| TBC1D13 | -0,936361 | NaN       | <b>-0,936361</b>  | 1256 | NaN  | <b>1256</b>   |
| PGLYRP4 | -0,502433 | -1,369824 | <b>-0,9361285</b> | 1429 | 1675 | <b>1552</b>   |
| DLL4    | -0,888874 | -0,982506 | <b>-0,93569</b>   | 932  | 1362 | <b>1147</b>   |
| DLG2    | -0,025325 | -1,846029 | <b>-0,935677</b>  | 1489 | 2099 | <b>1794</b>   |
| FBXO33  | -0,389857 | -1,480971 | <b>-0,935414</b>  | 1844 | 2824 | <b>2334</b>   |
| MOGAT3  | -1,115092 | -0,754547 | <b>-0,9348195</b> | 1923 | 2130 | <b>2026,5</b> |
| SLIT3   | -1,412053 | -0,457237 | <b>-0,934645</b>  | 1741 | 1469 | <b>1605</b>   |
| POR     | -1,305059 | -0,563436 | <b>-0,9342475</b> | 1661 | 1916 | <b>1788,5</b> |
| SLC9A4  | -0,670437 | -1,197508 | <b>-0,9339725</b> | 1623 | 1992 | <b>1807,5</b> |
| FASTKD3 | -1,632518 | -0,235228 | <b>-0,933873</b>  | 2108 | 2649 | <b>2378,5</b> |
| C2CD3   | -0,933851 | NaN       | <b>-0,933851</b>  | 1714 | NaN  | <b>1714</b>   |
| ADCY5   | -0,320868 | -1,546705 | <b>-0,9337865</b> | 1554 | 1793 | <b>1673,5</b> |
| CD5     | -1,266806 | -0,599989 | <b>-0,9333975</b> | 1780 | 3035 | <b>2407,5</b> |
| CLIC2   | -1,709891 | -0,156332 | <b>-0,9331115</b> | 1811 | 1889 | <b>1850</b>   |
| C9orf7  | -1,126301 | -0,738984 | <b>-0,9326425</b> | 1119 | 2096 | <b>1607,5</b> |
| MMP13   | -1,165573 | -0,698874 | <b>-0,9322235</b> | 2004 | 1809 | <b>1906,5</b> |

|          |           |           |                   |      |      |               |
|----------|-----------|-----------|-------------------|------|------|---------------|
| CPT1C    | NaN       | -0,931609 | <b>-0,931609</b>  | NaN  | 2061 | <b>2061</b>   |
| FATE1    | -1,02759  | -0,835527 | <b>-0,9315585</b> | 1631 | 2304 | <b>1967,5</b> |
| IMPDH2   | -0,961103 | -0,901707 | <b>-0,931405</b>  | 1326 | 2501 | <b>1913,5</b> |
| ZNF595   | -0,969772 | -0,891681 | <b>-0,9307265</b> | 2094 | 2383 | <b>2238,5</b> |
| NCAN     | -0,515283 | -1,345253 | <b>-0,930268</b>  | 1661 | 1701 | <b>1681</b>   |
| DDX5     | NaN       | -0,930242 | <b>-0,930242</b>  | NaN  | 1832 | <b>1832</b>   |
| ASPA     | -1,314929 | -0,545243 | <b>-0,930086</b>  | 1817 | 2525 | <b>2171</b>   |
| DLX4     | -1,717694 | -0,142214 | <b>-0,929954</b>  | 1739 | 1935 | <b>1837</b>   |
| KRTAP3-1 | -0,885397 | -0,97343  | <b>-0,9294135</b> | 564  | 1706 | <b>1135</b>   |
| OR2T1    | 0,017041  | -1,875481 | <b>-0,92922</b>   | 2041 | 2195 | <b>2118</b>   |
| SRP68    | -1,112697 | -0,745064 | <b>-0,9288805</b> | 1631 | 1681 | <b>1656</b>   |
| CPAMD8   | -0,928502 | NaN       | <b>-0,928502</b>  | 1310 | NaN  | <b>1310</b>   |
| WDR73    | -0,777932 | -1,078828 | <b>-0,92838</b>   | 1135 | 1447 | <b>1291</b>   |
| FLRT3    | -0,928101 | -0,928176 | <b>-0,9281385</b> | 2101 | 1920 | <b>2010,5</b> |
| ZER1     | -0,362494 | -1,493463 | <b>-0,9279785</b> | 1014 | 955  | <b>984,5</b>  |
| TMEM161B | -0,026744 | -1,82914  | <b>-0,927942</b>  | 1373 | 2142 | <b>1757,5</b> |
| SDCCAG8  | -0,909647 | -0,945759 | <b>-0,927703</b>  | 1460 | 2392 | <b>1926</b>   |
| SLC39A11 | -1,051149 | -0,802596 | <b>-0,9268725</b> | 1804 | 1795 | <b>1799,5</b> |
| PUS7     | -0,926736 | NaN       | <b>-0,926736</b>  | 1475 | NaN  | <b>1475</b>   |
| PADI4    | -1,088422 | -0,764874 | <b>-0,926648</b>  | 1914 | 2270 | <b>2092</b>   |
| SYT6     | -0,79677  | -1,053786 | <b>-0,925278</b>  | 1687 | 1588 | <b>1637,5</b> |
| B4GALT3  | -0,610072 | -1,24043  | <b>-0,925251</b>  | 1518 | 1699 | <b>1608,5</b> |
| THBD     | -1,231542 | -0,618912 | <b>-0,925227</b>  | 1703 | 2296 | <b>1999,5</b> |
| SCAP     | -0,925123 | NaN       | <b>-0,925123</b>  | 1180 | NaN  | <b>1180</b>   |
| FGF14    | -0,759956 | -1,090193 | <b>-0,9250745</b> | 1495 | 1978 | <b>1736,5</b> |
| SGCD     | -2,013435 | 0,163358  | <b>-0,9250385</b> | 1836 | 1738 | <b>1787</b>   |
| MGAT5B   | -0,526782 | -1,323176 | <b>-0,924979</b>  | 1679 | 2138 | <b>1908,5</b> |
| KRT36    | -1,098151 | -0,751745 | <b>-0,924948</b>  | 1481 | 1629 | <b>1555</b>   |
| CLEC7A   | -1,013102 | -0,836719 | <b>-0,9249105</b> | 1139 | 1696 | <b>1417,5</b> |
| TMEM51   | -1,03279  | -0,816596 | <b>-0,924693</b>  | 534  | 930  | <b>732</b>    |
| TTC18    | -0,523691 | -1,325142 | <b>-0,9244165</b> | 1375 | 1618 | <b>1496,5</b> |
| ACOT7    | -1,431955 | -0,416189 | <b>-0,924072</b>  | 1534 | 2416 | <b>1975</b>   |
| OR8A1    | -0,899363 | -0,948746 | <b>-0,9240545</b> | 1625 | 1751 | <b>1688</b>   |
| TESC     | -1,129834 | -0,717663 | <b>-0,9237485</b> | 1368 | 2004 | <b>1686</b>   |

|          |           |           |                   |      |      |               |
|----------|-----------|-----------|-------------------|------|------|---------------|
| TSFM     | -0,981031 | -0,865538 | <b>-0,9232845</b> | 1373 | 2189 | <b>1781</b>   |
| RALBP1   | -1,773858 | -0,07235  | <b>-0,923104</b>  | 1733 | 1796 | <b>1764,5</b> |
| PPP1CC   | -0,328575 | -1,517534 | <b>-0,9230545</b> | 1245 | 1906 | <b>1575,5</b> |
| STK38L   | -2,314749 | 0,469758  | <b>-0,9224955</b> | 1649 | 2222 | <b>1935,5</b> |
| GLOD4    | -1,216577 | -0,628317 | <b>-0,922447</b>  | 1309 | 1549 | <b>1429</b>   |
| EXPH5    | -0,565152 | -1,279276 | <b>-0,922214</b>  | 1625 | 2025 | <b>1825</b>   |
| USP8     | -0,830646 | -1,013318 | <b>-0,921982</b>  | 2128 | 2548 | <b>2338</b>   |
| OR7G3    | -0,670437 | -1,173246 | <b>-0,9218415</b> | 1367 | 2038 | <b>1702,5</b> |
| NFKBIB   | -1,359652 | -0,483209 | <b>-0,9214305</b> | 1851 | 2338 | <b>2094,5</b> |
| FBXO36   | -1,000611 | -0,84171  | <b>-0,9211605</b> | 1633 | 2526 | <b>2079,5</b> |
| C9orf46  | -0,614799 | -1,22722  | <b>-0,9210095</b> | 1918 | 2458 | <b>2188</b>   |
| CCR3     | -0,920961 | NaN       | <b>-0,920961</b>  | 1532 | NaN  | <b>1532</b>   |
| TATDN3   | -1,221944 | -0,619656 | <b>-0,9208</b>    | 1896 | 2493 | <b>2194,5</b> |
| ALKBH6   | -0,594092 | -1,246274 | <b>-0,920183</b>  | 1559 | 2115 | <b>1837</b>   |
| JPH1     | -1,031643 | -0,808457 | <b>-0,92005</b>   | 1691 | 1822 | <b>1756,5</b> |
| CRH      | -2,173378 | 0,334071  | <b>-0,9196535</b> | 1363 | 1497 | <b>1430</b>   |
| EIF4G2   | -0,899547 | -0,939106 | <b>-0,9193265</b> | 1989 | 2352 | <b>2170,5</b> |
| CCBE1    | -0,766306 | -1,071903 | <b>-0,9191045</b> | 1159 | 1521 | <b>1340</b>   |
| UNC45A   | -1,430102 | -0,408065 | <b>-0,9190835</b> | 1802 | 2489 | <b>2145,5</b> |
| SLC6A2   | -0,976098 | -0,861933 | <b>-0,9190155</b> | 822  | 2303 | <b>1562,5</b> |
| MAPK8IP3 | -0,918673 | NaN       | <b>-0,918673</b>  | 1593 | NaN  | <b>1593</b>   |
| AKAP8L   | -1,471164 | -0,36588  | <b>-0,918522</b>  | 1453 | 1501 | <b>1477</b>   |
| TTC37    | -1,329471 | -0,507344 | <b>-0,9184075</b> | 1410 | 1499 | <b>1454,5</b> |
| CCDC12   | -0,751524 | -1,085235 | <b>-0,9183795</b> | 1728 | 1993 | <b>1860,5</b> |
| VWC2     | -0,331345 | -1,504815 | <b>-0,91808</b>   | 824  | 1316 | <b>1070</b>   |
| CCDC70   | -0,117784 | -1,718029 | <b>-0,9179065</b> | 1777 | 2251 | <b>2014</b>   |
| ZNF747   | -0,521578 | -1,313989 | <b>-0,9177835</b> | 1614 | 1808 | <b>1711</b>   |
| TTF2     | -1,051168 | -0,784095 | <b>-0,9176315</b> | 1480 | 2170 | <b>1825</b>   |
| AGPAT4   | -0,518188 | -1,314635 | <b>-0,9164115</b> | 1570 | 1890 | <b>1730</b>   |
| NPM2     | -0,815072 | -1,017719 | <b>-0,9163955</b> | 1454 | 1935 | <b>1694,5</b> |
| ITGB1BP1 | -0,916292 | NaN       | <b>-0,916292</b>  | 1640 | NaN  | <b>1640</b>   |
| TMEM5    | -0,494179 | -1,337609 | <b>-0,915894</b>  | 1510 | 1996 | <b>1753</b>   |
| MPV17L2  | 0,737843  | -2,568993 | <b>-0,915575</b>  | 1626 | 2045 | <b>1835,5</b> |
| WFS1     | -0,666679 | -1,163289 | <b>-0,914984</b>  | 1741 | 2156 | <b>1948,5</b> |

|           |           |           |                   |      |      |               |
|-----------|-----------|-----------|-------------------|------|------|---------------|
| QSER1     | -0,924561 | -0,905115 | <b>-0,914838</b>  | 1691 | 1979 | <b>1835</b>   |
| AVPI1     | -0,38118  | -1,448282 | <b>-0,914731</b>  | 1607 | 2286 | <b>1946,5</b> |
| MSN       | -0,912163 | -0,917196 | <b>-0,9146795</b> | 2137 | 1733 | <b>1935</b>   |
| SLC7A10   | -0,619834 | -1,208657 | <b>-0,9142455</b> | 1357 | 2350 | <b>1853,5</b> |
| COX6B1    | -1,051979 | -0,776044 | <b>-0,9140115</b> | 1634 | 1770 | <b>1702</b>   |
| GRIP1     | -0,913879 | NaN       | <b>-0,913879</b>  | 1193 | NaN  | <b>1193</b>   |
| GORASP2   | -0,913679 | NaN       | <b>-0,913679</b>  | 1791 | NaN  | <b>1791</b>   |
| SLC46A2   | -0,82108  | -1,005707 | <b>-0,9133935</b> | 1840 | 2705 | <b>2272,5</b> |
| FZD1      | -0,913192 | NaN       | <b>-0,913192</b>  | 1759 | NaN  | <b>1759</b>   |
| PRDM14    | NaN       | -0,913145 | <b>-0,913145</b>  | NaN  | 2678 | <b>2678</b>   |
| WDR41     | -0,670254 | -1,156011 | <b>-0,9131325</b> | 657  | 1154 | <b>905,5</b>  |
| PCDHGA12  | -0,912667 | NaN       | <b>-0,912667</b>  | 1696 | NaN  | <b>1696</b>   |
| TNFRSF11A | -1,368093 | -0,456953 | <b>-0,912523</b>  | 1859 | 2715 | <b>2287</b>   |
| BIRC8     | -0,97329  | -0,851574 | <b>-0,912432</b>  | 1927 | 2538 | <b>2232,5</b> |
| CYCS      | -1,478188 | -0,346432 | <b>-0,91231</b>   | 1656 | 2542 | <b>2099</b>   |
| TRAIIP    | -0,555646 | -1,268822 | <b>-0,912234</b>  | 1253 | 2906 | <b>2079,5</b> |
| UBB       | -1,045425 | -0,778615 | <b>-0,91202</b>   | 1593 | 1936 | <b>1764,5</b> |
| GNAT1     | -0,676397 | -1,147143 | <b>-0,91177</b>   | 1920 | 2323 | <b>2121,5</b> |
| BDH1      | -0,913442 | -0,909793 | <b>-0,9116175</b> | 1144 | 1602 | <b>1373</b>   |
| CCDC125   | -0,911421 | NaN       | <b>-0,911421</b>  | 1614 | NaN  | <b>1614</b>   |
| IL1RAPL2  | -0,259396 | -1,562403 | <b>-0,9108995</b> | 1874 | 2603 | <b>2238,5</b> |
| MYOT      | -1,531464 | -0,289574 | <b>-0,910519</b>  | 1637 | 2185 | <b>1911</b>   |
| MEIS2     | -0,20636  | -1,614677 | <b>-0,9105185</b> | 1526 | 2640 | <b>2083</b>   |
| C2orf18   | -1,374951 | -0,446073 | <b>-0,910512</b>  | 1496 | 1832 | <b>1664</b>   |
| CCND3     | -1,035959 | -0,78457  | <b>-0,9102645</b> | 1481 | 2131 | <b>1806</b>   |
| C6orf25   | -0,812373 | -1,007778 | <b>-0,9100755</b> | 1998 | 1734 | <b>1866</b>   |
| AADAT     | -1,048949 | -0,771133 | <b>-0,910041</b>  | 1599 | 2848 | <b>2223,5</b> |
| HABP2     | -1,4401   | -0,379933 | <b>-0,9100165</b> | 1353 | 2030 | <b>1691,5</b> |
| ZFP3      | -0,897393 | -0,92233  | <b>-0,9098615</b> | 1736 | 2017 | <b>1876,5</b> |
| BEND3     | 0,106418  | -1,925559 | <b>-0,9095705</b> | 1195 | 1873 | <b>1534</b>   |
| TSPYL5    | -1,249815 | -0,569247 | <b>-0,909531</b>  | 1635 | 2502 | <b>2068,5</b> |
| JAK3      | -0,037514 | -1,780101 | <b>-0,9088075</b> | 1781 | 1979 | <b>1880</b>   |
| DNASE1L2  | -0,765178 | -1,051973 | <b>-0,9085755</b> | 2018 | 2750 | <b>2384</b>   |
| BCAM      | -1,239134 | -0,577683 | <b>-0,9084085</b> | 1603 | 1984 | <b>1793,5</b> |

|          |           |           |                   |      |      |               |
|----------|-----------|-----------|-------------------|------|------|---------------|
| JAKMIP2  | -0,907942 | NaN       | <b>-0,907942</b>  | 1781 | NaN  | <b>1781</b>   |
| FBXL21   | -0,971604 | -0,843792 | <b>-0,907698</b>  | 1798 | 3080 | <b>2439</b>   |
| NRL      | -1,081286 | -0,733629 | <b>-0,9074575</b> | 387  | 1346 | <b>866,5</b>  |
| LPXN     | 0,082693  | -1,897189 | <b>-0,907248</b>  | 1006 | 1525 | <b>1265,5</b> |
| NFKB2    | -1,151268 | -0,662028 | <b>-0,906648</b>  | 1170 | 2317 | <b>1743,5</b> |
| VPS11    | -0,841043 | -0,971628 | <b>-0,9063355</b> | 1215 | 2029 | <b>1622</b>   |
| SUCNR1   | -0,906296 | NaN       | <b>-0,906296</b>  | 1408 | NaN  | <b>1408</b>   |
| TAB3     | -0,922242 | -0,889819 | <b>-0,9060305</b> | 1661 | 1880 | <b>1770,5</b> |
| C1orf114 | -0,208445 | -1,603599 | <b>-0,906022</b>  | 1011 | 1841 | <b>1426</b>   |
| FAM43B   | -0,905575 | NaN       | <b>-0,905575</b>  | 2230 | NaN  | <b>2230</b>   |
| GTF3C5   | -1,608494 | -0,202506 | <b>-0,9055</b>    | 2151 | 2024 | <b>2087,5</b> |
| KRT85    | -0,905172 | NaN       | <b>-0,905172</b>  | 1798 | NaN  | <b>1798</b>   |
| WDR53    | -0,904331 | NaN       | <b>-0,904331</b>  | 1904 | NaN  | <b>1904</b>   |
| RIF1     | -0,777378 | -1,027924 | <b>-0,902651</b>  | 1562 | 1829 | <b>1695,5</b> |
| MAPKAPK5 | -0,654733 | -1,150489 | <b>-0,902611</b>  | 914  | 1915 | <b>1414,5</b> |
| PPP2R2B  | -1,249671 | -0,555059 | <b>-0,902365</b>  | 1741 | 2290 | <b>2015,5</b> |
| CHD4     | -1,179038 | -0,62494  | <b>-0,901989</b>  | 1868 | 2947 | <b>2407,5</b> |
| TEX13A   | -0,359798 | -1,441996 | <b>-0,900897</b>  | 1310 | 1796 | <b>1553</b>   |
| FAP      | 0,680653  | -2,481862 | <b>-0,9006045</b> | 2116 | 2567 | <b>2341,5</b> |
| EI24     | -0,90059  | NaN       | <b>-0,90059</b>   | 1548 | NaN  | <b>1548</b>   |
| C1orf109 | -0,617702 | -1,183418 | <b>-0,90056</b>   | 1243 | 1505 | <b>1374</b>   |
| TMEM41A  | -0,900465 | NaN       | <b>-0,900465</b>  | 1932 | NaN  | <b>1932</b>   |
| C9orf95  | -0,900446 | NaN       | <b>-0,900446</b>  | 1686 | NaN  | <b>1686</b>   |
| CCHCR1   | -0,922064 | -0,87848  | <b>-0,900272</b>  | 1419 | 2031 | <b>1725</b>   |
| TMPRSS9  | -0,804125 | -0,99627  | <b>-0,9001975</b> | 772  | 1315 | <b>1043,5</b> |
| MGST1    | -0,856929 | -0,942806 | <b>-0,8998675</b> | 1898 | 1821 | <b>1859,5</b> |
| COQ2     | -1,696086 | -0,103433 | <b>-0,8997595</b> | 1586 | 1923 | <b>1754,5</b> |
| YLPM1    | -0,89947  | NaN       | <b>-0,89947</b>   | 1486 | NaN  | <b>1486</b>   |
| MESDC1   | -1,00359  | -0,793578 | <b>-0,898584</b>  | 1790 | 2159 | <b>1974,5</b> |
| GJC3     | -1,769133 | -0,026568 | <b>-0,8978505</b> | 1727 | 1191 | <b>1459</b>   |
| BMP1     | -1,074752 | -0,720647 | <b>-0,8976995</b> | 1895 | 2245 | <b>2070</b>   |
| MUCL1    | -1,455008 | -0,340121 | <b>-0,8975645</b> | 900  | 1295 | <b>1097,5</b> |
| CDKN2AIP | -0,897452 | NaN       | <b>-0,897452</b>  | 1780 | NaN  | <b>1780</b>   |
| TBC1D7   | -0,726192 | -1,068633 | <b>-0,8974125</b> | 1834 | 2079 | <b>1956,5</b> |

|          |           |           |                   |      |      |               |
|----------|-----------|-----------|-------------------|------|------|---------------|
| ZNF148   | -1,37309  | -0,420842 | <b>-0,896966</b>  | 778  | 1279 | <b>1028,5</b> |
| RAB14    | -0,740599 | -1,052814 | <b>-0,8967065</b> | 1466 | 2094 | <b>1780</b>   |
| HOXA10   | -1,246734 | -0,546092 | <b>-0,896413</b>  | 1985 | 2274 | <b>2129,5</b> |
| ZNF484   | -1,509526 | -0,283048 | <b>-0,896287</b>  | 1845 | 2093 | <b>1969</b>   |
| YPEL1    | -1,050622 | -0,741197 | <b>-0,8959095</b> | 2060 | 2318 | <b>2189</b>   |
| GGH      | -1,775549 | -0,016111 | <b>-0,89583</b>   | 1830 | 1257 | <b>1543,5</b> |
| YIPF4    | -0,842773 | -0,948853 | <b>-0,895813</b>  | 1517 | 1924 | <b>1720,5</b> |
| ZNF404   | -0,914711 | -0,876889 | <b>-0,8958</b>    | 1277 | 1758 | <b>1517,5</b> |
| ARHGAP30 | -0,895793 | NaN       | <b>-0,895793</b>  | 1646 | NaN  | <b>1646</b>   |
| TTC27    | -0,893051 | -0,89795  | <b>-0,8955005</b> | 1460 | 1734 | <b>1597</b>   |
| TRHDE    | -1,650231 | -0,139517 | <b>-0,894874</b>  | 2007 | 2037 | <b>2022</b>   |
| KRT72    | -0,584312 | -1,204933 | <b>-0,8946225</b> | 1654 | 2497 | <b>2075,5</b> |
| PPIL3    | -1,39142  | -0,394289 | <b>-0,8928545</b> | 1687 | 2540 | <b>2113,5</b> |
| AQPEP    | -0,688536 | -1,096883 | <b>-0,8927095</b> | 1163 | 2266 | <b>1714,5</b> |
| RNF43    | -0,769421 | -1,015995 | <b>-0,892708</b>  | 1210 | 1748 | <b>1479</b>   |
| C6orf211 | -0,89207  | NaN       | <b>-0,89207</b>   | 1969 | NaN  | <b>1969</b>   |
| YEATS2   | -0,891816 | NaN       | <b>-0,891816</b>  | 1551 | NaN  | <b>1551</b>   |
| PLAC8    | -0,891784 | NaN       | <b>-0,891784</b>  | 1600 | NaN  | <b>1600</b>   |
| CDK5R1   | 0,2637    | -2,046817 | <b>-0,8915585</b> | 1263 | 1810 | <b>1536,5</b> |
| C19orf45 | -1,125082 | -0,657564 | <b>-0,891323</b>  | 1651 | 2138 | <b>1894,5</b> |
| C3orf30  | -0,772813 | -1,008711 | <b>-0,890762</b>  | 1511 | 2033 | <b>1772</b>   |
| MTA1     | NaN       | -0,890213 | <b>-0,890213</b>  | NaN  | 2361 | <b>2361</b>   |
| MDGA1    | -0,890062 | NaN       | <b>-0,890062</b>  | 1404 | NaN  | <b>1404</b>   |
| CAB39L   | -0,604482 | -1,175517 | <b>-0,8899995</b> | 1313 | 2439 | <b>1876</b>   |
| MFSD6    | -0,889832 | NaN       | <b>-0,889832</b>  | 958  | NaN  | <b>958</b>    |
| TTC39A   | -1,281338 | -0,498313 | <b>-0,8898255</b> | 1416 | 1763 | <b>1589,5</b> |
| LRG1     | -1,577408 | -0,202102 | <b>-0,889755</b>  | 1333 | 2101 | <b>1717</b>   |
| ARNT     | -0,759426 | -1,019531 | <b>-0,8894785</b> | 1965 | 2177 | <b>2071</b>   |
| SRY      | -0,875494 | -0,902923 | <b>-0,8892085</b> | 1712 | 2154 | <b>1933</b>   |
| SYCE1L   | -1,943088 | 0,165143  | <b>-0,8889725</b> | 1653 | 1380 | <b>1516,5</b> |
| WISP3    | -0,702503 | -1,075394 | <b>-0,8889485</b> | 1216 | 1986 | <b>1601</b>   |
| SERPINB9 | -1,37521  | -0,402606 | <b>-0,888908</b>  | 1546 | 2159 | <b>1852,5</b> |
| PNP      | -1,244451 | -0,53331  | <b>-0,8888805</b> | 1799 | 2686 | <b>2242,5</b> |
| MDGA2    | -1,145781 | -0,631702 | <b>-0,8887415</b> | 1765 | 1868 | <b>1816,5</b> |

|           |           |           |                   |      |      |               |
|-----------|-----------|-----------|-------------------|------|------|---------------|
| WDR89     | -0,888703 | NaN       | <b>-0,888703</b>  | 1644 | NaN  | <b>1644</b>   |
| NIPSNAP3A | -0,888698 | NaN       | <b>-0,888698</b>  | 1458 | NaN  | <b>1458</b>   |
| SNX17     | -1,891103 | 0,114262  | <b>-0,8884205</b> | 1331 | 2294 | <b>1812,5</b> |
| C14orf142 | -0,888168 | NaN       | <b>-0,888168</b>  | 2047 | NaN  | <b>2047</b>   |
| CHML      | NaN       | -0,888058 | <b>-0,888058</b>  | NaN  | 3587 | <b>3587</b>   |
| CAMK1D    | -1,347902 | -0,427838 | <b>-0,88787</b>   | 1737 | 2151 | <b>1944</b>   |
| OTOS      | -1,561766 | -0,213558 | <b>-0,887662</b>  | 1473 | 2061 | <b>1767</b>   |
| ALOX15B   | -0,623521 | -1,151661 | <b>-0,887591</b>  | 1250 | 1692 | <b>1471</b>   |
| SPATA19   | -0,887016 | NaN       | <b>-0,887016</b>  | 1962 | NaN  | <b>1962</b>   |
| ODF4      | -0,886992 | NaN       | <b>-0,886992</b>  | 1887 | NaN  | <b>1887</b>   |
| AHCYL1    | -0,461632 | -1,31224  | <b>-0,886936</b>  | 1809 | 2167 | <b>1988</b>   |
| UTP6      | -0,057637 | -1,715808 | <b>-0,8867225</b> | 1190 | 1231 | <b>1210,5</b> |
| ITPKA     | -0,807896 | -0,964762 | <b>-0,886329</b>  | 1970 | 1749 | <b>1859,5</b> |
| ARL4A     | -1,187137 | -0,585188 | <b>-0,8861625</b> | 1644 | 2712 | <b>2178</b>   |
| BRD1      | -1,217885 | -0,554333 | <b>-0,886109</b>  | 1317 | 1631 | <b>1474</b>   |
| EN2       | -0,770139 | -1,001688 | <b>-0,8859135</b> | 1595 | 2263 | <b>1929</b>   |
| RSPH9     | -0,749568 | -1,022183 | <b>-0,8858755</b> | 1290 | 1934 | <b>1612</b>   |
| PLEKHA6   | -0,885219 | NaN       | <b>-0,885219</b>  | 1603 | NaN  | <b>1603</b>   |
| EXTL3     | -0,838134 | -0,932136 | <b>-0,885135</b>  | 2012 | 2213 | <b>2112,5</b> |
| KLF4      | -1,345811 | -0,423376 | <b>-0,8845935</b> | 1607 | 2062 | <b>1834,5</b> |
| 07-mars   | -1,26999  | -0,499099 | <b>-0,8845445</b> | 1684 | 2245 | <b>1964,5</b> |
| SLC5A7    | -0,571218 | -1,197798 | <b>-0,884508</b>  | 1745 | 2701 | <b>2223</b>   |
| PALMD     | -2,152925 | 0,384534  | <b>-0,8841955</b> | 1377 | 1762 | <b>1569,5</b> |
| MGRN1     | -0,636344 | -1,131718 | <b>-0,884031</b>  | 1445 | 3078 | <b>2261,5</b> |
| KIDINS220 | -1,450875 | -0,316743 | <b>-0,883809</b>  | 1710 | 2674 | <b>2192</b>   |
| CDH12     | -0,883777 | NaN       | <b>-0,883777</b>  | 1685 | NaN  | <b>1685</b>   |
| TEKT5     | -0,882749 | NaN       | <b>-0,882749</b>  | 1285 | NaN  | <b>1285</b>   |
| MGP       | -0,882717 | NaN       | <b>-0,882717</b>  | 1536 | NaN  | <b>1536</b>   |
| GFER      | -0,924631 | -0,839255 | <b>-0,881943</b>  | 897  | 1641 | <b>1269</b>   |
| PCM1      | -1,106677 | -0,656265 | <b>-0,881471</b>  | 2021 | 2921 | <b>2471</b>   |
| GABRQ     | -0,812558 | -0,950355 | <b>-0,8814565</b> | 1647 | 2019 | <b>1833</b>   |
| H1FOO     | -1,114996 | -0,647811 | <b>-0,8814035</b> | 1321 | 1660 | <b>1490,5</b> |
| FGFR1     | -0,756913 | -1,005719 | <b>-0,881316</b>  | 1276 | 1376 | <b>1326</b>   |
| CCDC56    | -0,504301 | -1,258268 | <b>-0,8812845</b> | 1159 | 1352 | <b>1255,5</b> |

|         |           |           |                   |      |      |               |
|---------|-----------|-----------|-------------------|------|------|---------------|
| YPEL5   | -0,880681 | NaN       | <b>-0,880681</b>  | 1638 | NaN  | <b>1638</b>   |
| ULBP3   | -0,87986  | NaN       | <b>-0,87986</b>   | 1367 | NaN  | <b>1367</b>   |
| CD200   | -1,559833 | -0,199614 | <b>-0,8797235</b> | 1375 | 1972 | <b>1673,5</b> |
| PRUNE   | -1,022614 | -0,736328 | <b>-0,879471</b>  | 1465 | 1801 | <b>1633</b>   |
| LONP1   | -1,064887 | -0,692831 | <b>-0,878859</b>  | 1590 | 1920 | <b>1755</b>   |
| C8orf85 | -0,878831 | NaN       | <b>-0,878831</b>  | 1916 | NaN  | <b>1916</b>   |
| ARFIP1  | -1,246293 | -0,511016 | <b>-0,8786545</b> | 2040 | 1641 | <b>1840,5</b> |
| RYK     | -1,302674 | -0,454151 | <b>-0,8784125</b> | 1613 | 2176 | <b>1894,5</b> |
| THRA    | -0,456329 | -1,300447 | <b>-0,878388</b>  | 1668 | 1734 | <b>1701</b>   |
| RUND3A  | -1,231303 | -0,525267 | <b>-0,878285</b>  | 1194 | 1405 | <b>1299,5</b> |
| PASD1   | -0,878212 | NaN       | <b>-0,878212</b>  | 531  | NaN  | <b>531</b>    |
| RAD1    | -0,306128 | -1,44975  | <b>-0,877939</b>  | 1981 | 3285 | <b>2633</b>   |
| ZNF397  | -0,326855 | -1,428931 | <b>-0,877893</b>  | 1550 | 1744 | <b>1647</b>   |
| CPA6    | -1,888721 | 0,133478  | <b>-0,8776215</b> | 1692 | 1224 | <b>1458</b>   |
| LCE1B   | -1,755145 | 0,000005  | <b>-0,87757</b>   | 1750 | 2287 | <b>2018,5</b> |
| HK2     | -0,834266 | -0,920714 | <b>-0,87749</b>   | 1230 | 1628 | <b>1429</b>   |
| EPG5    | -0,740087 | -1,014724 | <b>-0,8774055</b> | 1532 | 1758 | <b>1645</b>   |
| FXC1    | -1,376665 | -0,37808  | <b>-0,8773725</b> | 1574 | 1731 | <b>1652,5</b> |
| AXL     | -1,881097 | 0,126402  | <b>-0,8773475</b> | 2327 | 2141 | <b>2234</b>   |
| RBCK1   | -0,063831 | -1,690689 | <b>-0,87726</b>   | 1700 | 2718 | <b>2209</b>   |
| FBLIM1  | -1,184736 | -0,568785 | <b>-0,8767605</b> | 1306 | 1401 | <b>1353,5</b> |
| TRIB3   | -1,408094 | -0,345013 | <b>-0,8765535</b> | 1591 | 2328 | <b>1959,5</b> |
| ZNF598  | -1,145618 | -0,607081 | <b>-0,8763495</b> | 1060 | 1569 | <b>1314,5</b> |
| REXO1   | -0,700332 | -1,052147 | <b>-0,8762395</b> | 1677 | 1935 | <b>1806</b>   |
| LXN     | -1,26274  | -0,489566 | <b>-0,876153</b>  | 1157 | 2131 | <b>1644</b>   |
| COL4A1  | -0,310973 | -1,441246 | <b>-0,8761095</b> | 1673 | 2277 | <b>1975</b>   |
| CD3G    | -1,315822 | -0,435126 | <b>-0,875474</b>  | 1743 | 1604 | <b>1673,5</b> |
| TMCC3   | -0,875418 | NaN       | <b>-0,875418</b>  | 1776 | NaN  | <b>1776</b>   |
| FOXE3   | -0,358029 | -1,391878 | <b>-0,8749535</b> | 1234 | 1783 | <b>1508,5</b> |
| COL5A1  | -0,79318  | -0,956697 | <b>-0,8749385</b> | 1886 | 1981 | <b>1933,5</b> |
| MT1X    | -0,874566 | NaN       | <b>-0,874566</b>  | 1940 | NaN  | <b>1940</b>   |
| S1PR4   | -0,874023 | NaN       | <b>-0,874023</b>  | 1403 | NaN  | <b>1403</b>   |
| PDCD2L  | -0,873561 | NaN       | <b>-0,873561</b>  | 1727 | NaN  | <b>1727</b>   |
| TMTC4   | -0,87338  | NaN       | <b>-0,87338</b>   | 1626 | NaN  | <b>1626</b>   |



|          |           |           |                   |      |      |               |
|----------|-----------|-----------|-------------------|------|------|---------------|
| TCEA3    | -0,704997 | -1,041684 | <b>-0,8733405</b> | 1769 | 1820 | <b>1794,5</b> |
| SETDB2   | -1,124966 | -0,621533 | <b>-0,8732495</b> | 1600 | 1805 | <b>1702,5</b> |
| OR51M1   | -0,430369 | -1,315662 | <b>-0,8730155</b> | 804  | 1519 | <b>1161,5</b> |
| SLC5A10  | -1,340583 | -0,40538  | <b>-0,8729815</b> | 1143 | 1643 | <b>1393</b>   |
| AOC3     | NaN       | -0,872825 | <b>-0,872825</b>  | NaN  | 2606 | <b>2606</b>   |
| SLCO2B1  | -1,191631 | -0,551801 | <b>-0,871716</b>  | 1259 | 1759 | <b>1509</b>   |
| RASGRP4  | -1,152934 | -0,590306 | <b>-0,87162</b>   | 1730 | 2390 | <b>2060</b>   |
| SRF      | -1,813687 | 0,071249  | <b>-0,871219</b>  | 1911 | 2433 | <b>2172</b>   |
| SPAG9    | -0,978787 | -0,762787 | <b>-0,870787</b>  | 1596 | 1801 | <b>1698,5</b> |
| EYA3     | -0,016626 | -1,724455 | <b>-0,8705405</b> | 1062 | 2122 | <b>1592</b>   |
| GCDH     | -0,975269 | -0,763959 | <b>-0,869614</b>  | 1579 | 1695 | <b>1637</b>   |
| MTA2     | -0,665234 | -1,073954 | <b>-0,869594</b>  | 1263 | 1565 | <b>1414</b>   |
| RSPO2    | -1,015412 | -0,722251 | <b>-0,8688315</b> | 1335 | 1726 | <b>1530,5</b> |
| PHF14    | -0,578957 | -1,158671 | <b>-0,868814</b>  | 1540 | 2441 | <b>1990,5</b> |
| ZNF350   | -0,749622 | -0,987047 | <b>-0,8683345</b> | 972  | 1800 | <b>1386</b>   |
| AICDA    | -0,761948 | -0,973945 | <b>-0,8679465</b> | 2238 | 2307 | <b>2272,5</b> |
| RANBP6   | -1,351835 | -0,383753 | <b>-0,867794</b>  | 1745 | 2839 | <b>2292</b>   |
| LTA4H    | -0,492745 | -1,24262  | <b>-0,8676825</b> | 1306 | 2463 | <b>1884,5</b> |
| PTTG2    | -0,867449 | NaN       | <b>-0,867449</b>  | 1793 | NaN  | <b>1793</b>   |
| LDLRAP1  | -0,756277 | -0,978052 | <b>-0,8671645</b> | 1324 | 2069 | <b>1696,5</b> |
| ANKRD32  | -0,867076 | NaN       | <b>-0,867076</b>  | 1587 | NaN  | <b>1587</b>   |
| ZNF407   | -0,866674 | NaN       | <b>-0,866674</b>  | 818  | NaN  | <b>818</b>    |
| PSIP1    | -0,364024 | -1,369066 | <b>-0,866545</b>  | 1855 | 2505 | <b>2180</b>   |
| OR1J2    | -1,136686 | -0,596154 | <b>-0,86642</b>   | 2330 | 2458 | <b>2394</b>   |
| HAND1    | -1,041231 | -0,691566 | <b>-0,8663985</b> | 1271 | 1806 | <b>1538,5</b> |
| HDAC9    | -1,056971 | -0,674536 | <b>-0,8657535</b> | 1768 | 2208 | <b>1988</b>   |
| C7orf65  | -0,555318 | -1,176047 | <b>-0,8656825</b> | 787  | 1504 | <b>1145,5</b> |
| RPAP3    | -0,865519 | NaN       | <b>-0,865519</b>  | 1992 | NaN  | <b>1992</b>   |
| EPB41L4A | -0,943186 | -0,787221 | <b>-0,8652035</b> | 1927 | 1967 | <b>1947</b>   |
| TTL9     | -0,877472 | -0,852881 | <b>-0,8651765</b> | 1480 | 1727 | <b>1603,5</b> |
| RASGRP1  | -0,549392 | -1,178782 | <b>-0,864087</b>  | 1190 | 1689 | <b>1439,5</b> |
| PTMS     | -1,913343 | 0,185382  | <b>-0,8639805</b> | 1585 | 2270 | <b>1927,5</b> |
| MRPS33   | -1,089008 | -0,638445 | <b>-0,8637265</b> | 1697 | 1838 | <b>1767,5</b> |
| EDA      | -0,863101 | NaN       | <b>-0,863101</b>  | 1556 | NaN  | <b>1556</b>   |

|          |           |           |                   |      |      |               |
|----------|-----------|-----------|-------------------|------|------|---------------|
| PGLS     | -1,147734 | -0,577716 | <b>-0,862725</b>  | 1648 | 1820 | <b>1734</b>   |
| SEMA4C   | 0,344447  | -2,069872 | <b>-0,8627125</b> | 1612 | 1699 | <b>1655,5</b> |
| PSMC4    | -1,468548 | -0,256792 | <b>-0,86267</b>   | 1277 | 1909 | <b>1593</b>   |
| CHKA     | -0,567203 | -1,157787 | <b>-0,862495</b>  | 1535 | 2014 | <b>1774,5</b> |
| LYG1     | -0,918049 | -0,806484 | <b>-0,8622665</b> | 1654 | 2473 | <b>2063,5</b> |
| FSCN3    | -0,861963 | NaN       | <b>-0,861963</b>  | 1613 | NaN  | <b>1613</b>   |
| ACN9     | -0,74584  | -0,978048 | <b>-0,861944</b>  | 1661 | 2675 | <b>2168</b>   |
| BACE1    | -1,543645 | -0,179941 | <b>-0,861793</b>  | 1859 | 2356 | <b>2107,5</b> |
| KLHL20   | -1,091084 | -0,631647 | <b>-0,8613655</b> | 1748 | 2498 | <b>2123</b>   |
| COL6A5   | -1,335872 | -0,386827 | <b>-0,8613495</b> | 1594 | 2216 | <b>1905</b>   |
| CEP164   | -0,861272 | NaN       | <b>-0,861272</b>  | 1620 | NaN  | <b>1620</b>   |
| PCBP3    | -0,818909 | -0,903581 | <b>-0,861245</b>  | 1538 | 1992 | <b>1765</b>   |
| KLHL17   | -1,517814 | -0,204673 | <b>-0,8612435</b> | 1380 | 2266 | <b>1823</b>   |
| TPD52L3  | -0,907427 | -0,814909 | <b>-0,861168</b>  | 1622 | 1833 | <b>1727,5</b> |
| BAMBI    | -0,559179 | -1,16307  | <b>-0,8611245</b> | 1487 | 1670 | <b>1578,5</b> |
| CCDC102B | -1,890594 | 0,169013  | <b>-0,8607905</b> | 1389 | 1777 | <b>1583</b>   |
| ZNF513   | -0,11903  | -1,602115 | <b>-0,8605725</b> | 1566 | 1621 | <b>1593,5</b> |
| TSPAN3   | 0,038317  | -1,758664 | <b>-0,8601735</b> | 1586 | 2298 | <b>1942</b>   |
| CRBN     | -0,715177 | -1,005167 | <b>-0,860172</b>  | 1361 | 1784 | <b>1572,5</b> |
| ST3GAL1  | -0,278796 | -1,441427 | <b>-0,8601115</b> | 1588 | 1819 | <b>1703,5</b> |
| ZKSCAN1  | -0,859706 | NaN       | <b>-0,859706</b>  | 1623 | NaN  | <b>1623</b>   |
| NR2C1    | -2,014696 | 0,295913  | <b>-0,8593915</b> | 1559 | 1794 | <b>1676,5</b> |
| ERGIC3   | -0,541968 | -1,176044 | <b>-0,859006</b>  | 1905 | 2770 | <b>2337,5</b> |
| MPP6     | NaN       | -0,858716 | <b>-0,858716</b>  | NaN  | 2686 | <b>2686</b>   |
| C9orf40  | -1,350538 | -0,366704 | <b>-0,858621</b>  | 1922 | 2013 | <b>1967,5</b> |
| SLC25A29 | -0,912946 | -0,804175 | <b>-0,8585605</b> | 1443 | 1733 | <b>1588</b>   |
| TMEM217  | -1,002168 | -0,714831 | <b>-0,8584995</b> | 1636 | 1536 | <b>1586</b>   |
| FUT8     | -1,202424 | -0,514133 | <b>-0,8582785</b> | 1643 | 2093 | <b>1868</b>   |
| TMTC2    | -0,183491 | -1,532917 | <b>-0,858204</b>  | 1611 | 2399 | <b>2005</b>   |
| CRYAA    | -0,857976 | NaN       | <b>-0,857976</b>  | 1470 | NaN  | <b>1470</b>   |
| TAS2R50  | -0,857651 | NaN       | <b>-0,857651</b>  | 1225 | NaN  | <b>1225</b>   |
| PTAFR    | -0,857568 | NaN       | <b>-0,857568</b>  | 1976 | NaN  | <b>1976</b>   |
| FYN      | -1,126153 | -0,588568 | <b>-0,8573605</b> | 1526 | 1773 | <b>1649,5</b> |
| SMC1B    | -0,803283 | -0,909836 | <b>-0,8565595</b> | 1773 | 2779 | <b>2276</b>   |

|         |           |           |                   |      |      |               |
|---------|-----------|-----------|-------------------|------|------|---------------|
| TXNIP   | -0,532323 | -1,1805   | <b>-0,8564115</b> | 1419 | 2417 | <b>1918</b>   |
| STX1B   | -0,560358 | -1,152441 | <b>-0,8563995</b> | 1296 | 1957 | <b>1626,5</b> |
| MAU2    | -0,399358 | -1,313159 | <b>-0,8562585</b> | 2178 | 2282 | <b>2230</b>   |
| ALX3    | -1,144807 | -0,567647 | <b>-0,856227</b>  | 1025 | 1899 | <b>1462</b>   |
| CD48    | -1,356075 | -0,356188 | <b>-0,8561315</b> | 1983 | 1804 | <b>1893,5</b> |
| FUNDC2  | -0,897898 | -0,814135 | <b>-0,8560165</b> | 2038 | 2150 | <b>2094</b>   |
| FGF5    | -1,168931 | -0,542933 | <b>-0,855932</b>  | 1169 | 1278 | <b>1223,5</b> |
| KIRREL2 | -0,695971 | -1,014592 | <b>-0,8552815</b> | 1459 | 1823 | <b>1641</b>   |
| PRPF4   | -0,728593 | -0,980908 | <b>-0,8547505</b> | 1198 | 1894 | <b>1546</b>   |
| PTH2R   | -1,011102 | -0,698377 | <b>-0,8546985</b> | 1800 | 2126 | <b>1963</b>   |
| TMED4   | -1,128038 | -0,57933  | <b>-0,853684</b>  | 1546 | 1772 | <b>1659</b>   |
| WDR54   | -0,853595 | NaN       | <b>-0,853595</b>  | 1457 | NaN  | <b>1457</b>   |
| LY96    | -0,727992 | -0,979155 | <b>-0,8535735</b> | 1661 | 2182 | <b>1921,5</b> |
| DCAF4   | -0,853159 | NaN       | <b>-0,853159</b>  | 1733 | NaN  | <b>1733</b>   |
| KIF3C   | -0,704867 | -1,001373 | <b>-0,85312</b>   | 418  | 1338 | <b>878</b>    |
| ECE1    | -0,792871 | -0,912959 | <b>-0,852915</b>  | 1815 | 1795 | <b>1805</b>   |
| ICOSLG  | -0,864661 | -0,841142 | <b>-0,8529015</b> | 1492 | 2229 | <b>1860,5</b> |
| RHBDL1  | -0,477144 | -1,228562 | <b>-0,852853</b>  | 1421 | 2340 | <b>1880,5</b> |
| LGI3    | -0,246012 | -1,459566 | <b>-0,852789</b>  | 1243 | 1128 | <b>1185,5</b> |
| MPZL3   | -0,57727  | -1,12737  | <b>-0,85232</b>   | 1863 | 2222 | <b>2042,5</b> |
| TNNC1   | -0,849837 | -0,853698 | <b>-0,8517675</b> | 978  | 1541 | <b>1259,5</b> |
| NEUROD4 | -1,078552 | -0,624741 | <b>-0,8516465</b> | 1428 | 1916 | <b>1672</b>   |
| MAGI3   | -0,989229 | -0,712841 | <b>-0,851035</b>  | 1766 | 2402 | <b>2084</b>   |
| DMWD    | -0,116014 | -1,585795 | <b>-0,8509045</b> | 1813 | 3157 | <b>2485</b>   |
| CHMP1B  | -0,354015 | -1,347677 | <b>-0,850846</b>  | 1505 | 1765 | <b>1635</b>   |
| RNF144B | -1,255475 | -0,44579  | <b>-0,8506325</b> | 1542 | 2606 | <b>2074</b>   |
| LSM2    | -1,367022 | -0,333807 | <b>-0,8504145</b> | 580  | 967  | <b>773,5</b>  |
| PSMB3   | -1,388435 | -0,312283 | <b>-0,850359</b>  | 1081 | 1382 | <b>1231,5</b> |
| DLL3    | -0,477005 | -1,223607 | <b>-0,850306</b>  | 1772 | 1810 | <b>1791</b>   |
| CNGB1   | -0,885506 | -0,814535 | <b>-0,8500205</b> | 1715 | 2043 | <b>1879</b>   |
| GALT    | -0,31485  | -1,385146 | <b>-0,849998</b>  | 1448 | 2215 | <b>1831,5</b> |
| SOX6    | -0,709656 | -0,990075 | <b>-0,8498655</b> | 1832 | 2251 | <b>2041,5</b> |
| GP2     | -0,650419 | -1,04905  | <b>-0,8497345</b> | 1505 | 2180 | <b>1842,5</b> |
| COX8A   | -1,051969 | -0,647429 | <b>-0,849699</b>  | 1824 | 3137 | <b>2480,5</b> |

|          |           |           |                   |      |      |               |
|----------|-----------|-----------|-------------------|------|------|---------------|
| OR4K2    | -1,52448  | -0,174385 | <b>-0,8494325</b> | 1331 | 1471 | <b>1401</b>   |
| S100A3   | -0,676406 | -1,022423 | <b>-0,8494145</b> | 1610 | 2322 | <b>1966</b>   |
| ZNF613   | -1,610703 | -0,088101 | <b>-0,849402</b>  | 1980 | 1532 | <b>1756</b>   |
| C16orf90 | -0,361166 | -1,335782 | <b>-0,848474</b>  | 1216 | 1493 | <b>1354,5</b> |
| MORC2    | -0,848161 | NaN       | <b>-0,848161</b>  | 1653 | NaN  | <b>1653</b>   |
| CHD5     | -1,297183 | -0,399025 | <b>-0,848104</b>  | 1373 | 2403 | <b>1888</b>   |
| C7orf34  | -0,675563 | -1,020438 | <b>-0,8480005</b> | 1460 | 2438 | <b>1949</b>   |
| PCDH9    | -0,6008   | -1,095115 | <b>-0,8479575</b> | 1556 | 1690 | <b>1623</b>   |
| PRKAB2   | -0,787162 | -0,908741 | <b>-0,8479515</b> | 1967 | 2325 | <b>2146</b>   |
| TRAF3IP3 | -0,999739 | -0,696152 | <b>-0,8479455</b> | 1745 | 1881 | <b>1813</b>   |
| IFITM5   | -0,643197 | -1,051811 | <b>-0,847504</b>  | 1695 | 2410 | <b>2052,5</b> |
| ERI3     | -0,847476 | NaN       | <b>-0,847476</b>  | 1860 | NaN  | <b>1860</b>   |
| KCNE2    | -0,569338 | -1,125264 | <b>-0,847301</b>  | 1544 | 2018 | <b>1781</b>   |
| MIR22HG  | -0,69071  | -1,00332  | <b>-0,847015</b>  | 1194 | 1357 | <b>1275,5</b> |
| FBXO16   | -1,096338 | -0,596599 | <b>-0,8464685</b> | 2085 | 2805 | <b>2445</b>   |
| CHRM1    | -0,846396 | NaN       | <b>-0,846396</b>  | 1850 | NaN  | <b>1850</b>   |
| REL      | -2,433355 | 0,740747  | <b>-0,846304</b>  | 1521 | 2485 | <b>2003</b>   |
| HGF      | -0,359164 | -1,333401 | <b>-0,8462825</b> | 1142 | 1756 | <b>1449</b>   |
| XRCC1    | -1,173195 | -0,519334 | <b>-0,8462645</b> | 779  | 1022 | <b>900,5</b>  |
| ZNF560   | -1,158111 | -0,534119 | <b>-0,846115</b>  | 2419 | 2696 | <b>2557,5</b> |
| ATG4D    | -0,228882 | -1,462981 | <b>-0,8459315</b> | 1216 | 2060 | <b>1638</b>   |
| ADCK5    | -0,75547  | -0,936352 | <b>-0,845911</b>  | 1400 | 1943 | <b>1671,5</b> |
| NRARP    | -0,689162 | -1,002341 | <b>-0,8457515</b> | 209  | 1475 | <b>842</b>    |
| DBI      | -0,13089  | -1,559285 | <b>-0,8450875</b> | 1480 | 2270 | <b>1875</b>   |
| TTC15    | -0,902148 | -0,78794  | <b>-0,845044</b>  | 1831 | 2297 | <b>2064</b>   |
| CAV3     | -1,260959 | -0,429016 | <b>-0,8449875</b> | 1588 | 1547 | <b>1567,5</b> |
| FAM174A  | -1,145625 | -0,544304 | <b>-0,8449645</b> | 1397 | 1966 | <b>1681,5</b> |
| COG6     | -0,844927 | NaN       | <b>-0,844927</b>  | 1407 | NaN  | <b>1407</b>   |
| CYP2J2   | -1,441425 | -0,247833 | <b>-0,844629</b>  | 1711 | 1716 | <b>1713,5</b> |
| FGF10    | -0,741341 | -0,946927 | <b>-0,844134</b>  | 1276 | 1622 | <b>1449</b>   |
| MIS18BP1 | -0,613444 | -1,074769 | <b>-0,8441065</b> | 1904 | 2013 | <b>1958,5</b> |
| FRMD5    | -0,843829 | NaN       | <b>-0,843829</b>  | 1795 | NaN  | <b>1795</b>   |
| BTNL9    | -0,843747 | NaN       | <b>-0,843747</b>  | 1659 | NaN  | <b>1659</b>   |
| CCR8     | -0,843687 | NaN       | <b>-0,843687</b>  | 944  | NaN  | <b>944</b>    |

|          |           |           |                   |      |      |               |
|----------|-----------|-----------|-------------------|------|------|---------------|
| MTX3     | -0,717617 | -0,969671 | <b>-0,843644</b>  | 1462 | 1783 | <b>1622,5</b> |
| RQCD1    | -1,927393 | 0,240698  | <b>-0,8433475</b> | 1984 | 2086 | <b>2035</b>   |
| PACRG    | -1,177677 | -0,50834  | <b>-0,8430085</b> | 1670 | 1921 | <b>1795,5</b> |
| GRAMD1B  | -1,990543 | 0,304736  | <b>-0,8429035</b> | 1590 | 1794 | <b>1692</b>   |
| C6orf204 | -1,185877 | -0,499536 | <b>-0,8427065</b> | 1778 | 2476 | <b>2127</b>   |
| CCT4     | -0,841851 | -0,843381 | <b>-0,842616</b>  | 1450 | 1589 | <b>1519,5</b> |
| RNF123   | -0,062666 | -1,622537 | <b>-0,8426015</b> | 1427 | 2791 | <b>2109</b>   |
| ZNF611   | -1,069326 | -0,61559  | <b>-0,842458</b>  | 1962 | 3144 | <b>2553</b>   |
| FADS6    | -0,407569 | -1,277155 | <b>-0,842362</b>  | 1195 | 1795 | <b>1495</b>   |
| CAMK2A   | -0,172404 | -1,511747 | <b>-0,8420755</b> | 1655 | 2110 | <b>1882,5</b> |
| TMEM25   | -0,260178 | -1,423764 | <b>-0,841971</b>  | 1618 | 1990 | <b>1804</b>   |
| SOAT2    | -0,383851 | -1,299586 | <b>-0,8417185</b> | 1491 | 1927 | <b>1709</b>   |
| FANCF    | -0,933763 | -0,749573 | <b>-0,841668</b>  | 1829 | 2110 | <b>1969,5</b> |
| ZNHIT3   | -1,41968  | -0,263651 | <b>-0,8416655</b> | 1331 | 1778 | <b>1554,5</b> |
| CHCHD10  | -0,841545 | NaN       | <b>-0,841545</b>  | 1549 | NaN  | <b>1549</b>   |
| TMEM9B   | -0,879659 | -0,802114 | <b>-0,8408865</b> | 1541 | 1943 | <b>1742</b>   |
| C12orf39 | -0,840122 | NaN       | <b>-0,840122</b>  | 1461 | NaN  | <b>1461</b>   |
| ITFG3    | -0,841991 | -0,83802  | <b>-0,8400055</b> | 1791 | 2158 | <b>1974,5</b> |
| KCNK12   | -0,512516 | -1,167493 | <b>-0,8400045</b> | 1372 | 2732 | <b>2052</b>   |
| ALG9     | -0,839927 | NaN       | <b>-0,839927</b>  | 1635 | NaN  | <b>1635</b>   |
| IERS5    | -1,52563  | -0,15369  | <b>-0,83966</b>   | 1720 | 2196 | <b>1958</b>   |
| EMP1     | -1,917136 | 0,237927  | <b>-0,8396045</b> | 1345 | 1915 | <b>1630</b>   |
| RAD9A    | -0,60674  | -1,072416 | <b>-0,839578</b>  | 2175 | 2180 | <b>2177,5</b> |
| SGSM3    | -0,407054 | -1,271157 | <b>-0,8391055</b> | 1358 | 1735 | <b>1546,5</b> |
| C1orf130 | -0,838608 | NaN       | <b>-0,838608</b>  | 1573 | NaN  | <b>1573</b>   |
| ANXA1    | -0,8926   | -0,784506 | <b>-0,838553</b>  | 1579 | 1782 | <b>1680,5</b> |
| USP9X    | -0,957979 | -0,718267 | <b>-0,838123</b>  | 2114 | 2179 | <b>2146,5</b> |
| ALKBH8   | -0,15209  | -1,524132 | <b>-0,838111</b>  | 1922 | 2556 | <b>2239</b>   |
| CTNNB1   | -0,694702 | -0,981471 | <b>-0,8380865</b> | 1887 | 2001 | <b>1944</b>   |
| ASH1L    | -1,195259 | -0,480636 | <b>-0,8379475</b> | 1643 | 2264 | <b>1953,5</b> |
| ADH4     | -0,433961 | -1,241779 | <b>-0,83787</b>   | 978  | 2262 | <b>1620</b>   |
| CALML6   | -0,837762 | NaN       | <b>-0,837762</b>  | 1628 | NaN  | <b>1628</b>   |
| GPBAR1   | -0,649003 | -1,026486 | <b>-0,8377445</b> | 1686 | 1946 | <b>1816</b>   |
| C3orf45  | -0,837649 | NaN       | <b>-0,837649</b>  | 1251 | NaN  | <b>1251</b>   |

|            |           |           |                   |      |      |               |
|------------|-----------|-----------|-------------------|------|------|---------------|
| KIAA0430   | -1,597965 | -0,076467 | <b>-0,837216</b>  | 1863 | 2015 | <b>1939</b>   |
| RNASEH2B   | -0,907034 | -0,766652 | <b>-0,836843</b>  | 1619 | 2308 | <b>1963,5</b> |
| HECW2      | -0,651538 | -1,022071 | <b>-0,8368045</b> | 1901 | 2675 | <b>2288</b>   |
| TRIM59     | -1,749018 | 0,075491  | <b>-0,8367635</b> | 2184 | 3142 | <b>2663</b>   |
| TLL13      | -0,84163  | -0,831805 | <b>-0,8367175</b> | 1274 | 1604 | <b>1439</b>   |
| AAAS       | 0,381979  | -2,055196 | <b>-0,8366085</b> | 1573 | 2195 | <b>1884</b>   |
| ADI1       | -0,630272 | -1,042497 | <b>-0,8363845</b> | 1440 | 1816 | <b>1628</b>   |
| TINAG      | -1,107028 | -0,56479  | <b>-0,835909</b>  | 1672 | 2151 | <b>1911,5</b> |
| TPK1       | 0,25851   | -1,930245 | <b>-0,8358675</b> | 1342 | 2281 | <b>1811,5</b> |
| CLDN14     | -0,473992 | -1,19728  | <b>-0,835636</b>  | 1091 | 1183 | <b>1137</b>   |
| USO1       | -0,094409 | -1,576592 | <b>-0,8355005</b> | 1647 | 2195 | <b>1921</b>   |
| NUPR1      | -0,835342 | NaN       | <b>-0,835342</b>  | 1558 | NaN  | <b>1558</b>   |
| TRIP13     | NaN       | -0,834834 | <b>-0,834834</b>  | NaN  | 1842 | <b>1842</b>   |
| SURF2      | -0,834635 | NaN       | <b>-0,834635</b>  | 1536 | NaN  | <b>1536</b>   |
| ZNF770     | -0,834588 | NaN       | <b>-0,834588</b>  | 2052 | NaN  | <b>2052</b>   |
| PIGQ       | -0,708134 | -0,959181 | <b>-0,8336575</b> | 1266 | 1966 | <b>1616</b>   |
| DLL1       | -0,856259 | -0,811039 | <b>-0,833649</b>  | 1165 | 1777 | <b>1471</b>   |
| ZNF234     | -0,583801 | -1,082653 | <b>-0,833227</b>  | 1709 | 2635 | <b>2172</b>   |
| FMO4       | -0,910661 | -0,755657 | <b>-0,833159</b>  | 1782 | 2315 | <b>2048,5</b> |
| STAP2      | -0,636087 | -1,029875 | <b>-0,832981</b>  | 1579 | 1836 | <b>1707,5</b> |
| KPNB1      | -2,160695 | 0,494863  | <b>-0,832916</b>  | 734  | 743  | <b>738,5</b>  |
| ULBP1      | -0,895955 | -0,769774 | <b>-0,8328645</b> | 1517 | 1493 | <b>1505</b>   |
| RFK        | -1,83258  | 0,166906  | <b>-0,832837</b>  | 1892 | 2218 | <b>2055</b>   |
| HIST1H1D   | -0,976767 | -0,688354 | <b>-0,8325605</b> | 856  | 1728 | <b>1292</b>   |
| TRIB2      | -1,169368 | -0,495392 | <b>-0,83238</b>   | 1742 | 2319 | <b>2030,5</b> |
| TRAPPC1    | -0,875634 | -0,788892 | <b>-0,832263</b>  | 1621 | 1796 | <b>1708,5</b> |
| WWP1       | -0,829914 | -0,83458  | <b>-0,832247</b>  | 2212 | 2678 | <b>2445</b>   |
| HYDIN      | -0,831788 | NaN       | <b>-0,831788</b>  | 1228 | NaN  | <b>1228</b>   |
| P2RY12     | -0,831422 | NaN       | <b>-0,831422</b>  | 1429 | NaN  | <b>1429</b>   |
| UBE3B      | -0,770434 | -0,89236  | <b>-0,831397</b>  | 1684 | 2442 | <b>2063</b>   |
| CYP20A1    | -0,346861 | -1,315694 | <b>-0,8312775</b> | 1438 | 2172 | <b>1805</b>   |
| SAMD1      | -0,919554 | -0,742789 | <b>-0,8311715</b> | 1222 | 1519 | <b>1370,5</b> |
| ATOX1      | -0,291951 | -1,370292 | <b>-0,8311215</b> | 1352 | 1993 | <b>1672,5</b> |
| ST6GALNAC6 | -0,891036 | -0,770527 | <b>-0,8307815</b> | 824  | 1435 | <b>1129,5</b> |

|          |           |           |                   |      |      |               |
|----------|-----------|-----------|-------------------|------|------|---------------|
| IFT57    | -1,365604 | -0,29582  | <b>-0,830712</b>  | 1666 | 2933 | <b>2299,5</b> |
| NIT1     | -0,401131 | -1,259245 | <b>-0,830188</b>  | 329  | 774  | <b>551,5</b>  |
| ENY2     | -0,829756 | NaN       | <b>-0,829756</b>  | 1723 | NaN  | <b>1723</b>   |
| TTC23    | -0,715622 | -0,942809 | <b>-0,8292155</b> | 1375 | 1783 | <b>1579</b>   |
| UBXN6    | -0,232356 | -1,426048 | <b>-0,829202</b>  | 1204 | 1572 | <b>1388</b>   |
| AKAP8    | -1,550565 | -0,106724 | <b>-0,8286445</b> | 1878 | 2750 | <b>2314</b>   |
| SRSF12   | -0,319013 | -1,338097 | <b>-0,828555</b>  | 1832 | 1697 | <b>1764,5</b> |
| LEPRE1   | -1,143676 | -0,513322 | <b>-0,828499</b>  | 1182 | 1716 | <b>1449</b>   |
| IKZF1    | -0,512814 | -1,144181 | <b>-0,8284975</b> | 1844 | 2286 | <b>2065</b>   |
| TMEM155  | -0,82774  | NaN       | <b>-0,82774</b>   | 1573 | NaN  | <b>1573</b>   |
| NAGLU    | 0,076404  | -1,731867 | <b>-0,8277315</b> | 1423 | 1891 | <b>1657</b>   |
| DUSP7    | -0,415516 | -1,239499 | <b>-0,8275075</b> | 1981 | 2023 | <b>2002</b>   |
| TLX1NB   | -0,827466 | NaN       | <b>-0,827466</b>  | 1095 | NaN  | <b>1095</b>   |
| OTX2     | -0,827446 | NaN       | <b>-0,827446</b>  | 1506 | NaN  | <b>1506</b>   |
| ATP1A3   | -0,901926 | -0,752658 | <b>-0,827292</b>  | 2055 | 2513 | <b>2284</b>   |
| CAD      | -1,194167 | -0,458735 | <b>-0,826451</b>  | 1240 | 1323 | <b>1281,5</b> |
| DNAJB7   | -0,684397 | -0,968425 | <b>-0,826411</b>  | 2192 | 2045 | <b>2118,5</b> |
| PVALB    | -0,826369 | NaN       | <b>-0,826369</b>  | 1427 | NaN  | <b>1427</b>   |
| UTP23    | -1,107489 | -0,544743 | <b>-0,826116</b>  | 1234 | 1850 | <b>1542</b>   |
| OR1D2    | -0,328183 | -1,323947 | <b>-0,826065</b>  | 1367 | 2331 | <b>1849</b>   |
| ITGAL    | -0,742011 | -0,908896 | <b>-0,8254535</b> | 1334 | 1631 | <b>1482,5</b> |
| GLIS1    | -0,805527 | -0,844482 | <b>-0,8250045</b> | 1519 | 1878 | <b>1698,5</b> |
| ZNF708   | -1,237254 | -0,411576 | <b>-0,824415</b>  | 1789 | 1844 | <b>1816,5</b> |
| PDHA2    | -0,417939 | -1,230166 | <b>-0,8240525</b> | 1609 | 1773 | <b>1691</b>   |
| PDIA5    | -0,628073 | -1,019481 | <b>-0,823777</b>  | 1588 | 2891 | <b>2239,5</b> |
| SYNE2    | -1,871111 | 0,223809  | <b>-0,8236505</b> | 1718 | 1440 | <b>1579</b>   |
| PSMC5    | -0,419308 | -1,22788  | <b>-0,823594</b>  | 923  | 919  | <b>921</b>    |
| ARSK     | -0,238603 | -1,408459 | <b>-0,823531</b>  | 1459 | 1495 | <b>1477</b>   |
| ARHGEF15 | -1,306066 | -0,340806 | <b>-0,823436</b>  | 2059 | 2246 | <b>2152,5</b> |
| XDH      | -1,176373 | -0,470195 | <b>-0,823284</b>  | 1104 | 1396 | <b>1250</b>   |
| CEP350   | -0,823226 | NaN       | <b>-0,823226</b>  | 1566 | NaN  | <b>1566</b>   |
| WNK2     | -1,191039 | -0,455289 | <b>-0,823164</b>  | 1832 | 2126 | <b>1979</b>   |
| DEFB136  | -0,867254 | -0,778656 | <b>-0,822955</b>  | 1269 | 1861 | <b>1565</b>   |
| ZNF540   | -1,155567 | -0,489696 | <b>-0,8226315</b> | 1799 | 2096 | <b>1947,5</b> |

|          |           |           |                   |      |      |               |
|----------|-----------|-----------|-------------------|------|------|---------------|
| FAM195B  | -1,459157 | -0,185932 | <b>-0,8225445</b> | 1889 | 2589 | <b>2239</b>   |
| TLE1     | -0,526701 | -1,116471 | <b>-0,821586</b>  | 1060 | 1794 | <b>1427</b>   |
| ZNF165   | -0,821366 | NaN       | <b>-0,821366</b>  | 1756 | NaN  | <b>1756</b>   |
| C1orf172 | -0,618739 | -1,023696 | <b>-0,8212175</b> | 1108 | 1664 | <b>1386</b>   |
| RAB3C    | -0,885426 | -0,756877 | <b>-0,8211515</b> | 2185 | 3052 | <b>2618,5</b> |
| ERCC8    | -0,289492 | -1,35258  | <b>-0,821036</b>  | 1076 | 1810 | <b>1443</b>   |
| OR10S1   | -0,557866 | -1,08416  | <b>-0,821013</b>  | 1395 | 2663 | <b>2029</b>   |
| ZNF592   | -0,452294 | -1,189237 | <b>-0,8207655</b> | 1404 | 2226 | <b>1815</b>   |
| ARHGEF18 | -1,018092 | -0,622816 | <b>-0,820454</b>  | 2011 | 2968 | <b>2489,5</b> |
| ANKRD54  | -0,820278 | NaN       | <b>-0,820278</b>  | 1521 | NaN  | <b>1521</b>   |
| NLRC5    | -0,611015 | -1,028893 | <b>-0,819954</b>  | 1054 | 2377 | <b>1715,5</b> |
| SCN11A   | -1,447795 | -0,192018 | <b>-0,8199065</b> | 1796 | 2155 | <b>1975,5</b> |
| CABS1    | -0,8193   | NaN       | <b>-0,8193</b>    | 1512 | NaN  | <b>1512</b>   |
| MRVI1    | -0,129153 | -1,508957 | <b>-0,819055</b>  | 2032 | 2964 | <b>2498</b>   |
| PKP3     | -0,595786 | -1,042172 | <b>-0,818979</b>  | 1510 | 2047 | <b>1778,5</b> |
| PPIL1    | -1,130381 | -0,50724  | <b>-0,8188105</b> | 1703 | 2428 | <b>2065,5</b> |
| COL23A1  | -0,138644 | -1,49872  | <b>-0,818682</b>  | 1712 | 2155 | <b>1933,5</b> |
| NOLC1    | -0,060314 | -1,576857 | <b>-0,8185855</b> | 1811 | 2029 | <b>1920</b>   |
| GYS1     | NaN       | -0,818383 | <b>-0,818383</b>  | NaN  | 2688 | <b>2688</b>   |
| TMEM41B  | -1,180405 | -0,456093 | <b>-0,818249</b>  | 1614 | 2367 | <b>1990,5</b> |
| GBA3     | -1,022997 | -0,613435 | <b>-0,818216</b>  | 1623 | 2463 | <b>2043</b>   |
| OR5AS1   | -0,639892 | -0,996536 | <b>-0,818214</b>  | 1996 | 2222 | <b>2109</b>   |
| OR2M2    | -1,655144 | 0,019102  | <b>-0,818021</b>  | 1744 | 2510 | <b>2127</b>   |
| CHGA     | -0,818003 | NaN       | <b>-0,818003</b>  | 1324 | NaN  | <b>1324</b>   |
| NCOA1    | -0,90963  | -0,726348 | <b>-0,817989</b>  | 2117 | 2488 | <b>2302,5</b> |
| FKBP7    | -0,366957 | -1,268618 | <b>-0,8177875</b> | 1735 | 2482 | <b>2108,5</b> |
| SCFD1    | -0,684966 | -0,950593 | <b>-0,8177795</b> | 1370 | 1604 | <b>1487</b>   |
| ENPP7    | -0,857989 | -0,776387 | <b>-0,817188</b>  | 1964 | 2503 | <b>2233,5</b> |
| RAB5B    | -0,792066 | -0,841921 | <b>-0,8169935</b> | 1362 | 2125 | <b>1743,5</b> |
| PHF2     | -1,815414 | 0,182528  | <b>-0,816443</b>  | 1870 | 2444 | <b>2157</b>   |
| RIN2     | -0,816429 | NaN       | <b>-0,816429</b>  | 1736 | NaN  | <b>1736</b>   |
| NDUFS7   | 0,271614  | -1,904204 | <b>-0,816295</b>  | 1295 | 2000 | <b>1647,5</b> |
| PCDHB15  | -0,816182 | NaN       | <b>-0,816182</b>  | 1248 | NaN  | <b>1248</b>   |
| C20orf26 | -0,835618 | -0,796666 | <b>-0,816142</b>  | 1628 | 2479 | <b>2053,5</b> |



|          |           |           |                   |      |      |               |
|----------|-----------|-----------|-------------------|------|------|---------------|
| INSIG1   | -0,415964 | -1,215641 | <b>-0,8158025</b> | 1415 | 1167 | <b>1291</b>   |
| RRP36    | -0,521737 | -1,109778 | <b>-0,8157575</b> | 1259 | 1788 | <b>1523,5</b> |
| ABP1     | -1,235904 | -0,395348 | <b>-0,815626</b>  | 1657 | 2387 | <b>2022</b>   |
| ADARB2   | -0,815446 | NaN       | <b>-0,815446</b>  | 895  | NaN  | <b>895</b>    |
| TRAF4    | -0,783814 | -0,846633 | <b>-0,8152235</b> | 1492 | 2280 | <b>1886</b>   |
| SKAP1    | -1,319071 | -0,310861 | <b>-0,814966</b>  | 1112 | 1596 | <b>1354</b>   |
| QRICH1   | -1,053669 | -0,576126 | <b>-0,8148975</b> | 1398 | 2409 | <b>1903,5</b> |
| MPP2     | -0,88419  | -0,74435  | <b>-0,81427</b>   | 1467 | 1630 | <b>1548,5</b> |
| PRKCA    | -0,562452 | -1,065153 | <b>-0,8138025</b> | 1587 | 2631 | <b>2109</b>   |
| GPD1L    | -0,610629 | -1,016379 | <b>-0,813504</b>  | 1567 | 2104 | <b>1835,5</b> |
| ZBTB5    | -1,194354 | -0,430866 | <b>-0,81261</b>   | 1422 | 2226 | <b>1824</b>   |
| LEMD1    | -0,90262  | -0,722577 | <b>-0,8125985</b> | 1690 | 2303 | <b>1996,5</b> |
| RAB5A    | -0,748288 | -0,876723 | <b>-0,8125055</b> | 1740 | 1879 | <b>1809,5</b> |
| ZNF211   | -0,283068 | -1,341776 | <b>-0,812422</b>  | 1329 | 2094 | <b>1711,5</b> |
| AFM      | -0,541891 | -1,082858 | <b>-0,8123745</b> | 1688 | 2021 | <b>1854,5</b> |
| STC2     | -0,833066 | -0,791491 | <b>-0,8122785</b> | 1774 | 1948 | <b>1861</b>   |
| C14orf28 | -0,478283 | -1,145865 | <b>-0,812074</b>  | 1288 | 1349 | <b>1318,5</b> |
| PDLIM5   | -0,812004 | NaN       | <b>-0,812004</b>  | 1928 | NaN  | <b>1928</b>   |
| RPGR     | -1,133181 | -0,490515 | <b>-0,811848</b>  | 1680 | 1738 | <b>1709</b>   |
| ATP6V0C  | -0,511607 | -1,111261 | <b>-0,811434</b>  | 1682 | 1817 | <b>1749,5</b> |
| SCD      | -0,755984 | -0,86552  | <b>-0,810752</b>  | 1476 | 2028 | <b>1752</b>   |
| AMTN     | -0,810245 | NaN       | <b>-0,810245</b>  | 1782 | NaN  | <b>1782</b>   |
| MICB     | -0,915511 | -0,704613 | <b>-0,810062</b>  | 1432 | 1624 | <b>1528</b>   |
| CSK      | -0,355935 | -1,264091 | <b>-0,810013</b>  | 1901 | 1969 | <b>1935</b>   |
| TRPS1    | NaN       | -0,809902 | <b>-0,809902</b>  | NaN  | 2110 | <b>2110</b>   |
| PRPF4B   | -0,537763 | -1,081702 | <b>-0,8097325</b> | 1567 | 1957 | <b>1762</b>   |
| ASB6     | -0,938907 | -0,679804 | <b>-0,8093555</b> | 1731 | 2524 | <b>2127,5</b> |
| PTS      | -1,172953 | -0,445597 | <b>-0,809275</b>  | 1445 | 1954 | <b>1699,5</b> |
| D2HGDH   | -0,808701 | NaN       | <b>-0,808701</b>  | 1473 | NaN  | <b>1473</b>   |
| PSMC6    | -0,376996 | -1,240287 | <b>-0,8086415</b> | 896  | 1336 | <b>1116</b>   |
| FAT1     | -1,000122 | -0,616214 | <b>-0,808168</b>  | 1496 | 2180 | <b>1838</b>   |
| SLC47A2  | -0,795071 | -0,820685 | <b>-0,807878</b>  | 1818 | 2252 | <b>2035</b>   |
| RPP30    | -1,104825 | -0,510496 | <b>-0,8076605</b> | 1279 | 1634 | <b>1456,5</b> |
| SLC44A1  | -0,229986 | -1,383401 | <b>-0,8066935</b> | 1845 | 3157 | <b>2501</b>   |

|          |           |           |                   |      |      |               |
|----------|-----------|-----------|-------------------|------|------|---------------|
| UTP14A   | -0,80666  | NaN       | <b>-0,80666</b>   | 1406 | NaN  | <b>1406</b>   |
| MEIS1    | -0,945743 | -0,667471 | <b>-0,806607</b>  | 661  | 1019 | <b>840</b>    |
| DOK4     | -0,806604 | NaN       | <b>-0,806604</b>  | 1575 | NaN  | <b>1575</b>   |
| TLR4     | -1,189459 | -0,423684 | <b>-0,8065715</b> | 1871 | 2323 | <b>2097</b>   |
| GDF7     | -0,911165 | -0,701776 | <b>-0,8064705</b> | 1123 | 2067 | <b>1595</b>   |
| TIMP2    | -0,757384 | -0,855105 | <b>-0,8062445</b> | 1768 | 2699 | <b>2233,5</b> |
| ANKRD9   | -1,124252 | -0,488031 | <b>-0,8061415</b> | 1344 | 1319 | <b>1331,5</b> |
| ESYT1    | -0,805877 | NaN       | <b>-0,805877</b>  | 1677 | NaN  | <b>1677</b>   |
| SPTBN1   | -0,615834 | -0,994974 | <b>-0,805404</b>  | 1207 | 1698 | <b>1452,5</b> |
| C20orf54 | -1,55381  | -0,056726 | <b>-0,805268</b>  | 1517 | 1923 | <b>1720</b>   |
| FAM150A  | -1,298505 | -0,31154  | <b>-0,8050225</b> | 1742 | 1625 | <b>1683,5</b> |
| LCORL    | -1,114454 | -0,494409 | <b>-0,8044315</b> | 1670 | 2305 | <b>1987,5</b> |
| MT1F     | -0,735763 | -0,872457 | <b>-0,80411</b>   | 1196 | 1358 | <b>1277</b>   |
| RGR      | -0,803855 | NaN       | <b>-0,803855</b>  | 1386 | NaN  | <b>1386</b>   |
| GALNT7   | -0,977408 | -0,629617 | <b>-0,8035125</b> | 1336 | 1648 | <b>1492</b>   |
| 15-sept  | -1,247807 | -0,358892 | <b>-0,8033495</b> | 1499 | 2223 | <b>1861</b>   |
| SH2D6    | -0,168961 | -1,436836 | <b>-0,8028985</b> | 1084 | 2045 | <b>1564,5</b> |
| HHIP     | -0,802204 | NaN       | <b>-0,802204</b>  | 1822 | NaN  | <b>1822</b>   |
| C11orf75 | -0,261292 | -1,342686 | <b>-0,801989</b>  | 1503 | 1904 | <b>1703,5</b> |
| NEFM     | -0,849686 | -0,754064 | <b>-0,801875</b>  | 1443 | 2044 | <b>1743,5</b> |
| MFN1     | -0,764096 | -0,83846  | <b>-0,801278</b>  | 1359 | 2014 | <b>1686,5</b> |
| GALR2    | -0,801125 | NaN       | <b>-0,801125</b>  | 1579 | NaN  | <b>1579</b>   |
| NPPC     | -0,80086  | NaN       | <b>-0,80086</b>   | 1675 | NaN  | <b>1675</b>   |
| TBC1D20  | -0,298564 | -1,302937 | <b>-0,8007505</b> | 1414 | 2593 | <b>2003,5</b> |
| DSC3     | -1,087775 | -0,513712 | <b>-0,8007435</b> | 1940 | 2130 | <b>2035</b>   |
| TPCN1    | -0,505204 | -1,09618  | <b>-0,800692</b>  | 1996 | 2050 | <b>2023</b>   |
| UFD1L    | -0,736787 | -0,86326  | <b>-0,8000235</b> | 1562 | 2151 | <b>1856,5</b> |
| CPA1     | -1,253751 | -0,346081 | <b>-0,799916</b>  | 1832 | 2112 | <b>1972</b>   |
| COX6C    | -0,918193 | -0,681024 | <b>-0,7996085</b> | 1490 | 2528 | <b>2009</b>   |
| SELENBP1 | -1,457036 | -0,141844 | <b>-0,79944</b>   | 1334 | 2540 | <b>1937</b>   |
| GNG8     | -0,499268 | -1,09913  | <b>-0,799199</b>  | 576  | 1447 | <b>1011,5</b> |
| USP36    | -0,575308 | -1,022947 | <b>-0,7991275</b> | 1162 | 2180 | <b>1671</b>   |
| DGKD     | -0,698663 | -0,898925 | <b>-0,798794</b>  | 1637 | 2080 | <b>1858,5</b> |
| PGBD1    | -0,852759 | -0,744457 | <b>-0,798608</b>  | 1775 | 2661 | <b>2218</b>   |

|          |           |           |                   |      |      |               |
|----------|-----------|-----------|-------------------|------|------|---------------|
| FBXO47   | -1,842227 | 0,24508   | <b>-0,7985735</b> | 1642 | 2550 | <b>2096</b>   |
| HADH     | -0,961633 | -0,63533  | <b>-0,7984815</b> | 1869 | 2735 | <b>2302</b>   |
| SLC25A13 | -0,355463 | -1,241224 | <b>-0,7983435</b> | 1457 | 2806 | <b>2131,5</b> |
| LRRC26   | -1,865571 | 0,269381  | <b>-0,798095</b>  | 1619 | 2286 | <b>1952,5</b> |
| EFNA1    | -0,8219   | -0,774197 | <b>-0,7980485</b> | 1857 | 2137 | <b>1997</b>   |
| INTS6    | -1,248475 | -0,347247 | <b>-0,797861</b>  | 1566 | 1971 | <b>1768,5</b> |
| UBL3     | -1,374145 | -0,220351 | <b>-0,797248</b>  | 407  | 1328 | <b>867,5</b>  |
| GPR141   | -0,797013 | NaN       | <b>-0,797013</b>  | 1822 | NaN  | <b>1822</b>   |
| DNAH10   | -0,522533 | -1,071364 | <b>-0,7969485</b> | 1263 | 1743 | <b>1503</b>   |
| POLR2E   | -0,92849  | -0,664849 | <b>-0,7966695</b> | 1060 | 1229 | <b>1144,5</b> |
| PKLR     | -0,626281 | -0,96655  | <b>-0,7964155</b> | 2138 | 2450 | <b>2294</b>   |
| NFE2     | -0,605395 | -0,986084 | <b>-0,7957395</b> | 1388 | 1528 | <b>1458</b>   |
| KCNH7    | -0,616125 | -0,975268 | <b>-0,7956965</b> | 1340 | 1912 | <b>1626</b>   |
| HCN2     | 0,550558  | -2,141104 | <b>-0,795273</b>  | 1966 | 2767 | <b>2366,5</b> |
| STX5     | -0,795115 | NaN       | <b>-0,795115</b>  | 2014 | NaN  | <b>2014</b>   |
| HAS1     | -1,52206  | -0,067466 | <b>-0,794763</b>  | 1731 | 1697 | <b>1714</b>   |
| OR5J2    | -0,685781 | -0,902895 | <b>-0,794338</b>  | 2071 | 2367 | <b>2219</b>   |
| MYH3     | -0,847937 | -0,739631 | <b>-0,793784</b>  | 1127 | 1950 | <b>1538,5</b> |
| COP22    | -0,574789 | -1,01276  | <b>-0,7937745</b> | 2081 | 2077 | <b>2079</b>   |
| MICU1    | -1,109896 | -0,477304 | <b>-0,7936</b>    | 1572 | 1999 | <b>1785,5</b> |
| ZIM3     | -1,290637 | -0,296509 | <b>-0,793573</b>  | 1868 | 1842 | <b>1855</b>   |
| TFAP2C   | -0,853087 | -0,733967 | <b>-0,793527</b>  | 1311 | 1947 | <b>1629</b>   |
| USF1     | NaN       | -0,793296 | <b>-0,793296</b>  | NaN  | 2286 | <b>2286</b>   |
| RPA2     | -0,808708 | -0,777324 | <b>-0,793016</b>  | 1705 | 1371 | <b>1538</b>   |
| TBC1D22B | -0,792775 | NaN       | <b>-0,792775</b>  | 2214 | NaN  | <b>2214</b>   |
| CYP3A5   | -0,008269 | -1,577243 | <b>-0,792756</b>  | 1373 | 1812 | <b>1592,5</b> |
| FBXL12   | -0,934544 | -0,648822 | <b>-0,791683</b>  | 1919 | 3068 | <b>2493,5</b> |
| MAGEA11  | -0,790746 | NaN       | <b>-0,790746</b>  | 1372 | NaN  | <b>1372</b>   |
| UNC13C   | -0,845238 | -0,735965 | <b>-0,7906015</b> | 1980 | 1896 | <b>1938</b>   |
| HECA     | -0,366423 | -1,214596 | <b>-0,7905095</b> | 1522 | 1880 | <b>1701</b>   |
| OR4X2    | -0,505732 | -1,074883 | <b>-0,7903075</b> | 1495 | 2348 | <b>1921,5</b> |
| ME2      | -1,095482 | -0,484896 | <b>-0,790189</b>  | 2146 | 2733 | <b>2439,5</b> |
| JAKMIP1  | -1,443037 | -0,136429 | <b>-0,789733</b>  | 1981 | 2124 | <b>2052,5</b> |
| EMILIN2  | -0,686994 | -0,891589 | <b>-0,7892915</b> | 1029 | 1501 | <b>1265</b>   |

|          |           |           |                   |      |      |               |
|----------|-----------|-----------|-------------------|------|------|---------------|
| PCYOX1   | -1,105859 | -0,47139  | <b>-0,7886245</b> | 1436 | 1940 | <b>1688</b>   |
| NXPH1    | -0,005556 | -1,571446 | <b>-0,788501</b>  | 1935 | 1551 | <b>1743</b>   |
| HTR3A    | -0,440406 | -1,136178 | <b>-0,788292</b>  | 1620 | 1875 | <b>1747,5</b> |
| MALT1    | 0,308973  | -1,884721 | <b>-0,787874</b>  | 1036 | 1679 | <b>1357,5</b> |
| C16orf46 | -0,787255 | NaN       | <b>-0,787255</b>  | 1806 | NaN  | <b>1806</b>   |
| WDSUB1   | -1,038937 | -0,535571 | <b>-0,787254</b>  | 897  | 2236 | <b>1566,5</b> |
| CAPZB    | -1,633927 | 0,060008  | <b>-0,7869595</b> | 1243 | 1778 | <b>1510,5</b> |
| PREB     | -1,278671 | -0,295238 | <b>-0,7869545</b> | 1565 | 2058 | <b>1811,5</b> |
| AQP2     | -1,267354 | -0,30588  | <b>-0,786617</b>  | 1469 | 2083 | <b>1776</b>   |
| TP53I11  | -0,989534 | -0,583298 | <b>-0,786416</b>  | 1812 | 2609 | <b>2210,5</b> |
| DEPTOR   | 0,304899  | -1,874541 | <b>-0,784821</b>  | 1849 | 2302 | <b>2075,5</b> |
| KRTCAP2  | -0,784727 | NaN       | <b>-0,784727</b>  | 1674 | NaN  | <b>1674</b>   |
| ABCC5    | -1,118839 | -0,449433 | <b>-0,784136</b>  | 1044 | 1503 | <b>1273,5</b> |
| UQCR10   | -0,750308 | -0,817498 | <b>-0,783903</b>  | 1911 | 1795 | <b>1853</b>   |
| APBB1    | -0,886101 | -0,681337 | <b>-0,783719</b>  | 918  | 1218 | <b>1068</b>   |
| PHF6     | -0,733041 | -0,833837 | <b>-0,783439</b>  | 1150 | 2334 | <b>1742</b>   |
| MAVS     | -0,282675 | -1,28401  | <b>-0,7833425</b> | 1011 | 1639 | <b>1325</b>   |
| COL4A3BP | -0,888696 | -0,677938 | <b>-0,783317</b>  | 1519 | 1925 | <b>1722</b>   |
| GPR114   | -0,783266 | NaN       | <b>-0,783266</b>  | 1549 | NaN  | <b>1549</b>   |
| NIP7     | -0,841995 | -0,724218 | <b>-0,7831065</b> | 1719 | 2082 | <b>1900,5</b> |
| ACYP2    | -0,765632 | -0,800497 | <b>-0,7830645</b> | 1354 | 1465 | <b>1409,5</b> |
| RTN4R    | -1,677661 | 0,11319   | <b>-0,7822355</b> | 1989 | 2005 | <b>1997</b>   |
| HLA-DRA  | -1,14964  | -0,414644 | <b>-0,782142</b>  | 1501 | 1819 | <b>1660</b>   |
| SLC10A3  | -0,938749 | -0,624646 | <b>-0,7816975</b> | 956  | 1528 | <b>1242</b>   |
| JMY      | -0,820063 | -0,742376 | <b>-0,7812195</b> | 1871 | 2054 | <b>1962,5</b> |
| PRKCB    | -0,430474 | -1,130521 | <b>-0,7804975</b> | 1764 | 2120 | <b>1942</b>   |
| FAM134B  | -0,501941 | -1,059051 | <b>-0,780496</b>  | 1788 | 2621 | <b>2204,5</b> |
| GRIN2D   | -0,730531 | -0,830069 | <b>-0,7803</b>    | 1838 | 2770 | <b>2304</b>   |
| GCNT4    | -0,965369 | -0,594689 | <b>-0,780029</b>  | 1953 | 2001 | <b>1977</b>   |
| CLEC1A   | NaN       | -0,779975 | <b>-0,779975</b>  | NaN  | 2678 | <b>2678</b>   |
| FAM102A  | -0,993977 | -0,56591  | <b>-0,7799435</b> | 952  | 1351 | <b>1151,5</b> |
| FAM110A  | -0,603874 | -0,95599  | <b>-0,779932</b>  | 1589 | 2004 | <b>1796,5</b> |
| ENGASE   | -0,426957 | -1,132204 | <b>-0,7795805</b> | 1436 | 2137 | <b>1786,5</b> |
| SLC2A6   | -1,388359 | -0,170595 | <b>-0,779477</b>  | 1605 | 1714 | <b>1659,5</b> |

|          |           |           |                   |      |      |               |
|----------|-----------|-----------|-------------------|------|------|---------------|
| SLC50A1  | -1,236345 | -0,322009 | <b>-0,779177</b>  | 2168 | 2278 | <b>2223</b>   |
| LIN28B   | -0,77914  | NaN       | <b>-0,77914</b>   | 1553 | NaN  | <b>1553</b>   |
| KIAA1715 | -0,79205  | -0,766008 | <b>-0,779029</b>  | 1656 | 2050 | <b>1853</b>   |
| NDUFB3   | -1,254101 | -0,303078 | <b>-0,7785895</b> | 1198 | 1654 | <b>1426</b>   |
| BCL2L14  | -0,587771 | -0,969307 | <b>-0,778539</b>  | 1619 | 2007 | <b>1813</b>   |
| PWWP2B   | -0,966437 | -0,58992  | <b>-0,7781785</b> | 1674 | 2238 | <b>1956</b>   |
| TLR1     | -1,663802 | 0,10778   | <b>-0,778011</b>  | 1867 | 2026 | <b>1946,5</b> |
| LGALS13  | -0,721604 | -0,834393 | <b>-0,7779985</b> | 1630 | 2771 | <b>2200,5</b> |
| LCLAT1   | -0,977881 | -0,57798  | <b>-0,7779305</b> | 1278 | 1860 | <b>1569</b>   |
| TMEM126A | -0,488664 | -1,066368 | <b>-0,777516</b>  | 1721 | 2056 | <b>1888,5</b> |
| IER5L    | -1,115519 | -0,438473 | <b>-0,776996</b>  | 1487 | 1925 | <b>1706</b>   |
| IFT43    | -0,972085 | -0,581723 | <b>-0,776904</b>  | 2060 | 2401 | <b>2230,5</b> |
| GPR97    | -0,776891 | NaN       | <b>-0,776891</b>  | 1262 | NaN  | <b>1262</b>   |
| SDHC     | -1,725968 | 0,173563  | <b>-0,7762025</b> | 1543 | 2238 | <b>1890,5</b> |
| CCDC19   | -0,271493 | -1,279826 | <b>-0,7756595</b> | 1204 | 1831 | <b>1517,5</b> |
| ENOX1    | -0,775217 | NaN       | <b>-0,775217</b>  | 1424 | NaN  | <b>1424</b>   |
| IRS2     | -0,420228 | -1,129924 | <b>-0,775076</b>  | 1516 | 1724 | <b>1620</b>   |
| LDLR     | NaN       | -0,774959 | <b>-0,774959</b>  | NaN  | 2337 | <b>2337</b>   |
| KCNN4    | -0,608699 | -0,940089 | <b>-0,774394</b>  | 1973 | 2034 | <b>2003,5</b> |
| IL2      | -0,774106 | NaN       | <b>-0,774106</b>  | 1408 | NaN  | <b>1408</b>   |
| ZNF683   | -0,77391  | NaN       | <b>-0,77391</b>   | 1595 | NaN  | <b>1595</b>   |
| FANK1    | -1,260531 | -0,286064 | <b>-0,7732975</b> | 1427 | 1640 | <b>1533,5</b> |
| AIF1     | -0,41264  | -1,13269  | <b>-0,772665</b>  | 1535 | 2710 | <b>2122,5</b> |
| SLC25A46 | -0,772659 | NaN       | <b>-0,772659</b>  | 1845 | NaN  | <b>1845</b>   |
| C7orf51  | -0,637398 | -0,907903 | <b>-0,7726505</b> | 1305 | 1638 | <b>1471,5</b> |
| ADAMTSL5 | -1,101137 | -0,443812 | <b>-0,7724745</b> | 1505 | 2038 | <b>1771,5</b> |
| TMBIM1   | -0,362585 | -1,181857 | <b>-0,772221</b>  | 1919 | 2512 | <b>2215,5</b> |
| FAM200A  | -0,772147 | NaN       | <b>-0,772147</b>  | 1783 | NaN  | <b>1783</b>   |
| MS4A5    | -0,575514 | -0,968652 | <b>-0,772083</b>  | 1725 | 2313 | <b>2019</b>   |
| LRRC17   | -1,222889 | -0,320847 | <b>-0,771868</b>  | 1772 | 1807 | <b>1789,5</b> |
| DUSP11   | -1,504845 | -0,038309 | <b>-0,771577</b>  | 2089 | 2312 | <b>2200,5</b> |
| PLAGL2   | -1,368687 | -0,174448 | <b>-0,7715675</b> | 1346 | 2021 | <b>1683,5</b> |
| OR6B3    | -0,753528 | -0,788584 | <b>-0,771056</b>  | 1135 | 946  | <b>1040,5</b> |
| FSD2     | -0,919553 | -0,622538 | <b>-0,7710455</b> | 1594 | 1587 | <b>1590,5</b> |

|            |           |           |                   |      |      |               |
|------------|-----------|-----------|-------------------|------|------|---------------|
| WRN        | -1,105099 | -0,435541 | <b>-0,77032</b>   | 1484 | 1901 | <b>1692,5</b> |
| SIGLEC12   | -1,068888 | -0,471482 | <b>-0,770185</b>  | 1789 | 2016 | <b>1902,5</b> |
| CARD6      | -0,866537 | -0,67351  | <b>-0,7700235</b> | 1722 | 2107 | <b>1914,5</b> |
| C2orf76    | -1,248536 | -0,291473 | <b>-0,7700045</b> | 1587 | 2055 | <b>1821</b>   |
| C6orf203   | -1,190685 | -0,349268 | <b>-0,7699765</b> | 1576 | 2277 | <b>1926,5</b> |
| SMC1A      | -0,318834 | -1,221007 | <b>-0,7699205</b> | 676  | 2743 | <b>1709,5</b> |
| MED11      | -0,75817  | -0,781439 | <b>-0,7698045</b> | 1179 | 1221 | <b>1200</b>   |
| FAM49A     | -1,241334 | -0,297589 | <b>-0,7694615</b> | 1511 | 1810 | <b>1660,5</b> |
| UBA6       | -0,651204 | -0,887287 | <b>-0,7692455</b> | 1933 | 2720 | <b>2326,5</b> |
| PLAC9      | -0,915099 | -0,622828 | <b>-0,7689635</b> | 1255 | 1494 | <b>1374,5</b> |
| MKNK1      | -0,724895 | -0,812795 | <b>-0,768845</b>  | 1774 | 1927 | <b>1850,5</b> |
| STIM1      | -0,826687 | -0,710218 | <b>-0,7684525</b> | 1243 | 1575 | <b>1409</b>   |
| LTBP3      | -1,065291 | -0,470733 | <b>-0,768012</b>  | 1694 | 2598 | <b>2146</b>   |
| NDUFB2     | -0,351361 | -1,184475 | <b>-0,767918</b>  | 1438 | 1797 | <b>1617,5</b> |
| ST6GALNAC1 | -1,064963 | -0,47062  | <b>-0,7677915</b> | 1398 | 1736 | <b>1567</b>   |
| KCNJ14     | -1,005811 | -0,529272 | <b>-0,7675415</b> | 1820 | 2623 | <b>2221,5</b> |
| IRS1       | -1,315289 | -0,219238 | <b>-0,7672635</b> | 1358 | 1320 | <b>1339</b>   |
| PRDM8      | -1,202986 | -0,331257 | <b>-0,7671215</b> | 1650 | 2124 | <b>1887</b>   |
| DOK2       | -0,674114 | -0,858361 | <b>-0,7662375</b> | 1747 | 2521 | <b>2134</b>   |
| OR4C3      | -0,862949 | -0,669506 | <b>-0,7662275</b> | 1544 | 2122 | <b>1833</b>   |
| ETV6       | -0,1592   | -1,373047 | <b>-0,7661235</b> | 1519 | 1942 | <b>1730,5</b> |
| KCNJ4      | -1,356027 | -0,175608 | <b>-0,7658175</b> | 1426 | 1887 | <b>1656,5</b> |
| SDR42E1    | -1,308464 | -0,222738 | <b>-0,765601</b>  | 1765 | 2117 | <b>1941</b>   |
| SLC41A2    | -0,900608 | -0,630431 | <b>-0,7655195</b> | 1477 | 1832 | <b>1654,5</b> |
| MED23      | -1,474494 | -0,056375 | <b>-0,7654345</b> | 1838 | 3089 | <b>2463,5</b> |
| PSMB1      | 0,067245  | -1,596989 | <b>-0,764872</b>  | 656  | 1067 | <b>861,5</b>  |
| SNPH       | -0,373083 | -1,156397 | <b>-0,76474</b>   | 788  | 719  | <b>753,5</b>  |
| EN1        | -0,609182 | -0,919835 | <b>-0,7645085</b> | 710  | 1302 | <b>1006</b>   |
| C12orf24   | -0,764468 | NaN       | <b>-0,764468</b>  | 1503 | NaN  | <b>1503</b>   |
| MAP3K10    | -1,851277 | 0,32254   | <b>-0,7643685</b> | 1733 | 1910 | <b>1821,5</b> |
| RPL10A     | -0,76436  | NaN       | <b>-0,76436</b>   | 1061 | NaN  | <b>1061</b>   |
| HIPK3      | -0,597954 | -0,93001  | <b>-0,763982</b>  | 1783 | 1455 | <b>1619</b>   |
| TAS2R41    | -1,410913 | -0,116629 | <b>-0,763771</b>  | 1839 | 2191 | <b>2015</b>   |
| CRYZ       | -0,963494 | -0,564006 | <b>-0,76375</b>   | 1566 | 2125 | <b>1845,5</b> |

|          |           |           |                   |      |      |               |
|----------|-----------|-----------|-------------------|------|------|---------------|
| PSTPIP1  | -0,652576 | -0,874711 | <b>-0,7636435</b> | 1626 | 2122 | <b>1874</b>   |
| MAP6     | -1,771881 | 0,244792  | <b>-0,7635445</b> | 1538 | 1465 | <b>1501,5</b> |
| PDC      | -1,105282 | -0,421528 | <b>-0,763405</b>  | 1864 | 2173 | <b>2018,5</b> |
| LYAR     | -1,117667 | -0,408003 | <b>-0,762835</b>  | 1127 | 1531 | <b>1329</b>   |
| SCAMP1   | -1,737425 | 0,211939  | <b>-0,762743</b>  | 1473 | 2463 | <b>1968</b>   |
| OSBPL8   | -0,065036 | -1,459869 | <b>-0,7624525</b> | 1415 | 2125 | <b>1770</b>   |
| TYR      | -0,94749  | -0,577116 | <b>-0,762303</b>  | 1408 | 2208 | <b>1808</b>   |
| ARNTL2   | -0,986226 | -0,537402 | <b>-0,761814</b>  | 1310 | 1529 | <b>1419,5</b> |
| FMO2     | -1,368681 | -0,154819 | <b>-0,76175</b>   | 1721 | 1887 | <b>1804</b>   |
| TNNT2    | -1,196873 | -0,326201 | <b>-0,761537</b>  | 1475 | 2131 | <b>1803</b>   |
| PSKH2    | -1,179822 | -0,342332 | <b>-0,761077</b>  | 1564 | 2405 | <b>1984,5</b> |
| MID1IP1  | -0,632897 | -0,889005 | <b>-0,760951</b>  | 1422 | 2106 | <b>1764</b>   |
| MAGEA1   | -0,817048 | -0,704603 | <b>-0,7608255</b> | 1670 | 1857 | <b>1763,5</b> |
| MTMR12   | -0,518914 | -1,002705 | <b>-0,7608095</b> | 2059 | 1751 | <b>1905</b>   |
| ZNF41    | -0,708267 | -0,812864 | <b>-0,7605655</b> | 1036 | 1385 | <b>1210,5</b> |
| GYPA     | -0,67353  | -0,846457 | <b>-0,7599935</b> | 2111 | 2053 | <b>2082</b>   |
| PLCD3    | -0,880952 | -0,638944 | <b>-0,759948</b>  | 964  | 1263 | <b>1113,5</b> |
| ALDH18A1 | -1,16812  | -0,351295 | <b>-0,7597075</b> | 1083 | 1622 | <b>1352,5</b> |
| TMEM134  | -0,616938 | -0,902197 | <b>-0,7595675</b> | 1598 | 2326 | <b>1962</b>   |
| CXCR6    | -0,41955  | -1,097892 | <b>-0,758721</b>  | 1525 | 1803 | <b>1664</b>   |
| OR5L1    | 0,130195  | -1,647585 | <b>-0,758695</b>  | 1487 | 2806 | <b>2146,5</b> |
| TSPYL4   | -0,269295 | -1,24753  | <b>-0,7584125</b> | 1816 | 1713 | <b>1764,5</b> |
| BIK      | -1,26304  | -0,252643 | <b>-0,7578415</b> | 1658 | 2129 | <b>1893,5</b> |
| NEURL4   | -0,150598 | -1,364034 | <b>-0,757316</b>  | 1596 | 1632 | <b>1614</b>   |
| C9orf152 | -0,911999 | -0,602347 | <b>-0,757173</b>  | 1928 | 2243 | <b>2085,5</b> |
| KLKB1    | -1,147583 | -0,366756 | <b>-0,7571695</b> | 1798 | 1850 | <b>1824</b>   |
| CA10     | -0,599017 | -0,915069 | <b>-0,757043</b>  | 1860 | 2852 | <b>2356</b>   |
| SLC20A2  | -0,712064 | -0,801868 | <b>-0,756966</b>  | 1744 | 2350 | <b>2047</b>   |
| OPRM1    | -1,733447 | 0,219705  | <b>-0,756871</b>  | 2213 | 2865 | <b>2539</b>   |
| CDK12    | -0,964613 | -0,549089 | <b>-0,756851</b>  | 1579 | 1854 | <b>1716,5</b> |
| VKORC1L1 | -0,746093 | -0,767213 | <b>-0,756653</b>  | 1795 | 2165 | <b>1980</b>   |
| EIF3J    | -0,615189 | -0,897527 | <b>-0,756358</b>  | 1689 | 1911 | <b>1800</b>   |
| OR5P3    | -0,460583 | -1,050975 | <b>-0,755779</b>  | 1221 | 1762 | <b>1491,5</b> |
| CLK7     | -0,31587  | -1,1956   | <b>-0,755735</b>  | 1332 | 1650 | <b>1491</b>   |

|         |           |           |                   |      |      |               |
|---------|-----------|-----------|-------------------|------|------|---------------|
| HOMER2  | -0,899701 | -0,610528 | <b>-0,7551145</b> | 1768 | 2121 | <b>1944,5</b> |
| OFD1    | -0,348694 | -1,161496 | <b>-0,755095</b>  | 1352 | 1850 | <b>1601</b>   |
| TNP2    | -0,754912 | NaN       | <b>-0,754912</b>  | 1692 | NaN  | <b>1692</b>   |
| PRKAR2A | -0,107986 | -1,4018   | <b>-0,754893</b>  | 1758 | 2375 | <b>2066,5</b> |
| PRL     | -1,260728 | -0,248198 | <b>-0,754463</b>  | 1695 | 1879 | <b>1787</b>   |
| NSA2    | -0,754407 | NaN       | <b>-0,754407</b>  | 1192 | NaN  | <b>1192</b>   |
| SCGN    | -0,754165 | NaN       | <b>-0,754165</b>  | 1965 | NaN  | <b>1965</b>   |
| FTHL17  | -0,404575 | -1,103668 | <b>-0,7541215</b> | 2099 | 1996 | <b>2047,5</b> |
| SOX17   | -0,753861 | NaN       | <b>-0,753861</b>  | 1818 | NaN  | <b>1818</b>   |
| STAT2   | -0,979347 | -0,528034 | <b>-0,7536905</b> | 1524 | 1726 | <b>1625</b>   |
| PLCB1   | -1,357424 | -0,149671 | <b>-0,7535475</b> | 1749 | 2122 | <b>1935,5</b> |
| COL6A2  | -0,420594 | -1,085964 | <b>-0,753279</b>  | 1388 | 2617 | <b>2002,5</b> |
| SFXN1   | -0,559952 | -0,942862 | <b>-0,751407</b>  | 1656 | 2063 | <b>1859,5</b> |
| CCDC124 | -0,693024 | -0,809748 | <b>-0,751386</b>  | 1878 | 2410 | <b>2144</b>   |
| CENPH   | -0,956178 | -0,546338 | <b>-0,751258</b>  | 1787 | 1822 | <b>1804,5</b> |
| AHRR    | -0,598006 | -0,902832 | <b>-0,750419</b>  | 1690 | 2219 | <b>1954,5</b> |
| ACOT13  | NaN       | -0,750125 | <b>-0,750125</b>  | NaN  | 2563 | <b>2563</b>   |
| RAD52   | -0,664838 | -0,835268 | <b>-0,750053</b>  | 1755 | 1868 | <b>1811,5</b> |
| KCNE1   | 0,069622  | -1,569597 | <b>-0,7499875</b> | 1421 | 2906 | <b>2163,5</b> |
| LAMTOR1 | -0,749911 | NaN       | <b>-0,749911</b>  | 2034 | NaN  | <b>2034</b>   |
| CIDEA   | -0,400648 | -1,096836 | <b>-0,748742</b>  | 1355 | 1532 | <b>1443,5</b> |
| PIP5K1C | -1,22901  | -0,268402 | <b>-0,748706</b>  | 1838 | 2148 | <b>1993</b>   |
| NR5A2   | -1,302318 | -0,194043 | <b>-0,7481805</b> | 1363 | 2004 | <b>1683,5</b> |
| TBXAS1  | -1,030155 | -0,465953 | <b>-0,748054</b>  | 1852 | 2112 | <b>1982</b>   |
| OR51I1  | -0,411914 | -1,083459 | <b>-0,7476865</b> | 1449 | 2007 | <b>1728</b>   |
| FOXP1   | -0,652456 | -0,842091 | <b>-0,7472735</b> | 1388 | 2168 | <b>1778</b>   |
| RAVER1  | -0,374795 | -1,119505 | <b>-0,74715</b>   | 1346 | 1333 | <b>1339,5</b> |
| VHL     | -0,50308  | -0,991166 | <b>-0,747123</b>  | 1513 | 1912 | <b>1712,5</b> |
| CNOT3   | -0,263859 | -1,230248 | <b>-0,7470535</b> | 1525 | 2125 | <b>1825</b>   |
| SCARA3  | -0,471435 | -1,020662 | <b>-0,7460485</b> | 998  | 1132 | <b>1065</b>   |
| TMCC1   | -0,745995 | NaN       | <b>-0,745995</b>  | 1238 | NaN  | <b>1238</b>   |
| SIGIRR  | -1,12268  | -0,368878 | <b>-0,745779</b>  | 2006 | 2258 | <b>2132</b>   |
| IL10RB  | -0,789412 | -0,701805 | <b>-0,7456085</b> | 2121 | 2527 | <b>2324</b>   |
| ITPA    | -0,687002 | -0,80305  | <b>-0,745026</b>  | 1848 | 2419 | <b>2133,5</b> |



|         |           |           |                   |      |      |               |
|---------|-----------|-----------|-------------------|------|------|---------------|
| ASIP    | -0,744915 | NaN       | <b>-0,744915</b>  | 1893 | NaN  | <b>1893</b>   |
| BDP1    | -0,884751 | -0,604988 | <b>-0,7448695</b> | 1319 | 1343 | <b>1331</b>   |
| ATXN7   | -0,816805 | -0,672895 | <b>-0,74485</b>   | 1632 | 1928 | <b>1780</b>   |
| EPS8L2  | -0,146638 | -1,342554 | <b>-0,744596</b>  | 1408 | 1799 | <b>1603,5</b> |
| RBMS3   | 0,06271   | -1,551344 | <b>-0,744317</b>  | 841  | 1202 | <b>1021,5</b> |
| SSTR5   | -0,766643 | -0,72198  | <b>-0,7443115</b> | 866  | 1099 | <b>982,5</b>  |
| CC2D1A  | -0,744268 | NaN       | <b>-0,744268</b>  | 1265 | NaN  | <b>1265</b>   |
| ANGPTL2 | -1,059101 | -0,429247 | <b>-0,744174</b>  | 1667 | 2291 | <b>1979</b>   |
| TTC13   | -1,173439 | -0,314454 | <b>-0,7439465</b> | 1826 | 1960 | <b>1893</b>   |
| KCTD8   | -0,54552  | -0,941801 | <b>-0,7436605</b> | 1754 | 2681 | <b>2217,5</b> |
| CEP63   | -0,587454 | -0,899278 | <b>-0,743366</b>  | 1492 | 2294 | <b>1893</b>   |
| RABAC1  | 0,040244  | -1,525227 | <b>-0,7424915</b> | 1707 | 1889 | <b>1798</b>   |
| SLC4A11 | -0,853643 | -0,631067 | <b>-0,742355</b>  | 1585 | 1687 | <b>1636</b>   |
| LRIT1   | -0,773096 | -0,711569 | <b>-0,7423325</b> | 1315 | 2208 | <b>1761,5</b> |
| FBXL14  | -1,079812 | -0,403917 | <b>-0,7418645</b> | 1422 | 2295 | <b>1858,5</b> |
| HRC     | -0,67148  | -0,812166 | <b>-0,741823</b>  | 1014 | 1434 | <b>1224</b>   |
| ISCA2   | -0,741803 | NaN       | <b>-0,741803</b>  | 1781 | NaN  | <b>1781</b>   |
| SORCS2  | -0,741696 | NaN       | <b>-0,741696</b>  | 871  | NaN  | <b>871</b>    |
| PDIA6   | -0,463773 | -1,019233 | <b>-0,741503</b>  | 1356 | 2384 | <b>1870</b>   |
| SURF6   | -0,583437 | -0,899498 | <b>-0,7414675</b> | 1426 | 1781 | <b>1603,5</b> |
| CYLC2   | -0,991694 | -0,490719 | <b>-0,7412065</b> | 1762 | 2470 | <b>2116</b>   |
| ADAMTS5 | -1,336033 | -0,146232 | <b>-0,7411325</b> | 1068 | 2047 | <b>1557,5</b> |
| GUK1    | -0,81146  | -0,669808 | <b>-0,740634</b>  | 2009 | 2160 | <b>2084,5</b> |
| OR4D5   | -1,503334 | 0,02232   | <b>-0,740507</b>  | 1544 | 1517 | <b>1530,5</b> |
| DEDD2   | -0,740446 | NaN       | <b>-0,740446</b>  | 1693 | NaN  | <b>1693</b>   |
| MS4A14  | -0,882449 | -0,59815  | <b>-0,7402995</b> | 1543 | 2125 | <b>1834</b>   |
| DUSP18  | -0,638742 | -0,841519 | <b>-0,7401305</b> | 1585 | 2221 | <b>1903</b>   |
| EBLN2   | -0,662662 | -0,817081 | <b>-0,7398715</b> | 1108 | 1843 | <b>1475,5</b> |
| GNRH2   | -0,992104 | -0,486986 | <b>-0,739545</b>  | 1486 | 2055 | <b>1770,5</b> |
| PIK3R1  | -0,819666 | -0,659027 | <b>-0,7393465</b> | 1793 | 2219 | <b>2006</b>   |
| DNAH7   | 0,271436  | -1,749621 | <b>-0,7390925</b> | 1441 | 2215 | <b>1828</b>   |
| PAX9    | -1,079489 | -0,398618 | <b>-0,7390535</b> | 1409 | 1945 | <b>1677</b>   |
| POLE4   | -0,923356 | -0,554473 | <b>-0,7389145</b> | 1055 | 1351 | <b>1203</b>   |
| ITGA4   | -0,636401 | -0,841404 | <b>-0,7389025</b> | 1921 | 2048 | <b>1984,5</b> |

|           |           |           |                   |      |      |               |
|-----------|-----------|-----------|-------------------|------|------|---------------|
| RIOK1     | -0,823582 | -0,653117 | <b>-0,7383495</b> | 2053 | 2105 | <b>2079</b>   |
| LINC00336 | -0,400212 | -1,076362 | <b>-0,738287</b>  | 1304 | 1889 | <b>1596,5</b> |
| TMC2      | 0,020144  | -1,49631  | <b>-0,738083</b>  | 1308 | 2043 | <b>1675,5</b> |
| DNAL4     | -0,334065 | -1,141205 | <b>-0,737635</b>  | 1460 | 2267 | <b>1863,5</b> |
| TRAT1     | -0,804862 | -0,670227 | <b>-0,7375445</b> | 1559 | 1554 | <b>1556,5</b> |
| IL17A     | -0,73735  | NaN       | <b>-0,73735</b>   | 1613 | NaN  | <b>1613</b>   |
| CRP       | -0,737345 | NaN       | <b>-0,737345</b>  | 1818 | NaN  | <b>1818</b>   |
| SF3B1     | -1,744114 | 0,269652  | <b>-0,737231</b>  | 661  | 710  | <b>685,5</b>  |
| TATDN1    | -1,410891 | -0,062587 | <b>-0,736739</b>  | 1439 | 2100 | <b>1769,5</b> |
| MID2      | -0,76482  | -0,708376 | <b>-0,736598</b>  | 1845 | 2203 | <b>2024</b>   |
| KRTAP25-1 | -0,155158 | -1,317443 | <b>-0,7363005</b> | 1333 | 2393 | <b>1863</b>   |
| PLIN1     | -0,571558 | -0,900975 | <b>-0,7362665</b> | 1798 | 2051 | <b>1924,5</b> |
| LRRC33    | -0,519599 | -0,952344 | <b>-0,7359715</b> | 1643 | 1989 | <b>1816</b>   |
| ALG5      | -1,131355 | -0,340553 | <b>-0,735954</b>  | 1971 | 2889 | <b>2430</b>   |
| FMNL3     | -1,420488 | -0,050866 | <b>-0,735677</b>  | 1547 | 1331 | <b>1439</b>   |
| CDADC1    | -1,191558 | -0,279667 | <b>-0,7356125</b> | 2252 | 2318 | <b>2285</b>   |
| SLC38A10  | -0,221483 | -1,248942 | <b>-0,7352125</b> | 1295 | 1739 | <b>1517</b>   |
| RTKN2     | -1,121397 | -0,349025 | <b>-0,735211</b>  | 1732 | 2154 | <b>1943</b>   |
| SLCO1B3   | -0,346128 | -1,123554 | <b>-0,734841</b>  | 1311 | 2023 | <b>1667</b>   |
| TMEM106B  | -1,27389  | -0,194951 | <b>-0,7344205</b> | 1499 | 2182 | <b>1840,5</b> |
| PHF23     | -0,617412 | -0,851043 | <b>-0,7342275</b> | 1398 | 2041 | <b>1719,5</b> |
| SNED1     | -0,734173 | NaN       | <b>-0,734173</b>  | 1388 | NaN  | <b>1388</b>   |
| ATL3      | -0,982158 | -0,48574  | <b>-0,733949</b>  | 1567 | 2255 | <b>1911</b>   |
| ZNF813    | -0,867611 | -0,600251 | <b>-0,733931</b>  | 1921 | 3019 | <b>2470</b>   |
| TROAP     | -0,853303 | -0,614211 | <b>-0,733757</b>  | 964  | 1999 | <b>1481,5</b> |
| SLTM      | -1,004697 | -0,462702 | <b>-0,7336995</b> | 1479 | 1612 | <b>1545,5</b> |
| RHBDD2    | -0,891339 | -0,575019 | <b>-0,733179</b>  | 1795 | 2410 | <b>2102,5</b> |
| ZNF713    | -0,516104 | -0,949842 | <b>-0,732973</b>  | 1216 | 2182 | <b>1699</b>   |
| SDC3      | -0,299647 | -1,165991 | <b>-0,732819</b>  | 1204 | 2357 | <b>1780,5</b> |
| GSTO2     | -2,565875 | 1,100499  | <b>-0,732688</b>  | 1753 | 2018 | <b>1885,5</b> |
| CACNA1G   | -1,015649 | -0,449625 | <b>-0,732637</b>  | 1897 | 2335 | <b>2116</b>   |
| PRSS2     | -1,185751 | -0,27897  | <b>-0,7323605</b> | 1507 | 2270 | <b>1888,5</b> |
| KIAA1524  | -1,755082 | 0,290513  | <b>-0,7322845</b> | 1590 | 1782 | <b>1686</b>   |
| PKIG      | -0,50651  | -0,957581 | <b>-0,7320455</b> | 1923 | 2860 | <b>2391,5</b> |

|          |           |           |                   |      |      |               |
|----------|-----------|-----------|-------------------|------|------|---------------|
| MLLT1    | -0,539331 | -0,924547 | <b>-0,731939</b>  | 910  | 1275 | <b>1092,5</b> |
| MTERF    | -1,290441 | -0,173202 | <b>-0,7318215</b> | 1810 | 2018 | <b>1914</b>   |
| SPOCD1   | -0,731487 | NaN       | <b>-0,731487</b>  | 1952 | NaN  | <b>1952</b>   |
| ZNF630   | -0,525651 | -0,936808 | <b>-0,7312295</b> | 1832 | 1795 | <b>1813,5</b> |
| DTX1     | -0,992638 | -0,468588 | <b>-0,730613</b>  | 1731 | 2144 | <b>1937,5</b> |
| SSBP2    | -0,851959 | -0,609239 | <b>-0,730599</b>  | 1171 | 1869 | <b>1520</b>   |
| NADK     | -0,863258 | -0,59748  | <b>-0,730369</b>  | 1936 | 2009 | <b>1972,5</b> |
| ADAM32   | -0,768134 | -0,692019 | <b>-0,7300765</b> | 1281 | 2150 | <b>1715,5</b> |
| MTM1     | 0,717058  | -2,177161 | <b>-0,7300515</b> | 1683 | 2401 | <b>2042</b>   |
| LMOD1    | -1,474854 | 0,014828  | <b>-0,730013</b>  | 1151 | 1731 | <b>1441</b>   |
| DNAH8    | -0,88774  | -0,571759 | <b>-0,7297495</b> | 1599 | 1881 | <b>1740</b>   |
| KLHL11   | -1,222321 | -0,235111 | <b>-0,728716</b>  | 1902 | 1790 | <b>1846</b>   |
| HOOK3    | -0,712967 | -0,744219 | <b>-0,728593</b>  | 1321 | 1868 | <b>1594,5</b> |
| PPP2R2A  | -0,256796 | -1,200234 | <b>-0,728515</b>  | 1387 | 2165 | <b>1776</b>   |
| KRT80    | -0,728492 | NaN       | <b>-0,728492</b>  | 1820 | NaN  | <b>1820</b>   |
| ZNF565   | -0,72803  | NaN       | <b>-0,72803</b>   | 1953 | NaN  | <b>1953</b>   |
| C9orf91  | -0,935373 | -0,520358 | <b>-0,7278655</b> | 1226 | 1243 | <b>1234,5</b> |
| PGLYRP1  | -0,467981 | -0,987545 | <b>-0,727763</b>  | 1118 | 2572 | <b>1845</b>   |
| MRPL20   | -0,72762  | NaN       | <b>-0,72762</b>   | 1916 | NaN  | <b>1916</b>   |
| CRADD    | -1,083417 | -0,371208 | <b>-0,7273125</b> | 2379 | 2333 | <b>2356</b>   |
| GPR1     | -0,727105 | NaN       | <b>-0,727105</b>  | 1829 | NaN  | <b>1829</b>   |
| TIMM44   | -0,686147 | -0,767882 | <b>-0,7270145</b> | 1363 | 1077 | <b>1220</b>   |
| HDHD2    | -0,931    | -0,522863 | <b>-0,7269315</b> | 1605 | 2048 | <b>1826,5</b> |
| CDC26    | -0,726546 | NaN       | <b>-0,726546</b>  | 1548 | NaN  | <b>1548</b>   |
| COL13A1  | -0,956851 | -0,495705 | <b>-0,726278</b>  | 1695 | 1745 | <b>1720</b>   |
| LMAN2L   | -0,478266 | -0,974    | <b>-0,726133</b>  | 1570 | 1768 | <b>1669</b>   |
| DNAH2    | -0,726049 | NaN       | <b>-0,726049</b>  | 1952 | NaN  | <b>1952</b>   |
| SELS     | -0,794812 | -0,656828 | <b>-0,72582</b>   | 1693 | 1703 | <b>1698</b>   |
| TMEM208  | -1,989808 | 0,538667  | <b>-0,7255705</b> | 1383 | 1647 | <b>1515</b>   |
| KCNF1    | -0,640384 | -0,810756 | <b>-0,72557</b>   | 1762 | 2929 | <b>2345,5</b> |
| DMXL1    | -0,548448 | -0,90249  | <b>-0,725469</b>  | 1095 | 1027 | <b>1061</b>   |
| KIAA0556 | -0,856305 | -0,59452  | <b>-0,7254125</b> | 1810 | 1858 | <b>1834</b>   |
| RAC1     | -0,664758 | -0,785831 | <b>-0,7252945</b> | 1557 | 2117 | <b>1837</b>   |
| UBTD1    | -0,72507  | NaN       | <b>-0,72507</b>   | 1680 | NaN  | <b>1680</b>   |

|           |           |           |                   |      |      |               |
|-----------|-----------|-----------|-------------------|------|------|---------------|
| DTX3      | -0,697902 | -0,75194  | <b>-0,724921</b>  | 1040 | 1458 | <b>1249</b>   |
| TNS3      | -0,546322 | -0,903367 | <b>-0,7248445</b> | 1197 | 2051 | <b>1624</b>   |
| FGF2      | NaN       | -0,72452  | <b>-0,72452</b>   | NaN  | 1748 | <b>1748</b>   |
| GPX7      | -0,825449 | -0,623554 | <b>-0,7245015</b> | 1582 | 2522 | <b>2052</b>   |
| PMP2      | -1,009401 | -0,438668 | <b>-0,7240345</b> | 1359 | 2010 | <b>1684,5</b> |
| OR4S1     | -1,001558 | -0,4462   | <b>-0,723879</b>  | 1735 | 2479 | <b>2107</b>   |
| ZNF554    | -0,93551  | -0,511822 | <b>-0,723666</b>  | 1668 | 2132 | <b>1900</b>   |
| ATP6V1D   | -0,84763  | -0,599127 | <b>-0,7233785</b> | 1558 | 2452 | <b>2005</b>   |
| PGAP1     | -0,822544 | -0,62405  | <b>-0,723297</b>  | 1804 | 1761 | <b>1782,5</b> |
| PIAS3     | -1,593213 | 0,147392  | <b>-0,7229105</b> | 1517 | 2152 | <b>1834,5</b> |
| ZNF8      | -1,056301 | -0,389325 | <b>-0,722813</b>  | 1442 | 2438 | <b>1940</b>   |
| NQO2      | -0,748455 | -0,69629  | <b>-0,7223725</b> | 1271 | 1698 | <b>1484,5</b> |
| ENAM      | -1,078375 | -0,366099 | <b>-0,722237</b>  | 1828 | 1809 | <b>1818,5</b> |
| KAT7      | -0,687676 | -0,756482 | <b>-0,722079</b>  | 1513 | 1874 | <b>1693,5</b> |
| ASZ1      | -0,721828 | NaN       | <b>-0,721828</b>  | 1923 | NaN  | <b>1923</b>   |
| KRTAP20-3 | -0,222342 | -1,221219 | <b>-0,7217805</b> | 1825 | 2301 | <b>2063</b>   |
| CLIP3     | -1,116627 | -0,326894 | <b>-0,7217605</b> | 1462 | 1484 | <b>1473</b>   |
| EFHB      | -0,721593 | NaN       | <b>-0,721593</b>  | 1111 | NaN  | <b>1111</b>   |
| ZFX       | -1,427288 | -0,015741 | <b>-0,7215145</b> | 1509 | 1792 | <b>1650,5</b> |
| GABRR2    | -0,361244 | -1,081694 | <b>-0,721469</b>  | 1890 | 3126 | <b>2508</b>   |
| ABHD14A   | NaN       | -0,721359 | <b>-0,721359</b>  | NaN  | 2783 | <b>2783</b>   |
| HGC6.3    | -0,721231 | NaN       | <b>-0,721231</b>  | 1461 | NaN  | <b>1461</b>   |
| CIB2      | -1,381575 | -0,060729 | <b>-0,721152</b>  | 556  | 1603 | <b>1079,5</b> |
| PABPC1    | -0,89568  | -0,54643  | <b>-0,721055</b>  | 1305 | 1815 | <b>1560</b>   |
| PRF1      | -0,720743 | NaN       | <b>-0,720743</b>  | 1843 | NaN  | <b>1843</b>   |
| PRNT      | -0,004134 | -1,436516 | <b>-0,720325</b>  | 2196 | 2546 | <b>2371</b>   |
| GDF10     | -0,261741 | -1,178888 | <b>-0,7203145</b> | 1530 | 2267 | <b>1898,5</b> |
| O3FAR1    | -0,720297 | NaN       | <b>-0,720297</b>  | 1613 | NaN  | <b>1613</b>   |
| DOCK8     | -0,720143 | NaN       | <b>-0,720143</b>  | 1071 | NaN  | <b>1071</b>   |
| CYTH2     | -0,685951 | -0,754303 | <b>-0,720127</b>  | 1887 | 2163 | <b>2025</b>   |
| MTSS1L    | -0,750462 | -0,689377 | <b>-0,7199195</b> | 1184 | 1638 | <b>1411</b>   |
| SLC13A5   | -0,931142 | -0,508478 | <b>-0,71981</b>   | 694  | 1208 | <b>951</b>    |
| TGFB111   | -0,597163 | -0,842104 | <b>-0,7196335</b> | 1673 | 2867 | <b>2270</b>   |
| C9orf71   | -0,573807 | -0,864824 | <b>-0,7193155</b> | 1934 | 2356 | <b>2145</b>   |

|          |           |           |                   |      |      |               |
|----------|-----------|-----------|-------------------|------|------|---------------|
| KIF15    | -0,766668 | -0,671553 | <b>-0,7191105</b> | 1927 | 2314 | <b>2120,5</b> |
| CCDC103  | -1,030064 | -0,407622 | <b>-0,718843</b>  | 1502 | 1878 | <b>1690</b>   |
| SLC17A7  | -0,496666 | -0,940847 | <b>-0,7187565</b> | 1179 | 2015 | <b>1597</b>   |
| NUP98    | -1,003414 | -0,43409  | <b>-0,718752</b>  | 1474 | 1720 | <b>1597</b>   |
| RANBP3L  | -1,043082 | -0,394324 | <b>-0,718703</b>  | 1806 | 2463 | <b>2134,5</b> |
| SALL2    | -1,222143 | -0,21506  | <b>-0,7186015</b> | 1299 | 1680 | <b>1489,5</b> |
| ZNF493   | -0,987149 | -0,449948 | <b>-0,7185485</b> | 1819 | 2087 | <b>1953</b>   |
| MR1      | -0,837612 | -0,599273 | <b>-0,7184425</b> | 1732 | 2469 | <b>2100,5</b> |
| PF4      | -1,060602 | -0,375331 | <b>-0,7179665</b> | 1148 | 1194 | <b>1171</b>   |
| ARFRP1   | -1,050936 | -0,384124 | <b>-0,71753</b>   | 1714 | 2467 | <b>2090,5</b> |
| KCNJ15   | -1,332239 | -0,102028 | <b>-0,7171335</b> | 1820 | 2209 | <b>2014,5</b> |
| KCNGB1   | -0,743304 | -0,690206 | <b>-0,716755</b>  | 1468 | 2675 | <b>2071,5</b> |
| PSAP     | -0,515601 | -0,917572 | <b>-0,7165865</b> | 1529 | 1805 | <b>1667</b>   |
| LTK      | 0,961938  | -2,395045 | <b>-0,7165535</b> | 1769 | 2346 | <b>2057,5</b> |
| TMEM42   | -0,779733 | -0,652369 | <b>-0,716051</b>  | 2233 | 2234 | <b>2233,5</b> |
| IFNG     | -1,037316 | -0,39437  | <b>-0,715843</b>  | 1417 | 2136 | <b>1776,5</b> |
| SLC9A6   | -1,086115 | -0,345507 | <b>-0,715811</b>  | 1842 | 2824 | <b>2333</b>   |
| HBB      | -0,667797 | -0,763622 | <b>-0,7157095</b> | 1353 | 1837 | <b>1595</b>   |
| NUDT13   | -0,163823 | -1,267566 | <b>-0,7156945</b> | 2161 | 2446 | <b>2303,5</b> |
| MFSD1    | -0,714581 | NaN       | <b>-0,714581</b>  | 1052 | NaN  | <b>1052</b>   |
| IGFBP1   | -0,447401 | -0,981491 | <b>-0,714446</b>  | 1676 | 2069 | <b>1872,5</b> |
| CDK9     | -1,367522 | -0,061237 | <b>-0,7143795</b> | 1001 | 2028 | <b>1514,5</b> |
| NFATC4   | -0,638556 | -0,790177 | <b>-0,7143665</b> | 1584 | 2132 | <b>1858</b>   |
| BEND6    | -0,710969 | -0,717526 | <b>-0,7142475</b> | 1747 | 2265 | <b>2006</b>   |
| TBCEL    | -0,714058 | NaN       | <b>-0,714058</b>  | 1556 | NaN  | <b>1556</b>   |
| RBM44    | -1,161537 | -0,266568 | <b>-0,7140525</b> | 1492 | 1865 | <b>1678,5</b> |
| EDA2R    | -0,407951 | -1,019979 | <b>-0,713965</b>  | 1510 | 2289 | <b>1899,5</b> |
| TNFRSF1A | -0,283194 | -1,144211 | <b>-0,7137025</b> | 970  | 1847 | <b>1408,5</b> |
| RIC3     | -0,713674 | NaN       | <b>-0,713674</b>  | 2005 | NaN  | <b>2005</b>   |
| PKNOX2   | -1,284439 | -0,142801 | <b>-0,71362</b>   | 1363 | 2212 | <b>1787,5</b> |
| POLR1B   | -1,516546 | 0,089473  | <b>-0,7135365</b> | 1459 | 1717 | <b>1588</b>   |
| MTMR6    | -0,362661 | -1,063726 | <b>-0,7131935</b> | 1931 | 2480 | <b>2205,5</b> |
| RAB1B    | -1,01466  | -0,411597 | <b>-0,7131285</b> | 910  | 1408 | <b>1159</b>   |
| CREBBP   | -0,839868 | -0,585977 | <b>-0,7129225</b> | 1620 | 2210 | <b>1915</b>   |

|          |           |           |                   |      |      |               |
|----------|-----------|-----------|-------------------|------|------|---------------|
| OR10T2   | 0,09202   | -1,515452 | <b>-0,711716</b>  | 1568 | 1270 | <b>1419</b>   |
| GUCA1A   | -0,975307 | -0,447516 | <b>-0,7114115</b> | 1516 | 1627 | <b>1571,5</b> |
| UBE2Q1   | -0,713786 | -0,708919 | <b>-0,7113525</b> | 1958 | 2864 | <b>2411</b>   |
| KRTAP5-5 | -0,710917 | NaN       | <b>-0,710917</b>  | 717  | NaN  | <b>717</b>    |
| SMAD3    | -0,185234 | -1,23635  | <b>-0,710792</b>  | 1767 | 2969 | <b>2368</b>   |
| IGFBPL1  | -0,971895 | -0,449577 | <b>-0,710736</b>  | 1549 | 2509 | <b>2029</b>   |
| SIT1     | -0,43831  | -0,982531 | <b>-0,7104205</b> | 1921 | 2824 | <b>2372,5</b> |
| ZNF430   | -1,128573 | -0,291531 | <b>-0,710052</b>  | 1848 | 2052 | <b>1950</b>   |
| PRPF3    | -0,617428 | -0,8024   | <b>-0,709914</b>  | 1412 | 1642 | <b>1527</b>   |
| THBS4    | -0,5503   | -0,869394 | <b>-0,709847</b>  | 1541 | 2155 | <b>1848</b>   |
| PROL1    | -0,559767 | -0,859802 | <b>-0,7097845</b> | 1082 | 1475 | <b>1278,5</b> |
| DYNC11I2 | NaN       | -0,709596 | <b>-0,709596</b>  | NaN  | 2244 | <b>2244</b>   |
| ST7L     | -0,709245 | NaN       | <b>-0,709245</b>  | 1118 | NaN  | <b>1118</b>   |
| CROCC    | -0,703213 | -0,715165 | <b>-0,709189</b>  | 1859 | 2261 | <b>2060</b>   |
| STARD13  | -0,936056 | -0,482314 | <b>-0,709185</b>  | 925  | 1279 | <b>1102</b>   |
| NMBR     | -0,709173 | NaN       | <b>-0,709173</b>  | 1728 | NaN  | <b>1728</b>   |
| RNF215   | -1,161401 | -0,255474 | <b>-0,7084375</b> | 1405 | 2299 | <b>1852</b>   |
| ABL2     | -0,974246 | -0,44261  | <b>-0,708428</b>  | 1861 | 1607 | <b>1734</b>   |
| TRIM37   | -0,489864 | -0,926449 | <b>-0,7081565</b> | 2041 | 2575 | <b>2308</b>   |
| ADAMTSL3 | -0,551468 | -0,86471  | <b>-0,708089</b>  | 2356 | 2458 | <b>2407</b>   |
| WARS2    | -0,8456   | -0,570184 | <b>-0,707892</b>  | 1219 | 1695 | <b>1457</b>   |
| F11R     | -0,685911 | -0,729817 | <b>-0,707864</b>  | 1710 | 2199 | <b>1954,5</b> |
| FGA      | -1,448022 | 0,032294  | <b>-0,707864</b>  | 1268 | 2371 | <b>1819,5</b> |
| DYNLT3   | 0,118645  | -1,534264 | <b>-0,7078095</b> | 1699 | 2748 | <b>2223,5</b> |
| CTSA     | -1,212172 | -0,203179 | <b>-0,7076755</b> | 1071 | 2002 | <b>1536,5</b> |
| LMO1     | -0,833171 | -0,582007 | <b>-0,707589</b>  | 1797 | 2877 | <b>2337</b>   |
| TPSG1    | -0,35015  | -1,064852 | <b>-0,707501</b>  | 1223 | 1976 | <b>1599,5</b> |
| ST18     | -0,618804 | -0,796022 | <b>-0,707413</b>  | 1020 | 2251 | <b>1635,5</b> |
| SORBS1   | -1,412511 | -0,001736 | <b>-0,7071235</b> | 1763 | 2050 | <b>1906,5</b> |
| PTBP2    | -0,882059 | -0,53183  | <b>-0,7069445</b> | 1386 | 2161 | <b>1773,5</b> |
| PEX13    | -0,597066 | -0,816519 | <b>-0,7067925</b> | 976  | 1427 | <b>1201,5</b> |
| OR4D1    | -1,159392 | -0,254191 | <b>-0,7067915</b> | 2159 | 2113 | <b>2136</b>   |
| CRX      | -1,096096 | -0,317198 | <b>-0,706647</b>  | 1452 | 1887 | <b>1669,5</b> |
| FZD6     | -0,706554 | NaN       | <b>-0,706554</b>  | 1608 | NaN  | <b>1608</b>   |

|          |           |           |                   |      |      |               |
|----------|-----------|-----------|-------------------|------|------|---------------|
| KIF18B   | -0,706085 | NaN       | <b>-0,706085</b>  | 1702 | NaN  | <b>1702</b>   |
| C4orf40  | -0,645466 | -0,765904 | <b>-0,705685</b>  | 1832 | 2925 | <b>2378,5</b> |
| PLCZ1    | -0,66233  | -0,74869  | <b>-0,70551</b>   | 1778 | 2864 | <b>2321</b>   |
| HPCA     | -0,705148 | NaN       | <b>-0,705148</b>  | 1146 | NaN  | <b>1146</b>   |
| OR5H6    | -1,462335 | 0,052322  | <b>-0,7050065</b> | 2023 | 2680 | <b>2351,5</b> |
| NANOS1   | -0,811392 | -0,59767  | <b>-0,704531</b>  | 1432 | 1877 | <b>1654,5</b> |
| SESN1    | -1,12935  | -0,279705 | <b>-0,7045275</b> | 1450 | 2163 | <b>1806,5</b> |
| TIGD3    | -0,704061 | NaN       | <b>-0,704061</b>  | 1539 | NaN  | <b>1539</b>   |
| PARP11   | -0,010675 | -1,39682  | <b>-0,7037475</b> | 1620 | 2240 | <b>1930</b>   |
| UNK      | -0,57482  | -0,832466 | <b>-0,703643</b>  | 1352 | 1403 | <b>1377,5</b> |
| OAZ2     | -0,669673 | -0,736961 | <b>-0,703317</b>  | 1132 | 1865 | <b>1498,5</b> |
| C15orf27 | -0,703307 | NaN       | <b>-0,703307</b>  | 1833 | NaN  | <b>1833</b>   |
| KRTAP3-3 | -0,787488 | -0,618667 | <b>-0,7030775</b> | 1708 | 2220 | <b>1964</b>   |
| SPATA7   | -0,703066 | NaN       | <b>-0,703066</b>  | 1458 | NaN  | <b>1458</b>   |
| ARSB     | -0,726082 | -0,679842 | <b>-0,702962</b>  | 1181 | 1780 | <b>1480,5</b> |
| USH1C    | -0,563547 | -0,841572 | <b>-0,7025595</b> | 1791 | 2375 | <b>2083</b>   |
| KRTAP6-3 | 0,076783  | -1,481877 | <b>-0,702547</b>  | 1741 | 2313 | <b>2027</b>   |
| TMED2    | -0,702396 | NaN       | <b>-0,702396</b>  | 909  | NaN  | <b>909</b>    |
| ZBTB10   | -0,668731 | -0,73525  | <b>-0,7019905</b> | 1541 | 2070 | <b>1805,5</b> |
| HOOK2    | -0,400643 | -1,002782 | <b>-0,7017125</b> | 1876 | 1886 | <b>1881</b>   |
| ABCB7    | -0,46912  | -0,934261 | <b>-0,7016905</b> | 1794 | 2715 | <b>2254,5</b> |
| AVEN     | -0,741837 | -0,661193 | <b>-0,701515</b>  | 1687 | 2586 | <b>2136,5</b> |
| KIAA1755 | -0,743497 | -0,65929  | <b>-0,7013935</b> | 1857 | 2054 | <b>1955,5</b> |
| PITX3    | 0,927137  | -2,328633 | <b>-0,700748</b>  | 1177 | 1851 | <b>1514</b>   |
| NFU1     | -0,7045   | -0,69662  | <b>-0,70056</b>   | 1409 | 1644 | <b>1526,5</b> |
| FAM71F1  | 0,134241  | -1,535254 | <b>-0,7005065</b> | 1848 | 2761 | <b>2304,5</b> |
| GAPVD1   | -0,979061 | -0,421531 | <b>-0,700296</b>  | 1944 | 1809 | <b>1876,5</b> |
| OR2A12   | -0,969655 | -0,430714 | <b>-0,7001845</b> | 1766 | 1799 | <b>1782,5</b> |
| NKX3-1   | -0,114666 | -1,284732 | <b>-0,699699</b>  | 1682 | 2227 | <b>1954,5</b> |
| SLC22A6  | -0,757374 | -0,64079  | <b>-0,699082</b>  | 2045 | 2056 | <b>2050,5</b> |
| C9orf24  | -0,709266 | -0,688486 | <b>-0,698876</b>  | 1631 | 1882 | <b>1756,5</b> |
| CYP26B1  | -0,691311 | -0,706165 | <b>-0,698738</b>  | 1471 | 2093 | <b>1782</b>   |
| CHD8     | -0,6242   | -0,773155 | <b>-0,6986775</b> | 1448 | 1876 | <b>1662</b>   |
| RBFOX1   | -0,877103 | -0,520059 | <b>-0,698581</b>  | 2223 | 2161 | <b>2192</b>   |

|         |           |           |                   |      |      |               |
|---------|-----------|-----------|-------------------|------|------|---------------|
| AEBP2   | -1,065666 | -0,331006 | <b>-0,698336</b>  | 1658 | 2056 | <b>1857</b>   |
| FNDC5   | -1,184833 | -0,211812 | <b>-0,6983225</b> | 1692 | 1869 | <b>1780,5</b> |
| HSDL2   | -0,602077 | -0,794536 | <b>-0,6983065</b> | 756  | 1131 | <b>943,5</b>  |
| POLR2H  | -0,690043 | -0,706425 | <b>-0,698234</b>  | 927  | 1516 | <b>1221,5</b> |
| AIG1    | -1,167771 | -0,228209 | <b>-0,69799</b>   | 1365 | 1771 | <b>1568</b>   |
| RAB38   | -0,235802 | -1,159911 | <b>-0,6978565</b> | 1539 | 1874 | <b>1706,5</b> |
| OR10C1  | -0,345306 | -1,049848 | <b>-0,697577</b>  | 1431 | 1918 | <b>1674,5</b> |
| PIGG    | -0,697505 | NaN       | <b>-0,697505</b>  | 1438 | NaN  | <b>1438</b>   |
| CNTNAP5 | -0,865393 | -0,529607 | <b>-0,6975</b>    | 1878 | 1855 | <b>1866,5</b> |
| MMP1    | -1,491606 | 0,096736  | <b>-0,697435</b>  | 1077 | 1783 | <b>1430</b>   |
| CPNE5   | -1,309032 | -0,085415 | <b>-0,6972235</b> | 1253 | 1783 | <b>1518</b>   |
| TOX2    | -0,696383 | NaN       | <b>-0,696383</b>  | 1265 | NaN  | <b>1265</b>   |
| MPO     | -1,67283  | 0,280296  | <b>-0,696267</b>  | 1134 | 1404 | <b>1269</b>   |
| MS4A4A  | -0,895002 | -0,497116 | <b>-0,696059</b>  | 1698 | 2048 | <b>1873</b>   |
| CS      | -0,161881 | -1,229189 | <b>-0,695535</b>  | 1805 | 2265 | <b>2035</b>   |
| GLRX3   | -0,856722 | -0,533868 | <b>-0,695295</b>  | 1214 | 1738 | <b>1476</b>   |
| LCN2    | -1,384104 | -0,005538 | <b>-0,694821</b>  | 1563 | 2615 | <b>2089</b>   |
| RAI1    | -0,212135 | -1,177021 | <b>-0,694578</b>  | 1555 | 2225 | <b>1890</b>   |
| LAMTOR3 | -0,232888 | -1,15534  | <b>-0,694114</b>  | 1552 | 1515 | <b>1533,5</b> |
| GPR63   | -0,693643 | NaN       | <b>-0,693643</b>  | 1718 | NaN  | <b>1718</b>   |
| LHFPL5  | -1,279232 | -0,107234 | <b>-0,693233</b>  | 1451 | 1761 | <b>1606</b>   |
| SACM1L  | -0,356319 | -1,029594 | <b>-0,6929565</b> | 2251 | 2241 | <b>2246</b>   |
| LRRC67  | -1,029404 | -0,355596 | <b>-0,6925</b>    | 1827 | 2433 | <b>2130</b>   |
| DEK     | -1,070091 | -0,314907 | <b>-0,692499</b>  | 2129 | 2300 | <b>2214,5</b> |
| ACVR1B  | -1,571489 | 0,186826  | <b>-0,6923315</b> | 1701 | 1998 | <b>1849,5</b> |
| BTBD10  | -0,457647 | -0,926362 | <b>-0,6920045</b> | 1624 | 2863 | <b>2243,5</b> |
| CYP2C8  | NaN       | -0,691288 | <b>-0,691288</b>  | NaN  | 2317 | <b>2317</b>   |
| GRSF1   | -0,963598 | -0,418788 | <b>-0,691193</b>  | 1820 | 3218 | <b>2519</b>   |
| KIF5A   | -1,230878 | -0,151155 | <b>-0,6910165</b> | 1562 | 2180 | <b>1871</b>   |
| AMD1    | -0,279957 | -1,101632 | <b>-0,6907945</b> | 1315 | 1704 | <b>1509,5</b> |
| NDUFB1  | NaN       | -0,690542 | <b>-0,690542</b>  | NaN  | 2782 | <b>2782</b>   |
| HDGFRP3 | -0,624541 | -0,756181 | <b>-0,690361</b>  | 1468 | 1946 | <b>1707</b>   |
| RBP3    | -0,481742 | -0,898683 | <b>-0,6902125</b> | 1648 | 1957 | <b>1802,5</b> |
| TAF8    | -0,468261 | -0,911923 | <b>-0,690092</b>  | 1621 | 1689 | <b>1655</b>   |



|          |           |           |                   |      |      |               |
|----------|-----------|-----------|-------------------|------|------|---------------|
| CTSH     | -1,157956 | -0,222214 | <b>-0,690085</b>  | 1711 | 2284 | <b>1997,5</b> |
| SLC16A14 | -0,689681 | NaN       | <b>-0,689681</b>  | 1307 | NaN  | <b>1307</b>   |
| MYCT1    | -0,688433 | NaN       | <b>-0,688433</b>  | 1679 | NaN  | <b>1679</b>   |
| GRIK1    | -0,460369 | -0,915728 | <b>-0,6880485</b> | 1153 | 2072 | <b>1612,5</b> |
| SCAMP5   | -0,687908 | NaN       | <b>-0,687908</b>  | 1641 | NaN  | <b>1641</b>   |
| ANGEL1   | -0,687743 | NaN       | <b>-0,687743</b>  | 1540 | NaN  | <b>1540</b>   |
| CACNA2D4 | -0,687276 | NaN       | <b>-0,687276</b>  | 1473 | NaN  | <b>1473</b>   |
| TSHR     | -0,687259 | NaN       | <b>-0,687259</b>  | 2080 | NaN  | <b>2080</b>   |
| C22orf13 | 0,112808  | -1,486623 | <b>-0,6869075</b> | 1899 | 2439 | <b>2169</b>   |
| GPR87    | -0,686871 | NaN       | <b>-0,686871</b>  | 1791 | NaN  | <b>1791</b>   |
| DOK7     | -1,104789 | -0,268801 | <b>-0,686795</b>  | 2093 | 1919 | <b>2006</b>   |
| SYNGR4   | -0,514721 | -0,858654 | <b>-0,6866875</b> | 1243 | 1535 | <b>1389</b>   |
| HOXB8    | -0,686534 | NaN       | <b>-0,686534</b>  | 1316 | NaN  | <b>1316</b>   |
| CHRNB1   | -0,716321 | -0,656375 | <b>-0,686348</b>  | 1509 | 2454 | <b>1981,5</b> |
| PPIF     | 0,01385   | -1,386259 | <b>-0,6862045</b> | 2123 | 2433 | <b>2278</b>   |
| PCDHGA9  | -0,686194 | NaN       | <b>-0,686194</b>  | 1367 | NaN  | <b>1367</b>   |
| ASPHD2   | -0,213002 | -1,158906 | <b>-0,685954</b>  | 1274 | 2196 | <b>1735</b>   |
| GOLGA1   | -0,806875 | -0,56467  | <b>-0,6857725</b> | 1992 | 2252 | <b>2122</b>   |
| SGTB     | -1,112565 | -0,258643 | <b>-0,685604</b>  | 1695 | 1934 | <b>1814,5</b> |
| TLX1     | -0,050749 | -1,320322 | <b>-0,6855355</b> | 1437 | 2436 | <b>1936,5</b> |
| EXOSC1   | -0,685404 | NaN       | <b>-0,685404</b>  | 1499 | NaN  | <b>1499</b>   |
| TMIGD1   | -0,335164 | -1,035621 | <b>-0,6853925</b> | 1610 | 1798 | <b>1704</b>   |
| DGKK     | -0,518573 | -0,852032 | <b>-0,6853025</b> | 1756 | 2048 | <b>1902</b>   |
| MEGF11   | -0,351765 | -1,018548 | <b>-0,6851565</b> | 998  | 1624 | <b>1311</b>   |
| MORN5    | -0,564522 | -0,805661 | <b>-0,6850915</b> | 736  | 1939 | <b>1337,5</b> |
| MYBBP1A  | -0,277643 | -1,092275 | <b>-0,684959</b>  | 1395 | 1942 | <b>1668,5</b> |
| IGF1R    | -0,535642 | -0,83406  | <b>-0,684851</b>  | 1890 | 1940 | <b>1915</b>   |
| QTRTD1   | -0,684568 | NaN       | <b>-0,684568</b>  | 884  | NaN  | <b>884</b>    |
| GPN2     | -0,684391 | NaN       | <b>-0,684391</b>  | 1539 | NaN  | <b>1539</b>   |
| MRPL24   | -0,845315 | -0,522382 | <b>-0,6838485</b> | 1790 | 2916 | <b>2353</b>   |
| ARMC6    | -0,884778 | -0,482903 | <b>-0,6838405</b> | 1402 | 1746 | <b>1574</b>   |
| GLDC     | -1,181349 | -0,185982 | <b>-0,6836655</b> | 1924 | 2603 | <b>2263,5</b> |
| PCDH12   | -0,683317 | NaN       | <b>-0,683317</b>  | 1523 | NaN  | <b>1523</b>   |
| ZFP2     | -1,377135 | 0,011676  | <b>-0,6827295</b> | 1551 | 1981 | <b>1766</b>   |

|          |           |           |                   |      |      |               |
|----------|-----------|-----------|-------------------|------|------|---------------|
| GSTT1    | -0,124556 | -1,240894 | <b>-0,682725</b>  | 1696 | 2631 | <b>2163,5</b> |
| CLASRP   | -0,80972  | -0,555643 | <b>-0,6826815</b> | 1486 | 1981 | <b>1733,5</b> |
| DNAJC6   | -0,682562 | NaN       | <b>-0,682562</b>  | 1313 | NaN  | <b>1313</b>   |
| VPS35    | -0,058811 | -1,305833 | <b>-0,682322</b>  | 1614 | 2054 | <b>1834</b>   |
| C17orf64 | -0,627873 | -0,736739 | <b>-0,682306</b>  | 1335 | 2405 | <b>1870</b>   |
| C11orf35 | -0,682024 | NaN       | <b>-0,682024</b>  | 1198 | NaN  | <b>1198</b>   |
| ATP6V1B1 | -0,871268 | -0,492728 | <b>-0,681998</b>  | 933  | 1677 | <b>1305</b>   |
| TEAD2    | -0,867318 | -0,496349 | <b>-0,6818335</b> | 1476 | 1394 | <b>1435</b>   |
| 04-mars  | -0,383993 | -0,979069 | <b>-0,681531</b>  | 320  | 1024 | <b>672</b>    |
| KIF3A    | -0,077094 | -1,285432 | <b>-0,681263</b>  | 1292 | 1902 | <b>1597</b>   |
| USP32    | -0,369397 | -0,993017 | <b>-0,681207</b>  | 1162 | 1868 | <b>1515</b>   |
| PELI2    | -0,680913 | NaN       | <b>-0,680913</b>  | 1754 | NaN  | <b>1754</b>   |
| CEACAM1  | -1,246061 | -0,114797 | <b>-0,680429</b>  | 1573 | 2513 | <b>2043</b>   |
| WHAMM    | -0,915691 | -0,444983 | <b>-0,680337</b>  | 1087 | 1201 | <b>1144</b>   |
| RAB44    | -1,200738 | -0,159625 | <b>-0,6801815</b> | 1741 | 1577 | <b>1659</b>   |
| EHMT1    | -1,183726 | -0,176343 | <b>-0,6800345</b> | 1457 | 1644 | <b>1550,5</b> |
| NOTUM    | -0,679908 | NaN       | <b>-0,679908</b>  | 1766 | NaN  | <b>1766</b>   |
| BLVRA    | NaN       | -0,679834 | <b>-0,679834</b>  | NaN  | 2896 | <b>2896</b>   |
| MC5R     | -0,732129 | -0,626984 | <b>-0,6795565</b> | 1831 | 2338 | <b>2084,5</b> |
| ZFR2     | -0,714872 | -0,644042 | <b>-0,679457</b>  | 1588 | 1548 | <b>1568</b>   |
| PPEF2    | 0,462127  | -1,820677 | <b>-0,679275</b>  | 1618 | 1679 | <b>1648,5</b> |
| RORA     | -0,78515  | -0,573065 | <b>-0,6791075</b> | 1662 | 2072 | <b>1867</b>   |
| SRRM3    | -1,934637 | 0,576589  | <b>-0,679024</b>  | 1315 | 1880 | <b>1597,5</b> |
| ATPAF1   | -1,499375 | 0,141817  | <b>-0,678779</b>  | 2135 | 2371 | <b>2253</b>   |
| PCDHB3   | -0,678778 | NaN       | <b>-0,678778</b>  | 1570 | NaN  | <b>1570</b>   |
| MLF1     | -0,678568 | NaN       | <b>-0,678568</b>  | 1239 | NaN  | <b>1239</b>   |
| MS4A1    | 0,289331  | -1,64524  | <b>-0,6779545</b> | 1268 | 2299 | <b>1783,5</b> |
| HSPBAP1  | -0,677667 | NaN       | <b>-0,677667</b>  | 2325 | NaN  | <b>2325</b>   |
| VPS13D   | -0,362294 | -0,992183 | <b>-0,6772385</b> | 1682 | 1991 | <b>1836,5</b> |
| ACYP1    | -0,940718 | -0,413376 | <b>-0,677047</b>  | 1805 | 2706 | <b>2255,5</b> |
| CARD17   | -1,251153 | -0,102911 | <b>-0,677032</b>  | 1350 | 1541 | <b>1445,5</b> |
| CASKIN2  | -0,610168 | -0,743879 | <b>-0,6770235</b> | 1067 | 1615 | <b>1341</b>   |
| CD40LG   | -0,285033 | -1,069014 | <b>-0,6770235</b> | 1935 | 2159 | <b>2047</b>   |
| NUDT21   | -0,749267 | -0,604114 | <b>-0,6766905</b> | 2261 | 2722 | <b>2491,5</b> |

|          |           |           |                   |      |      |               |
|----------|-----------|-----------|-------------------|------|------|---------------|
| IARS2    | -1,094148 | -0,259011 | <b>-0,6765795</b> | 1824 | 1976 | <b>1900</b>   |
| ROBO2    | -0,818725 | -0,534301 | <b>-0,676513</b>  | 1819 | 2169 | <b>1994</b>   |
| RGS21    | -0,612981 | -0,739902 | <b>-0,6764415</b> | 2172 | 2361 | <b>2266,5</b> |
| KCNN2    | -0,985403 | -0,367011 | <b>-0,676207</b>  | 2028 | 3006 | <b>2517</b>   |
| ME1      | -0,901249 | -0,450607 | <b>-0,675928</b>  | 2222 | 2254 | <b>2238</b>   |
| ATG10    | -0,335101 | -1,016014 | <b>-0,6755575</b> | 1198 | 1551 | <b>1374,5</b> |
| SLCO3A1  | -0,62005  | -0,730848 | <b>-0,675449</b>  | 2024 | 2145 | <b>2084,5</b> |
| FAAH2    | -0,935056 | -0,415839 | <b>-0,6754475</b> | 2004 | 3385 | <b>2694,5</b> |
| C2CD2    | -1,549125 | 0,198282  | <b>-0,6754215</b> | 2243 | 1687 | <b>1965</b>   |
| CKS1B    | -0,143823 | -1,206385 | <b>-0,675104</b>  | 1814 | 1939 | <b>1876,5</b> |
| VAMP3    | -0,392552 | -0,957436 | <b>-0,674994</b>  | 1769 | 2358 | <b>2063,5</b> |
| APPL2    | -0,102917 | -1,245758 | <b>-0,6743375</b> | 1493 | 1715 | <b>1604</b>   |
| ZNF480   | -0,628174 | -0,719827 | <b>-0,6740005</b> | 1814 | 2568 | <b>2191</b>   |
| ACSF3    | -0,673439 | NaN       | <b>-0,673439</b>  | 976  | NaN  | <b>976</b>    |
| PROKR2   | -0,6734   | NaN       | <b>-0,6734</b>    | 659  | NaN  | <b>659</b>    |
| DOCK4    | -0,483707 | -0,863019 | <b>-0,673363</b>  | 1337 | 2409 | <b>1873</b>   |
| AGTR1    | -0,673146 | NaN       | <b>-0,673146</b>  | 1643 | NaN  | <b>1643</b>   |
| NAPEPLD  | -0,111089 | -1,235124 | <b>-0,6731065</b> | 1499 | 1796 | <b>1647,5</b> |
| TEX264   | -0,67308  | NaN       | <b>-0,67308</b>   | 1344 | NaN  | <b>1344</b>   |
| SETBP1   | -0,213688 | -1,131894 | <b>-0,672791</b>  | 1559 | 2169 | <b>1864</b>   |
| ACTC1    | -0,890829 | -0,454579 | <b>-0,672704</b>  | 1554 | 2173 | <b>1863,5</b> |
| ZAK      | -0,484469 | -0,860851 | <b>-0,67266</b>   | 1448 | 2359 | <b>1903,5</b> |
| ISL2     | 0,055332  | -1,400512 | <b>-0,67259</b>   | 1060 | 1496 | <b>1278</b>   |
| PCGF5    | -0,061143 | -1,283818 | <b>-0,6724805</b> | 1980 | 2579 | <b>2279,5</b> |
| STAC3    | -0,672425 | NaN       | <b>-0,672425</b>  | 1730 | NaN  | <b>1730</b>   |
| DNMT1    | -0,519351 | -0,824308 | <b>-0,6718295</b> | 1436 | 1952 | <b>1694</b>   |
| B4GALNT2 | -0,03092  | -1,312014 | <b>-0,671467</b>  | 1379 | 1827 | <b>1603</b>   |
| OSBPL3   | -0,80103  | -0,541875 | <b>-0,6714525</b> | 897  | 1651 | <b>1274</b>   |
| SEC24C   | -1,266701 | -0,076176 | <b>-0,6714385</b> | 1502 | 2100 | <b>1801</b>   |
| SLAMF7   | -0,953537 | -0,389321 | <b>-0,671429</b>  | 1984 | 2299 | <b>2141,5</b> |
| STX17    | -0,583537 | -0,759192 | <b>-0,6713645</b> | 1613 | 1952 | <b>1782,5</b> |
| MLPH     | -0,671319 | NaN       | <b>-0,671319</b>  | 1614 | NaN  | <b>1614</b>   |
| WDR60    | -0,671157 | NaN       | <b>-0,671157</b>  | 1375 | NaN  | <b>1375</b>   |
| SELP     | -0,670382 | NaN       | <b>-0,670382</b>  | 2587 | NaN  | <b>2587</b>   |

|          |           |           |                   |      |      |               |
|----------|-----------|-----------|-------------------|------|------|---------------|
| CLTA     | -0,551798 | -0,788115 | <b>-0,6699565</b> | 1462 | 2017 | <b>1739,5</b> |
| POU4F1   | -0,511595 | -0,828139 | <b>-0,669867</b>  | 1226 | 2201 | <b>1713,5</b> |
| OR4K1    | -1,570056 | 0,231226  | <b>-0,669415</b>  | 1839 | 2151 | <b>1995</b>   |
| SLC25A47 | -0,467808 | -0,870605 | <b>-0,6692065</b> | 1655 | 1291 | <b>1473</b>   |
| TLR3     | -0,393067 | -0,944967 | <b>-0,669017</b>  | 2239 | 2248 | <b>2243,5</b> |
| OIP5     | -0,668945 | NaN       | <b>-0,668945</b>  | 1588 | NaN  | <b>1588</b>   |
| MKS1     | -0,668631 | NaN       | <b>-0,668631</b>  | 1637 | NaN  | <b>1637</b>   |
| NAGK     | -0,826912 | -0,508861 | <b>-0,6678865</b> | 1703 | 1941 | <b>1822</b>   |
| EFNB2    | -1,421392 | 0,085768  | <b>-0,667812</b>  | 519  | 1034 | <b>776,5</b>  |
| C1orf168 | -0,667812 | NaN       | <b>-0,667812</b>  | 1440 | NaN  | <b>1440</b>   |
| SRPR     | -0,264326 | -1,070612 | <b>-0,667469</b>  | 1688 | 2112 | <b>1900</b>   |
| ZCCHC9   | 0,050094  | -1,384782 | <b>-0,667344</b>  | 899  | 2025 | <b>1462</b>   |
| EPOR     | -0,411292 | -0,923059 | <b>-0,6671755</b> | 1472 | 1739 | <b>1605,5</b> |
| ZNF256   | -0,343611 | -0,990043 | <b>-0,666827</b>  | 1998 | 2056 | <b>2027</b>   |
| LUC7L    | -0,666217 | NaN       | <b>-0,666217</b>  | 1518 | NaN  | <b>1518</b>   |
| TRIM4    | -0,778936 | -0,55308  | <b>-0,666008</b>  | 1975 | 3275 | <b>2625</b>   |
| KLF15    | -0,599873 | -0,731648 | <b>-0,6657605</b> | 1984 | 1621 | <b>1802,5</b> |
| TACC2    | -0,664887 | NaN       | <b>-0,664887</b>  | 1653 | NaN  | <b>1653</b>   |
| CXorf64  | -0,661839 | -0,667397 | <b>-0,664618</b>  | 1493 | 1493 | <b>1493</b>   |
| IL5      | -1,166389 | -0,162414 | <b>-0,6644015</b> | 1757 | 2147 | <b>1952</b>   |
| OR2AG2   | -0,082659 | -1,245961 | <b>-0,66431</b>   | 1588 | 2369 | <b>1978,5</b> |
| ARTN     | -1,089605 | -0,238995 | <b>-0,6643</b>    | 655  | 1558 | <b>1106,5</b> |
| DEFB115  | -0,662207 | -0,665709 | <b>-0,663958</b>  | 2166 | 1967 | <b>2066,5</b> |
| CDCP2    | -0,663892 | NaN       | <b>-0,663892</b>  | 1257 | NaN  | <b>1257</b>   |
| DYNLRB2  | -0,601047 | -0,726531 | <b>-0,663789</b>  | 1392 | 2213 | <b>1802,5</b> |
| ATP6V0D2 | -0,800314 | -0,527071 | <b>-0,6636925</b> | 1672 | 1994 | <b>1833</b>   |
| CDCA7L   | -1,048381 | -0,27898  | <b>-0,6636805</b> | 1764 | 2073 | <b>1918,5</b> |
| LPIN2    | -0,508292 | -0,819014 | <b>-0,663653</b>  | 2052 | 2118 | <b>2085</b>   |
| FILIP1L  | -0,688315 | -0,638711 | <b>-0,663513</b>  | 1036 | 1200 | <b>1118</b>   |
| NOL12    | -0,567518 | -0,758938 | <b>-0,663228</b>  | 1524 | 2280 | <b>1902</b>   |
| ANKRD11  | -0,11992  | -1,206122 | <b>-0,663021</b>  | 1411 | 2031 | <b>1721</b>   |
| PCSK5    | -0,173977 | -1,151731 | <b>-0,662854</b>  | 1399 | 2209 | <b>1804</b>   |
| NIN      | 0,412536  | -1,73765  | <b>-0,662557</b>  | 1564 | 1984 | <b>1774</b>   |
| NDUFA10  | -0,333039 | -0,991832 | <b>-0,6624355</b> | 1207 | 1984 | <b>1595,5</b> |

|          |           |           |                   |      |      |               |
|----------|-----------|-----------|-------------------|------|------|---------------|
| DSC2     | -1,057918 | -0,266895 | <b>-0,6624065</b> | 1919 | 2232 | <b>2075,5</b> |
| C1orf9   | -0,652479 | -0,672289 | <b>-0,662384</b>  | 1807 | 2056 | <b>1931,5</b> |
| TMEM52   | -0,661971 | NaN       | <b>-0,661971</b>  | 1555 | NaN  | <b>1555</b>   |
| SLC25A43 | -1,042915 | -0,280991 | <b>-0,661953</b>  | 329  | 1566 | <b>947,5</b>  |
| ZFHX3    | -0,767842 | -0,556009 | <b>-0,6619255</b> | 1440 | 2176 | <b>1808</b>   |
| PIP      | -0,318017 | -1,005491 | <b>-0,661754</b>  | 2035 | 1633 | <b>1834</b>   |
| GATAD1   | -0,931229 | -0,392135 | <b>-0,661682</b>  | 1804 | 1565 | <b>1684,5</b> |
| BSG      | -0,384063 | -0,939219 | <b>-0,661641</b>  | 1362 | 2168 | <b>1765</b>   |
| C9orf106 | -0,702819 | -0,620221 | <b>-0,66152</b>   | 1693 | 2474 | <b>2083,5</b> |
| SPTBN5   | 0,067338  | -1,390337 | <b>-0,6614995</b> | 1260 | 1560 | <b>1410</b>   |
| ASL      | -1,146952 | -0,176024 | <b>-0,661488</b>  | 1708 | 1587 | <b>1647,5</b> |
| NMUR1    | -0,661021 | NaN       | <b>-0,661021</b>  | 1877 | NaN  | <b>1877</b>   |
| ATP1A1   | -0,152326 | -1,16927  | <b>-0,660798</b>  | 1607 | 2069 | <b>1838</b>   |
| C9orf100 | -0,421948 | -0,899592 | <b>-0,66077</b>   | 1233 | 2345 | <b>1789</b>   |
| ACADVL   | -0,26169  | -1,05956  | <b>-0,660625</b>  | 1267 | 1433 | <b>1350</b>   |
| UQCR11   | -0,140207 | -1,180824 | <b>-0,6605155</b> | 2091 | 3004 | <b>2547,5</b> |
| GPR137   | -0,660461 | NaN       | <b>-0,660461</b>  | 1113 | NaN  | <b>1113</b>   |
| PIGK     | -0,461396 | -0,85905  | <b>-0,660223</b>  | 1723 | 2109 | <b>1916</b>   |
| PJA1     | 0,304122  | -1,624559 | <b>-0,6602185</b> | 1410 | 2378 | <b>1894</b>   |
| ATF6     | NaN       | -0,660001 | <b>-0,660001</b>  | NaN  | 2209 | <b>2209</b>   |
| TPTE     | -0,52261  | -0,797277 | <b>-0,6599435</b> | 1808 | 2615 | <b>2211,5</b> |
| ZFP42    | -0,659759 | NaN       | <b>-0,659759</b>  | 1874 | NaN  | <b>1874</b>   |
| ZNF467   | -0,724735 | -0,593962 | <b>-0,6593485</b> | 1922 | 1838 | <b>1880</b>   |
| NEUROG3  | -2,003529 | 0,685168  | <b>-0,6591805</b> | 1238 | 2203 | <b>1720,5</b> |
| P2RX3    | -0,714878 | -0,602354 | <b>-0,658616</b>  | 1764 | 2337 | <b>2050,5</b> |
| SMAGP    | -0,65833  | NaN       | <b>-0,65833</b>   | 1674 | NaN  | <b>1674</b>   |
| APOBEC2  | -0,731579 | -0,585002 | <b>-0,6582905</b> | 1357 | 1911 | <b>1634</b>   |
| AQP11    | -0,374871 | -0,941315 | <b>-0,658093</b>  | 1726 | 2060 | <b>1893</b>   |
| ALDH16A1 | -0,099712 | -1,216337 | <b>-0,6580245</b> | 1367 | 2234 | <b>1800,5</b> |
| NDUFB7   | -0,687015 | -0,628982 | <b>-0,6579985</b> | 1161 | 1330 | <b>1245,5</b> |
| COL16A1  | -0,653256 | -0,66182  | <b>-0,657538</b>  | 1657 | 2198 | <b>1927,5</b> |
| HOXD8    | -1,246532 | -0,068358 | <b>-0,657445</b>  | 1204 | 2588 | <b>1896</b>   |
| CCDC134  | -0,65703  | NaN       | <b>-0,65703</b>   | 1570 | NaN  | <b>1570</b>   |
| EIF2C3   | -1,123085 | -0,190949 | <b>-0,657017</b>  | 1430 | 2504 | <b>1967</b>   |

|          |           |           |                   |      |      |               |
|----------|-----------|-----------|-------------------|------|------|---------------|
| GZMH     | -0,18874  | -1,125056 | <b>-0,656898</b>  | 1842 | 1892 | <b>1867</b>   |
| FOXI2    | -0,958655 | -0,35507  | <b>-0,6568625</b> | 1184 | 1865 | <b>1524,5</b> |
| CRYAB    | -0,557378 | -0,756297 | <b>-0,6568375</b> | 1260 | 1592 | <b>1426</b>   |
| MSH4     | -0,520965 | -0,792475 | <b>-0,65672</b>   | 1906 | 2731 | <b>2318,5</b> |
| PIGV     | -0,580602 | -0,732686 | <b>-0,656644</b>  | 2226 | 1995 | <b>2110,5</b> |
| ZNF641   | -0,606966 | -0,704796 | <b>-0,655881</b>  | 1540 | 2000 | <b>1770</b>   |
| CIB4     | -0,797779 | -0,513081 | <b>-0,65543</b>   | 1797 | 2117 | <b>1957</b>   |
| CD2AP    | 0,189918  | -1,500482 | <b>-0,655282</b>  | 1391 | 1848 | <b>1619,5</b> |
| NRSN1    | -0,654721 | NaN       | <b>-0,654721</b>  | 1795 | NaN  | <b>1795</b>   |
| TIMD4    | -0,759588 | -0,549752 | <b>-0,65467</b>   | 1770 | 1849 | <b>1809,5</b> |
| SFN      | -0,895433 | -0,413719 | <b>-0,654576</b>  | 1218 | 1845 | <b>1531,5</b> |
| NCCRP1   | -0,628947 | -0,679961 | <b>-0,654454</b>  | 1480 | 2197 | <b>1838,5</b> |
| POP4     | -0,382265 | -0,926625 | <b>-0,654445</b>  | 1578 | 2294 | <b>1936</b>   |
| RSPH3    | -0,79893  | -0,509663 | <b>-0,6542965</b> | 1485 | 1451 | <b>1468</b>   |
| C20orf30 | -0,583164 | -0,725314 | <b>-0,654239</b>  | 974  | 1600 | <b>1287</b>   |
| SNAPC4   | -1,098393 | -0,209866 | <b>-0,6541295</b> | 1453 | 2546 | <b>1999,5</b> |
| MCM9     | 0,397268  | -1,705371 | <b>-0,6540515</b> | 1502 | 2452 | <b>1977</b>   |
| GFRA3    | -0,899597 | -0,408155 | <b>-0,653876</b>  | 1605 | 2159 | <b>1882</b>   |
| HACL1    | NaN       | -0,653747 | <b>-0,653747</b>  | NaN  | 2392 | <b>2392</b>   |
| STOML3   | -0,728407 | -0,578912 | <b>-0,6536595</b> | 1192 | 1313 | <b>1252,5</b> |
| NDUFA1   | -1,172802 | -0,134039 | <b>-0,6534205</b> | 2272 | 2559 | <b>2415,5</b> |
| ADCY8    | -1,218145 | -0,088299 | <b>-0,653222</b>  | 1513 | 1959 | <b>1736</b>   |
| STXBP2   | -0,465635 | -0,840675 | <b>-0,653155</b>  | 1658 | 1964 | <b>1811</b>   |
| HPDL     | -0,653154 | NaN       | <b>-0,653154</b>  | 1388 | NaN  | <b>1388</b>   |
| CDK17    | -0,969353 | -0,33596  | <b>-0,6526565</b> | 1991 | 2383 | <b>2187</b>   |
| NGEF     | -0,652493 | NaN       | <b>-0,652493</b>  | 1261 | NaN  | <b>1261</b>   |
| DLK2     | -0,445117 | -0,85955  | <b>-0,6523335</b> | 1831 | 2758 | <b>2294,5</b> |
| CNTN3    | -1,148313 | -0,156156 | <b>-0,6522345</b> | 1574 | 1327 | <b>1450,5</b> |
| DSEL     | -0,748099 | -0,556368 | <b>-0,6522335</b> | 1964 | 3017 | <b>2490,5</b> |
| TCF7L2   | -1,86012  | 0,555809  | <b>-0,6521555</b> | 1673 | 2144 | <b>1908,5</b> |
| RNASE1   | -1,229478 | -0,074601 | <b>-0,6520395</b> | 1619 | 2132 | <b>1875,5</b> |
| CLIC1    | -0,287046 | -1,016892 | <b>-0,651969</b>  | 1461 | 2234 | <b>1847,5</b> |
| VPREB3   | -0,419113 | -0,884686 | <b>-0,6518995</b> | 1896 | 1940 | <b>1918</b>   |
| C19orf54 | -1,570169 | 0,266841  | <b>-0,651664</b>  | 2057 | 2325 | <b>2191</b>   |

|          |           |           |                   |      |      |               |
|----------|-----------|-----------|-------------------|------|------|---------------|
| CASC1    | -0,911626 | -0,391067 | <b>-0,6513465</b> | 1747 | 1906 | <b>1826,5</b> |
| MAGEA8   | -1,713811 | 0,411436  | <b>-0,6511875</b> | 1632 | 1961 | <b>1796,5</b> |
| BARX1    | -0,70225  | -0,59986  | <b>-0,651055</b>  | 1339 | 1705 | <b>1522</b>   |
| CDR2     | -0,808859 | -0,492982 | <b>-0,6509205</b> | 1054 | 1519 | <b>1286,5</b> |
| PAX2     | -1,456232 | 0,154891  | <b>-0,6506705</b> | 1614 | 2149 | <b>1881,5</b> |
| SLC22A12 | -0,737969 | -0,56336  | <b>-0,6506645</b> | 1453 | 2572 | <b>2012,5</b> |
| C19orf24 | -0,627847 | -0,673058 | <b>-0,6504525</b> | 1703 | 1891 | <b>1797</b>   |
| DMRT1    | -0,543901 | -0,756511 | <b>-0,650206</b>  | 1437 | 1995 | <b>1716</b>   |
| DDX58    | -1,621617 | 0,321468  | <b>-0,6500745</b> | 2089 | 2995 | <b>2542</b>   |
| EHD3     | -1,165274 | -0,134727 | <b>-0,6500005</b> | 1645 | 2620 | <b>2132,5</b> |
| PSMG3    | -0,649986 | NaN       | <b>-0,649986</b>  | 1187 | NaN  | <b>1187</b>   |
| HSPA5    | 0,168805  | -1,468138 | <b>-0,6496665</b> | 1095 | 1789 | <b>1442</b>   |
| FAM19A5  | -0,125618 | -1,173616 | <b>-0,649617</b>  | 1619 | 2396 | <b>2007,5</b> |
| FAM150B  | -0,294258 | -1,004406 | <b>-0,649332</b>  | 1594 | 2054 | <b>1824</b>   |
| GUF1     | -0,818906 | -0,478477 | <b>-0,6486915</b> | 2000 | 2697 | <b>2348,5</b> |
| DRD5     | -0,6486   | NaN       | <b>-0,6486</b>    | 1156 | NaN  | <b>1156</b>   |
| AIPL1    | -0,695978 | -0,600409 | <b>-0,6481935</b> | 1679 | 2304 | <b>1991,5</b> |
| SMARCC2  | NaN       | -0,647792 | <b>-0,647792</b>  | NaN  | 2109 | <b>2109</b>   |
| CRB3     | -0,647776 | NaN       | <b>-0,647776</b>  | 1099 | NaN  | <b>1099</b>   |
| XKR5     | -0,986995 | -0,308265 | <b>-0,64763</b>   | 1521 | 1656 | <b>1588,5</b> |
| EFNB1    | -0,644167 | -0,651083 | <b>-0,647625</b>  | 1472 | 1912 | <b>1692</b>   |
| ATOH7    | -1,229142 | -0,065943 | <b>-0,6475425</b> | 1523 | 1637 | <b>1580</b>   |
| EML2     | -0,89209  | -0,402718 | <b>-0,647404</b>  | 2120 | 2030 | <b>2075</b>   |
| RPP25    | -0,731397 | -0,562513 | <b>-0,646955</b>  | 1023 | 1110 | <b>1066,5</b> |
| EGR1     | -0,981422 | -0,312434 | <b>-0,646928</b>  | 1599 | 1932 | <b>1765,5</b> |
| NEU4     | -0,693884 | -0,598875 | <b>-0,6463795</b> | 1365 | 2056 | <b>1710,5</b> |
| DHH      | -0,430413 | -0,862057 | <b>-0,646235</b>  | 2029 | 2176 | <b>2102,5</b> |
| LZTS2    | -0,637683 | -0,654625 | <b>-0,646154</b>  | 2115 | 2113 | <b>2114</b>   |
| PLCG1    | -1,569294 | 0,277569  | <b>-0,6458625</b> | 1616 | 2165 | <b>1890,5</b> |
| WFDC9    | 0,081213  | -1,372776 | <b>-0,6457815</b> | 2210 | 1938 | <b>2074</b>   |
| THUMPD2  | -1,153845 | -0,137693 | <b>-0,645769</b>  | 1955 | 2143 | <b>2049</b>   |
| COTL1    | -1,45849  | 0,167097  | <b>-0,6456965</b> | 1176 | 1612 | <b>1394</b>   |
| RNASEH2C | -0,583576 | -0,70774  | <b>-0,645658</b>  | 1833 | 2068 | <b>1950,5</b> |
| GPR162   | -0,645466 | NaN       | <b>-0,645466</b>  | 1556 | NaN  | <b>1556</b>   |

|          |           |           |                   |      |      |               |
|----------|-----------|-----------|-------------------|------|------|---------------|
| GGA1     | -0,673558 | -0,617051 | <b>-0,6453045</b> | 1098 | 2263 | <b>1680,5</b> |
| ALOXE3   | -0,699678 | -0,59056  | <b>-0,645119</b>  | 943  | 1886 | <b>1414,5</b> |
| LZTFL1   | -0,142963 | -1,147212 | <b>-0,6450875</b> | 2105 | 1950 | <b>2027,5</b> |
| SPTLC2   | -0,208364 | -1,081337 | <b>-0,6448505</b> | 1098 | 1870 | <b>1484</b>   |
| C19orf28 | -0,644798 | NaN       | <b>-0,644798</b>  | 1285 | NaN  | <b>1285</b>   |
| RBM5     | 0,441366  | -1,730494 | <b>-0,644564</b>  | 1582 | 2082 | <b>1832</b>   |
| ZNF215   | -1,005196 | -0,283802 | <b>-0,644499</b>  | 1346 | 1939 | <b>1642,5</b> |
| TMEM2    | -0,594747 | -0,693964 | <b>-0,6443555</b> | 1261 | 1879 | <b>1570</b>   |
| PRRC2C   | -1,32748  | 0,039206  | <b>-0,644137</b>  | 1612 | 1753 | <b>1682,5</b> |
| DRAM2    | -0,643925 | NaN       | <b>-0,643925</b>  | 1224 | NaN  | <b>1224</b>   |
| BAHCC1   | -0,670317 | -0,616343 | <b>-0,64333</b>   | 1334 | 1588 | <b>1461</b>   |
| C1orf159 | -0,643039 | NaN       | <b>-0,643039</b>  | 1437 | NaN  | <b>1437</b>   |
| PNLDC1   | -0,12517  | -1,160423 | <b>-0,6427965</b> | 1545 | 1698 | <b>1621,5</b> |
| RNF151   | -0,715904 | -0,569663 | <b>-0,6427835</b> | 1239 | 1968 | <b>1603,5</b> |
| PMP22    | -0,970129 | -0,314972 | <b>-0,6425505</b> | 1677 | 1946 | <b>1811,5</b> |
| XPA      | -0,656275 | -0,628521 | <b>-0,642398</b>  | 1581 | 2605 | <b>2093</b>   |
| CSMD3    | -1,350185 | 0,065649  | <b>-0,642268</b>  | 1653 | 1717 | <b>1685</b>   |
| WDR88    | -0,739078 | -0,545135 | <b>-0,6421065</b> | 1144 | 1400 | <b>1272</b>   |
| PTPRN2   | -0,281823 | -1,00213  | <b>-0,6419765</b> | 1680 | 2295 | <b>1987,5</b> |
| MARCO    | -0,861154 | -0,422725 | <b>-0,6419395</b> | 1587 | 1975 | <b>1781</b>   |
| PUS10    | -0,20162  | -1,081838 | <b>-0,641729</b>  | 1874 | 2918 | <b>2396</b>   |
| JOSD2    | -0,258534 | -1,024556 | <b>-0,641545</b>  | 1976 | 2278 | <b>2127</b>   |
| ALG14    | -0,02558  | -1,257423 | <b>-0,6415015</b> | 1686 | 2042 | <b>1864</b>   |
| SUCLA2   | -0,434826 | -0,847418 | <b>-0,641122</b>  | 1182 | 1790 | <b>1486</b>   |
| ANKS1B   | 0,019844  | -1,301713 | <b>-0,6409345</b> | 1483 | 1900 | <b>1691,5</b> |
| FBXL3    | -0,778044 | -0,503336 | <b>-0,64069</b>   | 2229 | 2423 | <b>2326</b>   |
| TTLL6    | -0,225249 | -1,054719 | <b>-0,639984</b>  | 1399 | 1839 | <b>1619</b>   |
| CBLB     | -0,850377 | -0,429544 | <b>-0,6399605</b> | 2032 | 3130 | <b>2581</b>   |
| FOLR1    | -0,586691 | -0,692853 | <b>-0,639772</b>  | 1636 | 2511 | <b>2073,5</b> |
| ARHGEF3  | -0,876224 | -0,403262 | <b>-0,639743</b>  | 1396 | 1734 | <b>1565</b>   |
| CBX6     | -0,639306 | NaN       | <b>-0,639306</b>  | 1390 | NaN  | <b>1390</b>   |
| GOLGA2P5 | -0,639056 | NaN       | <b>-0,639056</b>  | 1620 | NaN  | <b>1620</b>   |
| GCH1     | -0,179438 | -1,098547 | <b>-0,6389925</b> | 990  | 1322 | <b>1156</b>   |
| DNAJB5   | -1,183509 | -0,094446 | <b>-0,6389775</b> | 1622 | 1690 | <b>1656</b>   |



|          |           |           |                   |      |      |               |
|----------|-----------|-----------|-------------------|------|------|---------------|
| ASTN2    | -1,236078 | -0,041634 | <b>-0,638856</b>  | 1375 | 1819 | <b>1597</b>   |
| ACOT12   | 0,026561  | -1,303894 | <b>-0,6386665</b> | 1634 | 2548 | <b>2091</b>   |
| PLAC1L   | -0,983615 | -0,29245  | <b>-0,6380325</b> | 2098 | 2375 | <b>2236,5</b> |
| SLC1A3   | -0,383244 | -0,892723 | <b>-0,6379835</b> | 1369 | 2021 | <b>1695</b>   |
| USP9Y    | -0,391775 | -0,883526 | <b>-0,6376505</b> | 1744 | 2144 | <b>1944</b>   |
| GBP3     | -0,12443  | -1,149399 | <b>-0,6369145</b> | 1644 | 2222 | <b>1933</b>   |
| C13orf27 | -0,539569 | -0,734117 | <b>-0,636843</b>  | 2013 | 2138 | <b>2075,5</b> |
| ANKRD10  | -0,106485 | -1,166697 | <b>-0,636591</b>  | 1980 | 2150 | <b>2065</b>   |
| NAPSA    | -1,160017 | -0,112899 | <b>-0,636458</b>  | 1632 | 2276 | <b>1954</b>   |
| C20orf20 | -0,37789  | -0,894294 | <b>-0,636092</b>  | 1825 | 2234 | <b>2029,5</b> |
| unknown  | -0,241969 | -1,028868 | <b>-0,6354185</b> | 1331 | 1786 | <b>1558,5</b> |
| MAT2B    | -0,146905 | -1,123777 | <b>-0,635341</b>  | 1284 | 2373 | <b>1828,5</b> |
| CALML5   | -0,82289  | -0,447642 | <b>-0,635266</b>  | 1629 | 2117 | <b>1873</b>   |
| HMOX1    | NaN       | -0,63524  | <b>-0,63524</b>   | NaN  | 2560 | <b>2560</b>   |
| UBASH3B  | -1,15074  | -0,119194 | <b>-0,634967</b>  | 1784 | 2192 | <b>1988</b>   |
| WRAP53   | -0,634765 | NaN       | <b>-0,634765</b>  | 1407 | NaN  | <b>1407</b>   |
| RANBP9   | -0,414424 | -0,853433 | <b>-0,6339285</b> | 2064 | 2380 | <b>2222</b>   |
| AMMECR1L | -1,004916 | -0,262836 | <b>-0,633876</b>  | 1504 | 1754 | <b>1629</b>   |
| UBE2U    | -0,596967 | -0,669998 | <b>-0,6334825</b> | 1338 | 2169 | <b>1753,5</b> |
| ELAVL4   | -0,38162  | -0,884076 | <b>-0,632848</b>  | 1011 | 1736 | <b>1373,5</b> |
| CEP19    | -0,162823 | -1,101334 | <b>-0,6320785</b> | 1521 | 2501 | <b>2011</b>   |
| C10orf67 | -0,431675 | -0,832211 | <b>-0,631943</b>  | 1833 | 1955 | <b>1894</b>   |
| GSG2     | -1,17557  | -0,088005 | <b>-0,6317875</b> | 1535 | 2160 | <b>1847,5</b> |
| KIAA1919 | -0,522776 | -0,74057  | <b>-0,631673</b>  | 1567 | 2183 | <b>1875</b>   |
| BPIFB6   | -0,406564 | -0,856423 | <b>-0,6314935</b> | 1549 | 2029 | <b>1789</b>   |
| OR2J3    | -0,631346 | NaN       | <b>-0,631346</b>  | 1619 | NaN  | <b>1619</b>   |
| ITFG1    | -0,302765 | -0,959123 | <b>-0,630944</b>  | 1569 | 2022 | <b>1795,5</b> |
| ZP1      | -0,630942 | NaN       | <b>-0,630942</b>  | 1869 | NaN  | <b>1869</b>   |
| DISP1    | -0,860133 | -0,401463 | <b>-0,630798</b>  | 1683 | 2987 | <b>2335</b>   |
| RALA     | -0,229804 | -1,031722 | <b>-0,630763</b>  | 1386 | 2221 | <b>1803,5</b> |
| CST11    | -0,530616 | -0,730867 | <b>-0,6307415</b> | 1677 | 2155 | <b>1916</b>   |
| SCAND1   | -0,487349 | -0,774066 | <b>-0,6307075</b> | 1562 | 1874 | <b>1718</b>   |
| CHFR     | -0,623501 | -0,637839 | <b>-0,63067</b>   | 1672 | 2224 | <b>1948</b>   |
| SLC16A6  | -0,269574 | -0,991752 | <b>-0,630663</b>  | 1332 | 2190 | <b>1761</b>   |

|           |           |           |                   |      |      |               |
|-----------|-----------|-----------|-------------------|------|------|---------------|
| CCNK      | -0,810671 | -0,450559 | <b>-0,630615</b>  | 1125 | 1712 | <b>1418,5</b> |
| RG9MTD1   | -0,71531  | -0,54562  | <b>-0,630465</b>  | 1133 | 2343 | <b>1738</b>   |
| VPREB1    | -1,187858 | -0,073066 | <b>-0,630462</b>  | 1377 | 1662 | <b>1519,5</b> |
| OLIG1     | -0,496178 | -0,764567 | <b>-0,6303725</b> | 1417 | 1673 | <b>1545</b>   |
| CPA4      | 0,507315  | -1,767527 | <b>-0,630106</b>  | 1145 | 2521 | <b>1833</b>   |
| DSCR4     | -0,051184 | -1,208311 | <b>-0,6297475</b> | 1907 | 2044 | <b>1975,5</b> |
| CALB2     | 0,741077  | -2,000359 | <b>-0,629641</b>  | 1135 | 1738 | <b>1436,5</b> |
| CNNM1     | -1,344392 | 0,085181  | <b>-0,6296055</b> | 2394 | 2316 | <b>2355</b>   |
| CCDC73    | -0,62925  | NaN       | <b>-0,62925</b>   | 1937 | NaN  | <b>1937</b>   |
| SPAG7     | -0,629149 | NaN       | <b>-0,629149</b>  | 1631 | NaN  | <b>1631</b>   |
| XKR6      | -0,722038 | -0,536195 | <b>-0,6291165</b> | 1001 | 1818 | <b>1409,5</b> |
| C11orf63  | -0,628993 | NaN       | <b>-0,628993</b>  | 1942 | NaN  | <b>1942</b>   |
| BMPER     | -0,347753 | -0,909889 | <b>-0,628821</b>  | 1485 | 1684 | <b>1584,5</b> |
| TLL1      | -0,068495 | -1,189137 | <b>-0,628816</b>  | 1611 | 1681 | <b>1646</b>   |
| LEPREL4   | -0,628717 | NaN       | <b>-0,628717</b>  | 1007 | NaN  | <b>1007</b>   |
| PCDH7     | -0,715116 | -0,542275 | <b>-0,6286955</b> | 1554 | 2022 | <b>1788</b>   |
| TGIF1     | -0,458039 | -0,799271 | <b>-0,628655</b>  | 934  | 2044 | <b>1489</b>   |
| TMPRSS11F | -0,071501 | -1,185779 | <b>-0,62864</b>   | 1885 | 2161 | <b>2023</b>   |
| TFAP2D    | -0,786592 | -0,470285 | <b>-0,6284385</b> | 1300 | 1578 | <b>1439</b>   |
| MRGPRG    | -0,628326 | NaN       | <b>-0,628326</b>  | 1581 | NaN  | <b>1581</b>   |
| AKR1B1    | -0,405188 | -0,851307 | <b>-0,6282475</b> | 875  | 1333 | <b>1104</b>   |
| ATXN7L2   | -0,628139 | NaN       | <b>-0,628139</b>  | 1506 | NaN  | <b>1506</b>   |
| CCL16     | -0,624811 | -0,631355 | <b>-0,628083</b>  | 1183 | 1247 | <b>1215</b>   |
| LMAN1L    | -0,628011 | NaN       | <b>-0,628011</b>  | 1364 | NaN  | <b>1364</b>   |
| AKR1C3    | -0,936703 | -0,319114 | <b>-0,6279085</b> | 1241 | 2183 | <b>1712</b>   |
| SCGB1D2   | -0,627699 | NaN       | <b>-0,627699</b>  | 1150 | NaN  | <b>1150</b>   |
| CSF2      | -0,786067 | -0,469312 | <b>-0,6276895</b> | 1547 | 2154 | <b>1850,5</b> |
| INTS5     | -0,376984 | -0,87839  | <b>-0,627687</b>  | 1714 | 2439 | <b>2076,5</b> |
| PROM1     | -0,627529 | NaN       | <b>-0,627529</b>  | 1564 | NaN  | <b>1564</b>   |
| ZBTB49    | -1,201821 | -0,053045 | <b>-0,627433</b>  | 1684 | 2266 | <b>1975</b>   |
| SPRR2E    | -1,064646 | -0,190063 | <b>-0,6273545</b> | 1596 | 2006 | <b>1801</b>   |
| COL10A1   | -0,446368 | -0,808246 | <b>-0,627307</b>  | 1413 | 1940 | <b>1676,5</b> |
| PTOV1     | -1,217914 | -0,033115 | <b>-0,6255145</b> | 1633 | 1460 | <b>1546,5</b> |
| YBX1      | -0,388871 | -0,861839 | <b>-0,625355</b>  | 1575 | 1856 | <b>1715,5</b> |

|          |           |           |                   |      |      |               |
|----------|-----------|-----------|-------------------|------|------|---------------|
| METTL10  | -0,625088 | NaN       | <b>-0,625088</b>  | 1513 | NaN  | <b>1513</b>   |
| KCNA4    | -0,862419 | -0,386673 | <b>-0,624546</b>  | 1080 | 1771 | <b>1425,5</b> |
| PPARA    | -0,363663 | -0,885326 | <b>-0,6244945</b> | 1209 | 1935 | <b>1572</b>   |
| MND1     | -0,624425 | NaN       | <b>-0,624425</b>  | 1322 | NaN  | <b>1322</b>   |
| SALL1    | -0,249758 | -0,998725 | <b>-0,6242415</b> | 1634 | 2505 | <b>2069,5</b> |
| PTPLB    | -0,829971 | -0,417968 | <b>-0,6239695</b> | 890  | 1778 | <b>1334</b>   |
| C1orf177 | -0,623653 | NaN       | <b>-0,623653</b>  | 1432 | NaN  | <b>1432</b>   |
| CHRNA1   | -0,023555 | -1,223649 | <b>-0,623602</b>  | 1918 | 2293 | <b>2105,5</b> |
| SLA2     | -1,50104  | 0,25563   | <b>-0,622705</b>  | 2063 | 2865 | <b>2464</b>   |
| CLTCL1   | -0,856831 | -0,388396 | <b>-0,6226135</b> | 1045 | 1306 | <b>1175,5</b> |
| RAB31L1  | 0,56034   | -1,8054   | <b>-0,62253</b>   | 1544 | 1892 | <b>1718</b>   |
| TMEM100  | -0,502585 | -0,741966 | <b>-0,6222755</b> | 1837 | 2112 | <b>1974,5</b> |
| MS4A7    | -0,562026 | -0,681859 | <b>-0,6219425</b> | 1224 | 1331 | <b>1277,5</b> |
| BIRC7    | -0,657396 | -0,586472 | <b>-0,621934</b>  | 1555 | 2019 | <b>1787</b>   |
| IGSF21   | -0,621807 | NaN       | <b>-0,621807</b>  | 1182 | NaN  | <b>1182</b>   |
| SLC25A10 | -1,358381 | 0,114854  | <b>-0,6217635</b> | 1662 | 2034 | <b>1848</b>   |
| LMO7     | -0,614719 | -0,628643 | <b>-0,621681</b>  | 1444 | 1790 | <b>1617</b>   |
| RRAS     | -0,369348 | -0,873496 | <b>-0,621422</b>  | 1221 | 2211 | <b>1716</b>   |
| CAMTA1   | -0,298649 | -0,943514 | <b>-0,6210815</b> | 1660 | 1969 | <b>1814,5</b> |
| CUX2     | -0,621057 | NaN       | <b>-0,621057</b>  | 1533 | NaN  | <b>1533</b>   |
| ZZZ3     | -1,353807 | 0,111895  | <b>-0,620956</b>  | 1697 | 1941 | <b>1819</b>   |
| B3GNT3   | -0,477541 | -0,763867 | <b>-0,620704</b>  | 1431 | 2241 | <b>1836</b>   |
| GGT6     | -0,48406  | -0,756808 | <b>-0,620434</b>  | 1577 | 1954 | <b>1765,5</b> |
| ROPN1L   | -0,556883 | -0,683753 | <b>-0,620318</b>  | 1501 | 2382 | <b>1941,5</b> |
| TSPAN5   | -0,620182 | NaN       | <b>-0,620182</b>  | 1934 | NaN  | <b>1934</b>   |
| GJB5     | -0,525897 | -0,714316 | <b>-0,6201065</b> | 1402 | 1494 | <b>1448</b>   |
| CACNG8   | -0,37733  | -0,862785 | <b>-0,6200575</b> | 1893 | 2808 | <b>2350,5</b> |
| PYCR2    | -0,873622 | -0,365961 | <b>-0,6197915</b> | 1677 | 2452 | <b>2064,5</b> |
| KIF19    | -1,627604 | 0,388219  | <b>-0,6196925</b> | 1802 | 1956 | <b>1879</b>   |
| LLGL1    | -0,408079 | -0,83107  | <b>-0,6195745</b> | 937  | 2014 | <b>1475,5</b> |
| POLR1A   | -0,969496 | -0,268671 | <b>-0,6190835</b> | 1443 | 1907 | <b>1675</b>   |
| FANCL    | -0,618568 | NaN       | <b>-0,618568</b>  | 1687 | NaN  | <b>1687</b>   |
| VENTX    | -0,640951 | -0,595804 | <b>-0,6183775</b> | 1722 | 2009 | <b>1865,5</b> |
| CSAD     | -0,362525 | -0,874076 | <b>-0,6183005</b> | 2074 | 2325 | <b>2199,5</b> |

|          |           |           |                   |      |      |               |
|----------|-----------|-----------|-------------------|------|------|---------------|
| GZMK     | 0,117927  | -1,354448 | <b>-0,6182605</b> | 1212 | 2149 | <b>1680,5</b> |
| ECD      | -0,175945 | -1,060104 | <b>-0,6180245</b> | 1975 | 2422 | <b>2198,5</b> |
| GKN1     | -0,617999 | NaN       | <b>-0,617999</b>  | 1349 | NaN  | <b>1349</b>   |
| HUWE1    | -0,724787 | -0,509754 | <b>-0,6172705</b> | 1227 | 1870 | <b>1548,5</b> |
| RIMS2    | -0,916567 | -0,317922 | <b>-0,6172445</b> | 2036 | 1714 | <b>1875</b>   |
| EHD1     | -0,664857 | -0,569178 | <b>-0,6170175</b> | 960  | 1475 | <b>1217,5</b> |
| DPCR1    | -0,627338 | -0,60548  | <b>-0,616409</b>  | 1426 | 1418 | <b>1422</b>   |
| KIAA1468 | 0,376159  | -1,608475 | <b>-0,616158</b>  | 1869 | 2147 | <b>2008</b>   |
| STK24    | -0,658314 | -0,573757 | <b>-0,6160355</b> | 2547 | 2043 | <b>2295</b>   |
| REG1B    | -0,331618 | -0,899575 | <b>-0,6155965</b> | 1599 | 1868 | <b>1733,5</b> |
| TRAPPC2L | -0,615378 | NaN       | <b>-0,615378</b>  | 1366 | NaN  | <b>1366</b>   |
| MYBL1    | -0,212359 | -1,018117 | <b>-0,615238</b>  | 1136 | 1580 | <b>1358</b>   |
| TRIM46   | 0,089775  | -1,320097 | <b>-0,615161</b>  | 1466 | 1832 | <b>1649</b>   |
| TMCO2    | -0,212119 | -1,017521 | <b>-0,61482</b>   | 1428 | 1576 | <b>1502</b>   |
| PMVK     | -1,307713 | 0,078295  | <b>-0,614709</b>  | 1749 | 1944 | <b>1846,5</b> |
| AGPHD1   | -0,614686 | NaN       | <b>-0,614686</b>  | 1557 | NaN  | <b>1557</b>   |
| SUV420H1 | -0,680628 | -0,548572 | <b>-0,6146</b>    | 1340 | 1742 | <b>1541</b>   |
| HSF2BP   | 0,468315  | -1,697454 | <b>-0,6145695</b> | 1553 | 2527 | <b>2040</b>   |
| TESK1    | -1,197023 | -0,031011 | <b>-0,614017</b>  | 1109 | 2048 | <b>1578,5</b> |
| SUPT6H   | NaN       | -0,613862 | <b>-0,613862</b>  | NaN  | 1511 | <b>1511</b>   |
| PRAMEF12 | -1,673796 | 0,44634   | <b>-0,613728</b>  | 1636 | 2505 | <b>2070,5</b> |
| LCTL     | NaN       | -0,613714 | <b>-0,613714</b>  | NaN  | 2675 | <b>2675</b>   |
| CLDN10   | 0,085762  | -1,312643 | <b>-0,6134405</b> | 2279 | 1972 | <b>2125,5</b> |
| FAM129B  | -0,395846 | -0,829565 | <b>-0,6127055</b> | 1345 | 1685 | <b>1515</b>   |
| GIPC2    | -0,612481 | NaN       | <b>-0,612481</b>  | 1899 | NaN  | <b>1899</b>   |
| TMEM132A | -0,6123   | NaN       | <b>-0,6123</b>    | 1898 | NaN  | <b>1898</b>   |
| GABRP    | -1,124295 | -0,099931 | <b>-0,612113</b>  | 1237 | 1825 | <b>1531</b>   |
| PLEK2    | -0,991891 | -0,231843 | <b>-0,611867</b>  | 1539 | 2056 | <b>1797,5</b> |
| ATP2A1   | -0,394491 | -0,82874  | <b>-0,6116155</b> | 2103 | 2677 | <b>2390</b>   |
| PTPRM    | -1,167195 | -0,055859 | <b>-0,611527</b>  | 1162 | 1768 | <b>1465</b>   |
| CDHR4    | -0,611472 | NaN       | <b>-0,611472</b>  | 1102 | NaN  | <b>1102</b>   |
| FAM73B   | -0,610695 | NaN       | <b>-0,610695</b>  | 1741 | NaN  | <b>1741</b>   |
| BMPR2    | -0,384697 | -0,836454 | <b>-0,6105755</b> | 1979 | 2121 | <b>2050</b>   |
| ENPP6    | -0,767096 | -0,453873 | <b>-0,6104845</b> | 1648 | 2536 | <b>2092</b>   |

|           |           |           |                   |      |      |               |
|-----------|-----------|-----------|-------------------|------|------|---------------|
| VPS13A    | -1,125195 | -0,095556 | <b>-0,6103755</b> | 1536 | 2080 | <b>1808</b>   |
| RPS19BP1  | -0,480653 | -0,739536 | <b>-0,6100945</b> | 1487 | 1413 | <b>1450</b>   |
| MMRN1     | -0,609937 | NaN       | <b>-0,609937</b>  | 1839 | NaN  | <b>1839</b>   |
| ZNF445    | -1,031498 | -0,187354 | <b>-0,609426</b>  | 1966 | 2125 | <b>2045,5</b> |
| CD164     | -0,97125  | -0,24711  | <b>-0,60918</b>   | 1932 | 2480 | <b>2206</b>   |
| ZNF774    | -0,609075 | NaN       | <b>-0,609075</b>  | 2201 | NaN  | <b>2201</b>   |
| FAM179A   | 0,115553  | -1,333309 | <b>-0,608878</b>  | 1489 | 1805 | <b>1647</b>   |
| PPP1R12B  | -0,323604 | -0,894031 | <b>-0,6088175</b> | 1601 | 2331 | <b>1966</b>   |
| MAPK6     | -1,501119 | 0,283559  | <b>-0,60878</b>   | 1677 | 1589 | <b>1633</b>   |
| PRM2      | -0,658449 | -0,559092 | <b>-0,6087705</b> | 1301 | 2241 | <b>1771</b>   |
| SERPINA5  | -0,477234 | -0,740183 | <b>-0,6087085</b> | 1855 | 2185 | <b>2020</b>   |
| SMCR7     | -0,961809 | -0,255407 | <b>-0,608608</b>  | 1727 | 1838 | <b>1782,5</b> |
| CTSS      | -0,974285 | -0,24287  | <b>-0,6085775</b> | 1307 | 2078 | <b>1692,5</b> |
| KRTAP12-1 | -0,608391 | NaN       | <b>-0,608391</b>  | 1470 | NaN  | <b>1470</b>   |
| RAB11FIP3 | -0,608159 | NaN       | <b>-0,608159</b>  | 1365 | NaN  | <b>1365</b>   |
| C9orf167  | -0,619129 | -0,597128 | <b>-0,6081285</b> | 1928 | 2337 | <b>2132,5</b> |
| CASP2     | -1,747149 | 0,531038  | <b>-0,6080555</b> | 1233 | 2075 | <b>1654</b>   |
| C17orf98  | -0,861347 | -0,354581 | <b>-0,607964</b>  | 1480 | 2183 | <b>1831,5</b> |
| PDE11A    | -0,565248 | -0,650662 | <b>-0,607955</b>  | 1525 | 1760 | <b>1642,5</b> |
| VEGFB     | -0,22037  | -0,995424 | <b>-0,607897</b>  | 1602 | 2719 | <b>2160,5</b> |
| FGD6      | -0,607722 | NaN       | <b>-0,607722</b>  | 2328 | NaN  | <b>2328</b>   |
| GPR128    | -0,607719 | NaN       | <b>-0,607719</b>  | 1359 | NaN  | <b>1359</b>   |
| ZNF597    | 0,128404  | -1,343801 | <b>-0,6076985</b> | 1458 | 2653 | <b>2055,5</b> |
| FHOD1     | -1,13246  | -0,082191 | <b>-0,6073255</b> | 1450 | 2009 | <b>1729,5</b> |
| HIST2H2BF | -0,578741 | -0,63587  | <b>-0,6073055</b> | 1778 | 2177 | <b>1977,5</b> |
| GATAD2A   | -0,321684 | -0,892715 | <b>-0,6071995</b> | 1873 | 2121 | <b>1997</b>   |
| BRCC3     | -0,607114 | NaN       | <b>-0,607114</b>  | 1638 | NaN  | <b>1638</b>   |
| GABARAPL2 | -0,186749 | -1,02695  | <b>-0,6068495</b> | 2059 | 2670 | <b>2364,5</b> |
| IL2RG     | -0,936717 | -0,276866 | <b>-0,6067915</b> | 1091 | 1797 | <b>1444</b>   |
| BRD9      | -0,079096 | -1,134471 | <b>-0,6067835</b> | 1564 | 2158 | <b>1861</b>   |
| CNTROB    | 0,190382  | -1,403474 | <b>-0,606546</b>  | 1567 | 1742 | <b>1654,5</b> |
| C21orf2   | -1,495724 | 0,28275   | <b>-0,606487</b>  | 2019 | 2298 | <b>2158,5</b> |
| CCDC14    | -0,659826 | -0,552892 | <b>-0,606359</b>  | 1859 | 2005 | <b>1932</b>   |
| ITIH1     | -0,154355 | -1,058062 | <b>-0,6062085</b> | 1808 | 2015 | <b>1911,5</b> |

|          |           |           |                   |      |      |               |
|----------|-----------|-----------|-------------------|------|------|---------------|
| C5orf28  | -0,546421 | -0,66461  | <b>-0,6055155</b> | 1466 | 1768 | <b>1617</b>   |
| PSMC1    | -0,5439   | -0,666515 | <b>-0,6052075</b> | 842  | 795  | <b>818,5</b>  |
| C5orf15  | -0,166602 | -1,04371  | <b>-0,605156</b>  | 1381 | 1764 | <b>1572,5</b> |
| ADCY10   | -0,558571 | -0,651158 | <b>-0,6048645</b> | 1522 | 1874 | <b>1698</b>   |
| XYLB     | -0,946018 | -0,26358  | <b>-0,604799</b>  | 1969 | 2376 | <b>2172,5</b> |
| MAP3K4   | -0,627812 | -0,581323 | <b>-0,6045675</b> | 1660 | 1769 | <b>1714,5</b> |
| IL1R1    | -1,286401 | 0,077666  | <b>-0,6043675</b> | 1850 | 1940 | <b>1895</b>   |
| PRLR     | -1,115346 | -0,093287 | <b>-0,6043165</b> | 1803 | 1834 | <b>1818,5</b> |
| CIITA    | -0,891325 | -0,316635 | <b>-0,60398</b>   | 1484 | 1681 | <b>1582,5</b> |
| PDHB     | -0,321037 | -0,886662 | <b>-0,6038495</b> | 966  | 1741 | <b>1353,5</b> |
| FCRL3    | -0,603284 | NaN       | <b>-0,603284</b>  | 1203 | NaN  | <b>1203</b>   |
| ST6GAL2  | -0,336692 | -0,869664 | <b>-0,603178</b>  | 1374 | 2142 | <b>1758</b>   |
| CEACAM6  | -0,603023 | NaN       | <b>-0,603023</b>  | 1960 | NaN  | <b>1960</b>   |
| PYGL     | -0,397177 | -0,808472 | <b>-0,6028245</b> | 1937 | 1976 | <b>1956,5</b> |
| DPP10    | -0,772366 | -0,432575 | <b>-0,6024705</b> | 1750 | 2548 | <b>2149</b>   |
| CYP2B6   | -1,269703 | 0,064801  | <b>-0,602451</b>  | 1577 | 1536 | <b>1556,5</b> |
| BATF2    | -0,602125 | NaN       | <b>-0,602125</b>  | 1686 | NaN  | <b>1686</b>   |
| CA2      | -1,138422 | -0,065665 | <b>-0,6020435</b> | 1690 | 2518 | <b>2104</b>   |
| ZNF273   | -0,625178 | -0,578634 | <b>-0,601906</b>  | 1835 | 2339 | <b>2087</b>   |
| CDNF     | -0,074128 | -1,129109 | <b>-0,6016185</b> | 1838 | 2002 | <b>1920</b>   |
| CISD1    | -0,882956 | -0,31939  | <b>-0,601173</b>  | 1741 | 2116 | <b>1928,5</b> |
| SCN3A    | -0,276462 | -0,925817 | <b>-0,6011395</b> | 1775 | 2278 | <b>2026,5</b> |
| FREM2    | -0,547842 | -0,653853 | <b>-0,6008475</b> | 1699 | 1955 | <b>1827</b>   |
| C6orf108 | -0,286376 | -0,915074 | <b>-0,600725</b>  | 1879 | 2013 | <b>1946</b>   |
| S100A14  | -0,985352 | -0,215654 | <b>-0,600503</b>  | 1636 | 2116 | <b>1876</b>   |
| TBC1D10A | -0,600488 | NaN       | <b>-0,600488</b>  | 1481 | NaN  | <b>1481</b>   |
| TMEM168  | -0,454044 | -0,74682  | <b>-0,600432</b>  | 2010 | 2837 | <b>2423,5</b> |
| ZNF567   | -0,600333 | NaN       | <b>-0,600333</b>  | 1956 | NaN  | <b>1956</b>   |
| THOC6    | -0,600322 | NaN       | <b>-0,600322</b>  | 1736 | NaN  | <b>1736</b>   |
| TAS2R40  | -0,266526 | -0,933655 | <b>-0,6000905</b> | 1427 | 2108 | <b>1767,5</b> |
| 03-mars  | -0,642209 | -0,557966 | <b>-0,6000875</b> | 1538 | 2340 | <b>1939</b>   |
| DPP9     | -0,535027 | -0,664998 | <b>-0,6000125</b> | 1807 | 2173 | <b>1990</b>   |
| EFHD1    | -0,599951 | NaN       | <b>-0,599951</b>  | 1672 | NaN  | <b>1672</b>   |
| SLC34A1  | -0,683915 | -0,515392 | <b>-0,5996535</b> | 1058 | 1640 | <b>1349</b>   |

|          |           |           |                   |      |      |               |
|----------|-----------|-----------|-------------------|------|------|---------------|
| DACT3    | -0,716744 | -0,482218 | <b>-0,599481</b>  | 1929 | 1833 | <b>1881</b>   |
| DHX32    | -0,429957 | -0,768889 | <b>-0,599423</b>  | 2195 | 2145 | <b>2170</b>   |
| RERG     | -0,820789 | -0,378054 | <b>-0,5994215</b> | 1511 | 1927 | <b>1719</b>   |
| RAP2B    | 0,783477  | -1,981312 | <b>-0,5989175</b> | 1502 | 2070 | <b>1786</b>   |
| TMEM104  | -0,598548 | NaN       | <b>-0,598548</b>  | 1701 | NaN  | <b>1701</b>   |
| TNPO3    | -0,665929 | -0,531159 | <b>-0,598544</b>  | 1704 | 2020 | <b>1862</b>   |
| HRASLS   | -0,198482 | -0,998601 | <b>-0,5985415</b> | 943  | 2963 | <b>1953</b>   |
| SBSN     | -0,598381 | NaN       | <b>-0,598381</b>  | 1671 | NaN  | <b>1671</b>   |
| SULT1C2  | -1,164173 | -0,032481 | <b>-0,598327</b>  | 1664 | 1984 | <b>1824</b>   |
| C1orf200 | -0,598306 | NaN       | <b>-0,598306</b>  | 1668 | NaN  | <b>1668</b>   |
| GNA12    | -1,013501 | -0,18195  | <b>-0,5977255</b> | 1952 | 2450 | <b>2201</b>   |
| RGMB     | -0,120718 | -1,07472  | <b>-0,597719</b>  | 1870 | 1827 | <b>1848,5</b> |
| MYH8     | -0,714653 | -0,48068  | <b>-0,5976665</b> | 1434 | 2257 | <b>1845,5</b> |
| WDR7     | -1,233517 | 0,038648  | <b>-0,5974345</b> | 1193 | 1551 | <b>1372</b>   |
| UIMC1    | -0,510581 | -0,68412  | <b>-0,5973505</b> | 1375 | 1867 | <b>1621</b>   |
| THY1     | -0,67704  | -0,517528 | <b>-0,597284</b>  | 1607 | 2375 | <b>1991</b>   |
| C7orf52  | -0,375505 | -0,818852 | <b>-0,5971785</b> | 1706 | 1681 | <b>1693,5</b> |
| DOC2A    | -0,597043 | NaN       | <b>-0,597043</b>  | 1427 | NaN  | <b>1427</b>   |
| PERP     | -0,597039 | NaN       | <b>-0,597039</b>  | 1941 | NaN  | <b>1941</b>   |
| NKX3-2   | -0,418685 | -0,773984 | <b>-0,5963345</b> | 1256 | 2624 | <b>1940</b>   |
| HDAC4    | -0,087628 | -1,104999 | <b>-0,5963135</b> | 1049 | 1770 | <b>1409,5</b> |
| ANXA9    | -0,872721 | -0,319371 | <b>-0,596046</b>  | 1171 | 1260 | <b>1215,5</b> |
| SRMS     | -0,087113 | -1,10481  | <b>-0,5959615</b> | 1536 | 2081 | <b>1808,5</b> |
| HERC5    | -0,586845 | -0,604631 | <b>-0,595738</b>  | 1606 | 2131 | <b>1868,5</b> |
| CDC45    | -0,594851 | NaN       | <b>-0,594851</b>  | 1402 | NaN  | <b>1402</b>   |
| CAMK1G   | -0,403689 | -0,785917 | <b>-0,594803</b>  | 1869 | 2106 | <b>1987,5</b> |
| IGF1     | -0,380024 | -0,80942  | <b>-0,594722</b>  | 1111 | 1843 | <b>1477</b>   |
| SYNDIG1  | -1,310644 | 0,1214    | <b>-0,594622</b>  | 1344 | 2105 | <b>1724,5</b> |
| SNF8     | -1,223382 | 0,034521  | <b>-0,5944305</b> | 1698 | 2149 | <b>1923,5</b> |
| LRRN1    | -0,734829 | -0,453876 | <b>-0,5943525</b> | 1665 | 1965 | <b>1815</b>   |
| ATP1A2   | -0,36557  | -0,822619 | <b>-0,5940945</b> | 1239 | 1835 | <b>1537</b>   |
| SETD1A   | -0,752331 | -0,435844 | <b>-0,5940875</b> | 1483 | 2064 | <b>1773,5</b> |
| C5orf46  | -1,218577 | 0,030561  | <b>-0,594008</b>  | 2012 | 2590 | <b>2301</b>   |
| APH1A    | -0,59361  | NaN       | <b>-0,59361</b>   | 1369 | NaN  | <b>1369</b>   |

|          |           |           |                   |      |      |               |
|----------|-----------|-----------|-------------------|------|------|---------------|
| NCBP2    | -0,873478 | -0,3135   | <b>-0,593489</b>  | 1769 | 1924 | <b>1846,5</b> |
| WDR37    | -0,593054 | NaN       | <b>-0,593054</b>  | 1433 | NaN  | <b>1433</b>   |
| CAPN2    | -0,63136  | -0,554363 | <b>-0,5928615</b> | 1827 | 2201 | <b>2014</b>   |
| C17orf96 | 0,27481   | -1,460248 | <b>-0,592719</b>  | 1405 | 1926 | <b>1665,5</b> |
| SPINT1   | 0,737349  | -1,92245  | <b>-0,5925505</b> | 1649 | 2719 | <b>2184</b>   |
| CDK2AP1  | -0,569661 | -0,615148 | <b>-0,5924045</b> | 1496 | 1275 | <b>1385,5</b> |
| TYRO3    | -1,281327 | 0,096569  | <b>-0,592379</b>  | 1346 | 1933 | <b>1639,5</b> |
| SAMSN1   | 0,37999   | -1,564665 | <b>-0,5923375</b> | 1543 | 2036 | <b>1789,5</b> |
| COASY    | -0,612737 | -0,571123 | <b>-0,59193</b>   | 2211 | 1699 | <b>1955</b>   |
| ALS2CR12 | -0,591743 | NaN       | <b>-0,591743</b>  | 1375 | NaN  | <b>1375</b>   |
| ZNF620   | -0,434329 | -0,749129 | <b>-0,591729</b>  | 1148 | 2137 | <b>1642,5</b> |
| MUC13    | -0,478141 | -0,705134 | <b>-0,5916375</b> | 1485 | 1812 | <b>1648,5</b> |
| PER3     | -1,247201 | 0,064201  | <b>-0,5915</b>    | 1333 | 1945 | <b>1639</b>   |
| FAM109B  | -0,976205 | -0,206473 | <b>-0,591339</b>  | 1713 | 1953 | <b>1833</b>   |
| BBC3     | -0,541549 | -0,641024 | <b>-0,5912865</b> | 1540 | 1798 | <b>1669</b>   |
| KPRP     | -0,266985 | -0,915346 | <b>-0,5911655</b> | 1314 | 1461 | <b>1387,5</b> |
| CXCL5    | -0,622838 | -0,559357 | <b>-0,5910975</b> | 1952 | 2921 | <b>2436,5</b> |
| S1PR2    | -0,184488 | -0,997518 | <b>-0,591003</b>  | 1524 | 1363 | <b>1443,5</b> |
| ZFAND3   | -0,197996 | -0,983804 | <b>-0,5909</b>    | 1719 | 1773 | <b>1746</b>   |
| ZNF786   | -0,456877 | -0,724598 | <b>-0,5907375</b> | 1277 | 1975 | <b>1626</b>   |
| VMAC     | -0,141785 | -1,039476 | <b>-0,5906305</b> | 1791 | 2007 | <b>1899</b>   |
| SLC48A1  | -0,350699 | -0,830336 | <b>-0,5905175</b> | 1628 | 1994 | <b>1811</b>   |
| CLU      | -0,590313 | NaN       | <b>-0,590313</b>  | 1356 | NaN  | <b>1356</b>   |
| MLF1IP   | -0,495784 | -0,684621 | <b>-0,5902025</b> | 1663 | 2412 | <b>2037,5</b> |
| ZNF648   | -0,589874 | NaN       | <b>-0,589874</b>  | 1705 | NaN  | <b>1705</b>   |
| POC1B    | -1,74659  | 0,56717   | <b>-0,58971</b>   | 1803 | 2125 | <b>1964</b>   |
| TWSG1    | -0,718005 | -0,459041 | <b>-0,588523</b>  | 1924 | 2269 | <b>2096,5</b> |
| SLC9A2   | -1,176407 | -0,000395 | <b>-0,588401</b>  | 1965 | 2402 | <b>2183,5</b> |
| CLEC11A  | -0,294467 | -0,881987 | <b>-0,588227</b>  | 1506 | 2082 | <b>1794</b>   |
| CEACAM19 | -0,793202 | -0,382986 | <b>-0,588094</b>  | 1498 | 1765 | <b>1631,5</b> |
| T        | -1,33015  | 0,154158  | <b>-0,587996</b>  | 1669 | 2549 | <b>2109</b>   |
| RTCD1    | -0,796639 | -0,378728 | <b>-0,5876835</b> | 1107 | 1536 | <b>1321,5</b> |
| NGFR     | -0,674397 | -0,500542 | <b>-0,5874695</b> | 1680 | 2159 | <b>1919,5</b> |
| BCAS2    | -0,851688 | -0,322683 | <b>-0,5871855</b> | 1342 | 1521 | <b>1431,5</b> |



|          |           |           |                   |      |      |               |
|----------|-----------|-----------|-------------------|------|------|---------------|
| LRRC7    | -0,346289 | -0,827579 | <b>-0,586934</b>  | 1898 | 2238 | <b>2068</b>   |
| EPB42    | 0,321425  | -1,493894 | <b>-0,5862345</b> | 1808 | 1673 | <b>1740,5</b> |
| XRCC5    | -0,834224 | -0,337654 | <b>-0,585939</b>  | 1384 | 1863 | <b>1623,5</b> |
| PALM     | -0,585834 | NaN       | <b>-0,585834</b>  | 1446 | NaN  | <b>1446</b>   |
| C4orf45  | -0,511108 | -0,66051  | <b>-0,585809</b>  | 1715 | 2427 | <b>2071</b>   |
| DOC2B    | -0,953335 | -0,217974 | <b>-0,5856545</b> | 1545 | 2014 | <b>1779,5</b> |
| KLF12    | -0,51324  | -0,655833 | <b>-0,5845365</b> | 1096 | 1998 | <b>1547</b>   |
| ZBTB48   | -0,918373 | -0,250485 | <b>-0,584429</b>  | 1151 | 1550 | <b>1350,5</b> |
| OR6A2    | 0,782363  | -1,950847 | <b>-0,584242</b>  | 2093 | 2204 | <b>2148,5</b> |
| CASP8AP2 | -0,324301 | -0,844062 | <b>-0,5841815</b> | 1559 | 2876 | <b>2217,5</b> |
| MASP1    | -1,046206 | -0,119854 | <b>-0,58303</b>   | 943  | 1738 | <b>1340,5</b> |
| NACA2    | -0,458423 | -0,707445 | <b>-0,582934</b>  | 1502 | 2570 | <b>2036</b>   |
| KCNQ5    | -1,218163 | 0,053513  | <b>-0,582325</b>  | 1701 | 2251 | <b>1976</b>   |
| CLOCK    | -0,323567 | -0,8407   | <b>-0,5821335</b> | 1021 | 1139 | <b>1080</b>   |
| PCSK1N   | -0,446627 | -0,717528 | <b>-0,5820775</b> | 1421 | 1739 | <b>1580</b>   |
| AXIN1    | -0,980527 | -0,183466 | <b>-0,5819965</b> | 1637 | 2266 | <b>1951,5</b> |
| PAG1     | 0,00445   | -1,16814  | <b>-0,581845</b>  | 2112 | 2973 | <b>2542,5</b> |
| SULT4A1  | -0,481199 | -0,682298 | <b>-0,5817485</b> | 1597 | 2547 | <b>2072</b>   |
| PLK4     | -1,118207 | -0,045038 | <b>-0,5816225</b> | 873  | 1445 | <b>1159</b>   |
| TRPM4    | -0,570153 | -0,592777 | <b>-0,581465</b>  | 1767 | 2470 | <b>2118,5</b> |
| KCNK5    | -0,337079 | -0,825681 | <b>-0,58138</b>   | 1672 | 2837 | <b>2254,5</b> |
| CDKN1A   | -0,214886 | -0,94755  | <b>-0,581218</b>  | 1541 | 1863 | <b>1702</b>   |
| HGFAC    | -0,754329 | -0,408095 | <b>-0,581212</b>  | 1491 | 2185 | <b>1838</b>   |
| SLC26A6  | -0,636574 | -0,525519 | <b>-0,5810465</b> | 1815 | 2195 | <b>2005</b>   |
| DCXR     | -0,338975 | -0,823086 | <b>-0,5810305</b> | 1102 | 1552 | <b>1327</b>   |
| SHROOM2  | -1,054186 | -0,107869 | <b>-0,5810275</b> | 2119 | 3408 | <b>2763,5</b> |
| PDCD11   | -0,580554 | NaN       | <b>-0,580554</b>  | 1582 | NaN  | <b>1582</b>   |
| PDZD7    | -0,580479 | NaN       | <b>-0,580479</b>  | 1349 | NaN  | <b>1349</b>   |
| PDE4B    | 0,031827  | -1,192194 | <b>-0,5801835</b> | 1590 | 1999 | <b>1794,5</b> |
| GJD2     | -0,352315 | -0,807922 | <b>-0,5801185</b> | 1660 | 2515 | <b>2087,5</b> |
| MRAP2    | -0,579945 | NaN       | <b>-0,579945</b>  | 1487 | NaN  | <b>1487</b>   |
| LRRC28   | 0,3931    | -1,55268  | <b>-0,57979</b>   | 1792 | 2436 | <b>2114</b>   |
| UVRAG    | -0,596219 | -0,56289  | <b>-0,5795545</b> | 864  | 1482 | <b>1173</b>   |
| SOX11    | -0,529011 | -0,629886 | <b>-0,5794485</b> | 1784 | 2098 | <b>1941</b>   |

|          |           |           |                   |      |      |               |
|----------|-----------|-----------|-------------------|------|------|---------------|
| TAPBP    | -0,632668 | -0,525118 | <b>-0,578893</b>  | 926  | 1504 | <b>1215</b>   |
| ARFGAP2  | -1,173808 | 0,016249  | <b>-0,5787795</b> | 1632 | 1935 | <b>1783,5</b> |
| REV3L    | -0,937843 | -0,21956  | <b>-0,5787015</b> | 1446 | 2278 | <b>1862</b>   |
| SLC22A16 | -0,929684 | -0,226991 | <b>-0,5783375</b> | 1770 | 1837 | <b>1803,5</b> |
| SLC4A4   | 0,026279  | -1,182887 | <b>-0,578304</b>  | 1357 | 2245 | <b>1801</b>   |
| IDO1     | 0,24681   | -1,402998 | <b>-0,578094</b>  | 1616 | 1780 | <b>1698</b>   |
| ZNF354B  | -0,087857 | -1,067969 | <b>-0,577913</b>  | 2150 | 2190 | <b>2170</b>   |
| ZBTB37   | -0,57757  | NaN       | <b>-0,57757</b>   | 1691 | NaN  | <b>1691</b>   |
| ALCAM    | -0,953142 | -0,201944 | <b>-0,577543</b>  | 1927 | 2218 | <b>2072,5</b> |
| ELMO2    | -1,181997 | 0,027812  | <b>-0,5770925</b> | 1714 | 2033 | <b>1873,5</b> |
| GHSR     | -0,576959 | NaN       | <b>-0,576959</b>  | 1033 | NaN  | <b>1033</b>   |
| SF3B5    | -1,214151 | 0,060461  | <b>-0,576845</b>  | 508  | 810  | <b>659</b>    |
| LAIR1    | -0,620491 | -0,532967 | <b>-0,576729</b>  | 1414 | 1552 | <b>1483</b>   |
| YKT6     | -1,476353 | 0,323314  | <b>-0,5765195</b> | 1818 | 2258 | <b>2038</b>   |
| DNASE2   | -1,306167 | 0,153522  | <b>-0,5763225</b> | 1478 | 1762 | <b>1620</b>   |
| LYSMD4   | -1,116729 | -0,03576  | <b>-0,5762445</b> | 1583 | 2106 | <b>1844,5</b> |
| SLC2A13  | -0,694426 | -0,457999 | <b>-0,5762125</b> | 1528 | 1668 | <b>1598</b>   |
| CWH43    | -0,576093 | NaN       | <b>-0,576093</b>  | 1731 | NaN  | <b>1731</b>   |
| TREM1    | -0,529697 | -0,622105 | <b>-0,575901</b>  | 1542 | 2927 | <b>2234,5</b> |
| DCLRE1A  | -1,168743 | 0,017129  | <b>-0,575807</b>  | 2115 | 3099 | <b>2607</b>   |
| ZNF610   | -0,375862 | -0,775442 | <b>-0,575652</b>  | 1931 | 2606 | <b>2268,5</b> |
| ATP2B2   | -0,172839 | -0,977998 | <b>-0,5754185</b> | 961  | 1390 | <b>1175,5</b> |
| FKBP10   | -0,270863 | -0,879871 | <b>-0,575367</b>  | 1607 | 2101 | <b>1854</b>   |
| RNF130   | -0,96003  | -0,190082 | <b>-0,575056</b>  | 973  | 1984 | <b>1478,5</b> |
| STAB1    | -1,17998  | 0,030071  | <b>-0,5749545</b> | 1550 | 2007 | <b>1778,5</b> |
| PLEKHG3  | -1,020317 | -0,129084 | <b>-0,5747005</b> | 1504 | 2025 | <b>1764,5</b> |
| CHMP1A   | -0,909817 | -0,239243 | <b>-0,57453</b>   | 1915 | 2284 | <b>2099,5</b> |
| C9orf11  | -0,897586 | -0,251312 | <b>-0,574449</b>  | 2072 | 2045 | <b>2058,5</b> |
| IGLL1    | -0,786678 | -0,3622   | <b>-0,574439</b>  | 1021 | 1697 | <b>1359</b>   |
| TSTA3    | NaN       | -0,574341 | <b>-0,574341</b>  | NaN  | 2435 | <b>2435</b>   |
| SPTB     | -0,906692 | -0,240974 | <b>-0,573833</b>  | 1900 | 1967 | <b>1933,5</b> |
| TMEM44   | -1,085625 | -0,06186  | <b>-0,5737425</b> | 1095 | 1648 | <b>1371,5</b> |
| ZNF772   | -0,584882 | -0,562518 | <b>-0,5737</b>    | 1783 | 2034 | <b>1908,5</b> |
| KIF22    | NaN       | -0,573697 | <b>-0,573697</b>  | NaN  | 2355 | <b>2355</b>   |

|          |           |           |                   |      |      |               |
|----------|-----------|-----------|-------------------|------|------|---------------|
| GBP2     | -0,836357 | -0,310646 | <b>-0,5735015</b> | 1481 | 2254 | <b>1867,5</b> |
| SPRR2B   | -0,04626  | -1,100151 | <b>-0,5732055</b> | 1972 | 1799 | <b>1885,5</b> |
| FAM133A  | -1,279968 | 0,13362   | <b>-0,573174</b>  | 1328 | 2303 | <b>1815,5</b> |
| PORCN    | -1,195725 | 0,049956  | <b>-0,5728845</b> | 753  | 1122 | <b>937,5</b>  |
| ZNF831   | 0,488113  | -1,633815 | <b>-0,572851</b>  | 1627 | 1860 | <b>1743,5</b> |
| PHLPP1   | -0,625251 | -0,519944 | <b>-0,5725975</b> | 1930 | 2885 | <b>2407,5</b> |
| ODC1     | NaN       | -0,572139 | <b>-0,572139</b>  | NaN  | 1714 | <b>1714</b>   |
| NPC1     | -0,041075 | -1,10311  | <b>-0,5720925</b> | 1801 | 2271 | <b>2036</b>   |
| GSTM1    | -0,605216 | -0,53806  | <b>-0,571638</b>  | 1558 | 1657 | <b>1607,5</b> |
| DUPD1    | -0,855148 | -0,287976 | <b>-0,571562</b>  | 1013 | 1365 | <b>1189</b>   |
| CDKN3    | -0,541133 | -0,601901 | <b>-0,571517</b>  | 1545 | 1704 | <b>1624,5</b> |
| SUCLG1   | -1,954284 | 0,811326  | <b>-0,571479</b>  | 1727 | 1954 | <b>1840,5</b> |
| WDR27    | -0,951017 | -0,190981 | <b>-0,570999</b>  | 1864 | 2330 | <b>2097</b>   |
| NRBP1    | -0,470048 | -0,671681 | <b>-0,5708645</b> | 1533 | 2387 | <b>1960</b>   |
| PDHX     | -0,773417 | -0,36783  | <b>-0,5706235</b> | 1924 | 2707 | <b>2315,5</b> |
| CMTM2    | -0,570417 | NaN       | <b>-0,570417</b>  | 1403 | NaN  | <b>1403</b>   |
| KCNMB1   | 0,188643  | -1,329465 | <b>-0,570411</b>  | 1633 | 2262 | <b>1947,5</b> |
| SH3RF1   | -0,799933 | -0,340826 | <b>-0,5703795</b> | 1717 | 2156 | <b>1936,5</b> |
| ATG2B    | -0,797768 | -0,342946 | <b>-0,570357</b>  | 1460 | 2012 | <b>1736</b>   |
| SLC25A20 | -0,115685 | -1,024899 | <b>-0,570292</b>  | 1532 | 1489 | <b>1510,5</b> |
| DNAJB4   | -0,331146 | -0,808972 | <b>-0,570059</b>  | 1952 | 2498 | <b>2225</b>   |
| EFCAB11  | -0,987636 | -0,152075 | <b>-0,5698555</b> | 1986 | 2266 | <b>2126</b>   |
| POLH     | -0,229591 | -0,909961 | <b>-0,569776</b>  | 1863 | 2091 | <b>1977</b>   |
| BHLHE40  | -0,451267 | -0,688219 | <b>-0,569743</b>  | 1803 | 2383 | <b>2093</b>   |
| ERVFRD-1 | -0,515037 | -0,624441 | <b>-0,569739</b>  | 1279 | 1916 | <b>1597,5</b> |
| SHOX2    | -0,540813 | -0,598239 | <b>-0,569526</b>  | 649  | 1544 | <b>1096,5</b> |
| PCP2     | -0,316656 | -0,822288 | <b>-0,569472</b>  | 1448 | 1564 | <b>1506</b>   |
| SP7      | -0,656728 | -0,481617 | <b>-0,5691725</b> | 1821 | 2619 | <b>2220</b>   |
| ZNF326   | -0,916345 | -0,221949 | <b>-0,569147</b>  | 1501 | 2542 | <b>2021,5</b> |
| INO80C   | -1,063391 | -0,074736 | <b>-0,5690635</b> | 1707 | 2221 | <b>1964</b>   |
| FOXD3    | -1,303903 | 0,16579   | <b>-0,5690565</b> | 1754 | 2035 | <b>1894,5</b> |
| SEC14L3  | -0,320349 | -0,816668 | <b>-0,5685085</b> | 1633 | 2851 | <b>2242</b>   |
| TEX15    | -0,650694 | -0,486313 | <b>-0,5685035</b> | 1450 | 1766 | <b>1608</b>   |
| RWDD2B   | -0,382654 | -0,754298 | <b>-0,568476</b>  | 1175 | 2242 | <b>1708,5</b> |

|           |           |           |                   |      |      |               |
|-----------|-----------|-----------|-------------------|------|------|---------------|
| PKP2      | -0,435748 | -0,701152 | <b>-0,56845</b>   | 1457 | 2058 | <b>1757,5</b> |
| OR7G1     | -0,840096 | -0,2965   | <b>-0,568298</b>  | 1965 | 2026 | <b>1995,5</b> |
| SEC31A    | -0,306743 | -0,829784 | <b>-0,5682635</b> | 1850 | 2186 | <b>2018</b>   |
| PLXNA1    | -0,630531 | -0,505864 | <b>-0,5681975</b> | 772  | 1263 | <b>1017,5</b> |
| PCDHB5    | -0,845481 | -0,290147 | <b>-0,567814</b>  | 1722 | 2829 | <b>2275,5</b> |
| TMEM33    | -0,567729 | NaN       | <b>-0,567729</b>  | 1244 | NaN  | <b>1244</b>   |
| ABCC6     | -0,146008 | -0,988591 | <b>-0,5672995</b> | 1481 | 2565 | <b>2023</b>   |
| FBN3      | -0,931875 | -0,202421 | <b>-0,567148</b>  | 1579 | 1942 | <b>1760,5</b> |
| ANKRD34A  | -1,378089 | 0,244328  | <b>-0,5668805</b> | 1408 | 1995 | <b>1701,5</b> |
| C6orf70   | -0,996107 | -0,137605 | <b>-0,566856</b>  | 1674 | 1499 | <b>1586,5</b> |
| C2CD4A    | -0,566789 | NaN       | <b>-0,566789</b>  | 1559 | NaN  | <b>1559</b>   |
| OR52K2    | -0,574959 | -0,557392 | <b>-0,5661755</b> | 1535 | 1962 | <b>1748,5</b> |
| UBAP1     | -0,528844 | -0,603354 | <b>-0,566099</b>  | 1820 | 2135 | <b>1977,5</b> |
| KCNMA1    | -1,181119 | 0,049091  | <b>-0,566014</b>  | 1406 | 2442 | <b>1924</b>   |
| ZNF668    | -0,56552  | NaN       | <b>-0,56552</b>   | 1245 | NaN  | <b>1245</b>   |
| VIL1      | -0,565482 | NaN       | <b>-0,565482</b>  | 1921 | NaN  | <b>1921</b>   |
| LOC221710 | -0,773549 | -0,357047 | <b>-0,565298</b>  | 1933 | 2026 | <b>1979,5</b> |
| SPCS1     | -0,768345 | -0,361311 | <b>-0,564828</b>  | 1762 | 2189 | <b>1975,5</b> |
| UQCC      | -0,88578  | -0,243619 | <b>-0,5646995</b> | 1813 | 2261 | <b>2037</b>   |
| KRT39     | -0,57024  | -0,559088 | <b>-0,564664</b>  | 1218 | 1653 | <b>1435,5</b> |
| DNAH1     | -0,564489 | -0,564333 | <b>-0,564411</b>  | 1885 | 2371 | <b>2128</b>   |
| HLA-F     | -0,564236 | NaN       | <b>-0,564236</b>  | 1379 | NaN  | <b>1379</b>   |
| PRR14L    | -0,653035 | -0,475347 | <b>-0,564191</b>  | 1936 | 1988 | <b>1962</b>   |
| IRAK4     | -0,072149 | -1,056099 | <b>-0,564124</b>  | 2079 | 1932 | <b>2005,5</b> |
| HPS1      | -0,402273 | -0,725551 | <b>-0,563912</b>  | 1849 | 1672 | <b>1760,5</b> |
| FAM190B   | -0,603734 | -0,523726 | <b>-0,56373</b>   | 1488 | 1822 | <b>1655</b>   |
| DNAI2     | -0,263738 | -0,862871 | <b>-0,5633045</b> | 1231 | 1365 | <b>1298</b>   |
| SPN       | -0,490567 | -0,635952 | <b>-0,5632595</b> | 1676 | 2439 | <b>2057,5</b> |
| CPS1      | NaN       | -0,563202 | <b>-0,563202</b>  | NaN  | 2502 | <b>2502</b>   |
| HELB      | -0,5957   | -0,530404 | <b>-0,563052</b>  | 1567 | 2187 | <b>1877</b>   |
| ELMO3     | -1,373156 | 0,247547  | <b>-0,5628045</b> | 1250 | 1403 | <b>1326,5</b> |
| NT5DC1    | -0,555805 | -0,569617 | <b>-0,562711</b>  | 1794 | 1995 | <b>1894,5</b> |
| ARAP3     | -0,562562 | NaN       | <b>-0,562562</b>  | 1107 | NaN  | <b>1107</b>   |
| HMP19     | -1,195626 | 0,071016  | <b>-0,562305</b>  | 1408 | 1818 | <b>1613</b>   |

|          |           |           |                   |      |      |               |
|----------|-----------|-----------|-------------------|------|------|---------------|
| SLC6A3   | -0,232925 | -0,891593 | <b>-0,562259</b>  | 1544 | 1734 | <b>1639</b>   |
| GTF2E1   | -0,217476 | -0,906349 | <b>-0,5619125</b> | 1467 | 1692 | <b>1579,5</b> |
| SPANXN3  | -0,068947 | -1,054832 | <b>-0,5618895</b> | 1424 | 1636 | <b>1530</b>   |
| ADAMTS10 | -0,250683 | -0,872874 | <b>-0,5617785</b> | 1524 | 1970 | <b>1747</b>   |
| B4GALT4  | 0,336445  | -1,459706 | <b>-0,5616305</b> | 1373 | 1733 | <b>1553</b>   |
| MDH1     | -0,606875 | -0,516366 | <b>-0,5616205</b> | 1201 | 1877 | <b>1539</b>   |
| SCN1B    | -0,763343 | -0,359896 | <b>-0,5616195</b> | 1838 | 2181 | <b>2009,5</b> |
| CLK2     | -0,688153 | -0,435054 | <b>-0,5616035</b> | 1905 | 1973 | <b>1939</b>   |
| GPR83    | -0,561538 | NaN       | <b>-0,561538</b>  | 989  | NaN  | <b>989</b>    |
| GPR171   | -0,561418 | NaN       | <b>-0,561418</b>  | 1262 | NaN  | <b>1262</b>   |
| OR9Q2    | -0,376625 | -0,745491 | <b>-0,561058</b>  | 1712 | 2221 | <b>1966,5</b> |
| OR10G8   | -0,668641 | -0,45337  | <b>-0,5610055</b> | 1624 | 2351 | <b>1987,5</b> |
| FKTN     | -0,383604 | -0,738384 | <b>-0,560994</b>  | 1568 | 2540 | <b>2054</b>   |
| LIFR     | NaN       | -0,560857 | <b>-0,560857</b>  | NaN  | 2652 | <b>2652</b>   |
| AGBL3    | -0,489985 | -0,631373 | <b>-0,560679</b>  | 1718 | 2365 | <b>2041,5</b> |
| TBC1D22A | -1,120167 | -0,001044 | <b>-0,5606055</b> | 1361 | 2191 | <b>1776</b>   |
| FBXO18   | -0,838662 | -0,282453 | <b>-0,5605575</b> | 1653 | 3108 | <b>2380,5</b> |
| ZCCHC8   | -0,077457 | -1,042874 | <b>-0,5601655</b> | 2005 | 2429 | <b>2217</b>   |
| ZNF222   | -1,193208 | 0,073325  | <b>-0,5599415</b> | 1186 | 2316 | <b>1751</b>   |
| RPUSD1   | -0,618011 | -0,500824 | <b>-0,5594175</b> | 1503 | 1779 | <b>1641</b>   |
| FMR1     | -0,729691 | -0,388779 | <b>-0,559235</b>  | 1731 | 2177 | <b>1954</b>   |
| KRTAP5-3 | -1,740618 | 0,622278  | <b>-0,55917</b>   | 1763 | 1184 | <b>1473,5</b> |
| MAP1LC3C | -0,722281 | -0,395225 | <b>-0,558753</b>  | 1708 | 1977 | <b>1842,5</b> |
| KLF6     | -0,323207 | -0,794267 | <b>-0,558737</b>  | 2203 | 2794 | <b>2498,5</b> |
| C13orf15 | -0,558512 | NaN       | <b>-0,558512</b>  | 1336 | NaN  | <b>1336</b>   |
| DENND4C  | -0,373573 | -0,743415 | <b>-0,558494</b>  | 1529 | 1737 | <b>1633</b>   |
| BBS4     | -1,100804 | -0,016109 | <b>-0,5584565</b> | 2123 | 2104 | <b>2113,5</b> |
| MRPL27   | -0,726845 | -0,390026 | <b>-0,5584355</b> | 1677 | 2001 | <b>1839</b>   |
| PBX4     | -1,561635 | 0,44479   | <b>-0,5584225</b> | 1851 | 2123 | <b>1987</b>   |
| ADRM1    | 0,787332  | -1,904    | <b>-0,558334</b>  | 1694 | 1998 | <b>1846</b>   |
| ATXN10   | -0,323574 | -0,792347 | <b>-0,5579605</b> | 1756 | 2312 | <b>2034</b>   |
| CTCF     | -0,989408 | -0,126061 | <b>-0,5577345</b> | 1782 | 2452 | <b>2117</b>   |
| MAGEA12  | -0,375688 | -0,738841 | <b>-0,5572645</b> | 1250 | 1664 | <b>1457</b>   |
| TSLP     | -0,600935 | -0,513394 | <b>-0,5571645</b> | 1485 | 1740 | <b>1612,5</b> |

|          |           |           |                   |      |      |               |
|----------|-----------|-----------|-------------------|------|------|---------------|
| SIPA1L1  | -0,557068 | NaN       | <b>-0,557068</b>  | 1401 | NaN  | <b>1401</b>   |
| INA      | 0,312284  | -1,426407 | <b>-0,5570615</b> | 1369 | 2156 | <b>1762,5</b> |
| THAP10   | -0,557038 | NaN       | <b>-0,557038</b>  | 1671 | NaN  | <b>1671</b>   |
| ZCCHC10  | -1,338258 | 0,224315  | <b>-0,5569715</b> | 2061 | 2995 | <b>2528</b>   |
| KRT8     | -0,902065 | -0,211588 | <b>-0,5568265</b> | 1201 | 1782 | <b>1491,5</b> |
| KIAA1279 | -1,258928 | 0,145639  | <b>-0,5566445</b> | 1967 | 2687 | <b>2327</b>   |
| PRRC2A   | -0,731468 | -0,381807 | <b>-0,5566375</b> | 1505 | 2050 | <b>1777,5</b> |
| LRRC29   | -0,339537 | -0,773311 | <b>-0,556424</b>  | 1307 | 2462 | <b>1884,5</b> |
| ATP1B3   | -0,33687  | -0,775746 | <b>-0,556308</b>  | 1255 | 1663 | <b>1459</b>   |
| GIT2     | -0,420681 | -0,691925 | <b>-0,556303</b>  | 1861 | 2135 | <b>1998</b>   |
| UCP1     | -0,563463 | -0,54914  | <b>-0,5563015</b> | 2005 | 2379 | <b>2192</b>   |
| MAPK9    | -0,717277 | -0,394348 | <b>-0,5558125</b> | 1763 | 1749 | <b>1756</b>   |
| ZNF488   | -0,121769 | -0,989213 | <b>-0,555491</b>  | 1845 | 1967 | <b>1906</b>   |
| NRP2     | -0,226931 | -0,883996 | <b>-0,5554635</b> | 1733 | 1910 | <b>1821,5</b> |
| CTNNAL1  | -0,555438 | NaN       | <b>-0,555438</b>  | 1976 | NaN  | <b>1976</b>   |
| CYP2E1   | -1,392995 | 0,282625  | <b>-0,555185</b>  | 1832 | 1993 | <b>1912,5</b> |
| EFCAB2   | -0,554808 | NaN       | <b>-0,554808</b>  | 1452 | NaN  | <b>1452</b>   |
| OBFC2B   | -0,554762 | NaN       | <b>-0,554762</b>  | 1518 | NaN  | <b>1518</b>   |
| TBC1D5   | -0,549211 | -0,560115 | <b>-0,554663</b>  | 1651 | 2425 | <b>2038</b>   |
| CD300E   | -0,554477 | NaN       | <b>-0,554477</b>  | 1744 | NaN  | <b>1744</b>   |
| FAM3D    | -0,327076 | -0,781817 | <b>-0,5544465</b> | 1482 | 2115 | <b>1798,5</b> |
| DCP1B    | -0,640304 | -0,4684   | <b>-0,554352</b>  | 1518 | 2014 | <b>1766</b>   |
| MRGPRF   | -0,553974 | NaN       | <b>-0,553974</b>  | 1495 | NaN  | <b>1495</b>   |
| C22orf42 | -0,668758 | -0,438816 | <b>-0,553787</b>  | 1839 | 1879 | <b>1859</b>   |
| EMD      | -0,824408 | -0,281006 | <b>-0,552707</b>  | 2059 | 2063 | <b>2061</b>   |
| C5orf34  | -0,552372 | NaN       | <b>-0,552372</b>  | 1999 | NaN  | <b>1999</b>   |
| PCDHA10  | -0,552054 | NaN       | <b>-0,552054</b>  | 989  | NaN  | <b>989</b>    |
| TAAR1    | -0,551923 | NaN       | <b>-0,551923</b>  | 1212 | NaN  | <b>1212</b>   |
| TRPT1    | -0,423481 | -0,680276 | <b>-0,5518785</b> | 1453 | 1752 | <b>1602,5</b> |
| GPR44    | -0,551871 | NaN       | <b>-0,551871</b>  | 1034 | NaN  | <b>1034</b>   |
| CPXM2    | -1,221052 | 0,117337  | <b>-0,5518575</b> | 1239 | 1744 | <b>1491,5</b> |
| OR10H2   | -1,059398 | -0,044064 | <b>-0,551731</b>  | 1211 | 1825 | <b>1518</b>   |
| TSEN2    | -0,582271 | -0,520922 | <b>-0,5515965</b> | 1714 | 1778 | <b>1746</b>   |
| EIF4G1   | -0,752568 | -0,350496 | <b>-0,551532</b>  | 1398 | 1741 | <b>1569,5</b> |

|           |           |           |                   |      |      |               |
|-----------|-----------|-----------|-------------------|------|------|---------------|
| BAALC     | -0,431691 | -0,671322 | <b>-0,5515065</b> | 1523 | 2805 | <b>2164</b>   |
| CREB3L3   | -0,159966 | -0,94258  | <b>-0,551273</b>  | 859  | 2290 | <b>1574,5</b> |
| NMS       | -0,511298 | -0,591139 | <b>-0,5512185</b> | 1289 | 2240 | <b>1764,5</b> |
| TOR1AIP2  | -1,75359  | 0,652029  | <b>-0,5507805</b> | 1628 | 2139 | <b>1883,5</b> |
| PBK       | -1,069707 | -0,031527 | <b>-0,550617</b>  | 1103 | 2229 | <b>1666</b>   |
| PRPF38B   | -0,550565 | NaN       | <b>-0,550565</b>  | 1488 | NaN  | <b>1488</b>   |
| MSI2      | -1,274321 | 0,173732  | <b>-0,5502945</b> | 1555 | 2634 | <b>2094,5</b> |
| ARHGEF10L | -0,415417 | -0,684923 | <b>-0,55017</b>   | 1535 | 1606 | <b>1570,5</b> |
| ALDH5A1   | 0,108001  | -1,207467 | <b>-0,549733</b>  | 1860 | 1705 | <b>1782,5</b> |
| C16orf80  | -0,453903 | -0,644868 | <b>-0,5493855</b> | 1480 | 1812 | <b>1646</b>   |
| DCST2     | 0,161187  | -1,259791 | <b>-0,549302</b>  | 1684 | 1983 | <b>1833,5</b> |
| NR1D2     | 0,584602  | -1,683044 | <b>-0,549221</b>  | 2192 | 2691 | <b>2441,5</b> |
| OR6M1     | -0,337027 | -0,761405 | <b>-0,549216</b>  | 1254 | 1926 | <b>1590</b>   |
| ST3GAL6   | -0,363588 | -0,734182 | <b>-0,548885</b>  | 1531 | 2486 | <b>2008,5</b> |
| ATP5C1    | 0,107601  | -1,204537 | <b>-0,548468</b>  | 1985 | 2888 | <b>2436,5</b> |
| ZNF575    | -0,548466 | NaN       | <b>-0,548466</b>  | 1692 | NaN  | <b>1692</b>   |
| FAM134C   | -0,548303 | NaN       | <b>-0,548303</b>  | 1629 | NaN  | <b>1629</b>   |
| PEX6      | -1,127913 | 0,031346  | <b>-0,5482835</b> | 1774 | 2290 | <b>2032</b>   |
| RNF186    | -0,150796 | -0,945676 | <b>-0,548236</b>  | 1976 | 2017 | <b>1996,5</b> |
| KRT24     | -0,031931 | -1,064149 | <b>-0,54804</b>   | 1036 | 994  | <b>1015</b>   |
| CCL2      | -0,525409 | -0,570144 | <b>-0,5477765</b> | 1605 | 1933 | <b>1769</b>   |
| LRAT      | -0,681478 | -0,414027 | <b>-0,5477525</b> | 1013 | 1769 | <b>1391</b>   |
| BRWD1     | -0,139654 | -0,955843 | <b>-0,5477485</b> | 1924 | 2610 | <b>2267</b>   |
| ZNF324B   | -1,124726 | 0,030334  | <b>-0,547196</b>  | 1714 | 2239 | <b>1976,5</b> |
| ST5       | -0,760716 | -0,333246 | <b>-0,546981</b>  | 1614 | 2152 | <b>1883</b>   |
| PRDM13    | -0,663338 | -0,430457 | <b>-0,5468975</b> | 1751 | 2069 | <b>1910</b>   |
| C17orf59  | -0,185577 | -0,907758 | <b>-0,5466675</b> | 1233 | 1470 | <b>1351,5</b> |
| SLC25A33  | -0,421983 | -0,670902 | <b>-0,5464425</b> | 1541 | 1635 | <b>1588</b>   |
| SELM      | -0,222044 | -0,870485 | <b>-0,5462645</b> | 1223 | 1921 | <b>1572</b>   |
| OR2M7     | -0,236894 | -0,853733 | <b>-0,5453135</b> | 1608 | 1666 | <b>1637</b>   |
| SLC22A9   | -0,662867 | -0,426138 | <b>-0,5445025</b> | 1407 | 1785 | <b>1596</b>   |
| SORD      | -0,481912 | -0,606823 | <b>-0,5443675</b> | 1126 | 1663 | <b>1394,5</b> |
| ZNF366    | -0,548349 | -0,540363 | <b>-0,544356</b>  | 1254 | 1485 | <b>1369,5</b> |
| C3orf65   | -1,020296 | -0,067812 | <b>-0,544054</b>  | 1658 | 1815 | <b>1736,5</b> |

|          |           |           |                   |      |      |               |
|----------|-----------|-----------|-------------------|------|------|---------------|
| SLC7A1   | -0,24446  | -0,843505 | <b>-0,5439825</b> | 1318 | 1895 | <b>1606,5</b> |
| RBM4B    | -0,543946 | NaN       | <b>-0,543946</b>  | 1213 | NaN  | <b>1213</b>   |
| LRRC2    | -1,089622 | 0,001811  | <b>-0,5439055</b> | 2275 | 2072 | <b>2173,5</b> |
| RASD1    | -0,267218 | -0,820575 | <b>-0,5438965</b> | 1885 | 2701 | <b>2293</b>   |
| P2RY14   | -0,619523 | -0,468228 | <b>-0,5438755</b> | 1153 | 1654 | <b>1403,5</b> |
| ARMC2    | -0,44381  | -0,643438 | <b>-0,543624</b>  | 1649 | 1553 | <b>1601</b>   |
| FBXO25   | -1,174307 | 0,087125  | <b>-0,543591</b>  | 1871 | 2995 | <b>2433</b>   |
| ARF6     | NaN       | -0,54343  | <b>-0,54343</b>   | NaN  | 2356 | <b>2356</b>   |
| CCRN4L   | -0,642238 | -0,444502 | <b>-0,54337</b>   | 1594 | 2534 | <b>2064</b>   |
| MFI2     | -0,829724 | -0,256877 | <b>-0,5433005</b> | 1618 | 1094 | <b>1356</b>   |
| CHSY3    | NaN       | -0,543272 | <b>-0,543272</b>  | NaN  | 2395 | <b>2395</b>   |
| OR6N1    | -0,705583 | -0,380889 | <b>-0,543236</b>  | 1761 | 2074 | <b>1917,5</b> |
| ATP5SL   | -0,318044 | -0,768171 | <b>-0,5431075</b> | 1573 | 2375 | <b>1974</b>   |
| GCG      | -0,649065 | -0,437052 | <b>-0,5430585</b> | 808  | 1781 | <b>1294,5</b> |
| CDC42EP3 | -0,741998 | -0,343944 | <b>-0,542971</b>  | 477  | 964  | <b>720,5</b>  |
| PPP1R12C | -1,315172 | 0,229296  | <b>-0,542938</b>  | 1293 | 2206 | <b>1749,5</b> |
| MCM6     | -0,398578 | -0,687108 | <b>-0,542843</b>  | 1321 | 2609 | <b>1965</b>   |
| BHLHE23  | -0,542765 | NaN       | <b>-0,542765</b>  | 1233 | NaN  | <b>1233</b>   |
| DCLRE1C  | -0,580473 | -0,505016 | <b>-0,5427445</b> | 1828 | 2137 | <b>1982,5</b> |
| TRMT61A  | -0,542086 | -0,542712 | <b>-0,542399</b>  | 1433 | 2364 | <b>1898,5</b> |
| ACSL1    | 0,208921  | -1,293194 | <b>-0,5421365</b> | 1551 | 2666 | <b>2108,5</b> |
| THUMPD1  | -0,354145 | -0,729987 | <b>-0,542066</b>  | 1508 | 1981 | <b>1744,5</b> |
| F13A1    | NaN       | -0,541866 | <b>-0,541866</b>  | NaN  | 2378 | <b>2378</b>   |
| ZDHHC6   | -0,541858 | NaN       | <b>-0,541858</b>  | 1882 | NaN  | <b>1882</b>   |
| MAGEL2   | -0,541806 | NaN       | <b>-0,541806</b>  | 1305 | NaN  | <b>1305</b>   |
| EID2     | -1,016752 | -0,066748 | <b>-0,54175</b>   | 1384 | 2029 | <b>1706,5</b> |
| ALOX5    | -0,637536 | -0,445672 | <b>-0,541604</b>  | 1724 | 2091 | <b>1907,5</b> |
| CAPG     | -0,113724 | -0,967978 | <b>-0,540851</b>  | 1167 | 1514 | <b>1340,5</b> |
| FBXO31   | -0,769692 | -0,311151 | <b>-0,540601</b>  | 1792 | 2913 | <b>2352,5</b> |
| RBFOX3   | -0,759911 | -0,320556 | <b>-0,5402335</b> | 1571 | 1916 | <b>1743,5</b> |
| CRB2     | 0,809568  | -1,889568 | <b>-0,54</b>      | 1601 | 2147 | <b>1874</b>   |
| MRGPRX2  | -0,539505 | NaN       | <b>-0,539505</b>  | 1900 | NaN  | <b>1900</b>   |
| DSCR9    | -0,539488 | NaN       | <b>-0,539488</b>  | 1531 | NaN  | <b>1531</b>   |
| SLC19A1  | -0,24098  | -0,837902 | <b>-0,539441</b>  | 1204 | 2325 | <b>1764,5</b> |



|          |           |           |                   |      |      |               |
|----------|-----------|-----------|-------------------|------|------|---------------|
| C19orf40 | -0,60341  | -0,4754   | <b>-0,539405</b>  | 1482 | 1562 | <b>1522</b>   |
| IL4R     | -0,396447 | -0,682107 | <b>-0,539277</b>  | 807  | 1876 | <b>1341,5</b> |
| CTPS     | -0,416212 | -0,662173 | <b>-0,5391925</b> | 742  | 1359 | <b>1050,5</b> |
| MMEL1    | -0,417738 | -0,660247 | <b>-0,5389925</b> | 1807 | 2316 | <b>2061,5</b> |
| TMEM232  | -0,666656 | -0,411112 | <b>-0,538888</b>  | 1960 | 1618 | <b>1789</b>   |
| PILRA    | -0,53851  | NaN       | <b>-0,53851</b>   | 1601 | NaN  | <b>1601</b>   |
| EHD2     | -0,110133 | -0,966791 | <b>-0,538462</b>  | 1815 | 2049 | <b>1932</b>   |
| OSMR     | NaN       | -0,538319 | <b>-0,538319</b>  | NaN  | 2789 | <b>2789</b>   |
| LRRC1    | -0,709631 | -0,366779 | <b>-0,538205</b>  | 1382 | 2528 | <b>1955</b>   |
| PKDCC    | -0,050091 | -1,026204 | <b>-0,5381475</b> | 1193 | 1858 | <b>1525,5</b> |
| RFTN1    | -1,173084 | 0,096816  | <b>-0,538134</b>  | 1774 | 2596 | <b>2185</b>   |
| PADI1    | -1,14962  | 0,073406  | <b>-0,538107</b>  | 1572 | 1757 | <b>1664,5</b> |
| SAMD7    | -0,494179 | -0,581967 | <b>-0,538073</b>  | 1545 | 2123 | <b>1834</b>   |
| SPRED1   | 0,931653  | -2,007254 | <b>-0,5378005</b> | 2134 | 2368 | <b>2251</b>   |
| FAM113A  | -0,413875 | -0,661423 | <b>-0,537649</b>  | 1399 | 1918 | <b>1658,5</b> |
| KIT      | -0,435741 | -0,639118 | <b>-0,5374295</b> | 2317 | 2159 | <b>2238</b>   |
| RLN2     | -0,506749 | -0,56801  | <b>-0,5373795</b> | 1910 | 2309 | <b>2109,5</b> |
| CCNG1    | -0,847656 | -0,226941 | <b>-0,5372985</b> | 1619 | 2205 | <b>1912</b>   |
| C7orf36  | -0,766139 | -0,308014 | <b>-0,5370765</b> | 1760 | 1874 | <b>1817</b>   |
| MRPL28   | -0,537055 | NaN       | <b>-0,537055</b>  | 1656 | NaN  | <b>1656</b>   |
| OR56A3   | -0,638957 | -0,435113 | <b>-0,537035</b>  | 1027 | 1204 | <b>1115,5</b> |
| KLK6     | -0,307171 | -0,76688  | <b>-0,5370255</b> | 1037 | 1967 | <b>1502</b>   |
| KLHDC9   | -0,176639 | -0,897006 | <b>-0,5368225</b> | 1783 | 2086 | <b>1934,5</b> |
| ITGB4    | -0,178633 | -0,894931 | <b>-0,536782</b>  | 1231 | 1530 | <b>1380,5</b> |
| OTUD7B   | -0,185859 | -0,887592 | <b>-0,5367255</b> | 1630 | 2331 | <b>1980,5</b> |
| C20orf29 | -0,536528 | NaN       | <b>-0,536528</b>  | 1522 | NaN  | <b>1522</b>   |
| LAMB1    | -0,246851 | -0,825308 | <b>-0,5360795</b> | 1762 | 2392 | <b>2077</b>   |
| PRELP    | -0,535977 | NaN       | <b>-0,535977</b>  | 1640 | NaN  | <b>1640</b>   |
| TMEM178  | 0,035142  | -1,106742 | <b>-0,5358</b>    | 2083 | 2331 | <b>2207</b>   |
| CPNE7    | NaN       | -0,535538 | <b>-0,535538</b>  | NaN  | 2717 | <b>2717</b>   |
| CCDC58   | -0,535432 | NaN       | <b>-0,535432</b>  | 1578 | NaN  | <b>1578</b>   |
| CMTM3    | -0,604652 | -0,466152 | <b>-0,535402</b>  | 1846 | 2127 | <b>1986,5</b> |
| GBA2     | -0,638243 | -0,432013 | <b>-0,535128</b>  | 1596 | 2010 | <b>1803</b>   |
| EPHA3    | 0,316626  | -1,386668 | <b>-0,535021</b>  | 1754 | 1732 | <b>1743</b>   |

|          |           |           |                   |      |      |               |
|----------|-----------|-----------|-------------------|------|------|---------------|
| LRRCC1   | -0,802939 | -0,266776 | <b>-0,5348575</b> | 1920 | 2198 | <b>2059</b>   |
| RTKN     | 0,229049  | -1,298262 | <b>-0,5346065</b> | 1282 | 1800 | <b>1541</b>   |
| XRCC6BP1 | -0,571885 | -0,497065 | <b>-0,534475</b>  | 1320 | 2145 | <b>1732,5</b> |
| TMEM225  | -0,534334 | NaN       | <b>-0,534334</b>  | 2001 | NaN  | <b>2001</b>   |
| HRH4     | -0,53424  | NaN       | <b>-0,53424</b>   | 1933 | NaN  | <b>1933</b>   |
| PLSCR1   | -1,250431 | 0,182233  | <b>-0,534099</b>  | 2107 | 3065 | <b>2586</b>   |
| SNX13    | -0,254708 | -0,812539 | <b>-0,5336235</b> | 2166 | 2624 | <b>2395</b>   |
| FAM26D   | -0,771486 | -0,295406 | <b>-0,533446</b>  | 1536 | 2163 | <b>1849,5</b> |
| ECHDC3   | 0,306774  | -1,37351  | <b>-0,533368</b>  | 1588 | 2070 | <b>1829</b>   |
| CCDC6    | -0,346251 | -0,719671 | <b>-0,532961</b>  | 2437 | 2283 | <b>2360</b>   |
| NPTX2    | -0,570943 | -0,494767 | <b>-0,532855</b>  | 1237 | 1783 | <b>1510</b>   |
| UCN3     | -0,828694 | -0,236877 | <b>-0,5327855</b> | 1574 | 2349 | <b>1961,5</b> |
| CRIPT    | -0,242437 | -0,823128 | <b>-0,5327825</b> | 1747 | 2365 | <b>2056</b>   |
| COX7A2   | -0,655225 | -0,410084 | <b>-0,5326545</b> | 1314 | 2403 | <b>1858,5</b> |
| MAT2A    | -0,204114 | -0,860823 | <b>-0,5324685</b> | 1028 | 1605 | <b>1316,5</b> |
| GK5      | -0,44039  | -0,624523 | <b>-0,5324565</b> | 1460 | 2253 | <b>1856,5</b> |
| TRIM15   | -0,255834 | -0,808658 | <b>-0,532246</b>  | 1310 | 2169 | <b>1739,5</b> |
| EFCAB4A  | 0,280519  | -1,344488 | <b>-0,5319845</b> | 951  | 1598 | <b>1274,5</b> |
| TUBGCP4  | -1,081594 | 0,017926  | <b>-0,531834</b>  | 1722 | 2102 | <b>1912</b>   |
| C6orf138 | -0,387545 | -0,675791 | <b>-0,531668</b>  | 1575 | 1704 | <b>1639,5</b> |
| MYOM2    | -1,366265 | 0,302952  | <b>-0,5316565</b> | 1611 | 1984 | <b>1797,5</b> |
| C6orf105 | -0,291285 | -0,771922 | <b>-0,5316035</b> | 1317 | 1903 | <b>1610</b>   |
| C15orf39 | -0,531543 | NaN       | <b>-0,531543</b>  | 1611 | NaN  | <b>1611</b>   |
| IPO8     | -0,544681 | -0,517849 | <b>-0,531265</b>  | 1790 | 2082 | <b>1936</b>   |
| ANGPTL1  | -1,129071 | 0,067241  | <b>-0,530915</b>  | 1783 | 2098 | <b>1940,5</b> |
| FDX1     | -0,538386 | -0,523403 | <b>-0,5308945</b> | 1593 | 2294 | <b>1943,5</b> |
| PKP1     | -1,159521 | 0,09786   | <b>-0,5308305</b> | 1397 | 1721 | <b>1559</b>   |
| ACAP1    | -0,530726 | NaN       | <b>-0,530726</b>  | 1702 | NaN  | <b>1702</b>   |
| H1FO     | NaN       | -0,530611 | <b>-0,530611</b>  | NaN  | 2979 | <b>2979</b>   |
| FAM71D   | -0,284502 | -0,776628 | <b>-0,530565</b>  | 1783 | 1998 | <b>1890,5</b> |
| BEX4     | -0,486133 | -0,574807 | <b>-0,53047</b>   | 1814 | 2155 | <b>1984,5</b> |
| QARS     | 0,5768    | -1,636709 | <b>-0,5299545</b> | 1562 | 1967 | <b>1764,5</b> |
| GRPEL1   | -0,529769 | NaN       | <b>-0,529769</b>  | 1563 | NaN  | <b>1563</b>   |
| CPB2     | -0,752538 | -0,306939 | <b>-0,5297385</b> | 2209 | 2368 | <b>2288,5</b> |

|          |           |           |                   |      |      |               |
|----------|-----------|-----------|-------------------|------|------|---------------|
| BEST2    | -0,215126 | -0,844281 | <b>-0,5297035</b> | 2015 | 2216 | <b>2115,5</b> |
| ESRRG    | -0,300073 | -0,759188 | <b>-0,5296305</b> | 1024 | 1144 | <b>1084</b>   |
| MAN1C1   | -1,299536 | 0,240314  | <b>-0,529611</b>  | 1380 | 1817 | <b>1598,5</b> |
| EGFL7    | -1,140217 | 0,081192  | <b>-0,5295125</b> | 1755 | 1674 | <b>1714,5</b> |
| CRLF3    | -0,301564 | -0,757283 | <b>-0,5294235</b> | 1262 | 1427 | <b>1344,5</b> |
| MRPL4    | -0,458451 | -0,600142 | <b>-0,5292965</b> | 1722 | 1727 | <b>1724,5</b> |
| FAM65B   | 0,030011  | -1,088524 | <b>-0,5292565</b> | 1762 | 2155 | <b>1958,5</b> |
| RHOA     | -0,502361 | -0,555016 | <b>-0,5286885</b> | 1693 | 1686 | <b>1689,5</b> |
| ERI2     | -0,528629 | NaN       | <b>-0,528629</b>  | 1410 | NaN  | <b>1410</b>   |
| PSMA3    | -0,824788 | -0,232257 | <b>-0,5285225</b> | 1013 | 1357 | <b>1185</b>   |
| DGAT2    | -0,066115 | -0,990059 | <b>-0,528087</b>  | 1008 | 1475 | <b>1241,5</b> |
| MCRS1    | -0,554207 | -0,501462 | <b>-0,5278345</b> | 1278 | 1968 | <b>1623</b>   |
| SNAPC3   | -0,574161 | -0,480841 | <b>-0,527501</b>  | 1552 | 2221 | <b>1886,5</b> |
| IL36G    | -0,438719 | -0,615898 | <b>-0,5273085</b> | 1494 | 2086 | <b>1790</b>   |
| C8orf45  | -0,527306 | NaN       | <b>-0,527306</b>  | 1811 | NaN  | <b>1811</b>   |
| ATXN2    | -1,267411 | 0,21358   | <b>-0,5269155</b> | 1231 | 2525 | <b>1878</b>   |
| OR8K1    | -0,400971 | -0,652472 | <b>-0,5267215</b> | 2108 | 2371 | <b>2239,5</b> |
| PPIC     | 0,11111   | -1,164535 | <b>-0,5267125</b> | 1412 | 1877 | <b>1644,5</b> |
| FYB      | -0,259921 | -0,793489 | <b>-0,526705</b>  | 1488 | 2268 | <b>1878</b>   |
| CCNF     | -0,658311 | -0,394525 | <b>-0,526418</b>  | 1371 | 2727 | <b>2049</b>   |
| CASP1    | -0,592628 | -0,460149 | <b>-0,5263885</b> | 2122 | 2365 | <b>2243,5</b> |
| POMGNT1  | -0,942551 | -0,110041 | <b>-0,526296</b>  | 1799 | 1881 | <b>1840</b>   |
| ABCB1    | -1,131247 | 0,078896  | <b>-0,5261755</b> | 1066 | 1665 | <b>1365,5</b> |
| INTS1    | 0,048066  | -1,100251 | <b>-0,5260925</b> | 1013 | 1557 | <b>1285</b>   |
| C12orf61 | -0,283884 | -0,768086 | <b>-0,525985</b>  | 1579 | 1981 | <b>1780</b>   |
| MYO10    | -0,457325 | -0,594586 | <b>-0,5259555</b> | 1961 | 2483 | <b>2222</b>   |
| OR52N5   | -0,864128 | -0,187331 | <b>-0,5257295</b> | 1775 | 1909 | <b>1842</b>   |
| OR5K4    | -0,446839 | -0,604482 | <b>-0,5256605</b> | 1343 | 1920 | <b>1631,5</b> |
| PHACTR1  | -0,847512 | -0,203049 | <b>-0,5252805</b> | 1768 | 2000 | <b>1884</b>   |
| RFX2     | -0,228824 | -0,821658 | <b>-0,525241</b>  | 1198 | 2237 | <b>1717,5</b> |
| C6orf165 | -1,777643 | 0,729331  | <b>-0,524156</b>  | 1171 | 1370 | <b>1270,5</b> |
| GRTP1    | 0,140614  | -1,187151 | <b>-0,5232685</b> | 1395 | 1851 | <b>1623</b>   |
| NFKBIE   | NaN       | -0,523155 | <b>-0,523155</b>  | NaN  | 2026 | <b>2026</b>   |
| MICALL1  | -0,966503 | -0,079341 | <b>-0,522922</b>  | 1616 | 1853 | <b>1734,5</b> |

|          |           |           |                   |      |      |               |
|----------|-----------|-----------|-------------------|------|------|---------------|
| PMPCB    | -1,163711 | 0,118016  | <b>-0,5228475</b> | 1976 | 2361 | <b>2168,5</b> |
| PATZ1    | -0,122503 | -0,923024 | <b>-0,5227635</b> | 1875 | 2750 | <b>2312,5</b> |
| CD84     | -0,522162 | NaN       | <b>-0,522162</b>  | 1356 | NaN  | <b>1356</b>   |
| UBE2W    | -0,490076 | -0,553245 | <b>-0,5216605</b> | 1472 | 2714 | <b>2093</b>   |
| NUBPL    | -1,148907 | 0,105794  | <b>-0,5215565</b> | 1691 | 2049 | <b>1870</b>   |
| LCN9     | -0,104026 | -0,939053 | <b>-0,5215395</b> | 1431 | 1654 | <b>1542,5</b> |
| DDX3Y    | -0,372728 | -0,669095 | <b>-0,5209115</b> | 1193 | 1263 | <b>1228</b>   |
| TDRD6    | -0,541306 | -0,49978  | <b>-0,520543</b>  | 1888 | 2106 | <b>1997</b>   |
| SMTNL2   | 0,534717  | -1,575295 | <b>-0,520289</b>  | 1382 | 1764 | <b>1573</b>   |
| PFN3     | 0,05489   | -1,095291 | <b>-0,5202005</b> | 1769 | 1999 | <b>1884</b>   |
| CFP      | -0,51981  | NaN       | <b>-0,51981</b>   | 1785 | NaN  | <b>1785</b>   |
| PIP4K2B  | 0,12986   | -1,169371 | <b>-0,5197555</b> | 1613 | 2246 | <b>1929,5</b> |
| RORB     | -0,994606 | -0,044841 | <b>-0,5197235</b> | 1829 | 2769 | <b>2299</b>   |
| PARD6G   | -0,519598 | NaN       | <b>-0,519598</b>  | 1502 | NaN  | <b>1502</b>   |
| SNW1     | 0,084194  | -1,123229 | <b>-0,5195175</b> | 1495 | 1881 | <b>1688</b>   |
| LHFPL1   | -0,124597 | -0,914301 | <b>-0,519449</b>  | 1825 | 2126 | <b>1975,5</b> |
| LGALS2   | -0,376253 | -0,662269 | <b>-0,519261</b>  | 1815 | 2085 | <b>1950</b>   |
| RB1CC1   | -0,470766 | -0,567639 | <b>-0,5192025</b> | 1603 | 2052 | <b>1827,5</b> |
| CBX3     | -0,650901 | -0,387387 | <b>-0,519144</b>  | 1448 | 1382 | <b>1415</b>   |
| TLR9     | -0,067199 | -0,970809 | <b>-0,519004</b>  | 1295 | 2033 | <b>1664</b>   |
| FREM1    | -0,518782 | NaN       | <b>-0,518782</b>  | 1754 | NaN  | <b>1754</b>   |
| NODAL    | -0,144381 | -0,893034 | <b>-0,5187075</b> | 1229 | 2053 | <b>1641</b>   |
| CYP3A4   | -0,258465 | -0,77844  | <b>-0,5184525</b> | 1571 | 3070 | <b>2320,5</b> |
| PRRC1    | -0,851766 | -0,184403 | <b>-0,5180845</b> | 1551 | 2152 | <b>1851,5</b> |
| SCGB3A1  | -0,120982 | -0,915044 | <b>-0,518013</b>  | 1859 | 2066 | <b>1962,5</b> |
| FBP1     | -0,360668 | -0,675322 | <b>-0,517995</b>  | 1553 | 2315 | <b>1934</b>   |
| EFR3A    | -0,236043 | -0,799563 | <b>-0,517803</b>  | 2314 | 1879 | <b>2096,5</b> |
| NDUFB6   | -0,671439 | -0,364143 | <b>-0,517791</b>  | 1840 | 2026 | <b>1933</b>   |
| POLA1    | -0,968596 | -0,066902 | <b>-0,517749</b>  | 1190 | 1687 | <b>1438,5</b> |
| TBCC     | -0,517444 | NaN       | <b>-0,517444</b>  | 1673 | NaN  | <b>1673</b>   |
| NUSAP1   | -1,017275 | -0,016942 | <b>-0,5171085</b> | 1147 | 1412 | <b>1279,5</b> |
| AGR2     | 0,181073  | -1,215171 | <b>-0,517049</b>  | 1616 | 1861 | <b>1738,5</b> |
| OPRD1    | -0,516803 | NaN       | <b>-0,516803</b>  | 1695 | NaN  | <b>1695</b>   |
| TMEM132D | -0,516656 | NaN       | <b>-0,516656</b>  | 1582 | NaN  | <b>1582</b>   |

|          |           |           |                   |      |      |               |
|----------|-----------|-----------|-------------------|------|------|---------------|
| KCNK13   | -0,777918 | -0,254704 | <b>-0,516311</b>  | 1946 | 2154 | <b>2050</b>   |
| TNFAIP2  | -0,61172  | -0,420885 | <b>-0,5163025</b> | 1565 | 1975 | <b>1770</b>   |
| PRDX6    | -0,843731 | -0,188874 | <b>-0,5163025</b> | 1804 | 2288 | <b>2046</b>   |
| METTL22  | -0,343826 | -0,688737 | <b>-0,5162815</b> | 1570 | 1925 | <b>1747,5</b> |
| CD163L1  | -0,780223 | -0,252332 | <b>-0,5162775</b> | 1659 | 2340 | <b>1999,5</b> |
| FLVCR1   | 0,004438  | -1,035775 | <b>-0,5156685</b> | 2133 | 1954 | <b>2043,5</b> |
| WDR48    | -0,670419 | -0,360827 | <b>-0,515623</b>  | 1490 | 1844 | <b>1667</b>   |
| OR1F1    | -0,052992 | -0,978003 | <b>-0,5154975</b> | 1320 | 1850 | <b>1585</b>   |
| C15orf32 | -0,306044 | -0,72493  | <b>-0,515487</b>  | 1642 | 2663 | <b>2152,5</b> |
| RAVER2   | -0,328511 | -0,702299 | <b>-0,515405</b>  | 1883 | 2834 | <b>2358,5</b> |
| MAGOH    | -0,515237 | NaN       | <b>-0,515237</b>  | 1591 | NaN  | <b>1591</b>   |
| CEP152   | -0,515105 | NaN       | <b>-0,515105</b>  | 1954 | NaN  | <b>1954</b>   |
| SCN2B    | -0,603815 | -0,426219 | <b>-0,515017</b>  | 1394 | 1996 | <b>1695</b>   |
| IKZF3    | -0,140071 | -0,889389 | <b>-0,51473</b>   | 2132 | 3002 | <b>2567</b>   |
| SFTPD    | -0,331142 | -0,697964 | <b>-0,514553</b>  | 1619 | 2179 | <b>1899</b>   |
| CLPTM1   | -0,465533 | -0,563321 | <b>-0,514427</b>  | 1917 | 2221 | <b>2069</b>   |
| EIF2B3   | -0,942647 | -0,086047 | <b>-0,514347</b>  | 1128 | 1711 | <b>1419,5</b> |
| IFIT1    | -0,514258 | NaN       | <b>-0,514258</b>  | 1922 | NaN  | <b>1922</b>   |
| DOT1L    | -0,811623 | -0,216406 | <b>-0,5140145</b> | 2018 | 2323 | <b>2170,5</b> |
| IFIT1B   | -0,473738 | -0,554109 | <b>-0,5139235</b> | 1825 | 2416 | <b>2120,5</b> |
| XPO4     | -1,153309 | 0,125563  | <b>-0,513873</b>  | 1048 | 1632 | <b>1340</b>   |
| SERPINF1 | -0,614691 | -0,413032 | <b>-0,5138615</b> | 1883 | 2202 | <b>2042,5</b> |
| EIF2S1   | -0,45991  | -0,56727  | <b>-0,51359</b>   | 1810 | 2178 | <b>1994</b>   |
| GPR160   | -0,513428 | NaN       | <b>-0,513428</b>  | 1222 | NaN  | <b>1222</b>   |
| SNAPC2   | -0,697893 | -0,328855 | <b>-0,513374</b>  | 1772 | 1701 | <b>1736,5</b> |
| USP4     | -0,905093 | -0,121459 | <b>-0,513276</b>  | 1254 | 2324 | <b>1789</b>   |
| DYNLRB1  | -0,555834 | -0,470499 | <b>-0,5131665</b> | 1338 | 1956 | <b>1647</b>   |
| OTX1     | -1,031229 | 0,005032  | <b>-0,5130985</b> | 1544 | 1698 | <b>1621</b>   |
| TSPAN16  | -0,259765 | -0,766357 | <b>-0,513061</b>  | 1139 | 1781 | <b>1460</b>   |
| PRSS21   | 0,516191  | -1,542206 | <b>-0,5130075</b> | 1736 | 2369 | <b>2052,5</b> |
| GLUD2    | 0,02077   | -1,046643 | <b>-0,5129365</b> | 1978 | 1982 | <b>1980</b>   |
| TAGLN2   | -0,441522 | -0,58433  | <b>-0,512926</b>  | 1821 | 1889 | <b>1855</b>   |
| AQP8     | -0,26003  | -0,765746 | <b>-0,512888</b>  | 1804 | 1939 | <b>1871,5</b> |
| DBF4     | -0,190631 | -0,833925 | <b>-0,512278</b>  | 1795 | 1527 | <b>1661</b>   |

|         |           |           |                   |      |      |               |
|---------|-----------|-----------|-------------------|------|------|---------------|
| MAGEA4  | -0,729629 | -0,29472  | <b>-0,5121745</b> | 1743 | 2038 | <b>1890,5</b> |
| PTPN13  | -0,670628 | -0,353694 | <b>-0,512161</b>  | 1399 | 2123 | <b>1761</b>   |
| NUP214  | -0,731973 | -0,291448 | <b>-0,5117105</b> | 1585 | 2205 | <b>1895</b>   |
| SNCAIP  | 0,000775  | -1,023487 | <b>-0,511356</b>  | 1818 | 1666 | <b>1742</b>   |
| CACNA1D | -0,094103 | -0,928499 | <b>-0,511301</b>  | 1761 | 2495 | <b>2128</b>   |
| MMP20   | -1,307135 | 0,284674  | <b>-0,5112305</b> | 1441 | 1696 | <b>1568,5</b> |
| SNTG2   | -0,54823  | -0,4741   | <b>-0,511165</b>  | 1417 | 2364 | <b>1890,5</b> |
| UBXN11  | -1,022122 | -0,000165 | <b>-0,5111435</b> | 1368 | 1974 | <b>1671</b>   |
| PNPLA1  | -0,544065 | -0,478147 | <b>-0,511106</b>  | 1588 | 2498 | <b>2043</b>   |
| MYT1L   | -0,400977 | -0,620729 | <b>-0,510853</b>  | 1761 | 2043 | <b>1902</b>   |
| KCNJ1   | -0,870489 | -0,150397 | <b>-0,510443</b>  | 1317 | 2491 | <b>1904</b>   |
| SOX9    | -1,168741 | 0,148204  | <b>-0,5102685</b> | 1301 | 1699 | <b>1500</b>   |
| GSPT1   | -0,284097 | -0,736437 | <b>-0,510267</b>  | 1590 | 1900 | <b>1745</b>   |
| SARDH   | -0,644573 | -0,374561 | <b>-0,509567</b>  | 1583 | 2448 | <b>2015,5</b> |
| TOMM22  | -1,18745  | 0,168352  | <b>-0,509549</b>  | 1649 | 1880 | <b>1764,5</b> |
| MYADM   | -0,632937 | -0,386095 | <b>-0,509516</b>  | 1675 | 2235 | <b>1955</b>   |
| NUB1    | -0,50939  | NaN       | <b>-0,50939</b>   | 1657 | NaN  | <b>1657</b>   |
| SLC1A7  | -1,192586 | 0,174064  | <b>-0,509261</b>  | 2319 | 2756 | <b>2537,5</b> |
| ATP1B4  | -0,713303 | -0,305181 | <b>-0,509242</b>  | 1140 | 1623 | <b>1381,5</b> |
| AVP     | -0,759863 | -0,258215 | <b>-0,509039</b>  | 743  | 1610 | <b>1176,5</b> |
| KCNH5   | -0,505611 | -0,51231  | <b>-0,5089605</b> | 1083 | 2054 | <b>1568,5</b> |
| METRNL  | -0,508894 | NaN       | <b>-0,508894</b>  | 1716 | NaN  | <b>1716</b>   |
| TMEM220 | -1,014773 | -0,002137 | <b>-0,508455</b>  | 1758 | 1949 | <b>1853,5</b> |
| BRI3BP  | -0,50823  | NaN       | <b>-0,50823</b>   | 952  | NaN  | <b>952</b>    |
| PRSS50  | 0,340812  | -1,357055 | <b>-0,5081215</b> | 948  | 1657 | <b>1302,5</b> |
| ARPP19  | -0,199435 | -0,816699 | <b>-0,508067</b>  | 1263 | 1908 | <b>1585,5</b> |
| HES2    | -0,003323 | -1,012188 | <b>-0,5077555</b> | 1624 | 2753 | <b>2188,5</b> |
| VGLL2   | 0,557497  | -1,572796 | <b>-0,5076495</b> | 1156 | 1493 | <b>1324,5</b> |
| OXR1    | -0,49525  | -0,51997  | <b>-0,50761</b>   | 1900 | 2672 | <b>2286</b>   |
| ADPRH   | -0,027558 | -0,987145 | <b>-0,5073515</b> | 1382 | 1633 | <b>1507,5</b> |
| CETN3   | -0,507302 | NaN       | <b>-0,507302</b>  | 1683 | NaN  | <b>1683</b>   |
| KLC4    | -0,395042 | -0,619528 | <b>-0,507285</b>  | 1841 | 2643 | <b>2242</b>   |
| METTL8  | -0,375395 | -0,638948 | <b>-0,5071715</b> | 1217 | 1614 | <b>1415,5</b> |
| ANGPTL7 | -0,248315 | -0,765961 | <b>-0,507138</b>  | 1398 | 2136 | <b>1767</b>   |

|          |           |           |                   |      |      |               |
|----------|-----------|-----------|-------------------|------|------|---------------|
| IRAK3    | 0,315364  | -1,329404 | <b>-0,50702</b>   | 1592 | 2126 | <b>1859</b>   |
| GCLC     | -0,726516 | -0,287485 | <b>-0,5070005</b> | 1610 | 2253 | <b>1931,5</b> |
| C5AR1    | -0,506819 | NaN       | <b>-0,506819</b>  | 1459 | NaN  | <b>1459</b>   |
| THEG     | -0,366789 | -0,646019 | <b>-0,506404</b>  | 1054 | 1831 | <b>1442,5</b> |
| KRBA2    | -0,506253 | NaN       | <b>-0,506253</b>  | 1701 | NaN  | <b>1701</b>   |
| C14orf45 | -0,581536 | -0,430353 | <b>-0,5059445</b> | 1923 | 2253 | <b>2088</b>   |
| IFT52    | -0,505791 | NaN       | <b>-0,505791</b>  | 1851 | NaN  | <b>1851</b>   |
| DLX5     | -0,416237 | -0,594943 | <b>-0,50559</b>   | 1690 | 1834 | <b>1762</b>   |
| COG5     | -1,250047 | 0,239642  | <b>-0,5052025</b> | 1987 | 1658 | <b>1822,5</b> |
| LPAR5    | -0,505186 | NaN       | <b>-0,505186</b>  | 811  | NaN  | <b>811</b>    |
| CNTFR    | -0,334577 | -0,675707 | <b>-0,505142</b>  | 1457 | 2244 | <b>1850,5</b> |
| GDNF     | -0,42458  | -0,585331 | <b>-0,5049555</b> | 987  | 1515 | <b>1251</b>   |
| METTL5   | -0,880936 | -0,128136 | <b>-0,504536</b>  | 1571 | 1992 | <b>1781,5</b> |
| CCDC50   | -0,56084  | -0,447708 | <b>-0,504274</b>  | 1665 | 1996 | <b>1830,5</b> |
| FNTA     | -0,219048 | -0,789431 | <b>-0,5042395</b> | 2179 | 2446 | <b>2312,5</b> |
| SERPINA7 | NaN       | -0,503972 | <b>-0,503972</b>  | NaN  | 2965 | <b>2965</b>   |
| FABP4    | -1,293664 | 0,285818  | <b>-0,503923</b>  | 2195 | 2230 | <b>2212,5</b> |
| CXorf21  | -1,049191 | 0,041836  | <b>-0,5036775</b> | 1690 | 1986 | <b>1838</b>   |
| OR52K1   | -1,085462 | 0,078729  | <b>-0,5033665</b> | 1705 | 1614 | <b>1659,5</b> |
| ICAM4    | -0,503299 | NaN       | <b>-0,503299</b>  | 1434 | NaN  | <b>1434</b>   |
| GHR      | -0,13166  | -0,874815 | <b>-0,5032375</b> | 1580 | 1687 | <b>1633,5</b> |
| OR2J2    | 0,146669  | -1,15261  | <b>-0,5029705</b> | 951  | 1697 | <b>1324</b>   |
| NCAPH    | -0,502741 | NaN       | <b>-0,502741</b>  | 1439 | NaN  | <b>1439</b>   |
| GPS2     | -0,798009 | -0,20713  | <b>-0,5025695</b> | 1865 | 2128 | <b>1996,5</b> |
| TOX      | -1,635523 | 0,630395  | <b>-0,502564</b>  | 1427 | 2323 | <b>1875</b>   |
| KCNS1    | -1,439435 | 0,434812  | <b>-0,5023115</b> | 1812 | 2290 | <b>2051</b>   |
| CARD8    | 0,065023  | -1,069556 | <b>-0,5022665</b> | 1796 | 3095 | <b>2445,5</b> |
| CXCR1    | -0,502217 | NaN       | <b>-0,502217</b>  | 1391 | NaN  | <b>1391</b>   |
| DNAJC12  | -0,501965 | NaN       | <b>-0,501965</b>  | 607  | NaN  | <b>607</b>    |
| SORCS1   | -0,501604 | NaN       | <b>-0,501604</b>  | 941  | NaN  | <b>941</b>    |
| SALL3    | -0,329644 | -0,673021 | <b>-0,5013325</b> | 956  | 1909 | <b>1432,5</b> |
| HES5     | -0,638295 | -0,363907 | <b>-0,501101</b>  | 1396 | 1699 | <b>1547,5</b> |
| NAT9     | -0,530284 | -0,471909 | <b>-0,5010965</b> | 1270 | 1091 | <b>1180,5</b> |
| ZCCHC16  | -0,501064 | NaN       | <b>-0,501064</b>  | 1710 | NaN  | <b>1710</b>   |

|           |           |           |                   |      |      |               |
|-----------|-----------|-----------|-------------------|------|------|---------------|
| FABP2     | -0,870586 | -0,131501 | <b>-0,5010435</b> | 1632 | 2260 | <b>1946</b>   |
| CYP4X1    | -0,431878 | -0,568758 | <b>-0,500318</b>  | 1997 | 2234 | <b>2115,5</b> |
| METTL12   | -0,499844 | NaN       | <b>-0,499844</b>  | 1545 | NaN  | <b>1545</b>   |
| ZNF654    | -0,499729 | NaN       | <b>-0,499729</b>  | 1806 | NaN  | <b>1806</b>   |
| SYTL4     | -0,502258 | -0,497072 | <b>-0,499665</b>  | 1655 | 2234 | <b>1944,5</b> |
| SIRT4     | 0,096689  | -1,095939 | <b>-0,499625</b>  | 1716 | 2235 | <b>1975,5</b> |
| KISS1     | -1,263197 | 0,264146  | <b>-0,4995255</b> | 1111 | 1462 | <b>1286,5</b> |
| 12-sept   | -0,502385 | -0,49661  | <b>-0,4994975</b> | 1470 | 2027 | <b>1748,5</b> |
| KCNB1     | -0,537638 | -0,46088  | <b>-0,499259</b>  | 1455 | 2169 | <b>1812</b>   |
| HIST1H2BB | -0,90339  | -0,094926 | <b>-0,499158</b>  | 1607 | 2837 | <b>2222</b>   |
| FAM134A   | -0,124023 | -0,873875 | <b>-0,498949</b>  | 1589 | 2184 | <b>1886,5</b> |
| ALS2CR11  | -0,322624 | -0,674973 | <b>-0,4987985</b> | 1678 | 1849 | <b>1763,5</b> |
| ACO1      | NaN       | -0,498512 | <b>-0,498512</b>  | NaN  | 2023 | <b>2023</b>   |
| S1PR1     | -0,498396 | NaN       | <b>-0,498396</b>  | 1674 | NaN  | <b>1674</b>   |
| YME1L1    | 0,546714  | -1,543496 | <b>-0,498391</b>  | 1232 | 1954 | <b>1593</b>   |
| C1orf216  | -0,285938 | -0,710474 | <b>-0,498206</b>  | 1533 | 2209 | <b>1871</b>   |
| CD180     | -0,580638 | -0,415677 | <b>-0,4981575</b> | 1349 | 2134 | <b>1741,5</b> |
| MYEF2     | -0,709946 | -0,286333 | <b>-0,4981395</b> | 1863 | 1988 | <b>1925,5</b> |
| GSDMC     | -0,657619 | -0,338472 | <b>-0,4980455</b> | 1766 | 2374 | <b>2070</b>   |
| GPHN      | -0,717397 | -0,278692 | <b>-0,4980445</b> | 1541 | 2241 | <b>1891</b>   |
| PAK7      | -0,442132 | -0,553943 | <b>-0,4980375</b> | 1621 | 1791 | <b>1706</b>   |
| HRH2      | -0,497977 | NaN       | <b>-0,497977</b>  | 650  | NaN  | <b>650</b>    |
| ART1      | -0,869789 | -0,125698 | <b>-0,4977435</b> | 1370 | 1887 | <b>1628,5</b> |
| HIST1H1A  | -0,227216 | -0,768214 | <b>-0,497715</b>  | 1770 | 2113 | <b>1941,5</b> |
| SLC12A6   | -0,796379 | -0,198801 | <b>-0,49759</b>   | 1725 | 2806 | <b>2265,5</b> |
| TNK1      | -0,940736 | -0,054433 | <b>-0,4975845</b> | 1935 | 2303 | <b>2119</b>   |
| PDPN      | -0,497573 | NaN       | <b>-0,497573</b>  | 1628 | NaN  | <b>1628</b>   |
| RNASE4    | 0,624288  | -1,619326 | <b>-0,497519</b>  | 1626 | 1864 | <b>1745</b>   |
| CCDC85B   | -0,497234 | NaN       | <b>-0,497234</b>  | 1366 | NaN  | <b>1366</b>   |
| FBXW7     | -0,250613 | -0,743787 | <b>-0,4972</b>    | 1833 | 2574 | <b>2203,5</b> |
| RNF39     | 0,146576  | -1,140959 | <b>-0,4971915</b> | 1653 | 2273 | <b>1963</b>   |
| ACER3     | -1,257635 | 0,263579  | <b>-0,497028</b>  | 2202 | 2316 | <b>2259</b>   |
| GNLY      | -0,496871 | NaN       | <b>-0,496871</b>  | 1649 | NaN  | <b>1649</b>   |
| DOCK10    | -0,155348 | -0,837587 | <b>-0,4964675</b> | 1497 | 2107 | <b>1802</b>   |



|          |           |           |                   |      |      |               |
|----------|-----------|-----------|-------------------|------|------|---------------|
| BANF2    | -0,651191 | -0,341587 | <b>-0,496389</b>  | 2128 | 2406 | <b>2267</b>   |
| RPS6KB2  | -0,613302 | -0,378862 | <b>-0,496082</b>  | 1554 | 2173 | <b>1863,5</b> |
| DHX58    | -0,617356 | -0,374774 | <b>-0,496065</b>  | 1492 | 2404 | <b>1948</b>   |
| SLC35A5  | NaN       | -0,495808 | <b>-0,495808</b>  | NaN  | 1612 | <b>1612</b>   |
| TIMM8B   | -0,73089  | -0,260418 | <b>-0,495654</b>  | 1621 | 1852 | <b>1736,5</b> |
| UBE2E1   | -0,044635 | -0,946343 | <b>-0,495489</b>  | 1820 | 2268 | <b>2044</b>   |
| SPANXN2  | -0,451651 | -0,539245 | <b>-0,495448</b>  | 1680 | 2322 | <b>2001</b>   |
| ZBBX     | -0,235184 | -0,75568  | <b>-0,495432</b>  | 1982 | 2082 | <b>2032</b>   |
| IGF2R    | 1,07938   | -2,070071 | <b>-0,4953455</b> | 2143 | 2198 | <b>2170,5</b> |
| C17orf56 | -0,495063 | NaN       | <b>-0,495063</b>  | 1780 | NaN  | <b>1780</b>   |
| LIF      | 0,173215  | -1,162918 | <b>-0,4948515</b> | 1128 | 1925 | <b>1526,5</b> |
| RGS4     | -0,704672 | -0,284771 | <b>-0,4947215</b> | 840  | 1842 | <b>1341</b>   |
| PRKCI    | -0,765235 | -0,223558 | <b>-0,4943965</b> | 1397 | 1922 | <b>1659,5</b> |
| C3orf70  | -0,644873 | -0,343219 | <b>-0,494046</b>  | 1284 | 1920 | <b>1602</b>   |
| FAM100B  | -0,49401  | NaN       | <b>-0,49401</b>   | 1304 | NaN  | <b>1304</b>   |
| C10orf27 | -0,377389 | -0,61043  | <b>-0,4939095</b> | 1757 | 2274 | <b>2015,5</b> |
| CSRNP1   | -0,869697 | -0,11809  | <b>-0,4938935</b> | 1467 | 1361 | <b>1414</b>   |
| DEFA4    | -0,077352 | -0,910256 | <b>-0,493804</b>  | 1436 | 1734 | <b>1585</b>   |
| ECSCR    | -0,609149 | -0,378191 | <b>-0,49367</b>   | 1736 | 1949 | <b>1842,5</b> |
| GTPBP2   | -0,333069 | -0,654119 | <b>-0,493594</b>  | 2036 | 2109 | <b>2072,5</b> |
| IRGC     | -0,411905 | -0,575128 | <b>-0,4935165</b> | 1741 | 2055 | <b>1898</b>   |
| SYNJ2    | -0,230964 | -0,755804 | <b>-0,493384</b>  | 1866 | 2502 | <b>2184</b>   |
| WDR85    | -0,493212 | NaN       | <b>-0,493212</b>  | 1294 | NaN  | <b>1294</b>   |
| SV2C     | -0,492887 | NaN       | <b>-0,492887</b>  | 1768 | NaN  | <b>1768</b>   |
| ARMCX1   | -0,492864 | NaN       | <b>-0,492864</b>  | 1685 | NaN  | <b>1685</b>   |
| LDHC     | -0,753535 | -0,231391 | <b>-0,492463</b>  | 986  | 1916 | <b>1451</b>   |
| ANAPC10  | -0,410792 | -0,573421 | <b>-0,4921065</b> | 1971 | 2073 | <b>2022</b>   |
| LIMK2    | 0,761303  | -1,745494 | <b>-0,4920955</b> | 1775 | 2434 | <b>2104,5</b> |
| RARS2    | -0,645487 | -0,33866  | <b>-0,4920735</b> | 1946 | 2309 | <b>2127,5</b> |
| KIF2B    | -0,460233 | -0,523506 | <b>-0,4918695</b> | 1596 | 2306 | <b>1951</b>   |
| MRPS5    | -0,752215 | -0,231326 | <b>-0,4917705</b> | 1585 | 2517 | <b>2051</b>   |
| TBX6     | -0,147792 | -0,835596 | <b>-0,491694</b>  | 1207 | 1938 | <b>1572,5</b> |
| N4BP2    | -1,107929 | 0,124748  | <b>-0,4915905</b> | 1534 | 2212 | <b>1873</b>   |
| BTA1     | 0,057163  | -1,040312 | <b>-0,4915745</b> | 1933 | 2195 | <b>2064</b>   |

|          |           |           |                   |      |      |               |
|----------|-----------|-----------|-------------------|------|------|---------------|
| SLC28A3  | -0,068244 | -0,914691 | <b>-0,4914675</b> | 1412 | 1482 | <b>1447</b>   |
| ZG16B    | -0,618283 | -0,364495 | <b>-0,491389</b>  | 1187 | 1493 | <b>1340</b>   |
| CCNH     | -0,873072 | -0,109157 | <b>-0,4911145</b> | 1703 | 1845 | <b>1774</b>   |
| FTO      | -0,934005 | -0,048037 | <b>-0,491021</b>  | 2188 | 2544 | <b>2366</b>   |
| MYO1F    | 0,539464  | -1,521395 | <b>-0,4909655</b> | 2114 | 2906 | <b>2510</b>   |
| TPH1     | NaN       | -0,490872 | <b>-0,490872</b>  | NaN  | 2253 | <b>2253</b>   |
| KRTAP4-2 | -1,059553 | 0,077932  | <b>-0,4908105</b> | 1924 | 1393 | <b>1658,5</b> |
| DYRK1A   | -0,047125 | -0,93446  | <b>-0,4907925</b> | 1578 | 2206 | <b>1892</b>   |
| SLC6A18  | -0,985338 | 0,003899  | <b>-0,4907195</b> | 1941 | 1977 | <b>1959</b>   |
| ATR      | -0,030494 | -0,950669 | <b>-0,4905815</b> | 1483 | 2252 | <b>1867,5</b> |
| NOX4     | -0,771709 | -0,209249 | <b>-0,490479</b>  | 2158 | 2638 | <b>2398</b>   |
| FCRL2    | -0,088811 | -0,891501 | <b>-0,490156</b>  | 2129 | 2098 | <b>2113,5</b> |
| RORC     | -0,356336 | -0,623661 | <b>-0,4899985</b> | 1205 | 1416 | <b>1310,5</b> |
| P2RX4    | 0,701124  | -1,680772 | <b>-0,489824</b>  | 1611 | 2982 | <b>2296,5</b> |
| FRMD3    | -0,051176 | -0,928413 | <b>-0,4897945</b> | 1609 | 1771 | <b>1690</b>   |
| ZCRB1    | -0,489769 | NaN       | <b>-0,489769</b>  | 1837 | NaN  | <b>1837</b>   |
| TSC22D1  | -0,158935 | -0,820554 | <b>-0,4897445</b> | 1576 | 3103 | <b>2339,5</b> |
| ZNF564   | -0,088526 | -0,890831 | <b>-0,4896785</b> | 1841 | 2896 | <b>2368,5</b> |
| GREM2    | -0,087808 | -0,89109  | <b>-0,489449</b>  | 1557 | 1723 | <b>1640</b>   |
| SEMA3F   | -0,543693 | -0,43482  | <b>-0,4892565</b> | 1279 | 1629 | <b>1454</b>   |
| SEMA7A   | -1,08232  | 0,10428   | <b>-0,48902</b>   | 1681 | 1171 | <b>1426</b>   |
| OLFML2B  | -0,573197 | -0,404812 | <b>-0,4890045</b> | 1827 | 1970 | <b>1898,5</b> |
| GUCY2C   | -0,055285 | -0,922609 | <b>-0,488947</b>  | 1560 | 2699 | <b>2129,5</b> |
| SPRED3   | -0,655656 | -0,32214  | <b>-0,488898</b>  | 1726 | 2051 | <b>1888,5</b> |
| C3AR1    | -0,48882  | NaN       | <b>-0,48882</b>   | 1609 | NaN  | <b>1609</b>   |
| RAB33B   | NaN       | -0,488407 | <b>-0,488407</b>  | NaN  | 1710 | <b>1710</b>   |
| TCF3     | -0,788783 | -0,187625 | <b>-0,488204</b>  | 1426 | 2222 | <b>1824</b>   |
| CPA5     | -1,508856 | 0,532577  | <b>-0,4881395</b> | 2384 | 2698 | <b>2541</b>   |
| NXPH2    | -0,755733 | -0,220354 | <b>-0,4880435</b> | 1241 | 1908 | <b>1574,5</b> |
| HEMGN    | 0,115919  | -1,092004 | <b>-0,4880425</b> | 1443 | 2394 | <b>1918,5</b> |
| UBE2H    | -0,046669 | -0,929187 | <b>-0,487928</b>  | 1846 | 2848 | <b>2347</b>   |
| MUC16    | -0,853293 | -0,122465 | <b>-0,487879</b>  | 1567 | 1146 | <b>1356,5</b> |
| SLCO1A2  | -0,263496 | -0,712117 | <b>-0,4878065</b> | 1502 | 1866 | <b>1684</b>   |
| LCE1E    | -0,065574 | -0,90984  | <b>-0,487707</b>  | 1712 | 3193 | <b>2452,5</b> |

|          |           |           |                   |      |      |               |
|----------|-----------|-----------|-------------------|------|------|---------------|
| OAZ1     | 0,301301  | -1,276454 | <b>-0,4875765</b> | 1031 | 2000 | <b>1515,5</b> |
| ALG12    | -0,535798 | -0,439308 | <b>-0,487553</b>  | 1348 | 1568 | <b>1458</b>   |
| UBE2T    | -0,579269 | -0,395811 | <b>-0,48754</b>   | 1311 | 2017 | <b>1664</b>   |
| CAV2     | -0,487468 | NaN       | <b>-0,487468</b>  | 1886 | NaN  | <b>1886</b>   |
| BCL2A1   | -1,225444 | 0,251237  | <b>-0,4871035</b> | 1520 | 1942 | <b>1731</b>   |
| MAB21L2  | -0,686115 | -0,28788  | <b>-0,4869975</b> | 1008 | 1299 | <b>1153,5</b> |
| TTLL4    | -0,212326 | -0,761284 | <b>-0,486805</b>  | 1992 | 2665 | <b>2328,5</b> |
| COX5B    | -0,420343 | -0,552691 | <b>-0,486517</b>  | 1974 | 2770 | <b>2372</b>   |
| JMJD1C   | -0,938269 | -0,034265 | <b>-0,486267</b>  | 1659 | 2241 | <b>1950</b>   |
| C11orf73 | -1,053169 | 0,080641  | <b>-0,486264</b>  | 1580 | 2142 | <b>1861</b>   |
| CLDN6    | 0,275252  | -1,246555 | <b>-0,4856515</b> | 829  | 1138 | <b>983,5</b>  |
| PODXL2   | -0,016793 | -0,953979 | <b>-0,485386</b>  | 1326 | 1699 | <b>1512,5</b> |
| OR2W3    | -0,485311 | NaN       | <b>-0,485311</b>  | 1286 | NaN  | <b>1286</b>   |
| PSMB7    | -0,448946 | -0,520321 | <b>-0,4846335</b> | 1241 | 1874 | <b>1557,5</b> |
| MED29    | -0,484536 | NaN       | <b>-0,484536</b>  | 1741 | NaN  | <b>1741</b>   |
| NPAS4    | -0,397555 | -0,571368 | <b>-0,4844615</b> | 2223 | 2213 | <b>2218</b>   |
| ZNF253   | -1,476892 | 0,508055  | <b>-0,4844185</b> | 1661 | 2880 | <b>2270,5</b> |
| SUGT1    | -0,605522 | -0,362664 | <b>-0,484093</b>  | 1342 | 2317 | <b>1829,5</b> |
| NKG7     | -0,835058 | -0,133054 | <b>-0,484056</b>  | 1479 | 1832 | <b>1655,5</b> |
| ITGBL1   | -0,484052 | NaN       | <b>-0,484052</b>  | 2231 | NaN  | <b>2231</b>   |
| C9orf86  | -0,251967 | -0,715953 | <b>-0,48396</b>   | 1414 | 1792 | <b>1603</b>   |
| IZUMO2   | -0,483928 | NaN       | <b>-0,483928</b>  | 1361 | NaN  | <b>1361</b>   |
| TMEM105  | -0,116538 | -0,850807 | <b>-0,4836725</b> | 1398 | 1537 | <b>1467,5</b> |
| GPR101   | -0,483608 | NaN       | <b>-0,483608</b>  | 1192 | NaN  | <b>1192</b>   |
| MPDU1    | -0,628222 | -0,338863 | <b>-0,4835425</b> | 1270 | 1939 | <b>1604,5</b> |
| ACSBG1   | -0,679814 | -0,287057 | <b>-0,4834355</b> | 2034 | 2664 | <b>2349</b>   |
| MAFG     | -0,868147 | -0,098162 | <b>-0,4831545</b> | 1514 | 1767 | <b>1640,5</b> |
| GRAMD1A  | -0,834499 | -0,13166  | <b>-0,4830795</b> | 1515 | 1771 | <b>1643</b>   |
| SLFN5    | -0,853401 | -0,11274  | <b>-0,4830705</b> | 1662 | 1759 | <b>1710,5</b> |
| AHCYL2   | -0,287145 | -0,678262 | <b>-0,4827035</b> | 1628 | 2180 | <b>1904</b>   |
| VWC2L    | -0,621497 | -0,343548 | <b>-0,4825225</b> | 1545 | 2828 | <b>2186,5</b> |
| NUPL2    | -0,283076 | -0,681833 | <b>-0,4824545</b> | 1349 | 1666 | <b>1507,5</b> |
| ZNF275   | -0,501532 | -0,46313  | <b>-0,482331</b>  | 1468 | 2204 | <b>1836</b>   |
| CLEC2A   | -0,482238 | NaN       | <b>-0,482238</b>  | 1383 | NaN  | <b>1383</b>   |

|          |           |           |                   |      |      |               |
|----------|-----------|-----------|-------------------|------|------|---------------|
| CHMP2B   | -0,202172 | -0,7622   | <b>-0,482186</b>  | 1571 | 2075 | <b>1823</b>   |
| DDX17    | 0,204884  | -1,169137 | <b>-0,4821265</b> | 1282 | 1651 | <b>1466,5</b> |
| PIK3C2A  | -0,130131 | -0,833708 | <b>-0,4819195</b> | 1598 | 2379 | <b>1988,5</b> |
| OR7A5    | 0,439447  | -1,403134 | <b>-0,4818435</b> | 2011 | 2551 | <b>2281</b>   |
| LAMB2    | -0,542254 | -0,421274 | <b>-0,481764</b>  | 1676 | 2131 | <b>1903,5</b> |
| KLK9     | -0,6057   | -0,35754  | <b>-0,48162</b>   | 1180 | 1786 | <b>1483</b>   |
| EREG     | 0,406964  | -1,370019 | <b>-0,4815275</b> | 1679 | 2742 | <b>2210,5</b> |
| C10orf71 | -0,842518 | -0,120201 | <b>-0,4813595</b> | 1518 | 1653 | <b>1585,5</b> |
| TPST1    | 0,822348  | -1,785037 | <b>-0,4813445</b> | 1568 | 2631 | <b>2099,5</b> |
| SRSF3    | -0,481049 | NaN       | <b>-0,481049</b>  | 778  | NaN  | <b>778</b>    |
| SOCS1    | -0,820337 | -0,141447 | <b>-0,480892</b>  | 1592 | 2385 | <b>1988,5</b> |
| KIAA0247 | 0,554149  | -1,515923 | <b>-0,480887</b>  | 1713 | 1911 | <b>1812</b>   |
| C7orf45  | -0,480859 | NaN       | <b>-0,480859</b>  | 1547 | NaN  | <b>1547</b>   |
| FERMT3   | -0,646657 | -0,314586 | <b>-0,4806215</b> | 1656 | 1978 | <b>1817</b>   |
| THBS1    | -0,175856 | -0,785367 | <b>-0,4806115</b> | 1678 | 2103 | <b>1890,5</b> |
| SLC22A13 | -0,111787 | -0,849345 | <b>-0,480566</b>  | 1177 | 1877 | <b>1527</b>   |
| NFIB     | 0,07299   | -1,032301 | <b>-0,4796555</b> | 1912 | 2457 | <b>2184,5</b> |
| TMEM145  | -0,479491 | NaN       | <b>-0,479491</b>  | 1761 | NaN  | <b>1761</b>   |
| TAS2R42  | -0,539407 | -0,418767 | <b>-0,479087</b>  | 1947 | 1761 | <b>1854</b>   |
| PDGFC    | -0,50355  | -0,454567 | <b>-0,4790585</b> | 1928 | 2202 | <b>2065</b>   |
| EPHA8    | -0,878931 | -0,076936 | <b>-0,4779335</b> | 1857 | 1943 | <b>1900</b>   |
| CXXC4    | -0,477859 | NaN       | <b>-0,477859</b>  | 1367 | NaN  | <b>1367</b>   |
| ARHGAP21 | 0,16579   | -1,121016 | <b>-0,477613</b>  | 1853 | 3031 | <b>2442</b>   |
| ACTL6A   | -0,477978 | -0,477215 | <b>-0,4775965</b> | 702  | 1301 | <b>1001,5</b> |
| DARS2    | -0,337925 | -0,616923 | <b>-0,477424</b>  | 1778 | 3069 | <b>2423,5</b> |
| ZNF792   | -0,744489 | -0,210037 | <b>-0,477263</b>  | 1751 | 1803 | <b>1777</b>   |
| PACSIN1  | 0,81048   | -1,764916 | <b>-0,477218</b>  | 1426 | 2109 | <b>1767,5</b> |
| ADM      | -0,819123 | -0,135107 | <b>-0,477115</b>  | 1180 | 1200 | <b>1190</b>   |
| GPR35    | -0,477028 | NaN       | <b>-0,477028</b>  | 1343 | NaN  | <b>1343</b>   |
| TCP11L2  | -0,54398  | -0,409609 | <b>-0,4767945</b> | 1267 | 1512 | <b>1389,5</b> |
| PARP14   | -0,650438 | -0,302822 | <b>-0,47663</b>   | 1431 | 1990 | <b>1710,5</b> |
| ROBO4    | -0,668401 | -0,284441 | <b>-0,476421</b>  | 1700 | 1792 | <b>1746</b>   |
| ZBTB8A   | -0,476127 | NaN       | <b>-0,476127</b>  | 1622 | NaN  | <b>1622</b>   |
| KRTAP5-8 | -0,606213 | -0,345985 | <b>-0,476099</b>  | 1702 | 2130 | <b>1916</b>   |

|          |           |           |                   |      |      |               |
|----------|-----------|-----------|-------------------|------|------|---------------|
| C21orf63 | -0,788181 | -0,16364  | <b>-0,4759105</b> | 2067 | 2352 | <b>2209,5</b> |
| PNMAL1   | -1,234388 | 0,282721  | <b>-0,4758335</b> | 1644 | 2049 | <b>1846,5</b> |
| SULF1    | -0,267846 | -0,683574 | <b>-0,47571</b>   | 1767 | 2027 | <b>1897</b>   |
| ELOF1    | -0,327615 | -0,623465 | <b>-0,47554</b>   | 988  | 1437 | <b>1212,5</b> |
| TM6SF1   | 0,106822  | -1,056965 | <b>-0,4750715</b> | 1557 | 1449 | <b>1503</b>   |
| FOXD1    | -0,390719 | -0,559243 | <b>-0,474981</b>  | 1599 | 2595 | <b>2097</b>   |
| TXLNA    | -0,391905 | -0,557662 | <b>-0,4747835</b> | 1544 | 2072 | <b>1808</b>   |
| SYT9     | -0,760091 | -0,189419 | <b>-0,474755</b>  | 1471 | 2066 | <b>1768,5</b> |
| SRPK1    | 0,164379  | -1,113683 | <b>-0,474652</b>  | 1809 | 1398 | <b>1603,5</b> |
| ASB5     | 0,468646  | -1,417846 | <b>-0,4746</b>    | 1234 | 2777 | <b>2005,5</b> |
| RAB21    | -0,639007 | -0,309857 | <b>-0,474432</b>  | 1224 | 1813 | <b>1518,5</b> |
| SKIV2L   | -0,251365 | -0,697362 | <b>-0,4743635</b> | 1823 | 1820 | <b>1821,5</b> |
| SERPINH1 | -0,296908 | -0,651473 | <b>-0,4741905</b> | 1280 | 1748 | <b>1514</b>   |
| USP31    | -1,425892 | 0,47767   | <b>-0,474111</b>  | 2147 | 1871 | <b>2009</b>   |
| ARL6IP5  | -0,393498 | -0,554713 | <b>-0,4741055</b> | 1364 | 1535 | <b>1449,5</b> |
| ZFYVE26  | -0,108638 | -0,839399 | <b>-0,4740185</b> | 1490 | 1616 | <b>1553</b>   |
| C9orf47  | -0,671991 | -0,275552 | <b>-0,4737715</b> | 1162 | 1969 | <b>1565,5</b> |
| C6orf97  | -0,473732 | NaN       | <b>-0,473732</b>  | 1449 | NaN  | <b>1449</b>   |
| SH2B1    | -0,071663 | -0,875729 | <b>-0,473696</b>  | 1623 | 2349 | <b>1986</b>   |
| LCE4A    | -0,128843 | -0,817079 | <b>-0,472961</b>  | 1588 | 1857 | <b>1722,5</b> |
| AMOTL2   | -0,11676  | -0,828852 | <b>-0,472806</b>  | 1578 | 1646 | <b>1612</b>   |
| GUSB     | -0,239284 | -0,705238 | <b>-0,472261</b>  | 933  | 1904 | <b>1418,5</b> |
| PLXDC1   | -0,231342 | -0,713055 | <b>-0,4721985</b> | 2400 | 2232 | <b>2316</b>   |
| GUCA1C   | -0,36553  | -0,578844 | <b>-0,472187</b>  | 1346 | 2649 | <b>1997,5</b> |
| POLB     | -0,568198 | -0,375733 | <b>-0,4719655</b> | 1563 | 1549 | <b>1556</b>   |
| NRAP     | -1,176154 | 0,233064  | <b>-0,471545</b>  | 1730 | 2205 | <b>1967,5</b> |
| XPC      | -0,548988 | -0,394032 | <b>-0,47151</b>   | 1204 | 1352 | <b>1278</b>   |
| COMMD6   | -0,471501 | NaN       | <b>-0,471501</b>  | 1499 | NaN  | <b>1499</b>   |
| C19orf47 | 0,45046   | -1,392625 | <b>-0,4710825</b> | 1052 | 2208 | <b>1630</b>   |
| POLR3B   | -0,099364 | -0,842674 | <b>-0,471019</b>  | 1866 | 2035 | <b>1950,5</b> |
| SHD      | 0,095331  | -1,037079 | <b>-0,470874</b>  | 1387 | 1739 | <b>1563</b>   |
| GNB5     | -0,695278 | -0,246181 | <b>-0,4707295</b> | 991  | 1438 | <b>1214,5</b> |
| PIK3R5   | 0,299602  | -1,240914 | <b>-0,470656</b>  | 1209 | 1737 | <b>1473</b>   |
| SAP18    | NaN       | -0,470441 | <b>-0,470441</b>  | NaN  | 2358 | <b>2358</b>   |

|          |           |           |                   |      |      |               |
|----------|-----------|-----------|-------------------|------|------|---------------|
| CHTF8    | -0,470169 | NaN       | <b>-0,470169</b>  | 2034 | NaN  | <b>2034</b>   |
| C12orf52 | -0,61361  | -0,326542 | <b>-0,470076</b>  | 1440 | 1543 | <b>1491,5</b> |
| ERC2     | -0,470027 | NaN       | <b>-0,470027</b>  | 1553 | NaN  | <b>1553</b>   |
| ZFPM2    | -0,097291 | -0,842404 | <b>-0,4698475</b> | 1411 | 1886 | <b>1648,5</b> |
| TRIM26   | -0,902074 | -0,037075 | <b>-0,4695745</b> | 1663 | 2677 | <b>2170</b>   |
| FRMPD4   | -0,469273 | NaN       | <b>-0,469273</b>  | 1918 | NaN  | <b>1918</b>   |
| HEATR4   | -0,356068 | -0,582452 | <b>-0,46926</b>   | 1244 | 1612 | <b>1428</b>   |
| FBXW2    | -0,188644 | -0,749617 | <b>-0,4691305</b> | 1654 | 2660 | <b>2157</b>   |
| TBCB     | -0,671223 | -0,2667   | <b>-0,4689615</b> | 1521 | 2068 | <b>1794,5</b> |
| OR14J1   | -0,151381 | -0,786128 | <b>-0,4687545</b> | 1732 | 2160 | <b>1946</b>   |
| NEIL3    | -1,197489 | 0,260643  | <b>-0,468423</b>  | 2031 | 2393 | <b>2212</b>   |
| ZEB2     | -0,771064 | -0,165597 | <b>-0,4683305</b> | 2163 | 2557 | <b>2360</b>   |
| IPP      | -0,043198 | -0,893407 | <b>-0,4683025</b> | 1834 | 2231 | <b>2032,5</b> |
| CDH18    | -0,310203 | -0,625884 | <b>-0,4680435</b> | 1572 | 1698 | <b>1635</b>   |
| RAB26    | -0,090323 | -0,845503 | <b>-0,467913</b>  | 1420 | 1794 | <b>1607</b>   |
| MED20    | -0,528643 | -0,40687  | <b>-0,4677565</b> | 1648 | 2125 | <b>1886,5</b> |
| GSK3B    | -0,661539 | -0,273688 | <b>-0,4676135</b> | 457  | 1507 | <b>982</b>    |
| CRIM1    | -0,486652 | -0,448416 | <b>-0,467534</b>  | 1639 | 1877 | <b>1758</b>   |
| EHMT2    | NaN       | -0,467394 | <b>-0,467394</b>  | NaN  | 2593 | <b>2593</b>   |
| CWC22    | -0,157879 | -0,776484 | <b>-0,4671815</b> | 584  | 855  | <b>719,5</b>  |
| ZMIZ1    | 0,016751  | -0,950752 | <b>-0,4670005</b> | 1391 | 1611 | <b>1501</b>   |
| VANGL2   | -0,466674 | NaN       | <b>-0,466674</b>  | 1731 | NaN  | <b>1731</b>   |
| OPRK1    | -1,074285 | 0,141604  | <b>-0,4663405</b> | 1858 | 2223 | <b>2040,5</b> |
| CCDC90A  | -0,408597 | -0,524072 | <b>-0,4663345</b> | 2154 | 2271 | <b>2212,5</b> |
| MFAP5    | -0,465984 | NaN       | <b>-0,465984</b>  | 1138 | NaN  | <b>1138</b>   |
| EIF2A    | -0,731245 | -0,200609 | <b>-0,465927</b>  | 1386 | 2061 | <b>1723,5</b> |
| GKN2     | -0,465436 | NaN       | <b>-0,465436</b>  | 1606 | NaN  | <b>1606</b>   |
| CAPN1    | -0,64988  | -0,280654 | <b>-0,465267</b>  | 1277 | 999  | <b>1138</b>   |
| TPM1     | -0,778766 | -0,151658 | <b>-0,465212</b>  | 1310 | 1939 | <b>1624,5</b> |
| MACF1    | -0,393243 | -0,537039 | <b>-0,465141</b>  | 1875 | 2106 | <b>1990,5</b> |
| PROP1    | -0,701519 | -0,228685 | <b>-0,465102</b>  | 1094 | 1055 | <b>1074,5</b> |
| FAM111A  | -0,91652  | -0,012842 | <b>-0,464681</b>  | 2264 | 2304 | <b>2284</b>   |
| TM2D1    | -0,508325 | -0,420618 | <b>-0,4644715</b> | 2020 | 2001 | <b>2010,5</b> |
| NSUN6    | -0,237278 | -0,691017 | <b>-0,4641475</b> | 1752 | 1831 | <b>1791,5</b> |

|           |           |           |                   |      |      |               |
|-----------|-----------|-----------|-------------------|------|------|---------------|
| DENND2D   | -0,6386   | -0,289585 | <b>-0,4640925</b> | 1153 | 1982 | <b>1567,5</b> |
| POLD2     | -0,970174 | 0,042427  | <b>-0,4638735</b> | 1765 | 1725 | <b>1745</b>   |
| CSRNP3    | -0,184008 | -0,743233 | <b>-0,4636205</b> | 1698 | 2044 | <b>1871</b>   |
| SIDT2     | -0,586896 | -0,340305 | <b>-0,4636005</b> | 1402 | 1602 | <b>1502</b>   |
| STMN2     | -0,135063 | -0,791963 | <b>-0,463513</b>  | 1538 | 1590 | <b>1564</b>   |
| CYP2W1    | -0,151249 | -0,775762 | <b>-0,4635055</b> | 963  | 1614 | <b>1288,5</b> |
| HOXC13    | -0,980652 | 0,054198  | <b>-0,463227</b>  | 1780 | 2162 | <b>1971</b>   |
| C1QTNF7   | -0,296922 | -0,629054 | <b>-0,462988</b>  | 900  | 2023 | <b>1461,5</b> |
| SSTR3     | -0,46268  | NaN       | <b>-0,46268</b>   | 1647 | NaN  | <b>1647</b>   |
| IYD       | -0,73261  | -0,192735 | <b>-0,4626725</b> | 1841 | 2483 | <b>2162</b>   |
| MAN2B1    | -0,943131 | 0,017945  | <b>-0,462593</b>  | 1566 | 1806 | <b>1686</b>   |
| MOXD1     | -0,195215 | -0,729961 | <b>-0,462588</b>  | 1309 | 2575 | <b>1942</b>   |
| PPA2      | -0,434518 | -0,490303 | <b>-0,4624105</b> | 1440 | 2424 | <b>1932</b>   |
| MYH10     | -0,652112 | -0,272372 | <b>-0,462242</b>  | 1061 | 1753 | <b>1407</b>   |
| KLHL32    | -0,462221 | NaN       | <b>-0,462221</b>  | 1586 | NaN  | <b>1586</b>   |
| RCHY1     | -0,333448 | -0,590806 | <b>-0,462127</b>  | 1734 | 2279 | <b>2006,5</b> |
| PMAIP1    | -0,461666 | NaN       | <b>-0,461666</b>  | 1400 | NaN  | <b>1400</b>   |
| TMEM213   | 0,09395   | -1,017159 | <b>-0,4616045</b> | 1821 | 2383 | <b>2102</b>   |
| NIPA2     | -0,508962 | -0,414    | <b>-0,461481</b>  | 1438 | 1803 | <b>1620,5</b> |
| KIAA0240  | -0,483569 | -0,43867  | <b>-0,4611195</b> | 1476 | 1935 | <b>1705,5</b> |
| ACAD8     | -0,946983 | 0,024874  | <b>-0,4610545</b> | 1475 | 1936 | <b>1705,5</b> |
| DEFB112   | -0,460868 | NaN       | <b>-0,460868</b>  | 2151 | NaN  | <b>2151</b>   |
| OSBP      | 0,139973  | -1,061539 | <b>-0,460783</b>  | 1602 | 2799 | <b>2200,5</b> |
| AMBP      | -0,275625 | -0,645818 | <b>-0,4607215</b> | 1299 | 2257 | <b>1778</b>   |
| OMP       | -0,51117  | -0,409618 | <b>-0,460394</b>  | 1633 | 2152 | <b>1892,5</b> |
| NEIL2     | -0,003548 | -0,916964 | <b>-0,460256</b>  | 1614 | 2148 | <b>1881</b>   |
| C20orf108 | -0,419894 | -0,500273 | <b>-0,4600835</b> | 1600 | 2070 | <b>1835</b>   |
| IPO5      | -1,228025 | 0,308058  | <b>-0,4599835</b> | 1778 | 2065 | <b>1921,5</b> |
| EMR1      | -0,459913 | NaN       | <b>-0,459913</b>  | 1848 | NaN  | <b>1848</b>   |
| C16orf3   | -0,459688 | NaN       | <b>-0,459688</b>  | 1658 | NaN  | <b>1658</b>   |
| SLC30A2   | -0,180099 | -0,73924  | <b>-0,4596695</b> | 1805 | 2060 | <b>1932,5</b> |
| CRYL1     | 0,12064   | -1,039542 | <b>-0,459451</b>  | 1327 | 2101 | <b>1714</b>   |
| ZNF175    | -0,219116 | -0,699381 | <b>-0,4592485</b> | 1072 | 1861 | <b>1466,5</b> |
| CCNB1     | -0,669562 | -0,248472 | <b>-0,459017</b>  | 1271 | 1596 | <b>1433,5</b> |

|          |           |           |                   |      |      |               |
|----------|-----------|-----------|-------------------|------|------|---------------|
| RHCG     | -0,458845 | NaN       | <b>-0,458845</b>  | 1498 | NaN  | <b>1498</b>   |
| HCFC2    | -0,793153 | -0,124532 | <b>-0,4588425</b> | 1704 | 2447 | <b>2075,5</b> |
| CDKN2A   | -0,472856 | -0,444666 | <b>-0,458761</b>  | 1707 | 2451 | <b>2079</b>   |
| PANX2    | -0,444049 | -0,473081 | <b>-0,458565</b>  | 1559 | 1587 | <b>1573</b>   |
| PPL      | -0,823703 | -0,092671 | <b>-0,458187</b>  | 1337 | 1808 | <b>1572,5</b> |
| ZMYM6    | -0,875075 | -0,041258 | <b>-0,4581665</b> | 2138 | 2373 | <b>2255,5</b> |
| NUP37    | -0,261632 | -0,654602 | <b>-0,458117</b>  | 1523 | 1851 | <b>1687</b>   |
| CAMK2B   | 0,22984   | -1,145827 | <b>-0,4579935</b> | 1736 | 1487 | <b>1611,5</b> |
| HIAT1    | -0,760592 | -0,155205 | <b>-0,4578985</b> | 2030 | 3077 | <b>2553,5</b> |
| DDX25    | -0,167904 | -0,747554 | <b>-0,457729</b>  | 1532 | 2383 | <b>1957,5</b> |
| SLC25A3  | -0,093682 | -0,821096 | <b>-0,457389</b>  | 1729 | 2647 | <b>2188</b>   |
| C12orf74 | -0,987237 | 0,072865  | <b>-0,457186</b>  | 2072 | 2113 | <b>2092,5</b> |
| KCNQ3    | -0,342607 | -0,571275 | <b>-0,456941</b>  | 1062 | 1469 | <b>1265,5</b> |
| CAPS     | -0,692105 | -0,221756 | <b>-0,4569305</b> | 1326 | 2388 | <b>1857</b>   |
| CCAR1    | -0,23764  | -0,676088 | <b>-0,456864</b>  | 2005 | 2453 | <b>2229</b>   |
| SMUG1    | -0,388568 | -0,525053 | <b>-0,4568105</b> | 1811 | 1731 | <b>1771</b>   |
| IL13RA1  | -0,23182  | -0,681408 | <b>-0,456614</b>  | 1870 | 1773 | <b>1821,5</b> |
| INSRR    | -0,273864 | -0,639105 | <b>-0,4564845</b> | 1825 | 1822 | <b>1823,5</b> |
| SREBF2   | -0,465239 | -0,447454 | <b>-0,4563465</b> | 1833 | 2443 | <b>2138</b>   |
| RRP1B    | -1,193025 | 0,280688  | <b>-0,4561685</b> | 1575 | 2308 | <b>1941,5</b> |
| DNAJC14  | -0,37218  | -0,539837 | <b>-0,4560085</b> | 1062 | 1448 | <b>1255</b>   |
| HGS      | -0,394748 | -0,517251 | <b>-0,4559995</b> | 671  | 1811 | <b>1241</b>   |
| KRT2     | -0,365437 | -0,546065 | <b>-0,455751</b>  | 1832 | 2694 | <b>2263</b>   |
| EPB41L2  | -0,509728 | -0,401528 | <b>-0,455628</b>  | 1534 | 1377 | <b>1455,5</b> |
| RILP     | -0,138997 | -0,771645 | <b>-0,455321</b>  | 1769 | 2080 | <b>1924,5</b> |
| DIP2C    | -0,81308  | -0,096117 | <b>-0,4545985</b> | 1634 | 1908 | <b>1771</b>   |
| TRIM13   | -0,781768 | -0,127398 | <b>-0,454583</b>  | 1907 | 2569 | <b>2238</b>   |
| BRCA1    | -0,015321 | -0,89378  | <b>-0,4545505</b> | 1568 | 2319 | <b>1943,5</b> |
| NOSIP    | -0,158345 | -0,750451 | <b>-0,454398</b>  | 1439 | 2007 | <b>1723</b>   |
| CD81     | -0,225729 | -0,682321 | <b>-0,454025</b>  | 1872 | 2042 | <b>1957</b>   |
| DNASE1L3 | -0,650221 | -0,257804 | <b>-0,4540125</b> | 1412 | 2030 | <b>1721</b>   |
| SOX30    | -0,487268 | -0,420699 | <b>-0,4539835</b> | 1609 | 1922 | <b>1765,5</b> |
| LARP1B   | -0,453398 | NaN       | <b>-0,453398</b>  | 982  | NaN  | <b>982</b>    |
| CHRM2    | -0,453324 | NaN       | <b>-0,453324</b>  | 1038 | NaN  | <b>1038</b>   |



|          |           |           |                   |      |      |               |
|----------|-----------|-----------|-------------------|------|------|---------------|
| GPR37    | -0,453166 | NaN       | <b>-0,453166</b>  | 1698 | NaN  | <b>1698</b>   |
| OR51Q1   | -0,453068 | NaN       | <b>-0,453068</b>  | 1852 | NaN  | <b>1852</b>   |
| C6orf168 | -0,65461  | -0,251457 | <b>-0,4530335</b> | 900  | 1685 | <b>1292,5</b> |
| LRRC18   | -0,550066 | -0,355701 | <b>-0,4528835</b> | 1387 | 1639 | <b>1513</b>   |
| ODF2     | -0,294733 | -0,610868 | <b>-0,4528005</b> | 1485 | 2512 | <b>1998,5</b> |
| 04-sept  | -0,914059 | 0,008906  | <b>-0,4525765</b> | 1680 | 1999 | <b>1839,5</b> |
| SOS1     | -0,486545 | -0,418516 | <b>-0,4525305</b> | 1627 | 1674 | <b>1650,5</b> |
| POLDIP2  | 0,219286  | -1,124069 | <b>-0,4523915</b> | 1695 | 2782 | <b>2238,5</b> |
| PLK2     | -0,962745 | 0,058533  | <b>-0,452106</b>  | 2000 | 1816 | <b>1908</b>   |
| CSMD2    | -0,486888 | -0,41696  | <b>-0,451924</b>  | 1781 | 2431 | <b>2106</b>   |
| DDX28    | -0,397339 | -0,506365 | <b>-0,451852</b>  | 1205 | 1918 | <b>1561,5</b> |
| SLC22A18 | -0,367704 | -0,53589  | <b>-0,451797</b>  | 1405 | 2025 | <b>1715</b>   |
| PPP1R14D | -0,635572 | -0,267316 | <b>-0,451444</b>  | 1557 | 1996 | <b>1776,5</b> |
| ANXA3    | -0,625134 | -0,27715  | <b>-0,451142</b>  | 1734 | 2381 | <b>2057,5</b> |
| CNGA2    | -1,177409 | 0,275698  | <b>-0,4508555</b> | 1949 | 2473 | <b>2211</b>   |
| ITPRIPL1 | -0,947249 | 0,045715  | <b>-0,450767</b>  | 1868 | 2040 | <b>1954</b>   |
| MGAT3    | -0,867372 | -0,034123 | <b>-0,4507475</b> | 1475 | 1859 | <b>1667</b>   |
| USP48    | -1,052021 | 0,150651  | <b>-0,450685</b>  | 1301 | 1464 | <b>1382,5</b> |
| CACNG5   | -0,190914 | -0,710429 | <b>-0,4506715</b> | 1175 | 2521 | <b>1848</b>   |
| INO80    | -0,268225 | -0,633019 | <b>-0,450622</b>  | 1424 | 2217 | <b>1820,5</b> |
| GYLTL1B  | -1,149241 | 0,24803   | <b>-0,4506055</b> | 1733 | 1936 | <b>1834,5</b> |
| NGB      | 0,38867   | -1,289108 | <b>-0,450219</b>  | 1518 | 2093 | <b>1805,5</b> |
| HOXB1    | -0,655445 | -0,244622 | <b>-0,4500335</b> | 1279 | 1951 | <b>1615</b>   |
| KIF1A    | 0,067168  | -0,966892 | <b>-0,449862</b>  | 1982 | 2427 | <b>2204,5</b> |
| OR8J1    | 0,108154  | -1,006549 | <b>-0,4491975</b> | 2088 | 2026 | <b>2057</b>   |
| CDC42    | 0,219198  | -1,117398 | <b>-0,4491</b>    | 1891 | 1977 | <b>1934</b>   |
| C2orf77  | -1,232178 | 0,33401   | <b>-0,449084</b>  | 1761 | 2050 | <b>1905,5</b> |
| ZFP30    | -0,459327 | -0,43871  | <b>-0,4490185</b> | 2101 | 2788 | <b>2444,5</b> |
| SNRPE    | -0,425951 | -0,47195  | <b>-0,4489505</b> | 2214 | 2317 | <b>2265,5</b> |
| GPRC5B   | -0,448926 | NaN       | <b>-0,448926</b>  | 1338 | NaN  | <b>1338</b>   |
| NTPCR    | -0,689147 | -0,20853  | <b>-0,4488385</b> | 2278 | 2444 | <b>2361</b>   |
| CTBP2    | -0,55656  | -0,340694 | <b>-0,448627</b>  | 2065 | 2103 | <b>2084</b>   |
| KLRF1    | -0,678291 | -0,218721 | <b>-0,448506</b>  | 2022 | 1948 | <b>1985</b>   |
| TAS2R39  | -0,448444 | NaN       | <b>-0,448444</b>  | 2570 | NaN  | <b>2570</b>   |

|           |           |           |                   |      |      |               |
|-----------|-----------|-----------|-------------------|------|------|---------------|
| NRBF2     | -1,298933 | 0,402625  | <b>-0,448154</b>  | 1786 | 2182 | <b>1984</b>   |
| TARS2     | -0,266645 | -0,629592 | <b>-0,4481185</b> | 2056 | 2932 | <b>2494</b>   |
| OR2K2     | -0,324809 | -0,570953 | <b>-0,447881</b>  | 1412 | 1733 | <b>1572,5</b> |
| GUCA1B    | 0,002345  | -0,897991 | <b>-0,447823</b>  | 1491 | 2581 | <b>2036</b>   |
| UCP3      | NaN       | -0,447642 | <b>-0,447642</b>  | NaN  | 2255 | <b>2255</b>   |
| STRC      | 0,050062  | -0,945253 | <b>-0,4475955</b> | 1633 | 1655 | <b>1644</b>   |
| OSR2      | -0,447473 | NaN       | <b>-0,447473</b>  | 1381 | NaN  | <b>1381</b>   |
| OR8S1     | -0,447401 | NaN       | <b>-0,447401</b>  | 1586 | NaN  | <b>1586</b>   |
| MORC4     | -0,846873 | -0,047414 | <b>-0,4471435</b> | 1390 | 1885 | <b>1637,5</b> |
| FBXO3     | -0,817047 | -0,077201 | <b>-0,447124</b>  | 1753 | 2819 | <b>2286</b>   |
| FKRP      | -0,262843 | -0,631326 | <b>-0,4470845</b> | 1784 | 1583 | <b>1683,5</b> |
| PROKR1    | -0,447028 | NaN       | <b>-0,447028</b>  | 1674 | NaN  | <b>1674</b>   |
| CNTN5     | -0,446991 | NaN       | <b>-0,446991</b>  | 2124 | NaN  | <b>2124</b>   |
| NAP1L5    | -0,139076 | -0,754693 | <b>-0,4468845</b> | 1504 | 2163 | <b>1833,5</b> |
| ANKRA2    | -0,249237 | -0,644376 | <b>-0,4468065</b> | 1369 | 1934 | <b>1651,5</b> |
| C20orf96  | -0,490606 | -0,402914 | <b>-0,44676</b>   | 1675 | 2571 | <b>2123</b>   |
| XPO1      | NaN       | -0,446723 | <b>-0,446723</b>  | NaN  | 2079 | <b>2079</b>   |
| NEUROG1   | 0,415064  | -1,308375 | <b>-0,4466555</b> | 1326 | 1993 | <b>1659,5</b> |
| C2orf51   | -0,446492 | NaN       | <b>-0,446492</b>  | 1827 | NaN  | <b>1827</b>   |
| NCBP1     | -0,446471 | NaN       | <b>-0,446471</b>  | 1840 | NaN  | <b>1840</b>   |
| CENPQ     | -0,446461 | NaN       | <b>-0,446461</b>  | 1865 | NaN  | <b>1865</b>   |
| AZI2      | -0,446176 | NaN       | <b>-0,446176</b>  | 1992 | NaN  | <b>1992</b>   |
| ZNF524    | -0,303318 | -0,588963 | <b>-0,4461405</b> | 1503 | 1448 | <b>1475,5</b> |
| IFNAR2    | -0,518653 | -0,373118 | <b>-0,4458855</b> | 1782 | 1853 | <b>1817,5</b> |
| SULT2A1   | -0,060408 | -0,830808 | <b>-0,445608</b>  | 1990 | 2886 | <b>2438</b>   |
| PAPPA     | -0,811653 | -0,079387 | <b>-0,44552</b>   | 1576 | 2071 | <b>1823,5</b> |
| PLS1      | -0,496689 | -0,393877 | <b>-0,445283</b>  | 1289 | 1581 | <b>1435</b>   |
| HMG2P46   | 0,067045  | -0,957553 | <b>-0,445254</b>  | 905  | 1995 | <b>1450</b>   |
| FRS2      | -0,444798 | NaN       | <b>-0,444798</b>  | 1058 | NaN  | <b>1058</b>   |
| TMEM69    | -0,142857 | -0,746697 | <b>-0,444777</b>  | 1643 | 2429 | <b>2036</b>   |
| TNFRSF12A | -0,444762 | NaN       | <b>-0,444762</b>  | 1100 | NaN  | <b>1100</b>   |
| CLTB      | 0,237543  | -1,12704  | <b>-0,4447485</b> | 692  | 1756 | <b>1224</b>   |
| HNRNP1    | -1,666251 | 0,77686   | <b>-0,4446955</b> | 1648 | 2041 | <b>1844,5</b> |
| CCNY      | -0,444689 | NaN       | <b>-0,444689</b>  | 1517 | NaN  | <b>1517</b>   |

|           |           |           |                   |      |      |               |
|-----------|-----------|-----------|-------------------|------|------|---------------|
| RLN1      | -1,210329 | 0,32123   | <b>-0,4445495</b> | 1407 | 2011 | <b>1709</b>   |
| DUSP5     | -1,196933 | 0,308087  | <b>-0,444423</b>  | 1822 | 2339 | <b>2080,5</b> |
| UBXN8     | -0,444318 | NaN       | <b>-0,444318</b>  | 1307 | NaN  | <b>1307</b>   |
| NRN1      | 0,07711   | -0,965575 | <b>-0,4442325</b> | 1522 | 1877 | <b>1699,5</b> |
| RRP8      | -0,778953 | -0,108669 | <b>-0,443811</b>  | 1160 | 1698 | <b>1429</b>   |
| TLR8      | -0,079447 | -0,807069 | <b>-0,443258</b>  | 1754 | 2175 | <b>1964,5</b> |
| ZNF398    | -0,41795  | -0,468372 | <b>-0,443161</b>  | 1188 | 1914 | <b>1551</b>   |
| CAPS2     | -1,533218 | 0,646965  | <b>-0,4431265</b> | 1736 | 1736 | <b>1736</b>   |
| RNF125    | -0,44225  | -0,443817 | <b>-0,4430335</b> | 1865 | 2880 | <b>2372,5</b> |
| OR6C2     | -0,085594 | -0,799737 | <b>-0,4426655</b> | 1609 | 1772 | <b>1690,5</b> |
| NFKBIA    | -0,625351 | -0,259853 | <b>-0,442602</b>  | 1476 | 1332 | <b>1404</b>   |
| PASK      | -0,137141 | -0,74795  | <b>-0,4425455</b> | 1615 | 2269 | <b>1942</b>   |
| C19orf10  | -0,613851 | -0,269744 | <b>-0,4417975</b> | 1242 | 1781 | <b>1511,5</b> |
| KRTAP13-1 | -0,246626 | -0,636851 | <b>-0,4417385</b> | 1207 | 1499 | <b>1353</b>   |
| ARMC7     | -0,441576 | NaN       | <b>-0,441576</b>  | 1573 | NaN  | <b>1573</b>   |
| C14orf2   | -1,248932 | 0,365805  | <b>-0,4415635</b> | 1573 | 2425 | <b>1999</b>   |
| FBXL6     | -0,703251 | -0,179092 | <b>-0,4411715</b> | 1811 | 2052 | <b>1931,5</b> |
| ZSCAN10   | -0,064242 | -0,817542 | <b>-0,440892</b>  | 1833 | 2826 | <b>2329,5</b> |
| LRRC8D    | -0,440878 | NaN       | <b>-0,440878</b>  | 1179 | NaN  | <b>1179</b>   |
| SLC44A5   | -0,440248 | NaN       | <b>-0,440248</b>  | 1773 | NaN  | <b>1773</b>   |
| DENND1C   | -0,018645 | -0,861779 | <b>-0,440212</b>  | 1770 | 2632 | <b>2201</b>   |
| WFDC10B   | -0,744641 | -0,135744 | <b>-0,4401925</b> | 1810 | 1979 | <b>1894,5</b> |
| HOXD9     | -0,47983  | -0,400096 | <b>-0,439963</b>  | 1556 | 1763 | <b>1659,5</b> |
| ADH7      | -0,085161 | -0,794622 | <b>-0,4398915</b> | 1545 | 1885 | <b>1715</b>   |
| SLC24A4   | NaN       | -0,439756 | <b>-0,439756</b>  | NaN  | 2755 | <b>2755</b>   |
| GLIPR1L2  | -0,128645 | -0,750758 | <b>-0,4397015</b> | 1683 | 1669 | <b>1676</b>   |
| PKHD1     | -0,75658  | -0,12259  | <b>-0,439585</b>  | 1462 | 2134 | <b>1798</b>   |
| PLCH2     | 0,127624  | -1,006542 | <b>-0,439459</b>  | 1343 | 1938 | <b>1640,5</b> |
| TRPV6     | 0,13355   | -1,012404 | <b>-0,439427</b>  | 1280 | 1740 | <b>1510</b>   |
| UNKL      | -1,022948 | 0,144129  | <b>-0,4394095</b> | 1513 | 2158 | <b>1835,5</b> |
| ENOX2     | -0,439371 | NaN       | <b>-0,439371</b>  | 1657 | NaN  | <b>1657</b>   |
| OR5B2     | -0,486476 | -0,392154 | <b>-0,439315</b>  | 1448 | 2367 | <b>1907,5</b> |
| CHST5     | -0,330808 | -0,5478   | <b>-0,439304</b>  | 1636 | 1627 | <b>1631,5</b> |
| PDLIM1    | -0,545454 | -0,332812 | <b>-0,439133</b>  | 1520 | 2563 | <b>2041,5</b> |

|             |           |           |                   |      |      |               |
|-------------|-----------|-----------|-------------------|------|------|---------------|
| POU4F2      | 0,075657  | -0,953544 | <b>-0,4389435</b> | 1569 | 2541 | <b>2055</b>   |
| TMEM206     | -0,469392 | -0,408184 | <b>-0,438788</b>  | 1663 | 2182 | <b>1922,5</b> |
| GSS         | -0,320052 | -0,556718 | <b>-0,438385</b>  | 1133 | 1548 | <b>1340,5</b> |
| KLRAP1      | -1,788463 | 0,911786  | <b>-0,4383385</b> | 1521 | 1700 | <b>1610,5</b> |
| GLIPR1      | -0,194643 | -0,681769 | <b>-0,438206</b>  | 1996 | 1946 | <b>1971</b>   |
| PREX1       | -0,69933  | -0,176519 | <b>-0,4379245</b> | 1539 | 1826 | <b>1682,5</b> |
| DDX4        | -0,514741 | -0,360107 | <b>-0,437424</b>  | 1750 | 1978 | <b>1864</b>   |
| TRIM24      | -0,832255 | -0,042587 | <b>-0,437421</b>  | 1851 | 3046 | <b>2448,5</b> |
| C9orf9      | -0,200142 | -0,674425 | <b>-0,4372835</b> | 1496 | 2017 | <b>1756,5</b> |
| ATG9A       | -0,6736   | -0,200851 | <b>-0,4372255</b> | 1522 | 2339 | <b>1930,5</b> |
| FAM9A       | -0,201671 | -0,672688 | <b>-0,4371795</b> | 1282 | 1761 | <b>1521,5</b> |
| ADCYAP1     | 0,265492  | -1,139521 | <b>-0,4370145</b> | 1517 | 1686 | <b>1601,5</b> |
| C19orf59    | -0,079693 | -0,794189 | <b>-0,436941</b>  | 1786 | 1961 | <b>1873,5</b> |
| MIER2       | -0,65234  | -0,221435 | <b>-0,4368875</b> | 1777 | 2559 | <b>2168</b>   |
| PPPDE1      | -0,50531  | -0,36815  | <b>-0,43673</b>   | 1872 | 2445 | <b>2158,5</b> |
| OTUD7A      | -0,436425 | NaN       | <b>-0,436425</b>  | 1637 | NaN  | <b>1637</b>   |
| MMAB        | -0,641057 | -0,231664 | <b>-0,4363605</b> | 2172 | 2180 | <b>2176</b>   |
| C19orf51    | 0,279082  | -1,151307 | <b>-0,4361125</b> | 1694 | 1931 | <b>1812,5</b> |
| ARHGEF11    | -0,263694 | -0,608476 | <b>-0,436085</b>  | 1997 | 1956 | <b>1976,5</b> |
| MCTP2       | -0,112824 | -0,759286 | <b>-0,436055</b>  | 1747 | 2727 | <b>2237</b>   |
| TRIM63      | -0,19587  | -0,67605  | <b>-0,43596</b>   | 1294 | 2824 | <b>2059</b>   |
| MBTPS1      | -0,600313 | -0,271578 | <b>-0,4359455</b> | 1950 | 2287 | <b>2118,5</b> |
| PDLIM7      | -0,283043 | -0,588376 | <b>-0,4357095</b> | 1490 | 1600 | <b>1545</b>   |
| TMEM120A    | 0,667206  | -1,538198 | <b>-0,435496</b>  | 1345 | 2159 | <b>1752</b>   |
| COL18A1-AS1 | 0,139593  | -1,010303 | <b>-0,435355</b>  | 1705 | 2280 | <b>1992,5</b> |
| RTP2        | -0,392559 | -0,477922 | <b>-0,4352405</b> | 1462 | 1886 | <b>1674</b>   |
| C21orf62    | -0,269484 | -0,600811 | <b>-0,4351475</b> | 656  | 1223 | <b>939,5</b>  |
| OLA1        | -0,434828 | NaN       | <b>-0,434828</b>  | 1679 | NaN  | <b>1679</b>   |
| MMP11       | -0,960813 | 0,091722  | <b>-0,4345455</b> | 1268 | 2002 | <b>1635</b>   |
| YAP1        | -0,870418 | 0,001716  | <b>-0,434351</b>  | 1397 | 2491 | <b>1944</b>   |
| SRP72       | -1,101455 | 0,233179  | <b>-0,434138</b>  | 1523 | 1479 | <b>1501</b>   |
| ATP5H       | -0,283069 | -0,585153 | <b>-0,434111</b>  | 1791 | 1756 | <b>1773,5</b> |
| ANAPC2      | -0,830645 | -0,036461 | <b>-0,433553</b>  | 1095 | 2155 | <b>1625</b>   |
| HES4        | -0,660329 | -0,206356 | <b>-0,4333425</b> | 1031 | 1104 | <b>1067,5</b> |

|          |           |           |                   |      |      |               |
|----------|-----------|-----------|-------------------|------|------|---------------|
| ERLIN1   | -0,433215 | NaN       | <b>-0,433215</b>  | 1755 | NaN  | <b>1755</b>   |
| C8orf37  | -1,000825 | 0,13511   | <b>-0,4328575</b> | 1705 | 1927 | <b>1816</b>   |
| ERICH1   | -0,074022 | -0,791427 | <b>-0,4327245</b> | 1743 | 2428 | <b>2085,5</b> |
| JAM3     | -0,685975 | -0,179449 | <b>-0,432712</b>  | 1744 | 2235 | <b>1989,5</b> |
| CENPW    | -0,30327  | -0,561812 | <b>-0,432541</b>  | 1343 | 1522 | <b>1432,5</b> |
| RPL34    | -1,133248 | 0,268169  | <b>-0,4325395</b> | 1136 | 1812 | <b>1474</b>   |
| CES4A    | -0,657317 | -0,20703  | <b>-0,4321735</b> | 1664 | 1649 | <b>1656,5</b> |
| C12orf53 | -0,729693 | -0,134401 | <b>-0,432047</b>  | 1824 | 2628 | <b>2226</b>   |
| ARIH2    | -0,659499 | -0,204418 | <b>-0,4319585</b> | 2073 | 3180 | <b>2626,5</b> |
| SDSL     | -0,701075 | -0,161929 | <b>-0,431502</b>  | 1514 | 1851 | <b>1682,5</b> |
| HIC1     | NaN       | -0,431497 | <b>-0,431497</b>  | NaN  | 2889 | <b>2889</b>   |
| GPX3     | -1,442757 | 0,579872  | <b>-0,4314425</b> | 1626 | 2206 | <b>1916</b>   |
| C8orf42  | -0,431142 | NaN       | <b>-0,431142</b>  | 1732 | NaN  | <b>1732</b>   |
| TMSB4Y   | -0,3155   | -0,546735 | <b>-0,4311175</b> | 1943 | 2359 | <b>2151</b>   |
| COMMD8   | -1,800107 | 0,938802  | <b>-0,4306525</b> | 1805 | 1361 | <b>1583</b>   |
| TAF2     | -1,236374 | 0,375488  | <b>-0,430443</b>  | 2121 | 2338 | <b>2229,5</b> |
| OR6K2    | -0,519158 | -0,341518 | <b>-0,430338</b>  | 1604 | 2089 | <b>1846,5</b> |
| RPL36    | 0,269029  | -1,129127 | <b>-0,430049</b>  | 936  | 1177 | <b>1056,5</b> |
| FAM160A2 | -0,429926 | NaN       | <b>-0,429926</b>  | 1592 | NaN  | <b>1592</b>   |
| PEBP1    | -0,170883 | -0,688566 | <b>-0,4297245</b> | 1793 | 1867 | <b>1830</b>   |
| C6orf35  | 0,245149  | -1,104272 | <b>-0,4295615</b> | 1528 | 1812 | <b>1670</b>   |
| KIAA1377 | 0,534767  | -1,393525 | <b>-0,429379</b>  | 1263 | 1913 | <b>1588</b>   |
| LYVE1    | -0,086555 | -0,771283 | <b>-0,428919</b>  | 1354 | 1804 | <b>1579</b>   |
| TPSD1    | 0,882636  | -1,740153 | <b>-0,4287585</b> | 1654 | 1305 | <b>1479,5</b> |
| RWDD2A   | -0,445639 | -0,41166  | <b>-0,4286495</b> | 1807 | 2048 | <b>1927,5</b> |
| C2orf66  | -1,082896 | 0,225642  | <b>-0,428627</b>  | 1712 | 1984 | <b>1848</b>   |
| KIAA1274 | -0,214224 | -0,642751 | <b>-0,4284875</b> | 1612 | 2455 | <b>2033,5</b> |
| PHB      | -0,520808 | -0,335203 | <b>-0,4280055</b> | 1384 | 1662 | <b>1523</b>   |
| CMPK1    | 1,173038  | -2,02767  | <b>-0,427316</b>  | 1542 | 1889 | <b>1715,5</b> |
| DCC      | -0,702837 | -0,151588 | <b>-0,4272125</b> | 1800 | 2305 | <b>2052,5</b> |
| C7orf46  | -0,59443  | -0,25943  | <b>-0,42693</b>   | 1101 | 2563 | <b>1832</b>   |
| AVPR2    | -0,426692 | NaN       | <b>-0,426692</b>  | 1832 | NaN  | <b>1832</b>   |
| DUSP6    | -0,482957 | -0,370295 | <b>-0,426626</b>  | 1005 | 1579 | <b>1292</b>   |
| PENK     | -0,420439 | -0,4328   | <b>-0,4266195</b> | 1993 | 1975 | <b>1984</b>   |

|          |           |           |                   |      |      |               |
|----------|-----------|-----------|-------------------|------|------|---------------|
| CD320    | -0,426474 | NaN       | <b>-0,426474</b>  | 1794 | NaN  | <b>1794</b>   |
| RUNDC1   | -0,317341 | -0,535494 | <b>-0,4264175</b> | 1973 | 2142 | <b>2057,5</b> |
| PATE1    | 0,067885  | -0,920563 | <b>-0,426339</b>  | 2120 | 2382 | <b>2251</b>   |
| MID1     | -1,164356 | 0,313352  | <b>-0,425502</b>  | 1785 | 2785 | <b>2285</b>   |
| FUCA2    | -0,112203 | -0,738262 | <b>-0,4252325</b> | 1824 | 2057 | <b>1940,5</b> |
| GPSM2    | -1,032206 | 0,181985  | <b>-0,4251105</b> | 1536 | 2157 | <b>1846,5</b> |
| CPLX4    | -0,634802 | -0,215374 | <b>-0,425088</b>  | 1761 | 2140 | <b>1950,5</b> |
| MAG11    | 0,057479  | -0,9069   | <b>-0,4247105</b> | 1710 | 2310 | <b>2010</b>   |
| BCL7B    | -1,123959 | 0,275082  | <b>-0,4244385</b> | 1338 | 1807 | <b>1572,5</b> |
| CRYBB1   | -0,253524 | -0,595339 | <b>-0,4244315</b> | 294  | 1269 | <b>781,5</b>  |
| ZNF782   | -0,453491 | -0,39536  | <b>-0,4244255</b> | 1775 | 2149 | <b>1962</b>   |
| THG1L    | -0,596042 | -0,252186 | <b>-0,424114</b>  | 2016 | 2553 | <b>2284,5</b> |
| TTC21A   | -0,896404 | 0,049391  | <b>-0,4235065</b> | 1181 | 1797 | <b>1489</b>   |
| COPS7A   | -1,019792 | 0,172817  | <b>-0,4234875</b> | 1657 | 1247 | <b>1452</b>   |
| IL31     | 0,091502  | -0,937765 | <b>-0,4231315</b> | 1441 | 1681 | <b>1561</b>   |
| HSD17B1  | -0,329846 | -0,516381 | <b>-0,4231135</b> | 1149 | 1765 | <b>1457</b>   |
| SCN8A    | -0,045091 | -0,800944 | <b>-0,4230175</b> | 1665 | 2695 | <b>2180</b>   |
| GRK6     | -0,624995 | -0,220415 | <b>-0,422705</b>  | 1567 | 1621 | <b>1594</b>   |
| PFDN4    | 0,096967  | -0,941767 | <b>-0,4224</b>    | 1957 | 1953 | <b>1955</b>   |
| ABCD1    | 0,293334  | -1,138131 | <b>-0,4223985</b> | 949  | 1601 | <b>1275</b>   |
| FCRLB    | -0,422343 | NaN       | <b>-0,422343</b>  | 1352 | NaN  | <b>1352</b>   |
| KDM1A    | -0,177437 | -0,666909 | <b>-0,422173</b>  | 1854 | 2677 | <b>2265,5</b> |
| COQ7     | -1,033967 | 0,19      | <b>-0,4219835</b> | 1762 | 2016 | <b>1889</b>   |
| EFCAB6   | -0,033319 | -0,810582 | <b>-0,4219505</b> | 1593 | 2139 | <b>1866</b>   |
| IFT172   | -0,421655 | NaN       | <b>-0,421655</b>  | 1505 | NaN  | <b>1505</b>   |
| DHRS11   | -0,243179 | -0,599932 | <b>-0,4215555</b> | 1475 | 2276 | <b>1875,5</b> |
| AOX1     | -0,292679 | -0,550274 | <b>-0,4214765</b> | 876  | 1597 | <b>1236,5</b> |
| LIAS     | -0,964287 | 0,121373  | <b>-0,421457</b>  | 1425 | 2852 | <b>2138,5</b> |
| EIF4EBP1 | 0,057188  | -0,900079 | <b>-0,4214455</b> | 1306 | 2555 | <b>1930,5</b> |
| ATXN2L   | -1,232349 | 0,389904  | <b>-0,4212225</b> | 1585 | 2064 | <b>1824,5</b> |
| EME1     | -0,964159 | 0,121817  | <b>-0,421171</b>  | 716  | 1177 | <b>946,5</b>  |
| BSN      | -1,236002 | 0,393784  | <b>-0,421109</b>  | 1376 | 1920 | <b>1648</b>   |
| BCL9     | -0,939024 | 0,097554  | <b>-0,420735</b>  | 1523 | 2500 | <b>2011,5</b> |
| RNF181   | -0,114478 | -0,726313 | <b>-0,4203955</b> | 1117 | 1551 | <b>1334</b>   |

|           |           |           |                   |      |      |               |
|-----------|-----------|-----------|-------------------|------|------|---------------|
| C21orf33  | -0,151656 | -0,688918 | <b>-0,420287</b>  | 2061 | 2187 | <b>2124</b>   |
| WDR20     | -0,278594 | -0,561849 | <b>-0,4202215</b> | 1494 | 1746 | <b>1620</b>   |
| EXOC7     | -0,420209 | NaN       | <b>-0,420209</b>  | 1539 | NaN  | <b>1539</b>   |
| MANBA     | -0,794554 | -0,045713 | <b>-0,4201335</b> | 1749 | 2102 | <b>1925,5</b> |
| TSEN34    | -0,356936 | -0,483183 | <b>-0,4200595</b> | 1593 | 2089 | <b>1841</b>   |
| CRMP1     | 0,336334  | -1,175991 | <b>-0,4198285</b> | 1412 | 2391 | <b>1901,5</b> |
| ZNF268    | -0,419654 | NaN       | <b>-0,419654</b>  | 1557 | NaN  | <b>1557</b>   |
| GPR19     | -0,419647 | NaN       | <b>-0,419647</b>  | 1015 | NaN  | <b>1015</b>   |
| IL36B     | -0,443669 | -0,395447 | <b>-0,419558</b>  | 1948 | 2376 | <b>2162</b>   |
| LRP1      | -1,593175 | 0,7542    | <b>-0,4194875</b> | 1693 | 1999 | <b>1846</b>   |
| STYX      | -0,728369 | -0,109929 | <b>-0,419149</b>  | 1814 | 2427 | <b>2120,5</b> |
| NIPSNAP3B | -0,363844 | -0,474072 | <b>-0,418958</b>  | 1515 | 1619 | <b>1567</b>   |
| RNF114    | -0,416816 | -0,420037 | <b>-0,4184265</b> | 1991 | 3082 | <b>2536,5</b> |
| FAH       | 0,111673  | -0,948463 | <b>-0,418395</b>  | 1800 | 2056 | <b>1928</b>   |
| TRABD     | -0,418382 | NaN       | <b>-0,418382</b>  | 1475 | NaN  | <b>1475</b>   |
| TMEM150C  | 0,023917  | -0,860673 | <b>-0,418378</b>  | 1644 | 2728 | <b>2186</b>   |
| ACSBG2    | NaN       | -0,418336 | <b>-0,418336</b>  | NaN  | 2382 | <b>2382</b>   |
| PPOX      | -0,458258 | -0,378172 | <b>-0,418215</b>  | 1788 | 1827 | <b>1807,5</b> |
| PI4K2A    | 0,025913  | -0,862286 | <b>-0,4181865</b> | 1799 | 2033 | <b>1916</b>   |
| APIP      | -0,63243  | -0,203743 | <b>-0,4180865</b> | 1748 | 2238 | <b>1993</b>   |
| PEAK1     | -1,072302 | 0,236336  | <b>-0,417983</b>  | 1240 | 1483 | <b>1361,5</b> |
| EID1      | -0,41797  | NaN       | <b>-0,41797</b>   | 1829 | NaN  | <b>1829</b>   |
| IGSF22    | -0,402502 | -0,433343 | <b>-0,4179225</b> | 1553 | 1875 | <b>1714</b>   |
| PLEKHJ1   | -0,41777  | NaN       | <b>-0,41777</b>   | 1483 | NaN  | <b>1483</b>   |
| DKK4      | -0,670759 | -0,164758 | <b>-0,4177585</b> | 2043 | 2411 | <b>2227</b>   |
| SCARB2    | -0,371705 | -0,463227 | <b>-0,417466</b>  | 1765 | 1747 | <b>1756</b>   |
| YIPF2     | -0,417023 | NaN       | <b>-0,417023</b>  | 1041 | NaN  | <b>1041</b>   |
| CELA1     | -0,684587 | -0,149262 | <b>-0,4169245</b> | 1785 | 2303 | <b>2044</b>   |
| TCERG1L   | -0,566385 | -0,267399 | <b>-0,416892</b>  | 1661 | 2344 | <b>2002,5</b> |
| HIST1H1B  | -0,329459 | -0,504231 | <b>-0,416845</b>  | 1434 | 1311 | <b>1372,5</b> |
| RNF112    | -0,119005 | -0,714265 | <b>-0,416635</b>  | 2020 | 2474 | <b>2247</b>   |
| LEPROT    | -1,624563 | 0,79166   | <b>-0,4164515</b> | 1477 | 1754 | <b>1615,5</b> |
| CEACAM4   | -1,285875 | 0,453545  | <b>-0,416165</b>  | 1482 | 1916 | <b>1699</b>   |
| CREB3L1   | -0,404794 | -0,427188 | <b>-0,415991</b>  | 1698 | 1381 | <b>1539,5</b> |

|          |           |           |                   |      |      |               |
|----------|-----------|-----------|-------------------|------|------|---------------|
| OR13D1   | -0,669614 | -0,162078 | <b>-0,415846</b>  | 1797 | 1686 | <b>1741,5</b> |
| XRCC6    | -0,122208 | -0,709258 | <b>-0,415733</b>  | 2116 | 2846 | <b>2481</b>   |
| GABRG1   | -0,683358 | -0,148053 | <b>-0,4157055</b> | 2168 | 2710 | <b>2439</b>   |
| LAMP2    | NaN       | -0,414909 | <b>-0,414909</b>  | NaN  | 1780 | <b>1780</b>   |
| ZNF154   | -0,125808 | -0,70386  | <b>-0,414834</b>  | 1614 | 2613 | <b>2113,5</b> |
| LHX9     | -0,414714 | NaN       | <b>-0,414714</b>  | 1685 | NaN  | <b>1685</b>   |
| APBA1    | -0,034179 | -0,794678 | <b>-0,4144285</b> | 1042 | 1436 | <b>1239</b>   |
| NEXN     | -1,196424 | 0,367855  | <b>-0,4142845</b> | 1880 | 2128 | <b>2004</b>   |
| SNRNP70  | -0,095527 | -0,732939 | <b>-0,414233</b>  | 1312 | 1469 | <b>1390,5</b> |
| CAV1     | -0,593886 | -0,234111 | <b>-0,4139985</b> | 1564 | 2658 | <b>2111</b>   |
| VPS33B   | -0,835911 | 0,008324  | <b>-0,4137935</b> | 1057 | 2316 | <b>1686,5</b> |
| ZBTB7C   | -0,413731 | NaN       | <b>-0,413731</b>  | 1553 | NaN  | <b>1553</b>   |
| ETNK1    | -0,469421 | -0,357011 | <b>-0,413216</b>  | 2001 | 2257 | <b>2129</b>   |
| TMEM123  | -0,413126 | NaN       | <b>-0,413126</b>  | 1915 | NaN  | <b>1915</b>   |
| LAG3     | -0,752233 | -0,073964 | <b>-0,4130985</b> | 1666 | 1630 | <b>1648</b>   |
| KIAA1467 | -0,973085 | 0,147275  | <b>-0,412905</b>  | 1790 | 2239 | <b>2014,5</b> |
| POLR3GL  | -0,477884 | -0,347726 | <b>-0,412805</b>  | 1636 | 2152 | <b>1894</b>   |
| MBNL3    | 0,543727  | -1,369038 | <b>-0,4126555</b> | 750  | 1220 | <b>985</b>    |
| IFT27    | -0,511285 | -0,314016 | <b>-0,4126505</b> | 1552 | 1891 | <b>1721,5</b> |
| DPPA2    | 0,092536  | -0,917725 | <b>-0,4125945</b> | 1558 | 1759 | <b>1658,5</b> |
| MNDA     | -0,520037 | -0,304926 | <b>-0,4124815</b> | 1427 | 1928 | <b>1677,5</b> |
| ZNF664   | -0,1951   | -0,629719 | <b>-0,4124095</b> | 1369 | 1809 | <b>1589</b>   |
| TCEAL7   | -0,615776 | -0,208657 | <b>-0,4122165</b> | 1922 | 2314 | <b>2118</b>   |
| SRPRB    | -0,412109 | NaN       | <b>-0,412109</b>  | 1629 | NaN  | <b>1629</b>   |
| IVNS1ABP | -0,081697 | -0,742479 | <b>-0,412088</b>  | 1593 | 1758 | <b>1675,5</b> |
| TTLL5    | -0,411849 | NaN       | <b>-0,411849</b>  | 1810 | NaN  | <b>1810</b>   |
| OXTR     | -0,411807 | NaN       | <b>-0,411807</b>  | 1118 | NaN  | <b>1118</b>   |
| FOXF2    | -0,548677 | -0,274746 | <b>-0,4117115</b> | 1787 | 1650 | <b>1718,5</b> |
| GDI2     | -1,023359 | 0,200136  | <b>-0,4116115</b> | 1379 | 1557 | <b>1468</b>   |
| NETO1    | -0,687282 | -0,135565 | <b>-0,4114235</b> | 1261 | 1419 | <b>1340</b>   |
| OTP      | -0,373378 | -0,448616 | <b>-0,410997</b>  | 1984 | 1843 | <b>1913,5</b> |
| RASSF4   | -0,410981 | NaN       | <b>-0,410981</b>  | 1638 | NaN  | <b>1638</b>   |
| ZW10     | -0,609915 | -0,211999 | <b>-0,410957</b>  | 1452 | 2411 | <b>1931,5</b> |
| CELSR3   | -0,410949 | NaN       | <b>-0,410949</b>  | 1665 | NaN  | <b>1665</b>   |



|           |           |           |                   |      |      |               |
|-----------|-----------|-----------|-------------------|------|------|---------------|
| PHLDA1    | -0,795432 | -0,026464 | <b>-0,410948</b>  | 1074 | 1675 | <b>1374,5</b> |
| DOLPP1    | 0,035811  | -0,857515 | <b>-0,410852</b>  | 1047 | 2130 | <b>1588,5</b> |
| CCDC88A   | -0,758608 | -0,062589 | <b>-0,4105985</b> | 1298 | 1322 | <b>1310</b>   |
| VAX2      | -0,635031 | -0,185763 | <b>-0,410397</b>  | 1652 | 2143 | <b>1897,5</b> |
| FRMPD1    | -0,375356 | -0,445431 | <b>-0,4103935</b> | 1843 | 1695 | <b>1769</b>   |
| ZNF766    | -1,256161 | 0,436228  | <b>-0,4099665</b> | 1469 | 1956 | <b>1712,5</b> |
| CREG2     | -0,644977 | -0,174043 | <b>-0,40951</b>   | 1948 | 2344 | <b>2146</b>   |
| INSIG2    | 0,099488  | -0,918378 | <b>-0,409445</b>  | 1044 | 2105 | <b>1574,5</b> |
| GTPBP4    | -0,789837 | -0,028876 | <b>-0,4093565</b> | 1585 | 1977 | <b>1781</b>   |
| ZBTB9     | -0,409208 | NaN       | <b>-0,409208</b>  | 1944 | NaN  | <b>1944</b>   |
| OR10J5    | -0,660109 | -0,158164 | <b>-0,4091365</b> | 1493 | 2227 | <b>1860</b>   |
| ATXN3     | -0,426375 | -0,391804 | <b>-0,4090895</b> | 1748 | 1600 | <b>1674</b>   |
| NUMA1     | -0,386666 | -0,431471 | <b>-0,4090685</b> | 1565 | 1874 | <b>1719,5</b> |
| FOXP4     | -0,127057 | -0,690907 | <b>-0,408982</b>  | 1601 | 1848 | <b>1724,5</b> |
| PCMTD1    | -0,236413 | -0,581221 | <b>-0,408817</b>  | 1221 | 1483 | <b>1352</b>   |
| PFDN1     | -0,456492 | -0,360932 | <b>-0,408712</b>  | 2006 | 2430 | <b>2218</b>   |
| SLC43A1   | -0,997021 | 0,17967   | <b>-0,4086755</b> | 1522 | 2341 | <b>1931,5</b> |
| C5orf35   | -0,184869 | -0,632381 | <b>-0,408625</b>  | 1629 | 2327 | <b>1978</b>   |
| ERAL1     | 0,3039    | -1,120865 | <b>-0,4084825</b> | 2038 | 2351 | <b>2194,5</b> |
| TSC22D2   | -0,408461 | NaN       | <b>-0,408461</b>  | 1672 | NaN  | <b>1672</b>   |
| OR8D1     | -1,049508 | 0,232875  | <b>-0,4083165</b> | 1891 | 2391 | <b>2141</b>   |
| FAM107B   | -0,407994 | NaN       | <b>-0,407994</b>  | 1353 | NaN  | <b>1353</b>   |
| SERPINB13 | -0,120084 | -0,69585  | <b>-0,407967</b>  | 1375 | 2180 | <b>1777,5</b> |
| PRDM10    | -0,407768 | NaN       | <b>-0,407768</b>  | 1446 | NaN  | <b>1446</b>   |
| FLII      | -0,210793 | -0,604741 | <b>-0,407767</b>  | 1350 | 1970 | <b>1660</b>   |
| DLEC1     | -0,344522 | -0,470761 | <b>-0,4076415</b> | 1376 | 2363 | <b>1869,5</b> |
| OSCP1     | -0,50138  | -0,313575 | <b>-0,4074775</b> | 1399 | 1720 | <b>1559,5</b> |
| FLAD1     | -0,360982 | -0,453802 | <b>-0,407392</b>  | 1810 | 2273 | <b>2041,5</b> |
| MYL3      | -0,770577 | -0,043677 | <b>-0,407127</b>  | 1452 | 2198 | <b>1825</b>   |
| RNF32     | -0,353618 | -0,460381 | <b>-0,4069995</b> | 1228 | 2276 | <b>1752</b>   |
| CDK7      | 0,303986  | -1,117702 | <b>-0,406858</b>  | 1858 | 1721 | <b>1789,5</b> |
| CCDC53    | 0,327255  | -1,140529 | <b>-0,406637</b>  | 1575 | 1771 | <b>1673</b>   |
| MRPL42    | -0,576579 | -0,236279 | <b>-0,406429</b>  | 1968 | 2063 | <b>2015,5</b> |
| CRHR2     | -0,406373 | NaN       | <b>-0,406373</b>  | 1463 | NaN  | <b>1463</b>   |

|           |           |           |                   |      |      |               |
|-----------|-----------|-----------|-------------------|------|------|---------------|
| YARS      | -0,471883 | -0,340727 | <b>-0,406305</b>  | 1432 | 1968 | <b>1700</b>   |
| PIGW      | -0,047706 | -0,764508 | <b>-0,406107</b>  | 1536 | 1505 | <b>1520,5</b> |
| HERC6     | -0,346941 | -0,464958 | <b>-0,4059495</b> | 1323 | 2372 | <b>1847,5</b> |
| SP100     | -0,911577 | 0,101192  | <b>-0,4051925</b> | 1560 | 2136 | <b>1848</b>   |
| ATG4A     | -0,385283 | -0,424597 | <b>-0,40494</b>   | 1302 | 1638 | <b>1470</b>   |
| SLC6A5    | -0,709387 | -0,100268 | <b>-0,4048275</b> | 1825 | 1833 | <b>1829</b>   |
| VWA5B1    | 0,105507  | -0,91445  | <b>-0,4044715</b> | 1602 | 2071 | <b>1836,5</b> |
| ARL5B     | -0,404416 | NaN       | <b>-0,404416</b>  | 1847 | NaN  | <b>1847</b>   |
| ZNF688    | -0,40438  | NaN       | <b>-0,40438</b>   | 1652 | NaN  | <b>1652</b>   |
| CDK16     | -0,348992 | -0,459506 | <b>-0,404249</b>  | 1059 | 1613 | <b>1336</b>   |
| APOH      | -0,186352 | -0,621879 | <b>-0,4041155</b> | 724  | 923  | <b>823,5</b>  |
| ID1       | -0,17475  | -0,633354 | <b>-0,404052</b>  | 1851 | 2106 | <b>1978,5</b> |
| NFATC1    | 0,091847  | -0,899873 | <b>-0,404013</b>  | 1521 | 1908 | <b>1714,5</b> |
| MAD1L1    | -0,403931 | NaN       | <b>-0,403931</b>  | 930  | NaN  | <b>930</b>    |
| C17orf97  | -0,40356  | NaN       | <b>-0,40356</b>   | 1685 | NaN  | <b>1685</b>   |
| PSMA4     | -0,117783 | -0,688203 | <b>-0,402993</b>  | 867  | 1687 | <b>1277</b>   |
| PFKP      | -0,406567 | -0,399323 | <b>-0,402945</b>  | 2108 | 2068 | <b>2088</b>   |
| ZNF239    | -1,138544 | 0,332773  | <b>-0,4028855</b> | 2017 | 2111 | <b>2064</b>   |
| ANKRD13B  | -0,129859 | -0,675852 | <b>-0,4028555</b> | 1149 | 1651 | <b>1400</b>   |
| SEPHS1    | NaN       | -0,402392 | <b>-0,402392</b>  | NaN  | 2730 | <b>2730</b>   |
| C1orf212  | -0,402092 | NaN       | <b>-0,402092</b>  | 1922 | NaN  | <b>1922</b>   |
| BVES      | -1,059896 | 0,25592   | <b>-0,401988</b>  | 1918 | 2998 | <b>2458</b>   |
| EAF1      | -0,665133 | -0,138738 | <b>-0,4019355</b> | 1447 | 1655 | <b>1551</b>   |
| TNFAIP8L2 | -0,514596 | -0,289094 | <b>-0,401845</b>  | 1263 | 1740 | <b>1501,5</b> |
| NTSR2     | -0,401837 | NaN       | <b>-0,401837</b>  | 1106 | NaN  | <b>1106</b>   |
| SYTL1     | -0,343731 | -0,459829 | <b>-0,40178</b>   | 1480 | 1845 | <b>1662,5</b> |
| CARS2     | -0,565537 | -0,236855 | <b>-0,401196</b>  | 1654 | 2771 | <b>2212,5</b> |
| MEP1A     | -0,677286 | -0,125061 | <b>-0,4011735</b> | 1833 | 2042 | <b>1937,5</b> |
| MRPS7     | 0,202573  | -1,004105 | <b>-0,400766</b>  | 1809 | 1902 | <b>1855,5</b> |
| VPS29     | NaN       | -0,400534 | <b>-0,400534</b>  | NaN  | 2343 | <b>2343</b>   |
| PEF1      | -0,400439 | NaN       | <b>-0,400439</b>  | 1566 | NaN  | <b>1566</b>   |
| SYT15     | -0,947426 | 0,146637  | <b>-0,4003945</b> | 1137 | 1527 | <b>1332</b>   |
| PUS7L     | -0,649769 | -0,150888 | <b>-0,4003285</b> | 1723 | 2138 | <b>1930,5</b> |
| AGPAT6    | -0,561447 | -0,239103 | <b>-0,400275</b>  | 1420 | 2015 | <b>1717,5</b> |

|          |           |           |                   |      |      |               |
|----------|-----------|-----------|-------------------|------|------|---------------|
| OR2W5    | -1,620443 | 0,821135  | <b>-0,399654</b>  | 1850 | 1384 | <b>1617</b>   |
| SH3BP2   | -0,813019 | 0,014326  | <b>-0,3993465</b> | 1462 | 1978 | <b>1720</b>   |
| CNTD1    | -0,399264 | NaN       | <b>-0,399264</b>  | 1220 | NaN  | <b>1220</b>   |
| LMNB1    | -0,39921  | NaN       | <b>-0,39921</b>   | 1764 | NaN  | <b>1764</b>   |
| ZDHH18   | -0,369665 | -0,428239 | <b>-0,398952</b>  | 1066 | 1387 | <b>1226,5</b> |
| ATP6V0A2 | -0,113322 | -0,684331 | <b>-0,3988265</b> | 1928 | 2494 | <b>2211</b>   |
| FTSJ2    | -0,515673 | -0,281639 | <b>-0,398656</b>  | 1679 | 1861 | <b>1770</b>   |
| NEK9     | -0,342193 | -0,454801 | <b>-0,398497</b>  | 1786 | 2026 | <b>1906</b>   |
| CDK1     | -1,151904 | 0,355015  | <b>-0,3984445</b> | 1646 | 1610 | <b>1628</b>   |
| CHRD12   | -0,041087 | -0,755668 | <b>-0,3983775</b> | 1682 | 2044 | <b>1863</b>   |
| LANCL2   | -0,060628 | -0,736109 | <b>-0,3983685</b> | 1553 | 2091 | <b>1822</b>   |
| DEFB134  | 0,143604  | -0,940281 | <b>-0,3983385</b> | 1846 | 2111 | <b>1978,5</b> |
| KIAA0494 | -0,397842 | -0,398435 | <b>-0,3981385</b> | 1873 | 2846 | <b>2359,5</b> |
| OVGP1    | -0,192658 | -0,603474 | <b>-0,398066</b>  | 1586 | 2048 | <b>1817</b>   |
| S100A2   | -0,326918 | -0,469013 | <b>-0,3979655</b> | 1540 | 2091 | <b>1815,5</b> |
| TIMM13   | -0,413676 | -0,381833 | <b>-0,3977545</b> | 1255 | 1787 | <b>1521</b>   |
| GRK7     | 0,983307  | -1,778785 | <b>-0,397739</b>  | 1667 | 1716 | <b>1691,5</b> |
| CHRD11   | -1,155668 | 0,361274  | <b>-0,397197</b>  | 1704 | 2112 | <b>1908</b>   |
| OR1A1    | -0,248334 | -0,545987 | <b>-0,3971605</b> | 910  | 1347 | <b>1128,5</b> |
| KLF16    | -0,227332 | -0,566853 | <b>-0,3970925</b> | 1628 | 2639 | <b>2133,5</b> |
| AGXT2L2  | -1,002193 | 0,208166  | <b>-0,3970135</b> | 1439 | 1795 | <b>1617</b>   |
| GLT25D1  | -1,091466 | 0,297492  | <b>-0,396987</b>  | 1431 | 1538 | <b>1484,5</b> |
| MME      | -0,726794 | -0,066145 | <b>-0,3964695</b> | 1683 | 2201 | <b>1942</b>   |
| SIAH2    | 0,177351  | -0,969942 | <b>-0,3962955</b> | 787  | 1309 | <b>1048</b>   |
| KCNJ3    | -0,244055 | -0,548286 | <b>-0,3961705</b> | 1628 | 2794 | <b>2211</b>   |
| PRM1     | -0,723864 | -0,067818 | <b>-0,395841</b>  | 1126 | 1844 | <b>1485</b>   |
| TMX1     | -0,135596 | -0,655898 | <b>-0,395747</b>  | 1601 | 1972 | <b>1786,5</b> |
| AKIRIN1  | -0,287002 | -0,503401 | <b>-0,3952015</b> | 1072 | 1749 | <b>1410,5</b> |
| STON2    | 0,05722   | -0,847159 | <b>-0,3949695</b> | 762  | 971  | <b>866,5</b>  |
| CLDN8    | -1,07308  | 0,283256  | <b>-0,394912</b>  | 1623 | 1930 | <b>1776,5</b> |
| ACCS     | 0,309123  | -1,098769 | <b>-0,394823</b>  | 1762 | 2665 | <b>2213,5</b> |
| CA5A     | -0,766059 | -0,023149 | <b>-0,394604</b>  | 1471 | 2116 | <b>1793,5</b> |
| CRY1     | -0,394371 | NaN       | <b>-0,394371</b>  | 2120 | NaN  | <b>2120</b>   |
| RREB1    | -0,263406 | -0,524897 | <b>-0,3941515</b> | 1650 | 3013 | <b>2331,5</b> |

|           |           |           |                   |      |      |               |
|-----------|-----------|-----------|-------------------|------|------|---------------|
| DAPK3     | -0,541311 | -0,24691  | <b>-0,3941105</b> | 1539 | 2270 | <b>1904,5</b> |
| ATXN7L3B  | 0,097579  | -0,885288 | <b>-0,3938545</b> | 1667 | 1827 | <b>1747</b>   |
| PNO1      | 0,354108  | -1,140875 | <b>-0,3933835</b> | 1359 | 1667 | <b>1513</b>   |
| ZNF341    | -1,092758 | 0,306479  | <b>-0,3931395</b> | 1361 | 2178 | <b>1769,5</b> |
| WBP4      | -0,393079 | NaN       | <b>-0,393079</b>  | 1372 | NaN  | <b>1372</b>   |
| KLHL26    | -0,392744 | NaN       | <b>-0,392744</b>  | 1835 | NaN  | <b>1835</b>   |
| MFSD6L    | -0,554454 | -0,23046  | <b>-0,392457</b>  | 1726 | 1432 | <b>1579</b>   |
| KIF25     | -0,593378 | -0,191385 | <b>-0,3923815</b> | 1577 | 1856 | <b>1716,5</b> |
| DEFB123   | -0,128841 | -0,655805 | <b>-0,392323</b>  | 1341 | 1527 | <b>1434</b>   |
| TFB1M     | -0,425372 | -0,35922  | <b>-0,392296</b>  | 1517 | 1482 | <b>1499,5</b> |
| INO80E    | -0,392234 | NaN       | <b>-0,392234</b>  | 1436 | NaN  | <b>1436</b>   |
| TERT      | -0,352094 | -0,432119 | <b>-0,3921065</b> | 1640 | 2785 | <b>2212,5</b> |
| TUBB      | 0,10197   | -0,885925 | <b>-0,3919775</b> | 1744 | 2055 | <b>1899,5</b> |
| TSPAN15   | -0,391847 | NaN       | <b>-0,391847</b>  | 1704 | NaN  | <b>1704</b>   |
| RNF41     | -0,447288 | -0,336356 | <b>-0,391822</b>  | 1699 | 2111 | <b>1905</b>   |
| SLC25A11  | -0,895456 | 0,11182   | <b>-0,391818</b>  | 1518 | 2060 | <b>1789</b>   |
| TRPC4     | -1,328812 | 0,545399  | <b>-0,3917065</b> | 1910 | 2127 | <b>2018,5</b> |
| CPVL      | -0,535209 | -0,247999 | <b>-0,391604</b>  | 1367 | 2444 | <b>1905,5</b> |
| CDX1      | 0,039948  | -0,823069 | <b>-0,3915605</b> | 1716 | 2414 | <b>2065</b>   |
| C1GALT1C1 | -0,139538 | -0,643495 | <b>-0,3915165</b> | 1675 | 2276 | <b>1975,5</b> |
| CNPY2     | -0,64567  | -0,136985 | <b>-0,3913275</b> | 1576 | 1888 | <b>1732</b>   |
| KREMEN2   | -0,70089  | -0,081518 | <b>-0,391204</b>  | 1778 | 1961 | <b>1869,5</b> |
| EPHX2     | 0,488914  | -1,271088 | <b>-0,391087</b>  | 1746 | 1984 | <b>1865</b>   |
| ITK       | -1,049657 | 0,267789  | <b>-0,390934</b>  | 2094 | 1719 | <b>1906,5</b> |
| FSCB      | 0,229695  | -1,011549 | <b>-0,390927</b>  | 1832 | 2340 | <b>2086</b>   |
| C9orf123  | -0,390893 | NaN       | <b>-0,390893</b>  | 1688 | NaN  | <b>1688</b>   |
| OR8K3     | -0,390813 | NaN       | <b>-0,390813</b>  | 1491 | NaN  | <b>1491</b>   |
| NXT1      | 0,005964  | -0,78745  | <b>-0,390743</b>  | 1152 | 1560 | <b>1356</b>   |
| BARHL2    | -0,955153 | 0,174131  | <b>-0,390511</b>  | 1365 | 1753 | <b>1559</b>   |
| LAMA1     | -0,390328 | NaN       | <b>-0,390328</b>  | 1364 | NaN  | <b>1364</b>   |
| AGBL2     | -0,21191  | -0,568466 | <b>-0,390188</b>  | 1543 | 1806 | <b>1674,5</b> |
| SATB1     | 0,269147  | -1,049338 | <b>-0,3900955</b> | 1890 | 1897 | <b>1893,5</b> |
| HTRA3     | 0,428353  | -1,208171 | <b>-0,389909</b>  | 1067 | 1899 | <b>1483</b>   |
| IMPACT    | -0,389567 | NaN       | <b>-0,389567</b>  | 1268 | NaN  | <b>1268</b>   |

|           |           |           |                   |      |      |               |
|-----------|-----------|-----------|-------------------|------|------|---------------|
| HCFC1R1   | 0,782957  | -1,561311 | <b>-0,389177</b>  | 1341 | 1369 | <b>1355</b>   |
| DHRS3     | -0,301776 | -0,47648  | <b>-0,389128</b>  | 1065 | 1714 | <b>1389,5</b> |
| CNPY3     | -0,389092 | NaN       | <b>-0,389092</b>  | 1253 | NaN  | <b>1253</b>   |
| ZNF833P   | -0,284536 | -0,493585 | <b>-0,3890605</b> | 1390 | 1791 | <b>1590,5</b> |
| RET       | -0,267493 | -0,510376 | <b>-0,3889345</b> | 1731 | 2072 | <b>1901,5</b> |
| ABCB9     | -0,697204 | -0,080259 | <b>-0,3887315</b> | 983  | 1297 | <b>1140</b>   |
| STK39     | -0,79099  | 0,014012  | <b>-0,388489</b>  | 1926 | 1830 | <b>1878</b>   |
| NKIRAS2   | -0,920659 | 0,14517   | <b>-0,3877445</b> | 1716 | 2042 | <b>1879</b>   |
| HOMER3    | -0,387411 | NaN       | <b>-0,387411</b>  | 1451 | NaN  | <b>1451</b>   |
| ULK4      | -0,98552  | 0,21197   | <b>-0,386775</b>  | 1965 | 2348 | <b>2156,5</b> |
| NDUFS2    | -0,926323 | 0,152932  | <b>-0,3866955</b> | 1579 | 2318 | <b>1948,5</b> |
| BICC1     | -0,385693 | NaN       | <b>-0,385693</b>  | 1638 | NaN  | <b>1638</b>   |
| BATF3     | -0,556165 | -0,214577 | <b>-0,385371</b>  | 1136 | 1498 | <b>1317</b>   |
| MNT       | -0,189416 | -0,580832 | <b>-0,385124</b>  | 1857 | 2271 | <b>2064</b>   |
| BRI3      | 0,058205  | -0,828294 | <b>-0,3850445</b> | 1911 | 3137 | <b>2524</b>   |
| PAPOLA    | 0,119685  | -0,88961  | <b>-0,3849625</b> | 1404 | 2388 | <b>1896</b>   |
| NLGN2     | 0,053966  | -0,823633 | <b>-0,3848335</b> | 1803 | 1710 | <b>1756,5</b> |
| DSCR3     | -0,575556 | -0,193972 | <b>-0,384764</b>  | 1600 | 2309 | <b>1954,5</b> |
| LINC00173 | -0,805238 | 0,03577   | <b>-0,384734</b>  | 1291 | 2436 | <b>1863,5</b> |
| ERP29     | -0,384524 | NaN       | <b>-0,384524</b>  | 2000 | NaN  | <b>2000</b>   |
| RSBN1     | -0,573407 | -0,195034 | <b>-0,3842205</b> | 1318 | 2092 | <b>1705</b>   |
| MYT1      | -0,509992 | -0,257923 | <b>-0,3839575</b> | 1804 | 2252 | <b>2028</b>   |
| SUGP1     | 0,328163  | -1,095827 | <b>-0,383832</b>  | 1416 | 1334 | <b>1375</b>   |
| RBM41     | -0,343581 | -0,424044 | <b>-0,3838125</b> | 1792 | 3096 | <b>2444</b>   |
| GNG7      | -0,383608 | NaN       | <b>-0,383608</b>  | 1386 | NaN  | <b>1386</b>   |
| UBA52     | -0,289494 | -0,477486 | <b>-0,38349</b>   | 1037 | 1140 | <b>1088,5</b> |
| SLC34A3   | 0,090838  | -0,857233 | <b>-0,3831975</b> | 1831 | 2601 | <b>2216</b>   |
| S100A7A   | -0,026911 | -0,738945 | <b>-0,382928</b>  | 1188 | 2092 | <b>1640</b>   |
| TSSC4     | -0,382912 | NaN       | <b>-0,382912</b>  | 1911 | NaN  | <b>1911</b>   |
| PRPS1     | -1,00244  | 0,236625  | <b>-0,3829075</b> | 1603 | 1954 | <b>1778,5</b> |
| C1orf74   | -0,618163 | -0,146439 | <b>-0,382301</b>  | 1593 | 2291 | <b>1942</b>   |
| EID3      | -0,158291 | -0,606156 | <b>-0,3822235</b> | 1693 | 1693 | <b>1693</b>   |
| ACTL7B    | -0,382061 | NaN       | <b>-0,382061</b>  | 1631 | NaN  | <b>1631</b>   |
| SYN1      | -0,463831 | -0,300213 | <b>-0,382022</b>  | 1889 | 2413 | <b>2151</b>   |

|          |           |           |                   |      |      |               |
|----------|-----------|-----------|-------------------|------|------|---------------|
| CLIP2    | -0,733336 | -0,030117 | <b>-0,3817265</b> | 1947 | 1862 | <b>1904,5</b> |
| CHST7    | -0,354748 | -0,408122 | <b>-0,381435</b>  | 1224 | 1951 | <b>1587,5</b> |
| PAPD7    | -0,305201 | -0,457469 | <b>-0,381335</b>  | 2293 | 2297 | <b>2295</b>   |
| SLC22A5  | NaN       | -0,381239 | <b>-0,381239</b>  | NaN  | 1413 | <b>1413</b>   |
| RGS13    | -0,380652 | NaN       | <b>-0,380652</b>  | 1401 | NaN  | <b>1401</b>   |
| ROM1     | -0,486457 | -0,274787 | <b>-0,380622</b>  | 1711 | 1863 | <b>1787</b>   |
| WNT8B    | -0,12521  | -0,636025 | <b>-0,3806175</b> | 1509 | 1810 | <b>1659,5</b> |
| ZNF790   | -0,380499 | NaN       | <b>-0,380499</b>  | 1596 | NaN  | <b>1596</b>   |
| OR7C2    | -0,38047  | NaN       | <b>-0,38047</b>   | 1595 | NaN  | <b>1595</b>   |
| H2AFY    | -0,391549 | -0,369063 | <b>-0,380306</b>  | 1296 | 1983 | <b>1639,5</b> |
| KCTD13   | -0,604992 | -0,155231 | <b>-0,3801115</b> | 1501 | 2994 | <b>2247,5</b> |
| CA14     | -0,038691 | -0,721365 | <b>-0,380028</b>  | 1939 | 2630 | <b>2284,5</b> |
| ZNF30    | -0,07613  | -0,683572 | <b>-0,379851</b>  | 1813 | 2260 | <b>2036,5</b> |
| GRASP    | 0,292136  | -1,051612 | <b>-0,379738</b>  | 1722 | 2835 | <b>2278,5</b> |
| ZNF423   | -0,038105 | -0,721016 | <b>-0,3795605</b> | 1809 | 2201 | <b>2005</b>   |
| PSMA5    | -0,595487 | -0,163478 | <b>-0,3794825</b> | 1968 | 2156 | <b>2062</b>   |
| CILP2    | -0,124371 | -0,634414 | <b>-0,3793925</b> | 1326 | 1536 | <b>1431</b>   |
| KIAA1530 | -0,737093 | -0,021403 | <b>-0,379248</b>  | 1751 | 2121 | <b>1936</b>   |
| SNX24    | -1,032607 | 0,274127  | <b>-0,37924</b>   | 1592 | 1661 | <b>1626,5</b> |
| ITGA2    | -0,490755 | -0,266899 | <b>-0,378827</b>  | 1370 | 1459 | <b>1414,5</b> |
| C5orf48  | -0,535591 | -0,222059 | <b>-0,378825</b>  | 1438 | 2758 | <b>2098</b>   |
| ABHD16B  | -0,530637 | -0,226952 | <b>-0,3787945</b> | 1319 | 1880 | <b>1599,5</b> |
| STAM     | -0,378752 | NaN       | <b>-0,378752</b>  | 537  | NaN  | <b>537</b>    |
| CDR1     | -1,653612 | 0,896196  | <b>-0,378708</b>  | 2003 | 1620 | <b>1811,5</b> |
| MTHFD1L  | -0,618829 | -0,138192 | <b>-0,3785105</b> | 1603 | 3020 | <b>2311,5</b> |
| UROS     | 0,19228   | -0,948588 | <b>-0,378154</b>  | 1451 | 1778 | <b>1614,5</b> |
| VSX2     | -0,378077 | NaN       | <b>-0,378077</b>  | 1559 | NaN  | <b>1559</b>   |
| XYLT2    | 0,21015   | -0,966257 | <b>-0,3780535</b> | 1509 | 1693 | <b>1601</b>   |
| TCEA1    | NaN       | -0,378036 | <b>-0,378036</b>  | NaN  | 2585 | <b>2585</b>   |
| REPS1    | -0,220452 | -0,53556  | <b>-0,378006</b>  | 1798 | 1882 | <b>1840</b>   |
| BMP8B    | -0,700877 | -0,05504  | <b>-0,3779585</b> | 1815 | 2658 | <b>2236,5</b> |
| HCRTR1   | -0,377957 | NaN       | <b>-0,377957</b>  | 1668 | NaN  | <b>1668</b>   |
| GNB2     | 0,209717  | -0,965535 | <b>-0,377909</b>  | 1233 | 2001 | <b>1617</b>   |
| MCM8     | -0,682506 | -0,071867 | <b>-0,3771865</b> | 2011 | 2866 | <b>2438,5</b> |

|          |           |           |                   |      |      |               |
|----------|-----------|-----------|-------------------|------|------|---------------|
| WDR12    | -1,404052 | 0,649783  | <b>-0,3771345</b> | 1441 | 1232 | <b>1336,5</b> |
| AKAP13   | -0,919403 | 0,165256  | <b>-0,3770735</b> | 1822 | 1896 | <b>1859</b>   |
| TIMELESS | -0,79134  | 0,037232  | <b>-0,377054</b>  | 1262 | 1657 | <b>1459,5</b> |
| PLOD2    | -0,574912 | -0,178949 | <b>-0,3769305</b> | 1246 | 1370 | <b>1308</b>   |
| CCDC7    | -0,662047 | -0,091263 | <b>-0,376655</b>  | 1776 | 2144 | <b>1960</b>   |
| MTA3     | -0,376466 | NaN       | <b>-0,376466</b>  | 1712 | NaN  | <b>1712</b>   |
| SNAPC1   | -1,083035 | 0,330423  | <b>-0,376306</b>  | 1438 | 1812 | <b>1625</b>   |
| ADRBK1   | -0,579413 | -0,173019 | <b>-0,376216</b>  | 1840 | 1817 | <b>1828,5</b> |
| FBXO4    | 0,168046  | -0,920423 | <b>-0,3761885</b> | 1789 | 2856 | <b>2322,5</b> |
| GSTP1    | -0,221558 | -0,530797 | <b>-0,3761775</b> | 1318 | 1962 | <b>1640</b>   |
| SLC4A3   | -1,441998 | 0,689731  | <b>-0,3761335</b> | 1993 | 2468 | <b>2230,5</b> |
| PCDHGA4  | -2,071248 | 1,3192    | <b>-0,376024</b>  | 1339 | 1598 | <b>1468,5</b> |
| SH3GLB2  | -0,47915  | -0,272352 | <b>-0,375751</b>  | 1537 | 1793 | <b>1665</b>   |
| BCL3     | -0,45681  | -0,293591 | <b>-0,3752005</b> | 1180 | 1683 | <b>1431,5</b> |
| CHRNB4   | -0,147745 | -0,602526 | <b>-0,3751355</b> | 2010 | 2282 | <b>2146</b>   |
| LPHN3    | -0,375121 | NaN       | <b>-0,375121</b>  | 2264 | NaN  | <b>2264</b>   |
| CHAD     | -0,068452 | -0,681366 | <b>-0,374909</b>  | 1535 | 1960 | <b>1747,5</b> |
| TMEM201  | -0,027216 | -0,722029 | <b>-0,3746225</b> | 975  | 1610 | <b>1292,5</b> |
| CLEC16A  | -0,31327  | -0,43573  | <b>-0,3745</b>    | 1702 | 1997 | <b>1849,5</b> |
| CELA3A   | -0,566255 | -0,181893 | <b>-0,374074</b>  | 1200 | 1756 | <b>1478</b>   |
| ADA      | -1,042889 | 0,295125  | <b>-0,373882</b>  | 1946 | 2549 | <b>2247,5</b> |
| CDC42EP5 | 0,070367  | -0,817327 | <b>-0,37348</b>   | 1773 | 1712 | <b>1742,5</b> |
| CC2D2A   | -0,373433 | NaN       | <b>-0,373433</b>  | 1983 | NaN  | <b>1983</b>   |
| CUBN     | -0,307433 | -0,439356 | <b>-0,3733945</b> | 1843 | 2267 | <b>2055</b>   |
| PPAPDC1A | -0,281781 | -0,464825 | <b>-0,373303</b>  | 1271 | 2098 | <b>1684,5</b> |
| CD209    | -0,121882 | -0,624301 | <b>-0,3730915</b> | 1522 | 2241 | <b>1881,5</b> |
| CHRD     | -0,477459 | -0,266789 | <b>-0,372124</b>  | 1521 | 1763 | <b>1642</b>   |
| ARL6     | -0,097745 | -0,64617  | <b>-0,3719575</b> | 660  | 1759 | <b>1209,5</b> |
| ALAD     | -0,351103 | -0,392425 | <b>-0,371764</b>  | 1829 | 2065 | <b>1947</b>   |
| LRP10    | -0,47993  | -0,263016 | <b>-0,371473</b>  | 1278 | 2143 | <b>1710,5</b> |
| BAI3     | -0,371459 | NaN       | <b>-0,371459</b>  | 1683 | NaN  | <b>1683</b>   |
| IKBKE    | 1,032098  | -1,774512 | <b>-0,371207</b>  | 1559 | 2039 | <b>1799</b>   |
| PPFIBP1  | -0,399319 | -0,342415 | <b>-0,370867</b>  | 1643 | 2442 | <b>2042,5</b> |
| CYP4F11  | NaN       | -0,370814 | <b>-0,370814</b>  | NaN  | 2012 | <b>2012</b>   |

|           |           |           |                   |      |      |               |
|-----------|-----------|-----------|-------------------|------|------|---------------|
| CTAGE5    | -0,370519 | NaN       | <b>-0,370519</b>  | 1813 | NaN  | <b>1813</b>   |
| PCDHGA5   | -0,097933 | -0,643102 | <b>-0,3705175</b> | 945  | 1481 | <b>1213</b>   |
| GFI1      | -0,226909 | -0,513988 | <b>-0,3704485</b> | 1765 | 2303 | <b>2034</b>   |
| HN1       | -0,129943 | -0,610312 | <b>-0,3701275</b> | 2230 | 2229 | <b>2229,5</b> |
| TUSC1     | -0,530122 | -0,210115 | <b>-0,3701185</b> | 1677 | 2691 | <b>2184</b>   |
| MYO5A     | -0,276481 | -0,463749 | <b>-0,370115</b>  | 2358 | 2203 | <b>2280,5</b> |
| TMEM65    | -0,103429 | -0,636708 | <b>-0,3700685</b> | 1870 | 2105 | <b>1987,5</b> |
| MAP6D1    | -0,369895 | NaN       | <b>-0,369895</b>  | 1434 | NaN  | <b>1434</b>   |
| LRRC16B   | -0,369854 | NaN       | <b>-0,369854</b>  | 1500 | NaN  | <b>1500</b>   |
| SLC38A5   | -0,556224 | -0,182668 | <b>-0,369446</b>  | 1867 | 1792 | <b>1829,5</b> |
| ZNF828    | -0,132001 | -0,606527 | <b>-0,369264</b>  | 1873 | 2033 | <b>1953</b>   |
| C1orf88   | -0,915023 | 0,176825  | <b>-0,369099</b>  | 1416 | 2224 | <b>1820</b>   |
| FXVD1     | -0,178938 | -0,558116 | <b>-0,368527</b>  | 1858 | 1934 | <b>1896</b>   |
| TMEM174   | -0,368375 | NaN       | <b>-0,368375</b>  | 1131 | NaN  | <b>1131</b>   |
| ZBTB45    | 0,223212  | -0,959717 | <b>-0,3682525</b> | 1789 | 2225 | <b>2007</b>   |
| RNF13     | -0,446627 | -0,289796 | <b>-0,3682115</b> | 1773 | 1811 | <b>1792</b>   |
| PRDM11    | -0,408821 | -0,327369 | <b>-0,368095</b>  | 1453 | 1645 | <b>1549</b>   |
| LOC401052 | -0,368016 | NaN       | <b>-0,368016</b>  | 1515 | NaN  | <b>1515</b>   |
| CABP4     | -0,60587  | -0,129981 | <b>-0,3679255</b> | 1626 | 1877 | <b>1751,5</b> |
| NTNG1     | 0,414942  | -1,150457 | <b>-0,3677575</b> | 1966 | 2017 | <b>1991,5</b> |
| DUS2L     | -0,181509 | -0,553679 | <b>-0,367594</b>  | 1882 | 1679 | <b>1780,5</b> |
| COMT      | 0,131628  | -0,866512 | <b>-0,367442</b>  | 1536 | 2044 | <b>1790</b>   |
| CCDC97    | 0,186035  | -0,920892 | <b>-0,3674285</b> | 1597 | 1742 | <b>1669,5</b> |
| PFDN2     | -0,367402 | NaN       | <b>-0,367402</b>  | 1642 | NaN  | <b>1642</b>   |
| SETD6     | -0,321625 | -0,413139 | <b>-0,367382</b>  | 1692 | 2063 | <b>1877,5</b> |
| SLC13A4   | 0,09899   | -0,833347 | <b>-0,3671785</b> | 1501 | 2055 | <b>1778</b>   |
| MPRIP     | -0,22935  | -0,504812 | <b>-0,367081</b>  | 1270 | 2131 | <b>1700,5</b> |
| TRIM38    | -0,451616 | -0,282487 | <b>-0,3670515</b> | 2113 | 2393 | <b>2253</b>   |
| FBXL5     | -0,350272 | -0,383239 | <b>-0,3667555</b> | 1733 | 2317 | <b>2025</b>   |
| SPIB      | -1,244569 | 0,511469  | <b>-0,36655</b>   | 1730 | 1959 | <b>1844,5</b> |
| CLEC4A    | -0,366293 | NaN       | <b>-0,366293</b>  | 1087 | NaN  | <b>1087</b>   |
| TMCO5A    | -0,366195 | NaN       | <b>-0,366195</b>  | 1314 | NaN  | <b>1314</b>   |
| CYP4F22   | 0,270348  | -1,002457 | <b>-0,3660545</b> | 1217 | 2012 | <b>1614,5</b> |
| USP49     | -0,796681 | 0,064846  | <b>-0,3659175</b> | 1739 | 2003 | <b>1871</b>   |



|           |           |           |                   |      |      |               |
|-----------|-----------|-----------|-------------------|------|------|---------------|
| CTU2      | 0,147307  | -0,879082 | <b>-0,3658875</b> | 1357 | 1991 | <b>1674</b>   |
| LIPC      | -0,19816  | -0,53306  | <b>-0,36561</b>   | 1932 | 2241 | <b>2086,5</b> |
| MS4A2     | -0,168235 | -0,56247  | <b>-0,3653525</b> | 1077 | 1988 | <b>1532,5</b> |
| PHOX2A    | 0,233932  | -0,964637 | <b>-0,3653525</b> | 1542 | 2176 | <b>1859</b>   |
| ZNF570    | -0,786616 | 0,056364  | <b>-0,365126</b>  | 1108 | 1391 | <b>1249,5</b> |
| GNPNAT1   | -1,021504 | 0,291403  | <b>-0,3650505</b> | 1615 | 1993 | <b>1804</b>   |
| MEOX1     | -0,406586 | -0,323141 | <b>-0,3648635</b> | 1705 | 2111 | <b>1908</b>   |
| TMEM156   | -0,280582 | -0,449122 | <b>-0,364852</b>  | 1916 | 1824 | <b>1870</b>   |
| SUN3      | -0,364841 | NaN       | <b>-0,364841</b>  | 1344 | NaN  | <b>1344</b>   |
| SIPA1L3   | -0,929018 | 0,199346  | <b>-0,364836</b>  | 1360 | 1889 | <b>1624,5</b> |
| MYL6      | -0,257467 | -0,47215  | <b>-0,3648085</b> | 1973 | 1914 | <b>1943,5</b> |
| SLAMF9    | -0,342348 | -0,387041 | <b>-0,3646945</b> | 1796 | 1925 | <b>1860,5</b> |
| DOCK11    | -0,138999 | -0,590365 | <b>-0,364682</b>  | 1191 | 1907 | <b>1549</b>   |
| DPEP3     | -0,761051 | 0,031738  | <b>-0,3646565</b> | 1345 | 2053 | <b>1699</b>   |
| C9orf131  | -0,831926 | 0,102636  | <b>-0,364645</b>  | 1370 | 1882 | <b>1626</b>   |
| UGT8      | -1,216665 | 0,488116  | <b>-0,3642745</b> | 1259 | 1834 | <b>1546,5</b> |
| HTR3C     | 0,044895  | -0,773351 | <b>-0,364228</b>  | 1438 | 2781 | <b>2109,5</b> |
| DEF6      | -0,424461 | -0,30398  | <b>-0,3642205</b> | 1594 | 1785 | <b>1689,5</b> |
| EML1      | -0,741117 | 0,012796  | <b>-0,3641605</b> | 2100 | 1911 | <b>2005,5</b> |
| PHF19     | -0,456336 | -0,27191  | <b>-0,364123</b>  | 1580 | 1793 | <b>1686,5</b> |
| KCNJ9     | -0,459804 | -0,268204 | <b>-0,364004</b>  | 1956 | 2766 | <b>2361</b>   |
| ILDR2     | -0,152312 | -0,575482 | <b>-0,363897</b>  | 1596 | 1948 | <b>1772</b>   |
| BCHE      | -0,798983 | 0,072523  | <b>-0,36323</b>   | 1841 | 2560 | <b>2200,5</b> |
| SFTPC     | -0,618903 | -0,106588 | <b>-0,3627455</b> | 1569 | 1867 | <b>1718</b>   |
| CYB561D1  | -0,639639 | -0,085764 | <b>-0,3627015</b> | 1918 | 2294 | <b>2106</b>   |
| NT5C2     | -0,777451 | 0,05215   | <b>-0,3626505</b> | 1741 | 2015 | <b>1878</b>   |
| MED7      | -0,84573  | 0,120728  | <b>-0,362501</b>  | 1694 | 2014 | <b>1854</b>   |
| MTPAP     | -1,445666 | 0,720688  | <b>-0,362489</b>  | 1721 | 2056 | <b>1888,5</b> |
| TXNDC12   | -0,431932 | -0,292983 | <b>-0,3624575</b> | 1970 | 2089 | <b>2029,5</b> |
| NEFH      | 0,020012  | -0,744918 | <b>-0,362453</b>  | 1552 | 2223 | <b>1887,5</b> |
| IFNK      | -0,006407 | -0,718421 | <b>-0,362414</b>  | 2155 | 2462 | <b>2308,5</b> |
| TNFRSF10A | -0,570522 | -0,154213 | <b>-0,3623675</b> | 1329 | 1975 | <b>1652</b>   |
| GSTK1     | 1,604342  | -2,328961 | <b>-0,3623095</b> | 1172 | 1845 | <b>1508,5</b> |
| NMUR2     | -0,362305 | NaN       | <b>-0,362305</b>  | 1558 | NaN  | <b>1558</b>   |

|          |           |           |                   |      |      |               |
|----------|-----------|-----------|-------------------|------|------|---------------|
| GSTM3    | 0,014225  | -0,738655 | <b>-0,362215</b>  | 1245 | 2129 | <b>1687</b>   |
| FAM24A   | -0,67425  | -0,049378 | <b>-0,361814</b>  | 1300 | 2060 | <b>1680</b>   |
| CCT6B    | NaN       | -0,36171  | <b>-0,36171</b>   | NaN  | 2928 | <b>2928</b>   |
| WWC3     | -1,179342 | 0,456267  | <b>-0,3615375</b> | 1824 | 1974 | <b>1899</b>   |
| NF1      | 0,401104  | -1,122998 | <b>-0,360947</b>  | 1338 | 1363 | <b>1350,5</b> |
| USP24    | -0,666528 | -0,054611 | <b>-0,3605695</b> | 1734 | 2277 | <b>2005,5</b> |
| NOG      | -0,157299 | -0,56294  | <b>-0,3601195</b> | 1324 | 1522 | <b>1423</b>   |
| PRPH     | -1,010658 | 0,290439  | <b>-0,3601095</b> | 1843 | 2004 | <b>1923,5</b> |
| ACTL6B   | -0,437835 | -0,282069 | <b>-0,359952</b>  | 1569 | 1952 | <b>1760,5</b> |
| ICA1L    | 0,228638  | -0,948302 | <b>-0,359832</b>  | 1352 | 1914 | <b>1633</b>   |
| ARHGFB37 | 0,392172  | -1,111655 | <b>-0,3597415</b> | 1708 | 1605 | <b>1656,5</b> |
| UBE2N    | -0,485529 | -0,233784 | <b>-0,3596565</b> | 2097 | 2513 | <b>2305</b>   |
| HOXC9    | -0,237135 | -0,482092 | <b>-0,3596135</b> | 1632 | 1636 | <b>1634</b>   |
| RIPK3    | -0,842232 | 0,12324   | <b>-0,359496</b>  | 1642 | 2139 | <b>1890,5</b> |
| FBXL16   | -0,460593 | -0,257602 | <b>-0,3590975</b> | 1059 | 1969 | <b>1514</b>   |
| LZTR1    | 0,093228  | -0,811106 | <b>-0,358939</b>  | 892  | 1777 | <b>1334,5</b> |
| TPRA1    | -0,358927 | NaN       | <b>-0,358927</b>  | 1025 | NaN  | <b>1025</b>   |
| GPX1     | 0,348987  | -1,066815 | <b>-0,358914</b>  | 1171 | 2436 | <b>1803,5</b> |
| SH2B3    | -1,318414 | 0,600601  | <b>-0,3589065</b> | 1824 | 2725 | <b>2274,5</b> |
| HMHB1    | -0,632125 | -0,085432 | <b>-0,3587785</b> | 1966 | 1974 | <b>1970</b>   |
| THTPA    | -0,27904  | -0,43842  | <b>-0,35873</b>   | 1903 | 2217 | <b>2060</b>   |
| IGFN1    | -0,502276 | -0,21483  | <b>-0,358553</b>  | 1481 | 1736 | <b>1608,5</b> |
| AES      | -0,339367 | -0,37764  | <b>-0,3585035</b> | 1489 | 1804 | <b>1646,5</b> |
| TBX15    | -0,358317 | NaN       | <b>-0,358317</b>  | 1651 | NaN  | <b>1651</b>   |
| CR1      | -0,753523 | 0,03728   | <b>-0,3581215</b> | 732  | 1672 | <b>1202</b>   |
| GRPR     | -0,358033 | NaN       | <b>-0,358033</b>  | 1710 | NaN  | <b>1710</b>   |
| C14orf43 | -0,135412 | -0,580063 | <b>-0,3577375</b> | 1755 | 1657 | <b>1706</b>   |
| TMEM151B | -0,357733 | NaN       | <b>-0,357733</b>  | 1482 | NaN  | <b>1482</b>   |
| APOD     | 1,08795   | -1,803258 | <b>-0,357654</b>  | 1317 | 1733 | <b>1525</b>   |
| TSPAN7   | -0,357589 | NaN       | <b>-0,357589</b>  | 1708 | NaN  | <b>1708</b>   |
| KLHDC3   | 0,059045  | -0,773981 | <b>-0,357468</b>  | 1963 | 2116 | <b>2039,5</b> |
| VPS13C   | -0,486228 | -0,227768 | <b>-0,356998</b>  | 1419 | 2176 | <b>1797,5</b> |
| GREB1    | -1,040862 | 0,327307  | <b>-0,3567775</b> | 1621 | 1903 | <b>1762</b>   |
| CARD10   | -0,511376 | -0,202026 | <b>-0,356701</b>  | 1679 | 1970 | <b>1824,5</b> |

|          |           |           |                   |      |      |               |
|----------|-----------|-----------|-------------------|------|------|---------------|
| UPF1     | -0,131037 | -0,582147 | <b>-0,356592</b>  | 1775 | 1978 | <b>1876,5</b> |
| RDH13    | 0,231505  | -0,944596 | <b>-0,3565455</b> | 1582 | 1893 | <b>1737,5</b> |
| FBXL18   | -0,411119 | -0,301351 | <b>-0,356235</b>  | 1724 | 2250 | <b>1987</b>   |
| PLBD2    | 0,071133  | -0,783539 | <b>-0,356203</b>  | 1473 | 1495 | <b>1484</b>   |
| B4GALT7  | -0,206518 | -0,505265 | <b>-0,3558915</b> | 1657 | 1791 | <b>1724</b>   |
| ZNF781   | -0,355848 | NaN       | <b>-0,355848</b>  | 1820 | NaN  | <b>1820</b>   |
| LGALS12  | 0,277285  | -0,988381 | <b>-0,355548</b>  | 1985 | 2736 | <b>2360,5</b> |
| OLIG2    | NaN       | -0,355376 | <b>-0,355376</b>  | NaN  | 2321 | <b>2321</b>   |
| AGPAT2   | -0,305903 | -0,404822 | <b>-0,3553625</b> | 1476 | 1882 | <b>1679</b>   |
| LIX1L    | -0,355341 | NaN       | <b>-0,355341</b>  | 1605 | NaN  | <b>1605</b>   |
| KLHL9    | -0,78896  | 0,07849   | <b>-0,355235</b>  | 1687 | 1836 | <b>1761,5</b> |
| CTDSP2   | -0,395771 | -0,314452 | <b>-0,3551115</b> | 1624 | 2081 | <b>1852,5</b> |
| FAM167B  | -1,167297 | 0,457255  | <b>-0,355021</b>  | 2038 | 2608 | <b>2323</b>   |
| OR5M8    | -0,076947 | -0,633092 | <b>-0,3550195</b> | 1769 | 1929 | <b>1849</b>   |
| F2       | 0,351051  | -1,060994 | <b>-0,3549715</b> | 1596 | 2097 | <b>1846,5</b> |
| LNX1     | -1,104895 | 0,395406  | <b>-0,3547445</b> | 1698 | 2282 | <b>1990</b>   |
| OLFM4    | -0,259146 | -0,450332 | <b>-0,354739</b>  | 1351 | 2203 | <b>1777</b>   |
| RPL24    | 0,10633   | -0,815683 | <b>-0,3546765</b> | 875  | 1277 | <b>1076</b>   |
| PKD2     | -0,943971 | 0,234708  | <b>-0,3546315</b> | 1834 | 2384 | <b>2109</b>   |
| LRFN2    | -0,022061 | -0,68649  | <b>-0,3542755</b> | 1823 | 2176 | <b>1999,5</b> |
| UBR2     | -0,609319 | -0,098779 | <b>-0,354049</b>  | 1713 | 2950 | <b>2331,5</b> |
| WBSCR22  | -0,063409 | -0,644524 | <b>-0,3539665</b> | 1827 | 2498 | <b>2162,5</b> |
| ANK1     | -0,353921 | NaN       | <b>-0,353921</b>  | 2144 | NaN  | <b>2144</b>   |
| GJB2     | -1,204163 | 0,49753   | <b>-0,3533165</b> | 1910 | 2853 | <b>2381,5</b> |
| CCRL2    | -0,353171 | NaN       | <b>-0,353171</b>  | 1339 | NaN  | <b>1339</b>   |
| C9orf16  | -0,323997 | -0,381949 | <b>-0,352973</b>  | 1689 | 1737 | <b>1713</b>   |
| OTOP1    | -0,352929 | NaN       | <b>-0,352929</b>  | 1705 | NaN  | <b>1705</b>   |
| NHLRC3   | -0,352808 | NaN       | <b>-0,352808</b>  | 1916 | NaN  | <b>1916</b>   |
| FAM9C    | -0,881525 | 0,177048  | <b>-0,3522385</b> | 1455 | 1707 | <b>1581</b>   |
| C11orf31 | 0,139236  | -0,843614 | <b>-0,352189</b>  | 1474 | 2194 | <b>1834</b>   |
| BAAT     | -0,04981  | -0,65445  | <b>-0,35213</b>   | 1780 | 2671 | <b>2225,5</b> |
| TPPP2    | -0,35195  | NaN       | <b>-0,35195</b>   | 1522 | NaN  | <b>1522</b>   |
| POMT2    | NaN       | -0,351682 | <b>-0,351682</b>  | NaN  | 2858 | <b>2858</b>   |
| TMPPRS7  | -0,39728  | -0,304971 | <b>-0,3511255</b> | 1666 | 2275 | <b>1970,5</b> |

|          |           |           |                   |      |      |               |
|----------|-----------|-----------|-------------------|------|------|---------------|
| NDUFA7   | 0,116987  | -0,818256 | <b>-0,3506345</b> | 1224 | 1987 | <b>1605,5</b> |
| CYB5R4   | -0,622562 | -0,078662 | <b>-0,350612</b>  | 1072 | 1888 | <b>1480</b>   |
| ELOVL2   | -0,044885 | -0,655902 | <b>-0,3503935</b> | 1504 | 1702 | <b>1603</b>   |
| KYNU     | -0,362059 | -0,338711 | <b>-0,350385</b>  | 1489 | 1995 | <b>1742</b>   |
| CORO1A   | -0,350134 | NaN       | <b>-0,350134</b>  | 1774 | NaN  | <b>1774</b>   |
| ZNF425   | 0,092454  | -0,792701 | <b>-0,3501235</b> | 1466 | 2279 | <b>1872,5</b> |
| C9orf64  | -0,658264 | -0,040971 | <b>-0,3496175</b> | 1662 | 2414 | <b>2038</b>   |
| SNRPA    | -0,406405 | -0,292497 | <b>-0,349451</b>  | 1068 | 1819 | <b>1443,5</b> |
| SERPINA3 | -0,757444 | 0,058753  | <b>-0,3493455</b> | 1739 | 2022 | <b>1880,5</b> |
| DNAH5    | -0,790545 | 0,09275   | <b>-0,3488975</b> | 1719 | 1679 | <b>1699</b>   |
| NDFIP2   | -0,067168 | -0,630531 | <b>-0,3488495</b> | 1709 | 1611 | <b>1660</b>   |
| RPL6     | 0,056932  | -0,754622 | <b>-0,348845</b>  | 1065 | 790  | <b>927,5</b>  |
| ADCY9    | -0,572433 | -0,125031 | <b>-0,348732</b>  | 784  | 1523 | <b>1153,5</b> |
| KCTD17   | -0,201877 | -0,495175 | <b>-0,348526</b>  | 1275 | 1439 | <b>1357</b>   |
| TWF2     | 0,056093  | -0,752495 | <b>-0,348201</b>  | 693  | 898  | <b>795,5</b>  |
| GJC2     | -1,210536 | 0,5147    | <b>-0,347918</b>  | 1583 | 1753 | <b>1668</b>   |
| UFSP1    | -0,529286 | -0,166546 | <b>-0,347916</b>  | 1430 | 1203 | <b>1316,5</b> |
| LOXL3    | 0,07915   | -0,77474  | <b>-0,347795</b>  | 1889 | 2866 | <b>2377,5</b> |
| NTF4     | 0,091576  | -0,786973 | <b>-0,3476985</b> | 1476 | 1636 | <b>1556</b>   |
| C9orf21  | -0,486058 | -0,207618 | <b>-0,346838</b>  | 937  | 1857 | <b>1397</b>   |
| NPFFR2   | -0,885059 | 0,191534  | <b>-0,3467625</b> | 2193 | 2037 | <b>2115</b>   |
| TNFSF13B | -1,006451 | 0,31304   | <b>-0,3467055</b> | 1528 | 2194 | <b>1861</b>   |
| ZNHIT2   | -0,346637 | NaN       | <b>-0,346637</b>  | 1673 | NaN  | <b>1673</b>   |
| TOLLIP   | -0,320636 | -0,371602 | <b>-0,346119</b>  | 1730 | 2344 | <b>2037</b>   |
| C6orf221 | -0,000472 | -0,691662 | <b>-0,346067</b>  | 1671 | 2363 | <b>2017</b>   |
| GPR151   | -0,345939 | NaN       | <b>-0,345939</b>  | 1822 | NaN  | <b>1822</b>   |
| CNOT7    | -0,569772 | -0,121987 | <b>-0,3458795</b> | 1844 | 2353 | <b>2098,5</b> |
| STX2     | -0,068637 | -0,622947 | <b>-0,345792</b>  | 1246 | 1372 | <b>1309</b>   |
| CPSF3L   | -0,345716 | NaN       | <b>-0,345716</b>  | 1640 | NaN  | <b>1640</b>   |
| SLC39A14 | -1,009179 | 0,318076  | <b>-0,3455515</b> | 995  | 1095 | <b>1045</b>   |
| ZNF12    | -0,999869 | 0,309399  | <b>-0,345235</b>  | 2124 | 2280 | <b>2202</b>   |
| ZNF92    | -0,462302 | -0,22809  | <b>-0,345196</b>  | 2139 | 1949 | <b>2044</b>   |
| PFKFB2   | -0,004693 | -0,685499 | <b>-0,345096</b>  | 1189 | 1610 | <b>1399,5</b> |
| CAPZA3   | -0,252935 | -0,436786 | <b>-0,3448605</b> | 1751 | 2753 | <b>2252</b>   |

|          |           |           |                   |      |      |               |
|----------|-----------|-----------|-------------------|------|------|---------------|
| VN1R1    | -0,344826 | NaN       | <b>-0,344826</b>  | 1819 | NaN  | <b>1819</b>   |
| ACOT6    | -0,205384 | -0,484035 | <b>-0,3447095</b> | 1689 | 2283 | <b>1986</b>   |
| TMEM8C   | 0,123652  | -0,812719 | <b>-0,3445335</b> | 1890 | 2179 | <b>2034,5</b> |
| RHOH     | -0,046363 | -0,642566 | <b>-0,3444645</b> | 1614 | 2205 | <b>1909,5</b> |
| USP11    | -0,705554 | 0,016747  | <b>-0,3444035</b> | 1891 | 1616 | <b>1753,5</b> |
| AKAP7    | -0,700518 | 0,011874  | <b>-0,344322</b>  | 1414 | 1715 | <b>1564,5</b> |
| B4GALNT4 | -0,15779  | -0,530587 | <b>-0,3441885</b> | 1688 | 1677 | <b>1682,5</b> |
| SEMA3B   | -0,58446  | -0,103519 | <b>-0,3439895</b> | 1408 | 1476 | <b>1442</b>   |
| APOF     | -0,263596 | -0,423996 | <b>-0,343796</b>  | 1656 | 2588 | <b>2122</b>   |
| ADM2     | -0,488856 | -0,198452 | <b>-0,343654</b>  | 1109 | 1717 | <b>1413</b>   |
| SYPL2    | -0,563234 | -0,123601 | <b>-0,3434175</b> | 1129 | 1519 | <b>1324</b>   |
| NDUFV1   | -0,376124 | -0,310459 | <b>-0,3432915</b> | 1526 | 2174 | <b>1850</b>   |
| MYL6B    | -0,004104 | -0,682243 | <b>-0,3431735</b> | 1298 | 2082 | <b>1690</b>   |
| B3GALT4  | -0,248729 | -0,43755  | <b>-0,3431395</b> | 1691 | 2057 | <b>1874</b>   |
| CENPT    | -0,600124 | -0,085787 | <b>-0,3429555</b> | 1328 | 1379 | <b>1353,5</b> |
| TUBD1    | 0,102698  | -0,788606 | <b>-0,342954</b>  | 2272 | 2510 | <b>2391</b>   |
| GMEB2    | -0,526698 | -0,159127 | <b>-0,3429125</b> | 1664 | 1966 | <b>1815</b>   |
| SLC13A3  | -0,112929 | -0,572661 | <b>-0,342795</b>  | 1535 | 2015 | <b>1775</b>   |
| EIF1AX   | -0,572714 | -0,112446 | <b>-0,34258</b>   | 991  | 1709 | <b>1350</b>   |
| VPRBP    | -0,246023 | -0,437987 | <b>-0,342005</b>  | 1021 | 913  | <b>967</b>    |
| ZNF84    | 0,641728  | -1,324854 | <b>-0,341563</b>  | 1509 | 2051 | <b>1780</b>   |
| CCNB3    | -0,231458 | -0,451552 | <b>-0,341505</b>  | 2050 | 2301 | <b>2175,5</b> |
| C15orf56 | 0,017635  | -0,700571 | <b>-0,341468</b>  | 1311 | 1486 | <b>1398,5</b> |
| PTPRN    | 0,235693  | -0,917794 | <b>-0,3410505</b> | 986  | 1745 | <b>1365,5</b> |
| SHISA4   | -0,340888 | NaN       | <b>-0,340888</b>  | 1807 | NaN  | <b>1807</b>   |
| STIM2    | 0,041053  | -0,722064 | <b>-0,3405055</b> | 1295 | 2247 | <b>1771</b>   |
| MLKL     | -0,096876 | -0,583904 | <b>-0,34039</b>   | 1533 | 1596 | <b>1564,5</b> |
| KDELR1   | 0,923885  | -1,604543 | <b>-0,340329</b>  | 1634 | 1838 | <b>1736</b>   |
| CNOT10   | -0,340259 | NaN       | <b>-0,340259</b>  | 1802 | NaN  | <b>1802</b>   |
| TSGA10IP | -0,188004 | -0,492293 | <b>-0,3401485</b> | 1525 | 1912 | <b>1718,5</b> |
| SPACA3   | 0,983276  | -1,663278 | <b>-0,340001</b>  | 1189 | 1949 | <b>1569</b>   |
| ZBTB7B   | 0,491869  | -1,171659 | <b>-0,339895</b>  | 1772 | 2190 | <b>1981</b>   |
| SCOC     | -0,208525 | -0,471109 | <b>-0,339817</b>  | 2106 | 2106 | <b>2106</b>   |
| FUT10    | 0,015269  | -0,694391 | <b>-0,339561</b>  | 1683 | 2016 | <b>1849,5</b> |

|              |           |           |                   |      |      |               |
|--------------|-----------|-----------|-------------------|------|------|---------------|
| DKFZp761E198 | -0,896144 | 0,217036  | <b>-0,339554</b>  | 1867 | 2057 | <b>1962</b>   |
| NAT10        | -0,38662  | -0,292149 | <b>-0,3393845</b> | 2113 | 3215 | <b>2664</b>   |
| ZNF682       | -0,339295 | NaN       | <b>-0,339295</b>  | 1337 | NaN  | <b>1337</b>   |
| GOLPH3L      | -0,339246 | NaN       | <b>-0,339246</b>  | 1886 | NaN  | <b>1886</b>   |
| LOXL4        | 0,372874  | -1,051216 | <b>-0,339171</b>  | 1888 | 2327 | <b>2107,5</b> |
| PET112       | NaN       | -0,339162 | <b>-0,339162</b>  | NaN  | 1765 | <b>1765</b>   |
| PCDHB7       | -0,001401 | -0,676547 | <b>-0,338974</b>  | 1704 | 1719 | <b>1711,5</b> |
| NNT          | 0,217944  | -0,895225 | <b>-0,3386405</b> | 1353 | 2129 | <b>1741</b>   |
| ALS2CR8      | -0,111546 | -0,565706 | <b>-0,338626</b>  | 1757 | 2335 | <b>2046</b>   |
| PNMA2        | 0,557299  | -1,23453  | <b>-0,3386155</b> | 1719 | 2401 | <b>2060</b>   |
| C2orf71      | -0,08642  | -0,590365 | <b>-0,3383925</b> | 1637 | 2447 | <b>2042</b>   |
| CFTR         | -0,574906 | -0,101477 | <b>-0,3381915</b> | 2316 | 2239 | <b>2277,5</b> |
| MAML1        | -0,456354 | -0,219647 | <b>-0,3380005</b> | 1762 | 2246 | <b>2004</b>   |
| UNG          | 0,733107  | -1,40902  | <b>-0,3379565</b> | 1510 | 1869 | <b>1689,5</b> |
| CTNNBIP1     | -0,106969 | -0,567401 | <b>-0,337185</b>  | 1920 | 2505 | <b>2212,5</b> |
| ZNF385D      | -0,630475 | -0,043566 | <b>-0,3370205</b> | 1456 | 1841 | <b>1648,5</b> |
| BOLA1        | -0,266435 | -0,407527 | <b>-0,336981</b>  | 1618 | 1942 | <b>1780</b>   |
| VMA21        | -0,782142 | 0,108362  | <b>-0,33689</b>   | 1705 | 1864 | <b>1784,5</b> |
| LEAP2        | -0,556857 | -0,116062 | <b>-0,3364595</b> | 1850 | 1978 | <b>1914</b>   |
| PSMG2        | -0,336168 | NaN       | <b>-0,336168</b>  | 1940 | NaN  | <b>1940</b>   |
| KIF1C        | 0,670987  | -1,343145 | <b>-0,336079</b>  | 1767 | 1755 | <b>1761</b>   |
| PDCD1        | -0,562585 | -0,109368 | <b>-0,3359765</b> | 1633 | 2154 | <b>1893,5</b> |
| CEBPA        | 0,216736  | -0,888227 | <b>-0,3357455</b> | 1306 | 1803 | <b>1554,5</b> |
| GUCA2B       | -1,381169 | 0,710374  | <b>-0,3353975</b> | 1616 | 1515 | <b>1565,5</b> |
| ANKRD7       | -0,799785 | 0,129444  | <b>-0,3351705</b> | 1646 | 2199 | <b>1922,5</b> |
| MKNK2        | -0,126704 | -0,543595 | <b>-0,3351495</b> | 2157 | 1952 | <b>2054,5</b> |
| RARA         | -0,754005 | 0,083728  | <b>-0,3351385</b> | 1596 | 2354 | <b>1975</b>   |
| TOP2B        | -0,931538 | 0,261418  | <b>-0,33506</b>   | 1647 | 2730 | <b>2188,5</b> |
| CMTM6        | 0,111593  | -0,781047 | <b>-0,334727</b>  | 1225 | 1825 | <b>1525</b>   |
| HSPH1        | -0,382563 | -0,286851 | <b>-0,334707</b>  | 2069 | 2222 | <b>2145,5</b> |
| CTTNBP2NL    | 0,29675   | -0,965245 | <b>-0,3342475</b> | 1329 | 2150 | <b>1739,5</b> |
| OMG          | -0,333742 | NaN       | <b>-0,333742</b>  | 1528 | NaN  | <b>1528</b>   |
| IQGAP1       | -0,136689 | -0,530563 | <b>-0,333626</b>  | 1974 | 1913 | <b>1943,5</b> |
| CD24         | -0,950156 | 0,282994  | <b>-0,333581</b>  | 1771 | 2137 | <b>1954</b>   |

|          |           |           |                   |      |      |               |
|----------|-----------|-----------|-------------------|------|------|---------------|
| FAM110C  | -0,113097 | -0,553852 | <b>-0,3334745</b> | 929  | 1565 | <b>1247</b>   |
| RGL3     | -0,015636 | -0,651244 | <b>-0,33344</b>   | 1398 | 1687 | <b>1542,5</b> |
| PLA2G6   | -0,256427 | -0,410207 | <b>-0,333317</b>  | 1214 | 1513 | <b>1363,5</b> |
| LRRTM2   | -0,731887 | 0,065423  | <b>-0,333232</b>  | 1383 | 1928 | <b>1655,5</b> |
| ATP5F1   | -0,141384 | -0,524894 | <b>-0,333139</b>  | 1628 | 2225 | <b>1926,5</b> |
| C12orf32 | -0,743132 | 0,076955  | <b>-0,3330885</b> | 1904 | 2363 | <b>2133,5</b> |
| NT5C3    | -0,860234 | 0,194835  | <b>-0,3326995</b> | 1805 | 2315 | <b>2060</b>   |
| CLLU1    | 0,04478   | -0,709789 | <b>-0,3325045</b> | 1748 | 1939 | <b>1843,5</b> |
| EVPL     | -0,332422 | NaN       | <b>-0,332422</b>  | 1965 | NaN  | <b>1965</b>   |
| SERP2    | -0,36914  | -0,295677 | <b>-0,3324085</b> | 1798 | 1745 | <b>1771,5</b> |
| MRPL48   | -0,216163 | -0,448232 | <b>-0,3321975</b> | 1695 | 1995 | <b>1845</b>   |
| CACNA1E  | -0,106577 | -0,557536 | <b>-0,3320565</b> | 1759 | 2267 | <b>2013</b>   |
| HCCS     | -0,612257 | -0,05131  | <b>-0,3317835</b> | 1684 | 1804 | <b>1744</b>   |
| MYO18B   | -0,420573 | -0,242834 | <b>-0,3317035</b> | 888  | 878  | <b>883</b>    |
| KIF17    | -1,33924  | 0,675956  | <b>-0,331642</b>  | 1600 | 2003 | <b>1801,5</b> |
| SMAD4    | -0,333177 | -0,329892 | <b>-0,3315345</b> | 1816 | 2257 | <b>2036,5</b> |
| RPL8     | 0,251502  | -0,914489 | <b>-0,3314935</b> | 1017 | 1205 | <b>1111</b>   |
| APOBEC1  | 0,130893  | -0,793616 | <b>-0,3313615</b> | 2217 | 2159 | <b>2188</b>   |
| CHPF2    | -0,719122 | 0,056722  | <b>-0,3312</b>    | 788  | 2361 | <b>1574,5</b> |
| HAUS8    | -0,761092 | 0,098827  | <b>-0,3311325</b> | 2086 | 2575 | <b>2330,5</b> |
| FNDC3B   | -0,21018  | -0,451991 | <b>-0,3310855</b> | 1934 | 2217 | <b>2075,5</b> |
| RNF115   | -0,244125 | -0,417273 | <b>-0,330699</b>  | 887  | 1487 | <b>1187</b>   |
| GLI2     | -0,770374 | 0,109322  | <b>-0,330526</b>  | 1335 | 1607 | <b>1471</b>   |
| CYP7A1   | NaN       | -0,330423 | <b>-0,330423</b>  | NaN  | 2522 | <b>2522</b>   |
| RBP2     | -0,841715 | 0,180981  | <b>-0,330367</b>  | 1622 | 1908 | <b>1765</b>   |
| C16orf86 | -0,160169 | -0,500553 | <b>-0,330361</b>  | 1211 | 1710 | <b>1460,5</b> |
| NUF2     | -2,294541 | 1,63422   | <b>-0,3301605</b> | 647  | 552  | <b>599,5</b>  |
| LGALS1   | -0,892535 | 0,232497  | <b>-0,330019</b>  | 1655 | 2110 | <b>1882,5</b> |
| ASB7     | -0,763865 | 0,103895  | <b>-0,329985</b>  | 1717 | 2987 | <b>2352</b>   |
| SLC6A4   | 0,120803  | -0,780432 | <b>-0,3298145</b> | 1670 | 2376 | <b>2023</b>   |
| RBBP5    | 1,216868  | -1,876136 | <b>-0,329634</b>  | 1637 | 1900 | <b>1768,5</b> |
| PHOX2B   | -0,413605 | -0,24525  | <b>-0,3294275</b> | 1699 | 1691 | <b>1695</b>   |
| CSNK1E   | 0,259244  | -0,917539 | <b>-0,3291475</b> | 1107 | 1187 | <b>1147</b>   |
| SOX10    | 0,001845  | -0,65988  | <b>-0,3290175</b> | 1389 | 1867 | <b>1628</b>   |

|           |           |           |                   |      |      |               |
|-----------|-----------|-----------|-------------------|------|------|---------------|
| C8B       | -0,303731 | -0,354207 | <b>-0,328969</b>  | 1375 | 2215 | <b>1795</b>   |
| OPLAH     | -0,234417 | -0,422976 | <b>-0,3286965</b> | 1102 | 1517 | <b>1309,5</b> |
| ZMYM1     | -1,336851 | 0,680151  | <b>-0,32835</b>   | 1572 | 1617 | <b>1594,5</b> |
| TGFBR1    | 0,345043  | -1,001663 | <b>-0,32831</b>   | 1862 | 1751 | <b>1806,5</b> |
| ANKRD33   | -0,753208 | 0,096755  | <b>-0,3282265</b> | 500  | 1264 | <b>882</b>    |
| CHRNA2    | -0,758745 | 0,102416  | <b>-0,3281645</b> | 2059 | 2742 | <b>2400,5</b> |
| TBXA2R    | -0,328164 | NaN       | <b>-0,328164</b>  | 1172 | NaN  | <b>1172</b>   |
| MCL1      | -0,843284 | 0,187476  | <b>-0,327904</b>  | 1605 | 1864 | <b>1734,5</b> |
| TRA2B     | -0,598463 | -0,057003 | <b>-0,327733</b>  | 1919 | 2283 | <b>2101</b>   |
| TBC1D9B   | -0,066353 | -0,588697 | <b>-0,327525</b>  | 1593 | 2024 | <b>1808,5</b> |
| TJP2      | -0,019521 | -0,635488 | <b>-0,3275045</b> | 2161 | 2272 | <b>2216,5</b> |
| MS4A3     | 0,936947  | -1,591898 | <b>-0,3274755</b> | 1606 | 1729 | <b>1667,5</b> |
| GCHFR     | -0,191126 | -0,463548 | <b>-0,327337</b>  | 1539 | 1984 | <b>1761,5</b> |
| UBP1      | 0,607685  | -1,262327 | <b>-0,327321</b>  | 1893 | 2558 | <b>2225,5</b> |
| ETFB      | -0,09186  | -0,562738 | <b>-0,327299</b>  | 1894 | 2117 | <b>2005,5</b> |
| SRRT      | -0,731512 | 0,076917  | <b>-0,3272975</b> | 1992 | 1963 | <b>1977,5</b> |
| SSX2IP    | -0,723903 | 0,069694  | <b>-0,3271045</b> | 1926 | 1607 | <b>1766,5</b> |
| OR8B8     | -1,304895 | 0,65097   | <b>-0,3269625</b> | 1172 | 2312 | <b>1742</b>   |
| C17orf102 | -0,147555 | -0,505515 | <b>-0,326535</b>  | 1670 | 2216 | <b>1943</b>   |
| SLC45A2   | -0,015887 | -0,637149 | <b>-0,326518</b>  | 2033 | 1799 | <b>1916</b>   |
| TMCO6     | 0,231042  | -0,883632 | <b>-0,326295</b>  | 898  | 1557 | <b>1227,5</b> |
| PRG2      | -0,475246 | -0,177167 | <b>-0,3262065</b> | 1636 | 2377 | <b>2006,5</b> |
| MOBP      | -1,782041 | 1,129713  | <b>-0,326164</b>  | 1915 | 2173 | <b>2044</b>   |
| CHRN2     | -0,160825 | -0,491111 | <b>-0,325968</b>  | 1787 | 2566 | <b>2176,5</b> |
| FAM169B   | -0,434139 | -0,217185 | <b>-0,325662</b>  | 919  | 2046 | <b>1482,5</b> |
| CACNA1I   | -0,194401 | -0,456234 | <b>-0,3253175</b> | 2110 | 2920 | <b>2515</b>   |
| ACR       | -0,859044 | 0,208866  | <b>-0,325089</b>  | 1865 | 2025 | <b>1945</b>   |
| UCHL5     | -0,510432 | -0,139737 | <b>-0,3250845</b> | 2216 | 2427 | <b>2321,5</b> |
| UCHL1     | -0,576643 | -0,073233 | <b>-0,324938</b>  | 1381 | 1787 | <b>1584</b>   |
| LPP       | -0,101    | -0,548607 | <b>-0,3248035</b> | 1368 | 2018 | <b>1693</b>   |
| CIB1      | -0,929615 | 0,280179  | <b>-0,324718</b>  | 1256 | 2103 | <b>1679,5</b> |
| AHCY      | -0,437427 | -0,211828 | <b>-0,3246275</b> | 1749 | 2000 | <b>1874,5</b> |
| OGG1      | -0,06843  | -0,580661 | <b>-0,3245455</b> | 2269 | 2392 | <b>2330,5</b> |
| NMI       | -0,298501 | -0,350334 | <b>-0,3244175</b> | 1162 | 2641 | <b>1901,5</b> |



|           |           |           |                   |      |      |               |
|-----------|-----------|-----------|-------------------|------|------|---------------|
| PELI3     | -0,137838 | -0,509045 | <b>-0,3234415</b> | 1228 | 1554 | <b>1391</b>   |
| C10orf62  | -0,56406  | -0,082784 | <b>-0,323422</b>  | 1563 | 1702 | <b>1632,5</b> |
| C17orf39  | -0,684784 | 0,039038  | <b>-0,322873</b>  | 1399 | 2324 | <b>1861,5</b> |
| UNC5B     | -0,716104 | 0,070427  | <b>-0,3228385</b> | 1509 | 1953 | <b>1731</b>   |
| MTNR1B    | -0,322711 | NaN       | <b>-0,322711</b>  | 1546 | NaN  | <b>1546</b>   |
| C10orf107 | -0,124608 | -0,520693 | <b>-0,3226505</b> | 1725 | 1952 | <b>1838,5</b> |
| ETV7      | NaN       | -0,322233 | <b>-0,322233</b>  | NaN  | 2663 | <b>2663</b>   |
| ARHGAP31  | -0,476359 | -0,167234 | <b>-0,3217965</b> | 1772 | 1709 | <b>1740,5</b> |
| TBPL2     | 0,433338  | -1,07693  | <b>-0,321796</b>  | 1456 | 1563 | <b>1509,5</b> |
| C19orf66  | -0,506994 | -0,135504 | <b>-0,321249</b>  | 1313 | 1759 | <b>1536</b>   |
| HLX       | -0,754716 | 0,112289  | <b>-0,3212135</b> | 1558 | 2365 | <b>1961,5</b> |
| C3orf67   | -0,788118 | 0,146159  | <b>-0,3209795</b> | 1836 | 3271 | <b>2553,5</b> |
| RSPH1     | -0,506328 | -0,135599 | <b>-0,3209635</b> | 1585 | 2124 | <b>1854,5</b> |
| RNF138    | -0,071286 | -0,570602 | <b>-0,320944</b>  | 1860 | 2079 | <b>1969,5</b> |
| ENOPH1    | -0,359877 | -0,281839 | <b>-0,320858</b>  | 1592 | 2747 | <b>2169,5</b> |
| PRB3      | 1,4305    | -2,072118 | <b>-0,320809</b>  | 1652 | 2183 | <b>1917,5</b> |
| SRXN1     | NaN       | -0,320753 | <b>-0,320753</b>  | NaN  | 2633 | <b>2633</b>   |
| FUBP1     | -0,600264 | -0,040956 | <b>-0,32061</b>   | 1287 | 2593 | <b>1940</b>   |
| GPSM1     | 0,311764  | -0,95297  | <b>-0,320603</b>  | 1586 | 2139 | <b>1862,5</b> |
| TKT       | 0,150035  | -0,790781 | <b>-0,320373</b>  | 1258 | 2172 | <b>1715</b>   |
| S100A4    | -0,688934 | 0,048213  | <b>-0,3203605</b> | 1951 | 2076 | <b>2013,5</b> |
| UBR3      | -0,946263 | 0,305694  | <b>-0,3202845</b> | 1576 | 2064 | <b>1820</b>   |
| TNFRSF10B | -0,625713 | -0,014643 | <b>-0,320178</b>  | 1585 | 1938 | <b>1761,5</b> |
| CCDC110   | -0,087443 | -0,552689 | <b>-0,320066</b>  | 1569 | 2384 | <b>1976,5</b> |
| TMPO      | -0,344559 | -0,295572 | <b>-0,3200655</b> | 2240 | 2184 | <b>2212</b>   |
| CSN3      | -0,319899 | NaN       | <b>-0,319899</b>  | 1555 | NaN  | <b>1555</b>   |
| SFMBT2    | 0,131645  | -0,771404 | <b>-0,3198795</b> | 1625 | 1836 | <b>1730,5</b> |
| CORO2A    | 0,232257  | -0,871906 | <b>-0,3198245</b> | 1756 | 1846 | <b>1801</b>   |
| DLG5      | -0,466973 | -0,172615 | <b>-0,319794</b>  | 1344 | 1903 | <b>1623,5</b> |
| PLCL2     | 0,662476  | -1,3018   | <b>-0,319662</b>  | 606  | 1073 | <b>839,5</b>  |
| KRTAP17-1 | -0,665474 | 0,027292  | <b>-0,319091</b>  | 2151 | 2103 | <b>2127</b>   |
| DYDC2     | -0,31888  | NaN       | <b>-0,31888</b>   | 1597 | NaN  | <b>1597</b>   |
| TCTE1     | -0,62082  | -0,016691 | <b>-0,3187555</b> | 1277 | 1807 | <b>1542</b>   |
| BTBD9     | -0,45714  | -0,179997 | <b>-0,3185685</b> | 2123 | 2268 | <b>2195,5</b> |

|          |           |           |                   |      |      |               |
|----------|-----------|-----------|-------------------|------|------|---------------|
| GCA      | -0,225913 | -0,410833 | <b>-0,318373</b>  | 1496 | 2492 | <b>1994</b>   |
| ADH1C    | 0,13786   | -0,774301 | <b>-0,3182205</b> | 1210 | 1852 | <b>1531</b>   |
| UBASH3A  | -0,051276 | -0,58497  | <b>-0,318123</b>  | 1685 | 2447 | <b>2066</b>   |
| RAD54L2  | -0,175328 | -0,460833 | <b>-0,3180805</b> | 1041 | 1828 | <b>1434,5</b> |
| SLC18A3  | -0,060146 | -0,575731 | <b>-0,3179385</b> | 1551 | 1977 | <b>1764</b>   |
| KRTAP3-2 | -0,771961 | 0,137459  | <b>-0,317251</b>  | 1611 | 2149 | <b>1880</b>   |
| USP5     | -0,728376 | 0,095077  | <b>-0,3166495</b> | 1660 | 1876 | <b>1768</b>   |
| TXN      | -0,090219 | -0,542535 | <b>-0,316377</b>  | 1790 | 1975 | <b>1882,5</b> |
| ZNF146   | -0,937193 | 0,30444   | <b>-0,3163765</b> | 1246 | 1951 | <b>1598,5</b> |
| FBXO9    | -0,570533 | -0,062105 | <b>-0,316319</b>  | 1859 | 2884 | <b>2371,5</b> |
| CFB      | 0,389941  | -1,022534 | <b>-0,3162965</b> | 1376 | 2082 | <b>1729</b>   |
| PBOV1    | -0,316256 | NaN       | <b>-0,316256</b>  | 1277 | NaN  | <b>1277</b>   |
| RASGEF1C | -0,109024 | -0,523155 | <b>-0,3160895</b> | 1183 | 1810 | <b>1496,5</b> |
| VEZF1    | 0,123225  | -0,754493 | <b>-0,315634</b>  | 1363 | 1579 | <b>1471</b>   |
| IL23R    | 0,045055  | -0,676116 | <b>-0,3155305</b> | 1881 | 2842 | <b>2361,5</b> |
| SMEK2    | -0,315476 | NaN       | <b>-0,315476</b>  | 1619 | NaN  | <b>1619</b>   |
| KDM4C    | -0,315034 | NaN       | <b>-0,315034</b>  | 1443 | NaN  | <b>1443</b>   |
| DIP2B    | -0,314958 | NaN       | <b>-0,314958</b>  | 1427 | NaN  | <b>1427</b>   |
| KIAA1033 | -0,334833 | -0,294832 | <b>-0,3148325</b> | 1898 | 1632 | <b>1765</b>   |
| SGSM1    | -0,622481 | -0,0071   | <b>-0,3147905</b> | 1568 | 1544 | <b>1556</b>   |
| PSMC2    | 0,464637  | -1,094131 | <b>-0,314747</b>  | 686  | 789  | <b>737,5</b>  |
| TBCCD1   | -0,314656 | NaN       | <b>-0,314656</b>  | 1718 | NaN  | <b>1718</b>   |
| C2orf40  | -0,314642 | NaN       | <b>-0,314642</b>  | 2374 | NaN  | <b>2374</b>   |
| RBM46    | -0,314465 | NaN       | <b>-0,314465</b>  | 1768 | NaN  | <b>1768</b>   |
| AFAP1L2  | 0,108116  | -0,736709 | <b>-0,3142965</b> | 1448 | 1385 | <b>1416,5</b> |
| ALS2CL   | -0,314295 | NaN       | <b>-0,314295</b>  | 1226 | NaN  | <b>1226</b>   |
| STX1A    | 0,170987  | -0,799194 | <b>-0,3141035</b> | 1674 | 1743 | <b>1708,5</b> |
| RAB32    | -0,437672 | -0,189362 | <b>-0,313517</b>  | 1559 | 2241 | <b>1900</b>   |
| C7orf29  | -0,313489 | NaN       | <b>-0,313489</b>  | 1687 | NaN  | <b>1687</b>   |
| SYCP2    | -0,313184 | NaN       | <b>-0,313184</b>  | 1762 | NaN  | <b>1762</b>   |
| FASLG    | -0,130525 | -0,495502 | <b>-0,3130135</b> | 1603 | 2373 | <b>1988</b>   |
| IMPA1    | -0,352443 | -0,27322  | <b>-0,3128315</b> | 2010 | 2424 | <b>2217</b>   |
| PPP2R5B  | -0,644851 | 0,019294  | <b>-0,3127785</b> | 1738 | 2181 | <b>1959,5</b> |
| NRG3     | -0,598646 | -0,026153 | <b>-0,3123995</b> | 1992 | 2965 | <b>2478,5</b> |

|          |           |           |                   |      |      |               |
|----------|-----------|-----------|-------------------|------|------|---------------|
| LRCH2    | -0,357828 | -0,266859 | <b>-0,3123435</b> | 1759 | 2727 | <b>2243</b>   |
| HPX      | 0,357501  | -0,981572 | <b>-0,3120355</b> | 1635 | 1924 | <b>1779,5</b> |
| SLIRP    | -0,609243 | -0,014682 | <b>-0,3119625</b> | 1519 | 1489 | <b>1504</b>   |
| IL17B    | -0,173234 | -0,450111 | <b>-0,3116725</b> | 1761 | 1586 | <b>1673,5</b> |
| OR2B11   | -1,61382  | 0,99088   | <b>-0,31147</b>   | 977  | 1387 | <b>1182</b>   |
| VAPB     | -0,158628 | -0,464156 | <b>-0,311392</b>  | 1899 | 2433 | <b>2166</b>   |
| GLP1R    | -0,311369 | NaN       | <b>-0,311369</b>  | 1709 | NaN  | <b>1709</b>   |
| SCML2    | NaN       | -0,311146 | <b>-0,311146</b>  | NaN  | 2919 | <b>2919</b>   |
| GRAMD4   | -0,310794 | NaN       | <b>-0,310794</b>  | 1847 | NaN  | <b>1847</b>   |
| FLOT1    | -0,341819 | -0,279647 | <b>-0,310733</b>  | 2019 | 1618 | <b>1818,5</b> |
| PPP3CB   | 0,194057  | -0,815272 | <b>-0,3106075</b> | 1019 | 2376 | <b>1697,5</b> |
| HKDC1    | -1,085539 | 0,464486  | <b>-0,3105265</b> | 1625 | 2253 | <b>1939</b>   |
| NANOG    | -0,392614 | -0,228116 | <b>-0,310365</b>  | 2016 | 2091 | <b>2053,5</b> |
| SPHK2    | 0,005054  | -0,625351 | <b>-0,3101485</b> | 1393 | 2048 | <b>1720,5</b> |
| SPINK9   | 0,054666  | -0,67477  | <b>-0,310052</b>  | 1679 | 1949 | <b>1814</b>   |
| NUP210   | 0,260618  | -0,879962 | <b>-0,309672</b>  | 1657 | 1646 | <b>1651,5</b> |
| TEX9     | -0,15491  | -0,464418 | <b>-0,309664</b>  | 1546 | 2023 | <b>1784,5</b> |
| ABCC12   | -0,202175 | -0,416869 | <b>-0,309522</b>  | 1398 | 1697 | <b>1547,5</b> |
| BCL9L    | -0,518671 | -0,100156 | <b>-0,3094135</b> | 1072 | 1308 | <b>1190</b>   |
| C3orf22  | -0,807203 | 0,188494  | <b>-0,3093545</b> | 1871 | 2498 | <b>2184,5</b> |
| MARVELD3 | -0,499107 | -0,119511 | <b>-0,309309</b>  | 1654 | 2036 | <b>1845</b>   |
| SHC1     | 0,417822  | -1,036321 | <b>-0,3092495</b> | 1737 | 1941 | <b>1839</b>   |
| WSCD2    | -0,215009 | -0,403247 | <b>-0,309128</b>  | 1171 | 1709 | <b>1440</b>   |
| EMX2     | 0,306226  | -0,924303 | <b>-0,3090385</b> | 1605 | 2602 | <b>2103,5</b> |
| PTPLA    | 0,257806  | -0,875603 | <b>-0,3088985</b> | 2023 | 2138 | <b>2080,5</b> |
| PRMT10   | -0,100489 | -0,516978 | <b>-0,3087335</b> | 1869 | 2180 | <b>2024,5</b> |
| ATG5     | NaN       | -0,308638 | <b>-0,308638</b>  | NaN  | 2570 | <b>2570</b>   |
| CYP1A2   | 0,168995  | -0,785189 | <b>-0,308097</b>  | 1229 | 2100 | <b>1664,5</b> |
| SLC17A2  | -0,997009 | 0,380826  | <b>-0,3080915</b> | 1735 | 1724 | <b>1729,5</b> |
| TRIM8    | -0,020709 | -0,594817 | <b>-0,307763</b>  | 1439 | 3010 | <b>2224,5</b> |
| CNPY4    | -0,221907 | -0,393476 | <b>-0,3076915</b> | 1784 | 1986 | <b>1885</b>   |
| LBR      | -0,561566 | -0,053696 | <b>-0,307631</b>  | 1465 | 2139 | <b>1802</b>   |
| FRK      | -0,299143 | -0,315683 | <b>-0,307413</b>  | 1392 | 2196 | <b>1794</b>   |
| FGFR2    | -0,598593 | -0,015179 | <b>-0,306886</b>  | 1715 | 1657 | <b>1686</b>   |

|         |           |           |                   |      |      |               |
|---------|-----------|-----------|-------------------|------|------|---------------|
| POU3F4  | -0,10903  | -0,504297 | <b>-0,3066635</b> | 884  | 1210 | <b>1047</b>   |
| BCAR3   | -0,306553 | NaN       | <b>-0,306553</b>  | 1617 | NaN  | <b>1617</b>   |
| MLLT10  | -0,667164 | 0,054361  | <b>-0,3064015</b> | 1821 | 2281 | <b>2051</b>   |
| SAMD15  | -0,306266 | NaN       | <b>-0,306266</b>  | 1754 | NaN  | <b>1754</b>   |
| TAPT1   | 0,449797  | -1,062293 | <b>-0,306248</b>  | 1313 | 1766 | <b>1539,5</b> |
| SPRR2G  | -0,253443 | -0,358862 | <b>-0,3061525</b> | 1026 | 1882 | <b>1454</b>   |
| OR2AG1  | -0,921159 | 0,308874  | <b>-0,3061425</b> | 864  | 1799 | <b>1331,5</b> |
| C5orf43 | -0,46052  | -0,151605 | <b>-0,3060625</b> | 1829 | 1904 | <b>1866,5</b> |
| OR10A3  | -1,060195 | 0,448724  | <b>-0,3057355</b> | 1946 | 1108 | <b>1527</b>   |
| P2RX1   | 0,080502  | -0,69129  | <b>-0,305394</b>  | 1539 | 1712 | <b>1625,5</b> |
| LRRRC27 | -0,3053   | NaN       | <b>-0,3053</b>    | 1381 | NaN  | <b>1381</b>   |
| EPHB3   | -0,313823 | -0,296688 | <b>-0,3052555</b> | 1617 | 1971 | <b>1794</b>   |
| CACNA1B | 0,088099  | -0,698583 | <b>-0,305242</b>  | 1814 | 2555 | <b>2184,5</b> |
| FMN2    | -0,305167 | NaN       | <b>-0,305167</b>  | 1270 | NaN  | <b>1270</b>   |
| VPS45   | -0,916814 | 0,306856  | <b>-0,304979</b>  | 1754 | 2123 | <b>1938,5</b> |
| PTP4A2  | -0,482321 | -0,127368 | <b>-0,3048445</b> | 1971 | 2514 | <b>2242,5</b> |
| TSR1    | -0,418459 | -0,190786 | <b>-0,3046225</b> | 1526 | 1727 | <b>1626,5</b> |
| WDR70   | -0,304574 | NaN       | <b>-0,304574</b>  | 1222 | NaN  | <b>1222</b>   |
| CTSC    | 0,123248  | -0,732346 | <b>-0,304549</b>  | 1308 | 2258 | <b>1783</b>   |
| SLC5A2  | -0,098115 | -0,51064  | <b>-0,3043775</b> | 1560 | 1941 | <b>1750,5</b> |
| OR51I2  | -0,304373 | NaN       | <b>-0,304373</b>  | 1062 | NaN  | <b>1062</b>   |
| CAPSL   | -0,665373 | 0,056687  | <b>-0,304343</b>  | 2486 | 2275 | <b>2380,5</b> |
| ZAR1    | 0,249757  | -0,858166 | <b>-0,3042045</b> | 1696 | 2333 | <b>2014,5</b> |
| ZWINT   | -0,304181 | NaN       | <b>-0,304181</b>  | 1671 | NaN  | <b>1671</b>   |
| AURKC   | -0,610021 | 0,00243   | <b>-0,3037955</b> | 1812 | 2185 | <b>1998,5</b> |
| NLRP13  | -0,35055  | -0,256911 | <b>-0,3037305</b> | 1508 | 2033 | <b>1770,5</b> |
| TIGD1   | -0,303546 | NaN       | <b>-0,303546</b>  | 1049 | NaN  | <b>1049</b>   |
| TM4SF18 | -0,565737 | -0,041069 | <b>-0,303403</b>  | 1819 | 1761 | <b>1790</b>   |
| ASTE1   | -0,275674 | -0,331078 | <b>-0,303376</b>  | 1993 | 2073 | <b>2033</b>   |
| KCTD16  | -0,603815 | -0,002932 | <b>-0,3033735</b> | 2132 | 2854 | <b>2493</b>   |
| OR4F15  | -0,723825 | 0,117461  | <b>-0,303182</b>  | 1587 | 1961 | <b>1774</b>   |
| MFS2A   | -0,152013 | -0,454042 | <b>-0,3030275</b> | 1365 | 1960 | <b>1662,5</b> |
| WDR86   | -0,180725 | -0,424841 | <b>-0,302783</b>  | 1347 | 1915 | <b>1631</b>   |
| METRN   | -0,302755 | NaN       | <b>-0,302755</b>  | 1034 | NaN  | <b>1034</b>   |

|          |           |           |                   |      |      |               |
|----------|-----------|-----------|-------------------|------|------|---------------|
| SENP8    | -0,027945 | -0,576877 | <b>-0,302411</b>  | 1213 | 1980 | <b>1596,5</b> |
| GLRX2    | 0,020663  | -0,625373 | <b>-0,302355</b>  | 1073 | 1713 | <b>1393</b>   |
| SEL1L3   | -0,149732 | -0,45482  | <b>-0,302276</b>  | 1412 | 1701 | <b>1556,5</b> |
| ATAD3C   | -0,439588 | -0,1649   | <b>-0,302244</b>  | 1948 | 2031 | <b>1989,5</b> |
| CLDN2    | -0,285677 | -0,318797 | <b>-0,302237</b>  | 1521 | 2407 | <b>1964</b>   |
| GPR4     | -0,302166 | NaN       | <b>-0,302166</b>  | 1489 | NaN  | <b>1489</b>   |
| EIF4EBP2 | -0,357315 | -0,246862 | <b>-0,3020885</b> | 1627 | 2231 | <b>1929</b>   |
| C11orf49 | 0,27681   | -0,880945 | <b>-0,3020675</b> | 1602 | 2133 | <b>1867,5</b> |
| DUSP12   | 0,838029  | -1,442086 | <b>-0,3020285</b> | 1799 | 2459 | <b>2129</b>   |
| ZDHHC15  | -0,335716 | -0,268334 | <b>-0,302025</b>  | 1855 | 2208 | <b>2031,5</b> |
| NKAIN4   | -0,769142 | 0,165418  | <b>-0,301862</b>  | 1162 | 1762 | <b>1462</b>   |
| NNAT     | -0,81505  | 0,211778  | <b>-0,301636</b>  | 1340 | 1296 | <b>1318</b>   |
| DNAJA2   | -0,295002 | -0,308187 | <b>-0,3015945</b> | 1654 | 2850 | <b>2252</b>   |
| GNPAT    | -0,171466 | -0,431419 | <b>-0,3014425</b> | 1522 | 2043 | <b>1782,5</b> |
| FUT5     | -0,106806 | -0,496062 | <b>-0,301434</b>  | 1523 | 2400 | <b>1961,5</b> |
| PHF15    | -0,302108 | -0,299899 | <b>-0,3010035</b> | 1392 | 2243 | <b>1817,5</b> |
| RHBDD1   | -0,30097  | NaN       | <b>-0,30097</b>   | 1594 | NaN  | <b>1594</b>   |
| RPL37    | -0,386139 | -0,215325 | <b>-0,300732</b>  | 1887 | 2548 | <b>2217,5</b> |
| TIAL1    | -0,012745 | -0,588648 | <b>-0,3006965</b> | 2068 | 2838 | <b>2453</b>   |
| KCNN1    | -0,16962  | -0,431751 | <b>-0,3006855</b> | 1214 | 1868 | <b>1541</b>   |
| PLA2G15  | -0,119653 | -0,481559 | <b>-0,300606</b>  | 1216 | 1683 | <b>1449,5</b> |
| ALPI     | -0,123939 | -0,477004 | <b>-0,3004715</b> | 1792 | 2501 | <b>2146,5</b> |
| STX3     | -0,791233 | 0,190875  | <b>-0,300179</b>  | 1564 | 2337 | <b>1950,5</b> |
| SHMT1    | -0,383856 | -0,216129 | <b>-0,2999925</b> | 1204 | 1592 | <b>1398</b>   |
| BCL7A    | -0,973014 | 0,373226  | <b>-0,299894</b>  | 1779 | 2309 | <b>2044</b>   |
| LY86     | 0,424791  | -1,024397 | <b>-0,299803</b>  | 1538 | 2047 | <b>1792,5</b> |
| RFX1     | 0,278462  | -0,877655 | <b>-0,2995965</b> | 1375 | 1836 | <b>1605,5</b> |
| ZNF133   | -0,299318 | NaN       | <b>-0,299318</b>  | 1566 | NaN  | <b>1566</b>   |
| FKBP14   | -0,415077 | -0,183374 | <b>-0,2992255</b> | 1564 | 2468 | <b>2016</b>   |
| HSPB6    | -0,982264 | 0,384403  | <b>-0,2989305</b> | 1762 | 1720 | <b>1741</b>   |
| ONECUT3  | -0,298697 | NaN       | <b>-0,298697</b>  | 1639 | NaN  | <b>1639</b>   |
| GAS2     | -0,534883 | -0,062372 | <b>-0,2986275</b> | 1415 | 2463 | <b>1939</b>   |
| WNT1     | -0,098487 | -0,498304 | <b>-0,2983955</b> | 1981 | 1702 | <b>1841,5</b> |
| SNX3     | -0,415827 | -0,180674 | <b>-0,2982505</b> | 1392 | 1654 | <b>1523</b>   |

|          |           |           |                   |      |      |               |
|----------|-----------|-----------|-------------------|------|------|---------------|
| WDR13    | -0,25823  | -0,338201 | <b>-0,2982155</b> | 1199 | 2061 | <b>1630</b>   |
| LGR6     | -0,298214 | NaN       | <b>-0,298214</b>  | 1629 | NaN  | <b>1629</b>   |
| PAPD4    | -0,627933 | 0,031558  | <b>-0,2981875</b> | 1126 | 1809 | <b>1467,5</b> |
| KIAA1958 | -0,298045 | NaN       | <b>-0,298045</b>  | 1828 | NaN  | <b>1828</b>   |
| PLEKHN1  | -0,297668 | NaN       | <b>-0,297668</b>  | 921  | NaN  | <b>921</b>    |
| EFHA2    | -0,340255 | -0,254904 | <b>-0,2975795</b> | 1802 | 2352 | <b>2077</b>   |
| PLA2G7   | -0,040146 | -0,554848 | <b>-0,297497</b>  | 1701 | 1791 | <b>1746</b>   |
| MFGE8    | -0,672161 | 0,077601  | <b>-0,29728</b>   | 1136 | 1569 | <b>1352,5</b> |
| ERCC2    | 0,51355   | -1,107634 | <b>-0,297042</b>  | 2103 | 3115 | <b>2609</b>   |
| MVK      | -0,949312 | 0,355261  | <b>-0,2970255</b> | 1776 | 1822 | <b>1799</b>   |
| WDR16    | 0,195024  | -0,789039 | <b>-0,2970075</b> | 1452 | 2326 | <b>1889</b>   |
| CARD14   | -0,149127 | -0,444662 | <b>-0,2968945</b> | 1441 | 1888 | <b>1664,5</b> |
| GJB1     | 0,838427  | -1,431176 | <b>-0,2963745</b> | 522  | 1698 | <b>1110</b>   |
| ZNF662   | -0,329477 | -0,262715 | <b>-0,296096</b>  | 1860 | 3032 | <b>2446</b>   |
| IGF2BP2  | -0,122756 | -0,469358 | <b>-0,296057</b>  | 1806 | 1780 | <b>1793</b>   |
| HNF4A    | -0,18099  | -0,411002 | <b>-0,295996</b>  | 1566 | 1611 | <b>1588,5</b> |
| SUN5     | -0,246883 | -0,344636 | <b>-0,2957595</b> | 1562 | 1370 | <b>1466</b>   |
| OR51A7   | -0,405315 | -0,185889 | <b>-0,295602</b>  | 1596 | 2081 | <b>1838,5</b> |
| ZNF419   | -0,295491 | NaN       | <b>-0,295491</b>  | 2103 | NaN  | <b>2103</b>   |
| PALM2    | -0,811339 | 0,220627  | <b>-0,295356</b>  | 1740 | 2130 | <b>1935</b>   |
| MFAP4    | -0,214281 | -0,376369 | <b>-0,295325</b>  | 1549 | 1770 | <b>1659,5</b> |
| CACNB1   | -1,075313 | 0,484728  | <b>-0,2952925</b> | 1855 | 1965 | <b>1910</b>   |
| CECR1    | 0,338681  | -0,92916  | <b>-0,2952395</b> | 1041 | 2252 | <b>1646,5</b> |
| ANXA4    | -0,295141 | NaN       | <b>-0,295141</b>  | 1571 | NaN  | <b>1571</b>   |
| OPALIN   | -0,295076 | NaN       | <b>-0,295076</b>  | 1809 | NaN  | <b>1809</b>   |
| POLR1D   | -0,19491  | -0,39466  | <b>-0,294785</b>  | 1472 | 1987 | <b>1729,5</b> |
| NIPBL    | -0,455043 | -0,134426 | <b>-0,2947345</b> | 1589 | 1836 | <b>1712,5</b> |
| SLC15A1  | 0,051055  | -0,640298 | <b>-0,2946215</b> | 1984 | 2761 | <b>2372,5</b> |
| HOXC5    | -1,451424 | 0,862207  | <b>-0,2946085</b> | 1440 | 2024 | <b>1732</b>   |
| LTBP2    | -0,058023 | -0,53113  | <b>-0,2945765</b> | 936  | 1548 | <b>1242</b>   |
| SDC1     | 0,074036  | -0,662505 | <b>-0,2942345</b> | 1384 | 2269 | <b>1826,5</b> |
| PHLDB2   | -0,502617 | -0,085835 | <b>-0,294226</b>  | 1500 | 2021 | <b>1760,5</b> |
| MYH6     | 0,085622  | -0,673575 | <b>-0,2939765</b> | 1167 | 1465 | <b>1316</b>   |
| MBP      | 0,32206   | -0,909965 | <b>-0,2939525</b> | 1442 | 2084 | <b>1763</b>   |

|          |           |           |                   |      |      |               |
|----------|-----------|-----------|-------------------|------|------|---------------|
| UTP15    | -0,394715 | -0,192939 | <b>-0,293827</b>  | 1727 | 1545 | <b>1636</b>   |
| C19orf21 | -0,447458 | -0,139519 | <b>-0,2934885</b> | 1540 | 2060 | <b>1800</b>   |
| DIO1     | -0,528547 | -0,058014 | <b>-0,2932805</b> | 1699 | 1875 | <b>1787</b>   |
| CPO      | 0,214172  | -0,800522 | <b>-0,293175</b>  | 1529 | 1568 | <b>1548,5</b> |
| DCD      | 0,394742  | -0,981035 | <b>-0,2931465</b> | 1232 | 1284 | <b>1258</b>   |
| GPR135   | -0,293034 | NaN       | <b>-0,293034</b>  | 1725 | NaN  | <b>1725</b>   |
| OR51F1   | -0,29273  | NaN       | <b>-0,29273</b>   | 1847 | NaN  | <b>1847</b>   |
| DRD4     | -0,292662 | NaN       | <b>-0,292662</b>  | 1288 | NaN  | <b>1288</b>   |
| TMEM215  | -0,29257  | NaN       | <b>-0,29257</b>   | 1625 | NaN  | <b>1625</b>   |
| BEND5    | -0,202929 | -0,382189 | <b>-0,292559</b>  | 2059 | 1888 | <b>1973,5</b> |
| NIF3L1   | -0,157722 | -0,427113 | <b>-0,2924175</b> | 1475 | 2653 | <b>2064</b>   |
| IL28RA   | 0,814137  | -1,398408 | <b>-0,2921355</b> | 1178 | 1632 | <b>1405</b>   |
| PKM2     | -0,604578 | 0,020436  | <b>-0,292071</b>  | 2035 | 1733 | <b>1884</b>   |
| OR52B6   | -0,339671 | -0,244277 | <b>-0,291974</b>  | 1747 | 2063 | <b>1905</b>   |
| KLK14    | -0,595238 | 0,011474  | <b>-0,291882</b>  | 1270 | 1695 | <b>1482,5</b> |
| ZUFSP    | -0,422279 | -0,161418 | <b>-0,2918485</b> | 1506 | 2492 | <b>1999</b>   |
| KIF21B   | 0,00239   | -0,585564 | <b>-0,291587</b>  | 1726 | 1957 | <b>1841,5</b> |
| SLC6A7   | 0,511324  | -1,094321 | <b>-0,2914985</b> | 1589 | 2062 | <b>1825,5</b> |
| OTUD4    | -0,718414 | 0,135436  | <b>-0,291489</b>  | 2033 | 2489 | <b>2261</b>   |
| TACC1    | -0,291405 | NaN       | <b>-0,291405</b>  | 2133 | NaN  | <b>2133</b>   |
| RPP38    | -0,441707 | -0,140051 | <b>-0,290879</b>  | 1876 | 2253 | <b>2064,5</b> |
| MPP7     | 0,163544  | -0,744736 | <b>-0,290596</b>  | 1851 | 2139 | <b>1995</b>   |
| DAXX     | -0,146987 | -0,433861 | <b>-0,290424</b>  | 1512 | 2283 | <b>1897,5</b> |
| METTL23  | -0,930752 | 0,350224  | <b>-0,290264</b>  | 1352 | 1836 | <b>1594</b>   |
| NAT14    | -0,290209 | NaN       | <b>-0,290209</b>  | 1550 | NaN  | <b>1550</b>   |
| JARID2   | -0,060229 | -0,520023 | <b>-0,290126</b>  | 1357 | 2198 | <b>1777,5</b> |
| SLITRK4  | 0,084432  | -0,664588 | <b>-0,290078</b>  | 1367 | 1827 | <b>1597</b>   |
| SSBP4    | -0,290019 | NaN       | <b>-0,290019</b>  | 1614 | NaN  | <b>1614</b>   |
| GPSM3    | -0,29     | NaN       | <b>-0,29</b>      | 1303 | NaN  | <b>1303</b>   |
| PRR23B   | 0,251509  | -0,831101 | <b>-0,289796</b>  | 1077 | 1608 | <b>1342,5</b> |
| CENPJ    | 0,060463  | -0,639234 | <b>-0,2893855</b> | 1520 | 2087 | <b>1803,5</b> |
| MAGEB6   | -0,070713 | -0,507998 | <b>-0,2893555</b> | 1462 | 1985 | <b>1723,5</b> |
| FUS      | -0,647133 | 0,068474  | <b>-0,2893295</b> | 1715 | 2623 | <b>2169</b>   |
| SSR3     | 0,064542  | -0,642775 | <b>-0,2891165</b> | 1746 | 2027 | <b>1886,5</b> |

|           |           |           |                   |      |      |               |
|-----------|-----------|-----------|-------------------|------|------|---------------|
| DNTTIP1   | -0,318224 | -0,259641 | <b>-0,2889325</b> | 1399 | 1672 | <b>1535,5</b> |
| BEGAIN    | -0,043455 | -0,533352 | <b>-0,2884035</b> | 1505 | 2198 | <b>1851,5</b> |
| SYT2      | -0,156657 | -0,418815 | <b>-0,287736</b>  | 1827 | 2214 | <b>2020,5</b> |
| ELF3      | 0,22327   | -0,798629 | <b>-0,2876795</b> | 772  | 1410 | <b>1091</b>   |
| ZBTB4     | -0,080784 | -0,494289 | <b>-0,2875365</b> | 1902 | 2218 | <b>2060</b>   |
| SCN4B     | -0,696796 | 0,123264  | <b>-0,286766</b>  | 2316 | 2876 | <b>2596</b>   |
| PSMB2     | -0,201265 | -0,372263 | <b>-0,286764</b>  | 1356 | 1672 | <b>1514</b>   |
| GSX1      | -0,320308 | -0,253153 | <b>-0,2867305</b> | 1367 | 1683 | <b>1525</b>   |
| GZMB      | 0,074265  | -0,647488 | <b>-0,2866115</b> | 1647 | 2317 | <b>1982</b>   |
| OR5T2     | -0,198344 | -0,374782 | <b>-0,286563</b>  | 1970 | 2142 | <b>2056</b>   |
| METTL14   | -1,095036 | 0,522159  | <b>-0,2864385</b> | 1787 | 2436 | <b>2111,5</b> |
| FAM126A   | 0,054069  | -0,62663  | <b>-0,2862805</b> | 1736 | 1949 | <b>1842,5</b> |
| C15orf55  | -0,376056 | -0,196119 | <b>-0,2860875</b> | 1228 | 1789 | <b>1508,5</b> |
| VAC14     | -0,285901 | NaN       | <b>-0,285901</b>  | 1666 | NaN  | <b>1666</b>   |
| NOD1      | -0,038212 | -0,533518 | <b>-0,285865</b>  | 1596 | 2371 | <b>1983,5</b> |
| SLC25A30  | 0,518385  | -1,090106 | <b>-0,2858605</b> | 1630 | 1686 | <b>1658</b>   |
| CCL1      | -0,285854 | NaN       | <b>-0,285854</b>  | 2225 | NaN  | <b>2225</b>   |
| KLHL31    | -0,285615 | NaN       | <b>-0,285615</b>  | 1938 | NaN  | <b>1938</b>   |
| ACSL5     | -0,503587 | -0,067386 | <b>-0,2854865</b> | 1695 | 2331 | <b>2013</b>   |
| IFNAR1    | -0,842501 | 0,271718  | <b>-0,2853915</b> | 1345 | 1795 | <b>1570</b>   |
| NR1I2     | -0,61498  | 0,044949  | <b>-0,2850155</b> | 1886 | 2103 | <b>1994,5</b> |
| FOLR3     | -0,502963 | -0,066982 | <b>-0,2849725</b> | 1200 | 2210 | <b>1705</b>   |
| SSSCA1    | -0,193114 | -0,376593 | <b>-0,2848535</b> | 1869 | 2732 | <b>2300,5</b> |
| RAET1E    | -0,769509 | 0,200064  | <b>-0,2847225</b> | 1998 | 2372 | <b>2185</b>   |
| STEAP2    | -0,457254 | -0,111962 | <b>-0,284608</b>  | 1548 | 1884 | <b>1716</b>   |
| POFUT1    | -0,489336 | -0,079634 | <b>-0,284485</b>  | 854  | 1496 | <b>1175</b>   |
| FAM193B   | 0,184126  | -0,753059 | <b>-0,2844665</b> | 1496 | 2159 | <b>1827,5</b> |
| CTNNA1    | -0,783205 | 0,214402  | <b>-0,2844015</b> | 1696 | 2443 | <b>2069,5</b> |
| PGF       | 0,02778   | -0,596427 | <b>-0,2843235</b> | 1389 | 1432 | <b>1410,5</b> |
| SECISBP2L | -0,116963 | -0,451137 | <b>-0,28405</b>   | 1395 | 1661 | <b>1528</b>   |
| ACTN1     | 0,81616   | -1,38426  | <b>-0,28405</b>   | 1428 | 1690 | <b>1559</b>   |
| DIRAS1    | -0,010203 | -0,557626 | <b>-0,2839145</b> | 534  | 942  | <b>738</b>    |
| CD38      | -0,113155 | -0,454642 | <b>-0,2838985</b> | 1546 | 1680 | <b>1613</b>   |
| STAC      | -0,406176 | -0,16161  | <b>-0,283893</b>  | 1176 | 1734 | <b>1455</b>   |



|          |           |           |                   |      |      |               |
|----------|-----------|-----------|-------------------|------|------|---------------|
| PBRM1    | -0,564115 | -0,003667 | <b>-0,283891</b>  | 1662 | 2598 | <b>2130</b>   |
| LHX4     | NaN       | -0,283841 | <b>-0,283841</b>  | NaN  | 1748 | <b>1748</b>   |
| MDN1     | -0,162399 | -0,404415 | <b>-0,283407</b>  | 1594 | 2132 | <b>1863</b>   |
| SECTM1   | -0,283385 | NaN       | <b>-0,283385</b>  | 1720 | NaN  | <b>1720</b>   |
| TECTA    | -0,2363   | -0,330321 | <b>-0,2833105</b> | 1266 | 2110 | <b>1688</b>   |
| LTF      | -0,003777 | -0,562419 | <b>-0,283098</b>  | 1045 | 2076 | <b>1560,5</b> |
| HAMP     | -0,706691 | 0,140692  | <b>-0,2829995</b> | 1726 | 2243 | <b>1984,5</b> |
| RETSAT   | -0,282831 | NaN       | <b>-0,282831</b>  | 1619 | NaN  | <b>1619</b>   |
| NAP1L1   | -0,282722 | NaN       | <b>-0,282722</b>  | 1697 | NaN  | <b>1697</b>   |
| PCDH18   | -0,475074 | -0,089977 | <b>-0,2825255</b> | 1815 | 2217 | <b>2016</b>   |
| CPOX     | -1,092612 | 0,527576  | <b>-0,282518</b>  | 1386 | 2261 | <b>1823,5</b> |
| SERPINB7 | 0,184965  | -0,749978 | <b>-0,2825065</b> | 1301 | 1655 | <b>1478</b>   |
| RPS25    | -0,026574 | -0,538032 | <b>-0,282303</b>  | 1633 | 1390 | <b>1511,5</b> |
| KRT38    | -0,217782 | -0,346815 | <b>-0,2822985</b> | 1540 | 1716 | <b>1628</b>   |
| TGM3     | -0,294872 | -0,269632 | <b>-0,282252</b>  | 1845 | 1508 | <b>1676,5</b> |
| AK8      | -0,853955 | 0,289479  | <b>-0,282238</b>  | 2156 | 1626 | <b>1891</b>   |
| CAGE1    | -0,259693 | -0,304668 | <b>-0,2821805</b> | 1838 | 2856 | <b>2347</b>   |
| IGFL3    | -1,163808 | 0,59964   | <b>-0,282084</b>  | 1939 | 2132 | <b>2035,5</b> |
| LRP1B    | -0,670594 | 0,106766  | <b>-0,281914</b>  | 1442 | 2396 | <b>1919</b>   |
| XPNPEP1  | 0,793185  | -1,356748 | <b>-0,2817815</b> | 1049 | 2219 | <b>1634</b>   |
| RBFA     | 0,462418  | -1,025803 | <b>-0,2816925</b> | 1037 | 1694 | <b>1365,5</b> |
| AADAC    | -0,003828 | -0,559193 | <b>-0,2815105</b> | 1260 | 2357 | <b>1808,5</b> |
| OCEL1    | -0,38784  | -0,175059 | <b>-0,2814495</b> | 1683 | 2321 | <b>2002</b>   |
| KCNMB4   | 0,322312  | -0,88488  | <b>-0,281284</b>  | 1590 | 2809 | <b>2199,5</b> |
| ESYT2    | -0,121795 | -0,440663 | <b>-0,281229</b>  | 1736 | 1936 | <b>1836</b>   |
| NEUROG2  | -0,215072 | -0,347255 | <b>-0,2811635</b> | 1615 | 1770 | <b>1692,5</b> |
| BAZ1B    | -0,444634 | -0,117456 | <b>-0,281045</b>  | 1766 | 2362 | <b>2064</b>   |
| MYCN     | -0,410225 | -0,151646 | <b>-0,2809355</b> | 1472 | 1846 | <b>1659</b>   |
| ENTHD1   | -0,280764 | NaN       | <b>-0,280764</b>  | 2079 | NaN  | <b>2079</b>   |
| CCDC146  | -0,280217 | NaN       | <b>-0,280217</b>  | 1331 | NaN  | <b>1331</b>   |
| UBE2S    | -0,344297 | -0,215565 | <b>-0,279931</b>  | 1759 | 2519 | <b>2139</b>   |
| VSTM1    | 0,133789  | -0,693416 | <b>-0,2798135</b> | 1739 | 1916 | <b>1827,5</b> |
| MEOX2    | 0,093654  | -0,652935 | <b>-0,2796405</b> | 1311 | 1652 | <b>1481,5</b> |
| PSD3     | -0,803118 | 0,244125  | <b>-0,2794965</b> | 1800 | 2094 | <b>1947</b>   |

|          |           |           |                   |      |      |               |
|----------|-----------|-----------|-------------------|------|------|---------------|
| ATG16L2  | -0,586837 | 0,028039  | <b>-0,279399</b>  | 1878 | 1989 | <b>1933,5</b> |
| ANKS6    | 0,303293  | -0,861654 | <b>-0,2791805</b> | 1602 | 2976 | <b>2289</b>   |
| SCN9A    | -0,614881 | 0,056574  | <b>-0,2791535</b> | 2450 | 2792 | <b>2621</b>   |
| RIT2     | NaN       | -0,279102 | <b>-0,279102</b>  | NaN  | 2174 | <b>2174</b>   |
| MRPS34   | -0,33161  | -0,22648  | <b>-0,279045</b>  | 950  | 1417 | <b>1183,5</b> |
| TUFM     | -0,074387 | -0,483626 | <b>-0,2790065</b> | 1721 | 1921 | <b>1821</b>   |
| MCMBP    | -0,612334 | 0,054741  | <b>-0,2787965</b> | 1460 | 1686 | <b>1573</b>   |
| ANKRD26  | -1,173933 | 0,616769  | <b>-0,278582</b>  | 1117 | 1707 | <b>1412</b>   |
| TDO2     | -0,246364 | -0,310421 | <b>-0,2783925</b> | 1666 | 1796 | <b>1731</b>   |
| PCDHAC2  | -0,941078 | 0,384549  | <b>-0,2782645</b> | 1499 | 1712 | <b>1605,5</b> |
| MAFK     | -0,632186 | 0,075784  | <b>-0,278201</b>  | 1293 | 1534 | <b>1413,5</b> |
| NAT8B    | -0,072055 | -0,483036 | <b>-0,2775455</b> | 1124 | 1697 | <b>1410,5</b> |
| TOR1B    | -0,277503 | NaN       | <b>-0,277503</b>  | 1402 | NaN  | <b>1402</b>   |
| FBXW9    | -0,140671 | -0,414246 | <b>-0,2774585</b> | 1748 | 2301 | <b>2024,5</b> |
| TMOD2    | -0,316464 | -0,238412 | <b>-0,277438</b>  | 1846 | 1864 | <b>1855</b>   |
| PPAP2B   | -0,299833 | -0,255029 | <b>-0,277431</b>  | 1685 | 2187 | <b>1936</b>   |
| SLC6A19  | 0,498678  | -1,053483 | <b>-0,2774025</b> | 1550 | 1591 | <b>1570,5</b> |
| CELF5    | 0,010035  | -0,564795 | <b>-0,27738</b>   | 1432 | 2051 | <b>1741,5</b> |
| PRICKLE3 | -0,03987  | -0,5145   | <b>-0,277185</b>  | 1742 | 2347 | <b>2044,5</b> |
| WIPI2    | -0,276715 | NaN       | <b>-0,276715</b>  | 879  | NaN  | <b>879</b>    |
| ARID2    | 0,152945  | -0,705738 | <b>-0,2763965</b> | 1689 | 2289 | <b>1989</b>   |
| MLLT3    | -0,761473 | 0,208752  | <b>-0,2763605</b> | 1359 | 1833 | <b>1596</b>   |
| TSPAN1   | -0,252361 | -0,299974 | <b>-0,2761675</b> | 1014 | 1713 | <b>1363,5</b> |
| ATL1     | -0,120477 | -0,431599 | <b>-0,276038</b>  | 1515 | 1671 | <b>1593</b>   |
| FGFR3    | 0,147504  | -0,699436 | <b>-0,275966</b>  | 1805 | 1784 | <b>1794,5</b> |
| GPR61    | -0,275875 | NaN       | <b>-0,275875</b>  | 1529 | NaN  | <b>1529</b>   |
| HMGCS2   | 0,133011  | -0,683821 | <b>-0,275405</b>  | 1580 | 1523 | <b>1551,5</b> |
| FBXO27   | -0,437459 | -0,112864 | <b>-0,2751615</b> | 1729 | 2581 | <b>2155</b>   |
| PSMB4    | -0,465634 | -0,083842 | <b>-0,274738</b>  | 960  | 1481 | <b>1220,5</b> |
| GRXCR2   | -0,053377 | -0,495376 | <b>-0,2743765</b> | 1756 | 2669 | <b>2212,5</b> |
| IL7R     | -1,19965  | 0,651345  | <b>-0,2741525</b> | 1826 | 2780 | <b>2303</b>   |
| FGGY     | -0,587306 | 0,039008  | <b>-0,274149</b>  | 1376 | 1637 | <b>1506,5</b> |
| PGBD5    | -0,478583 | -0,069674 | <b>-0,2741285</b> | 1775 | 2051 | <b>1913</b>   |
| DFNB31   | 0,782526  | -1,330514 | <b>-0,273994</b>  | 1640 | 1768 | <b>1704</b>   |

|          |           |           |                   |      |      |               |
|----------|-----------|-----------|-------------------|------|------|---------------|
| GAL3ST1  | -0,526476 | -0,021459 | <b>-0,2739675</b> | 1475 | 2513 | <b>1994</b>   |
| TMED8    | -0,273707 | NaN       | <b>-0,273707</b>  | 1456 | NaN  | <b>1456</b>   |
| C14orf49 | -0,092258 | -0,455039 | <b>-0,2736485</b> | 1509 | 1987 | <b>1748</b>   |
| CCDC96   | -0,273593 | NaN       | <b>-0,273593</b>  | 1547 | NaN  | <b>1547</b>   |
| PDE9A    | -0,259731 | -0,287423 | <b>-0,273577</b>  | 1286 | 1540 | <b>1413</b>   |
| PHB2     | -0,256385 | -0,290611 | <b>-0,273498</b>  | 1631 | 2056 | <b>1843,5</b> |
| USP12    | -0,016918 | -0,529668 | <b>-0,273293</b>  | 1889 | 2045 | <b>1967</b>   |
| DDX46    | -0,006022 | -0,540374 | <b>-0,273198</b>  | 1603 | 1766 | <b>1684,5</b> |
| DHCR7    | -0,658146 | 0,111881  | <b>-0,2731325</b> | 1388 | 2118 | <b>1753</b>   |
| CD63     | -0,273097 | NaN       | <b>-0,273097</b>  | 2026 | NaN  | <b>2026</b>   |
| SPINK6   | -0,27303  | NaN       | <b>-0,27303</b>   | 2060 | NaN  | <b>2060</b>   |
| ID2      | -0,018315 | -0,527286 | <b>-0,2728005</b> | 1635 | 3315 | <b>2475</b>   |
| UBE2K    | -1,135349 | 0,589989  | <b>-0,27268</b>   | 1727 | 2222 | <b>1974,5</b> |
| HES1     | -0,856824 | 0,311643  | <b>-0,2725905</b> | 1135 | 1928 | <b>1531,5</b> |
| NDUFB5   | -0,557286 | 0,012354  | <b>-0,272466</b>  | 1296 | 1955 | <b>1625,5</b> |
| ABCG5    | 0,113196  | -0,657661 | <b>-0,2722325</b> | 1905 | 2795 | <b>2350</b>   |
| HOXB3    | -0,004958 | -0,538927 | <b>-0,2719425</b> | 1398 | 2259 | <b>1828,5</b> |
| MAML3    | -0,785766 | 0,241956  | <b>-0,271905</b>  | 1358 | 1491 | <b>1424,5</b> |
| CBLN3    | -0,370638 | -0,173146 | <b>-0,271892</b>  | 1907 | 2003 | <b>1955</b>   |
| BUB1B    | -0,187221 | -0,356064 | <b>-0,2716425</b> | 1568 | 1322 | <b>1445</b>   |
| PCNP     | -0,509625 | -0,03354  | <b>-0,2715825</b> | 1196 | 1975 | <b>1585,5</b> |
| CALU     | -0,407624 | -0,13541  | <b>-0,271517</b>  | 1266 | 1485 | <b>1375,5</b> |
| MAP2K3   | -0,643149 | 0,10082   | <b>-0,2711645</b> | 1657 | 1732 | <b>1694,5</b> |
| U2AF2    | -0,276912 | -0,265386 | <b>-0,271149</b>  | 1200 | 1735 | <b>1467,5</b> |
| DLGAP2   | -0,270846 | NaN       | <b>-0,270846</b>  | 1982 | NaN  | <b>1982</b>   |
| TRAF3IP1 | -0,270744 | NaN       | <b>-0,270744</b>  | 1819 | NaN  | <b>1819</b>   |
| SLAIN1   | -0,27072  | NaN       | <b>-0,27072</b>   | 1201 | NaN  | <b>1201</b>   |
| NCOA2    | 0,039049  | -0,579202 | <b>-0,2700765</b> | 1771 | 2081 | <b>1926</b>   |
| VTA1     | -0,270062 | NaN       | <b>-0,270062</b>  | 1487 | NaN  | <b>1487</b>   |
| DPH1     | -0,270004 | NaN       | <b>-0,270004</b>  | 1268 | NaN  | <b>1268</b>   |
| NEUROD6  | -0,002336 | -0,537037 | <b>-0,2696865</b> | 1660 | 1892 | <b>1776</b>   |
| PPP6C    | -0,187365 | -0,351691 | <b>-0,269528</b>  | 1388 | 2079 | <b>1733,5</b> |
| OS9      | -0,269513 | NaN       | <b>-0,269513</b>  | 1211 | NaN  | <b>1211</b>   |
| C1QL1    | -0,269465 | NaN       | <b>-0,269465</b>  | 1899 | NaN  | <b>1899</b>   |

|          |           |           |                   |      |      |               |
|----------|-----------|-----------|-------------------|------|------|---------------|
| DIRC1    | 0,72101   | -1,259878 | <b>-0,269434</b>  | 1471 | 1611 | <b>1541</b>   |
| BAX      | -0,323009 | -0,215015 | <b>-0,269012</b>  | 959  | 1522 | <b>1240,5</b> |
| GPC5     | 0,026447  | -0,564319 | <b>-0,268936</b>  | 937  | 1123 | <b>1030</b>   |
| ANKMY2   | -0,716815 | 0,179261  | <b>-0,268777</b>  | 1716 | 1661 | <b>1688,5</b> |
| DMD      | -0,268724 | NaN       | <b>-0,268724</b>  | 1946 | NaN  | <b>1946</b>   |
| PDCD10   | -0,285454 | -0,251974 | <b>-0,268714</b>  | 1599 | 1688 | <b>1643,5</b> |
| TAF13    | -0,524154 | -0,013051 | <b>-0,2686025</b> | 1206 | 1866 | <b>1536</b>   |
| NME7     | 0,140649  | -0,677699 | <b>-0,268525</b>  | 1777 | 2589 | <b>2183</b>   |
| AKR7L    | -0,115319 | -0,421658 | <b>-0,2684885</b> | 2112 | 2162 | <b>2137</b>   |
| WDR6     | -0,268446 | NaN       | <b>-0,268446</b>  | 1533 | NaN  | <b>1533</b>   |
| KCTD2    | -0,283179 | -0,253693 | <b>-0,268436</b>  | 2264 | 2374 | <b>2319</b>   |
| MIER1    | 0,32366   | -0,860466 | <b>-0,268403</b>  | 1576 | 2250 | <b>1913</b>   |
| NME5     | -0,58201  | 0,045354  | <b>-0,268328</b>  | 1342 | 2301 | <b>1821,5</b> |
| ZNF2     | -0,074672 | -0,461981 | <b>-0,2683265</b> | 1621 | 2088 | <b>1854,5</b> |
| POGLUT1  | -0,267949 | NaN       | <b>-0,267949</b>  | 1904 | NaN  | <b>1904</b>   |
| C2orf16  | -0,161259 | -0,374207 | <b>-0,267733</b>  | 1266 | 1900 | <b>1583</b>   |
| CHMP6    | -0,887788 | 0,35255   | <b>-0,267619</b>  | 1558 | 1948 | <b>1753</b>   |
| OR51S1   | 0,522035  | -1,057265 | <b>-0,267615</b>  | 1371 | 1475 | <b>1423</b>   |
| METTL6   | -0,609963 | 0,075075  | <b>-0,267444</b>  | 1677 | 1897 | <b>1787</b>   |
| IBSP     | -0,099431 | -0,435394 | <b>-0,2674125</b> | 1364 | 2245 | <b>1804,5</b> |
| SPHK1    | -0,444953 | -0,089108 | <b>-0,2670305</b> | 2222 | 1846 | <b>2034</b>   |
| SLC7A9   | 0,125815  | -0,659491 | <b>-0,266838</b>  | 1422 | 1758 | <b>1590</b>   |
| FAF1     | -0,674738 | 0,141082  | <b>-0,266828</b>  | 1055 | 1833 | <b>1444</b>   |
| NSMAF    | -1,014711 | 0,481849  | <b>-0,266431</b>  | 1922 | 2103 | <b>2012,5</b> |
| MITF     | -0,468085 | -0,064729 | <b>-0,266407</b>  | 1588 | 1771 | <b>1679,5</b> |
| FGF1     | -0,939206 | 0,407822  | <b>-0,265692</b>  | 1399 | 1662 | <b>1530,5</b> |
| FIGNL2   | -0,566015 | 0,03467   | <b>-0,2656725</b> | 1577 | 2260 | <b>1918,5</b> |
| SEC62    | 0,132563  | -0,663894 | <b>-0,2656655</b> | 1531 | 2339 | <b>1935</b>   |
| MRPL37   | -0,84351  | 0,312791  | <b>-0,2653595</b> | 1864 | 2405 | <b>2134,5</b> |
| RTDR1    | -0,257786 | -0,27264  | <b>-0,265213</b>  | 1132 | 1200 | <b>1166</b>   |
| TOM1L1   | -0,404225 | -0,124583 | <b>-0,264404</b>  | 1694 | 2636 | <b>2165</b>   |
| C12orf12 | -0,5759   | 0,047329  | <b>-0,2642855</b> | 1836 | 2446 | <b>2141</b>   |
| ZNF330   | -0,121639 | -0,406901 | <b>-0,26427</b>   | 1497 | 2358 | <b>1927,5</b> |
| HHIPL1   | -0,127404 | -0,401064 | <b>-0,264234</b>  | 1612 | 1977 | <b>1794,5</b> |

|          |           |           |                   |      |      |               |
|----------|-----------|-----------|-------------------|------|------|---------------|
| GTPBP5   | 0,140362  | -0,668775 | <b>-0,2642065</b> | 1744 | 1989 | <b>1866,5</b> |
| C4orf47  | -0,334114 | -0,194044 | <b>-0,264079</b>  | 2075 | 2365 | <b>2220</b>   |
| CCNB1IP1 | 1,746832  | -2,274476 | <b>-0,263822</b>  | 1873 | 2037 | <b>1955</b>   |
| LRRC20   | 0,17027   | -0,697834 | <b>-0,263782</b>  | 1348 | 1212 | <b>1280</b>   |
| CNGB3    | -0,644575 | 0,117115  | <b>-0,26373</b>   | 1766 | 2453 | <b>2109,5</b> |
| TNNT3    | 0,06175   | -0,58881  | <b>-0,26353</b>   | 1215 | 1936 | <b>1575,5</b> |
| VRK1     | -0,401537 | -0,125306 | <b>-0,2634215</b> | 2262 | 2612 | <b>2437</b>   |
| PAICS    | 0,295671  | -0,822204 | <b>-0,2632665</b> | 1691 | 1857 | <b>1774</b>   |
| PADI2    | -0,724448 | 0,198472  | <b>-0,262988</b>  | 1621 | 1716 | <b>1668,5</b> |
| OR8B4    | -0,074695 | -0,451213 | <b>-0,262954</b>  | 1332 | 1783 | <b>1557,5</b> |
| TMEM8A   | 0,477912  | -1,003682 | <b>-0,262885</b>  | 1957 | 1650 | <b>1803,5</b> |
| ABCA1    | -0,813465 | 0,287746  | <b>-0,2628595</b> | 1548 | 2372 | <b>1960</b>   |
| CHST2    | 0,008341  | -0,533974 | <b>-0,2628165</b> | 1582 | 1984 | <b>1783</b>   |
| GNL1     | 0,412134  | -0,937674 | <b>-0,26277</b>   | 1338 | 2392 | <b>1865</b>   |
| TAT      | -0,61203  | 0,086616  | <b>-0,262707</b>  | 1382 | 1864 | <b>1623</b>   |
| CTSB     | 0,315567  | -0,840942 | <b>-0,2626875</b> | 1674 | 2363 | <b>2018,5</b> |
| PVRL3    | -0,664542 | 0,139646  | <b>-0,262448</b>  | 1193 | 1518 | <b>1355,5</b> |
| FAM176B  | -0,262298 | NaN       | <b>-0,262298</b>  | 1698 | NaN  | <b>1698</b>   |
| TRIM64C  | -0,474662 | -0,049152 | <b>-0,261907</b>  | 1748 | 2047 | <b>1897,5</b> |
| RNF111   | -0,459289 | -0,064249 | <b>-0,261769</b>  | 2496 | 2686 | <b>2591</b>   |
| SOCS4    | -0,158765 | -0,364489 | <b>-0,261627</b>  | 1839 | 2616 | <b>2227,5</b> |
| PCDHB6   | 0,212616  | -0,735627 | <b>-0,2615055</b> | 1608 | 2474 | <b>2041</b>   |
| KIAA0586 | -0,735017 | 0,213194  | <b>-0,2609115</b> | 1466 | 2098 | <b>1782</b>   |
| NLGN1    | NaN       | -0,260749 | <b>-0,260749</b>  | NaN  | 2935 | <b>2935</b>   |
| ZNF75A   | 0,500929  | -1,022388 | <b>-0,2607295</b> | 1945 | 2225 | <b>2085</b>   |
| KRT10    | -0,312272 | -0,209111 | <b>-0,2606915</b> | 1772 | 1910 | <b>1841</b>   |
| HSPA12B  | -0,260599 | NaN       | <b>-0,260599</b>  | 1899 | NaN  | <b>1899</b>   |
| SLC14A1  | 0,101234  | -0,621969 | <b>-0,2603675</b> | 854  | 1347 | <b>1100,5</b> |
| AKAP3    | 0,140391  | -0,66098  | <b>-0,2602945</b> | 1948 | 2040 | <b>1994</b>   |
| MYO22    | -0,438919 | -0,081326 | <b>-0,2601225</b> | 1627 | 1801 | <b>1714</b>   |
| CTC1     | -0,260076 | NaN       | <b>-0,260076</b>  | 1333 | NaN  | <b>1333</b>   |
| HERC1    | -0,527316 | 0,007272  | <b>-0,260022</b>  | 2309 | 3210 | <b>2759,5</b> |
| SLFN11   | -0,69531  | 0,175294  | <b>-0,260008</b>  | 1785 | 1981 | <b>1883</b>   |
| RPL35A   | 0,353904  | -0,87353  | <b>-0,259813</b>  | 1077 | 1354 | <b>1215,5</b> |

|           |           |           |                   |      |      |               |
|-----------|-----------|-----------|-------------------|------|------|---------------|
| KLK10     | -0,556695 | 0,037211  | <b>-0,259742</b>  | 1728 | 1804 | <b>1766</b>   |
| FAM84A    | -0,259586 | NaN       | <b>-0,259586</b>  | 1648 | NaN  | <b>1648</b>   |
| SOCS2     | -0,243455 | -0,27544  | <b>-0,2594475</b> | 765  | 1452 | <b>1108,5</b> |
| LINC00478 | -0,021118 | -0,497062 | <b>-0,25909</b>   | 1826 | 2719 | <b>2272,5</b> |
| PNPLA7    | 0,283056  | -0,800882 | <b>-0,258913</b>  | 2165 | 2362 | <b>2263,5</b> |
| TAF1A     | 0,559772  | -1,077435 | <b>-0,2588315</b> | 1143 | 1686 | <b>1414,5</b> |
| EVX2      | -0,121324 | -0,395351 | <b>-0,2583375</b> | 1824 | 1714 | <b>1769</b>   |
| SPATS2L   | -0,193787 | -0,322721 | <b>-0,258254</b>  | 1721 | 1937 | <b>1829</b>   |
| KLHDC7A   | -0,181769 | -0,334687 | <b>-0,258228</b>  | 1394 | 2074 | <b>1734</b>   |
| CPNE4     | -0,068093 | -0,448154 | <b>-0,2581235</b> | 2151 | 2313 | <b>2232</b>   |
| FCRLA     | -0,257776 | NaN       | <b>-0,257776</b>  | 1538 | NaN  | <b>1538</b>   |
| MAPKAPK3  | 0,135208  | -0,650544 | <b>-0,257668</b>  | 1744 | 2112 | <b>1928</b>   |
| CD82      | 0,636646  | -1,151956 | <b>-0,257655</b>  | 1155 | 2236 | <b>1695,5</b> |
| GRIK2     | -0,410332 | -0,102613 | <b>-0,2564725</b> | 1724 | 2284 | <b>2004</b>   |
| MLL5      | -0,345828 | -0,166782 | <b>-0,256305</b>  | 1553 | 2223 | <b>1888</b>   |
| LOC284009 | -0,255797 | NaN       | <b>-0,255797</b>  | 1780 | NaN  | <b>1780</b>   |
| POP1      | -0,123379 | -0,3878   | <b>-0,2555895</b> | 1414 | 2131 | <b>1772,5</b> |
| ZNF687    | -0,512897 | 0,001755  | <b>-0,255571</b>  | 1349 | 2087 | <b>1718</b>   |
| PTPN4     | -0,20297  | -0,307732 | <b>-0,255351</b>  | 1699 | 2251 | <b>1975</b>   |
| AKR1CL1   | 0,179061  | -0,689761 | <b>-0,25535</b>   | 2352 | 2311 | <b>2331,5</b> |
| CORO1B    | -0,774291 | 0,263696  | <b>-0,2552975</b> | 1555 | 1854 | <b>1704,5</b> |
| ZNF280C   | -1,084225 | 0,57386   | <b>-0,2551825</b> | 2247 | 2161 | <b>2204</b>   |
| PARL      | 0,485536  | -0,995117 | <b>-0,2547905</b> | 1243 | 2187 | <b>1715</b>   |
| FGL1      | -1,617946 | 1,108529  | <b>-0,2547085</b> | 1774 | 2290 | <b>2032</b>   |
| TLE4      | -0,611321 | 0,101991  | <b>-0,254665</b>  | 1619 | 2215 | <b>1917</b>   |
| ZNF227    | 0,074879  | -0,583915 | <b>-0,254518</b>  | 1583 | 1795 | <b>1689</b>   |
| TPD52L2   | -0,254473 | NaN       | <b>-0,254473</b>  | 1516 | NaN  | <b>1516</b>   |
| RICTOR    | -0,3482   | -0,16071  | <b>-0,254455</b>  | 2055 | 2331 | <b>2193</b>   |
| RHPN1     | 0,060494  | -0,56913  | <b>-0,254318</b>  | 1640 | 1505 | <b>1572,5</b> |
| SPRR1B    | 0,133612  | -0,641725 | <b>-0,2540565</b> | 1215 | 1585 | <b>1400</b>   |
| KRTAP4-12 | -0,096249 | -0,411759 | <b>-0,254004</b>  | 1259 | 1683 | <b>1471</b>   |
| F3        | -0,231399 | -0,276335 | <b>-0,253867</b>  | 1589 | 1900 | <b>1744,5</b> |
| UNC13A    | -1,007084 | 0,499382  | <b>-0,253851</b>  | 1913 | 2523 | <b>2218</b>   |
| SPEF2     | -0,615511 | 0,108149  | <b>-0,253681</b>  | 1051 | 1238 | <b>1144,5</b> |

|          |           |           |                   |      |      |               |
|----------|-----------|-----------|-------------------|------|------|---------------|
| GABRA1   | 0,028197  | -0,535434 | <b>-0,2536185</b> | 1672 | 1663 | <b>1667,5</b> |
| KIAA1826 | -0,10778  | -0,399169 | <b>-0,2534745</b> | 1685 | 2538 | <b>2111,5</b> |
| PLEKHA4  | 0,792289  | -1,299187 | <b>-0,253449</b>  | 1611 | 1939 | <b>1775</b>   |
| RECQL    | 0,388618  | -0,895428 | <b>-0,253405</b>  | 1386 | 1615 | <b>1500,5</b> |
| COL22A1  | -0,964249 | 0,457462  | <b>-0,2533935</b> | 1605 | 1585 | <b>1595</b>   |
| FAHD1    | -0,79335  | 0,286658  | <b>-0,253346</b>  | 1636 | 1712 | <b>1674</b>   |
| HSPA4L   | -0,120117 | -0,386146 | <b>-0,2531315</b> | 1921 | 2434 | <b>2177,5</b> |
| PNLIP    | 0,255224  | -0,761088 | <b>-0,252932</b>  | 1112 | 2347 | <b>1729,5</b> |
| KCNK9    | 0,248115  | -0,753917 | <b>-0,252901</b>  | 1652 | 2524 | <b>2088</b>   |
| ARHGEF17 | -0,294381 | -0,211265 | <b>-0,252823</b>  | 2004 | 2010 | <b>2007</b>   |
| C19orf52 | 0,070701  | -0,576242 | <b>-0,2527705</b> | 1544 | 2299 | <b>1921,5</b> |
| GZMA     | -0,30875  | -0,196419 | <b>-0,2525845</b> | 1353 | 2424 | <b>1888,5</b> |
| IL12RB2  | -0,088335 | -0,416469 | <b>-0,252402</b>  | 1603 | 1712 | <b>1657,5</b> |
| TOX4     | -0,060808 | -0,443992 | <b>-0,2524</b>    | 498  | 896  | <b>697</b>    |
| SH3BP5L  | 0,018179  | -0,522777 | <b>-0,252299</b>  | 1745 | 1893 | <b>1819</b>   |
| DCAF7    | -1,016249 | 0,511878  | <b>-0,2521855</b> | 1748 | 2237 | <b>1992,5</b> |
| CLN3     | -0,011186 | -0,492927 | <b>-0,2520565</b> | 1600 | 1533 | <b>1566,5</b> |
| SCNN1G   | -0,794127 | 0,290357  | <b>-0,251885</b>  | 1887 | 2444 | <b>2165,5</b> |
| CTLA4    | -0,251771 | NaN       | <b>-0,251771</b>  | 1532 | NaN  | <b>1532</b>   |
| GK2      | -0,668252 | 0,165206  | <b>-0,251523</b>  | 1901 | 2542 | <b>2221,5</b> |
| TMCO1    | -0,629127 | 0,126873  | <b>-0,251127</b>  | 1741 | 2371 | <b>2056</b>   |
| FUT6     | -0,158335 | -0,343731 | <b>-0,251033</b>  | 1639 | 2950 | <b>2294,5</b> |
| TMEM171  | -0,284411 | -0,216775 | <b>-0,250593</b>  | 1533 | 2367 | <b>1950</b>   |
| ATP6AP1  | 0,582385  | -1,083564 | <b>-0,2505895</b> | 1456 | 2108 | <b>1782</b>   |
| CD28     | -0,410388 | -0,090593 | <b>-0,2504905</b> | 1160 | 1716 | <b>1438</b>   |
| C2orf69  | -0,734406 | 0,233463  | <b>-0,2504715</b> | 1038 | 2009 | <b>1523,5</b> |
| TMEM120B | -0,282025 | -0,218878 | <b>-0,2504515</b> | 1850 | 2143 | <b>1996,5</b> |
| ZNF785   | -0,4532   | -0,047673 | <b>-0,2504365</b> | 1976 | 2164 | <b>2070</b>   |
| IGFBP2   | -0,304594 | -0,196229 | <b>-0,2504115</b> | 936  | 2739 | <b>1837,5</b> |
| PEG10    | -0,356578 | -0,143555 | <b>-0,2500665</b> | 1871 | 2301 | <b>2086</b>   |
| OTOL1    | -0,249904 | NaN       | <b>-0,249904</b>  | 2046 | NaN  | <b>2046</b>   |
| CD300A   | -0,661144 | 0,161669  | <b>-0,2497375</b> | 1812 | 1977 | <b>1894,5</b> |
| AHDC1    | -0,249578 | NaN       | <b>-0,249578</b>  | 1410 | NaN  | <b>1410</b>   |
| ZNF214   | -0,621129 | 0,122075  | <b>-0,249527</b>  | 1705 | 1801 | <b>1753</b>   |

|         |           |           |                   |      |      |               |
|---------|-----------|-----------|-------------------|------|------|---------------|
| NDST4   | -0,108086 | -0,390395 | <b>-0,2492405</b> | 1537 | 2228 | <b>1882,5</b> |
| IL1RL2  | 0,316297  | -0,814662 | <b>-0,2491825</b> | 1828 | 1943 | <b>1885,5</b> |
| PTPN22  | -0,538984 | 0,040734  | <b>-0,249125</b>  | 1477 | 2218 | <b>1847,5</b> |
| RHBDL3  | -0,517332 | 0,019101  | <b>-0,2491155</b> | 1736 | 1335 | <b>1535,5</b> |
| COL20A1 | -0,248872 | NaN       | <b>-0,248872</b>  | 1664 | NaN  | <b>1664</b>   |
| HCST    | -0,669367 | 0,171765  | <b>-0,248801</b>  | 1202 | 2098 | <b>1650</b>   |
| RDH10   | -0,078772 | -0,41757  | <b>-0,248171</b>  | 1101 | 1815 | <b>1458</b>   |
| AHCTF1  | NaN       | -0,248146 | <b>-0,248146</b>  | NaN  | 2046 | <b>2046</b>   |
| CBL     | -0,623345 | 0,127155  | <b>-0,248095</b>  | 1824 | 3261 | <b>2542,5</b> |
| PCDHA1  | -0,136645 | -0,358777 | <b>-0,247711</b>  | 1345 | 2148 | <b>1746,5</b> |
| SHOX    | 0,315188  | -0,81017  | <b>-0,247491</b>  | 1731 | 2150 | <b>1940,5</b> |
| TMEM187 | 0,061634  | -0,556202 | <b>-0,247284</b>  | 1257 | 1402 | <b>1329,5</b> |
| LCK     | 2,041611  | -2,536057 | <b>-0,247223</b>  | 1676 | 2282 | <b>1979</b>   |
| DGKZ    | -0,247061 | NaN       | <b>-0,247061</b>  | 1277 | NaN  | <b>1277</b>   |
| RASGRF2 | -0,246918 | NaN       | <b>-0,246918</b>  | 2081 | NaN  | <b>2081</b>   |
| DACH1   | 0,592932  | -1,085994 | <b>-0,246531</b>  | 1858 | 1592 | <b>1725</b>   |
| MRPL18  | -0,175465 | -0,317483 | <b>-0,246474</b>  | 1717 | 1953 | <b>1835</b>   |
| TEC     | -0,865618 | 0,372692  | <b>-0,246463</b>  | 1951 | 2106 | <b>2028,5</b> |
| NAF1    | -0,043726 | -0,449061 | <b>-0,2463935</b> | 2001 | 1965 | <b>1983</b>   |
| PIEZO2  | -0,243468 | -0,248759 | <b>-0,2461135</b> | 1857 | 2033 | <b>1945</b>   |
| KAZN    | -0,427829 | -0,064322 | <b>-0,2460755</b> | 1463 | 1834 | <b>1648,5</b> |
| C8orf33 | -0,245982 | NaN       | <b>-0,245982</b>  | 1626 | NaN  | <b>1626</b>   |
| ERCC6L  | 0,427192  | -0,918662 | <b>-0,245735</b>  | 1653 | 1988 | <b>1820,5</b> |
| PCDHGA2 | -0,245659 | NaN       | <b>-0,245659</b>  | 1733 | NaN  | <b>1733</b>   |
| B3GNT9  | -0,062228 | -0,428782 | <b>-0,245505</b>  | 1653 | 1872 | <b>1762,5</b> |
| PTPN3   | 1,198787  | -1,689622 | <b>-0,2454175</b> | 1673 | 2173 | <b>1923</b>   |
| SH2D1B  | 0,074924  | -0,565065 | <b>-0,2450705</b> | 1702 | 1771 | <b>1736,5</b> |
| CPSF7   | 0,760257  | -1,250221 | <b>-0,244982</b>  | 1985 | 2093 | <b>2039</b>   |
| NPR1    | -0,244889 | NaN       | <b>-0,244889</b>  | 1689 | NaN  | <b>1689</b>   |
| CCDC48  | -0,278051 | -0,211212 | <b>-0,2446315</b> | 1836 | 2594 | <b>2215</b>   |
| ZFP36   | -0,244525 | NaN       | <b>-0,244525</b>  | 1744 | NaN  | <b>1744</b>   |
| RHAG    | -1,129528 | 0,640957  | <b>-0,2442855</b> | 1677 | 2324 | <b>2000,5</b> |
| AGBL5   | -0,090506 | -0,397976 | <b>-0,244241</b>  | 1277 | 1861 | <b>1569</b>   |
| MSRA    | 0,008836  | -0,497082 | <b>-0,244123</b>  | 1223 | 1671 | <b>1447</b>   |



|          |           |           |                   |      |      |               |
|----------|-----------|-----------|-------------------|------|------|---------------|
| DAP3     | -0,518189 | 0,030459  | <b>-0,243865</b>  | 1025 | 1325 | <b>1175</b>   |
| STK17A   | -1,096465 | 0,608884  | <b>-0,2437905</b> | 2070 | 2120 | <b>2095</b>   |
| MFAP2    | -0,526566 | 0,039205  | <b>-0,2436805</b> | 1927 | 2236 | <b>2081,5</b> |
| VPS26A   | -0,075379 | -0,411926 | <b>-0,2436525</b> | 1869 | 1857 | <b>1863</b>   |
| PIP4K2A  | -0,455745 | -0,031425 | <b>-0,243585</b>  | 2031 | 2316 | <b>2173,5</b> |
| CTXN1    | -0,553034 | 0,065967  | <b>-0,2435335</b> | 1418 | 1988 | <b>1703</b>   |
| MMP12    | -0,069607 | -0,417072 | <b>-0,2433395</b> | 1422 | 2287 | <b>1854,5</b> |
| SMAP1    | -0,6502   | 0,163702  | <b>-0,243249</b>  | 1685 | 2330 | <b>2007,5</b> |
| AKR1D1   | -0,042813 | -0,443505 | <b>-0,243159</b>  | 1587 | 2867 | <b>2227</b>   |
| PDE2A    | 0,723897  | -1,210091 | <b>-0,243097</b>  | 1313 | 2063 | <b>1688</b>   |
| UFC1     | -0,546854 | 0,061361  | <b>-0,2427465</b> | 1309 | 1778 | <b>1543,5</b> |
| SHISA5   | 0,032553  | -0,517806 | <b>-0,2426265</b> | 1473 | 2058 | <b>1765,5</b> |
| TRO      | -0,242593 | NaN       | <b>-0,242593</b>  | 1610 | NaN  | <b>1610</b>   |
| FCHSD2   | -0,460953 | -0,024186 | <b>-0,2425695</b> | 2237 | 1932 | <b>2084,5</b> |
| OR5T1    | -0,136207 | -0,347498 | <b>-0,2418525</b> | 2062 | 1986 | <b>2024</b>   |
| ZRANB1   | -1,064406 | 0,580825  | <b>-0,2417905</b> | 1493 | 1489 | <b>1491</b>   |
| FES      | -0,59919  | 0,115856  | <b>-0,241667</b>  | 1507 | 2384 | <b>1945,5</b> |
| DNAJC3   | -0,852757 | 0,370206  | <b>-0,2412755</b> | 1758 | 2234 | <b>1996</b>   |
| CLNS1A   | -0,056759 | -0,424853 | <b>-0,240806</b>  | 1430 | 2061 | <b>1745,5</b> |
| HIPK2    | -0,874007 | 0,392437  | <b>-0,240785</b>  | 1897 | 2690 | <b>2293,5</b> |
| IKBKAP   | 0,078127  | -0,55954  | <b>-0,2407065</b> | 1870 | 2389 | <b>2129,5</b> |
| EXOSC3   | 0,312384  | -0,793492 | <b>-0,240554</b>  | 1585 | 1779 | <b>1682</b>   |
| SERPINB6 | -0,680321 | 0,199216  | <b>-0,2405525</b> | 1732 | 2051 | <b>1891,5</b> |
| KIAA0020 | 0,004018  | -0,484984 | <b>-0,240483</b>  | 823  | 1725 | <b>1274</b>   |
| SIX5     | -0,240428 | NaN       | <b>-0,240428</b>  | 1623 | NaN  | <b>1623</b>   |
| BPIFA3   | -1,132343 | 0,651663  | <b>-0,24034</b>   | 1274 | 2113 | <b>1693,5</b> |
| IGSF9    | 0,025546  | -0,505981 | <b>-0,2402175</b> | 1486 | 2132 | <b>1809</b>   |
| IRF1     | 0,093699  | -0,573974 | <b>-0,2401375</b> | 2253 | 1942 | <b>2097,5</b> |
| TMCO4    | 0,426772  | -0,906943 | <b>-0,2400855</b> | 1945 | 2413 | <b>2179</b>   |
| GCK      | 0,10697   | -0,58704  | <b>-0,240035</b>  | 1317 | 2173 | <b>1745</b>   |
| PANX3    | -0,482804 | 0,002815  | <b>-0,2399945</b> | 1505 | 1953 | <b>1729</b>   |
| CCL7     | 0,554925  | -1,034712 | <b>-0,2398935</b> | 1175 | 2221 | <b>1698</b>   |
| MYL12A   | -0,349403 | -0,13004  | <b>-0,2397215</b> | 2143 | 2318 | <b>2230,5</b> |
| CCL5     | -0,353068 | -0,12633  | <b>-0,239699</b>  | 1532 | 1716 | <b>1624</b>   |

|          |           |           |                   |      |      |               |
|----------|-----------|-----------|-------------------|------|------|---------------|
| DTYMK    | -0,378588 | -0,100679 | <b>-0,2396335</b> | 1570 | 2072 | <b>1821</b>   |
| KRT73    | -0,239415 | NaN       | <b>-0,239415</b>  | 1751 | NaN  | <b>1751</b>   |
| SCGB2A2  | 0,372822  | -0,851502 | <b>-0,23934</b>   | 2059 | 2720 | <b>2389,5</b> |
| FAM178A  | -0,23917  | NaN       | <b>-0,23917</b>   | 1623 | NaN  | <b>1623</b>   |
| TAS2R9   | -0,314948 | -0,163035 | <b>-0,2389915</b> | 2236 | 2874 | <b>2555</b>   |
| PEMT     | -0,350561 | -0,127419 | <b>-0,23899</b>   | 1840 | 2929 | <b>2384,5</b> |
| C2orf65  | 0,135671  | -0,613624 | <b>-0,2389765</b> | 1295 | 1839 | <b>1567</b>   |
| CACNB4   | 0,063244  | -0,540484 | <b>-0,23862</b>   | 2171 | 3011 | <b>2591</b>   |
| NPM3     | -0,753335 | 0,276212  | <b>-0,2385615</b> | 1525 | 2422 | <b>1973,5</b> |
| BDH2     | -0,344798 | -0,132166 | <b>-0,238482</b>  | 806  | 1417 | <b>1111,5</b> |
| GEMIN5   | -0,238146 | NaN       | <b>-0,238146</b>  | 1616 | NaN  | <b>1616</b>   |
| ART5     | -0,008891 | -0,467271 | <b>-0,238081</b>  | 1646 | 2474 | <b>2060</b>   |
| CCDC25   | -0,668586 | 0,192476  | <b>-0,238055</b>  | 1386 | 1791 | <b>1588,5</b> |
| FAM171A1 | 0,086229  | -0,562183 | <b>-0,237977</b>  | 1396 | 1942 | <b>1669</b>   |
| GPR107   | -0,064912 | -0,410532 | <b>-0,237722</b>  | 1643 | 1657 | <b>1650</b>   |
| RTP1     | -0,237646 | NaN       | <b>-0,237646</b>  | 1771 | NaN  | <b>1771</b>   |
| AIRE     | -0,402807 | -0,072477 | <b>-0,237642</b>  | 1535 | 1862 | <b>1698,5</b> |
| ACSF2    | -0,429515 | -0,045741 | <b>-0,237628</b>  | 1782 | 2377 | <b>2079,5</b> |
| VCPIP1   | -0,237128 | NaN       | <b>-0,237128</b>  | 1611 | NaN  | <b>1611</b>   |
| C6orf225 | -0,237001 | NaN       | <b>-0,237001</b>  | 1568 | NaN  | <b>1568</b>   |
| SCAI     | -0,477174 | 0,003439  | <b>-0,2368675</b> | 2140 | 1697 | <b>1918,5</b> |
| MAGEE1   | 0,127976  | -0,601263 | <b>-0,2366435</b> | 1033 | 1413 | <b>1223</b>   |
| SYTL3    | -0,269569 | -0,203632 | <b>-0,2366005</b> | 1183 | 2010 | <b>1596,5</b> |
| HTT      | NaN       | -0,236195 | <b>-0,236195</b>  | NaN  | 2183 | <b>2183</b>   |
| SH3BGR   | -0,529153 | 0,057054  | <b>-0,2360495</b> | 1832 | 1530 | <b>1681</b>   |
| HDAC8    | -0,659754 | 0,188027  | <b>-0,2358635</b> | 710  | 1246 | <b>978</b>    |
| ACSS3    | 0,002391  | -0,473876 | <b>-0,2357425</b> | 1478 | 1909 | <b>1693,5</b> |
| MPP1     | -0,372432 | -0,098837 | <b>-0,2356345</b> | 1300 | 2134 | <b>1717</b>   |
| PRG3     | 0,113891  | -0,584993 | <b>-0,235551</b>  | 1694 | 2017 | <b>1855,5</b> |
| SLC25A40 | -0,694565 | 0,223714  | <b>-0,2354255</b> | 1564 | 2602 | <b>2083</b>   |
| OR13A1   | 0,645042  | -1,115884 | <b>-0,235421</b>  | 1449 | 1910 | <b>1679,5</b> |
| AP3B2    | -0,676794 | 0,205972  | <b>-0,235411</b>  | 926  | 1168 | <b>1047</b>   |
| CTDSPL   | -0,372653 | -0,097793 | <b>-0,235223</b>  | 1758 | 2222 | <b>1990</b>   |
| DHRS7B   | -0,680176 | 0,21071   | <b>-0,234733</b>  | 1923 | 2085 | <b>2004</b>   |

|           |           |           |                   |      |      |               |
|-----------|-----------|-----------|-------------------|------|------|---------------|
| SLC47A1   | 0,797865  | -1,266266 | <b>-0,2342005</b> | 1807 | 2009 | <b>1908</b>   |
| WDR17     | -0,452458 | -0,015499 | <b>-0,2339785</b> | 1326 | 1601 | <b>1463,5</b> |
| MCF2L     | -0,233884 | NaN       | <b>-0,233884</b>  | 1434 | NaN  | <b>1434</b>   |
| TAB1      | -0,099693 | -0,367848 | <b>-0,2337705</b> | 1711 | 2358 | <b>2034,5</b> |
| TBX10     | 0,005626  | -0,473036 | <b>-0,233705</b>  | 1517 | 1914 | <b>1715,5</b> |
| SLC7A13   | NaN       | -0,233358 | <b>-0,233358</b>  | NaN  | 2880 | <b>2880</b>   |
| C8orf74   | -0,219543 | -0,246413 | <b>-0,232978</b>  | 1740 | 2657 | <b>2198,5</b> |
| ZNF671    | -0,232963 | NaN       | <b>-0,232963</b>  | 1306 | NaN  | <b>1306</b>   |
| AJAP1     | -0,232688 | NaN       | <b>-0,232688</b>  | 1233 | NaN  | <b>1233</b>   |
| CABYR     | -0,232665 | NaN       | <b>-0,232665</b>  | 1737 | NaN  | <b>1737</b>   |
| CHMP5     | -0,232615 | NaN       | <b>-0,232615</b>  | 2136 | NaN  | <b>2136</b>   |
| SPIC      | -0,457536 | -0,00703  | <b>-0,232283</b>  | 1872 | 2612 | <b>2242</b>   |
| PSAT1     | -0,59498  | 0,13044   | <b>-0,23227</b>   | 1892 | 1930 | <b>1911</b>   |
| SLC38A1   | -0,047501 | -0,416685 | <b>-0,232093</b>  | 1288 | 1952 | <b>1620</b>   |
| L3MBTL4   | 0,520684  | -0,984443 | <b>-0,2318795</b> | 1270 | 1959 | <b>1614,5</b> |
| CCNE1     | -0,137536 | -0,32611  | <b>-0,231823</b>  | 1212 | 1986 | <b>1599</b>   |
| VIPAR     | 0,159402  | -0,622937 | <b>-0,2317675</b> | 1720 | 2612 | <b>2166</b>   |
| MYPOP     | -0,186972 | -0,276393 | <b>-0,2316825</b> | 1750 | 1623 | <b>1686,5</b> |
| ZNF16     | -0,758763 | 0,295555  | <b>-0,231604</b>  | 1827 | 2087 | <b>1957</b>   |
| PLN       | -0,639279 | 0,176073  | <b>-0,231603</b>  | 1632 | 2010 | <b>1821</b>   |
| ACACA     | -0,28269  | -0,180461 | <b>-0,2315755</b> | 2003 | 1784 | <b>1893,5</b> |
| TMED3     | -0,050733 | -0,412409 | <b>-0,231571</b>  | 1230 | 1185 | <b>1207,5</b> |
| TRIM77P   | 0,139386  | -0,602124 | <b>-0,231369</b>  | 1249 | 2009 | <b>1629</b>   |
| RIN3      | -0,663099 | 0,200565  | <b>-0,231267</b>  | 1745 | 2660 | <b>2202,5</b> |
| SERPINB12 | -0,671366 | 0,208861  | <b>-0,2312525</b> | 1356 | 2494 | <b>1925</b>   |
| CSF3R     | -0,421875 | -0,040462 | <b>-0,2311685</b> | 1688 | 1999 | <b>1843,5</b> |
| ZNF557    | 0,094426  | -0,55651  | <b>-0,231042</b>  | 1770 | 2179 | <b>1974,5</b> |
| C3orf37   | -0,609774 | 0,147831  | <b>-0,2309715</b> | 1675 | 1797 | <b>1736</b>   |
| ENTPD1    | -0,306379 | -0,154923 | <b>-0,230651</b>  | 1512 | 2187 | <b>1849,5</b> |
| TMEM192   | -0,53767  | 0,076617  | <b>-0,2305265</b> | 1222 | 1481 | <b>1351,5</b> |
| STK3      | -0,784469 | 0,323561  | <b>-0,230454</b>  | 1625 | 1764 | <b>1694,5</b> |
| STAP1     | -0,388719 | -0,071993 | <b>-0,230356</b>  | 1654 | 2528 | <b>2091</b>   |
| PSTK      | -0,327522 | -0,133155 | <b>-0,2303385</b> | 1568 | 1917 | <b>1742,5</b> |
| UPF2      | -0,229771 | NaN       | <b>-0,229771</b>  | 1734 | NaN  | <b>1734</b>   |

|           |           |           |                   |      |      |               |
|-----------|-----------|-----------|-------------------|------|------|---------------|
| C3P1      | -0,805643 | 0,34648   | <b>-0,2295815</b> | 1577 | 2003 | <b>1790</b>   |
| PHF17     | -0,986706 | 0,527666  | <b>-0,22952</b>   | 1418 | 2782 | <b>2100</b>   |
| MBNL2     | -0,33743  | -0,121482 | <b>-0,229456</b>  | 1563 | 1862 | <b>1712,5</b> |
| COL6A3    | -0,96632  | 0,507736  | <b>-0,229292</b>  | 1339 | 1928 | <b>1633,5</b> |
| SGK223    | 0,043123  | -0,501266 | <b>-0,2290715</b> | 1675 | 2270 | <b>1972,5</b> |
| SGK196    | 0,099794  | -0,557551 | <b>-0,2288785</b> | 2049 | 2077 | <b>2063</b>   |
| ZNF22     | -0,228841 | NaN       | <b>-0,228841</b>  | 1977 | NaN  | <b>1977</b>   |
| AZGP1     | -0,237924 | -0,219744 | <b>-0,228834</b>  | 1438 | 1762 | <b>1600</b>   |
| RAB40B    | 0,110999  | -0,568581 | <b>-0,228791</b>  | 1730 | 2667 | <b>2198,5</b> |
| CST2      | -0,519761 | 0,063342  | <b>-0,2282095</b> | 744  | 1162 | <b>953</b>    |
| FAM5C     | -0,038734 | -0,417505 | <b>-0,2281195</b> | 1691 | 1671 | <b>1681</b>   |
| GPLD1     | -0,023447 | -0,432358 | <b>-0,2279025</b> | 1834 | 3107 | <b>2470,5</b> |
| MRPS35    | -0,333057 | -0,122559 | <b>-0,227808</b>  | 2169 | 2515 | <b>2342</b>   |
| L3MBTL3   | -0,468657 | 0,013109  | <b>-0,227774</b>  | 1719 | 1846 | <b>1782,5</b> |
| CA3       | -0,575887 | 0,120554  | <b>-0,2276665</b> | 1253 | 2260 | <b>1756,5</b> |
| SF1       | -0,227618 | NaN       | <b>-0,227618</b>  | 2060 | NaN  | <b>2060</b>   |
| DIAPH2    | -0,368974 | -0,086056 | <b>-0,227515</b>  | 1410 | 2191 | <b>1800,5</b> |
| CNTN6     | -0,075716 | -0,378637 | <b>-0,2271765</b> | 1895 | 2346 | <b>2120,5</b> |
| AK7       | -0,035446 | -0,418057 | <b>-0,2267515</b> | 1674 | 2261 | <b>1967,5</b> |
| PLVAP     | -0,768592 | 0,315189  | <b>-0,2267015</b> | 1731 | 1876 | <b>1803,5</b> |
| NOX3      | NaN       | -0,226617 | <b>-0,226617</b>  | NaN  | 2478 | <b>2478</b>   |
| ATP1A4    | -0,020369 | -0,431948 | <b>-0,2261585</b> | 1785 | 2231 | <b>2008</b>   |
| MAP1LC3A  | -0,453786 | 0,001615  | <b>-0,2260855</b> | 1574 | 1514 | <b>1544</b>   |
| LMNB2     | 0,316295  | -0,767313 | <b>-0,225509</b>  | 1918 | 2252 | <b>2085</b>   |
| IL18      | 0,966969  | -1,417872 | <b>-0,2254515</b> | 1403 | 1436 | <b>1419,5</b> |
| DUOX1     | -0,420325 | -0,030201 | <b>-0,225263</b>  | 1281 | 2176 | <b>1728,5</b> |
| ZNF704    | 0,239721  | -0,690204 | <b>-0,2252415</b> | 2017 | 2380 | <b>2198,5</b> |
| LACC1     | -0,225138 | NaN       | <b>-0,225138</b>  | 2369 | NaN  | <b>2369</b>   |
| CHRNA10   | 0,444768  | -0,895014 | <b>-0,225123</b>  | 1935 | 2204 | <b>2069,5</b> |
| HNF1A     | -0,054494 | -0,395632 | <b>-0,225063</b>  | 1794 | 1786 | <b>1790</b>   |
| C14orf182 | -0,696632 | 0,246732  | <b>-0,22495</b>   | 1859 | 2222 | <b>2040,5</b> |
| NPTXR     | -0,866679 | 0,417104  | <b>-0,2247875</b> | 1754 | 2137 | <b>1945,5</b> |
| ERCC3     | -0,359604 | -0,089589 | <b>-0,2245965</b> | 1555 | 1775 | <b>1665</b>   |
| HDAC11    | -0,130622 | -0,31812  | <b>-0,224371</b>  | 1808 | 1957 | <b>1882,5</b> |

|          |           |           |                   |      |      |               |
|----------|-----------|-----------|-------------------|------|------|---------------|
| TMEM161A | 0,172046  | -0,620648 | <b>-0,224301</b>  | 1644 | 1988 | <b>1816</b>   |
| GJA8     | NaN       | -0,224203 | <b>-0,224203</b>  | NaN  | 2326 | <b>2326</b>   |
| HDAC7    | -0,313612 | -0,134559 | <b>-0,2240855</b> | 1043 | 1742 | <b>1392,5</b> |
| COQ10B   | 0,369583  | -0,817704 | <b>-0,2240605</b> | 1441 | 2892 | <b>2166,5</b> |
| TSPO     | -0,103519 | -0,344335 | <b>-0,223927</b>  | 2117 | 2364 | <b>2240,5</b> |
| SRP19    | 0,479544  | -0,92719  | <b>-0,223823</b>  | 1623 | 2712 | <b>2167,5</b> |
| DNAJA3   | -0,377416 | -0,070172 | <b>-0,223794</b>  | 1966 | 2230 | <b>2098</b>   |
| RAB17    | -0,184765 | -0,262624 | <b>-0,2236945</b> | 1282 | 1760 | <b>1521</b>   |
| SOX14    | 0,140289  | -0,587618 | <b>-0,2236645</b> | 1389 | 2340 | <b>1864,5</b> |
| GABPB2   | 0,042871  | -0,489411 | <b>-0,22327</b>   | 2060 | 1109 | <b>1584,5</b> |
| C1orf187 | -0,222833 | NaN       | <b>-0,222833</b>  | 1507 | NaN  | <b>1507</b>   |
| IL17RE   | -0,29625  | -0,149345 | <b>-0,2227975</b> | 1424 | 2304 | <b>1864</b>   |
| FAM161A  | -0,385582 | -0,059731 | <b>-0,2226565</b> | 870  | 1324 | <b>1097</b>   |
| M6PR     | 0,134318  | -0,579611 | <b>-0,2226465</b> | 2254 | 2066 | <b>2160</b>   |
| CAMTA2   | -0,558043 | 0,113373  | <b>-0,222335</b>  | 1497 | 2234 | <b>1865,5</b> |
| TGFBRAP1 | -0,568505 | 0,124313  | <b>-0,222096</b>  | 1623 | 2358 | <b>1990,5</b> |
| TNFAIP8  | 0,125729  | -0,569836 | <b>-0,2220535</b> | 1246 | 2088 | <b>1667</b>   |
| AKNA     | 0,214781  | -0,658013 | <b>-0,221616</b>  | 1669 | 1932 | <b>1800,5</b> |
| CDH6     | -0,221592 | -0,221531 | <b>-0,2215615</b> | 1741 | 2318 | <b>2029,5</b> |
| FAM53A   | -0,839192 | 0,396243  | <b>-0,2214745</b> | 1289 | 2087 | <b>1688</b>   |
| RAB15    | -0,617724 | 0,175073  | <b>-0,2213255</b> | 1447 | 1285 | <b>1366</b>   |
| PARK7    | -0,448368 | 0,005782  | <b>-0,221293</b>  | 2103 | 2606 | <b>2354,5</b> |
| CPLX3    | -0,221149 | NaN       | <b>-0,221149</b>  | 1355 | NaN  | <b>1355</b>   |
| KCNMB2   | -0,162456 | -0,279757 | <b>-0,2211065</b> | 1630 | 2301 | <b>1965,5</b> |
| RASL10B  | 0,569238  | -1,011173 | <b>-0,2209675</b> | 1269 | 1980 | <b>1624,5</b> |
| POSTN    | -1,060172 | 0,618588  | <b>-0,220792</b>  | 1003 | 1657 | <b>1330</b>   |
| FKBP2    | -0,574587 | 0,133438  | <b>-0,2205745</b> | 2056 | 2218 | <b>2137</b>   |
| CSRP2BP  | -0,209476 | -0,231549 | <b>-0,2205125</b> | 1475 | 1982 | <b>1728,5</b> |
| CDKL4    | -0,305235 | -0,135427 | <b>-0,220331</b>  | 1758 | 1502 | <b>1630</b>   |
| HS3ST1   | NaN       | -0,21973  | <b>-0,21973</b>   | NaN  | 2654 | <b>2654</b>   |
| PIM2     | -0,253554 | -0,185809 | <b>-0,2196815</b> | 1828 | 1897 | <b>1862,5</b> |
| PDCD1LG2 | 0,134515  | -0,57358  | <b>-0,2195325</b> | 1561 | 2453 | <b>2007</b>   |
| IFNA7    | -0,196148 | -0,242655 | <b>-0,2194015</b> | 1649 | 1450 | <b>1549,5</b> |
| GMFB     | 0,105933  | -0,544711 | <b>-0,219389</b>  | 1810 | 2426 | <b>2118</b>   |

|         |           |           |                   |      |      |               |
|---------|-----------|-----------|-------------------|------|------|---------------|
| SLC16A1 | -0,435322 | -0,003443 | <b>-0,2193825</b> | 1382 | 1545 | <b>1463,5</b> |
| TAPBP1  | 0,192611  | -0,631062 | <b>-0,2192255</b> | 944  | 1455 | <b>1199,5</b> |
| HPS4    | -1,091529 | 0,653125  | <b>-0,219202</b>  | 1251 | 1991 | <b>1621</b>   |
| TLE2    | -0,517062 | 0,079069  | <b>-0,2189965</b> | 1410 | 2447 | <b>1928,5</b> |
| HSD17B2 | -0,186546 | -0,251205 | <b>-0,2188755</b> | 1672 | 1729 | <b>1700,5</b> |
| ING5    | -0,861552 | 0,423918  | <b>-0,218817</b>  | 1095 | 1706 | <b>1400,5</b> |
| GZF1    | -0,479445 | 0,04229   | <b>-0,2185775</b> | 1241 | 1699 | <b>1470</b>   |
| NGLY1   | 0,922443  | -1,359529 | <b>-0,218543</b>  | 1445 | 1813 | <b>1629</b>   |
| LRRC61  | -0,218505 | NaN       | <b>-0,218505</b>  | 1514 | NaN  | <b>1514</b>   |
| KCNMB3  | -0,351179 | -0,085822 | <b>-0,2185005</b> | 2007 | 2964 | <b>2485,5</b> |
| SASS6   | -0,603601 | 0,166873  | <b>-0,218364</b>  | 1517 | 2400 | <b>1958,5</b> |
| TUBB2A  | -0,35648  | -0,080187 | <b>-0,2183335</b> | 1546 | 2011 | <b>1778,5</b> |
| ADH1B   | -0,57506  | 0,138446  | <b>-0,218307</b>  | 1867 | 2000 | <b>1933,5</b> |
| CCNI    | 0,322837  | -0,759241 | <b>-0,218202</b>  | 1644 | 1976 | <b>1810</b>   |
| TEX261  | -0,218179 | NaN       | <b>-0,218179</b>  | 1933 | NaN  | <b>1933</b>   |
| MAEA    | 0,011539  | -0,447241 | <b>-0,217851</b>  | 1963 | 2037 | <b>2000</b>   |
| DOK1    | -0,21761  | NaN       | <b>-0,21761</b>   | 1416 | NaN  | <b>1416</b>   |
| GDAP1L1 | 0,203007  | -0,636704 | <b>-0,2168485</b> | 1393 | 1740 | <b>1566,5</b> |
| LRBA    | 0,129999  | -0,563628 | <b>-0,2168145</b> | 1954 | 2223 | <b>2088,5</b> |
| ZNF187  | 0,310014  | -0,743615 | <b>-0,2168005</b> | 1835 | 2219 | <b>2027</b>   |
| MARS2   | -0,556336 | 0,123106  | <b>-0,216615</b>  | 1735 | 2080 | <b>1907,5</b> |
| CEBPG   | 0,325142  | -0,758234 | <b>-0,216546</b>  | 1778 | 2490 | <b>2134</b>   |
| ANO6    | -0,216508 | NaN       | <b>-0,216508</b>  | 1754 | NaN  | <b>1754</b>   |
| ELP4    | -0,196029 | -0,235173 | <b>-0,215601</b>  | 1493 | 2262 | <b>1877,5</b> |
| GPR50   | -0,215316 | NaN       | <b>-0,215316</b>  | 1332 | NaN  | <b>1332</b>   |
| CCDC60  | -0,173758 | -0,25666  | <b>-0,215209</b>  | 1337 | 2069 | <b>1703</b>   |
| APEH    | -1,290264 | 0,860283  | <b>-0,2149905</b> | 1845 | 2110 | <b>1977,5</b> |
| FST     | -0,191968 | -0,237787 | <b>-0,2148775</b> | 1697 | 3013 | <b>2355</b>   |
| OR2T11  | -0,372809 | -0,056819 | <b>-0,214814</b>  | 2014 | 2432 | <b>2223</b>   |
| PDE6G   | 0,167444  | -0,596785 | <b>-0,2146705</b> | 1933 | 2449 | <b>2191</b>   |
| TMEM62  | 0,016809  | -0,445971 | <b>-0,214581</b>  | 1559 | 1275 | <b>1417</b>   |
| RCC2    | -0,214462 | NaN       | <b>-0,214462</b>  | 1291 | NaN  | <b>1291</b>   |
| RNF133  | -0,464297 | 0,03586   | <b>-0,2142185</b> | 1634 | 2264 | <b>1949</b>   |
| GPRC6A  | -0,094087 | -0,333852 | <b>-0,2139695</b> | 1709 | 1805 | <b>1757</b>   |

|          |           |           |                   |      |      |               |
|----------|-----------|-----------|-------------------|------|------|---------------|
| METAP1D  | -0,19475  | -0,232973 | <b>-0,2138615</b> | 2033 | 2087 | <b>2060</b>   |
| C2orf53  | -0,333234 | -0,094189 | <b>-0,2137115</b> | 1436 | 2122 | <b>1779</b>   |
| CCL18    | -0,121389 | -0,305498 | <b>-0,2134435</b> | 1859 | 2501 | <b>2180</b>   |
| FAM180A  | -0,213317 | NaN       | <b>-0,213317</b>  | 1542 | NaN  | <b>1542</b>   |
| DPYSL5   | 0,150065  | -0,57616  | <b>-0,2130475</b> | 1965 | 2246 | <b>2105,5</b> |
| OGDHL    | NaN       | -0,212908 | <b>-0,212908</b>  | NaN  | 2554 | <b>2554</b>   |
| PITX2    | 0,177572  | -0,60291  | <b>-0,212669</b>  | 1069 | 1736 | <b>1402,5</b> |
| MIOX     | 0,10901   | -0,534118 | <b>-0,212554</b>  | 748  | 828  | <b>788</b>    |
| CHTOP    | -0,212517 | NaN       | <b>-0,212517</b>  | 1595 | NaN  | <b>1595</b>   |
| DEPDC4   | -0,842452 | 0,41753   | <b>-0,212461</b>  | 1691 | 2383 | <b>2037</b>   |
| WDR45    | 0,662257  | -1,087098 | <b>-0,2124205</b> | 1286 | 1647 | <b>1466,5</b> |
| DDX56    | -0,44647  | 0,022095  | <b>-0,2121875</b> | 1593 | 2030 | <b>1811,5</b> |
| HAX1     | 0,055259  | -0,478946 | <b>-0,2118435</b> | 2050 | 2086 | <b>2068</b>   |
| RSU1     | -0,162931 | -0,260632 | <b>-0,2117815</b> | 1654 | 1744 | <b>1699</b>   |
| UBQLNL   | 0,273408  | -0,696879 | <b>-0,2117355</b> | 1536 | 2123 | <b>1829,5</b> |
| C1orf129 | 0,621025  | -1,044045 | <b>-0,21151</b>   | 1703 | 2653 | <b>2178</b>   |
| ZNF90    | -0,072283 | -0,350676 | <b>-0,2114795</b> | 2245 | 2717 | <b>2481</b>   |
| UHRF1BP1 | 0,01186   | -0,43429  | <b>-0,211215</b>  | 1487 | 1980 | <b>1733,5</b> |
| AIFM2    | -0,09266  | -0,329069 | <b>-0,2108645</b> | 1784 | 2362 | <b>2073</b>   |
| ZKSCAN4  | 0,474098  | -0,895815 | <b>-0,2108585</b> | 1838 | 2107 | <b>1972,5</b> |
| C3orf18  | -0,210838 | NaN       | <b>-0,210838</b>  | 1672 | NaN  | <b>1672</b>   |
| HIF1A    | NaN       | -0,21072  | <b>-0,21072</b>   | NaN  | 2753 | <b>2753</b>   |
| KRT20    | -0,439124 | 0,018411  | <b>-0,2103565</b> | 1657 | 2352 | <b>2004,5</b> |
| ZNRF2    | 0,116233  | -0,536596 | <b>-0,2101815</b> | 2041 | 3098 | <b>2569,5</b> |
| FAM114A2 | -0,703995 | 0,284166  | <b>-0,2099145</b> | 1627 | 1905 | <b>1766</b>   |
| HENMT1   | -0,209716 | NaN       | <b>-0,209716</b>  | 1903 | NaN  | <b>1903</b>   |
| DPYSL4   | -0,284409 | -0,13371  | <b>-0,2090595</b> | 1424 | 1896 | <b>1660</b>   |
| DHX36    | 0,212034  | -0,630121 | <b>-0,2090435</b> | 1740 | 1677 | <b>1708,5</b> |
| CLPS     | -1,381708 | 0,963946  | <b>-0,208881</b>  | 1764 | 2262 | <b>2013</b>   |
| ATRN     | 0,398253  | -0,815941 | <b>-0,208844</b>  | 1942 | 2338 | <b>2140</b>   |
| GAN      | -0,208323 | NaN       | <b>-0,208323</b>  | 1325 | NaN  | <b>1325</b>   |
| RABIF    | 0,047139  | -0,463129 | <b>-0,207995</b>  | 1574 | 1620 | <b>1597</b>   |
| GJB4     | 0,209814  | -0,625428 | <b>-0,207807</b>  | 1431 | 2174 | <b>1802,5</b> |
| C14orf21 | -0,207457 | NaN       | <b>-0,207457</b>  | 1860 | NaN  | <b>1860</b>   |

|           |           |           |                   |      |      |               |
|-----------|-----------|-----------|-------------------|------|------|---------------|
| SOCS6     | -0,535782 | 0,120871  | <b>-0,2074555</b> | 1566 | 2918 | <b>2242</b>   |
| DHPS      | 0,208675  | -0,623459 | <b>-0,207392</b>  | 1597 | 1967 | <b>1782</b>   |
| MFSD8     | 0,030229  | -0,444699 | <b>-0,207235</b>  | 1631 | 2153 | <b>1892</b>   |
| CHMP7     | 0,222024  | -0,636366 | <b>-0,207171</b>  | 2043 | 2775 | <b>2409</b>   |
| MMACHC    | -0,206962 | NaN       | <b>-0,206962</b>  | 1972 | NaN  | <b>1972</b>   |
| TAS2R16   | -1,095932 | 0,682067  | <b>-0,2069325</b> | 1443 | 1887 | <b>1665</b>   |
| ZNF697    | -0,268961 | -0,144685 | <b>-0,206823</b>  | 1478 | 2176 | <b>1827</b>   |
| WDR5B     | -0,972074 | 0,558595  | <b>-0,2067395</b> | 1335 | 1817 | <b>1576</b>   |
| KLHL6     | -0,37762  | -0,035769 | <b>-0,2066945</b> | 1955 | 1745 | <b>1850</b>   |
| SEPW1     | -1,642386 | 1,22936   | <b>-0,206513</b>  | 1811 | 1680 | <b>1745,5</b> |
| C14orf102 | -0,287154 | -0,125822 | <b>-0,206488</b>  | 1627 | 2053 | <b>1840</b>   |
| PGK2      | -0,846567 | 0,433612  | <b>-0,2064775</b> | 2281 | 1459 | <b>1870</b>   |
| TSC22D4   | -0,206373 | NaN       | <b>-0,206373</b>  | 2044 | NaN  | <b>2044</b>   |
| STXBP3    | -0,206265 | NaN       | <b>-0,206265</b>  | 1930 | NaN  | <b>1930</b>   |
| MYBL2     | 0,85969   | -1,271986 | <b>-0,206148</b>  | 841  | 1706 | <b>1273,5</b> |
| OXGR1     | -0,205925 | NaN       | <b>-0,205925</b>  | 1369 | NaN  | <b>1369</b>   |
| YES1      | 0,339528  | -0,751025 | <b>-0,2057485</b> | 1694 | 1732 | <b>1713</b>   |
| CCNT1     | 0,183791  | -0,59526  | <b>-0,2057345</b> | 1756 | 2244 | <b>2000</b>   |
| ASB2      | -0,308422 | -0,102968 | <b>-0,205695</b>  | 1499 | 2225 | <b>1862</b>   |
| ZNF568    | 0,298662  | -0,710027 | <b>-0,2056825</b> | 1360 | 1261 | <b>1310,5</b> |
| PLA2G3    | 0,285754  | -0,695815 | <b>-0,2050305</b> | 1843 | 2707 | <b>2275</b>   |
| ZNF284    | -0,204795 | NaN       | <b>-0,204795</b>  | 2006 | NaN  | <b>2006</b>   |
| E2F5      | 0,38748   | -0,796598 | <b>-0,204559</b>  | 1254 | 2286 | <b>1770</b>   |
| SSRP1     | -0,499686 | 0,090829  | <b>-0,2044285</b> | 1633 | 1650 | <b>1641,5</b> |
| SNN       | -0,422101 | 0,013268  | <b>-0,2044165</b> | 2050 | 2609 | <b>2329,5</b> |
| PPP2R1B   | -0,567425 | 0,158895  | <b>-0,204265</b>  | 1301 | 1915 | <b>1608</b>   |
| USP54     | -0,456259 | 0,047777  | <b>-0,204241</b>  | 1904 | 1755 | <b>1829,5</b> |
| RNPEP     | 0,019671  | -0,428144 | <b>-0,2042365</b> | 1480 | 2132 | <b>1806</b>   |
| RYR1      | -0,065501 | -0,342833 | <b>-0,204167</b>  | 2400 | 3063 | <b>2731,5</b> |
| FAM65A    | -0,204035 | NaN       | <b>-0,204035</b>  | 1847 | NaN  | <b>1847</b>   |
| CD177     | -0,203704 | NaN       | <b>-0,203704</b>  | 1852 | NaN  | <b>1852</b>   |
| IL37      | -0,149956 | -0,25744  | <b>-0,203698</b>  | 1827 | 1842 | <b>1834,5</b> |
| GALNTL5   | NaN       | -0,203598 | <b>-0,203598</b>  | NaN  | 3041 | <b>3041</b>   |
| PHYHIP    | -0,033701 | -0,373227 | <b>-0,203464</b>  | 1203 | 2071 | <b>1637</b>   |



|         |           |           |                   |      |      |               |
|---------|-----------|-----------|-------------------|------|------|---------------|
| PSMD13  | -0,203376 | NaN       | <b>-0,203376</b>  | 1080 | NaN  | <b>1080</b>   |
| OR6Q1   | 0,738261  | -1,144297 | <b>-0,203018</b>  | 1761 | 2089 | <b>1925</b>   |
| ATP2B1  | 0,077977  | -0,483736 | <b>-0,2028795</b> | 1336 | 1914 | <b>1625</b>   |
| OAZ3    | -0,639367 | 0,233611  | <b>-0,202878</b>  | 1353 | 1686 | <b>1519,5</b> |
| PRRG4   | -0,573226 | 0,167481  | <b>-0,2028725</b> | 699  | 2066 | <b>1382,5</b> |
| RNF25   | 0,435978  | -0,841715 | <b>-0,2028685</b> | 1147 | 2324 | <b>1735,5</b> |
| PLAC8L1 | 0,327694  | -0,733325 | <b>-0,2028155</b> | 1867 | 2176 | <b>2021,5</b> |
| GATA2   | 0,419357  | -0,824937 | <b>-0,20279</b>   | 1293 | 1730 | <b>1511,5</b> |
| SFRP4   | -0,229511 | -0,175812 | <b>-0,2026615</b> | 1182 | 2443 | <b>1812,5</b> |
| ABLIM3  | 0,066542  | -0,471722 | <b>-0,20259</b>   | 1664 | 2452 | <b>2058</b>   |
| MED16   | -0,193733 | -0,210271 | <b>-0,202002</b>  | 986  | 1189 | <b>1087,5</b> |
| TMEM234 | -0,20192  | NaN       | <b>-0,20192</b>   | 1765 | NaN  | <b>1765</b>   |
| CITED2  | -0,347172 | -0,056483 | <b>-0,2018275</b> | 1525 | 2183 | <b>1854</b>   |
| BEND4   | -0,201816 | NaN       | <b>-0,201816</b>  | 1596 | NaN  | <b>1596</b>   |
| DROSHA  | -0,164119 | -0,239469 | <b>-0,201794</b>  | 1795 | 2409 | <b>2102</b>   |
| TNNT1   | 0,017092  | -0,420568 | <b>-0,201738</b>  | 1434 | 1785 | <b>1609,5</b> |
| OR51G1  | -0,336377 | -0,06668  | <b>-0,2015285</b> | 1847 | 2231 | <b>2039</b>   |
| IGFL1   | -0,201512 | NaN       | <b>-0,201512</b>  | 1825 | NaN  | <b>1825</b>   |
| PHTF1   | -0,515823 | 0,113222  | <b>-0,2013005</b> | 1490 | 2164 | <b>1827</b>   |
| OR7A17  | -0,375121 | -0,027406 | <b>-0,2012635</b> | 1974 | 1784 | <b>1879</b>   |
| GEMIN8  | -0,260132 | -0,142183 | <b>-0,2011575</b> | 1582 | 2585 | <b>2083,5</b> |
| NTAN1   | -0,215978 | -0,186146 | <b>-0,201062</b>  | 1822 | 2421 | <b>2121,5</b> |
| STMN1   | -0,270097 | -0,131912 | <b>-0,2010045</b> | 1237 | 1470 | <b>1353,5</b> |
| RP1L1   | 0,216547  | -0,618299 | <b>-0,200876</b>  | 1266 | 1914 | <b>1590</b>   |
| TXNDC15 | 0,10695   | -0,508581 | <b>-0,2008155</b> | 1687 | 2426 | <b>2056,5</b> |
| C4orf41 | -0,200664 | NaN       | <b>-0,200664</b>  | 1606 | NaN  | <b>1606</b>   |
| ZNF460  | -0,200583 | NaN       | <b>-0,200583</b>  | 1845 | NaN  | <b>1845</b>   |
| HES3    | -1,453665 | 1,052937  | <b>-0,200364</b>  | 1427 | 2410 | <b>1918,5</b> |
| TMEM147 | -0,586296 | 0,185584  | <b>-0,200356</b>  | 1551 | 1900 | <b>1725,5</b> |
| DHCR24  | -0,497683 | 0,097102  | <b>-0,2002905</b> | 1309 | 2397 | <b>1853</b>   |
| CD163   | -0,284828 | -0,115323 | <b>-0,2000755</b> | 1808 | 2242 | <b>2025</b>   |
| GGCX    | -0,730593 | 0,331405  | <b>-0,199594</b>  | 1921 | 2460 | <b>2190,5</b> |
| ZC3H10  | 0,216684  | -0,61557  | <b>-0,199443</b>  | 1705 | 1670 | <b>1687,5</b> |
| ZNF501  | -0,132123 | -0,266302 | <b>-0,1992125</b> | 1265 | 1293 | <b>1279</b>   |

|           |           |           |                   |      |      |               |
|-----------|-----------|-----------|-------------------|------|------|---------------|
| MAP3K6    | -0,20102  | -0,197012 | <b>-0,199016</b>  | 1020 | 2270 | <b>1645</b>   |
| ZNF207    | 0,3501    | -0,748093 | <b>-0,1989965</b> | 1540 | 1778 | <b>1659</b>   |
| RAB11FIP5 | -0,122789 | -0,275114 | <b>-0,1989515</b> | 1374 | 1837 | <b>1605,5</b> |
| MIB2      | 0,167721  | -0,565523 | <b>-0,198901</b>  | 1410 | 2005 | <b>1707,5</b> |
| ADAMTSL1  | -0,220716 | -0,175741 | <b>-0,1982285</b> | 1432 | 2200 | <b>1816</b>   |
| CYB561D2  | 0,050522  | -0,446978 | <b>-0,198228</b>  | 1386 | 2064 | <b>1725</b>   |
| HPN       | -0,202214 | -0,194225 | <b>-0,1982195</b> | 1279 | 1970 | <b>1624,5</b> |
| RUVBL1    | -0,335683 | -0,060565 | <b>-0,198124</b>  | 1479 | 2388 | <b>1933,5</b> |
| BNC1      | -0,139547 | -0,256457 | <b>-0,198002</b>  | 1829 | 2166 | <b>1997,5</b> |
| YTHDF3    | 0,308773  | -0,704729 | <b>-0,197978</b>  | 1805 | 2256 | <b>2030,5</b> |
| SPINK2    | -0,156405 | -0,239439 | <b>-0,197922</b>  | 1657 | 2189 | <b>1923</b>   |
| GNPDA2    | -0,126764 | -0,26901  | <b>-0,197887</b>  | 2287 | 2158 | <b>2222,5</b> |
| MED9      | 0,115171  | -0,510931 | <b>-0,19788</b>   | 1772 | 1995 | <b>1883,5</b> |
| LBX1      | NaN       | -0,197697 | <b>-0,197697</b>  | NaN  | 2549 | <b>2549</b>   |
| PRR21     | -0,492111 | 0,097519  | <b>-0,197296</b>  | 1472 | 1805 | <b>1638,5</b> |
| ZNF385B   | 0,037467  | -0,431715 | <b>-0,197124</b>  | 1087 | 1762 | <b>1424,5</b> |
| CTBS      | -0,63934  | 0,245098  | <b>-0,197121</b>  | 1633 | 2130 | <b>1881,5</b> |
| REG3A     | NaN       | -0,197017 | <b>-0,197017</b>  | NaN  | 2253 | <b>2253</b>   |
| C11orf45  | -0,1969   | NaN       | <b>-0,1969</b>    | 1518 | NaN  | <b>1518</b>   |
| TMEM99    | -1,665531 | 1,271892  | <b>-0,1968195</b> | 1943 | 1731 | <b>1837</b>   |
| NR3C1     | 0,091329  | -0,484701 | <b>-0,196686</b>  | 1226 | 1678 | <b>1452</b>   |
| ZNF624    | -0,387968 | -0,00499  | <b>-0,196479</b>  | 1719 | 1842 | <b>1780,5</b> |
| IAH1      | 0,139532  | -0,532397 | <b>-0,1964325</b> | 1744 | 1548 | <b>1646</b>   |
| FAM118A   | -0,034315 | -0,358508 | <b>-0,1964115</b> | 1638 | 2130 | <b>1884</b>   |
| BLK       | 0,123132  | -0,515839 | <b>-0,1963535</b> | 1900 | 2026 | <b>1963</b>   |
| CDC34     | 0,149752  | -0,542254 | <b>-0,196251</b>  | 1785 | 2894 | <b>2339,5</b> |
| MGMT      | -0,378851 | -0,013601 | <b>-0,196226</b>  | 1548 | 1835 | <b>1691,5</b> |
| ELP3      | NaN       | -0,196199 | <b>-0,196199</b>  | NaN  | 2794 | <b>2794</b>   |
| PFN1      | 0,886599  | -1,278391 | <b>-0,195896</b>  | 1878 | 1894 | <b>1886</b>   |
| PRDM12    | -0,20375  | -0,188007 | <b>-0,1958785</b> | 1352 | 1974 | <b>1663</b>   |
| SIRT7     | NaN       | -0,195811 | <b>-0,195811</b>  | NaN  | 2744 | <b>2744</b>   |
| C3        | 0,028068  | -0,419303 | <b>-0,1956175</b> | 2018 | 1802 | <b>1910</b>   |
| CRYGA     | 0,098635  | -0,489798 | <b>-0,1955815</b> | 1448 | 1780 | <b>1614</b>   |
| C7orf31   | -1,094467 | 0,703606  | <b>-0,1954305</b> | 1930 | 2702 | <b>2316</b>   |

|          |           |           |                   |      |      |               |
|----------|-----------|-----------|-------------------|------|------|---------------|
| ISM2     | -0,665266 | 0,274558  | <b>-0,195354</b>  | 1742 | 2252 | <b>1997</b>   |
| DMAP1    | -0,223827 | -0,166727 | <b>-0,195277</b>  | 1083 | 1508 | <b>1295,5</b> |
| LACRT    | -0,039466 | -0,351016 | <b>-0,195241</b>  | 2192 | 3084 | <b>2638</b>   |
| CCDC41   | -0,195166 | NaN       | <b>-0,195166</b>  | 1452 | NaN  | <b>1452</b>   |
| RXRA     | -0,083091 | -0,306943 | <b>-0,195017</b>  | 1185 | 1518 | <b>1351,5</b> |
| GRIK5    | -0,097069 | -0,292926 | <b>-0,1949975</b> | 1829 | 2395 | <b>2112</b>   |
| CHRNA3   | -0,771077 | 0,3812    | <b>-0,1949385</b> | 1724 | 2301 | <b>2012,5</b> |
| APP      | 0,91394   | -1,303677 | <b>-0,1948685</b> | 1562 | 1447 | <b>1504,5</b> |
| RNF24    | -0,614147 | 0,22458   | <b>-0,1947835</b> | 1677 | 2308 | <b>1992,5</b> |
| LPL      | 0,060693  | -0,450197 | <b>-0,194752</b>  | 1593 | 2820 | <b>2206,5</b> |
| CHRNB3   | -0,131721 | -0,257464 | <b>-0,1945925</b> | 2026 | 2823 | <b>2424,5</b> |
| HCRT     | -0,148938 | -0,239602 | <b>-0,19427</b>   | 1499 | 1701 | <b>1600</b>   |
| KRT76    | -0,194251 | NaN       | <b>-0,194251</b>  | 1643 | NaN  | <b>1643</b>   |
| NR4A1    | -0,323019 | -0,065238 | <b>-0,1941285</b> | 1712 | 2447 | <b>2079,5</b> |
| NLRP4    | -0,194122 | NaN       | <b>-0,194122</b>  | 1970 | NaN  | <b>1970</b>   |
| SLC25A37 | 0,277187  | -0,665355 | <b>-0,194084</b>  | 1579 | 1976 | <b>1777,5</b> |
| POLR2L   | -0,285005 | -0,102889 | <b>-0,193947</b>  | 1602 | 1893 | <b>1747,5</b> |
| MAN2A2   | -0,203271 | -0,184483 | <b>-0,193877</b>  | 1333 | 1576 | <b>1454,5</b> |
| HK3      | 0,00412   | -0,391734 | <b>-0,193807</b>  | 2105 | 2312 | <b>2208,5</b> |
| BZRAP1   | -0,281135 | -0,106343 | <b>-0,193739</b>  | 2007 | 2545 | <b>2276</b>   |
| LYG2     | 0,114972  | -0,502049 | <b>-0,1935385</b> | 1366 | 2553 | <b>1959,5</b> |
| MCOLN1   | -0,341179 | -0,045392 | <b>-0,1932855</b> | 1671 | 2338 | <b>2004,5</b> |
| SCN2A    | -0,299197 | -0,086428 | <b>-0,1928125</b> | 1640 | 3211 | <b>2425,5</b> |
| ATP5G1   | 0,776378  | -1,161961 | <b>-0,1927915</b> | 1479 | 1804 | <b>1641,5</b> |
| OR2Z1    | -0,081405 | -0,304098 | <b>-0,1927515</b> | 1902 | 2848 | <b>2375</b>   |
| DPM2     | -0,252053 | -0,132846 | <b>-0,1924495</b> | 2064 | 2244 | <b>2154</b>   |
| SPINK14  | -0,213415 | -0,171277 | <b>-0,192346</b>  | 1166 | 1578 | <b>1372</b>   |
| VKORC1   | -0,78006  | 0,395904  | <b>-0,192078</b>  | 1296 | 1623 | <b>1459,5</b> |
| FGB      | 0,128296  | -0,511808 | <b>-0,191756</b>  | 1624 | 2121 | <b>1872,5</b> |
| SLC17A8  | NaN       | -0,191689 | <b>-0,191689</b>  | NaN  | 2855 | <b>2855</b>   |
| ZNF615   | -0,191597 | NaN       | <b>-0,191597</b>  | 715  | NaN  | <b>715</b>    |
| NOTCH3   | -0,700745 | 0,317578  | <b>-0,1915835</b> | 1518 | 2128 | <b>1823</b>   |
| RBPJ     | -0,438513 | 0,055359  | <b>-0,191577</b>  | 1795 | 2302 | <b>2048,5</b> |
| FAM40A   | -0,237555 | -0,144453 | <b>-0,191004</b>  | 1911 | 1862 | <b>1886,5</b> |

|          |           |           |                   |      |      |               |
|----------|-----------|-----------|-------------------|------|------|---------------|
| ARHGAP22 | -0,146114 | -0,235553 | <b>-0,1908335</b> | 1543 | 1210 | <b>1376,5</b> |
| EFEMP2   | 1,39492   | -1,776513 | <b>-0,1907965</b> | 1226 | 1627 | <b>1426,5</b> |
| SERPIND1 | -0,653518 | 0,271989  | <b>-0,1907645</b> | 1693 | 2123 | <b>1908</b>   |
| C8orf58  | 0,203971  | -0,585356 | <b>-0,1906925</b> | 1320 | 2330 | <b>1825</b>   |
| C9orf78  | 0,066545  | -0,447867 | <b>-0,190661</b>  | 1385 | 2711 | <b>2048</b>   |
| TMPRSS5  | 0,737971  | -1,119289 | <b>-0,190659</b>  | 1543 | 1844 | <b>1693,5</b> |
| CDK5RAP2 | -0,084045 | -0,297136 | <b>-0,1905905</b> | 1630 | 1902 | <b>1766</b>   |
| ALPK3    | -0,599934 | 0,218951  | <b>-0,1904915</b> | 1069 | 1549 | <b>1309</b>   |
| GLTPD1   | 0,196238  | -0,576887 | <b>-0,1903245</b> | 1841 | 2735 | <b>2288</b>   |
| MXRA8    | -1,086219 | 0,705962  | <b>-0,1901285</b> | 1659 | 2003 | <b>1831</b>   |
| GTF2F2   | -0,873828 | 0,49393   | <b>-0,189949</b>  | 1545 | 2388 | <b>1966,5</b> |
| KIAA0930 | 0,068174  | -0,448058 | <b>-0,189942</b>  | 1258 | 1883 | <b>1570,5</b> |
| ZNF462   | -0,189805 | NaN       | <b>-0,189805</b>  | 1728 | NaN  | <b>1728</b>   |
| LMAN2    | 0,433297  | -0,812667 | <b>-0,189685</b>  | 1247 | 1610 | <b>1428,5</b> |
| TCF7L1   | -0,165302 | -0,213937 | <b>-0,1896195</b> | 1411 | 2065 | <b>1738</b>   |
| ANK3     | 0,008911  | -0,387572 | <b>-0,1893305</b> | 1470 | 2638 | <b>2054</b>   |
| NCOR2    | -1,033919 | 0,655996  | <b>-0,1889615</b> | 1553 | 1689 | <b>1621</b>   |
| NFYA     | -0,054264 | -0,322799 | <b>-0,1885315</b> | 1669 | 2027 | <b>1848</b>   |
| CRABP2   | -0,598334 | 0,221417  | <b>-0,1884585</b> | 1500 | 1660 | <b>1580</b>   |
| TNR      | -0,221461 | -0,155419 | <b>-0,18844</b>   | 1000 | 1495 | <b>1247,5</b> |
| MYO1A    | 0,187583  | -0,564234 | <b>-0,1883255</b> | 1290 | 2245 | <b>1767,5</b> |
| PIGR     | 1,0107    | -1,386762 | <b>-0,188031</b>  | 2222 | 2157 | <b>2189,5</b> |
| HMX1     | -0,110351 | -0,265668 | <b>-0,1880095</b> | 1364 | 2247 | <b>1805,5</b> |
| LTBR     | -0,175083 | -0,20092  | <b>-0,1880015</b> | 1132 | 1739 | <b>1435,5</b> |
| THUMPD3  | -0,684689 | 0,308783  | <b>-0,187953</b>  | 1555 | 2313 | <b>1934</b>   |
| IFIT3    | -0,371582 | -0,003939 | <b>-0,1877605</b> | 1319 | 1642 | <b>1480,5</b> |
| CDKN1B   | -0,143159 | -0,231404 | <b>-0,1872815</b> | 2168 | 2552 | <b>2360</b>   |
| GPRIN3   | 0,340418  | -0,714001 | <b>-0,1867915</b> | 1669 | 2088 | <b>1878,5</b> |
| MCEE     | -0,024838 | -0,348641 | <b>-0,1867395</b> | 1525 | 2005 | <b>1765</b>   |
| P2RY13   | -0,186554 | NaN       | <b>-0,186554</b>  | 1491 | NaN  | <b>1491</b>   |
| ZDHHC7   | -0,222309 | -0,150415 | <b>-0,186362</b>  | 1842 | 1772 | <b>1807</b>   |
| CIC      | -0,186361 | NaN       | <b>-0,186361</b>  | 1625 | NaN  | <b>1625</b>   |
| CBFA2T3  | -0,110579 | -0,262026 | <b>-0,1863025</b> | 1327 | 1423 | <b>1375</b>   |
| LRP5     | 0,06967   | -0,442191 | <b>-0,1862605</b> | 2141 | 2601 | <b>2371</b>   |

|         |           |           |                   |      |      |               |
|---------|-----------|-----------|-------------------|------|------|---------------|
| UBQLN2  | 0,154101  | -0,526019 | <b>-0,185959</b>  | 1334 | 1489 | <b>1411,5</b> |
| C9orf93 | -0,295405 | -0,076378 | <b>-0,1858915</b> | 1331 | 1911 | <b>1621</b>   |
| ZNF160  | 0,36997   | -0,741487 | <b>-0,1857585</b> | 1274 | 1749 | <b>1511,5</b> |
| HS3ST4  | -0,483238 | 0,111761  | <b>-0,1857385</b> | 1461 | 1791 | <b>1626</b>   |
| MAGEF1  | -0,395341 | 0,024204  | <b>-0,1855685</b> | 1947 | 1594 | <b>1770,5</b> |
| GMDS    | -0,726106 | 0,355552  | <b>-0,185277</b>  | 1649 | 1602 | <b>1625,5</b> |
| SDC4    | -0,048425 | -0,322007 | <b>-0,185216</b>  | 1702 | 2376 | <b>2039</b>   |
| PGGT1B  | -0,714068 | 0,343785  | <b>-0,1851415</b> | 1706 | 1793 | <b>1749,5</b> |
| NXF3    | -0,052897 | -0,317144 | <b>-0,1850205</b> | 1467 | 1984 | <b>1725,5</b> |
| ZNF296  | -0,697901 | 0,327894  | <b>-0,1850035</b> | 1333 | 1475 | <b>1404</b>   |
| FAM26F  | -0,037039 | -0,332779 | <b>-0,184909</b>  | 1520 | 1299 | <b>1409,5</b> |
| SYT1    | -0,219981 | -0,149568 | <b>-0,1847745</b> | 1746 | 2020 | <b>1883</b>   |
| OR2G3   | -0,18476  | NaN       | <b>-0,18476</b>   | 1564 | NaN  | <b>1564</b>   |
| TBC1D4  | 0,369756  | -0,739003 | <b>-0,1846235</b> | 2125 | 2175 | <b>2150</b>   |
| FDFT1   | 0,88579   | -1,254857 | <b>-0,1845335</b> | 673  | 1140 | <b>906,5</b>  |
| FAM76B  | -0,187629 | -0,181404 | <b>-0,1845165</b> | 1145 | 1373 | <b>1259</b>   |
| NEDD4L  | -0,146672 | -0,221691 | <b>-0,1841815</b> | 1841 | 2919 | <b>2380</b>   |
| TFPI2   | -0,879361 | 0,511179  | <b>-0,184091</b>  | 1865 | 2896 | <b>2380,5</b> |
| NR0B1   | 0,086634  | -0,454456 | <b>-0,183911</b>  | 1838 | 2980 | <b>2409</b>   |
| SPSB2   | 0,302444  | -0,670223 | <b>-0,1838895</b> | 1586 | 2448 | <b>2017</b>   |
| ZBTB8OS | -0,183568 | NaN       | <b>-0,183568</b>  | 1577 | NaN  | <b>1577</b>   |
| SPATA9  | 0,037235  | -0,404355 | <b>-0,18356</b>   | 1244 | 1486 | <b>1365</b>   |
| KLHL35  | 0,092946  | -0,460036 | <b>-0,183545</b>  | 1192 | 1803 | <b>1497,5</b> |
| SLC2A11 | 0,109778  | -0,476608 | <b>-0,183415</b>  | 1656 | 1795 | <b>1725,5</b> |
| CD55    | -0,18341  | NaN       | <b>-0,18341</b>   | 1803 | NaN  | <b>1803</b>   |
| CRISP2  | 0,005222  | -0,371168 | <b>-0,182973</b>  | 1279 | 1652 | <b>1465,5</b> |
| PAK6    | 0,157802  | -0,522908 | <b>-0,182553</b>  | 1764 | 2170 | <b>1967</b>   |
| PPP4C   | -0,332972 | -0,032025 | <b>-0,1824985</b> | 1909 | 2359 | <b>2134</b>   |
| IFIT5   | -0,099018 | -0,265759 | <b>-0,1823885</b> | 1479 | 1569 | <b>1524</b>   |
| SEMA6B  | -0,103065 | -0,261124 | <b>-0,1820945</b> | 1527 | 1557 | <b>1542</b>   |
| MRPL9   | 0,624979  | -0,989156 | <b>-0,1820885</b> | 1717 | 1885 | <b>1801</b>   |
| PRKAG1  | -0,155214 | -0,208795 | <b>-0,1820045</b> | 789  | 936  | <b>862,5</b>  |
| TFB2M   | -0,690779 | 0,327024  | <b>-0,1818775</b> | 1493 | 1598 | <b>1545,5</b> |
| MFAP3L  | -0,719185 | 0,356179  | <b>-0,181503</b>  | 1552 | 1605 | <b>1578,5</b> |

|           |           |           |                   |      |      |               |
|-----------|-----------|-----------|-------------------|------|------|---------------|
| DPH5      | 0,321017  | -0,683945 | <b>-0,181464</b>  | 1800 | 2089 | <b>1944,5</b> |
| ZNF483    | 0,090687  | -0,45346  | <b>-0,1813865</b> | 1504 | 1950 | <b>1727</b>   |
| ERBB4     | -0,671387 | 0,308698  | <b>-0,1813445</b> | 1546 | 2210 | <b>1878</b>   |
| PAEP      | 0,139754  | -0,502277 | <b>-0,1812615</b> | 1700 | 1905 | <b>1802,5</b> |
| MUC21     | -0,181146 | NaN       | <b>-0,181146</b>  | 1329 | NaN  | <b>1329</b>   |
| SCGB3A2   | 0,213262  | -0,575142 | <b>-0,18094</b>   | 2107 | 2191 | <b>2149</b>   |
| KSR2      | -1,781975 | 1,420114  | <b>-0,1809305</b> | 1068 | 1493 | <b>1280,5</b> |
| CNNM4     | -0,521056 | 0,159585  | <b>-0,1807355</b> | 1919 | 2349 | <b>2134</b>   |
| STK33     | -0,198114 | -0,163266 | <b>-0,18069</b>   | 2173 | 1953 | <b>2063</b>   |
| RSRC1     | -0,358919 | -0,002364 | <b>-0,1806415</b> | 1768 | 1748 | <b>1758</b>   |
| ETV4      | 0,47595   | -0,836878 | <b>-0,180464</b>  | 1325 | 1820 | <b>1572,5</b> |
| CCNE2     | -0,681296 | 0,320556  | <b>-0,18037</b>   | 1190 | 1709 | <b>1449,5</b> |
| RHEBL1    | -0,826505 | 0,466292  | <b>-0,1801065</b> | 1996 | 1303 | <b>1649,5</b> |
| SYT16     | -0,179975 | NaN       | <b>-0,179975</b>  | 1822 | NaN  | <b>1822</b>   |
| HLTF      | 0,422435  | -0,78221  | <b>-0,1798875</b> | 1745 | 2760 | <b>2252,5</b> |
| YWHAB     | 0,767981  | -1,127526 | <b>-0,1797725</b> | 1719 | 2128 | <b>1923,5</b> |
| ATRX      | -0,051059 | -0,308255 | <b>-0,179657</b>  | 1677 | 2242 | <b>1959,5</b> |
| C1orf210  | 0,015709  | -0,374942 | <b>-0,1796165</b> | 849  | 1353 | <b>1101</b>   |
| KCNA2     | 0,487186  | -0,846355 | <b>-0,1795845</b> | 1628 | 2736 | <b>2182</b>   |
| RNF6      | -0,545581 | 0,186488  | <b>-0,1795465</b> | 1824 | 2502 | <b>2163</b>   |
| RPAP1     | -0,179443 | NaN       | <b>-0,179443</b>  | 1499 | NaN  | <b>1499</b>   |
| C10orf125 | -0,012315 | -0,346429 | <b>-0,179372</b>  | 1429 | 1832 | <b>1630,5</b> |
| NEMF      | -0,077117 | -0,281102 | <b>-0,1791095</b> | 1966 | 1974 | <b>1970</b>   |
| CD40      | -0,830102 | 0,473002  | <b>-0,17855</b>   | 2069 | 1812 | <b>1940,5</b> |
| LHX3      | -0,978516 | 0,621653  | <b>-0,1784315</b> | 1768 | 1780 | <b>1774</b>   |
| MRO       | 0,046055  | -0,402911 | <b>-0,178428</b>  | 1583 | 2489 | <b>2036</b>   |
| TMEM60    | 0,0888    | -0,445475 | <b>-0,1783375</b> | 1404 | 1876 | <b>1640</b>   |
| IL17REL   | -0,667244 | 0,311339  | <b>-0,1779525</b> | 892  | 1423 | <b>1157,5</b> |
| URM1      | 0,735879  | -1,091627 | <b>-0,177874</b>  | 1392 | 1852 | <b>1622</b>   |
| RGS7BP    | -0,177674 | NaN       | <b>-0,177674</b>  | 1731 | NaN  | <b>1731</b>   |
| HIST3H3   | -0,046678 | -0,308421 | <b>-0,1775495</b> | 1436 | 1822 | <b>1629</b>   |
| SLC17A9   | -0,177289 | NaN       | <b>-0,177289</b>  | 1567 | NaN  | <b>1567</b>   |
| PEX1      | -0,152694 | -0,201644 | <b>-0,177169</b>  | 1548 | 1763 | <b>1655,5</b> |
| RGMA      | -0,439248 | 0,085058  | <b>-0,177095</b>  | 1087 | 1795 | <b>1441</b>   |

|          |           |           |                   |      |      |               |
|----------|-----------|-----------|-------------------|------|------|---------------|
| S100A6   | -0,331613 | -0,022169 | <b>-0,176891</b>  | 1847 | 2337 | <b>2092</b>   |
| LGMN     | -0,412804 | 0,059377  | <b>-0,1767135</b> | 1470 | 1769 | <b>1619,5</b> |
| OR6X1    | -0,147603 | -0,205788 | <b>-0,1766955</b> | 1215 | 1540 | <b>1377,5</b> |
| FARSA    | -0,838824 | 0,486509  | <b>-0,1761575</b> | 1692 | 1455 | <b>1573,5</b> |
| DUSP9    | 0,559896  | -0,911065 | <b>-0,1755845</b> | 2143 | 2421 | <b>2282</b>   |
| LDLRAD3  | -0,175376 | NaN       | <b>-0,175376</b>  | 1703 | NaN  | <b>1703</b>   |
| NDOR1    | -0,080733 | -0,269755 | <b>-0,175244</b>  | 1648 | 1584 | <b>1616</b>   |
| NAT1     | 0,322366  | -0,672415 | <b>-0,1750245</b> | 1813 | 2938 | <b>2375,5</b> |
| UHRF1    | -0,730141 | 0,380718  | <b>-0,1747115</b> | 1663 | 2116 | <b>1889,5</b> |
| HPS5     | -0,174701 | NaN       | <b>-0,174701</b>  | 1518 | NaN  | <b>1518</b>   |
| CDH8     | -0,174114 | NaN       | <b>-0,174114</b>  | 1843 | NaN  | <b>1843</b>   |
| BCL2L12  | -0,174039 | NaN       | <b>-0,174039</b>  | 1900 | NaN  | <b>1900</b>   |
| MUC1     | 0,384408  | -0,731839 | <b>-0,1737155</b> | 1415 | 2615 | <b>2015</b>   |
| AKT2     | 0,358834  | -0,706173 | <b>-0,1736695</b> | 1860 | 2101 | <b>1980,5</b> |
| MYB      | -0,083516 | -0,263557 | <b>-0,1735365</b> | 1869 | 2738 | <b>2303,5</b> |
| ACADL    | 0,025197  | -0,37226  | <b>-0,1735315</b> | 1815 | 2051 | <b>1933</b>   |
| CRELD1   | -0,242363 | -0,104531 | <b>-0,173447</b>  | 1761 | 2121 | <b>1941</b>   |
| PIPOX    | NaN       | -0,173421 | <b>-0,173421</b>  | NaN  | 2593 | <b>2593</b>   |
| C1orf158 | -0,173402 | NaN       | <b>-0,173402</b>  | 1267 | NaN  | <b>1267</b>   |
| TTC17    | 0,059784  | -0,406309 | <b>-0,1732625</b> | 1308 | 1410 | <b>1359</b>   |
| RNF145   | -0,753356 | 0,406873  | <b>-0,1732415</b> | 1843 | 2175 | <b>2009</b>   |
| NHLRC1   | -0,233828 | -0,112607 | <b>-0,1732175</b> | 1756 | 2383 | <b>2069,5</b> |
| OR10P1   | -0,226867 | -0,11953  | <b>-0,1731985</b> | 1850 | 2120 | <b>1985</b>   |
| PDLIM2   | 0,20507   | -0,551381 | <b>-0,1731555</b> | 1335 | 1951 | <b>1643</b>   |
| OCA2     | 0,154282  | -0,500482 | <b>-0,1731</b>    | 2305 | 1882 | <b>2093,5</b> |
| CXCL16   | 0,368512  | -0,714105 | <b>-0,1727965</b> | 2023 | 1921 | <b>1972</b>   |
| SVOPL    | -0,172751 | NaN       | <b>-0,172751</b>  | 1338 | NaN  | <b>1338</b>   |
| CCL27    | -0,184645 | -0,160812 | <b>-0,1727285</b> | 1755 | 1865 | <b>1810</b>   |
| MYL7     | 0,249639  | -0,594697 | <b>-0,172529</b>  | 1066 | 1516 | <b>1291</b>   |
| CDAN1    | -1,005592 | 0,660857  | <b>-0,1723675</b> | 1016 | 1463 | <b>1239,5</b> |
| SPI1     | 0,056661  | -0,400842 | <b>-0,1720905</b> | 980  | 1700 | <b>1340</b>   |
| TEKT3    | -0,172068 | NaN       | <b>-0,172068</b>  | 1612 | NaN  | <b>1612</b>   |
| MRPL16   | -0,603584 | 0,259588  | <b>-0,171998</b>  | 1439 | 2194 | <b>1816,5</b> |
| ZFAND2A  | 0,024573  | -0,368512 | <b>-0,1719695</b> | 1379 | 2143 | <b>1761</b>   |

|          |           |           |                   |      |      |               |
|----------|-----------|-----------|-------------------|------|------|---------------|
| AK5      | -0,234697 | -0,10922  | <b>-0,1719585</b> | 1612 | 2248 | <b>1930</b>   |
| NTN5     | 0,665291  | -1,008987 | <b>-0,171848</b>  | 1497 | 2828 | <b>2162,5</b> |
| DNAJC15  | -0,117832 | -0,225704 | <b>-0,171768</b>  | 1501 | 2094 | <b>1797,5</b> |
| RELB     | 0,619258  | -0,962512 | <b>-0,171627</b>  | 1974 | 2384 | <b>2179</b>   |
| LENG8    | -0,983331 | 0,640345  | <b>-0,171493</b>  | 1679 | 2069 | <b>1874</b>   |
| NOBOX    | -0,330478 | -0,012491 | <b>-0,1714845</b> | 1810 | 2938 | <b>2374</b>   |
| LMX1B    | -0,17139  | NaN       | <b>-0,17139</b>   | 1336 | NaN  | <b>1336</b>   |
| FOXK1    | -0,408098 | 0,065404  | <b>-0,171347</b>  | 1418 | 1833 | <b>1625,5</b> |
| GRK5     | -0,289093 | -0,05341  | <b>-0,1712515</b> | 1920 | 2032 | <b>1976</b>   |
| ENG      | -0,170944 | NaN       | <b>-0,170944</b>  | 1722 | NaN  | <b>1722</b>   |
| OR6K6    | -0,279007 | -0,062865 | <b>-0,170936</b>  | 1097 | 1938 | <b>1517,5</b> |
| ZNHIT6   | 0,619087  | -0,960837 | <b>-0,170875</b>  | 1742 | 2082 | <b>1912</b>   |
| CAMKK2   | -0,405003 | 0,063542  | <b>-0,1707305</b> | 2221 | 2281 | <b>2251</b>   |
| FANCG    | 0,28444   | -0,62559  | <b>-0,170575</b>  | 1680 | 2482 | <b>2081</b>   |
| COMMD7   | -0,630174 | 0,289992  | <b>-0,170091</b>  | 1616 | 2115 | <b>1865,5</b> |
| USP44    | -0,015456 | -0,324641 | <b>-0,1700485</b> | 1357 | 2187 | <b>1772</b>   |
| C1orf96  | -0,16999  | NaN       | <b>-0,16999</b>   | 1690 | NaN  | <b>1690</b>   |
| RNPS1    | -0,16956  | NaN       | <b>-0,16956</b>   | 1183 | NaN  | <b>1183</b>   |
| S100Z    | -0,169413 | NaN       | <b>-0,169413</b>  | 1489 | NaN  | <b>1489</b>   |
| HSD17B8  | NaN       | -0,169218 | <b>-0,169218</b>  | NaN  | 2660 | <b>2660</b>   |
| EXT2     | -0,754244 | 0,415888  | <b>-0,169178</b>  | 1631 | 2031 | <b>1831</b>   |
| ZNF646   | -0,440798 | 0,102604  | <b>-0,169097</b>  | 1147 | 1623 | <b>1385</b>   |
| CYP2F1   | -0,318002 | -0,019978 | <b>-0,16899</b>   | 1500 | 1860 | <b>1680</b>   |
| AVIL     | 0,444783  | -0,782402 | <b>-0,1688095</b> | 1425 | 1784 | <b>1604,5</b> |
| SLC25A12 | -0,138397 | -0,198878 | <b>-0,1686375</b> | 1268 | 1555 | <b>1411,5</b> |
| MAD2L1BP | -0,555919 | 0,218675  | <b>-0,168622</b>  | 1350 | 1839 | <b>1594,5</b> |
| WDR77    | -0,168094 | NaN       | <b>-0,168094</b>  | 1892 | NaN  | <b>1892</b>   |
| MOBK11B  | -0,817859 | 0,481765  | <b>-0,168047</b>  | 760  | 1222 | <b>991</b>    |
| IL1A     | -0,856865 | 0,52182   | <b>-0,1675225</b> | 1341 | 2136 | <b>1738,5</b> |
| TMEM205  | -0,349331 | 0,014291  | <b>-0,16752</b>   | 1574 | 1422 | <b>1498</b>   |
| C4orf6   | -0,105028 | -0,22997  | <b>-0,167499</b>  | 1914 | 2188 | <b>2051</b>   |
| PPM1H    | 0,151306  | -0,485982 | <b>-0,167338</b>  | 1777 | 2193 | <b>1985</b>   |
| RPE65    | 0,447382  | -0,78194  | <b>-0,167279</b>  | 1849 | 2136 | <b>1992,5</b> |
| CDC6     | -0,547203 | 0,212652  | <b>-0,1672755</b> | 1137 | 1258 | <b>1197,5</b> |



|            |           |           |                   |      |      |               |
|------------|-----------|-----------|-------------------|------|------|---------------|
| MDFIC      | -0,863688 | 0,529537  | <b>-0,1670755</b> | 1219 | 1846 | <b>1532,5</b> |
| KATNB1     | -0,167074 | NaN       | <b>-0,167074</b>  | 1653 | NaN  | <b>1653</b>   |
| SH2D1A     | -0,05602  | -0,277949 | <b>-0,1669845</b> | 1721 | 2612 | <b>2166,5</b> |
| FAM3B      | -0,208568 | -0,124886 | <b>-0,166727</b>  | 1904 | 1754 | <b>1829</b>   |
| ZNF660     | -0,166668 | NaN       | <b>-0,166668</b>  | 1357 | NaN  | <b>1357</b>   |
| TGM2       | -0,365437 | 0,032146  | <b>-0,1666455</b> | 1741 | 2289 | <b>2015</b>   |
| DIS3L2     | -0,085931 | -0,247235 | <b>-0,166583</b>  | 1419 | 1724 | <b>1571,5</b> |
| TTC39C     | 0,052328  | -0,385236 | <b>-0,166454</b>  | 1679 | 1718 | <b>1698,5</b> |
| HMGCLL1    | 0,803831  | -1,136712 | <b>-0,1664405</b> | 1112 | 1766 | <b>1439</b>   |
| PLSCR5     | -0,166221 | NaN       | <b>-0,166221</b>  | 1740 | NaN  | <b>1740</b>   |
| CD34       | -0,600464 | 0,268351  | <b>-0,1660565</b> | 1972 | 1867 | <b>1919,5</b> |
| FGFRL1     | -0,753473 | 0,422579  | <b>-0,165447</b>  | 1477 | 1995 | <b>1736</b>   |
| DDX18      | -0,432706 | 0,101902  | <b>-0,165402</b>  | 1569 | 2030 | <b>1799,5</b> |
| DCBLD2     | 0,526452  | -0,857104 | <b>-0,165326</b>  | 1913 | 2530 | <b>2221,5</b> |
| OR2A5      | -0,451666 | 0,122326  | <b>-0,16467</b>   | 1902 | 1996 | <b>1949</b>   |
| EXOC3L1    | -0,067498 | -0,261762 | <b>-0,16463</b>   | 1385 | 1999 | <b>1692</b>   |
| NFIC       | 0,483847  | -0,81294  | <b>-0,1645465</b> | 1313 | 1852 | <b>1582,5</b> |
| ZNF431     | -0,99401  | 0,664941  | <b>-0,1645345</b> | 1729 | 1779 | <b>1754</b>   |
| TRPM6      | 0,042732  | -0,371789 | <b>-0,1645285</b> | 2240 | 2183 | <b>2211,5</b> |
| CASS4      | 0,197383  | -0,526439 | <b>-0,164528</b>  | 1640 | 1937 | <b>1788,5</b> |
| KRTAP10-11 | -0,164362 | NaN       | <b>-0,164362</b>  | 1187 | NaN  | <b>1187</b>   |
| MMD        | -0,225032 | -0,103254 | <b>-0,164143</b>  | 2156 | 2291 | <b>2223,5</b> |
| USP7       | -0,570307 | 0,242027  | <b>-0,16414</b>   | 1821 | 2348 | <b>2084,5</b> |
| PPP1R10    | -0,068758 | -0,259253 | <b>-0,1640055</b> | 1327 | 1841 | <b>1584</b>   |
| SOX4       | 0,767807  | -1,095729 | <b>-0,163961</b>  | 1856 | 2052 | <b>1954</b>   |
| KHSRP      | 0,289958  | -0,617353 | <b>-0,1636975</b> | 953  | 1691 | <b>1322</b>   |
| PIP4K2C    | -0,8026   | 0,475313  | <b>-0,1636435</b> | 1977 | 1956 | <b>1966,5</b> |
| EPN1       | 0,534631  | -0,861744 | <b>-0,1635565</b> | 1580 | 1962 | <b>1771</b>   |
| KCNA1      | -0,318447 | -0,008504 | <b>-0,1634755</b> | 2063 | 2363 | <b>2213</b>   |
| MGAM       | -1,082781 | 0,756212  | <b>-0,1632845</b> | 1623 | 2227 | <b>1925</b>   |
| MAP3K5     | -0,460849 | 0,134483  | <b>-0,163183</b>  | 1628 | 2138 | <b>1883</b>   |
| PCDHGA3    | -1,019089 | 0,692784  | <b>-0,1631525</b> | 1776 | 2070 | <b>1923</b>   |
| RNF170     | 0,148444  | -0,474664 | <b>-0,16311</b>   | 1693 | 2075 | <b>1884</b>   |
| NDUFAF1    | -0,195842 | -0,13016  | <b>-0,163001</b>  | 1734 | 2652 | <b>2193</b>   |

|          |           |           |                   |      |      |               |
|----------|-----------|-----------|-------------------|------|------|---------------|
| RLF      | -0,090695 | -0,234525 | <b>-0,16261</b>   | 1396 | 2146 | <b>1771</b>   |
| TAX1BP1  | 0,078817  | -0,403473 | <b>-0,162328</b>  | 1518 | 1782 | <b>1650</b>   |
| TUBAL3   | -1,453257 | 1,129067  | <b>-0,162095</b>  | 1327 | 1739 | <b>1533</b>   |
| TCL1B    | 0,133531  | -0,457172 | <b>-0,1618205</b> | 1780 | 2228 | <b>2004</b>   |
| CELF1    | -0,070483 | -0,252947 | <b>-0,161715</b>  | 1384 | 1704 | <b>1544</b>   |
| STAC2    | -0,396214 | 0,07301   | <b>-0,161602</b>  | 1689 | 1934 | <b>1811,5</b> |
| EFHC1    | 0,566009  | -0,889102 | <b>-0,1615465</b> | 1450 | 1842 | <b>1646</b>   |
| DERA     | -0,383731 | 0,060698  | <b>-0,1615165</b> | 1276 | 2497 | <b>1886,5</b> |
| GNAI1    | -0,911764 | 0,588848  | <b>-0,161458</b>  | 1591 | 1405 | <b>1498</b>   |
| CXorf23  | -0,161256 | NaN       | <b>-0,161256</b>  | 1534 | NaN  | <b>1534</b>   |
| UBFD1    | -0,161254 | NaN       | <b>-0,161254</b>  | 1719 | NaN  | <b>1719</b>   |
| RAB2A    | 0,183677  | -0,506025 | <b>-0,161174</b>  | 1745 | 2212 | <b>1978,5</b> |
| ELMOD2   | -0,329922 | 0,007895  | <b>-0,1610135</b> | 1762 | 1714 | <b>1738</b>   |
| C22orf28 | -0,543447 | 0,221619  | <b>-0,160914</b>  | 2048 | 3048 | <b>2548</b>   |
| LGALS14  | 0,260265  | -0,582029 | <b>-0,160882</b>  | 1503 | 1691 | <b>1597</b>   |
| SUSD1    | -0,005709 | -0,315536 | <b>-0,1606225</b> | 1581 | 2219 | <b>1900</b>   |
| MLL4     | 0,734404  | -1,055344 | <b>-0,16047</b>   | 1175 | 1933 | <b>1554</b>   |
| KHDRBS2  | -0,160416 | NaN       | <b>-0,160416</b>  | 1227 | NaN  | <b>1227</b>   |
| CCDC88B  | 0,873383  | -1,193753 | <b>-0,160185</b>  | 1563 | 2272 | <b>1917,5</b> |
| LEO1     | -0,264013 | -0,056094 | <b>-0,1600535</b> | 1738 | 2060 | <b>1899</b>   |
| IQCH     | -0,15957  | NaN       | <b>-0,15957</b>   | 1462 | NaN  | <b>1462</b>   |
| POU2F2   | 0,782086  | -1,100502 | <b>-0,159208</b>  | 1132 | 2359 | <b>1745,5</b> |
| LRP2BP   | 0,325535  | -0,643579 | <b>-0,159022</b>  | 1848 | 1934 | <b>1891</b>   |
| G6PC3    | -0,526742 | 0,209034  | <b>-0,158854</b>  | 1784 | 2372 | <b>2078</b>   |
| GPM6A    | -0,653072 | 0,33577   | <b>-0,158651</b>  | 1562 | 2228 | <b>1895</b>   |
| ARID1A   | -0,360041 | 0,042808  | <b>-0,1586165</b> | 662  | 1195 | <b>928,5</b>  |
| NET1     | -0,570268 | 0,253272  | <b>-0,158498</b>  | 1956 | 2948 | <b>2452</b>   |
| MYL2     | -0,15845  | NaN       | <b>-0,15845</b>   | 1022 | NaN  | <b>1022</b>   |
| SPZ1     | 0,367631  | -0,684084 | <b>-0,1582265</b> | 1496 | 2277 | <b>1886,5</b> |
| MYO19    | 0,094124  | -0,410544 | <b>-0,15821</b>   | 1716 | 2045 | <b>1880,5</b> |
| MOSC2    | -0,219872 | -0,096479 | <b>-0,1581755</b> | 1564 | 2135 | <b>1849,5</b> |
| PRKAR2B  | -0,43041  | 0,114119  | <b>-0,1581455</b> | 1874 | 1911 | <b>1892,5</b> |
| LPIN3    | -0,692106 | 0,376288  | <b>-0,157909</b>  | 1540 | 1344 | <b>1442</b>   |
| SLC24A2  | -0,679264 | 0,363841  | <b>-0,1577115</b> | 1436 | 2225 | <b>1830,5</b> |

|           |           |           |                   |      |      |               |
|-----------|-----------|-----------|-------------------|------|------|---------------|
| HEY1      | -0,001429 | -0,313209 | <b>-0,157319</b>  | 1174 | 1984 | <b>1579</b>   |
| PLEKHG1   | 0,009724  | -0,324268 | <b>-0,157272</b>  | 1501 | 1795 | <b>1648</b>   |
| PTPN7     | 0,133895  | -0,448363 | <b>-0,157234</b>  | 1834 | 2110 | <b>1972</b>   |
| TMEM214   | -0,180471 | -0,133818 | <b>-0,1571445</b> | 1162 | 1534 | <b>1348</b>   |
| AGTPBP1   | -0,210304 | -0,103967 | <b>-0,1571355</b> | 2030 | 1603 | <b>1816,5</b> |
| CBY1      | 0,330953  | -0,644989 | <b>-0,157018</b>  | 1809 | 2639 | <b>2224</b>   |
| DIMT1     | 0,572337  | -0,886369 | <b>-0,157016</b>  | 1828 | 2135 | <b>1981,5</b> |
| PROC      | -0,247545 | -0,066313 | <b>-0,156929</b>  | 1314 | 2119 | <b>1716,5</b> |
| PPM1L     | -0,412004 | 0,098671  | <b>-0,1566665</b> | 1644 | 2046 | <b>1845</b>   |
| SPDEF     | 0,12006   | -0,433116 | <b>-0,156528</b>  | 1917 | 2995 | <b>2456</b>   |
| CAP2      | 0,070982  | -0,383548 | <b>-0,156283</b>  | 2169 | 2221 | <b>2195</b>   |
| CYC1      | NaN       | -0,15623  | <b>-0,15623</b>   | NaN  | 2665 | <b>2665</b>   |
| MRPL36    | -0,242654 | -0,069605 | <b>-0,1561295</b> | 2479 | 2437 | <b>2458</b>   |
| CTSO      | -0,28687  | -0,025386 | <b>-0,156128</b>  | 2285 | 2554 | <b>2419,5</b> |
| ENHO      | -0,376654 | 0,064603  | <b>-0,1560255</b> | 1514 | 1657 | <b>1585,5</b> |
| PTRH2     | -0,177668 | -0,134253 | <b>-0,1559605</b> | 828  | 1326 | <b>1077</b>   |
| COG8      | -0,155833 | NaN       | <b>-0,155833</b>  | 1377 | NaN  | <b>1377</b>   |
| ACPP      | -0,451627 | 0,140258  | <b>-0,1556845</b> | 1064 | 2182 | <b>1623</b>   |
| PHYHD1    | 0,097252  | -0,408344 | <b>-0,155546</b>  | 1558 | 2155 | <b>1856,5</b> |
| GLYAT     | -0,37306  | 0,062061  | <b>-0,1554995</b> | 2063 | 3166 | <b>2614,5</b> |
| GALNT11   | 0,121077  | -0,431422 | <b>-0,1551725</b> | 1558 | 2326 | <b>1942</b>   |
| SYT7      | -0,155004 | NaN       | <b>-0,155004</b>  | 1640 | NaN  | <b>1640</b>   |
| HRG       | 0,659748  | -0,969718 | <b>-0,154985</b>  | 1061 | 1462 | <b>1261,5</b> |
| FAM158A   | 0,769316  | -1,078943 | <b>-0,1548135</b> | 1633 | 1918 | <b>1775,5</b> |
| DPF1      | -0,086933 | -0,222646 | <b>-0,1547895</b> | 1212 | 1791 | <b>1501,5</b> |
| GIN54     | -0,002292 | -0,307168 | <b>-0,15473</b>   | 1527 | 2381 | <b>1954</b>   |
| COL24A1   | -0,85329  | 0,544218  | <b>-0,154536</b>  | 1638 | 2186 | <b>1912</b>   |
| ADCYAP1R1 | -0,153678 | NaN       | <b>-0,153678</b>  | 1544 | NaN  | <b>1544</b>   |
| KCND1     | -0,698723 | 0,391508  | <b>-0,1536075</b> | 1338 | 2066 | <b>1702</b>   |
| C20orf177 | 0,225449  | -0,532653 | <b>-0,153602</b>  | 1838 | 1992 | <b>1915</b>   |
| SPATA18   | -0,170687 | -0,136497 | <b>-0,153592</b>  | 1256 | 1891 | <b>1573,5</b> |
| C22orf33  | -0,579342 | 0,272231  | <b>-0,1535555</b> | 1188 | 1775 | <b>1481,5</b> |
| NDUFC1    | -0,305181 | -0,001921 | <b>-0,153551</b>  | 1182 | 2201 | <b>1691,5</b> |
| E4F1      | -0,36929  | 0,06233   | <b>-0,15348</b>   | 1596 | 2475 | <b>2035,5</b> |

|           |           |           |                   |      |      |               |
|-----------|-----------|-----------|-------------------|------|------|---------------|
| CENPBD1   | -0,153358 | NaN       | <b>-0,153358</b>  | 1448 | NaN  | <b>1448</b>   |
| KCMF1     | -0,831452 | 0,525956  | <b>-0,152748</b>  | 650  | 1082 | <b>866</b>    |
| PLBD1     | -0,642617 | 0,337306  | <b>-0,1526555</b> | 1520 | 2047 | <b>1783,5</b> |
| RDH12     | -0,292909 | -0,011967 | <b>-0,152438</b>  | 800  | 2132 | <b>1466</b>   |
| SEPHS2    | -0,640742 | 0,335969  | <b>-0,1523865</b> | 2043 | 3332 | <b>2687,5</b> |
| C12orf41  | -0,620755 | 0,31609   | <b>-0,1523325</b> | 1405 | 2014 | <b>1709,5</b> |
| C10orf114 | 0,313788  | -0,618405 | <b>-0,1523085</b> | 1277 | 2031 | <b>1654</b>   |
| CTSL2     | -0,431188 | 0,126649  | <b>-0,1522695</b> | 1608 | 1902 | <b>1755</b>   |
| RCE1      | 1,42583   | -1,729595 | <b>-0,1518825</b> | 1910 | 1600 | <b>1755</b>   |
| LENG9     | -0,134518 | -0,169045 | <b>-0,1517815</b> | 1583 | 2553 | <b>2068</b>   |
| PARD6A    | -0,297543 | -0,005692 | <b>-0,1516175</b> | 1711 | 1598 | <b>1654,5</b> |
| MOBK12C   | -0,229364 | -0,0737   | <b>-0,151532</b>  | 1661 | 1476 | <b>1568,5</b> |
| PPWD1     | -0,697763 | 0,395281  | <b>-0,151241</b>  | 1638 | 2573 | <b>2105,5</b> |
| MCOLN3    | -0,35819  | 0,056139  | <b>-0,1510255</b> | 1667 | 2210 | <b>1938,5</b> |
| TRPV3     | 0,210153  | -0,512002 | <b>-0,1509245</b> | 1337 | 2473 | <b>1905</b>   |
| LAT       | -0,061051 | -0,240757 | <b>-0,150904</b>  | 1639 | 2134 | <b>1886,5</b> |
| MAP2K5    | -0,995803 | 0,694159  | <b>-0,150822</b>  | 2120 | 1583 | <b>1851,5</b> |
| AP3D1     | -0,150686 | NaN       | <b>-0,150686</b>  | 2214 | NaN  | <b>2214</b>   |
| PELO      | 0,370848  | -0,67134  | <b>-0,150246</b>  | 1491 | 1986 | <b>1738,5</b> |
| PCGF6     | -0,166553 | -0,133801 | <b>-0,150177</b>  | 1554 | 2362 | <b>1958</b>   |
| ACE       | -0,604723 | 0,304609  | <b>-0,150057</b>  | 1144 | 1764 | <b>1454</b>   |
| CDK14     | 0,027604  | -0,327226 | <b>-0,149811</b>  | 1258 | 1705 | <b>1481,5</b> |
| CHD1      | -0,503328 | 0,203832  | <b>-0,149748</b>  | 1607 | 2694 | <b>2150,5</b> |
| NCK1      | 0,203126  | -0,502243 | <b>-0,1495585</b> | 1796 | 2362 | <b>2079</b>   |
| ACTL9     | 0,355311  | -0,654232 | <b>-0,1494605</b> | 1311 | 1846 | <b>1578,5</b> |
| FNDC4     | 0,319133  | -0,618043 | <b>-0,149455</b>  | 2112 | 2324 | <b>2218</b>   |
| C3orf78   | -0,294165 | -0,003912 | <b>-0,1490385</b> | 1762 | 2140 | <b>1951</b>   |
| ST14      | 0,369082  | -0,667149 | <b>-0,1490335</b> | 1598 | 1897 | <b>1747,5</b> |
| TCHHL1    | 0,12043   | -0,418485 | <b>-0,1490275</b> | 1604 | 1903 | <b>1753,5</b> |
| RPL9      | 0,015515  | -0,31341  | <b>-0,1489475</b> | 943  | 1180 | <b>1061,5</b> |
| SIK1      | -0,110827 | -0,186862 | <b>-0,1488445</b> | 1744 | 2251 | <b>1997,5</b> |
| ZNF100    | -0,164623 | -0,132754 | <b>-0,1486885</b> | 1392 | 2085 | <b>1738,5</b> |
| CST8      | 0,020436  | -0,317593 | <b>-0,1485785</b> | 1479 | 1718 | <b>1598,5</b> |
| NPY2R     | -0,116064 | -0,180681 | <b>-0,1483725</b> | 1581 | 1427 | <b>1504</b>   |

|          |           |           |                   |      |      |               |
|----------|-----------|-----------|-------------------|------|------|---------------|
| THRAP3   | -0,449709 | 0,153389  | <b>-0,14816</b>   | 1636 | 2296 | <b>1966</b>   |
| SPRR3    | 0,436259  | -0,732466 | <b>-0,1481035</b> | 1116 | 1482 | <b>1299</b>   |
| SNTA1    | -0,148079 | NaN       | <b>-0,148079</b>  | 1836 | NaN  | <b>1836</b>   |
| QRFP     | -0,147958 | NaN       | <b>-0,147958</b>  | 1972 | NaN  | <b>1972</b>   |
| FXYD3    | 0,493353  | -0,788926 | <b>-0,1477865</b> | 1627 | 3045 | <b>2336</b>   |
| SAMD12   | -0,013982 | -0,280974 | <b>-0,147478</b>  | 1447 | 1903 | <b>1675</b>   |
| GNAT2    | -0,147378 | NaN       | <b>-0,147378</b>  | 1558 | NaN  | <b>1558</b>   |
| OR5W2    | -0,147346 | NaN       | <b>-0,147346</b>  | 1740 | NaN  | <b>1740</b>   |
| GPR113   | -0,147233 | NaN       | <b>-0,147233</b>  | 1815 | NaN  | <b>1815</b>   |
| GEN1     | -0,166319 | -0,126826 | <b>-0,1465725</b> | 1709 | 2506 | <b>2107,5</b> |
| AQP5     | 0,75149   | -1,044625 | <b>-0,1465675</b> | 1214 | 1978 | <b>1596</b>   |
| NAA25    | -0,146477 | NaN       | <b>-0,146477</b>  | 1674 | NaN  | <b>1674</b>   |
| SLC36A3  | -0,365819 | 0,073141  | <b>-0,146339</b>  | 1909 | 2196 | <b>2052,5</b> |
| AARS     | -0,377949 | 0,085334  | <b>-0,1463075</b> | 1040 | 2204 | <b>1622</b>   |
| SERP1    | -0,146222 | NaN       | <b>-0,146222</b>  | 1541 | NaN  | <b>1541</b>   |
| GK       | -0,890924 | 0,598671  | <b>-0,1461265</b> | 1844 | 1739 | <b>1791,5</b> |
| HINT1    | -0,308377 | 0,016506  | <b>-0,1459355</b> | 2017 | 2621 | <b>2319</b>   |
| RAPGEF4  | -0,170194 | -0,121654 | <b>-0,145924</b>  | 1985 | 2047 | <b>2016</b>   |
| ODZ1     | -0,145822 | NaN       | <b>-0,145822</b>  | 1221 | NaN  | <b>1221</b>   |
| RERGL    | 0,101417  | -0,392998 | <b>-0,1457905</b> | 1735 | 1626 | <b>1680,5</b> |
| ROBO3    | -0,112126 | -0,178527 | <b>-0,1453265</b> | 2052 | 1878 | <b>1965</b>   |
| RCOR2    | 0,074088  | -0,364235 | <b>-0,1450735</b> | 1360 | 1694 | <b>1527</b>   |
| BMP2     | 0,095465  | -0,385552 | <b>-0,1450435</b> | 2134 | 2260 | <b>2197</b>   |
| IKBKB    | 0,823758  | -1,113807 | <b>-0,1450245</b> | 1564 | 2095 | <b>1829,5</b> |
| ZNF692   | -0,144694 | NaN       | <b>-0,144694</b>  | 1634 | NaN  | <b>1634</b>   |
| TUSC2    | 0,769176  | -1,058462 | <b>-0,144643</b>  | 1730 | 1906 | <b>1818</b>   |
| ASB10    | -0,742073 | 0,45342   | <b>-0,1443265</b> | 1042 | 2411 | <b>1726,5</b> |
| SLC22A11 | 0,058978  | -0,347583 | <b>-0,1443025</b> | 1377 | 1710 | <b>1543,5</b> |
| GALNT8   | -0,6275   | 0,33908   | <b>-0,14421</b>   | 1257 | 1321 | <b>1289</b>   |
| C1orf174 | -0,348263 | 0,060316  | <b>-0,1439735</b> | 1593 | 2015 | <b>1804</b>   |
| ITGB2    | -0,780744 | 0,49309   | <b>-0,143827</b>  | 1466 | 2279 | <b>1872,5</b> |
| ZNF579   | -2,270746 | 1,983486  | <b>-0,14363</b>   | 1856 | 2577 | <b>2216,5</b> |
| ENTPD2   | -0,143525 | NaN       | <b>-0,143525</b>  | 1857 | NaN  | <b>1857</b>   |
| CDC42EP1 | -0,143374 | NaN       | <b>-0,143374</b>  | 1916 | NaN  | <b>1916</b>   |

|          |           |           |                   |      |      |               |
|----------|-----------|-----------|-------------------|------|------|---------------|
| ADAM19   | -0,769274 | 0,482946  | <b>-0,143164</b>  | 1539 | 1841 | <b>1690</b>   |
| TRIM41   | -0,472761 | 0,186457  | <b>-0,143152</b>  | 1562 | 2525 | <b>2043,5</b> |
| IREB2    | NaN       | -0,143127 | <b>-0,143127</b>  | NaN  | 2401 | <b>2401</b>   |
| SLC9A5   | -0,436686 | 0,150758  | <b>-0,142964</b>  | 1195 | 1482 | <b>1338,5</b> |
| HNRNPF   | 0,067328  | -0,353193 | <b>-0,1429325</b> | 1315 | 2200 | <b>1757,5</b> |
| WFDC12   | -0,018506 | -0,267307 | <b>-0,1429065</b> | 1805 | 2372 | <b>2088,5</b> |
| ASXL2    | -0,61945  | 0,333687  | <b>-0,1428815</b> | 1815 | 1581 | <b>1698</b>   |
| RTN4IP1  | -0,141189 | -0,143903 | <b>-0,142546</b>  | 1400 | 1837 | <b>1618,5</b> |
| CYR1     | -0,14249  | NaN       | <b>-0,14249</b>   | 1764 | NaN  | <b>1764</b>   |
| KIAA0319 | -0,690007 | 0,405218  | <b>-0,1423945</b> | 1927 | 2185 | <b>2056</b>   |
| SLITRK3  | -0,142085 | NaN       | <b>-0,142085</b>  | 1724 | NaN  | <b>1724</b>   |
| HMGCR    | 0,169755  | -0,453737 | <b>-0,141991</b>  | 1572 | 2674 | <b>2123</b>   |
| NCEH1    | 0,451508  | -0,733648 | <b>-0,14107</b>   | 1809 | 1668 | <b>1738,5</b> |
| DSG2     | 0,16817   | -0,450279 | <b>-0,1410545</b> | 1448 | 1940 | <b>1694</b>   |
| LTBP4    | -0,140898 | NaN       | <b>-0,140898</b>  | 1469 | NaN  | <b>1469</b>   |
| NUP188   | 0,268949  | -0,550724 | <b>-0,1408875</b> | 2002 | 1978 | <b>1990</b>   |
| PDK4     | 0,672821  | -0,954374 | <b>-0,1407765</b> | 1127 | 2102 | <b>1614,5</b> |
| C4orf32  | -0,140753 | NaN       | <b>-0,140753</b>  | 1420 | NaN  | <b>1420</b>   |
| PSG8     | 0,004148  | -0,285204 | <b>-0,140528</b>  | 1082 | 1540 | <b>1311</b>   |
| DOCK9    | -0,487387 | 0,206481  | <b>-0,140453</b>  | 1989 | 2346 | <b>2167,5</b> |
| HYLS1    | -0,020353 | -0,260472 | <b>-0,1404125</b> | 1998 | 2716 | <b>2357</b>   |
| KDM6B    | -0,078642 | -0,20128  | <b>-0,139961</b>  | 1831 | 1969 | <b>1900</b>   |
| PPP2R1A  | -0,144463 | -0,134167 | <b>-0,139315</b>  | 1491 | 1776 | <b>1633,5</b> |
| RDH11    | NaN       | -0,138976 | <b>-0,138976</b>  | NaN  | 2923 | <b>2923</b>   |
| GSK3A    | -0,0839   | -0,193887 | <b>-0,1388935</b> | 1911 | 1669 | <b>1790</b>   |
| SPCS2    | -0,029893 | -0,24768  | <b>-0,1387865</b> | 1383 | 1236 | <b>1309,5</b> |
| NUDT9    | 0,572659  | -0,850099 | <b>-0,13872</b>   | 1656 | 2148 | <b>1902</b>   |
| CCDC90B  | 0,205749  | -0,48289  | <b>-0,1385705</b> | 1687 | 2066 | <b>1876,5</b> |
| SCRN3    | -0,138494 | NaN       | <b>-0,138494</b>  | 2024 | NaN  | <b>2024</b>   |
| MAPRE2   | -0,138362 | NaN       | <b>-0,138362</b>  | 1920 | NaN  | <b>1920</b>   |
| ATP6V1F  | 0,20915   | -0,485766 | <b>-0,138308</b>  | 1293 | 1729 | <b>1511</b>   |
| C5orf39  | -0,332645 | 0,05659   | <b>-0,1380275</b> | 1511 | 1684 | <b>1597,5</b> |
| HMGA2    | -0,329683 | 0,053938  | <b>-0,1378725</b> | 1249 | 1595 | <b>1422</b>   |
| ZIK1     | -0,137844 | NaN       | <b>-0,137844</b>  | 1420 | NaN  | <b>1420</b>   |

|          |           |           |                   |      |      |               |
|----------|-----------|-----------|-------------------|------|------|---------------|
| HSD3B2   | -0,481522 | 0,20657   | <b>-0,137476</b>  | 1207 | 1868 | <b>1537,5</b> |
| CES3     | -0,570619 | 0,296276  | <b>-0,1371715</b> | 1458 | 2069 | <b>1763,5</b> |
| MRPS23   | -0,137111 | NaN       | <b>-0,137111</b>  | 1637 | NaN  | <b>1637</b>   |
| ATP11B   | 0,191308  | -0,465493 | <b>-0,1370925</b> | 1906 | 2986 | <b>2446</b>   |
| DEFB125  | -0,137031 | NaN       | <b>-0,137031</b>  | 2048 | NaN  | <b>2048</b>   |
| NPY5R    | -0,136827 | NaN       | <b>-0,136827</b>  | 1592 | NaN  | <b>1592</b>   |
| SAMD8    | -0,36454  | 0,0912    | <b>-0,13667</b>   | 1668 | 2289 | <b>1978,5</b> |
| TNIP3    | -0,136655 | NaN       | <b>-0,136655</b>  | 1298 | NaN  | <b>1298</b>   |
| ZSWIM4   | -0,136638 | NaN       | <b>-0,136638</b>  | 1676 | NaN  | <b>1676</b>   |
| GJD3     | 0,211655  | -0,484918 | <b>-0,1366315</b> | 1423 | 1927 | <b>1675</b>   |
| TIMP1    | -0,117228 | -0,155941 | <b>-0,1365845</b> | 1591 | 1660 | <b>1625,5</b> |
| USHBP1   | -0,526256 | 0,253568  | <b>-0,136344</b>  | 1668 | 2065 | <b>1866,5</b> |
| PPFIA1   | 0,186037  | -0,458575 | <b>-0,136269</b>  | 1830 | 2198 | <b>2014</b>   |
| ATP6V1B2 | 0,906693  | -1,179107 | <b>-0,136207</b>  | 1760 | 2058 | <b>1909</b>   |
| RRM2B    | -0,638343 | 0,366156  | <b>-0,1360935</b> | 1988 | 2230 | <b>2109</b>   |
| BACH2    | -0,784864 | 0,512921  | <b>-0,1359715</b> | 1622 | 1878 | <b>1750</b>   |
| BTNL8    | -0,471814 | 0,200038  | <b>-0,135888</b>  | 622  | 1857 | <b>1239,5</b> |
| PEX5     | -0,145791 | -0,125896 | <b>-0,1358435</b> | 1500 | 2702 | <b>2101</b>   |
| PIK3CB   | 0,474612  | -0,746052 | <b>-0,13572</b>   | 1734 | 2120 | <b>1927</b>   |
| TSC2     | 0,170759  | -0,441913 | <b>-0,135577</b>  | 1596 | 2034 | <b>1815</b>   |
| NDUFV3   | -0,47303  | 0,202008  | <b>-0,135511</b>  | 1240 | 2265 | <b>1752,5</b> |
| GIT1     | 0,217542  | -0,488306 | <b>-0,135382</b>  | 2103 | 1918 | <b>2010,5</b> |
| CASP8    | -0,398184 | 0,127555  | <b>-0,1353145</b> | 2055 | 2103 | <b>2079</b>   |
| ANGPT2   | NaN       | -0,135275 | <b>-0,135275</b>  | NaN  | 2867 | <b>2867</b>   |
| ALDH3B2  | -0,582432 | 0,311992  | <b>-0,13522</b>   | 1746 | 2310 | <b>2028</b>   |
| CAMSAP3  | 0,626454  | -0,896862 | <b>-0,135204</b>  | 1683 | 1738 | <b>1710,5</b> |
| MTF1     | 0,239731  | -0,509979 | <b>-0,135124</b>  | 2137 | 3125 | <b>2631</b>   |
| NTRK3    | 0,64347   | -0,913628 | <b>-0,135079</b>  | 1693 | 2190 | <b>1941,5</b> |
| HSPA9    | NaN       | -0,135035 | <b>-0,135035</b>  | NaN  | 1684 | <b>1684</b>   |
| CYP27C1  | -0,35478  | 0,08495   | <b>-0,134915</b>  | 1625 | 1935 | <b>1780</b>   |
| NOL6     | -0,134814 | NaN       | <b>-0,134814</b>  | 1578 | NaN  | <b>1578</b>   |
| ARL9     | -0,134506 | NaN       | <b>-0,134506</b>  | 1656 | NaN  | <b>1656</b>   |
| SMPD2    | -0,551721 | 0,283392  | <b>-0,1341645</b> | 1599 | 1774 | <b>1686,5</b> |
| LRPAP1   | 0,153649  | -0,421884 | <b>-0,1341175</b> | 1352 | 1506 | <b>1429</b>   |

|          |           |           |                   |      |      |               |
|----------|-----------|-----------|-------------------|------|------|---------------|
| RNF4     | 0,302766  | -0,570817 | <b>-0,1340255</b> | 999  | 1896 | <b>1447,5</b> |
| TEX11    | -0,809986 | 0,542577  | <b>-0,1337045</b> | 981  | 1348 | <b>1164,5</b> |
| PADI6    | 0,203866  | -0,470993 | <b>-0,1335635</b> | 1311 | 1881 | <b>1596</b>   |
| OR5AK2   | -0,01986  | -0,247057 | <b>-0,1334585</b> | 1799 | 1324 | <b>1561,5</b> |
| LRRC46   | -0,698043 | 0,431376  | <b>-0,1333335</b> | 1214 | 1607 | <b>1410,5</b> |
| SLC10A4  | -0,108405 | -0,158096 | <b>-0,1332505</b> | 1612 | 1972 | <b>1792</b>   |
| ITGB5    | -0,133716 | -0,132291 | <b>-0,1330035</b> | 1717 | 2405 | <b>2061</b>   |
| LY6D     | -0,039324 | -0,226567 | <b>-0,1329455</b> | 620  | 1598 | <b>1109</b>   |
| PFN4     | 0,880579  | -1,146293 | <b>-0,132857</b>  | 1732 | 2551 | <b>2141,5</b> |
| KCNK17   | -0,315625 | 0,050064  | <b>-0,1327805</b> | 2039 | 2570 | <b>2304,5</b> |
| ABHD8    | -0,155514 | -0,109952 | <b>-0,132733</b>  | 1662 | 2132 | <b>1897</b>   |
| IMMT     | -0,618361 | 0,352965  | <b>-0,132698</b>  | 1658 | 2020 | <b>1839</b>   |
| ASB13    | -1,084018 | 0,818724  | <b>-0,132647</b>  | 1457 | 2583 | <b>2020</b>   |
| WDR96    | 0,225726  | -0,490951 | <b>-0,1326125</b> | 1904 | 2379 | <b>2141,5</b> |
| SLC24A3  | -1,112426 | 0,847627  | <b>-0,1323995</b> | 1264 | 1925 | <b>1594,5</b> |
| OR8J3    | -0,131958 | NaN       | <b>-0,131958</b>  | 1599 | NaN  | <b>1599</b>   |
| CRB1     | -0,014481 | -0,249335 | <b>-0,131908</b>  | 1597 | 2226 | <b>1911,5</b> |
| SLPI     | 0,390702  | -0,654361 | <b>-0,1318295</b> | 2068 | 2882 | <b>2475</b>   |
| SPERT    | 0,502743  | -0,766354 | <b>-0,1318055</b> | 1417 | 1995 | <b>1706</b>   |
| GTF2H1   | -0,457754 | 0,1947    | <b>-0,131527</b>  | 1609 | 2363 | <b>1986</b>   |
| TEKT1    | -0,059591 | -0,203394 | <b>-0,1314925</b> | 1712 | 2318 | <b>2015</b>   |
| HHIPL2   | -0,1314   | NaN       | <b>-0,1314</b>    | 1411 | NaN  | <b>1411</b>   |
| CCDC105  | -0,131135 | NaN       | <b>-0,131135</b>  | 1432 | NaN  | <b>1432</b>   |
| ZNF438   | -0,131083 | NaN       | <b>-0,131083</b>  | 1516 | NaN  | <b>1516</b>   |
| ADAM10   | -0,522214 | 0,260107  | <b>-0,1310535</b> | 1874 | 2299 | <b>2086,5</b> |
| ZDHHC1   | -0,095952 | -0,165886 | <b>-0,130919</b>  | 1745 | 1793 | <b>1769</b>   |
| IL15     | 0,186125  | -0,447891 | <b>-0,130883</b>  | 2016 | 2230 | <b>2123</b>   |
| DCX      | 0,167716  | -0,429448 | <b>-0,130866</b>  | 1324 | 1618 | <b>1471</b>   |
| C6orf146 | -0,130332 | NaN       | <b>-0,130332</b>  | 1795 | NaN  | <b>1795</b>   |
| WDYHV1   | -0,130195 | NaN       | <b>-0,130195</b>  | 1650 | NaN  | <b>1650</b>   |
| PDE8A    | 0,203586  | -0,462884 | <b>-0,129649</b>  | 2076 | 1868 | <b>1972</b>   |
| MRI1     | -0,971479 | 0,712336  | <b>-0,1295715</b> | 1353 | 2185 | <b>1769</b>   |
| CACNA1S  | 0,036259  | -0,295174 | <b>-0,1294575</b> | 1292 | 1496 | <b>1394</b>   |
| PCSK7    | -0,048103 | -0,210774 | <b>-0,1294385</b> | 1710 | 1958 | <b>1834</b>   |



|          |           |           |                   |      |      |               |
|----------|-----------|-----------|-------------------|------|------|---------------|
| PRKCG    | -0,595018 | 0,337022  | <b>-0,128998</b>  | 1963 | 2617 | <b>2290</b>   |
| SMNDC1   | -0,566012 | 0,308037  | <b>-0,1289875</b> | 1251 | 1880 | <b>1565,5</b> |
| PMM2     | -0,415413 | 0,157751  | <b>-0,128831</b>  | 1074 | 1617 | <b>1345,5</b> |
| ZNF652   | -0,128784 | NaN       | <b>-0,128784</b>  | 1598 | NaN  | <b>1598</b>   |
| USP40    | -0,355028 | 0,097699  | <b>-0,1286645</b> | 1736 | 2624 | <b>2180</b>   |
| CLDN16   | -0,318584 | 0,061427  | <b>-0,1285785</b> | 1562 | 2172 | <b>1867</b>   |
| PPP2R3A  | -0,395633 | 0,138724  | <b>-0,1284545</b> | 1618 | 1983 | <b>1800,5</b> |
| C1orf141 | -0,128063 | NaN       | <b>-0,128063</b>  | 2111 | NaN  | <b>2111</b>   |
| CRISP1   | -0,275852 | 0,019909  | <b>-0,1279715</b> | 2258 | 2989 | <b>2623,5</b> |
| HAVCR2   | -0,288883 | 0,033337  | <b>-0,127773</b>  | 1263 | 1417 | <b>1340</b>   |
| MSX2     | 0,920873  | -1,176265 | <b>-0,127696</b>  | 1129 | 1641 | <b>1385</b>   |
| ZP2      | 0,047864  | -0,303132 | <b>-0,127634</b>  | 1902 | 2289 | <b>2095,5</b> |
| PACSIN2  | 0,167702  | -0,422751 | <b>-0,1275245</b> | 1353 | 1694 | <b>1523,5</b> |
| MEFV     | -0,184173 | -0,070535 | <b>-0,127354</b>  | 1531 | 2283 | <b>1907</b>   |
| ASMT     | -0,227077 | -0,026696 | <b>-0,1268865</b> | 1804 | 1691 | <b>1747,5</b> |
| VMP1     | 0,43747   | -0,691187 | <b>-0,1268585</b> | 1867 | 2386 | <b>2126,5</b> |
| SLC8A1   | -0,809212 | 0,555526  | <b>-0,126843</b>  | 1558 | 1739 | <b>1648,5</b> |
| MCCC1    | 0,35007   | -0,603734 | <b>-0,126832</b>  | 1624 | 2000 | <b>1812</b>   |
| SSX5     | 0,22613   | -0,478677 | <b>-0,1262735</b> | 1336 | 2482 | <b>1909</b>   |
| C15orf48 | -0,126251 | NaN       | <b>-0,126251</b>  | 1578 | NaN  | <b>1578</b>   |
| LSM1     | -0,31212  | 0,059762  | <b>-0,126179</b>  | 1288 | 2417 | <b>1852,5</b> |
| GABRA2   | -0,956007 | 0,704403  | <b>-0,125802</b>  | 1383 | 2274 | <b>1828,5</b> |
| RAB41    | -0,124162 | -0,127299 | <b>-0,1257305</b> | 1604 | 2261 | <b>1932,5</b> |
| PPAPDC3  | -0,349934 | 0,098516  | <b>-0,125709</b>  | 1638 | 1938 | <b>1788</b>   |
| SCAPER   | 0,542984  | -0,794348 | <b>-0,125682</b>  | 1653 | 2169 | <b>1911</b>   |
| RPRM     | 0,531001  | -0,782039 | <b>-0,125519</b>  | 1718 | 2217 | <b>1967,5</b> |
| ZNF3     | -0,125466 | NaN       | <b>-0,125466</b>  | 2126 | NaN  | <b>2126</b>   |
| HSPB11   | 0,191367  | -0,442223 | <b>-0,125428</b>  | 1400 | 1662 | <b>1531</b>   |
| VASP     | -0,005562 | -0,245238 | <b>-0,1254</b>    | 1550 | 1842 | <b>1696</b>   |
| TMEM196  | -0,015043 | -0,23441  | <b>-0,1247265</b> | 1156 | 1347 | <b>1251,5</b> |
| STOML2   | 0,435926  | -0,685361 | <b>-0,1247175</b> | 1813 | 2188 | <b>2000,5</b> |
| C10orf47 | -0,184612 | -0,064772 | <b>-0,124692</b>  | 1508 | 1909 | <b>1708,5</b> |
| ZNFX1    | -0,704802 | 0,455607  | <b>-0,1245975</b> | 1507 | 1634 | <b>1570,5</b> |
| OR51G2   | 0,626502  | -0,875428 | <b>-0,124463</b>  | 1580 | 1687 | <b>1633,5</b> |

|          |           |           |                   |      |      |               |
|----------|-----------|-----------|-------------------|------|------|---------------|
| KIAA0889 | 0,31195   | -0,560837 | <b>-0,1244435</b> | 1624 | 2677 | <b>2150,5</b> |
| GRIN1    | -0,121232 | -0,127074 | <b>-0,124153</b>  | 1244 | 1975 | <b>1609,5</b> |
| C19orf71 | -0,342052 | 0,093936  | <b>-0,124058</b>  | 872  | 1168 | <b>1020</b>   |
| APOA1BP  | 0,269887  | -0,517201 | <b>-0,123657</b>  | 1672 | 2524 | <b>2098</b>   |
| JPH4     | -0,023936 | -0,223351 | <b>-0,1236435</b> | 1888 | 2434 | <b>2161</b>   |
| WASF1    | -0,081667 | -0,165263 | <b>-0,123465</b>  | 878  | 1252 | <b>1065</b>   |
| ADRA2B   | -0,1234   | NaN       | <b>-0,1234</b>    | 2070 | NaN  | <b>2070</b>   |
| CHCHD2   | -0,205093 | -0,041577 | <b>-0,123335</b>  | 1463 | 1818 | <b>1640,5</b> |
| TNKS     | 0,209348  | -0,455577 | <b>-0,1231145</b> | 1712 | 2215 | <b>1963,5</b> |
| C12orf44 | 0,142556  | -0,388754 | <b>-0,123099</b>  | 1628 | 2025 | <b>1826,5</b> |
| DPYSL3   | -0,549487 | 0,303595  | <b>-0,122946</b>  | 1073 | 975  | <b>1024</b>   |
| TRAPPC6A | -0,122906 | NaN       | <b>-0,122906</b>  | 1776 | NaN  | <b>1776</b>   |
| POP7     | -0,496274 | 0,250555  | <b>-0,1228595</b> | 1414 | 1918 | <b>1666</b>   |
| USP39    | -1,234382 | 0,988766  | <b>-0,122808</b>  | 1218 | 1913 | <b>1565,5</b> |
| NAALADL2 | 0,20133   | -0,446861 | <b>-0,1227655</b> | 1088 | 1525 | <b>1306,5</b> |
| RABGGTA  | -0,867437 | 0,622197  | <b>-0,12262</b>   | 1962 | 1548 | <b>1755</b>   |
| ALOX12B  | -0,06856  | -0,176626 | <b>-0,122593</b>  | 1714 | 1984 | <b>1849</b>   |
| POLG     | 0,236268  | -0,48139  | <b>-0,122561</b>  | 1389 | 1827 | <b>1608</b>   |
| TTC1     | -0,121806 | NaN       | <b>-0,121806</b>  | 1401 | NaN  | <b>1401</b>   |
| TRIML2   | -0,121511 | NaN       | <b>-0,121511</b>  | 1479 | NaN  | <b>1479</b>   |
| PLCXD3   | -0,113573 | -0,129433 | <b>-0,121503</b>  | 1555 | 1666 | <b>1610,5</b> |
| KCTD20   | 0,171031  | -0,413992 | <b>-0,1214805</b> | 1754 | 2485 | <b>2119,5</b> |
| ASGR2    | -0,880009 | 0,637891  | <b>-0,121059</b>  | 1564 | 2283 | <b>1923,5</b> |
| ZNF320   | -0,095773 | -0,145961 | <b>-0,120867</b>  | 1355 | 1959 | <b>1657</b>   |
| C16orf5  | 0,178466  | -0,419157 | <b>-0,1203455</b> | 1518 | 2344 | <b>1931</b>   |
| PEX12    | -0,396039 | 0,155488  | <b>-0,1202755</b> | 2513 | 1553 | <b>2033</b>   |
| FAM71A   | 0,72904   | -0,968871 | <b>-0,1199155</b> | 1770 | 2151 | <b>1960,5</b> |
| TWF1     | 0,153042  | -0,392462 | <b>-0,11971</b>   | 2461 | 2363 | <b>2412</b>   |
| TADA3    | -0,131276 | -0,107941 | <b>-0,1196085</b> | 1364 | 1655 | <b>1509,5</b> |
| HSPB1    | -0,119586 | NaN       | <b>-0,119586</b>  | 1304 | NaN  | <b>1304</b>   |
| KRTAP9-3 | 0,055445  | -0,294277 | <b>-0,119416</b>  | 1599 | 1826 | <b>1712,5</b> |
| KRT12    | -0,834179 | 0,595445  | <b>-0,119367</b>  | 2000 | 1825 | <b>1912,5</b> |
| ADAMTSL2 | -0,119359 | NaN       | <b>-0,119359</b>  | 1057 | NaN  | <b>1057</b>   |
| WDR91    | -0,119309 | NaN       | <b>-0,119309</b>  | 1475 | NaN  | <b>1475</b>   |

|          |           |           |                   |      |      |               |
|----------|-----------|-----------|-------------------|------|------|---------------|
| TENC1    | -0,393273 | 0,155316  | <b>-0,1189785</b> | 1569 | 1767 | <b>1668</b>   |
| TMEM80   | -0,118898 | NaN       | <b>-0,118898</b>  | 1912 | NaN  | <b>1912</b>   |
| ISCU     | -0,280858 | 0,043476  | <b>-0,118691</b>  | 1174 | 1905 | <b>1539,5</b> |
| ZNF571   | -0,303999 | 0,06684   | <b>-0,1185795</b> | 1546 | 3246 | <b>2396</b>   |
| DNAH9    | -0,689028 | 0,452281  | <b>-0,1183735</b> | 1492 | 2249 | <b>1870,5</b> |
| THAP5    | 0,12527   | -0,362013 | <b>-0,1183715</b> | 1615 | 2364 | <b>1989,5</b> |
| IL1R2    | 0,250447  | -0,487005 | <b>-0,118279</b>  | 1796 | 2168 | <b>1982</b>   |
| ZNF621   | -0,596121 | 0,35968   | <b>-0,1182205</b> | 1140 | 1542 | <b>1341</b>   |
| SLC39A8  | -0,36143  | 0,125594  | <b>-0,117918</b>  | 1744 | 2147 | <b>1945,5</b> |
| ZDHHC14  | 0,557116  | -0,79282  | <b>-0,117852</b>  | 1460 | 1999 | <b>1729,5</b> |
| SETD3    | -0,117832 | NaN       | <b>-0,117832</b>  | 1785 | NaN  | <b>1785</b>   |
| TOPORS   | -0,220127 | -0,014872 | <b>-0,1174995</b> | 1749 | 2545 | <b>2147</b>   |
| MLL2     | -0,088835 | -0,145899 | <b>-0,117367</b>  | 1736 | 2187 | <b>1961,5</b> |
| CEACAM5  | -0,592333 | 0,357865  | <b>-0,117234</b>  | 1959 | 2024 | <b>1991,5</b> |
| GTF2E2   | 0,192729  | -0,425172 | <b>-0,1162215</b> | 1582 | 1710 | <b>1646</b>   |
| EPB41    | -0,02824  | -0,203995 | <b>-0,1161175</b> | 1780 | 2168 | <b>1974</b>   |
| ALDH4A1  | 1,025528  | -1,257647 | <b>-0,1160595</b> | 555  | 1761 | <b>1158</b>   |
| MLN      | -0,602159 | 0,370328  | <b>-0,1159155</b> | 1306 | 1823 | <b>1564,5</b> |
| TMEM198  | 0,825125  | -1,05617  | <b>-0,1155225</b> | 1349 | 1628 | <b>1488,5</b> |
| TMEM37   | 0,250447  | -0,481155 | <b>-0,115354</b>  | 1543 | 1773 | <b>1658</b>   |
| FBXO21   | 0,497052  | -0,726651 | <b>-0,1147995</b> | 1489 | 3124 | <b>2306,5</b> |
| TNIP1    | -0,299698 | 0,070146  | <b>-0,114776</b>  | 1762 | 1561 | <b>1661,5</b> |
| SSNA1    | -0,114694 | NaN       | <b>-0,114694</b>  | 1148 | NaN  | <b>1148</b>   |
| CSRNP2   | -0,164623 | -0,064657 | <b>-0,11464</b>   | 1617 | 2667 | <b>2142</b>   |
| ACADM    | 0,345347  | -0,574571 | <b>-0,114612</b>  | 2080 | 2353 | <b>2216,5</b> |
| EYA2     | -0,824729 | 0,595995  | <b>-0,114367</b>  | 1869 | 2288 | <b>2078,5</b> |
| C12orf54 | -0,114334 | NaN       | <b>-0,114334</b>  | 1523 | NaN  | <b>1523</b>   |
| SOX18    | 0,290454  | -0,518497 | <b>-0,1140215</b> | 1263 | 1833 | <b>1548</b>   |
| LONRF2   | -0,041238 | -0,186555 | <b>-0,1138965</b> | 1008 | 1584 | <b>1296</b>   |
| RSAD2    | 0,412633  | -0,640354 | <b>-0,1138605</b> | 1488 | 1825 | <b>1656,5</b> |
| SPNS3    | -0,437032 | 0,209425  | <b>-0,1138035</b> | 1820 | 2054 | <b>1937</b>   |
| TXK      | -0,193095 | -0,034508 | <b>-0,1138015</b> | 1395 | 2022 | <b>1708,5</b> |
| TAF9B    | -0,924115 | 0,696535  | <b>-0,11379</b>   | 1144 | 2022 | <b>1583</b>   |
| HPSE2    | 0,992649  | -1,22018  | <b>-0,1137655</b> | 1656 | 2021 | <b>1838,5</b> |

|           |           |           |                   |      |      |               |
|-----------|-----------|-----------|-------------------|------|------|---------------|
| COX6A1    | 0,36707   | -0,59426  | <b>-0,113595</b>  | 1330 | 1931 | <b>1630,5</b> |
| EPHB4     | 0,154417  | -0,381591 | <b>-0,113587</b>  | 1610 | 2301 | <b>1955,5</b> |
| BAG6      | -0,018967 | -0,208148 | <b>-0,1135575</b> | 1805 | 1796 | <b>1800,5</b> |
| TUBB3     | -0,1135   | NaN       | <b>-0,1135</b>    | 1329 | NaN  | <b>1329</b>   |
| WDR47     | -0,113476 | NaN       | <b>-0,113476</b>  | 1698 | NaN  | <b>1698</b>   |
| UBLCP1    | -0,063762 | -0,162782 | <b>-0,113272</b>  | 2076 | 2329 | <b>2202,5</b> |
| TMEM200A  | 0,049479  | -0,275885 | <b>-0,113203</b>  | 1791 | 1698 | <b>1744,5</b> |
| VEGFC     | -1,287093 | 1,061024  | <b>-0,1130345</b> | 1733 | 1960 | <b>1846,5</b> |
| RUSC1-AS1 | -0,112813 | NaN       | <b>-0,112813</b>  | 1838 | NaN  | <b>1838</b>   |
| NRG2      | 0,149471  | -0,375051 | <b>-0,11279</b>   | 1574 | 1274 | <b>1424</b>   |
| TOMM40    | -0,193573 | -0,031982 | <b>-0,1127775</b> | 1513 | 2668 | <b>2090,5</b> |
| OSTCP1    | -0,377169 | 0,151702  | <b>-0,1127335</b> | 1768 | 2258 | <b>2013</b>   |
| TMEM66    | 0,443443  | -0,668725 | <b>-0,112641</b>  | 1895 | 2264 | <b>2079,5</b> |
| LST1      | -0,952339 | 0,727246  | <b>-0,1125465</b> | 1465 | 1870 | <b>1667,5</b> |
| CCDC15    | -0,112534 | NaN       | <b>-0,112534</b>  | 1899 | NaN  | <b>1899</b>   |
| KCNJ10    | -0,239186 | 0,014423  | <b>-0,1123815</b> | 1737 | 2514 | <b>2125,5</b> |
| RNF166    | -0,000104 | -0,224415 | <b>-0,1122595</b> | 1426 | 2078 | <b>1752</b>   |
| TAF10     | 0,59552   | -0,820029 | <b>-0,1122545</b> | 1108 | 1825 | <b>1466,5</b> |
| SART1     | 0,591578  | -0,815702 | <b>-0,112062</b>  | 1022 | 1751 | <b>1386,5</b> |
| GPATCH4   | -0,112007 | NaN       | <b>-0,112007</b>  | 1699 | NaN  | <b>1699</b>   |
| C4orf37   | 0,50113   | -0,724762 | <b>-0,111816</b>  | 1829 | 2198 | <b>2013,5</b> |
| COL9A3    | -0,506019 | 0,282587  | <b>-0,111716</b>  | 914  | 1533 | <b>1223,5</b> |
| SHC4      | -0,111193 | NaN       | <b>-0,111193</b>  | 1896 | NaN  | <b>1896</b>   |
| NSMCE1    | -0,331004 | 0,108731  | <b>-0,1111365</b> | 1955 | 1889 | <b>1922</b>   |
| SETX      | -0,111057 | NaN       | <b>-0,111057</b>  | 1827 | NaN  | <b>1827</b>   |
| KIAA0317  | -0,10972  | -0,112013 | <b>-0,1108665</b> | 1585 | 2554 | <b>2069,5</b> |
| C1QL3     | -0,479586 | 0,258339  | <b>-0,1106235</b> | 1914 | 2295 | <b>2104,5</b> |
| NCDN      | 0,088247  | -0,309304 | <b>-0,1105285</b> | 1563 | 1815 | <b>1689</b>   |
| H1FX      | 0,121029  | -0,341702 | <b>-0,1103365</b> | 1208 | 1356 | <b>1282</b>   |
| TMEM180   | -0,110311 | NaN       | <b>-0,110311</b>  | 1893 | NaN  | <b>1893</b>   |
| C6orf1    | 0,313838  | -0,5344   | <b>-0,110281</b>  | 972  | 1142 | <b>1057</b>   |
| C1orf51   | 0,45996   | -0,680341 | <b>-0,1101905</b> | 1614 | 1543 | <b>1578,5</b> |
| MYO7B     | -0,156689 | -0,06362  | <b>-0,1101545</b> | 1763 | 2212 | <b>1987,5</b> |
| TMEM82    | -0,109887 | NaN       | <b>-0,109887</b>  | 1167 | NaN  | <b>1167</b>   |

|          |           |           |                   |      |      |               |
|----------|-----------|-----------|-------------------|------|------|---------------|
| NOTCH1   | 0,141151  | -0,360616 | <b>-0,1097325</b> | 2205 | 2499 | <b>2352</b>   |
| TECTB    | -0,109919 | -0,109134 | <b>-0,1095265</b> | 1705 | 1859 | <b>1782</b>   |
| OR4K5    | -0,401954 | 0,183281  | <b>-0,1093365</b> | 1060 | 1527 | <b>1293,5</b> |
| NMD3     | -0,109173 | NaN       | <b>-0,109173</b>  | 2049 | NaN  | <b>2049</b>   |
| CHIA     | 0,150669  | -0,368441 | <b>-0,108886</b>  | 1614 | 1834 | <b>1724</b>   |
| ENO1     | -0,215329 | -0,002018 | <b>-0,1086735</b> | 1558 | 2517 | <b>2037,5</b> |
| AFP      | 0,39248   | -0,609295 | <b>-0,1084075</b> | 1179 | 1948 | <b>1563,5</b> |
| HCG27    | 0,159765  | -0,37596  | <b>-0,1080975</b> | 1279 | 1631 | <b>1455</b>   |
| BUB3     | -0,301426 | 0,086185  | <b>-0,1076205</b> | 1412 | 1879 | <b>1645,5</b> |
| PKHD1L1  | 0,648376  | -0,862802 | <b>-0,107213</b>  | 1513 | 1383 | <b>1448</b>   |
| C7orf26  | 0,435109  | -0,649399 | <b>-0,107145</b>  | 1748 | 2118 | <b>1933</b>   |
| MAP1A    | 0,264723  | -0,478998 | <b>-0,1071375</b> | 1769 | 3391 | <b>2580</b>   |
| HRH3     | -0,107073 | NaN       | <b>-0,107073</b>  | 2091 | NaN  | <b>2091</b>   |
| PHPT1    | -0,199451 | -0,014462 | <b>-0,1069565</b> | 1336 | 2096 | <b>1716</b>   |
| ACOX1    | 0,319209  | -0,532968 | <b>-0,1068795</b> | 1494 | 2270 | <b>1882</b>   |
| VPS37B   | 0,08267   | -0,295435 | <b>-0,1063825</b> | 1859 | 2311 | <b>2085</b>   |
| CDH22    | 0,098795  | -0,311501 | <b>-0,106353</b>  | 1334 | 1776 | <b>1555</b>   |
| TBC1D2   | -0,106302 | NaN       | <b>-0,106302</b>  | 1456 | NaN  | <b>1456</b>   |
| ABCB11   | 0,080742  | -0,293229 | <b>-0,1062435</b> | 1568 | 2592 | <b>2080</b>   |
| ZFYVE20  | -0,016207 | -0,195932 | <b>-0,1060695</b> | 1567 | 1987 | <b>1777</b>   |
| XRCC4    | -0,36865  | 0,15675   | <b>-0,10595</b>   | 1668 | 2108 | <b>1888</b>   |
| METTL4   | 0,475882  | -0,687652 | <b>-0,105885</b>  | 1423 | 1955 | <b>1689</b>   |
| SLC41A1  | -0,490707 | 0,278958  | <b>-0,1058745</b> | 1651 | 2295 | <b>1973</b>   |
| C4orf34  | 0,063593  | -0,27496  | <b>-0,1056835</b> | 1280 | 1490 | <b>1385</b>   |
| RHBDD3   | -0,105623 | NaN       | <b>-0,105623</b>  | 1337 | NaN  | <b>1337</b>   |
| B3GALNT2 | NaN       | -0,105511 | <b>-0,105511</b>  | NaN  | 2350 | <b>2350</b>   |
| EMCN     | -0,1055   | -0,105449 | <b>-0,1054745</b> | 1800 | 2392 | <b>2096</b>   |
| ACTR1A   | -0,990689 | 0,779773  | <b>-0,105458</b>  | 1464 | 1510 | <b>1487</b>   |
| VSIG1    | -0,450809 | 0,240309  | <b>-0,10525</b>   | 2045 | 2460 | <b>2252,5</b> |
| GBF1     | 0,272384  | -0,482745 | <b>-0,1051805</b> | 1281 | 1841 | <b>1561</b>   |
| OR6C75   | 0,027906  | -0,238189 | <b>-0,1051415</b> | 1592 | 2018 | <b>1805</b>   |
| PIGA     | -0,507683 | 0,297861  | <b>-0,104911</b>  | 2010 | 2155 | <b>2082,5</b> |
| RAB7A    | -0,605177 | 0,395699  | <b>-0,104739</b>  | 1543 | 1548 | <b>1545,5</b> |
| WDR69    | -0,104644 | NaN       | <b>-0,104644</b>  | 1441 | NaN  | <b>1441</b>   |

|          |           |           |                   |      |      |               |
|----------|-----------|-----------|-------------------|------|------|---------------|
| GNPTAB   | -0,104525 | NaN       | <b>-0,104525</b>  | 1946 | NaN  | <b>1946</b>   |
| UST      | -0,055276 | -0,152852 | <b>-0,104064</b>  | 1343 | 1549 | <b>1446</b>   |
| KRTAP6-2 | -0,348571 | 0,140537  | <b>-0,104017</b>  | 1787 | 1959 | <b>1873</b>   |
| PPP6R3   | -0,10398  | NaN       | <b>-0,10398</b>   | 1960 | NaN  | <b>1960</b>   |
| FAM159A  | -0,574929 | 0,36699   | <b>-0,1039695</b> | 1681 | 2092 | <b>1886,5</b> |
| HUS1B    | -0,129246 | -0,078664 | <b>-0,103955</b>  | 1498 | 2103 | <b>1800,5</b> |
| ZNF429   | 0,169785  | -0,377384 | <b>-0,1037995</b> | 1130 | 2006 | <b>1568</b>   |
| RABL5    | -0,492309 | 0,285041  | <b>-0,103634</b>  | 1610 | 1852 | <b>1731</b>   |
| OR5AC2   | 0,03422   | -0,241379 | <b>-0,1035795</b> | 1538 | 1956 | <b>1747</b>   |
| RHOB     | 0,489562  | -0,696525 | <b>-0,1034815</b> | 1940 | 2010 | <b>1975</b>   |
| SLC25A16 | -0,638822 | 0,432003  | <b>-0,1034095</b> | 1326 | 2267 | <b>1796,5</b> |
| NEUROD1  | 0,466525  | -0,672839 | <b>-0,103157</b>  | 1778 | 1716 | <b>1747</b>   |
| SKP2     | -0,338935 | 0,132728  | <b>-0,1031035</b> | 956  | 1549 | <b>1252,5</b> |
| TMED9    | -0,196964 | -0,008919 | <b>-0,1029415</b> | 1872 | 2127 | <b>1999,5</b> |
| CUL2     | 0,193006  | -0,398624 | <b>-0,102809</b>  | 1658 | 1781 | <b>1719,5</b> |
| OSBPL5   | -0,28875  | 0,083707  | <b>-0,1025215</b> | 1636 | 1898 | <b>1767</b>   |
| MYF5     | -0,513648 | 0,308953  | <b>-0,1023475</b> | 1945 | 1787 | <b>1866</b>   |
| CLCC1    | -0,277813 | 0,073636  | <b>-0,1020885</b> | 2103 | 3140 | <b>2621,5</b> |
| PGR      | 0,591291  | -0,794951 | <b>-0,10183</b>   | 1325 | 1844 | <b>1584,5</b> |
| PTPRB    | 0,029336  | -0,23299  | <b>-0,101827</b>  | 1602 | 2674 | <b>2138</b>   |
| GUCY2D   | -0,0695   | -0,132638 | <b>-0,101069</b>  | 1221 | 1587 | <b>1404</b>   |
| GRM4     | -0,100884 | NaN       | <b>-0,100884</b>  | 1364 | NaN  | <b>1364</b>   |
| WDR83    | 0,806834  | -1,008259 | <b>-0,1007125</b> | 1886 | 1911 | <b>1898,5</b> |
| TMED6    | 0,325887  | -0,526685 | <b>-0,100399</b>  | 1629 | 2150 | <b>1889,5</b> |
| MAPT     | -0,618741 | 0,417984  | <b>-0,1003785</b> | 1649 | 1697 | <b>1673</b>   |
| NTF3     | 1,136624  | -1,337316 | <b>-0,100346</b>  | 1658 | 2653 | <b>2155,5</b> |
| METTL11A | -0,100295 | NaN       | <b>-0,100295</b>  | 1460 | NaN  | <b>1460</b>   |
| PLEKHA5  | -0,669596 | 0,469282  | <b>-0,100157</b>  | 1461 | 1998 | <b>1729,5</b> |
| RHOG     | NaN       | -0,100059 | <b>-0,100059</b>  | NaN  | 2310 | <b>2310</b>   |
| ARSD     | -0,360818 | 0,160785  | <b>-0,1000165</b> | 1509 | 2128 | <b>1818,5</b> |
| C16orf45 | -0,266249 | 0,066348  | <b>-0,0999505</b> | 2125 | 2245 | <b>2185</b>   |
| LOX      | -0,22346  | 0,02457   | <b>-0,099445</b>  | 1870 | 2175 | <b>2022,5</b> |
| FGF16    | -0,166581 | -0,032033 | <b>-0,099307</b>  | 1621 | 2127 | <b>1874</b>   |
| IGBP1    | -0,19371  | -0,004549 | <b>-0,0991295</b> | 1618 | 2026 | <b>1822</b>   |

|           |           |           |                   |      |      |               |
|-----------|-----------|-----------|-------------------|------|------|---------------|
| RAD51AP1  | -0,099118 | NaN       | <b>-0,099118</b>  | 1500 | NaN  | <b>1500</b>   |
| IFT74     | -0,022761 | -0,175449 | <b>-0,099105</b>  | 1866 | 2278 | <b>2072</b>   |
| SLC25A34  | -0,41722  | 0,219107  | <b>-0,0990565</b> | 1305 | 1487 | <b>1396</b>   |
| C20orf152 | -0,339328 | 0,141828  | <b>-0,09875</b>   | 1460 | 1734 | <b>1597</b>   |
| RPTOR     | -0,098656 | NaN       | <b>-0,098656</b>  | 1659 | NaN  | <b>1659</b>   |
| COMMD4    | -0,520743 | 0,323808  | <b>-0,0984675</b> | 1501 | 1212 | <b>1356,5</b> |
| JRKL      | 0,526358  | -0,723051 | <b>-0,0983465</b> | 1517 | 1560 | <b>1538,5</b> |
| MRPL51    | -0,098235 | NaN       | <b>-0,098235</b>  | 1700 | NaN  | <b>1700</b>   |
| CAPN3     | 0,136043  | -0,331332 | <b>-0,0976445</b> | 1606 | 2172 | <b>1889</b>   |
| C15orf58  | -1,213175 | 1,018072  | <b>-0,0975515</b> | 1245 | 2023 | <b>1634</b>   |
| NRG4      | 0,584216  | -0,779146 | <b>-0,097465</b>  | 1853 | 1938 | <b>1895,5</b> |
| PSMG1     | -0,970602 | 0,775777  | <b>-0,0974125</b> | 1513 | 1865 | <b>1689</b>   |
| FAM3A     | 0,264231  | -0,458827 | <b>-0,097298</b>  | 984  | 2092 | <b>1538</b>   |
| FAM110B   | -0,09714  | NaN       | <b>-0,09714</b>   | 1557 | NaN  | <b>1557</b>   |
| INTS3     | -0,395403 | 0,201608  | <b>-0,0968975</b> | 1701 | 2769 | <b>2235</b>   |
| GIPR      | -0,096866 | NaN       | <b>-0,096866</b>  | 1566 | NaN  | <b>1566</b>   |
| POLN      | -0,309745 | 0,116462  | <b>-0,0966415</b> | 1298 | 1880 | <b>1589</b>   |
| MYBPC2    | -0,148189 | -0,044995 | <b>-0,096592</b>  | 1349 | 1678 | <b>1513,5</b> |
| CEP72     | 0,11147   | -0,304586 | <b>-0,096558</b>  | 1909 | 2953 | <b>2431</b>   |
| HAUS6     | -0,096485 | NaN       | <b>-0,096485</b>  | 1498 | NaN  | <b>1498</b>   |
| CYP2R1    | 0,235181  | -0,428009 | <b>-0,096414</b>  | 1772 | 1924 | <b>1848</b>   |
| DNAJC4    | 0,84158   | -1,033909 | <b>-0,0961645</b> | 1132 | 1977 | <b>1554,5</b> |
| STK32C    | -0,125927 | -0,065815 | <b>-0,095871</b>  | 1625 | 2025 | <b>1825</b>   |
| STYK1     | -0,568264 | 0,376553  | <b>-0,0958555</b> | 1993 | 2357 | <b>2175</b>   |
| SRC       | -0,03374  | -0,157916 | <b>-0,095828</b>  | 1907 | 1985 | <b>1946</b>   |
| JAM2      | -0,628205 | 0,437876  | <b>-0,0951645</b> | 1575 | 1500 | <b>1537,5</b> |
| BBS10     | -0,094943 | NaN       | <b>-0,094943</b>  | 1970 | NaN  | <b>1970</b>   |
| ENTPD6    | -0,270904 | 0,081204  | <b>-0,09485</b>   | 1987 | 2281 | <b>2134</b>   |
| ICK       | 0,191739  | -0,381283 | <b>-0,094772</b>  | 1546 | 2079 | <b>1812,5</b> |
| SHBG      | -0,094729 | NaN       | <b>-0,094729</b>  | 1590 | NaN  | <b>1590</b>   |
| CTSF      | 0,828377  | -1,01777  | <b>-0,0946965</b> | 1469 | 1694 | <b>1581,5</b> |
| ALOX5AP   | 0,230962  | -0,420351 | <b>-0,0946945</b> | 1614 | 1894 | <b>1754</b>   |
| GZMM      | -0,424253 | 0,235021  | <b>-0,094616</b>  | 918  | 1331 | <b>1124,5</b> |
| CNN1      | 0,219792  | -0,408957 | <b>-0,0945825</b> | 1449 | 1615 | <b>1532</b>   |

|          |           |           |                   |      |      |               |
|----------|-----------|-----------|-------------------|------|------|---------------|
| EDEM1    | -0,964678 | 0,775668  | <b>-0,094505</b>  | 2120 | 2277 | <b>2198,5</b> |
| NDRG4    | -0,267894 | 0,078952  | <b>-0,094471</b>  | 1453 | 1964 | <b>1708,5</b> |
| C4orf26  | -0,094461 | NaN       | <b>-0,094461</b>  | 1482 | NaN  | <b>1482</b>   |
| ZNF384   | -0,093484 | -0,095438 | <b>-0,094461</b>  | 997  | 1973 | <b>1485</b>   |
| OR12D3   | -0,600125 | 0,41132   | <b>-0,0944025</b> | 1658 | 2742 | <b>2200</b>   |
| GATSL3   | 0,201967  | -0,390365 | <b>-0,094199</b>  | 1530 | 2224 | <b>1877</b>   |
| ABCD4    | 0,132189  | -0,320134 | <b>-0,0939725</b> | 1420 | 1832 | <b>1626</b>   |
| MEX3D    | -0,004853 | -0,183044 | <b>-0,0939485</b> | 1727 | 2725 | <b>2226</b>   |
| CBLL1    | -0,161934 | -0,025895 | <b>-0,0939145</b> | 1632 | 2302 | <b>1967</b>   |
| RNF185   | -0,043812 | -0,143865 | <b>-0,0938385</b> | 1946 | 3005 | <b>2475,5</b> |
| WBSCR27  | 0,408246  | -0,595535 | <b>-0,0936445</b> | 1111 | 1653 | <b>1382</b>   |
| SFT2D1   | -0,09341  | NaN       | <b>-0,09341</b>   | 2008 | NaN  | <b>2008</b>   |
| DHDH     | -0,616942 | 0,430539  | <b>-0,0932015</b> | 2092 | 2284 | <b>2188</b>   |
| GPR31    | -0,093178 | NaN       | <b>-0,093178</b>  | 793  | NaN  | <b>793</b>    |
| RNF207   | -0,183141 | -0,003208 | <b>-0,0931745</b> | 1619 | 1925 | <b>1772</b>   |
| FASN     | -0,311695 | 0,125763  | <b>-0,092966</b>  | 1797 | 2085 | <b>1941</b>   |
| GCNT1    | 0,21721   | -0,402932 | <b>-0,092861</b>  | 1859 | 1866 | <b>1862,5</b> |
| CMYA5    | -0,154373 | -0,030762 | <b>-0,0925675</b> | 1787 | 2400 | <b>2093,5</b> |
| EBP      | -0,443355 | 0,259063  | <b>-0,092146</b>  | 1872 | 1942 | <b>1907</b>   |
| KRT40    | -0,798565 | 0,614338  | <b>-0,0921135</b> | 1641 | 1852 | <b>1746,5</b> |
| MMP17    | -0,971171 | 0,787194  | <b>-0,0919885</b> | 2152 | 2145 | <b>2148,5</b> |
| ANKRD44  | 0,36093   | -0,544897 | <b>-0,0919835</b> | 1865 | 2025 | <b>1945</b>   |
| HECTD1   | -0,075853 | -0,108079 | <b>-0,091966</b>  | 2164 | 3063 | <b>2613,5</b> |
| DEFB124  | 0,683446  | -0,867254 | <b>-0,091904</b>  | 1034 | 2155 | <b>1594,5</b> |
| IL6ST    | 0,097683  | -0,281357 | <b>-0,091837</b>  | 2019 | 2793 | <b>2406</b>   |
| TLCD1    | -0,091728 | NaN       | <b>-0,091728</b>  | 1885 | NaN  | <b>1885</b>   |
| PYY      | -0,065949 | -0,117436 | <b>-0,0916925</b> | 1469 | 1441 | <b>1455</b>   |
| C13orf33 | -0,081768 | -0,101545 | <b>-0,0916565</b> | 1661 | 2418 | <b>2039,5</b> |
| CLUAP1   | 0,144997  | -0,328304 | <b>-0,0916535</b> | 1971 | 2686 | <b>2328,5</b> |
| SFTA2    | -0,162372 | -0,020063 | <b>-0,0912175</b> | 1343 | 1711 | <b>1527</b>   |
| CAPN5    | -0,475191 | 0,292781  | <b>-0,091205</b>  | 1541 | 1412 | <b>1476,5</b> |
| ZNF34    | -0,090917 | NaN       | <b>-0,090917</b>  | 1760 | NaN  | <b>1760</b>   |
| MPDZ     | -0,175945 | -0,00572  | <b>-0,0908325</b> | 1700 | 2033 | <b>1866,5</b> |
| C3orf27  | 0,16369   | -0,345184 | <b>-0,090747</b>  | 2024 | 2340 | <b>2182</b>   |



|           |           |           |                   |      |      |               |
|-----------|-----------|-----------|-------------------|------|------|---------------|
| MYOM1     | -0,125071 | -0,056184 | <b>-0,0906275</b> | 1624 | 1743 | <b>1683,5</b> |
| CHCHD5    | 0,281864  | -0,462397 | <b>-0,0902665</b> | 1569 | 1921 | <b>1745</b>   |
| S100P     | -0,359654 | 0,179138  | <b>-0,090258</b>  | 1509 | 1385 | <b>1447</b>   |
| EZH1      | -0,777491 | 0,598056  | <b>-0,0897175</b> | 1824 | 1911 | <b>1867,5</b> |
| DMPK      | -0,416155 | 0,237528  | <b>-0,0893135</b> | 756  | 1433 | <b>1094,5</b> |
| ITPRIPL2  | -1,066181 | 0,887964  | <b>-0,0891085</b> | 1830 | 2947 | <b>2388,5</b> |
| ITGB6     | 0,205188  | -0,383265 | <b>-0,0890385</b> | 1265 | 1774 | <b>1519,5</b> |
| ANKIB1    | 0,091278  | -0,269235 | <b>-0,0889785</b> | 1637 | 2635 | <b>2136</b>   |
| NONO      | -0,088654 | NaN       | <b>-0,088654</b>  | 1734 | NaN  | <b>1734</b>   |
| PCDHGA7   | 0,010191  | -0,187387 | <b>-0,088598</b>  | 1957 | 1528 | <b>1742,5</b> |
| TSSK4     | -0,067858 | -0,109108 | <b>-0,088483</b>  | 1449 | 2199 | <b>1824</b>   |
| ELSPBP1   | 0,348297  | -0,524898 | <b>-0,0883005</b> | 1208 | 1481 | <b>1344,5</b> |
| C9orf135  | 0,011298  | -0,187602 | <b>-0,088152</b>  | 1482 | 1747 | <b>1614,5</b> |
| GNGT2     | 0,087803  | -0,263375 | <b>-0,087786</b>  | 1625 | 1712 | <b>1668,5</b> |
| PLK3      | -0,310742 | 0,135961  | <b>-0,0873905</b> | 1933 | 2279 | <b>2106</b>   |
| LEKR1     | -0,087351 | NaN       | <b>-0,087351</b>  | 1665 | NaN  | <b>1665</b>   |
| MINA      | -0,087313 | NaN       | <b>-0,087313</b>  | 1764 | NaN  | <b>1764</b>   |
| FAM83B    | 0,48323   | -0,657483 | <b>-0,0871265</b> | 1943 | 2142 | <b>2042,5</b> |
| ZNF335    | 0,135626  | -0,309781 | <b>-0,0870775</b> | 1355 | 1678 | <b>1516,5</b> |
| BFSP2     | 0,571125  | -0,744817 | <b>-0,086846</b>  | 1601 | 1907 | <b>1754</b>   |
| MCM3AP    | -0,23036  | 0,056808  | <b>-0,086776</b>  | 2027 | 1980 | <b>2003,5</b> |
| C19orf39  | -0,086696 | NaN       | <b>-0,086696</b>  | 1672 | NaN  | <b>1672</b>   |
| GAL3ST3   | -0,189267 | 0,016833  | <b>-0,086217</b>  | 1440 | 2036 | <b>1738</b>   |
| UTP18     | 0,196763  | -0,368904 | <b>-0,0860705</b> | 1271 | 1441 | <b>1356</b>   |
| SLC2A5    | 0,490784  | -0,662491 | <b>-0,0858535</b> | 1923 | 2383 | <b>2153</b>   |
| GOLGA7B   | -0,08584  | NaN       | <b>-0,08584</b>   | 1557 | NaN  | <b>1557</b>   |
| ATIC      | -0,145232 | -0,026425 | <b>-0,0858285</b> | 1116 | 1985 | <b>1550,5</b> |
| C22orf25  | -0,043765 | -0,127843 | <b>-0,085804</b>  | 1661 | 1637 | <b>1649</b>   |
| ANKRD29   | -0,503894 | 0,332876  | <b>-0,085509</b>  | 1462 | 1656 | <b>1559</b>   |
| RGS9BP    | -0,550655 | 0,379769  | <b>-0,085443</b>  | 1974 | 3066 | <b>2520</b>   |
| MAP1S     | -0,263035 | 0,092442  | <b>-0,0852965</b> | 1735 | 1892 | <b>1813,5</b> |
| TMPRSS11E | 0,249542  | -0,420013 | <b>-0,0852355</b> | 1297 | 2494 | <b>1895,5</b> |
| SCRN1     | 0,094077  | -0,264141 | <b>-0,085032</b>  | 1668 | 2332 | <b>2000</b>   |
| AK1       | 1,081641  | -1,251301 | <b>-0,08483</b>   | 1731 | 1987 | <b>1859</b>   |

|          |           |           |                   |      |      |               |
|----------|-----------|-----------|-------------------|------|------|---------------|
| IRAK2    | 0,018202  | -0,187811 | <b>-0,0848045</b> | 1783 | 2164 | <b>1973,5</b> |
| RPN1     | -0,246585 | 0,077155  | <b>-0,084715</b>  | 1417 | 1754 | <b>1585,5</b> |
| ZADH2    | 0,284499  | -0,453912 | <b>-0,0847065</b> | 1862 | 1790 | <b>1826</b>   |
| MOK      | -0,095084 | -0,074225 | <b>-0,0846545</b> | 1947 | 2346 | <b>2146,5</b> |
| ITGB8    | -0,423325 | 0,255231  | <b>-0,084047</b>  | 1862 | 1996 | <b>1929</b>   |
| FGF3     | -0,069725 | -0,097769 | <b>-0,083747</b>  | 1907 | 2562 | <b>2234,5</b> |
| CHEK2    | -0,006726 | -0,15993  | <b>-0,083328</b>  | 1344 | 2038 | <b>1691</b>   |
| WDR74    | -0,083237 | NaN       | <b>-0,083237</b>  | 1519 | NaN  | <b>1519</b>   |
| DNASE1   | 0,290995  | -0,456375 | <b>-0,08269</b>   | 1845 | 1852 | <b>1848,5</b> |
| RBL1     | -0,508956 | 0,344179  | <b>-0,0823885</b> | 1942 | 2628 | <b>2285</b>   |
| C3orf54  | -0,082274 | NaN       | <b>-0,082274</b>  | 1824 | NaN  | <b>1824</b>   |
| PTPN21   | 1,169403  | -1,333793 | <b>-0,082195</b>  | 2069 | 2250 | <b>2159,5</b> |
| CCNT2    | 1,156232  | -1,320104 | <b>-0,081936</b>  | 1259 | 1895 | <b>1577</b>   |
| FAS      | -0,111199 | -0,052657 | <b>-0,081928</b>  | 1252 | 1772 | <b>1512</b>   |
| ZNF546   | 0,0541    | -0,217889 | <b>-0,0818945</b> | 1211 | 1664 | <b>1437,5</b> |
| WNK4     | 0,885716  | -1,04871  | <b>-0,081497</b>  | 2029 | 1981 | <b>2005</b>   |
| RASA3    | 0,318106  | -0,480919 | <b>-0,0814065</b> | 1957 | 2257 | <b>2107</b>   |
| ANGPT4   | 0,074172  | -0,236965 | <b>-0,0813965</b> | 1560 | 2030 | <b>1795</b>   |
| NOD2     | 1,019965  | -1,182221 | <b>-0,081128</b>  | 1537 | 2117 | <b>1827</b>   |
| VMO1     | 0,191136  | -0,353225 | <b>-0,0810445</b> | 1687 | 1888 | <b>1787,5</b> |
| MDM2     | 0,826903  | -0,987592 | <b>-0,0803445</b> | 1524 | 2452 | <b>1988</b>   |
| TTC9B    | -0,619689 | 0,459019  | <b>-0,080335</b>  | 1619 | 1815 | <b>1717</b>   |
| SULT1C4  | -0,697522 | 0,53715   | <b>-0,080186</b>  | 1138 | 1297 | <b>1217,5</b> |
| C9orf68  | -0,640637 | 0,480457  | <b>-0,08009</b>   | 1161 | 1948 | <b>1554,5</b> |
| SULT1E1  | -1,427983 | 1,268048  | <b>-0,0799675</b> | 1299 | 2007 | <b>1653</b>   |
| ATF1     | 0,423884  | -0,583498 | <b>-0,079807</b>  | 1412 | 1898 | <b>1655</b>   |
| DGKI     | -0,540495 | 0,38094   | <b>-0,0797775</b> | 1562 | 1515 | <b>1538,5</b> |
| ZFAND5   | -0,031988 | -0,126789 | <b>-0,0793885</b> | 372  | 1934 | <b>1153</b>   |
| APOBEC3G | 0,161999  | -0,320598 | <b>-0,0792995</b> | 1796 | 1675 | <b>1735,5</b> |
| ISLR2    | -0,079229 | NaN       | <b>-0,079229</b>  | 1568 | NaN  | <b>1568</b>   |
| GABRB2   | 0,120541  | -0,278894 | <b>-0,0791765</b> | 1396 | 1918 | <b>1657</b>   |
| ZNF706   | -0,079163 | NaN       | <b>-0,079163</b>  | 2034 | NaN  | <b>2034</b>   |
| NEURL2   | -0,166542 | 0,008375  | <b>-0,0790835</b> | 1333 | 2589 | <b>1961</b>   |
| ALDH3A2  | 0,293255  | -0,450728 | <b>-0,0787365</b> | 1788 | 2369 | <b>2078,5</b> |

|          |           |           |                   |      |      |               |
|----------|-----------|-----------|-------------------|------|------|---------------|
| ADAD1    | 0,097374  | -0,254631 | <b>-0,0786285</b> | 1572 | 2334 | <b>1953</b>   |
| ZSCAN5A  | 0,013588  | -0,170703 | <b>-0,0785575</b> | 1486 | 2046 | <b>1766</b>   |
| RPL7L1   | 0,031576  | -0,187984 | <b>-0,078204</b>  | 2274 | 2205 | <b>2239,5</b> |
| MTRF1L   | 0,17966   | -0,335597 | <b>-0,0779685</b> | 1335 | 2231 | <b>1783</b>   |
| SETD4    | -0,389356 | 0,233884  | <b>-0,077736</b>  | 1453 | 1232 | <b>1342,5</b> |
| RCBTB2   | -0,077403 | NaN       | <b>-0,077403</b>  | 2089 | NaN  | <b>2089</b>   |
| TIMP4    | -0,077355 | NaN       | <b>-0,077355</b>  | 1729 | NaN  | <b>1729</b>   |
| EIF6     | -0,361389 | 0,206713  | <b>-0,077338</b>  | 1562 | 1758 | <b>1660</b>   |
| MOSC1    | -0,274089 | 0,119624  | <b>-0,0772325</b> | 1297 | 1869 | <b>1583</b>   |
| TMPPE    | 0,699061  | -0,853517 | <b>-0,077228</b>  | 1092 | 1067 | <b>1079,5</b> |
| SGPL1    | 0,802575  | -0,956555 | <b>-0,07699</b>   | 1022 | 2466 | <b>1744</b>   |
| FOX12    | 0,339969  | -0,493946 | <b>-0,0769885</b> | 1831 | 2536 | <b>2183,5</b> |
| LMX1A    | -0,346332 | 0,192959  | <b>-0,0766865</b> | 1548 | 2536 | <b>2042</b>   |
| GRB2     | 0,448938  | -0,601658 | <b>-0,07636</b>   | 1001 | 2019 | <b>1510</b>   |
| XIAP     | 0,000876  | -0,153258 | <b>-0,076191</b>  | 1448 | 2759 | <b>2103,5</b> |
| NFS1     | 0,182486  | -0,33459  | <b>-0,076052</b>  | 1216 | 1743 | <b>1479,5</b> |
| C10orf82 | -0,302123 | 0,15036   | <b>-0,0758815</b> | 1931 | 2405 | <b>2168</b>   |
| SSTR2    | -0,075752 | NaN       | <b>-0,075752</b>  | 1428 | NaN  | <b>1428</b>   |
| HMGB4    | 0,277001  | -0,428368 | <b>-0,0756835</b> | 1862 | 2029 | <b>1945,5</b> |
| SYT13    | -0,075458 | NaN       | <b>-0,075458</b>  | 1401 | NaN  | <b>1401</b>   |
| CDHR5    | -0,075091 | NaN       | <b>-0,075091</b>  | 1882 | NaN  | <b>1882</b>   |
| PHLDB1   | -0,056965 | -0,093194 | <b>-0,0750795</b> | 1817 | 2120 | <b>1968,5</b> |
| OR10G3   | -0,638435 | 0,48872   | <b>-0,0748575</b> | 1560 | 2542 | <b>2051</b>   |
| PDE10A   | -0,300564 | 0,151335  | <b>-0,0746145</b> | 1445 | 1640 | <b>1542,5</b> |
| B9D1     | 0,314318  | -0,463214 | <b>-0,074448</b>  | 1396 | 1480 | <b>1438</b>   |
| BIN1     | -0,033583 | -0,114981 | <b>-0,074282</b>  | 1286 | 2245 | <b>1765,5</b> |
| TAS2R46  | -0,160357 | 0,012519  | <b>-0,073919</b>  | 1656 | 2041 | <b>1848,5</b> |
| NXNL1    | 0,147279  | -0,294569 | <b>-0,073645</b>  | 1437 | 2020 | <b>1728,5</b> |
| OR4P4    | -1,152372 | 1,005224  | <b>-0,073574</b>  | 1700 | 2348 | <b>2024</b>   |
| XKR9     | -0,073489 | NaN       | <b>-0,073489</b>  | 1774 | NaN  | <b>1774</b>   |
| RAB9B    | 0,532357  | -0,679324 | <b>-0,0734835</b> | 1435 | 1528 | <b>1481,5</b> |
| PKDREJ   | -0,012208 | -0,134506 | <b>-0,073357</b>  | 1478 | 2062 | <b>1770</b>   |
| PISD     | -0,155031 | 0,008442  | <b>-0,0732945</b> | 1614 | 2111 | <b>1862,5</b> |
| NF2      | -0,247214 | 0,10113   | <b>-0,073042</b>  | 1473 | 1965 | <b>1719</b>   |

|          |           |           |                   |      |      |               |
|----------|-----------|-----------|-------------------|------|------|---------------|
| MS4A6A   | -0,073011 | NaN       | <b>-0,073011</b>  | 1493 | NaN  | <b>1493</b>   |
| SYNE1    | 0,806236  | -0,951976 | <b>-0,07287</b>   | 1354 | 1487 | <b>1420,5</b> |
| SPOP     | 0,019343  | -0,165081 | <b>-0,072869</b>  | 1523 | 1886 | <b>1704,5</b> |
| TSPAN14  | 0,446572  | -0,59218  | <b>-0,072804</b>  | 2059 | 1724 | <b>1891,5</b> |
| CPN1     | 1,199684  | -1,344901 | <b>-0,0726085</b> | 1668 | 2239 | <b>1953,5</b> |
| TDRD7    | -0,072518 | NaN       | <b>-0,072518</b>  | 1755 | NaN  | <b>1755</b>   |
| POP5     | 0,47257   | -0,616726 | <b>-0,072078</b>  | 1617 | 2024 | <b>1820,5</b> |
| SAR1B    | -0,502038 | 0,357996  | <b>-0,072021</b>  | 1272 | 1687 | <b>1479,5</b> |
| TCF25    | -0,072002 | NaN       | <b>-0,072002</b>  | 1206 | NaN  | <b>1206</b>   |
| COL9A2   | -0,208592 | 0,064955  | <b>-0,0718185</b> | 1550 | 2192 | <b>1871</b>   |
| MAN1A2   | 0,14962   | -0,2931   | <b>-0,07174</b>   | 1809 | 2511 | <b>2160</b>   |
| SIM1     | -0,546398 | 0,40303   | <b>-0,071684</b>  | 1834 | 2076 | <b>1955</b>   |
| NRCAM    | 0,419456  | -0,562358 | <b>-0,071451</b>  | 1425 | 2264 | <b>1844,5</b> |
| HSPD1    | 0,489221  | -0,631286 | <b>-0,0710325</b> | 1648 | 1983 | <b>1815,5</b> |
| DMBX1    | 0,474266  | -0,616266 | <b>-0,071</b>     | 1643 | 1936 | <b>1789,5</b> |
| COX4I2   | -0,3915   | 0,249698  | <b>-0,070901</b>  | 1522 | 1903 | <b>1712,5</b> |
| C17orf50 | -0,070887 | NaN       | <b>-0,070887</b>  | 1431 | NaN  | <b>1431</b>   |
| HMCN1    | 1,399272  | -1,540878 | <b>-0,070803</b>  | 1568 | 1919 | <b>1743,5</b> |
| VDAC1    | -0,39745  | 0,255903  | <b>-0,0707735</b> | 2290 | 2808 | <b>2549</b>   |
| WRAP73   | 1,460528  | -1,601522 | <b>-0,070497</b>  | 903  | 2073 | <b>1488</b>   |
| ARF4     | -0,267634 | 0,126724  | <b>-0,070455</b>  | 1777 | 2452 | <b>2114,5</b> |
| EGFR     | -0,246023 | 0,105153  | <b>-0,070435</b>  | 2181 | 2755 | <b>2468</b>   |
| ADAT2    | 0,598852  | -0,739646 | <b>-0,070397</b>  | 1738 | 2553 | <b>2145,5</b> |
| ANG      | -0,053314 | -0,086805 | <b>-0,0700595</b> | 869  | 1710 | <b>1289,5</b> |
| EPHX1    | -0,375654 | 0,235728  | <b>-0,069963</b>  | 2044 | 2455 | <b>2249,5</b> |
| LIN28A   | 0,245199  | -0,384642 | <b>-0,0697215</b> | 1906 | 1965 | <b>1935,5</b> |
| PIGM     | -0,493857 | 0,354556  | <b>-0,0696505</b> | 1443 | 2410 | <b>1926,5</b> |
| NCR3     | NaN       | -0,069435 | <b>-0,069435</b>  | NaN  | 2670 | <b>2670</b>   |
| HINFP    | -0,066724 | -0,072033 | <b>-0,0693785</b> | 1487 | 1623 | <b>1555</b>   |
| PPP2R5C  | -0,471935 | 0,333679  | <b>-0,069128</b>  | 2071 | 2141 | <b>2106</b>   |
| ADAM11   | -0,765849 | 0,627711  | <b>-0,069069</b>  | 1643 | 1474 | <b>1558,5</b> |
| CCL25    | -0,215352 | 0,077285  | <b>-0,0690335</b> | 2081 | 2350 | <b>2215,5</b> |
| TSPYL1   | -1,456064 | 1,318427  | <b>-0,0688185</b> | 1822 | 2089 | <b>1955,5</b> |
| C1QB     | 0,671572  | -0,809174 | <b>-0,068801</b>  | 1858 | 2020 | <b>1939</b>   |

|          |           |           |                   |      |      |               |
|----------|-----------|-----------|-------------------|------|------|---------------|
| PTPRO    | -0,001674 | -0,135925 | <b>-0,0687995</b> | 2333 | 2465 | <b>2399</b>   |
| EGR2     | 0,630417  | -0,767772 | <b>-0,0686775</b> | 1935 | 3171 | <b>2553</b>   |
| SLC5A1   | 0,063085  | -0,200426 | <b>-0,0686705</b> | 2239 | 2070 | <b>2154,5</b> |
| DEFB135  | 0,283919  | -0,421043 | <b>-0,068562</b>  | 1906 | 2115 | <b>2010,5</b> |
| ZNF625   | -0,068556 | NaN       | <b>-0,068556</b>  | 1103 | NaN  | <b>1103</b>   |
| LRIT2    | 0,46578   | -0,602729 | <b>-0,0684745</b> | 1353 | 1992 | <b>1672,5</b> |
| C1RL     | -0,3356   | 0,198989  | <b>-0,0683055</b> | 1336 | 1851 | <b>1593,5</b> |
| TMEM219  | -0,068053 | NaN       | <b>-0,068053</b>  | 1367 | NaN  | <b>1367</b>   |
| APLP2    | -0,117541 | -0,018315 | <b>-0,067928</b>  | 1193 | 1796 | <b>1494,5</b> |
| MLLT11   | -0,067915 | NaN       | <b>-0,067915</b>  | 1350 | NaN  | <b>1350</b>   |
| UBE2E3   | 0,318043  | -0,453797 | <b>-0,067877</b>  | 1468 | 2340 | <b>1904</b>   |
| LMAN1    | -0,646297 | 0,5118    | <b>-0,0672485</b> | 2041 | 1997 | <b>2019</b>   |
| KIAA1199 | -0,29599  | 0,16214   | <b>-0,066925</b>  | 1757 | 1215 | <b>1486</b>   |
| KLHDC2   | -0,066865 | NaN       | <b>-0,066865</b>  | 2050 | NaN  | <b>2050</b>   |
| MRPL49   | -0,066805 | NaN       | <b>-0,066805</b>  | 1593 | NaN  | <b>1593</b>   |
| CPEB3    | -0,176347 | 0,043292  | <b>-0,0665275</b> | 1380 | 2108 | <b>1744</b>   |
| TRIM54   | -0,217728 | 0,084807  | <b>-0,0664605</b> | 1283 | 1937 | <b>1610</b>   |
| ORC5     | 0,311115  | -0,443951 | <b>-0,066418</b>  | 1918 | 2713 | <b>2315,5</b> |
| DLD      | -0,016184 | -0,115921 | <b>-0,0660525</b> | 1387 | 1978 | <b>1682,5</b> |
| UBE2J1   | -0,830574 | 0,698784  | <b>-0,065895</b>  | 1031 | 1629 | <b>1330</b>   |
| CCDC64   | -0,065839 | NaN       | <b>-0,065839</b>  | 1655 | NaN  | <b>1655</b>   |
| DOCK7    | 0,494118  | -0,625721 | <b>-0,0658015</b> | 2441 | 2680 | <b>2560,5</b> |
| INTS2    | -0,039864 | -0,091646 | <b>-0,065755</b>  | 1622 | 1880 | <b>1751</b>   |
| SLC22A1  | -0,313455 | 0,182094  | <b>-0,0656805</b> | 1791 | 2431 | <b>2111</b>   |
| HAL      | -0,580645 | 0,449399  | <b>-0,065623</b>  | 897  | 1616 | <b>1256,5</b> |
| RNF169   | -0,519892 | 0,389035  | <b>-0,0654285</b> | 1748 | 2217 | <b>1982,5</b> |
| FDXR     | 0,265538  | -0,396294 | <b>-0,065378</b>  | 1606 | 2100 | <b>1853</b>   |
| KBTBD5   | -0,002251 | -0,128219 | <b>-0,065235</b>  | 1957 | 1891 | <b>1924</b>   |
| NDUFS3   | -0,848747 | 0,718385  | <b>-0,065181</b>  | 1417 | 1992 | <b>1704,5</b> |
| MOBK12A  | -0,517686 | 0,387388  | <b>-0,065149</b>  | 1449 | 1625 | <b>1537</b>   |
| INSL5    | 0,198497  | -0,328329 | <b>-0,064916</b>  | 1425 | 2832 | <b>2128,5</b> |
| CAPRIN1  | -0,079701 | -0,049672 | <b>-0,0646865</b> | 1413 | 2417 | <b>1915</b>   |
| HDHD1    | 0,475043  | -0,604293 | <b>-0,064625</b>  | 1458 | 2434 | <b>1946</b>   |
| EIF5     | 0,678405  | -0,807486 | <b>-0,0645405</b> | 1576 | 1690 | <b>1633</b>   |

|            |           |           |                   |      |      |               |
|------------|-----------|-----------|-------------------|------|------|---------------|
| OCIAD2     | -0,064482 | NaN       | <b>-0,064482</b>  | 1650 | NaN  | <b>1650</b>   |
| SIX2       | -0,413792 | 0,285312  | <b>-0,06424</b>   | 1516 | 1945 | <b>1730,5</b> |
| STAG3      | -0,011949 | -0,116314 | <b>-0,0641315</b> | 1260 | 1536 | <b>1398</b>   |
| SGPP1      | -0,846676 | 0,718454  | <b>-0,064111</b>  | 2313 | 2860 | <b>2586,5</b> |
| RMND1      | -0,064045 | NaN       | <b>-0,064045</b>  | 2009 | NaN  | <b>2009</b>   |
| MSTN       | 0,137644  | -0,265341 | <b>-0,0638485</b> | 2032 | 2750 | <b>2391</b>   |
| PAN3       | 0,464833  | -0,592325 | <b>-0,063746</b>  | 1684 | 1752 | <b>1718</b>   |
| CPM        | -0,652777 | 0,52535   | <b>-0,0637135</b> | 1256 | 1352 | <b>1304</b>   |
| MSR1       | NaN       | -0,063667 | <b>-0,063667</b>  | NaN  | 2343 | <b>2343</b>   |
| EVX1       | -0,671764 | 0,544868  | <b>-0,063448</b>  | 1686 | 1991 | <b>1838,5</b> |
| CEP76      | 0,139465  | -0,266352 | <b>-0,0634435</b> | 1841 | 2151 | <b>1996</b>   |
| C21orf59   | -0,385896 | 0,259234  | <b>-0,063331</b>  | 2079 | 2151 | <b>2115</b>   |
| KCND2      | 0,422719  | -0,549366 | <b>-0,0633235</b> | 1741 | 3033 | <b>2387</b>   |
| BATF       | 0,395323  | -0,521777 | <b>-0,063227</b>  | 1822 | 1927 | <b>1874,5</b> |
| PPP1R16A   | 0,073732  | -0,200148 | <b>-0,063208</b>  | 1642 | 2005 | <b>1823,5</b> |
| CIZ1       | -0,510483 | 0,384207  | <b>-0,063138</b>  | 1624 | 2211 | <b>1917,5</b> |
| SMC4       | -0,271728 | 0,145658  | <b>-0,063035</b>  | 925  | 1810 | <b>1367,5</b> |
| PQLC2      | -0,492491 | 0,3666    | <b>-0,0629455</b> | 1466 | 2094 | <b>1780</b>   |
| KCNG3      | 0,195634  | -0,321242 | <b>-0,062804</b>  | 1980 | 2040 | <b>2010</b>   |
| PSMB5      | 0,143804  | -0,26939  | <b>-0,062793</b>  | 800  | 1474 | <b>1137</b>   |
| SNX29      | -0,317363 | 0,192819  | <b>-0,062272</b>  | 1541 | 2278 | <b>1909,5</b> |
| GADD45GIP1 | 0,360659  | -0,484953 | <b>-0,062147</b>  | 1351 | 2259 | <b>1805</b>   |
| MOSPD2     | -0,225391 | 0,10147   | <b>-0,0619605</b> | 2069 | 2845 | <b>2457</b>   |
| IFRD2      | -0,51286  | 0,389023  | <b>-0,0619185</b> | 1261 | 1178 | <b>1219,5</b> |
| FOXQ1      | -0,288298 | 0,165161  | <b>-0,0615685</b> | 1384 | 1895 | <b>1639,5</b> |
| NENF       | -0,061441 | NaN       | <b>-0,061441</b>  | 890  | NaN  | <b>890</b>    |
| C9orf139   | 0,424446  | -0,547022 | <b>-0,061288</b>  | 1344 | 1516 | <b>1430</b>   |
| RASD2      | 0,311411  | -0,433798 | <b>-0,0611935</b> | 1440 | 1884 | <b>1662</b>   |
| UMPS       | 0,065512  | -0,187476 | <b>-0,060982</b>  | 1419 | 2718 | <b>2068,5</b> |
| IDH3A      | 0,308146  | -0,430109 | <b>-0,0609815</b> | 1203 | 2134 | <b>1668,5</b> |
| LBH        | 0,546077  | -0,667993 | <b>-0,060958</b>  | 852  | 2166 | <b>1509</b>   |
| PITX1      | -0,780885 | 0,659085  | <b>-0,0609</b>    | 2060 | 1835 | <b>1947,5</b> |
| GPT2       | 0,034218  | -0,155675 | <b>-0,0607285</b> | 1667 | 1864 | <b>1765,5</b> |
| MS4A8B     | -0,200766 | 0,079339  | <b>-0,0607135</b> | 1557 | 1691 | <b>1624</b>   |

|          |           |           |                   |      |      |               |
|----------|-----------|-----------|-------------------|------|------|---------------|
| ZDHHHC21 | -0,274499 | 0,153163  | <b>-0,060668</b>  | 1915 | 1894 | <b>1904,5</b> |
| BMF      | -0,135331 | 0,01415   | <b>-0,0605905</b> | 2217 | 2092 | <b>2154,5</b> |
| SCG5     | -0,703678 | 0,582876  | <b>-0,060401</b>  | 1480 | 2496 | <b>1988</b>   |
| MED25    | -0,182657 | 0,062507  | <b>-0,060075</b>  | 1786 | 2098 | <b>1942</b>   |
| MATK     | 0,688336  | -0,808333 | <b>-0,0599985</b> | 1301 | 2219 | <b>1760</b>   |
| GNE      | -1,481438 | 1,361484  | <b>-0,059977</b>  | 2073 | 1482 | <b>1777,5</b> |
| TSPAN4   | -0,059389 | NaN       | <b>-0,059389</b>  | 1610 | NaN  | <b>1610</b>   |
| ZDHHHC17 | -0,058968 | -0,05975  | <b>-0,059359</b>  | 1814 | 2265 | <b>2039,5</b> |
| OR13H1   | -0,059291 | NaN       | <b>-0,059291</b>  | 1149 | NaN  | <b>1149</b>   |
| TCEANC2  | -0,05903  | NaN       | <b>-0,05903</b>   | 1608 | NaN  | <b>1608</b>   |
| SLC22A7  | -0,077393 | -0,040661 | <b>-0,059027</b>  | 1321 | 2023 | <b>1672</b>   |
| OR5K3    | 0,085941  | -0,203913 | <b>-0,058986</b>  | 1330 | 1777 | <b>1553,5</b> |
| SGMS2    | -0,731645 | 0,613738  | <b>-0,0589535</b> | 1321 | 2790 | <b>2055,5</b> |
| HSD17B11 | 0,085308  | -0,202539 | <b>-0,0586155</b> | 1644 | 2339 | <b>1991,5</b> |
| STEAP4   | 0,568552  | -0,68539  | <b>-0,058419</b>  | 1863 | 1933 | <b>1898</b>   |
| CPA2     | 0,458102  | -0,574705 | <b>-0,0583015</b> | 1607 | 2269 | <b>1938</b>   |
| CCL21    | 0,310552  | -0,426982 | <b>-0,058215</b>  | 1755 | 2516 | <b>2135,5</b> |
| PYGB     | -0,038397 | -0,077282 | <b>-0,0578395</b> | 1587 | 1645 | <b>1616</b>   |
| AGA      | -0,459151 | 0,343573  | <b>-0,057789</b>  | 1818 | 2180 | <b>1999</b>   |
| CGA      | -0,0577   | NaN       | <b>-0,0577</b>    | 1653 | NaN  | <b>1653</b>   |
| MMP7     | 0,57325   | -0,68856  | <b>-0,057655</b>  | 1727 | 2031 | <b>1879</b>   |
| ZMAT4    | -0,802523 | 0,687239  | <b>-0,057642</b>  | 1634 | 1713 | <b>1673,5</b> |
| ALDH3A1  | 0,490712  | -0,605878 | <b>-0,057583</b>  | 1611 | 2088 | <b>1849,5</b> |
| CUL4A    | -0,269865 | 0,155566  | <b>-0,0571495</b> | 2074 | 2871 | <b>2472,5</b> |
| ARHGAP20 | -0,013557 | -0,100331 | <b>-0,056944</b>  | 1183 | 2205 | <b>1694</b>   |
| USP28    | -0,783998 | 0,670141  | <b>-0,0569285</b> | 1460 | 1778 | <b>1619</b>   |
| RPL39L   | -0,269837 | 0,155997  | <b>-0,05692</b>   | 2028 | 2308 | <b>2168</b>   |
| SYDE1    | 0,066939  | -0,179879 | <b>-0,05647</b>   | 1776 | 2607 | <b>2191,5</b> |
| RAC2     | 1,577705  | -1,690515 | <b>-0,056405</b>  | 1630 | 1995 | <b>1812,5</b> |
| PODNL1   | -0,056199 | NaN       | <b>-0,056199</b>  | 1431 | NaN  | <b>1431</b>   |
| TNFAIP6  | -0,055856 | NaN       | <b>-0,055856</b>  | 1878 | NaN  | <b>1878</b>   |
| ZNF229   | -0,662364 | 0,550775  | <b>-0,0557945</b> | 1753 | 1908 | <b>1830,5</b> |
| PHKB     | -0,130723 | 0,019163  | <b>-0,05578</b>   | 2467 | 2546 | <b>2506,5</b> |
| WFIKK2   | 0,387531  | -0,498789 | <b>-0,055629</b>  | 1360 | 1583 | <b>1471,5</b> |

|          |           |           |                   |      |      |               |
|----------|-----------|-----------|-------------------|------|------|---------------|
| NPR3     | -0,379067 | 0,26796   | <b>-0,0555535</b> | 1305 | 2444 | <b>1874,5</b> |
| SCN3B    | -0,391606 | 0,280729  | <b>-0,0554385</b> | 1785 | 3062 | <b>2423,5</b> |
| C9orf23  | -0,055431 | NaN       | <b>-0,055431</b>  | 1664 | NaN  | <b>1664</b>   |
| CDK2AP2  | 0,524798  | -0,635589 | <b>-0,0553955</b> | 1408 | 1931 | <b>1669,5</b> |
| APOA1    | -0,597436 | 0,487029  | <b>-0,0552035</b> | 1338 | 2012 | <b>1675</b>   |
| CLCN3    | -0,178106 | 0,068152  | <b>-0,054977</b>  | 641  | 1318 | <b>979,5</b>  |
| TBC1D8B  | -0,737701 | 0,628319  | <b>-0,054691</b>  | 1880 | 2465 | <b>2172,5</b> |
| TNKS2    | -0,393616 | 0,284239  | <b>-0,0546885</b> | 2104 | 2515 | <b>2309,5</b> |
| PRDX1    | -0,03163  | -0,076956 | <b>-0,054293</b>  | 1587 | 2057 | <b>1822</b>   |
| FAM198B  | -0,630204 | 0,521814  | <b>-0,054195</b>  | 1644 | 1979 | <b>1811,5</b> |
| CYSLTR1  | 0,202337  | -0,310391 | <b>-0,054027</b>  | 2796 | 2565 | <b>2680,5</b> |
| OR4C11   | -1,645964 | 1,538132  | <b>-0,053916</b>  | 1921 | 1946 | <b>1933,5</b> |
| RTN1     | -0,290222 | 0,182395  | <b>-0,0539135</b> | 1770 | 1882 | <b>1826</b>   |
| ZNF267   | 0,308487  | -0,416164 | <b>-0,0538385</b> | 1896 | 1860 | <b>1878</b>   |
| GPR21    | -0,053827 | NaN       | <b>-0,053827</b>  | 1853 | NaN  | <b>1853</b>   |
| ASPH     | 0,392483  | -0,500022 | <b>-0,0537695</b> | 1770 | 2609 | <b>2189,5</b> |
| TRPC5    | 0,089942  | -0,197115 | <b>-0,0535865</b> | 1630 | 3035 | <b>2332,5</b> |
| OR2L2    | 0,430504  | -0,537283 | <b>-0,0533895</b> | 1478 | 2402 | <b>1940</b>   |
| STK10    | -0,519259 | 0,412715  | <b>-0,053272</b>  | 1372 | 1745 | <b>1558,5</b> |
| BET1L    | -1,215116 | 1,108578  | <b>-0,053269</b>  | 1753 | 2313 | <b>2033</b>   |
| VEPH1    | 0,262512  | -0,368971 | <b>-0,0532295</b> | 1801 | 2876 | <b>2338,5</b> |
| ATHL1    | -0,297577 | 0,191824  | <b>-0,0528765</b> | 1568 | 1979 | <b>1773,5</b> |
| ANP32E   | -0,573785 | 0,468151  | <b>-0,052817</b>  | 2073 | 1183 | <b>1628</b>   |
| OTOR     | 0,535544  | -0,641128 | <b>-0,052792</b>  | 1659 | 2016 | <b>1837,5</b> |
| NUP107   | 1,040841  | -1,146081 | <b>-0,05262</b>   | 1216 | 1998 | <b>1607</b>   |
| UBR1     | -0,037935 | -0,067075 | <b>-0,052505</b>  | 1581 | 2256 | <b>1918,5</b> |
| ASB17    | -0,2302   | 0,125262  | <b>-0,052469</b>  | 1548 | 2449 | <b>1998,5</b> |
| C1orf106 | -0,342114 | 0,237213  | <b>-0,0524505</b> | 1669 | 2755 | <b>2212</b>   |
| TSHB     | 0,213347  | -0,317972 | <b>-0,0523125</b> | 1285 | 2386 | <b>1835,5</b> |
| MSH6     | 0,225863  | -0,330379 | <b>-0,052258</b>  | 1441 | 1982 | <b>1711,5</b> |
| ANGPTL5  | 0,360166  | -0,464309 | <b>-0,0520715</b> | 1402 | 1616 | <b>1509</b>   |
| ENPP3    | NaN       | -0,051973 | <b>-0,051973</b>  | NaN  | 2448 | <b>2448</b>   |
| SPICE1   | 0,109582  | -0,213265 | <b>-0,0518415</b> | 1818 | 2214 | <b>2016</b>   |
| UCP2     | -0,223074 | 0,119641  | <b>-0,0517165</b> | 1491 | 2091 | <b>1791</b>   |



|          |           |           |                   |      |      |               |
|----------|-----------|-----------|-------------------|------|------|---------------|
| LDLRAD1  | -0,051641 | NaN       | <b>-0,051641</b>  | 1800 | NaN  | <b>1800</b>   |
| C17orf75 | 0,155043  | -0,257907 | <b>-0,051432</b>  | 1619 | 2068 | <b>1843,5</b> |
| ACVR2B   | 0,147824  | -0,250212 | <b>-0,051194</b>  | 1484 | 1729 | <b>1606,5</b> |
| COX4NB   | 0,483196  | -0,585565 | <b>-0,0511845</b> | 1436 | 1733 | <b>1584,5</b> |
| ADCY4    | -0,70064  | 0,598468  | <b>-0,051086</b>  | 1835 | 2529 | <b>2182</b>   |
| MOB2     | -0,315074 | 0,213142  | <b>-0,050966</b>  | 1949 | 2274 | <b>2111,5</b> |
| SDF2     | 0,196064  | -0,297548 | <b>-0,050742</b>  | 1524 | 1485 | <b>1504,5</b> |
| MFAP3    | 0,072301  | -0,172296 | <b>-0,0499975</b> | 1834 | 2654 | <b>2244</b>   |
| RSAD1    | -0,049995 | NaN       | <b>-0,049995</b>  | 1863 | NaN  | <b>1863</b>   |
| DNAJC1   | -0,252193 | 0,152212  | <b>-0,0499905</b> | 1197 | 2012 | <b>1604,5</b> |
| GYPC     | 0,690636  | -0,789924 | <b>-0,049644</b>  | 1767 | 3014 | <b>2390,5</b> |
| MMP24    | 0,019032  | -0,118307 | <b>-0,0496375</b> | 1858 | 2151 | <b>2004,5</b> |
| LIPF     | -0,582547 | 0,48342   | <b>-0,0495635</b> | 1680 | 1973 | <b>1826,5</b> |
| RPS6KA6  | -0,656792 | 0,557667  | <b>-0,0495625</b> | 1762 | 1559 | <b>1660,5</b> |
| UBAP2L   | 0,136233  | -0,234761 | <b>-0,049264</b>  | 1740 | 2157 | <b>1948,5</b> |
| IRF3     | -0,247351 | 0,149124  | <b>-0,0491135</b> | 1408 | 2069 | <b>1738,5</b> |
| SUMO1    | 0,450228  | -0,548431 | <b>-0,0491015</b> | 2132 | 2010 | <b>2071</b>   |
| ZNF180   | 0,572753  | -0,670359 | <b>-0,048803</b>  | 1962 | 2124 | <b>2043</b>   |
| PRAME    | 0,515411  | -0,612878 | <b>-0,0487335</b> | 1677 | 1940 | <b>1808,5</b> |
| ATP8A2   | 0,534372  | -0,631625 | <b>-0,0486265</b> | 1833 | 2129 | <b>1981</b>   |
| DIRAS3   | 0,098662  | -0,195749 | <b>-0,0485435</b> | 1530 | 2729 | <b>2129,5</b> |
| SLAMF6   | NaN       | -0,048529 | <b>-0,048529</b>  | NaN  | 2528 | <b>2528</b>   |
| CNOT8    | 0,590576  | -0,687497 | <b>-0,0484605</b> | 1745 | 2603 | <b>2174</b>   |
| NOP2     | 0,027344  | -0,123972 | <b>-0,048314</b>  | 1695 | 2815 | <b>2255</b>   |
| SLC30A9  | 0,175618  | -0,271992 | <b>-0,048187</b>  | 1393 | 1902 | <b>1647,5</b> |
| PGM2L1   | -0,903792 | 0,807573  | <b>-0,0481095</b> | 1983 | 1972 | <b>1977,5</b> |
| WDR90    | 1,013871  | -1,109864 | <b>-0,0479965</b> | 1282 | 1711 | <b>1496,5</b> |
| FOXN2    | -0,641532 | 0,545633  | <b>-0,0479495</b> | 1018 | 2158 | <b>1588</b>   |
| RNMT     | 0,274084  | -0,369806 | <b>-0,047861</b>  | 906  | 2338 | <b>1622</b>   |
| PTPLAD2  | -0,058886 | -0,036668 | <b>-0,047777</b>  | 1516 | 1915 | <b>1715,5</b> |
| MAGEC3   | 0,111159  | -0,206295 | <b>-0,047568</b>  | 1048 | 2119 | <b>1583,5</b> |
| CDC42BPG | 1,100221  | -1,195153 | <b>-0,047466</b>  | 1836 | 2214 | <b>2025</b>   |
| WISP1    | 0,370423  | -0,464753 | <b>-0,047165</b>  | 1749 | 2905 | <b>2327</b>   |
| PTPRR    | -0,041573 | -0,052111 | <b>-0,046842</b>  | 1871 | 2155 | <b>2013</b>   |

|          |           |           |                   |      |      |               |
|----------|-----------|-----------|-------------------|------|------|---------------|
| SLC9A1   | -0,423889 | 0,330237  | <b>-0,046826</b>  | 1698 | 1967 | <b>1832,5</b> |
| RIMS1    | -0,338791 | 0,245298  | <b>-0,0467465</b> | 1805 | 2070 | <b>1937,5</b> |
| FAM113B  | 0,413226  | -0,506591 | <b>-0,0466825</b> | 1878 | 2478 | <b>2178</b>   |
| MOV10    | 1,276163  | -1,369081 | <b>-0,046459</b>  | 1298 | 1918 | <b>1608</b>   |
| C17orf81 | 0,851585  | -0,944412 | <b>-0,0464135</b> | 1756 | 2615 | <b>2185,5</b> |
| KIF21A   | 0,509398  | -0,602048 | <b>-0,046325</b>  | 1583 | 2121 | <b>1852</b>   |
| EFEMP1   | -0,046284 | NaN       | <b>-0,046284</b>  | 2096 | NaN  | <b>2096</b>   |
| FAM50B   | 0,387611  | -0,480064 | <b>-0,0462265</b> | 1523 | 1639 | <b>1581</b>   |
| CATSPER1 | -0,018846 | -0,073432 | <b>-0,046139</b>  | 1674 | 2126 | <b>1900</b>   |
| TMEM160  | 0,819869  | -0,911646 | <b>-0,0458885</b> | 1462 | 2043 | <b>1752,5</b> |
| LRRK1    | 1,051718  | -1,143161 | <b>-0,0457215</b> | 2076 | 1583 | <b>1829,5</b> |
| IL18R1   | 0,083169  | -0,174283 | <b>-0,045557</b>  | 1771 | 2051 | <b>1911</b>   |
| MBD5     | 0,078875  | -0,169874 | <b>-0,0454995</b> | 1294 | 2146 | <b>1720</b>   |
| KIAA0141 | -0,448227 | 0,357259  | <b>-0,045484</b>  | 1300 | 1490 | <b>1395</b>   |
| ITGAM    | -0,045117 | NaN       | <b>-0,045117</b>  | 1669 | NaN  | <b>1669</b>   |
| HP1BP3   | 0,284905  | -0,374117 | <b>-0,044606</b>  | 1630 | 2303 | <b>1966,5</b> |
| TFG      | -0,262043 | 0,172844  | <b>-0,0445995</b> | 857  | 1234 | <b>1045,5</b> |
| CX3CL1   | -0,044337 | NaN       | <b>-0,044337</b>  | 2085 | NaN  | <b>2085</b>   |
| TMX3     | NaN       | -0,044153 | <b>-0,044153</b>  | NaN  | 2343 | <b>2343</b>   |
| ARHGEF2  | -0,127546 | 0,039427  | <b>-0,0440595</b> | 1088 | 1874 | <b>1481</b>   |
| VGF      | NaN       | -0,044043 | <b>-0,044043</b>  | NaN  | 2154 | <b>2154</b>   |
| VRK3     | 0,607148  | -0,695052 | <b>-0,043952</b>  | 1491 | 2417 | <b>1954</b>   |
| CUEDC1   | -0,021567 | -0,06611  | <b>-0,0438385</b> | 1768 | 2315 | <b>2041,5</b> |
| PSG6     | -0,030048 | -0,057518 | <b>-0,043783</b>  | 1167 | 1674 | <b>1420,5</b> |
| USP34    | 0,048267  | -0,135614 | <b>-0,0436735</b> | 1323 | 1961 | <b>1642</b>   |
| PSMD11   | 0,933939  | -1,020947 | <b>-0,043504</b>  | 602  | 748  | <b>675</b>    |
| SMARCD1  | -0,226718 | 0,14107   | <b>-0,042824</b>  | 1539 | 1963 | <b>1751</b>   |
| DNAH3    | 0,217013  | -0,302526 | <b>-0,0427565</b> | 1411 | 2200 | <b>1805,5</b> |
| TACSTD2  | 0,248153  | -0,33347  | <b>-0,0426585</b> | 1682 | 1892 | <b>1787</b>   |
| ABAT     | -0,9299   | 0,844982  | <b>-0,042459</b>  | 1564 | 1818 | <b>1691</b>   |
| SPAG8    | 0,415627  | -0,500068 | <b>-0,0422205</b> | 1128 | 1528 | <b>1328</b>   |
| PAOX     | -0,21887  | 0,134741  | <b>-0,0420645</b> | 1974 | 2101 | <b>2037,5</b> |
| BAK1     | -0,308708 | 0,22517   | <b>-0,041769</b>  | 1728 | 1382 | <b>1555</b>   |
| CDH26    | 0,069411  | -0,152333 | <b>-0,041461</b>  | 1134 | 1511 | <b>1322,5</b> |

|          |           |           |                   |      |      |               |
|----------|-----------|-----------|-------------------|------|------|---------------|
| CD200R1L | -0,113132 | 0,030346  | <b>-0,041393</b>  | 1719 | 2342 | <b>2030,5</b> |
| OR6T1    | -0,194236 | 0,111584  | <b>-0,041326</b>  | 1971 | 2193 | <b>2082</b>   |
| ZNF70    | -0,318629 | 0,236459  | <b>-0,041085</b>  | 1808 | 1474 | <b>1641</b>   |
| ZCWPW1   | 0,026478  | -0,108499 | <b>-0,0410105</b> | 1615 | 2068 | <b>1841,5</b> |
| RASAL1   | 0,434055  | -0,515775 | <b>-0,04086</b>   | 1948 | 2805 | <b>2376,5</b> |
| PDZRN4   | 0,39289   | -0,474067 | <b>-0,0405885</b> | 1362 | 1976 | <b>1669</b>   |
| PPP1R15B | -0,599345 | 0,518538  | <b>-0,0404035</b> | 1231 | 2265 | <b>1748</b>   |
| RXFP2    | -0,040368 | NaN       | <b>-0,040368</b>  | 2109 | NaN  | <b>2109</b>   |
| ISOC2    | NaN       | -0,040355 | <b>-0,040355</b>  | NaN  | 3173 | <b>3173</b>   |
| CHST12   | -0,443079 | 0,362678  | <b>-0,0402005</b> | 1233 | 1555 | <b>1394</b>   |
| SMYD4    | -0,040116 | NaN       | <b>-0,040116</b>  | 1711 | NaN  | <b>1711</b>   |
| TPM2     | -0,571397 | 0,491492  | <b>-0,0399525</b> | 1710 | 2294 | <b>2002</b>   |
| DBR1     | -0,274405 | 0,194593  | <b>-0,039906</b>  | 2080 | 2156 | <b>2118</b>   |
| SPECC1   | -0,239065 | 0,159625  | <b>-0,03972</b>   | 1900 | 2471 | <b>2185,5</b> |
| FOSL1    | 0,020219  | -0,099517 | <b>-0,039649</b>  | 1815 | 2159 | <b>1987</b>   |
| CKS2     | -0,118237 | 0,039896  | <b>-0,0391705</b> | 1460 | 1980 | <b>1720</b>   |
| FAM124A  | 0,08404   | -0,162187 | <b>-0,0390735</b> | 1695 | 2250 | <b>1972,5</b> |
| NIPA1    | -0,429641 | 0,351531  | <b>-0,039055</b>  | 1442 | 1739 | <b>1590,5</b> |
| OR7G2    | -0,039003 | NaN       | <b>-0,039003</b>  | 1644 | NaN  | <b>1644</b>   |
| TMEM222  | 0,136979  | -0,214455 | <b>-0,038738</b>  | 2028 | 2509 | <b>2268,5</b> |
| C1orf53  | -1,074315 | 0,997209  | <b>-0,038553</b>  | 1399 | 1813 | <b>1606</b>   |
| CAND2    | 0,215416  | -0,292323 | <b>-0,0384535</b> | 1624 | 2345 | <b>1984,5</b> |
| DRP2     | -0,509099 | 0,432316  | <b>-0,0383915</b> | 1644 | 1849 | <b>1746,5</b> |
| ATP5S    | 0,582851  | -0,659606 | <b>-0,0383775</b> | 1790 | 2049 | <b>1919,5</b> |
| TGFB2    | 0,812709  | -0,88908  | <b>-0,0381855</b> | 1740 | 2632 | <b>2186</b>   |
| HOXC6    | -0,211185 | 0,134892  | <b>-0,0381465</b> | 1506 | 1913 | <b>1709,5</b> |
| CDK5R2   | 0,377302  | -0,453167 | <b>-0,0379325</b> | 1776 | 1491 | <b>1633,5</b> |
| COPG2    | -0,037926 | NaN       | <b>-0,037926</b>  | 1938 | NaN  | <b>1938</b>   |
| SCYL2    | -0,298735 | 0,223023  | <b>-0,037856</b>  | 1434 | 1654 | <b>1544</b>   |
| RAP2C    | -0,415444 | 0,339748  | <b>-0,037848</b>  | 552  | 1153 | <b>852,5</b>  |
| ASCC3    | -0,275114 | 0,199493  | <b>-0,0378105</b> | 995  | 1444 | <b>1219,5</b> |
| UNC5C    | -0,046421 | -0,02891  | <b>-0,0376655</b> | 1907 | 2155 | <b>2031</b>   |
| DDOST    | -0,082443 | 0,007443  | <b>-0,0375</b>    | 1549 | 1949 | <b>1749</b>   |
| SLC16A4  | -0,350673 | 0,276051  | <b>-0,037311</b>  | 1442 | 1910 | <b>1676</b>   |

|          |           |           |                   |      |      |               |
|----------|-----------|-----------|-------------------|------|------|---------------|
| C10orf46 | -0,968169 | 0,893719  | <b>-0,037225</b>  | 983  | 2900 | <b>1941,5</b> |
| GORAB    | 0,411947  | -0,486093 | <b>-0,037073</b>  | 1602 | 2181 | <b>1891,5</b> |
| CIRBP    | -0,037033 | NaN       | <b>-0,037033</b>  | 1443 | NaN  | <b>1443</b>   |
| MAPK8    | -0,114004 | 0,04002   | <b>-0,036992</b>  | 1626 | 1544 | <b>1585</b>   |
| TCP11    | -0,036955 | NaN       | <b>-0,036955</b>  | 1309 | NaN  | <b>1309</b>   |
| MXD3     | -0,03679  | NaN       | <b>-0,03679</b>   | 1662 | NaN  | <b>1662</b>   |
| DICER1   | 0,256924  | -0,330082 | <b>-0,036579</b>  | 1540 | 2156 | <b>1848</b>   |
| DNAI1    | -0,83783  | 0,764997  | <b>-0,0364165</b> | 1164 | 1187 | <b>1175,5</b> |
| TPO      | -0,180046 | 0,107318  | <b>-0,036364</b>  | 1094 | 1709 | <b>1401,5</b> |
| EXOSC5   | 0,417807  | -0,490393 | <b>-0,036293</b>  | 993  | 1756 | <b>1374,5</b> |
| ZP4      | -0,255923 | 0,183446  | <b>-0,0362385</b> | 1546 | 2739 | <b>2142,5</b> |
| ACTG2    | 0,682174  | -0,754564 | <b>-0,036195</b>  | 741  | 948  | <b>844,5</b>  |
| LRRC3    | 0,050832  | -0,123069 | <b>-0,0361185</b> | 1509 | 1905 | <b>1707</b>   |
| CLEC3A   | -0,035928 | NaN       | <b>-0,035928</b>  | 1503 | NaN  | <b>1503</b>   |
| HLF      | -0,673264 | 0,601523  | <b>-0,0358705</b> | 1887 | 2473 | <b>2180</b>   |
| LYSMD1   | 0,417743  | -0,489446 | <b>-0,0358515</b> | 1874 | 2219 | <b>2046,5</b> |
| YWHAH    | 0,403353  | -0,475037 | <b>-0,035842</b>  | 1750 | 2714 | <b>2232</b>   |
| TFDP3    | -0,035804 | NaN       | <b>-0,035804</b>  | 1431 | NaN  | <b>1431</b>   |
| DPP3     | 0,339423  | -0,410659 | <b>-0,035618</b>  | 1415 | 1544 | <b>1479,5</b> |
| OR5H2    | -1,218972 | 1,147917  | <b>-0,0355275</b> | 1728 | 1836 | <b>1782</b>   |
| CHST9    | 0,350943  | -0,421872 | <b>-0,0354645</b> | 1316 | 1903 | <b>1609,5</b> |
| MAP1B    | -0,19148  | 0,120853  | <b>-0,0353135</b> | 1391 | 2225 | <b>1808</b>   |
| POLR3E   | 0,798019  | -0,868466 | <b>-0,0352235</b> | 1649 | 2949 | <b>2299</b>   |
| ANKRD12  | -0,035216 | NaN       | <b>-0,035216</b>  | 1735 | NaN  | <b>1735</b>   |
| RWDD1    | -0,316194 | 0,246635  | <b>-0,0347795</b> | 1677 | 2258 | <b>1967,5</b> |
| GOT2     | 0,839479  | -0,90797  | <b>-0,0342455</b> | 1757 | 1857 | <b>1807</b>   |
| ZNF197   | -0,594172 | 0,526753  | <b>-0,0337095</b> | 1644 | 1782 | <b>1713</b>   |
| INF2     | 0,335981  | -0,403004 | <b>-0,0335115</b> | 1412 | 1491 | <b>1451,5</b> |
| SEPX1    | 0,204578  | -0,27098  | <b>-0,033201</b>  | 1347 | 1872 | <b>1609,5</b> |
| B3GALT6  | -0,377111 | 0,310898  | <b>-0,0331065</b> | 1405 | 1534 | <b>1469,5</b> |
| EEF1A2   | 0,144157  | -0,210357 | <b>-0,0331</b>    | 2020 | 2137 | <b>2078,5</b> |
| VSTM2L   | -0,033001 | NaN       | <b>-0,033001</b>  | 1129 | NaN  | <b>1129</b>   |
| DHFRL1   | -0,137779 | 0,071895  | <b>-0,032942</b>  | 1818 | 1892 | <b>1855</b>   |
| TXNL4A   | -0,785723 | 0,719907  | <b>-0,032908</b>  | 1638 | 2194 | <b>1916</b>   |

|          |           |           |                   |      |      |               |
|----------|-----------|-----------|-------------------|------|------|---------------|
| CRYGS    | -0,032774 | NaN       | <b>-0,032774</b>  | 1122 | NaN  | <b>1122</b>   |
| SSR2     | -0,248514 | 0,183094  | <b>-0,03271</b>   | 1883 | 2702 | <b>2292,5</b> |
| SOBP     | -0,087845 | 0,02308   | <b>-0,0323825</b> | 1979 | 2857 | <b>2418</b>   |
| ZHX1     | 0,384634  | -0,449138 | <b>-0,032252</b>  | 1756 | 2296 | <b>2026</b>   |
| LYPD6B   | 0,128032  | -0,192082 | <b>-0,032025</b>  | 1535 | 1989 | <b>1762</b>   |
| NOSTRIN  | -0,656631 | 0,592721  | <b>-0,031955</b>  | 1032 | 1640 | <b>1336</b>   |
| TMUB1    | 0,076563  | -0,140454 | <b>-0,0319455</b> | 1957 | 2797 | <b>2377</b>   |
| GLRB     | 0,552346  | -0,616027 | <b>-0,0318405</b> | 2287 | 3088 | <b>2687,5</b> |
| C12orf48 | 0,018834  | -0,082072 | <b>-0,031619</b>  | 1394 | 2034 | <b>1714</b>   |
| MAS1L    | -0,031378 | NaN       | <b>-0,031378</b>  | 1593 | NaN  | <b>1593</b>   |
| GPR125   | -0,031246 | NaN       | <b>-0,031246</b>  | 1679 | NaN  | <b>1679</b>   |
| KIAA0753 | -0,691895 | 0,629749  | <b>-0,031073</b>  | 1329 | 1665 | <b>1497</b>   |
| TMEM68   | -0,031041 | NaN       | <b>-0,031041</b>  | 1738 | NaN  | <b>1738</b>   |
| KDM5B    | -1,101322 | 1,039635  | <b>-0,0308435</b> | 1685 | 2582 | <b>2133,5</b> |
| ADAMTS13 | -0,050272 | -0,011326 | <b>-0,030799</b>  | 2215 | 2257 | <b>2236</b>   |
| GPRC5A   | -0,030796 | NaN       | <b>-0,030796</b>  | 1806 | NaN  | <b>1806</b>   |
| SH3YL1   | -0,030661 | NaN       | <b>-0,030661</b>  | 1414 | NaN  | <b>1414</b>   |
| IMPAD1   | -0,612351 | 0,551118  | <b>-0,0306165</b> | 401  | 1154 | <b>777,5</b>  |
| LRFN3    | -0,007851 | -0,052887 | <b>-0,030369</b>  | 1155 | 1608 | <b>1381,5</b> |
| PSAPL1   | -0,030297 | NaN       | <b>-0,030297</b>  | 1389 | NaN  | <b>1389</b>   |
| ASNA1    | 0,220621  | -0,280952 | <b>-0,0301655</b> | 1631 | 2015 | <b>1823</b>   |
| LANCL3   | -0,416018 | 0,355916  | <b>-0,030051</b>  | 1723 | 2569 | <b>2146</b>   |
| FAR1     | 0,03517   | -0,09392  | <b>-0,029375</b>  | 1755 | 1918 | <b>1836,5</b> |
| WNT5A    | 0,554879  | -0,613619 | <b>-0,02937</b>   | 1088 | 2074 | <b>1581</b>   |
| FAM122A  | -0,02927  | NaN       | <b>-0,02927</b>   | 2008 | NaN  | <b>2008</b>   |
| CADM4    | 0,110275  | -0,168798 | <b>-0,0292615</b> | 1607 | 1921 | <b>1764</b>   |
| TRIM65   | 0,114027  | -0,172515 | <b>-0,029244</b>  | 1655 | 2003 | <b>1829</b>   |
| SHROOM1  | 0,536952  | -0,595295 | <b>-0,0291715</b> | 1930 | 2579 | <b>2254,5</b> |
| WBP2     | -2,067802 | 2,009479  | <b>-0,0291615</b> | 462  | 852  | <b>657</b>    |
| HERPUD1  | 0,635276  | -0,692967 | <b>-0,0288455</b> | 1382 | 1285 | <b>1333,5</b> |
| IL20RA   | 0,223364  | -0,280823 | <b>-0,0287295</b> | 1914 | 2546 | <b>2230</b>   |
| BOK      | -0,028293 | NaN       | <b>-0,028293</b>  | 1558 | NaN  | <b>1558</b>   |
| ZC3H15   | -0,028163 | NaN       | <b>-0,028163</b>  | 2008 | NaN  | <b>2008</b>   |
| PPARGC1A | 0,011258  | -0,067493 | <b>-0,0281175</b> | 1447 | 1914 | <b>1680,5</b> |

|          |           |           |                   |      |      |               |
|----------|-----------|-----------|-------------------|------|------|---------------|
| PACS2    | -0,192146 | 0,136145  | <b>-0,0280005</b> | 1649 | 1758 | <b>1703,5</b> |
| C11orf87 | -0,39242  | 0,337038  | <b>-0,027691</b>  | 1528 | 1787 | <b>1657,5</b> |
| SLC35A3  | -1,196832 | 1,141873  | <b>-0,0274795</b> | 1901 | 2194 | <b>2047,5</b> |
| ADAT3    | -0,027442 | NaN       | <b>-0,027442</b>  | 1477 | NaN  | <b>1477</b>   |
| SAC3D1   | 0,48382   | -0,538223 | <b>-0,0272015</b> | 1485 | 2094 | <b>1789,5</b> |
| ZNF333   | 0,450593  | -0,504965 | <b>-0,027186</b>  | 1650 | 1512 | <b>1581</b>   |
| ZNF589   | -0,026998 | NaN       | <b>-0,026998</b>  | 1987 | NaN  | <b>1987</b>   |
| CTPS2    | 0,129081  | -0,182897 | <b>-0,026908</b>  | 1851 | 1591 | <b>1721</b>   |
| TFAP2A   | -0,603741 | 0,549977  | <b>-0,026882</b>  | 1262 | 1863 | <b>1562,5</b> |
| PLS3     | 0,172306  | -0,225975 | <b>-0,0268345</b> | 2099 | 2279 | <b>2189</b>   |
| DHX15    | 0,303402  | -0,356864 | <b>-0,026731</b>  | 1779 | 2662 | <b>2220,5</b> |
| SNX19    | -0,744036 | 0,690748  | <b>-0,026644</b>  | 1874 | 1938 | <b>1906</b>   |
| EXTL1    | -0,257423 | 0,204165  | <b>-0,026629</b>  | 1415 | 1741 | <b>1578</b>   |
| PAPPA2   | -0,52564  | 0,472444  | <b>-0,026598</b>  | 1152 | 1610 | <b>1381</b>   |
| DNAJC28  | -0,026419 | NaN       | <b>-0,026419</b>  | 1355 | NaN  | <b>1355</b>   |
| MTDH     | 0,210417  | -0,26303  | <b>-0,0263065</b> | 1552 | 2014 | <b>1783</b>   |
| TMEM209  | -0,172118 | 0,119645  | <b>-0,0262365</b> | 1868 | 1524 | <b>1696</b>   |
| CMTM5    | -0,034695 | -0,017479 | <b>-0,026087</b>  | 1247 | 1818 | <b>1532,5</b> |
| OR10W1   | -0,458661 | 0,406521  | <b>-0,02607</b>   | 1320 | 1871 | <b>1595,5</b> |
| CTNBL1   | -0,025936 | NaN       | <b>-0,025936</b>  | 1822 | NaN  | <b>1822</b>   |
| HAGHL    | -0,68746  | 0,635969  | <b>-0,0257455</b> | 965  | 1503 | <b>1234</b>   |
| FOPNL    | -0,025588 | NaN       | <b>-0,025588</b>  | 1736 | NaN  | <b>1736</b>   |
| TGFA     | -0,283986 | 0,233017  | <b>-0,0254845</b> | 1793 | 1385 | <b>1589</b>   |
| CD36     | -0,388315 | 0,337348  | <b>-0,0254835</b> | 1503 | 1775 | <b>1639</b>   |
| RUFY2    | 0,794779  | -0,845002 | <b>-0,0251115</b> | 1562 | 1731 | <b>1646,5</b> |
| SIM2     | -0,107344 | 0,057166  | <b>-0,025089</b>  | 1834 | 1705 | <b>1769,5</b> |
| TMEM184C | -0,152358 | 0,102306  | <b>-0,025026</b>  | 1802 | 2048 | <b>1925</b>   |
| ANKRD13A | -0,823287 | 0,773271  | <b>-0,025008</b>  | 1776 | 2138 | <b>1957</b>   |
| ATP8B2   | -0,104952 | 0,055125  | <b>-0,0249135</b> | 1847 | 1992 | <b>1919,5</b> |
| MELK     | -0,222592 | 0,172907  | <b>-0,0248425</b> | 2071 | 2162 | <b>2116,5</b> |
| HGD      | -0,136322 | 0,086781  | <b>-0,0247705</b> | 2051 | 1998 | <b>2024,5</b> |
| SCIN     | -0,024764 | NaN       | <b>-0,024764</b>  | 1697 | NaN  | <b>1697</b>   |
| SUPT3H   | 0,206648  | -0,25564  | <b>-0,024496</b>  | 1468 | 3271 | <b>2369,5</b> |
| DRG2     | 0,588995  | -0,637725 | <b>-0,024365</b>  | 1422 | 2194 | <b>1808</b>   |

|           |           |           |                   |      |      |               |
|-----------|-----------|-----------|-------------------|------|------|---------------|
| OR2AE1    | -0,024294 | NaN       | <b>-0,024294</b>  | 1512 | NaN  | <b>1512</b>   |
| GSG1L     | -0,024212 | NaN       | <b>-0,024212</b>  | 1023 | NaN  | <b>1023</b>   |
| WDR34     | -1,034547 | 0,986327  | <b>-0,02411</b>   | 1974 | 1437 | <b>1705,5</b> |
| PRMT7     | 0,884163  | -0,931856 | <b>-0,0238465</b> | 1835 | 2085 | <b>1960</b>   |
| DLK1      | -0,051917 | 0,004309  | <b>-0,023804</b>  | 1316 | 1888 | <b>1602</b>   |
| PPP1CB    | 0,141159  | -0,18863  | <b>-0,0237355</b> | 1821 | 1959 | <b>1890</b>   |
| CAMK2D    | -0,039694 | -0,007677 | <b>-0,0236855</b> | 1686 | 2081 | <b>1883,5</b> |
| SGCZ      | 0,248103  | -0,295429 | <b>-0,023663</b>  | 1301 | 1482 | <b>1391,5</b> |
| AGXT2L1   | 0,926668  | -0,973096 | <b>-0,023214</b>  | 1618 | 1694 | <b>1656</b>   |
| ADCY6     | 0,146887  | -0,192571 | <b>-0,022842</b>  | 1592 | 1825 | <b>1708,5</b> |
| FJX1      | -0,857465 | 0,811797  | <b>-0,022834</b>  | 1733 | 1821 | <b>1777</b>   |
| CASP10    | -0,028883 | -0,016041 | <b>-0,022462</b>  | 2490 | 2191 | <b>2340,5</b> |
| ZDHHC13   | -0,023085 | -0,021511 | <b>-0,022298</b>  | 1508 | 2314 | <b>1911</b>   |
| TNFAIP8L3 | -0,022211 | NaN       | <b>-0,022211</b>  | 1644 | NaN  | <b>1644</b>   |
| CDK2      | -0,302229 | 0,258169  | <b>-0,02203</b>   | 1629 | 2024 | <b>1826,5</b> |
| PHRF1     | -0,229459 | 0,185497  | <b>-0,021981</b>  | 1674 | 2683 | <b>2178,5</b> |
| CWC27     | 0,529718  | -0,573287 | <b>-0,0217845</b> | 2132 | 2319 | <b>2225,5</b> |
| COIL      | -0,310561 | 0,267074  | <b>-0,0217435</b> | 1491 | 1902 | <b>1696,5</b> |
| AMMECR1   | 0,191809  | -0,235017 | <b>-0,021604</b>  | 1559 | 2281 | <b>1920</b>   |
| ARHGAP18  | -0,134879 | 0,091881  | <b>-0,021499</b>  | 1440 | 1569 | <b>1504,5</b> |
| ABCD3     | -0,209371 | 0,166853  | <b>-0,021259</b>  | 1658 | 2313 | <b>1985,5</b> |
| C5orf54   | -0,293028 | 0,251199  | <b>-0,0209145</b> | 1453 | 1835 | <b>1644</b>   |
| IL17RC    | 0,120459  | -0,162243 | <b>-0,020892</b>  | 1897 | 2915 | <b>2406</b>   |
| PI4KB     | 0,81279   | -0,854442 | <b>-0,020826</b>  | 1460 | 1640 | <b>1550</b>   |
| SLC22A25  | 0,007415  | -0,048695 | <b>-0,02064</b>   | 1972 | 3031 | <b>2501,5</b> |
| ITGA10    | -0,791537 | 0,750645  | <b>-0,020446</b>  | 1485 | 1964 | <b>1724,5</b> |
| UCHL3     | 0,807428  | -0,848013 | <b>-0,0202925</b> | 817  | 2018 | <b>1417,5</b> |
| FRAS1     | 0,616609  | -0,657006 | <b>-0,0201985</b> | 1614 | 2182 | <b>1898</b>   |
| BBX       | -0,513225 | 0,472832  | <b>-0,0201965</b> | 1769 | 2262 | <b>2015,5</b> |
| NCL       | 0,860099  | -0,900176 | <b>-0,0200385</b> | 1466 | 2082 | <b>1774</b>   |
| SASH1     | 0,049678  | -0,089726 | <b>-0,020024</b>  | 1786 | 2383 | <b>2084,5</b> |
| PLEKHF2   | 0,054044  | -0,093842 | <b>-0,019899</b>  | 1874 | 2007 | <b>1940,5</b> |
| DNAJC27   | 0,048189  | -0,087787 | <b>-0,019799</b>  | 1666 | 2037 | <b>1851,5</b> |
| PPAT      | -0,132357 | 0,092855  | <b>-0,019751</b>  | 2021 | 2469 | <b>2245</b>   |

|          |           |           |                   |      |      |               |
|----------|-----------|-----------|-------------------|------|------|---------------|
| ALKBH7   | -0,055299 | 0,01608   | <b>-0,0196095</b> | 1248 | 1409 | <b>1328,5</b> |
| ODF3L2   | -0,450543 | 0,411379  | <b>-0,019582</b>  | 1655 | 2431 | <b>2043</b>   |
| E2F6     | -0,149632 | 0,110959  | <b>-0,0193365</b> | 1403 | 1993 | <b>1698</b>   |
| C15orf44 | 0,824629  | -0,862491 | <b>-0,018931</b>  | 1555 | 1746 | <b>1650,5</b> |
| TMEM45B  | -0,018856 | NaN       | <b>-0,018856</b>  | 1563 | NaN  | <b>1563</b>   |
| ZNF337   | 0,175255  | -0,212946 | <b>-0,0188455</b> | 1942 | 2754 | <b>2348</b>   |
| TXNL4B   | -1,00947  | 0,971834  | <b>-0,018818</b>  | 1594 | 2806 | <b>2200</b>   |
| PFKFB3   | -0,63418  | 0,596584  | <b>-0,018798</b>  | 1668 | 1843 | <b>1755,5</b> |
| NECAP2   | -0,018448 | NaN       | <b>-0,018448</b>  | 1616 | NaN  | <b>1616</b>   |
| SYCP1    | -0,018342 | NaN       | <b>-0,018342</b>  | 1526 | NaN  | <b>1526</b>   |
| SNTG1    | -0,017812 | NaN       | <b>-0,017812</b>  | 1328 | NaN  | <b>1328</b>   |
| HSF2     | 0,376181  | -0,41174  | <b>-0,0177795</b> | 1895 | 1693 | <b>1794</b>   |
| PELI1    | 0,073158  | -0,1082   | <b>-0,017521</b>  | 2027 | 1943 | <b>1985</b>   |
| HMGCS1   | -0,957521 | 0,922515  | <b>-0,017503</b>  | 1519 | 1981 | <b>1750</b>   |
| RAD23A   | 0,267142  | -0,301954 | <b>-0,017406</b>  | 2040 | 2095 | <b>2067,5</b> |
| ELOVL7   | 0,424693  | -0,459354 | <b>-0,0173305</b> | 2045 | 1980 | <b>2012,5</b> |
| MAP3K12  | 0,017445  | -0,052026 | <b>-0,0172905</b> | 1473 | 1942 | <b>1707,5</b> |
| WDR55    | 0,775121  | -0,808726 | <b>-0,0168025</b> | 1661 | 1834 | <b>1747,5</b> |
| SPNS1    | -0,340643 | 0,307073  | <b>-0,016785</b>  | 1718 | 3417 | <b>2567,5</b> |
| TMEM35   | 0,816373  | -0,849472 | <b>-0,0165495</b> | 1281 | 2086 | <b>1683,5</b> |
| CDK5RAP1 | 0,284931  | -0,317812 | <b>-0,0164405</b> | 1275 | 1777 | <b>1526</b>   |
| SPAST    | NaN       | -0,016434 | <b>-0,016434</b>  | NaN  | 3271 | <b>3271</b>   |
| SLC35B3  | 0,169598  | -0,202177 | <b>-0,0162895</b> | 1886 | 2540 | <b>2213</b>   |
| CSTF2    | -0,182837 | 0,150901  | <b>-0,015968</b>  | 1372 | 2309 | <b>1840,5</b> |
| PRMT8    | 0,022822  | -0,054681 | <b>-0,0159295</b> | 1690 | 2912 | <b>2301</b>   |
| HAUS3    | 0,355045  | -0,386899 | <b>-0,015927</b>  | 1643 | 1510 | <b>1576,5</b> |
| ABCF1    | 0,054891  | -0,086672 | <b>-0,0158905</b> | 1462 | 2012 | <b>1737</b>   |
| CDCA8    | -0,136589 | 0,105125  | <b>-0,015732</b>  | 1774 | 1681 | <b>1727,5</b> |
| POLR2G   | -0,137987 | 0,106818  | <b>-0,0155845</b> | 1070 | 1281 | <b>1175,5</b> |
| RNF2     | -0,333626 | 0,30272   | <b>-0,015453</b>  | 2024 | 2367 | <b>2195,5</b> |
| EFS      | -0,570715 | 0,539856  | <b>-0,0154295</b> | 905  | 1360 | <b>1132,5</b> |
| NT5C3L   | -0,015341 | NaN       | <b>-0,015341</b>  | 1819 | NaN  | <b>1819</b>   |
| UBQLN1   | 0,339019  | -0,369555 | <b>-0,015268</b>  | 937  | 2041 | <b>1489</b>   |
| RCAN3    | 0,74151   | -0,771751 | <b>-0,0151205</b> | 2073 | 2055 | <b>2064</b>   |



|           |           |           |                   |      |      |               |
|-----------|-----------|-----------|-------------------|------|------|---------------|
| MURC      | -1,217386 | 1,187284  | <b>-0,015051</b>  | 1895 | 2573 | <b>2234</b>   |
| EDAR      | -0,261716 | 0,232231  | <b>-0,0147425</b> | 1311 | 1643 | <b>1477</b>   |
| ABCB10    | 0,305711  | -0,334788 | <b>-0,0145385</b> | 1533 | 2481 | <b>2007</b>   |
| CXorf26   | 0,270794  | -0,299789 | <b>-0,0144975</b> | 1412 | 2127 | <b>1769,5</b> |
| HMGXB4    | 0,982089  | -1,010422 | <b>-0,0141665</b> | 1374 | 2044 | <b>1709</b>   |
| OR6B2     | 0,270536  | -0,298645 | <b>-0,0140545</b> | 822  | 1346 | <b>1084</b>   |
| PITPNC1   | 0,233099  | -0,261113 | <b>-0,014007</b>  | 1729 | 2545 | <b>2137</b>   |
| GNAI2     | -0,157893 | 0,130056  | <b>-0,0139185</b> | 1842 | 1770 | <b>1806</b>   |
| CAMKMT    | 0,453372  | -0,480821 | <b>-0,0137245</b> | 1841 | 2357 | <b>2099</b>   |
| PON2      | -0,042835 | 0,015694  | <b>-0,0135705</b> | 1037 | 1644 | <b>1340,5</b> |
| MCM2      | 0,293941  | -0,321082 | <b>-0,0135705</b> | 1402 | 1616 | <b>1509</b>   |
| DUSP3     | -0,250539 | 0,223457  | <b>-0,013541</b>  | 756  | 1255 | <b>1005,5</b> |
| HAUS2     | -0,40603  | 0,379056  | <b>-0,013487</b>  | 1800 | 2538 | <b>2169</b>   |
| CHD1L     | 0,219473  | -0,246215 | <b>-0,013371</b>  | 1439 | 2426 | <b>1932,5</b> |
| MRPS2     | 0,701524  | -0,727624 | <b>-0,01305</b>   | 1583 | 1362 | <b>1472,5</b> |
| MBNL1     | 0,491055  | -0,516737 | <b>-0,012841</b>  | 1554 | 2208 | <b>1881</b>   |
| MEGF8     | 0,708577  | -0,733724 | <b>-0,0125735</b> | 1950 | 2164 | <b>2057</b>   |
| FGF19     | -0,300255 | 0,275264  | <b>-0,0124955</b> | 1460 | 2121 | <b>1790,5</b> |
| KCNIP4    | 0,136632  | -0,16002  | <b>-0,011694</b>  | 1916 | 2871 | <b>2393,5</b> |
| MRPS15    | -0,136955 | 0,113749  | <b>-0,011603</b>  | 1544 | 1485 | <b>1514,5</b> |
| PURG      | 0,027741  | -0,050922 | <b>-0,0115905</b> | 1424 | 1106 | <b>1265</b>   |
| GPR137B   | 0,07952   | -0,1024   | <b>-0,01144</b>   | 1785 | 2438 | <b>2111,5</b> |
| HIST1H2AA | 0,261762  | -0,28456  | <b>-0,011399</b>  | 1503 | 1772 | <b>1637,5</b> |
| NEGR1     | -0,011363 | NaN       | <b>-0,011363</b>  | 1893 | NaN  | <b>1893</b>   |
| FBXL20    | -0,177754 | 0,155111  | <b>-0,0113215</b> | 1697 | 2606 | <b>2151,5</b> |
| KCNA6     | -0,10217  | 0,079677  | <b>-0,0112465</b> | 1591 | 2000 | <b>1795,5</b> |
| HAO2      | 0,145025  | -0,167375 | <b>-0,011175</b>  | 1525 | 1960 | <b>1742,5</b> |
| PANK2     | -0,573487 | 0,551196  | <b>-0,0111455</b> | 1517 | 1645 | <b>1581</b>   |
| PRKCSH    | 0,045566  | -0,067742 | <b>-0,011088</b>  | 1047 | 1321 | <b>1184</b>   |
| CHRM3     | -0,010971 | NaN       | <b>-0,010971</b>  | 1780 | NaN  | <b>1780</b>   |
| RFTN2     | -0,010876 | NaN       | <b>-0,010876</b>  | 1537 | NaN  | <b>1537</b>   |
| RNF135    | 0,548897  | -0,570617 | <b>-0,01086</b>   | 2080 | 3219 | <b>2649,5</b> |
| C12orf60  | -0,565073 | 0,543497  | <b>-0,010788</b>  | 1789 | 2355 | <b>2072</b>   |
| MYH13     | -0,078934 | 0,057428  | <b>-0,010753</b>  | 1165 | 1552 | <b>1358,5</b> |

|          |           |           |                   |      |      |               |
|----------|-----------|-----------|-------------------|------|------|---------------|
| ZNF518B  | 0,514182  | -0,535255 | <b>-0,0105365</b> | 1844 | 2123 | <b>1983,5</b> |
| MANEAL   | -0,0102   | NaN       | <b>-0,0102</b>    | 1887 | NaN  | <b>1887</b>   |
| PPARGC1B | 0,394555  | -0,414589 | <b>-0,010017</b>  | 1756 | 2192 | <b>1974</b>   |
| CTCF     | -0,070162 | 0,050659  | <b>-0,0097515</b> | 1791 | 2529 | <b>2160</b>   |
| KIAA0922 | -0,308627 | 0,289207  | <b>-0,00971</b>   | 1271 | 2242 | <b>1756,5</b> |
| BANP     | 1,12189   | -1,141026 | <b>-0,009568</b>  | 1707 | 1981 | <b>1844</b>   |
| SOX8     | 1,116325  | -1,135099 | <b>-0,009387</b>  | 1163 | 1645 | <b>1404</b>   |
| OR5B12   | -0,009217 | NaN       | <b>-0,009217</b>  | 1272 | NaN  | <b>1272</b>   |
| MPZL2    | -0,008954 | NaN       | <b>-0,008954</b>  | 1492 | NaN  | <b>1492</b>   |
| ZNF642   | -0,556765 | 0,538862  | <b>-0,0089515</b> | 425  | 744  | <b>584,5</b>  |
| SLC25A1  | -0,235225 | 0,217553  | <b>-0,008836</b>  | 1599 | 1961 | <b>1780</b>   |
| MEF2C    | -0,075355 | 0,058996  | <b>-0,0081795</b> | 1842 | 1802 | <b>1822</b>   |
| GNG11    | -0,008154 | NaN       | <b>-0,008154</b>  | 1895 | NaN  | <b>1895</b>   |
| FAM9B    | 0,221918  | -0,238025 | <b>-0,0080535</b> | 1748 | 2118 | <b>1933</b>   |
| OR4A16   | 0,372513  | -0,388285 | <b>-0,007886</b>  | 1756 | 2194 | <b>1975</b>   |
| RASGEF1B | 0,156684  | -0,172229 | <b>-0,0077725</b> | 2036 | 2292 | <b>2164</b>   |
| RCL1     | 0,087937  | -0,103444 | <b>-0,0077535</b> | 1765 | 2202 | <b>1983,5</b> |
| NFRKB    | -0,477283 | 0,461778  | <b>-0,0077525</b> | 1176 | 1677 | <b>1426,5</b> |
| ZSCAN16  | 0,963195  | -0,978316 | <b>-0,0075605</b> | 2085 | 3157 | <b>2621</b>   |
| ZNF800   | -0,007552 | NaN       | <b>-0,007552</b>  | 1240 | NaN  | <b>1240</b>   |
| PDE3B    | -0,161799 | 0,147174  | <b>-0,0073125</b> | 1365 | 1810 | <b>1587,5</b> |
| SLC27A5  | 0,411076  | -0,425528 | <b>-0,007226</b>  | 928  | 1826 | <b>1377</b>   |
| TRMT2B   | -0,132147 | 0,118079  | <b>-0,007034</b>  | 1669 | 1689 | <b>1679</b>   |
| GMFG     | 0,591463  | -0,605472 | <b>-0,0070045</b> | 1819 | 2172 | <b>1995,5</b> |
| TRAK1    | -0,006817 | NaN       | <b>-0,006817</b>  | 1843 | NaN  | <b>1843</b>   |
| RND2     | -0,03973  | 0,026207  | <b>-0,0067615</b> | 1857 | 1857 | <b>1857</b>   |
| PAX5     | 0,107679  | -0,121194 | <b>-0,0067575</b> | 1018 | 1868 | <b>1443</b>   |
| PSMD7    | 0,635763  | -0,649036 | <b>-0,0066365</b> | 622  | 902  | <b>762</b>    |
| SPTSSA   | -1,358626 | 1,345452  | <b>-0,006587</b>  | 1838 | 2346 | <b>2092</b>   |
| GEMIN4   | 0,260653  | -0,273661 | <b>-0,006504</b>  | 1486 | 1540 | <b>1513</b>   |
| NFE2L2   | 0,25799   | -0,270529 | <b>-0,0062695</b> | 1220 | 1842 | <b>1531</b>   |
| ZDHHC20  | -0,006254 | NaN       | <b>-0,006254</b>  | 1923 | NaN  | <b>1923</b>   |
| CD1D     | 0,111542  | -0,124024 | <b>-0,006241</b>  | 1586 | 1863 | <b>1724,5</b> |
| AGPAT5   | -0,446344 | 0,434102  | <b>-0,006121</b>  | 2003 | 2440 | <b>2221,5</b> |

|           |           |           |                   |      |      |               |
|-----------|-----------|-----------|-------------------|------|------|---------------|
| PRSS57    | 0,605324  | -0,617534 | <b>-0,006105</b>  | 1634 | 1563 | <b>1598,5</b> |
| BAIAP2L2  | 0,757621  | -0,769702 | <b>-0,0060405</b> | 1839 | 2585 | <b>2212</b>   |
| FAM105A   | 0,317497  | -0,329443 | <b>-0,005973</b>  | 1672 | 2226 | <b>1949</b>   |
| C1QTNF4   | -0,005945 | NaN       | <b>-0,005945</b>  | 1710 | NaN  | <b>1710</b>   |
| SNX33     | -0,069205 | 0,057747  | <b>-0,005729</b>  | 1437 | 1698 | <b>1567,5</b> |
| PSEN2     | 0,530194  | -0,541581 | <b>-0,0056935</b> | 2223 | 2072 | <b>2147,5</b> |
| ZNF264    | 0,259155  | -0,269801 | <b>-0,005323</b>  | 1784 | 2015 | <b>1899,5</b> |
| C8A       | -0,485423 | 0,474855  | <b>-0,005284</b>  | 1661 | 2337 | <b>1999</b>   |
| PHLDA2    | -0,349877 | 0,339669  | <b>-0,005104</b>  | 1370 | 1844 | <b>1607</b>   |
| C11orf2   | 0,667326  | -0,677348 | <b>-0,005011</b>  | 1466 | 1592 | <b>1529</b>   |
| FAN1      | -0,005009 | NaN       | <b>-0,005009</b>  | 1147 | NaN  | <b>1147</b>   |
| PCDH17    | -0,004912 | NaN       | <b>-0,004912</b>  | 1695 | NaN  | <b>1695</b>   |
| GSTM5     | -0,027009 | 0,017221  | <b>-0,004894</b>  | 1334 | 2635 | <b>1984,5</b> |
| RPL37A    | -0,004864 | NaN       | <b>-0,004864</b>  | 1064 | NaN  | <b>1064</b>   |
| NUDCD2    | 0,424813  | -0,434208 | <b>-0,0046975</b> | 1677 | 1873 | <b>1775</b>   |
| LRRN3     | 0,037358  | -0,046606 | <b>-0,004624</b>  | 1748 | 2098 | <b>1923</b>   |
| IQCF1     | -0,004591 | NaN       | <b>-0,004591</b>  | 1873 | NaN  | <b>1873</b>   |
| RAB3A     | 0,044221  | -0,053148 | <b>-0,0044635</b> | 1368 | 2660 | <b>2014</b>   |
| DBF4B     | -0,004367 | NaN       | <b>-0,004367</b>  | 1794 | NaN  | <b>1794</b>   |
| STOML1    | 0,357027  | -0,365535 | <b>-0,004254</b>  | 1358 | 1552 | <b>1455</b>   |
| LARS2     | 0,208232  | -0,216691 | <b>-0,0042295</b> | 1617 | 2705 | <b>2161</b>   |
| EPN2      | 0,365354  | -0,3738   | <b>-0,004223</b>  | 1709 | 1773 | <b>1741</b>   |
| BLOC1S2   | 0,642998  | -0,651435 | <b>-0,0042185</b> | 1597 | 1821 | <b>1709</b>   |
| DENND1B   | 0,357138  | -0,365061 | <b>-0,0039615</b> | 1539 | 1917 | <b>1728</b>   |
| F2R       | -0,003745 | NaN       | <b>-0,003745</b>  | 1615 | NaN  | <b>1615</b>   |
| CLCA3P    | -0,951465 | 0,944002  | <b>-0,0037315</b> | 1084 | 1885 | <b>1484,5</b> |
| CASC5     | 0,205223  | -0,211496 | <b>-0,0031365</b> | 966  | 1700 | <b>1333</b>   |
| IFNA8     | -0,003017 | NaN       | <b>-0,003017</b>  | 1475 | NaN  | <b>1475</b>   |
| C10orf111 | -0,144933 | 0,138955  | <b>-0,002989</b>  | 909  | 1420 | <b>1164,5</b> |
| COL28A1   | -0,002928 | NaN       | <b>-0,002928</b>  | 1343 | NaN  | <b>1343</b>   |
| FGFR1OP   | 0,11081   | -0,116283 | <b>-0,0027365</b> | 1938 | 3038 | <b>2488</b>   |
| ZNF674    | 0,069948  | -0,075183 | <b>-0,0026175</b> | 1159 | 1799 | <b>1479</b>   |
| ZMYM3     | -0,453181 | 0,448025  | <b>-0,002578</b>  | 1662 | 999  | <b>1330,5</b> |
| BCAP29    | -0,172264 | 0,167435  | <b>-0,0024145</b> | 1839 | 2998 | <b>2418,5</b> |

|           |           |           |                   |      |      |               |
|-----------|-----------|-----------|-------------------|------|------|---------------|
| VEZT      | -0,00239  | NaN       | <b>-0,00239</b>   | 1707 | NaN  | <b>1707</b>   |
| C5orf4    | 0,087865  | -0,092092 | <b>-0,0021135</b> | 1590 | 2236 | <b>1913</b>   |
| ETF1      | 0,453157  | -0,457206 | <b>-0,0020245</b> | 1285 | 1487 | <b>1386</b>   |
| KCNJ8     | 0,247827  | -0,251088 | <b>-0,0016305</b> | 2158 | 2765 | <b>2461,5</b> |
| ZNF195    | -0,387213 | 0,384409  | <b>-0,001402</b>  | 1889 | 2123 | <b>2006</b>   |
| BEND7     | 0,605421  | -0,607745 | <b>-0,001162</b>  | 1340 | 1869 | <b>1604,5</b> |
| HOXD1     | -0,580648 | 0,578569  | <b>-0,0010395</b> | 1385 | 1697 | <b>1541</b>   |
| CTH       | 0,240987  | -0,242131 | <b>-0,000572</b>  | 1519 | 1481 | <b>1500</b>   |
| PCDH19    | 0,15562   | -0,156467 | <b>-0,0004235</b> | 1609 | 2008 | <b>1808,5</b> |
| KLC2      | -0,452759 | 0,451968  | <b>-0,0003955</b> | 1633 | 1823 | <b>1728</b>   |
| KIAA0284  | 0,125307  | -0,125917 | <b>-0,000305</b>  | 1869 | 2274 | <b>2071,5</b> |
| GPRIN2    | 0,259037  | -0,259594 | <b>-0,0002785</b> | 1717 | 2941 | <b>2329</b>   |
| OR2H2     | -0,000252 | NaN       | <b>-0,000252</b>  | 1832 | NaN  | <b>1832</b>   |
| PPP1R13B  | -0,984828 | 0,984668  | <b>-8E-05</b>     | 1689 | 2495 | <b>2092</b>   |
| FGF7      | -0,72332  | 0,723232  | <b>-4,4E-05</b>   | 1285 | 1625 | <b>1455</b>   |
| ZNHIT1    | -0,545545 | 0,545508  | <b>-1,85E-05</b>  | 764  | 1396 | <b>1080</b>   |
| RAP2A     | 0,144439  | -0,144056 | <b>0,0001915</b>  | 1740 | 2364 | <b>2052</b>   |
| COL8A1    | -0,477035 | 0,477542  | <b>0,0002535</b>  | 1491 | 2369 | <b>1930</b>   |
| AKAP12    | 0,000344  | NaN       | <b>0,000344</b>   | 1707 | NaN  | <b>1707</b>   |
| VDR       | 0,760679  | -0,759685 | <b>0,000497</b>   | 1520 | 1872 | <b>1696</b>   |
| ZIC2      | 0,638799  | -0,637508 | <b>0,0006455</b>  | 1064 | 1455 | <b>1259,5</b> |
| KLK4      | 0,263037  | -0,261572 | <b>0,0007325</b>  | 2174 | 2245 | <b>2209,5</b> |
| C10orf118 | 0,659163  | -0,657583 | <b>0,00079</b>    | 2048 | 2249 | <b>2148,5</b> |
| LY6H      | 1,382017  | -1,380179 | <b>0,000919</b>   | 1290 | 1939 | <b>1614,5</b> |
| APH1B     | -1,14142  | 1,143418  | <b>0,000999</b>   | 1813 | 1228 | <b>1520,5</b> |
| TFEC      | 0,184823  | -0,182757 | <b>0,001033</b>   | 1445 | 2569 | <b>2007</b>   |
| KIAA0090  | 0,001442  | NaN       | <b>0,001442</b>   | 1598 | NaN  | <b>1598</b>   |
| FCER1A    | 0,111444  | -0,108501 | <b>0,0014715</b>  | 1585 | 2690 | <b>2137,5</b> |
| DCP1A     | -1,019387 | 1,022467  | <b>0,00154</b>    | 2131 | 2531 | <b>2331</b>   |
| C4orf43   | -0,000066 | 0,003435  | <b>0,0016845</b>  | 1621 | 1553 | <b>1587</b>   |
| MERTK     | -0,133584 | 0,137144  | <b>0,00178</b>    | 1851 | 1852 | <b>1851,5</b> |
| MED12L    | 0,001953  | NaN       | <b>0,001953</b>   | 1953 | NaN  | <b>1953</b>   |
| IDH3G     | 1,244004  | -1,239937 | <b>0,0020335</b>  | 1828 | 2653 | <b>2240,5</b> |
| PRKAR1B   | -0,084396 | 0,088509  | <b>0,0020565</b>  | 1403 | 1852 | <b>1627,5</b> |

|          |           |           |                  |      |      |               |
|----------|-----------|-----------|------------------|------|------|---------------|
| DUSP26   | 0,86344   | -0,858593 | <b>0,0024235</b> | 1933 | 2054 | <b>1993,5</b> |
| ACTN2    | 0,63852   | -0,632449 | <b>0,0030355</b> | 1991 | 1870 | <b>1930,5</b> |
| SLC2A2   | -0,194348 | 0,200486  | <b>0,003069</b>  | 533  | 1330 | <b>931,5</b>  |
| EXOSC10  | -0,278592 | 0,286722  | <b>0,004065</b>  | 2384 | 2797 | <b>2590,5</b> |
| CDT1     | -0,161641 | 0,169954  | <b>0,0041565</b> | 1365 | 1708 | <b>1536,5</b> |
| PMS1     | 1,202727  | -1,194243 | <b>0,004242</b>  | 991  | 1849 | <b>1420</b>   |
| PROK2    | 0,241324  | -0,232807 | <b>0,0042585</b> | 1308 | 1993 | <b>1650,5</b> |
| CEP120   | 0,008398  | 0,000398  | <b>0,004398</b>  | 1605 | 2137 | <b>1871</b>   |
| B3GNT8   | 0,264408  | -0,255522 | <b>0,004443</b>  | 1618 | 2651 | <b>2134,5</b> |
| GALNT9   | -0,166768 | 0,175738  | <b>0,004485</b>  | 1692 | 2060 | <b>1876</b>   |
| SLC22A2  | -0,534261 | 0,543248  | <b>0,0044935</b> | 1751 | 2418 | <b>2084,5</b> |
| LEMD2    | 0,100013  | -0,090937 | <b>0,004538</b>  | 1617 | 1799 | <b>1708</b>   |
| STK25    | 0,580143  | -0,570713 | <b>0,004715</b>  | 1921 | 1532 | <b>1726,5</b> |
| C2orf29  | -0,920422 | 0,930422  | <b>0,005</b>     | 1246 | 1591 | <b>1418,5</b> |
| PID1     | 0,005297  | NaN       | <b>0,005297</b>  | 1576 | NaN  | <b>1576</b>   |
| TRIP10   | 0,451076  | -0,439969 | <b>0,0055535</b> | 1914 | 2214 | <b>2064</b>   |
| LOH12CR1 | 0,114679  | -0,103509 | <b>0,005585</b>  | 1759 | 2179 | <b>1969</b>   |
| GABBR1   | 0,005636  | NaN       | <b>0,005636</b>  | 1613 | NaN  | <b>1613</b>   |
| NDUFA12  | -0,010387 | 0,021667  | <b>0,00564</b>   | 1771 | 2074 | <b>1922,5</b> |
| ISLR     | -0,018157 | 0,029785  | <b>0,005814</b>  | 1287 | 1996 | <b>1641,5</b> |
| LPAR3    | -0,234658 | 0,246361  | <b>0,0058515</b> | 2097 | 1746 | <b>1921,5</b> |
| ADAR     | NaN       | 0,005951  | <b>0,005951</b>  | NaN  | 2433 | <b>2433</b>   |
| SP3      | 0,424716  | -0,412657 | <b>0,0060295</b> | 1102 | 2037 | <b>1569,5</b> |
| VRK2     | -0,059731 | 0,071994  | <b>0,0061315</b> | 2002 | 1414 | <b>1708</b>   |
| FOXJ2    | 0,56512   | -0,55258  | <b>0,00627</b>   | 1298 | 1714 | <b>1506</b>   |
| METTL21B | 0,006471  | NaN       | <b>0,006471</b>  | 891  | NaN  | <b>891</b>    |
| AMFR     | 0,460678  | -0,447627 | <b>0,0065255</b> | 1565 | 2954 | <b>2259,5</b> |
| LHX5     | -0,027207 | 0,041845  | <b>0,007319</b>  | 1260 | 1722 | <b>1491</b>   |
| NAA40    | 0,007325  | NaN       | <b>0,007325</b>  | 1658 | NaN  | <b>1658</b>   |
| CYB5R3   | -0,309724 | 0,32504   | <b>0,007658</b>  | 1244 | 2053 | <b>1648,5</b> |
| EIF2AK2  | -0,593799 | 0,609583  | <b>0,007892</b>  | 1892 | 2233 | <b>2062,5</b> |
| FHIT     | -0,559574 | 0,575425  | <b>0,0079255</b> | 1310 | 2027 | <b>1668,5</b> |
| PICALM   | 0,959274  | -0,943308 | <b>0,007983</b>  | 1465 | 1939 | <b>1702</b>   |
| C12orf57 | 0,119232  | -0,102803 | <b>0,0082145</b> | 1541 | 1648 | <b>1594,5</b> |

|          |           |           |                  |      |      |               |
|----------|-----------|-----------|------------------|------|------|---------------|
| RFWD2    | 0,050415  | -0,033837 | <b>0,008289</b>  | 1979 | 3065 | <b>2522</b>   |
| SLC25A44 | -0,198641 | 0,215431  | <b>0,008395</b>  | 1908 | 1839 | <b>1873,5</b> |
| KRTAP4-4 | 0,008437  | NaN       | <b>0,008437</b>  | 1877 | NaN  | <b>1877</b>   |
| NDRG3    | -0,088766 | 0,105663  | <b>0,0084485</b> | 1577 | 1974 | <b>1775,5</b> |
| PDZD9    | 0,864442  | -0,847235 | <b>0,0086035</b> | 1789 | 2504 | <b>2146,5</b> |
| CP       | -0,39013  | 0,407386  | <b>0,008628</b>  | 1450 | 2291 | <b>1870,5</b> |
| OPTN     | 0,280717  | -0,263452 | <b>0,0086325</b> | 1998 | 2183 | <b>2090,5</b> |
| CELA3B   | 0,009321  | NaN       | <b>0,009321</b>  | 1367 | NaN  | <b>1367</b>   |
| CAMLG    | 0,139032  | -0,119832 | <b>0,0096</b>    | 1938 | 1953 | <b>1945,5</b> |
| ZNF233   | 0,009641  | NaN       | <b>0,009641</b>  | 2193 | NaN  | <b>2193</b>   |
| C2orf56  | 0,529153  | -0,509814 | <b>0,0096695</b> | 1641 | 1563 | <b>1602</b>   |
| ADAMTS16 | -0,153867 | 0,17322   | <b>0,0096765</b> | 1825 | 2432 | <b>2128,5</b> |
| B2M      | 0,528417  | -0,508546 | <b>0,0099355</b> | 1669 | 2373 | <b>2021</b>   |
| LRRN4CL  | 0,534171  | -0,514295 | <b>0,009938</b>  | 1678 | 2058 | <b>1868</b>   |
| C22orf32 | 0,010195  | NaN       | <b>0,010195</b>  | 2009 | NaN  | <b>2009</b>   |
| NR1D1    | 0,734458  | -0,713887 | <b>0,0102855</b> | 1442 | 2167 | <b>1804,5</b> |
| C1QL2    | 0,424532  | -0,403682 | <b>0,010425</b>  | 1583 | 2690 | <b>2136,5</b> |
| WFDC13   | -0,220299 | 0,241798  | <b>0,0107495</b> | 1575 | 1869 | <b>1722</b>   |
| SH3RF2   | -0,22735  | 0,248891  | <b>0,0107705</b> | 590  | 1410 | <b>1000</b>   |
| RBFOX2   | 0,245272  | -0,223527 | <b>0,0108725</b> | 1331 | 1564 | <b>1447,5</b> |
| CUEDC2   | 0,133723  | -0,111823 | <b>0,01095</b>   | 1639 | 2966 | <b>2302,5</b> |
| ZNF212   | -0,367463 | 0,389802  | <b>0,0111695</b> | 1328 | 1316 | <b>1322</b>   |
| CXorf66  | 0,011179  | NaN       | <b>0,011179</b>  | 1774 | NaN  | <b>1774</b>   |
| FBXL7    | -0,256039 | 0,278439  | <b>0,0112</b>    | 1864 | 3090 | <b>2477</b>   |
| HUS1     | 0,293942  | -0,271503 | <b>0,0112195</b> | 2048 | 2315 | <b>2181,5</b> |
| CDHR1    | -0,099293 | 0,121981  | <b>0,011344</b>  | 1198 | 1760 | <b>1479</b>   |
| PARP10   | -0,123007 | 0,145712  | <b>0,0113525</b> | 1861 | 2210 | <b>2035,5</b> |
| MYO16    | -0,302565 | 0,325343  | <b>0,011389</b>  | 1777 | 2013 | <b>1895</b>   |
| MINPP1   | -0,814842 | 0,837712  | <b>0,011435</b>  | 1922 | 2278 | <b>2100</b>   |
| SEMA3C   | 0,32901   | -0,305331 | <b>0,0118395</b> | 1704 | 2204 | <b>1954</b>   |
| WASF3    | 0,959138  | -0,934969 | <b>0,0120845</b> | 1895 | 2194 | <b>2044,5</b> |
| CXCL13   | 0,012106  | NaN       | <b>0,012106</b>  | 2231 | NaN  | <b>2231</b>   |
| ZDHHC3   | -0,195083 | 0,220098  | <b>0,0125075</b> | 1182 | 2364 | <b>1773</b>   |
| CYP26C1  | 0,012891  | NaN       | <b>0,012891</b>  | 1798 | NaN  | <b>1798</b>   |

|          |           |           |                  |      |      |               |
|----------|-----------|-----------|------------------|------|------|---------------|
| HOMER1   | 0,740174  | -0,714035 | <b>0,0130695</b> | 1784 | 1952 | <b>1868</b>   |
| PKN1     | 0,389329  | -0,363134 | <b>0,0130975</b> | 1996 | 2116 | <b>2056</b>   |
| CLCA2    | -1,135588 | 1,162445  | <b>0,0134285</b> | 1949 | 2197 | <b>2073</b>   |
| RNASEL   | -0,21436  | 0,241375  | <b>0,0135075</b> | 2074 | 2115 | <b>2094,5</b> |
| SOX2     | 0,81956   | -0,792463 | <b>0,0135485</b> | 399  | 1726 | <b>1062,5</b> |
| PIK3C2G  | 0,157936  | -0,130515 | <b>0,0137105</b> | 1887 | 2207 | <b>2047</b>   |
| DET1     | 0,269005  | -0,241114 | <b>0,0139455</b> | 1486 | 1974 | <b>1730</b>   |
| PRDM16   | -0,528974 | 0,556916  | <b>0,013971</b>  | 1758 | 2041 | <b>1899,5</b> |
| LDHB     | 1,05285   | -1,024828 | <b>0,014011</b>  | 1886 | 1827 | <b>1856,5</b> |
| SPAG6    | -0,074029 | 0,102306  | <b>0,0141385</b> | 2090 | 2129 | <b>2109,5</b> |
| SP1      | -0,166217 | 0,195287  | <b>0,014535</b>  | 727  | 1592 | <b>1159,5</b> |
| COL4A2   | -0,162077 | 0,191288  | <b>0,0146055</b> | 1811 | 2000 | <b>1905,5</b> |
| RPF2     | 0,380349  | -0,350949 | <b>0,0147</b>    | 1714 | 2271 | <b>1992,5</b> |
| LILRB5   | -0,587654 | 0,617118  | <b>0,014732</b>  | 1970 | 2664 | <b>2317</b>   |
| C6orf162 | 0,014758  | NaN       | <b>0,014758</b>  | 1656 | NaN  | <b>1656</b>   |
| EIF5B    | -0,274013 | 0,303715  | <b>0,014851</b>  | 1792 | 1453 | <b>1622,5</b> |
| NUDT1    | -0,183801 | 0,213608  | <b>0,0149035</b> | 1877 | 2114 | <b>1995,5</b> |
| SH3BGR12 | 0,659417  | -0,628886 | <b>0,0152655</b> | 1594 | 2557 | <b>2075,5</b> |
| FXYS5    | 0,351316  | -0,320447 | <b>0,0154345</b> | 1053 | 3129 | <b>2091</b>   |
| LRRC42   | 0,308373  | -0,277485 | <b>0,015444</b>  | 1441 | 2042 | <b>1741,5</b> |
| C9       | -0,713236 | 0,74432   | <b>0,015542</b>  | 1707 | 1930 | <b>1818,5</b> |
| MACROD2  | 0,2881    | -0,256945 | <b>0,0155775</b> | 2066 | 2822 | <b>2444</b>   |
| BOD1L    | 1,180864  | -1,149617 | <b>0,0156235</b> | 1125 | 1928 | <b>1526,5</b> |
| MYO1B    | 0,015774  | NaN       | <b>0,015774</b>  | 1543 | NaN  | <b>1543</b>   |
| NANOS2   | 0,706339  | -0,674111 | <b>0,016114</b>  | 2428 | 2164 | <b>2296</b>   |
| PKD2L2   | 0,052715  | -0,020462 | <b>0,0161265</b> | 2384 | 3169 | <b>2776,5</b> |
| STYXL1   | 0,530156  | -0,497829 | <b>0,0161635</b> | 972  | 2014 | <b>1493</b>   |
| XPO5     | 0,506267  | -0,47363  | <b>0,0163185</b> | 1193 | 1827 | <b>1510</b>   |
| BTK      | 0,110299  | -0,077655 | <b>0,016322</b>  | 2106 | 2029 | <b>2067,5</b> |
| MCTP1    | 0,255099  | -0,222257 | <b>0,016421</b>  | 1330 | 1837 | <b>1583,5</b> |
| TP53     | -0,192055 | 0,225108  | <b>0,0165265</b> | 1217 | 1139 | <b>1178</b>   |
| MX2      | 0,126113  | -0,09304  | <b>0,0165365</b> | 1708 | 2159 | <b>1933,5</b> |
| POU2AF1  | -0,233398 | 0,266702  | <b>0,016652</b>  | 1186 | 2115 | <b>1650,5</b> |
| KAT2B    | -0,454177 | 0,487782  | <b>0,0168025</b> | 1786 | 2114 | <b>1950</b>   |

|          |           |           |                  |      |      |               |
|----------|-----------|-----------|------------------|------|------|---------------|
| NLRP12   | 0,733112  | -0,699465 | <b>0,0168235</b> | 2006 | 2146 | <b>2076</b>   |
| C9orf82  | -0,080135 | 0,114923  | <b>0,017394</b>  | 1903 | 3156 | <b>2529,5</b> |
| C19orf44 | 0,778518  | -0,743539 | <b>0,0174895</b> | 1820 | 2262 | <b>2041</b>   |
| RBBP4    | -0,584375 | 0,6194    | <b>0,0175125</b> | 1932 | 2458 | <b>2195</b>   |
| FARP2    | 0,068929  | -0,03379  | <b>0,0175695</b> | 1954 | 1752 | <b>1853</b>   |
| C18orf26 | -0,380587 | 0,415807  | <b>0,01761</b>   | 1114 | 1537 | <b>1325,5</b> |
| ZSCAN1   | 0,291572  | -0,256298 | <b>0,017637</b>  | 1650 | 1714 | <b>1682</b>   |
| ITPKC    | 0,662109  | -0,626778 | <b>0,0176655</b> | 1593 | 2515 | <b>2054</b>   |
| ZNF528   | 0,017809  | NaN       | <b>0,017809</b>  | 1214 | NaN  | <b>1214</b>   |
| BRSK2    | 0,340358  | -0,304738 | <b>0,01781</b>   | 1526 | 2222 | <b>1874</b>   |
| TCEAL4   | -1,404302 | 1,440345  | <b>0,0180215</b> | 1669 | 1987 | <b>1828</b>   |
| EPB41L5  | -0,095695 | 0,131755  | <b>0,01803</b>   | 1912 | 2344 | <b>2128</b>   |
| C1orf35  | -0,089577 | 0,126401  | <b>0,018412</b>  | 1392 | 2053 | <b>1722,5</b> |
| KNTC1    | 0,018744  | NaN       | <b>0,018744</b>  | 2012 | NaN  | <b>2012</b>   |
| FAM193A  | 0,696674  | -0,659081 | <b>0,0187965</b> | 1494 | 2137 | <b>1815,5</b> |
| PARP15   | 0,018893  | NaN       | <b>0,018893</b>  | 1666 | NaN  | <b>1666</b>   |
| PTGIS    | -0,328636 | 0,366545  | <b>0,0189545</b> | 1705 | 1913 | <b>1809</b>   |
| AQP1     | NaN       | 0,019227  | <b>0,019227</b>  | NaN  | 2687 | <b>2687</b>   |
| PGM5     | -0,062176 | 0,101224  | <b>0,019524</b>  | 1299 | 2157 | <b>1728</b>   |
| H2AFJ    | -0,576027 | 0,615183  | <b>0,019578</b>  | 1261 | 1425 | <b>1343</b>   |
| CLGN     | 0,45661   | -0,417398 | <b>0,019606</b>  | 1852 | 2970 | <b>2411</b>   |
| AP4E1    | 0,29511   | -0,255851 | <b>0,0196295</b> | 1702 | 2126 | <b>1914</b>   |
| SCYL3    | 0,256157  | -0,216642 | <b>0,0197575</b> | 1608 | 2383 | <b>1995,5</b> |
| LARP4    | 0,019883  | NaN       | <b>0,019883</b>  | 1578 | NaN  | <b>1578</b>   |
| METTL3   | -0,616032 | 0,656169  | <b>0,0200685</b> | 1276 | 2037 | <b>1656,5</b> |
| LPAR1    | 0,675225  | -0,635079 | <b>0,020073</b>  | 1230 | 1698 | <b>1464</b>   |
| AURKA    | 0,205451  | -0,164838 | <b>0,0203065</b> | 1097 | 1484 | <b>1290,5</b> |
| MANEA    | 0,02032   | NaN       | <b>0,02032</b>   | 1562 | NaN  | <b>1562</b>   |
| FABP1    | 0,228864  | -0,188217 | <b>0,0203235</b> | 1748 | 1695 | <b>1721,5</b> |
| LAT2     | -0,335644 | 0,377093  | <b>0,0207245</b> | 1620 | 2460 | <b>2040</b>   |
| FOXK2    | -0,383344 | 0,424801  | <b>0,0207285</b> | 1520 | 2106 | <b>1813</b>   |
| GRPEL2   | -0,025277 | 0,067142  | <b>0,0209325</b> | 1879 | 2241 | <b>2060</b>   |
| RAPGEF3  | -0,270545 | 0,31293   | <b>0,0211925</b> | 1543 | 1846 | <b>1694,5</b> |
| TMEM92   | 0,176826  | -0,134216 | <b>0,021305</b>  | 1624 | 2293 | <b>1958,5</b> |



|         |           |           |                  |      |      |               |
|---------|-----------|-----------|------------------|------|------|---------------|
| PGD     | 0,294973  | -0,252153 | <b>0,02141</b>   | 1229 | 1337 | <b>1283</b>   |
| FOXD2   | 1,081406  | -1,038456 | <b>0,021475</b>  | 1294 | 2314 | <b>1804</b>   |
| ENTPD8  | -0,608339 | 0,651369  | <b>0,021515</b>  | 1869 | 2052 | <b>1960,5</b> |
| PCGF1   | -0,076048 | 0,119773  | <b>0,0218625</b> | 1488 | 2701 | <b>2094,5</b> |
| CCNJ    | 0,022024  | NaN       | <b>0,022024</b>  | 1831 | NaN  | <b>1831</b>   |
| IL20RB  | 0,315792  | -0,271426 | <b>0,022183</b>  | 2052 | 2131 | <b>2091,5</b> |
| TNIP2   | 0,022105  | 0,022642  | <b>0,0223735</b> | 1796 | 2197 | <b>1996,5</b> |
| PNCK    | -0,097986 | 0,142793  | <b>0,0224035</b> | 1442 | 2258 | <b>1850</b>   |
| SAMD4A  | -0,033895 | 0,078752  | <b>0,0224285</b> | 1178 | 2433 | <b>1805,5</b> |
| BIRC3   | 0,781279  | -0,736208 | <b>0,0225355</b> | 1922 | 2657 | <b>2289,5</b> |
| CSTF1   | 0,022565  | NaN       | <b>0,022565</b>  | 1716 | NaN  | <b>1716</b>   |
| FOSB    | -0,691286 | 0,736544  | <b>0,022629</b>  | 1234 | 1589 | <b>1411,5</b> |
| CEP89   | 0,409088  | -0,363739 | <b>0,0226745</b> | 1944 | 2682 | <b>2313</b>   |
| MTHFR   | -0,304538 | 0,349897  | <b>0,0226795</b> | 1511 | 2068 | <b>1789,5</b> |
| DDX60   | 0,182495  | -0,136774 | <b>0,0228605</b> | 1416 | 2436 | <b>1926</b>   |
| TRIM25  | -0,15555  | 0,201283  | <b>0,0228665</b> | 1141 | 1456 | <b>1298,5</b> |
| C7orf42 | 0,467879  | -0,421842 | <b>0,0230185</b> | 1540 | 2111 | <b>1825,5</b> |
| OMA1    | 0,28687   | -0,2404   | <b>0,023235</b>  | 1592 | 2349 | <b>1970,5</b> |
| UBAC1   | 0,02327   | NaN       | <b>0,02327</b>   | 1583 | NaN  | <b>1583</b>   |
| VPS33A  | 0,674698  | -0,627985 | <b>0,0233565</b> | 1356 | 1348 | <b>1352</b>   |
| THYN1   | -0,273473 | 0,320361  | <b>0,023444</b>  | 1796 | 2026 | <b>1911</b>   |
| EMR3    | 0,892249  | -0,845012 | <b>0,0236185</b> | 490  | 1342 | <b>916</b>    |
| AMELX   | 0,023632  | NaN       | <b>0,023632</b>  | 1674 | NaN  | <b>1674</b>   |
| CCDC99  | -0,011159 | 0,058472  | <b>0,0236565</b> | 785  | 1471 | <b>1128</b>   |
| TRIO    | 0,654089  | -0,606473 | <b>0,023808</b>  | 1489 | 1756 | <b>1622,5</b> |
| CAPN7   | -0,276532 | 0,32448   | <b>0,023974</b>  | 1780 | 1547 | <b>1663,5</b> |
| HOXB4   | 0,362849  | -0,314172 | <b>0,0243385</b> | 1684 | 2195 | <b>1939,5</b> |
| WNT5B   | 0,024594  | NaN       | <b>0,024594</b>  | 1679 | NaN  | <b>1679</b>   |
| TLR7    | -0,273061 | 0,322292  | <b>0,0246155</b> | 1633 | 1730 | <b>1681,5</b> |
| OPN4    | 0,024635  | NaN       | <b>0,024635</b>  | 1376 | NaN  | <b>1376</b>   |
| YIF1B   | 0,024748  | NaN       | <b>0,024748</b>  | 1283 | NaN  | <b>1283</b>   |
| CCDC136 | 0,024901  | NaN       | <b>0,024901</b>  | 1541 | NaN  | <b>1541</b>   |
| PIK3R4  | -0,726297 | 0,776136  | <b>0,0249195</b> | 1788 | 2408 | <b>2098</b>   |
| ADAM15  | -0,331441 | 0,381395  | <b>0,024977</b>  | 1762 | 1695 | <b>1728,5</b> |

|          |           |           |                  |      |      |               |
|----------|-----------|-----------|------------------|------|------|---------------|
| FASTKD5  | 0,027999  | 0,022605  | <b>0,025302</b>  | 1744 | 2535 | <b>2139,5</b> |
| SLC25A38 | 0,270709  | -0,219927 | <b>0,025391</b>  | 1703 | 2419 | <b>2061</b>   |
| NOXA1    | -0,086321 | 0,137252  | <b>0,0254655</b> | 1546 | 2189 | <b>1867,5</b> |
| IRF6     | 0,293445  | -0,242343 | <b>0,025551</b>  | 1958 | 2808 | <b>2383</b>   |
| MTO1     | 0,565877  | -0,514575 | <b>0,025651</b>  | 1614 | 1968 | <b>1791</b>   |
| MBIP     | 0,372425  | -0,32108  | <b>0,0256725</b> | 1424 | 2663 | <b>2043,5</b> |
| C17orf79 | 0,142421  | -0,090734 | <b>0,0258435</b> | 1921 | 2821 | <b>2371</b>   |
| UTF1     | -0,089389 | 0,141225  | <b>0,025918</b>  | 1925 | 1415 | <b>1670</b>   |
| MMP8     | -0,352158 | 0,404092  | <b>0,025967</b>  | 2005 | 2383 | <b>2194</b>   |
| SPTAN1   | 0,767149  | -0,71448  | <b>0,0263345</b> | 1547 | 1798 | <b>1672,5</b> |
| CISH     | -0,589876 | 0,642685  | <b>0,0264045</b> | 1118 | 1671 | <b>1394,5</b> |
| ZNF644   | -0,861019 | 0,914017  | <b>0,026499</b>  | 1736 | 1732 | <b>1734</b>   |
| TMEM61   | -0,448702 | 0,501905  | <b>0,0266015</b> | 1926 | 1825 | <b>1875,5</b> |
| PPP1R3D  | -0,299934 | 0,353192  | <b>0,026629</b>  | 982  | 2003 | <b>1492,5</b> |
| SOX12    | 0,026889  | NaN       | <b>0,026889</b>  | 1495 | NaN  | <b>1495</b>   |
| FAM189B  | 0,027254  | NaN       | <b>0,027254</b>  | 1836 | NaN  | <b>1836</b>   |
| CFHR5    | 0,067402  | -0,01289  | <b>0,027256</b>  | 1539 | 1892 | <b>1715,5</b> |
| GMPR2    | -0,429495 | 0,484051  | <b>0,027278</b>  | 1227 | 2004 | <b>1615,5</b> |
| GAS2L3   | 0,02739   | NaN       | <b>0,02739</b>   | 1734 | NaN  | <b>1734</b>   |
| DAZL     | -0,899955 | 0,955253  | <b>0,027649</b>  | 2033 | 2211 | <b>2122</b>   |
| LOC81691 | 0,006664  | 0,048744  | <b>0,027704</b>  | 1573 | 1722 | <b>1647,5</b> |
| LSM10    | 0,437392  | -0,381724 | <b>0,027834</b>  | 1567 | 1835 | <b>1701</b>   |
| RBP5     | 0,866959  | -0,811273 | <b>0,027843</b>  | 1497 | 1650 | <b>1573,5</b> |
| NSDHL    | 0,008313  | 0,04745   | <b>0,0278815</b> | 1304 | 1949 | <b>1626,5</b> |
| STRADA   | -0,333151 | 0,388968  | <b>0,0279085</b> | 1371 | 1936 | <b>1653,5</b> |
| RALGPS1  | 0,913028  | -0,857084 | <b>0,027972</b>  | 1514 | 3011 | <b>2262,5</b> |
| OPRL1    | 0,028421  | NaN       | <b>0,028421</b>  | 1449 | NaN  | <b>1449</b>   |
| ARMCX3   | 0,445318  | -0,387304 | <b>0,029007</b>  | 1480 | 1665 | <b>1572,5</b> |
| TDRD9    | 0,18275   | -0,124248 | <b>0,029251</b>  | 1828 | 2182 | <b>2005</b>   |
| FBLN1    | 0,029267  | NaN       | <b>0,029267</b>  | 1408 | NaN  | <b>1408</b>   |
| GIN51    | 0,029363  | NaN       | <b>0,029363</b>  | 2122 | NaN  | <b>2122</b>   |
| KCNE3    | -0,499385 | 0,558141  | <b>0,029378</b>  | 2400 | 2764 | <b>2582</b>   |
| TOP2A    | -0,02537  | 0,084203  | <b>0,0294165</b> | 894  | 1528 | <b>1211</b>   |
| FFAR2    | 0,029609  | NaN       | <b>0,029609</b>  | 1690 | NaN  | <b>1690</b>   |

|           |           |           |                  |      |      |               |
|-----------|-----------|-----------|------------------|------|------|---------------|
| MOGAT1    | -0,269919 | 0,329215  | <b>0,029648</b>  | 1699 | 2206 | <b>1952,5</b> |
| KRTAP10-7 | 0,591002  | -0,53153  | <b>0,029736</b>  | 1960 | 2953 | <b>2456,5</b> |
| FAM19A1   | 0,444528  | -0,384907 | <b>0,0298105</b> | 1654 | 2179 | <b>1916,5</b> |
| CLEC6A    | 0,014283  | 0,046847  | <b>0,030565</b>  | 1833 | 2354 | <b>2093,5</b> |
| TOX3      | 0,030627  | NaN       | <b>0,030627</b>  | 2003 | NaN  | <b>2003</b>   |
| DSCR6     | 0,385155  | -0,323233 | <b>0,030961</b>  | 1716 | 1895 | <b>1805,5</b> |
| NUP43     | 0,03163   | NaN       | <b>0,03163</b>   | 1676 | NaN  | <b>1676</b>   |
| ATP5A1    | 0,57104   | -0,506731 | <b>0,0321545</b> | 1713 | 1707 | <b>1710</b>   |
| NPHP1     | -0,230696 | 0,295119  | <b>0,0322115</b> | 1126 | 2001 | <b>1563,5</b> |
| KRI1      | 0,032261  | NaN       | <b>0,032261</b>  | 1631 | NaN  | <b>1631</b>   |
| ALDH6A1   | -0,342839 | 0,40739   | <b>0,0322755</b> | 1736 | 1864 | <b>1800</b>   |
| TAB2      | -0,37397  | 0,439418  | <b>0,032724</b>  | 1732 | 1818 | <b>1775</b>   |
| SH2D4B    | -0,022962 | 0,088822  | <b>0,03293</b>   | 2218 | 3455 | <b>2836,5</b> |
| JAGN1     | 0,033006  | NaN       | <b>0,033006</b>  | 1866 | NaN  | <b>1866</b>   |
| EBF1      | -0,047057 | 0,113427  | <b>0,033185</b>  | 1275 | 2231 | <b>1753</b>   |
| CECR5     | 0,214021  | -0,147435 | <b>0,033293</b>  | 1882 | 2590 | <b>2236</b>   |
| FANCA     | -0,306129 | 0,37308   | <b>0,0334755</b> | 1780 | 2185 | <b>1982,5</b> |
| ALDH9A1   | -0,53941  | 0,606713  | <b>0,0336515</b> | 1999 | 2620 | <b>2309,5</b> |
| JAG2      | NaN       | 0,033864  | <b>0,033864</b>  | NaN  | 1779 | <b>1779</b>   |
| NUFIP2    | -0,099635 | 0,167662  | <b>0,0340135</b> | 1783 | 2723 | <b>2253</b>   |
| ANKRD17   | -0,409677 | 0,477881  | <b>0,034102</b>  | 1309 | 1671 | <b>1490</b>   |
| BACE2     | -0,122928 | 0,191659  | <b>0,0343655</b> | 2288 | 2270 | <b>2279</b>   |
| SLC38A11  | 0,003584  | 0,065303  | <b>0,0344435</b> | 1517 | 2377 | <b>1947</b>   |
| C16orf58  | 0,414806  | -0,345724 | <b>0,034541</b>  | 1604 | 1761 | <b>1682,5</b> |
| GEMIN2    | 0,117627  | -0,048382 | <b>0,0346225</b> | 1546 | 1389 | <b>1467,5</b> |
| ZNF787    | 0,034743  | NaN       | <b>0,034743</b>  | 1965 | NaN  | <b>1965</b>   |
| SCAND3    | 0,034943  | NaN       | <b>0,034943</b>  | 1389 | NaN  | <b>1389</b>   |
| TNFRSF8   | NaN       | 0,035199  | <b>0,035199</b>  | NaN  | 2498 | <b>2498</b>   |
| AP2S1     | -0,33409  | 0,404771  | <b>0,0353405</b> | 1437 | 1835 | <b>1636</b>   |
| ERAP2     | -0,727151 | 0,798555  | <b>0,035702</b>  | 1638 | 2235 | <b>1936,5</b> |
| ASB4      | 0,048761  | 0,022999  | <b>0,03588</b>   | 1472 | 3121 | <b>2296,5</b> |
| CTDSP1    | 0,155454  | -0,083057 | <b>0,0361985</b> | 2050 | 2476 | <b>2263</b>   |
| DZIP1L    | 0,547076  | -0,473928 | <b>0,036574</b>  | 1977 | 2776 | <b>2376,5</b> |
| KIF9      | -1,023305 | 1,096731  | <b>0,036713</b>  | 1306 | 1978 | <b>1642</b>   |

|           |           |           |                  |      |      |               |
|-----------|-----------|-----------|------------------|------|------|---------------|
| GYPB      | 0,183214  | -0,109747 | <b>0,0367335</b> | 1684 | 1925 | <b>1804,5</b> |
| RNASET2   | -0,30121  | 0,375121  | <b>0,0369555</b> | 1587 | 2308 | <b>1947,5</b> |
| CTTN      | 0,255945  | -0,181615 | <b>0,037165</b>  | 1466 | 2162 | <b>1814</b>   |
| QPRT      | -0,614735 | 0,689724  | <b>0,0374945</b> | 1269 | 1684 | <b>1476,5</b> |
| VPS16     | 0,037564  | NaN       | <b>0,037564</b>  | 1197 | NaN  | <b>1197</b>   |
| LTA       | 0,037648  | NaN       | <b>0,037648</b>  | 1388 | NaN  | <b>1388</b>   |
| OR6B1     | 0,215076  | -0,139721 | <b>0,0376775</b> | 2031 | 2148 | <b>2089,5</b> |
| IRX2      | -0,628738 | 0,7046    | <b>0,037931</b>  | 2013 | 2372 | <b>2192,5</b> |
| CLASP2    | -0,336484 | 0,412694  | <b>0,038105</b>  | 1648 | 1824 | <b>1736</b>   |
| TRIP6     | 0,294063  | -0,217634 | <b>0,0382145</b> | 1253 | 1566 | <b>1409,5</b> |
| ODF3      | 0,952098  | -0,875659 | <b>0,0382195</b> | 1430 | 1742 | <b>1586</b>   |
| LASP1     | 0,038254  | NaN       | <b>0,038254</b>  | 1660 | NaN  | <b>1660</b>   |
| C14orf126 | -0,643686 | 0,720435  | <b>0,0383745</b> | 1579 | 1514 | <b>1546,5</b> |
| PGBD2     | 0,038692  | NaN       | <b>0,038692</b>  | 1539 | NaN  | <b>1539</b>   |
| UAP1L1    | -0,064995 | 0,143238  | <b>0,0391215</b> | 1728 | 2727 | <b>2227,5</b> |
| CYP39A1   | 0,243025  | -0,1646   | <b>0,0392125</b> | 2228 | 2427 | <b>2327,5</b> |
| CHST10    | -0,706412 | 0,785263  | <b>0,0394255</b> | 1447 | 2130 | <b>1788,5</b> |
| SYNGR2    | -0,312059 | 0,390977  | <b>0,039459</b>  | 950  | 1285 | <b>1117,5</b> |
| SCRIB     | 0,234195  | -0,154878 | <b>0,0396585</b> | 2027 | 1984 | <b>2005,5</b> |
| GPR139    | 0,039745  | NaN       | <b>0,039745</b>  | 1565 | NaN  | <b>1565</b>   |
| GTF2IRD1  | NaN       | 0,039824  | <b>0,039824</b>  | NaN  | 2721 | <b>2721</b>   |
| MYNN      | 0,136586  | -0,056767 | <b>0,0399095</b> | 1612 | 2264 | <b>1938</b>   |
| ENPP5     | -0,517305 | 0,597142  | <b>0,0399185</b> | 1281 | 1911 | <b>1596</b>   |
| WDR65     | 0,214713  | -0,134798 | <b>0,0399575</b> | 2213 | 1949 | <b>2081</b>   |
| TRPC1     | -0,259582 | 0,339833  | <b>0,0401255</b> | 2007 | 2250 | <b>2128,5</b> |
| KIAA1009  | 0,551733  | -0,471286 | <b>0,0402235</b> | 1647 | 1985 | <b>1816</b>   |
| ISYNA1    | 0,604747  | -0,524249 | <b>0,040249</b>  | 1507 | 1671 | <b>1589</b>   |
| OR6S1     | 0,567948  | -0,487325 | <b>0,0403115</b> | 1870 | 2470 | <b>2170</b>   |
| RRBP1     | 0,040444  | NaN       | <b>0,040444</b>  | 969  | NaN  | <b>969</b>    |
| PPARD     | 0,396997  | -0,316023 | <b>0,040487</b>  | 1529 | 2400 | <b>1964,5</b> |
| CACNG2    | -0,213254 | 0,294324  | <b>0,040535</b>  | 1467 | 2338 | <b>1902,5</b> |
| C18orf34  | 0,040689  | NaN       | <b>0,040689</b>  | 1746 | NaN  | <b>1746</b>   |
| FPR2      | 0,040694  | NaN       | <b>0,040694</b>  | 1884 | NaN  | <b>1884</b>   |
| GTF3C3    | 0,672635  | -0,591188 | <b>0,0407235</b> | 1738 | 1907 | <b>1822,5</b> |

|          |           |           |                  |      |      |               |
|----------|-----------|-----------|------------------|------|------|---------------|
| ANOS     | 0,254084  | -0,17216  | <b>0,040962</b>  | 2125 | 2535 | <b>2330</b>   |
| PAAF1    | 0,2374    | -0,155385 | <b>0,0410075</b> | 1549 | 2389 | <b>1969</b>   |
| FBLN7    | 0,375796  | -0,293483 | <b>0,0411565</b> | 1758 | 2168 | <b>1963</b>   |
| SNX12    | 0,528066  | -0,4457   | <b>0,041183</b>  | 2139 | 2126 | <b>2132,5</b> |
| OSCAR    | -0,019643 | 0,102209  | <b>0,041283</b>  | 1675 | 1832 | <b>1753,5</b> |
| FKBP8    | -0,141207 | 0,22385   | <b>0,0413215</b> | 1229 | 1928 | <b>1578,5</b> |
| NARS     | -0,226245 | 0,308986  | <b>0,0413705</b> | 1597 | 2827 | <b>2212</b>   |
| SURF4    | 0,306269  | -0,223175 | <b>0,041547</b>  | 1497 | 2122 | <b>1809,5</b> |
| PML      | 0,780965  | -0,697693 | <b>0,041636</b>  | 1195 | 1603 | <b>1399</b>   |
| SLX4     | 0,886073  | -0,80274  | <b>0,0416665</b> | 1404 | 1619 | <b>1511,5</b> |
| TLE3     | -0,761983 | 0,84549   | <b>0,0417535</b> | 1989 | 2189 | <b>2089</b>   |
| GOS2     | 0,402449  | -0,318739 | <b>0,041855</b>  | 1499 | 1885 | <b>1692</b>   |
| TMEM31   | -1,276342 | 1,360148  | <b>0,041903</b>  | 1101 | 1539 | <b>1320</b>   |
| C15orf53 | 0,039174  | 0,04574   | <b>0,042457</b>  | 2043 | 1943 | <b>1993</b>   |
| SPACA4   | -0,243986 | 0,329478  | <b>0,042746</b>  | 1590 | 2010 | <b>1800</b>   |
| ZC3H18   | 0,043014  | NaN       | <b>0,043014</b>  | 1372 | NaN  | <b>1372</b>   |
| MRPL17   | -0,288829 | 0,37526   | <b>0,0432155</b> | 1547 | 1857 | <b>1702</b>   |
| SAGE1    | -0,059131 | 0,145773  | <b>0,043321</b>  | 1670 | 1959 | <b>1814,5</b> |
| DOM3Z    | 0,332153  | -0,245331 | <b>0,043411</b>  | 1705 | 1604 | <b>1654,5</b> |
| SNAP29   | -0,37434  | 0,461168  | <b>0,043414</b>  | 1302 | 2282 | <b>1792</b>   |
| COL4A4   | -0,679656 | 0,766589  | <b>0,0434665</b> | 1867 | 1957 | <b>1912</b>   |
| POT1     | 0,751882  | -0,664648 | <b>0,043617</b>  | 1658 | 1769 | <b>1713,5</b> |
| OR8G5    | -0,019679 | 0,107017  | <b>0,043669</b>  | 1570 | 2363 | <b>1966,5</b> |
| S100A7L2 | 0,043907  | NaN       | <b>0,043907</b>  | 1854 | NaN  | <b>1854</b>   |
| MYH14    | 0,141542  | -0,053692 | <b>0,043925</b>  | 1197 | 1619 | <b>1408</b>   |
| VRTN     | 0,619426  | -0,531546 | <b>0,04394</b>   | 1526 | 2237 | <b>1881,5</b> |
| C1S      | -0,262641 | 0,350549  | <b>0,043954</b>  | 1464 | 1945 | <b>1704,5</b> |
| KIF2C    | NaN       | 0,044029  | <b>0,044029</b>  | NaN  | 2812 | <b>2812</b>   |
| FAM84B   | 0,252709  | -0,164511 | <b>0,044099</b>  | 1422 | 1729 | <b>1575,5</b> |
| C11orf74 | 0,044454  | NaN       | <b>0,044454</b>  | 1526 | NaN  | <b>1526</b>   |
| TXNDC8   | 0,296653  | -0,207036 | <b>0,0448085</b> | 1710 | 2944 | <b>2327</b>   |
| ATG14    | -0,91274  | 1,00237   | <b>0,044815</b>  | 1780 | 1975 | <b>1877,5</b> |
| KLHL25   | 0,044868  | NaN       | <b>0,044868</b>  | 1571 | NaN  | <b>1571</b>   |
| C2orf28  | -0,523581 | 0,61352   | <b>0,0449695</b> | 1793 | 2196 | <b>1994,5</b> |

|         |           |           |                  |      |      |               |
|---------|-----------|-----------|------------------|------|------|---------------|
| LPPR1   | 0,070595  | 0,019434  | <b>0,0450145</b> | 2364 | 3012 | <b>2688</b>   |
| PLCB2   | -0,407273 | 0,497324  | <b>0,0450255</b> | 1269 | 1554 | <b>1411,5</b> |
| TTC12   | 0,149575  | -0,059438 | <b>0,0450685</b> | 1910 | 2336 | <b>2123</b>   |
| UPF3A   | 0,569732  | -0,479573 | <b>0,0450795</b> | 1606 | 2043 | <b>1824,5</b> |
| GNAZ    | 0,211103  | -0,120759 | <b>0,045172</b>  | 2027 | 2492 | <b>2259,5</b> |
| OTOF    | -1,16983  | 1,260341  | <b>0,0452555</b> | 1559 | 1756 | <b>1657,5</b> |
| SHE     | 0,045271  | NaN       | <b>0,045271</b>  | 1854 | NaN  | <b>1854</b>   |
| SFMBT1  | -0,98736  | 1,077929  | <b>0,0452845</b> | 1669 | 1679 | <b>1674</b>   |
| PDCL    | -0,387487 | 0,47834   | <b>0,0454265</b> | 1972 | 2912 | <b>2442</b>   |
| DEM1    | 0,588458  | -0,497583 | <b>0,0454375</b> | 1131 | 1685 | <b>1408</b>   |
| COG1    | 0,934642  | -0,84375  | <b>0,045446</b>  | 1615 | 2585 | <b>2100</b>   |
| MRPL55  | -0,394956 | 0,485887  | <b>0,0454655</b> | 1477 | 1922 | <b>1699,5</b> |
| RAB13   | 1,178341  | -1,087344 | <b>0,0454985</b> | 1258 | 2091 | <b>1674,5</b> |
| OAS1    | -0,841326 | 0,932541  | <b>0,0456075</b> | 1766 | 2096 | <b>1931</b>   |
| GALNS   | -0,314785 | 0,406041  | <b>0,045628</b>  | 1789 | 2128 | <b>1958,5</b> |
| KIRREL  | -0,017029 | 0,10861   | <b>0,0457905</b> | 1760 | 2665 | <b>2212,5</b> |
| PMM1    | 0,472512  | -0,380729 | <b>0,0458915</b> | 1446 | 1910 | <b>1678</b>   |
| RAB8B   | 0,698322  | -0,606365 | <b>0,0459785</b> | 1175 | 2057 | <b>1616</b>   |
| GSDMB   | -0,526415 | 0,618509  | <b>0,046047</b>  | 1404 | 1394 | <b>1399</b>   |
| ZBTB22  | 0,756684  | -0,664553 | <b>0,0460655</b> | 1654 | 2194 | <b>1924</b>   |
| HHLA2   | 0,027127  | 0,065075  | <b>0,046101</b>  | 1977 | 2055 | <b>2016</b>   |
| POLE    | 0,239993  | -0,147736 | <b>0,0461285</b> | 1275 | 1799 | <b>1537</b>   |
| GBP4    | -0,131722 | 0,22436   | <b>0,046319</b>  | 1535 | 1495 | <b>1515</b>   |
| MLL     | NaN       | 0,046403  | <b>0,046403</b>  | NaN  | 3040 | <b>3040</b>   |
| LALBA   | 0,159786  | -0,06669  | <b>0,046548</b>  | 2221 | 2123 | <b>2172</b>   |
| BMP5    | -0,900105 | 0,993355  | <b>0,046625</b>  | 1290 | 2153 | <b>1721,5</b> |
| ZNF776  | -0,051062 | 0,144319  | <b>0,0466285</b> | 1826 | 2260 | <b>2043</b>   |
| GPR173  | 0,046782  | NaN       | <b>0,046782</b>  | 1745 | NaN  | <b>1745</b>   |
| PCDHGC4 | 0,311336  | -0,217699 | <b>0,0468185</b> | 1800 | 2216 | <b>2008</b>   |
| ATXN7L1 | 0,047228  | NaN       | <b>0,047228</b>  | 1420 | NaN  | <b>1420</b>   |
| FETUB   | 0,406521  | -0,311641 | <b>0,04744</b>   | 1757 | 2402 | <b>2079,5</b> |
| PCDHGB2 | 0,198282  | -0,103386 | <b>0,047448</b>  | 1605 | 2237 | <b>1921</b>   |
| GTF2F1  | 0,450677  | -0,355323 | <b>0,047677</b>  | 1715 | 2464 | <b>2089,5</b> |
| OR4D9   | 0,186607  | -0,090915 | <b>0,047846</b>  | 1620 | 2088 | <b>1854</b>   |

|           |           |           |                  |      |      |               |
|-----------|-----------|-----------|------------------|------|------|---------------|
| ZNF302    | 0,593918  | -0,498143 | <b>0,0478875</b> | 1709 | 1941 | <b>1825</b>   |
| SPATA8    | 0,193471  | -0,097427 | <b>0,048022</b>  | 1946 | 2649 | <b>2297,5</b> |
| ZNF75D    | -0,121687 | 0,217754  | <b>0,0480335</b> | 1623 | 1553 | <b>1588</b>   |
| FAM96B    | 0,048122  | NaN       | <b>0,048122</b>  | 1386 | NaN  | <b>1386</b>   |
| LAMC1     | -0,19455  | 0,290857  | <b>0,0481535</b> | 1664 | 2009 | <b>1836,5</b> |
| MED17     | 0,124996  | -0,02843  | <b>0,048283</b>  | 1291 | 1676 | <b>1483,5</b> |
| SDS       | -0,306733 | 0,403401  | <b>0,048334</b>  | 1788 | 2068 | <b>1928</b>   |
| TCEAL8    | 0,04839   | NaN       | <b>0,04839</b>   | 1419 | NaN  | <b>1419</b>   |
| EPM2AIP1  | 0,048487  | NaN       | <b>0,048487</b>  | 1311 | NaN  | <b>1311</b>   |
| FMNL2     | -0,456084 | 0,553465  | <b>0,0486905</b> | 1810 | 1756 | <b>1783</b>   |
| PCBD1     | 0,234784  | -0,137305 | <b>0,0487395</b> | 1683 | 1698 | <b>1690,5</b> |
| CEP135    | 1,098007  | -1,00052  | <b>0,0487435</b> | 1977 | 2011 | <b>1994</b>   |
| SLC17A3   | 0,997065  | -0,899493 | <b>0,048786</b>  | 1432 | 2125 | <b>1778,5</b> |
| CCL17     | 0,048923  | NaN       | <b>0,048923</b>  | 1273 | NaN  | <b>1273</b>   |
| CST4      | 0,245334  | -0,147171 | <b>0,0490815</b> | 1364 | 1902 | <b>1633</b>   |
| KREMEN1   | -0,132357 | 0,230595  | <b>0,049119</b>  | 1495 | 1965 | <b>1730</b>   |
| ATP8A1    | -0,746694 | 0,845654  | <b>0,04948</b>   | 1480 | 2515 | <b>1997,5</b> |
| HKR1      | 0,145367  | -0,046075 | <b>0,049646</b>  | 1409 | 1949 | <b>1679</b>   |
| FAM123A   | 0,424064  | -0,324418 | <b>0,049823</b>  | 1502 | 2339 | <b>1920,5</b> |
| SS18      | 0,119523  | -0,019848 | <b>0,0498375</b> | 1655 | 1826 | <b>1740,5</b> |
| SLC39A5   | -0,229822 | 0,3296    | <b>0,049889</b>  | 1404 | 1864 | <b>1634</b>   |
| MTBP      | -0,035199 | 0,135384  | <b>0,0500925</b> | 1213 | 1012 | <b>1112,5</b> |
| MAPK10    | 0,011531  | 0,088999  | <b>0,050265</b>  | 1759 | 2067 | <b>1913</b>   |
| QSOX2     | 0,579982  | -0,479306 | <b>0,050338</b>  | 1329 | 1732 | <b>1530,5</b> |
| ABCC11    | -0,171428 | 0,272117  | <b>0,0503445</b> | 1538 | 1740 | <b>1639</b>   |
| EIF3I     | 0,008541  | 0,092158  | <b>0,0503495</b> | 1280 | 1316 | <b>1298</b>   |
| MYH9      | -0,080817 | 0,182227  | <b>0,050705</b>  | 1675 | 1821 | <b>1748</b>   |
| C20orf165 | 0,05073   | NaN       | <b>0,05073</b>   | 1489 | NaN  | <b>1489</b>   |
| VILL      | 0,05086   | NaN       | <b>0,05086</b>   | 1397 | NaN  | <b>1397</b>   |
| ELOVL5    | -0,092376 | 0,194142  | <b>0,050883</b>  | 1822 | 3061 | <b>2441,5</b> |
| FXR1      | 0,126136  | -0,02432  | <b>0,050908</b>  | 1700 | 2122 | <b>1911</b>   |
| GMPPA     | 0,521778  | -0,419902 | <b>0,050938</b>  | 1325 | 1918 | <b>1621,5</b> |
| APCS      | -0,599091 | 0,700985  | <b>0,050947</b>  | 1643 | 1748 | <b>1695,5</b> |
| AIM1L     | 0,051108  | NaN       | <b>0,051108</b>  | 1647 | NaN  | <b>1647</b>   |

|          |           |           |                  |      |      |               |
|----------|-----------|-----------|------------------|------|------|---------------|
| TBX22    | 0,093028  | 0,009334  | <b>0,051181</b>  | 2023 | 2385 | <b>2204</b>   |
| CDH10    | 0,051249  | NaN       | <b>0,051249</b>  | 2239 | NaN  | <b>2239</b>   |
| C16orf55 | 0,041744  | 0,06098   | <b>0,051362</b>  | 1714 | 1967 | <b>1840,5</b> |
| ACVR1    | -0,200021 | 0,30325   | <b>0,0516145</b> | 1678 | 1796 | <b>1737</b>   |
| OSBPL7   | -0,095087 | 0,198457  | <b>0,051685</b>  | 2012 | 2192 | <b>2102</b>   |
| WTIP     | -0,072078 | 0,175752  | <b>0,051837</b>  | 1307 | 1591 | <b>1449</b>   |
| TTPAL    | 0,057217  | 0,046525  | <b>0,051871</b>  | 1809 | 2166 | <b>1987,5</b> |
| FAIM     | -0,503061 | 0,607095  | <b>0,052017</b>  | 1973 | 2576 | <b>2274,5</b> |
| ZNF182   | 0,077413  | 0,026724  | <b>0,0520685</b> | 1888 | 2637 | <b>2262,5</b> |
| COMTD1   | -0,285824 | 0,389992  | <b>0,052084</b>  | 1841 | 2735 | <b>2288</b>   |
| C18orf25 | 0,357789  | -0,252692 | <b>0,0525485</b> | 1641 | 2125 | <b>1883</b>   |
| GBGT1    | 0,8394    | -0,73424  | <b>0,05258</b>   | 1472 | 1841 | <b>1656,5</b> |
| EPN3     | 0,052623  | NaN       | <b>0,052623</b>  | 2094 | NaN  | <b>2094</b>   |
| C19orf43 | -0,745586 | 0,850848  | <b>0,052631</b>  | 1176 | 1539 | <b>1357,5</b> |
| BTBD7    | -0,594175 | 0,699488  | <b>0,0526565</b> | 1876 | 2081 | <b>1978,5</b> |
| FAM195A  | 0,052753  | NaN       | <b>0,052753</b>  | 1718 | NaN  | <b>1718</b>   |
| RBP7     | 0,269447  | -0,163824 | <b>0,0528115</b> | 1609 | 2181 | <b>1895</b>   |
| ARPC5L   | -0,227601 | 0,333319  | <b>0,052859</b>  | 1694 | 2242 | <b>1968</b>   |
| DNAJB2   | -0,221175 | 0,327744  | <b>0,0532845</b> | 963  | 1757 | <b>1360</b>   |
| SEC14L4  | 0,027902  | 0,07895   | <b>0,053426</b>  | 1584 | 1680 | <b>1632</b>   |
| GPAT2    | 0,053652  | NaN       | <b>0,053652</b>  | 1589 | NaN  | <b>1589</b>   |
| NDUFS1   | -0,17657  | 0,283879  | <b>0,0536545</b> | 1406 | 2517 | <b>1961,5</b> |
| TP53INP1 | 0,053693  | NaN       | <b>0,053693</b>  | 1737 | NaN  | <b>1737</b>   |
| CLEC2L   | 0,378404  | -0,270864 | <b>0,05377</b>   | 1521 | 2093 | <b>1807</b>   |
| TEF      | 0,24875   | -0,140115 | <b>0,0543175</b> | 1772 | 1693 | <b>1732,5</b> |
| BMP15    | NaN       | 0,054358  | <b>0,054358</b>  | NaN  | 2517 | <b>2517</b>   |
| PKNOX1   | 0,244211  | -0,135291 | <b>0,05446</b>   | 1568 | 2166 | <b>1867</b>   |
| RRAGC    | 0,967738  | -0,858779 | <b>0,0544795</b> | 1336 | 1897 | <b>1616,5</b> |
| TMEM53   | 0,695325  | -0,585802 | <b>0,0547615</b> | 1383 | 1990 | <b>1686,5</b> |
| CNO      | -0,25221  | 0,361749  | <b>0,0547695</b> | 1990 | 1934 | <b>1962</b>   |
| LSM14A   | 0,360782  | -0,251236 | <b>0,054773</b>  | 1531 | 2339 | <b>1935</b>   |
| EOMES    | 0,436984  | -0,326979 | <b>0,0550025</b> | 1750 | 2829 | <b>2289,5</b> |
| UPP2     | 0,03134   | 0,078911  | <b>0,0551255</b> | 2144 | 2082 | <b>2113</b>   |
| ZDHHC16  | 0,873452  | -0,762916 | <b>0,055268</b>  | 655  | 1962 | <b>1308,5</b> |



|           |           |           |                  |      |      |               |
|-----------|-----------|-----------|------------------|------|------|---------------|
| MAST3     | 0,295696  | -0,185051 | <b>0,0553225</b> | 1464 | 1488 | <b>1476</b>   |
| KRTAP27-1 | 0,055385  | NaN       | <b>0,055385</b>  | 1512 | NaN  | <b>1512</b>   |
| SLC27A1   | -0,925526 | 1,036297  | <b>0,0553855</b> | 1083 | 1455 | <b>1269</b>   |
| FOXR1     | -0,326346 | 0,437283  | <b>0,0554685</b> | 1999 | 1413 | <b>1706</b>   |
| POLR3F    | 0,567331  | -0,456338 | <b>0,0554965</b> | 1483 | 1589 | <b>1536</b>   |
| KY        | -0,255811 | 0,367141  | <b>0,055665</b>  | 1379 | 2524 | <b>1951,5</b> |
| NDUFAB1   | 0,079373  | 0,032394  | <b>0,0558835</b> | 1696 | 1985 | <b>1840,5</b> |
| LSG1      | 0,444249  | -0,332465 | <b>0,055892</b>  | 1435 | 1587 | <b>1511</b>   |
| ZNF784    | 0,055994  | NaN       | <b>0,055994</b>  | 949  | NaN  | <b>949</b>    |
| TCF12     | 0,300414  | -0,188224 | <b>0,056095</b>  | 1242 | 2093 | <b>1667,5</b> |
| ROD1      | 0,441488  | -0,329059 | <b>0,0562145</b> | 1869 | 2163 | <b>2016</b>   |
| WDFY4     | 0,624311  | -0,511606 | <b>0,0563525</b> | 1336 | 2747 | <b>2041,5</b> |
| PSMB9     | 0,350264  | -0,236953 | <b>0,0566555</b> | 2105 | 1157 | <b>1631</b>   |
| tAKR      | -0,139596 | 0,253155  | <b>0,0567795</b> | 1993 | 2080 | <b>2036,5</b> |
| GFM2      | -0,698252 | 0,81225   | <b>0,056999</b>  | 1478 | 1574 | <b>1526</b>   |
| CIB3      | 0,546831  | -0,432017 | <b>0,057407</b>  | 1253 | 1426 | <b>1339,5</b> |
| PIGF      | 0,070389  | 0,045226  | <b>0,0578075</b> | 1936 | 2358 | <b>2147</b>   |
| CD37      | 0,381024  | -0,265332 | <b>0,057846</b>  | 1691 | 1788 | <b>1739,5</b> |
| PCDHGA1   | 1,15572   | -1,039887 | <b>0,0579165</b> | 1697 | 1873 | <b>1785</b>   |
| RTBDN     | -0,061948 | 0,178018  | <b>0,058035</b>  | 1744 | 2045 | <b>1894,5</b> |
| MAGEE2    | -0,90487  | 1,021108  | <b>0,058119</b>  | 2041 | 2021 | <b>2031</b>   |
| FA2H      | -0,003574 | 0,119936  | <b>0,058181</b>  | 1482 | 2509 | <b>1995,5</b> |
| RPS6KL1   | 0,725061  | -0,608375 | <b>0,058343</b>  | 1242 | 1796 | <b>1519</b>   |
| NMT2      | NaN       | 0,058568  | <b>0,058568</b>  | NaN  | 2752 | <b>2752</b>   |
| S100A8    | -0,398178 | 0,515564  | <b>0,058693</b>  | 2283 | 2260 | <b>2271,5</b> |
| POLG2     | 0,055256  | 0,062626  | <b>0,058941</b>  | 1569 | 2167 | <b>1868</b>   |
| FGD2      | -0,223689 | 0,341603  | <b>0,058957</b>  | 1644 | 2447 | <b>2045,5</b> |
| NAPG      | 0,382768  | -0,264628 | <b>0,05907</b>   | 1137 | 2030 | <b>1583,5</b> |
| SLC22A4   | -0,008999 | 0,12718   | <b>0,0590905</b> | 2058 | 2104 | <b>2081</b>   |
| SLC25A42  | 0,05914   | NaN       | <b>0,05914</b>   | 1496 | NaN  | <b>1496</b>   |
| APOB      | 0,400566  | -0,281565 | <b>0,0595005</b> | 1370 | 1829 | <b>1599,5</b> |
| LIMD1     | 0,059604  | NaN       | <b>0,059604</b>  | 1387 | NaN  | <b>1387</b>   |
| CCNA2     | 0,33057   | -0,209841 | <b>0,0603645</b> | 625  | 952  | <b>788,5</b>  |
| CCT5      | 0,528248  | -0,406664 | <b>0,060792</b>  | 1356 | 1755 | <b>1555,5</b> |

|          |           |           |                  |      |      |               |
|----------|-----------|-----------|------------------|------|------|---------------|
| LYRM2    | 0,38637   | -0,264766 | <b>0,060802</b>  | 1790 | 2139 | <b>1964,5</b> |
| FAM55B   | 0,110166  | 0,011747  | <b>0,0609565</b> | 1799 | 2738 | <b>2268,5</b> |
| HECTD3   | 0,011728  | 0,110224  | <b>0,060976</b>  | 1344 | 2376 | <b>1860</b>   |
| RGS20    | -0,893123 | 1,015271  | <b>0,061074</b>  | 1038 | 1321 | <b>1179,5</b> |
| EPO      | 0,963941  | -0,84175  | <b>0,0610955</b> | 1516 | 2056 | <b>1786</b>   |
| RASL10A  | -0,418302 | 0,540853  | <b>0,0612755</b> | 1648 | 1788 | <b>1718</b>   |
| DHX57    | 0,061439  | NaN       | <b>0,061439</b>  | 1752 | NaN  | <b>1752</b>   |
| KIAA0232 | 0,061658  | NaN       | <b>0,061658</b>  | 1638 | NaN  | <b>1638</b>   |
| ANXA10   | 0,334663  | -0,210873 | <b>0,061895</b>  | 1020 | 1337 | <b>1178,5</b> |
| GOLT1A   | 0,062151  | NaN       | <b>0,062151</b>  | 1669 | NaN  | <b>1669</b>   |
| AP1M1    | 0,06235   | NaN       | <b>0,06235</b>   | 1897 | NaN  | <b>1897</b>   |
| CALCR    | -0,042707 | 0,167445  | <b>0,062369</b>  | 2257 | 2138 | <b>2197,5</b> |
| C3orf32  | -0,259024 | 0,384136  | <b>0,062556</b>  | 1542 | 1647 | <b>1594,5</b> |
| WNT3     | -0,420171 | 0,545325  | <b>0,062577</b>  | 1650 | 1472 | <b>1561</b>   |
| NFIA     | -0,10323  | 0,228581  | <b>0,0626755</b> | 1801 | 2787 | <b>2294</b>   |
| DUSP28   | 0,062832  | NaN       | <b>0,062832</b>  | 1829 | NaN  | <b>1829</b>   |
| DAPK2    | 0,111731  | 0,014364  | <b>0,0630475</b> | 1694 | 2219 | <b>1956,5</b> |
| COX7B    | 0,279851  | -0,153381 | <b>0,063235</b>  | 1799 | 1972 | <b>1885,5</b> |
| LDLOC1L  | 0,026299  | 0,100506  | <b>0,0634025</b> | 1468 | 2398 | <b>1933</b>   |
| CHCHD1   | -0,511062 | 0,638022  | <b>0,06348</b>   | 1647 | 1702 | <b>1674,5</b> |
| CEACAM16 | 0,063545  | NaN       | <b>0,063545</b>  | 1501 | NaN  | <b>1501</b>   |
| VPS53    | 0,809814  | -0,682569 | <b>0,0636225</b> | 1404 | 2206 | <b>1805</b>   |
| GFAP     | 0,196644  | -0,069207 | <b>0,0637185</b> | 1720 | 2498 | <b>2109</b>   |
| C16orf59 | -0,223362 | 0,35106   | <b>0,063849</b>  | 1499 | 1611 | <b>1555</b>   |
| VNN1     | NaN       | 0,063961  | <b>0,063961</b>  | NaN  | 3070 | <b>3070</b>   |
| EIF3M    | -0,037435 | 0,165407  | <b>0,063986</b>  | 1522 | 2165 | <b>1843,5</b> |
| SCGB2A1  | 0,319489  | -0,19128  | <b>0,0641045</b> | 1720 | 2124 | <b>1922</b>   |
| LONP2    | 0,552119  | -0,423776 | <b>0,0641715</b> | 1969 | 2141 | <b>2055</b>   |
| CLSTN3   | 0,064335  | NaN       | <b>0,064335</b>  | 1547 | NaN  | <b>1547</b>   |
| C16orf13 | -0,334004 | 0,462726  | <b>0,064361</b>  | 1590 | 1657 | <b>1623,5</b> |
| FAM177A1 | 0,06437   | NaN       | <b>0,06437</b>   | 1855 | NaN  | <b>1855</b>   |
| ZNF829   | 0,015501  | 0,113416  | <b>0,0644585</b> | 1789 | 1879 | <b>1834</b>   |
| MEPE     | 0,064529  | NaN       | <b>0,064529</b>  | 1660 | NaN  | <b>1660</b>   |
| RRP9     | 0,126524  | 0,002583  | <b>0,0645535</b> | 1710 | 1747 | <b>1728,5</b> |

|          |           |           |                  |      |      |               |
|----------|-----------|-----------|------------------|------|------|---------------|
| TRPM5    | 0,408581  | -0,27934  | <b>0,0646205</b> | 1640 | 3017 | <b>2328,5</b> |
| ANKRD5   | NaN       | 0,064968  | <b>0,064968</b>  | NaN  | 3063 | <b>3063</b>   |
| FAM165B  | 0,065184  | NaN       | <b>0,065184</b>  | 1971 | NaN  | <b>1971</b>   |
| FAM64A   | 0,067227  | 0,063228  | <b>0,0652275</b> | 2043 | 1857 | <b>1950</b>   |
| RGS16    | 0,812404  | -0,681775 | <b>0,0653145</b> | 1683 | 2198 | <b>1940,5</b> |
| ZNF444   | 0,05531   | 0,075461  | <b>0,0653855</b> | 1520 | 1753 | <b>1636,5</b> |
| ZNF556   | 0,066269  | 0,064623  | <b>0,065446</b>  | 1380 | 1826 | <b>1603</b>   |
| FBXO40   | 0,559     | -0,428069 | <b>0,0654655</b> | 1293 | 2490 | <b>1891,5</b> |
| UMOD     | 0,065666  | NaN       | <b>0,065666</b>  | 1565 | NaN  | <b>1565</b>   |
| POC5     | 0,425378  | -0,293662 | <b>0,065858</b>  | 1673 | 2186 | <b>1929,5</b> |
| NME6     | 0,70068   | -0,568788 | <b>0,065946</b>  | 1617 | 2298 | <b>1957,5</b> |
| WDR49    | 0,748244  | -0,615999 | <b>0,0661225</b> | 1621 | 1837 | <b>1729</b>   |
| MACC1    | 0,066159  | NaN       | <b>0,066159</b>  | 1541 | NaN  | <b>1541</b>   |
| PLXNC1   | 0,066351  | NaN       | <b>0,066351</b>  | 1476 | NaN  | <b>1476</b>   |
| FHL2     | -0,030703 | 0,163911  | <b>0,066604</b>  | 1392 | 1325 | <b>1358,5</b> |
| ARID4A   | 0,669065  | -0,535538 | <b>0,0667635</b> | 1250 | 1814 | <b>1532</b>   |
| C3orf25  | 0,067137  | NaN       | <b>0,067137</b>  | 1655 | NaN  | <b>1655</b>   |
| DENND2C  | 0,06715   | NaN       | <b>0,06715</b>   | 1393 | NaN  | <b>1393</b>   |
| MED8     | -0,216637 | 0,351101  | <b>0,067232</b>  | 913  | 1185 | <b>1049</b>   |
| RPS24    | 1,038157  | -0,903631 | <b>0,067263</b>  | 602  | 835  | <b>718,5</b>  |
| KIAA1107 | 0,067301  | NaN       | <b>0,067301</b>  | 1664 | NaN  | <b>1664</b>   |
| USP14    | 0,91606   | -0,781451 | <b>0,0673045</b> | 1820 | 1674 | <b>1747</b>   |
| PRAMEF10 | 0,221693  | -0,08652  | <b>0,0675865</b> | 2027 | 1995 | <b>2011</b>   |
| ZNF396   | -0,22636  | 0,361548  | <b>0,067594</b>  | 1873 | 2492 | <b>2182,5</b> |
| BEND2    | 0,246933  | -0,110981 | <b>0,067976</b>  | 2476 | 2811 | <b>2643,5</b> |
| TMEM45A  | 0,299955  | -0,163259 | <b>0,068348</b>  | 1591 | 2359 | <b>1975</b>   |
| TMBIM6   | -0,34294  | 0,479931  | <b>0,0684955</b> | 1347 | 2008 | <b>1677,5</b> |
| INHBC    | 0,103464  | 0,033796  | <b>0,06863</b>   | 1794 | 1907 | <b>1850,5</b> |
| PLA2G2A  | -0,14416  | 0,28179   | <b>0,068815</b>  | 1778 | 3232 | <b>2505</b>   |
| BMP8A    | 0,068869  | NaN       | <b>0,068869</b>  | 1250 | NaN  | <b>1250</b>   |
| AKR7A2   | 0,357526  | -0,219545 | <b>0,0689905</b> | 1166 | 1920 | <b>1543</b>   |
| C16orf62 | 0,220434  | -0,082018 | <b>0,069208</b>  | 1545 | 1834 | <b>1689,5</b> |
| P2RX7    | 0,363861  | -0,224517 | <b>0,069672</b>  | 1539 | 2677 | <b>2108</b>   |
| MAGEB2   | -0,361571 | 0,500917  | <b>0,069673</b>  | 2124 | 1921 | <b>2022,5</b> |

|          |           |           |                  |      |      |               |
|----------|-----------|-----------|------------------|------|------|---------------|
| GOLGA5   | 0,21079   | -0,070943 | <b>0,0699235</b> | 1985 | 1836 | <b>1910,5</b> |
| PGAP2    | 0,478645  | -0,338723 | <b>0,069961</b>  | 1876 | 2440 | <b>2158</b>   |
| ARG1     | 0,577909  | -0,437976 | <b>0,0699665</b> | 1850 | 2426 | <b>2138</b>   |
| OR52W1   | -0,582375 | 0,72246   | <b>0,0700425</b> | 1370 | 1440 | <b>1405</b>   |
| CBX8     | -0,111451 | 0,251641  | <b>0,070095</b>  | 1905 | 2277 | <b>2091</b>   |
| RRM2     | -0,666453 | 0,806952  | <b>0,0702495</b> | 627  | 590  | <b>608,5</b>  |
| NOB1     | 0,070322  | NaN       | <b>0,070322</b>  | 1223 | NaN  | <b>1223</b>   |
| ALDH1L2  | 0,154063  | -0,012638 | <b>0,0707125</b> | 1208 | 1784 | <b>1496</b>   |
| EIF2B5   | 0,279502  | -0,137739 | <b>0,0708815</b> | 1084 | 1670 | <b>1377</b>   |
| DEPDC5   | 0,840234  | -0,697308 | <b>0,071463</b>  | 1374 | 1285 | <b>1329,5</b> |
| TRIML1   | 0,503465  | -0,360436 | <b>0,0715145</b> | 1463 | 2596 | <b>2029,5</b> |
| FGF12    | -0,460893 | 0,603964  | <b>0,0715355</b> | 1285 | 1645 | <b>1465</b>   |
| UGT3A1   | 0,820049  | -0,67668  | <b>0,0716845</b> | 1509 | 2097 | <b>1803</b>   |
| SLC11A2  | -0,103945 | 0,247951  | <b>0,072003</b>  | 1602 | 2572 | <b>2087</b>   |
| PIF1     | 0,485226  | -0,340745 | <b>0,0722405</b> | 1997 | 3170 | <b>2583,5</b> |
| HSPA13   | 0,209848  | -0,06459  | <b>0,072629</b>  | 996  | 1631 | <b>1313,5</b> |
| PM20D2   | -0,394502 | 0,540821  | <b>0,0731595</b> | 1718 | 2225 | <b>1971,5</b> |
| ZNF79    | 0,073195  | NaN       | <b>0,073195</b>  | 1430 | NaN  | <b>1430</b>   |
| SPRYD7   | 0,286415  | -0,139969 | <b>0,073223</b>  | 2015 | 3173 | <b>2594</b>   |
| GGT7     | 0,112393  | 0,034117  | <b>0,073255</b>  | 1554 | 2125 | <b>1839,5</b> |
| MTCH2    | 0,22038   | -0,073732 | <b>0,073324</b>  | 1616 | 2006 | <b>1811</b>   |
| ATP13A4  | -1,039895 | 1,186579  | <b>0,073342</b>  | 1798 | 1741 | <b>1769,5</b> |
| CLEC4E   | 0,251462  | -0,104612 | <b>0,073425</b>  | 1713 | 1987 | <b>1850</b>   |
| ITGA5    | -0,102796 | 0,249838  | <b>0,073521</b>  | 1964 | 1932 | <b>1948</b>   |
| GADD45A  | -0,797945 | 0,945788  | <b>0,0739215</b> | 1222 | 1837 | <b>1529,5</b> |
| TCF4     | 0,796794  | -0,648811 | <b>0,0739915</b> | 1835 | 1839 | <b>1837</b>   |
| CCDC132  | 0,074028  | NaN       | <b>0,074028</b>  | 1824 | NaN  | <b>1824</b>   |
| SMARCAD1 | -0,12273  | 0,270969  | <b>0,0741195</b> | 1561 | 1825 | <b>1693</b>   |
| SCAMP2   | -0,906603 | 1,054888  | <b>0,0741425</b> | 1025 | 2042 | <b>1533,5</b> |
| HNRNPUL1 | 0,109036  | 0,039253  | <b>0,0741445</b> | 1550 | 1658 | <b>1604</b>   |
| SPAG16   | 0,07416   | NaN       | <b>0,07416</b>   | 1371 | NaN  | <b>1371</b>   |
| BARX2    | -0,062532 | 0,211146  | <b>0,074307</b>  | 1753 | 2064 | <b>1908,5</b> |
| SAAL1    | 1,026811  | -0,878181 | <b>0,074315</b>  | 1853 | 2024 | <b>1938,5</b> |
| EVI5     | 0,074532  | NaN       | <b>0,074532</b>  | 1538 | NaN  | <b>1538</b>   |

|          |           |           |                  |      |      |               |
|----------|-----------|-----------|------------------|------|------|---------------|
| PLA2R1   | 0,164238  | -0,015161 | <b>0,0745385</b> | 871  | 1409 | <b>1140</b>   |
| COX7A2L  | -0,119324 | 0,268977  | <b>0,0748265</b> | 1771 | 2711 | <b>2241</b>   |
| FAM46D   | 0,075088  | NaN       | <b>0,075088</b>  | 1656 | NaN  | <b>1656</b>   |
| MRPS26   | 0,512476  | -0,36207  | <b>0,075203</b>  | 1117 | 1126 | <b>1121,5</b> |
| C4orf14  | 0,438187  | -0,287722 | <b>0,0752325</b> | 1346 | 2210 | <b>1778</b>   |
| AADA2L   | -0,121765 | 0,272613  | <b>0,075424</b>  | 1575 | 1896 | <b>1735,5</b> |
| PARK2    | -0,462839 | 0,613967  | <b>0,075564</b>  | 1434 | 1937 | <b>1685,5</b> |
| TMEM50A  | 0,075836  | NaN       | <b>0,075836</b>  | 1307 | NaN  | <b>1307</b>   |
| C11orf85 | 0,011239  | 0,140707  | <b>0,075973</b>  | 1855 | 1798 | <b>1826,5</b> |
| TXNDC16  | 0,352369  | -0,200422 | <b>0,0759735</b> | 1411 | 2591 | <b>2001</b>   |
| ZNF223   | 0,389129  | -0,237151 | <b>0,075989</b>  | 1580 | 1953 | <b>1766,5</b> |
| LRRC4B   | 0,727918  | -0,575927 | <b>0,0759955</b> | 866  | 1085 | <b>975,5</b>  |
| CLK1     | -0,004151 | 0,156187  | <b>0,076018</b>  | 2142 | 2052 | <b>2097</b>   |
| DNM3     | -0,201291 | 0,354051  | <b>0,07638</b>   | 1712 | 2134 | <b>1923</b>   |
| CPT2     | -0,521872 | 0,674839  | <b>0,0764835</b> | 1276 | 1104 | <b>1190</b>   |
| CDX2     | -0,384252 | 0,537526  | <b>0,076637</b>  | 2192 | 2845 | <b>2518,5</b> |
| INADL    | 0,528641  | -0,375313 | <b>0,076664</b>  | 2056 | 3225 | <b>2640,5</b> |
| ZCCHC6   | 0,077245  | NaN       | <b>0,077245</b>  | 1951 | NaN  | <b>1951</b>   |
| FYCO1    | -0,721298 | 0,876143  | <b>0,0774225</b> | 1049 | 1252 | <b>1150,5</b> |
| RPL7     | 0,422339  | -0,267426 | <b>0,0774565</b> | 1052 | 954  | <b>1003</b>   |
| C7orf16  | -0,681267 | 0,836437  | <b>0,077585</b>  | 862  | 1192 | <b>1027</b>   |
| CNFN     | 0,592594  | -0,437227 | <b>0,0776835</b> | 1490 | 1608 | <b>1549</b>   |
| RGS7     | 0,946583  | -0,791093 | <b>0,077745</b>  | 964  | 1842 | <b>1403</b>   |
| WDR59    | -0,056195 | 0,211765  | <b>0,077785</b>  | 2193 | 2795 | <b>2494</b>   |
| COX7B2   | 0,62789   | -0,47228  | <b>0,077805</b>  | 1718 | 1952 | <b>1835</b>   |
| CTXN3    | -0,342585 | 0,498963  | <b>0,078189</b>  | 1638 | 1946 | <b>1792</b>   |
| PCNT     | -0,19278  | 0,349163  | <b>0,0781915</b> | 1290 | 1206 | <b>1248</b>   |
| CD247    | 0,525308  | -0,368803 | <b>0,0782525</b> | 1959 | 2257 | <b>2108</b>   |
| YBX2     | 0,049379  | 0,107571  | <b>0,078475</b>  | 1757 | 1610 | <b>1683,5</b> |
| ZC4H2    | -0,031408 | 0,188552  | <b>0,078572</b>  | 1725 | 2682 | <b>2203,5</b> |
| FOXO4    | 0,110064  | 0,047508  | <b>0,078786</b>  | 1256 | 2212 | <b>1734</b>   |
| TRPV4    | 0,230012  | -0,072409 | <b>0,0788015</b> | 1034 | 2040 | <b>1537</b>   |
| CAMKK1   | -0,352483 | 0,510704  | <b>0,0791105</b> | 1934 | 1656 | <b>1795</b>   |
| SAMD14   | 0,079325  | NaN       | <b>0,079325</b>  | 1552 | NaN  | <b>1552</b>   |

|          |           |           |                  |      |      |               |
|----------|-----------|-----------|------------------|------|------|---------------|
| PPT1     | 0,326834  | -0,168121 | <b>0,0793565</b> | 1072 | 1923 | <b>1497,5</b> |
| AQP4     | -0,944678 | 1,103455  | <b>0,0793885</b> | 1928 | 1953 | <b>1940,5</b> |
| H2AFX    | 0,273567  | -0,11465  | <b>0,0794585</b> | 1461 | 1976 | <b>1718,5</b> |
| U2SURP   | 0,667585  | -0,508516 | <b>0,0795345</b> | 1389 | 1406 | <b>1397,5</b> |
| CCDC108  | 0,079608  | NaN       | <b>0,079608</b>  | 1498 | NaN  | <b>1498</b>   |
| SHKBP1   | -0,216797 | 0,376127  | <b>0,079665</b>  | 1577 | 1519 | <b>1548</b>   |
| TAZ      | -0,026961 | 0,186377  | <b>0,079708</b>  | 1299 | 2285 | <b>1792</b>   |
| VSIG8    | -0,132242 | 0,291742  | <b>0,07975</b>   | 1590 | 2415 | <b>2002,5</b> |
| ZNF544   | 0,079868  | NaN       | <b>0,079868</b>  | 1900 | NaN  | <b>1900</b>   |
| TBC1D9   | -0,265318 | 0,425276  | <b>0,079979</b>  | 2072 | 2156 | <b>2114</b>   |
| NR2F2    | 0,045211  | 0,114954  | <b>0,0800825</b> | 1892 | 2051 | <b>1971,5</b> |
| FAM5B    | 0,080096  | NaN       | <b>0,080096</b>  | 1458 | NaN  | <b>1458</b>   |
| ZBTB26   | -0,174475 | 0,335011  | <b>0,080268</b>  | 1668 | 1742 | <b>1705</b>   |
| ACTL8    | -0,064885 | 0,225838  | <b>0,0804765</b> | 1973 | 2224 | <b>2098,5</b> |
| PSPC1    | 0,063114  | 0,09877   | <b>0,080942</b>  | 1465 | 1861 | <b>1663</b>   |
| CKM      | 0,197795  | -0,03591  | <b>0,0809425</b> | 1508 | 1607 | <b>1557,5</b> |
| ETV3     | -0,95392  | 1,117101  | <b>0,0815905</b> | 1032 | 1824 | <b>1428</b>   |
| ROGDI    | -0,436105 | 0,599503  | <b>0,081699</b>  | 1475 | 1779 | <b>1627</b>   |
| CDH16    | 0,851774  | -0,688054 | <b>0,08186</b>   | 1416 | 2367 | <b>1891,5</b> |
| KRT84    | 0,081885  | NaN       | <b>0,081885</b>  | 1355 | NaN  | <b>1355</b>   |
| MTMR11   | -0,116686 | 0,281226  | <b>0,08227</b>   | 1800 | 2694 | <b>2247</b>   |
| GNG12    | 0,417138  | -0,251572 | <b>0,082783</b>  | 1741 | 2182 | <b>1961,5</b> |
| RNF217   | -0,622435 | 0,788034  | <b>0,0827995</b> | 1770 | 2157 | <b>1963,5</b> |
| PRSS36   | -0,164533 | 0,330398  | <b>0,0829325</b> | 2093 | 2202 | <b>2147,5</b> |
| MYOM3    | -0,091965 | 0,25814   | <b>0,0830875</b> | 1134 | 1280 | <b>1207</b>   |
| CABLES2  | 0,509152  | -0,342486 | <b>0,083333</b>  | 2069 | 2718 | <b>2393,5</b> |
| HOXD10   | 0,500106  | -0,333335 | <b>0,0833855</b> | 860  | 1717 | <b>1288,5</b> |
| SEMG1    | 0,523966  | -0,357152 | <b>0,083407</b>  | 843  | 2027 | <b>1435</b>   |
| SIAH3    | 0,741624  | -0,574719 | <b>0,0834525</b> | 1729 | 2021 | <b>1875</b>   |
| MOCS2    | NaN       | 0,083523  | <b>0,083523</b>  | NaN  | 1970 | <b>1970</b>   |
| GATA6    | -0,708197 | 0,875614  | <b>0,0837085</b> | 1777 | 1828 | <b>1802,5</b> |
| GTDC1    | 0,08372   | NaN       | <b>0,08372</b>   | 1543 | NaN  | <b>1543</b>   |
| C14orf93 | 0,284582  | -0,116792 | <b>0,083895</b>  | 1520 | 1897 | <b>1708,5</b> |
| GPR119   | 0,083919  | NaN       | <b>0,083919</b>  | 1387 | NaN  | <b>1387</b>   |

|           |           |           |                  |      |      |               |
|-----------|-----------|-----------|------------------|------|------|---------------|
| LUC7L2    | 0,084011  | NaN       | <b>0,084011</b>  | 1328 | NaN  | <b>1328</b>   |
| KCNH6     | -0,130447 | 0,29849   | <b>0,0840215</b> | 1255 | 2002 | <b>1628,5</b> |
| MYO1C     | 0,084228  | NaN       | <b>0,084228</b>  | 1596 | NaN  | <b>1596</b>   |
| HPS3      | -0,057554 | 0,226456  | <b>0,084451</b>  | 1721 | 2409 | <b>2065</b>   |
| MLST8     | 0,66114   | -0,492073 | <b>0,0845335</b> | 1095 | 1423 | <b>1259</b>   |
| CBX1      | 1,100674  | -0,931535 | <b>0,0845695</b> | 1571 | 2145 | <b>1858</b>   |
| TIMM17B   | 0,574544  | -0,4051   | <b>0,084722</b>  | 1602 | 2140 | <b>1871</b>   |
| CFH       | 0,084833  | NaN       | <b>0,084833</b>  | 1867 | NaN  | <b>1867</b>   |
| HNRNPL    | 0,085114  | NaN       | <b>0,085114</b>  | 1425 | NaN  | <b>1425</b>   |
| DMXL2     | -1,583773 | 1,754042  | <b>0,0851345</b> | 1447 | 2179 | <b>1813</b>   |
| MGLL      | 0,994458  | -0,823727 | <b>0,0853655</b> | 1403 | 1827 | <b>1615</b>   |
| CCDC57    | 0,085773  | NaN       | <b>0,085773</b>  | 1563 | NaN  | <b>1563</b>   |
| EVI5L     | 0,085833  | NaN       | <b>0,085833</b>  | 1583 | NaN  | <b>1583</b>   |
| IL12B     | -0,21132  | 0,383278  | <b>0,085979</b>  | 1516 | 2131 | <b>1823,5</b> |
| SVEP1     | 0,086036  | NaN       | <b>0,086036</b>  | 1550 | NaN  | <b>1550</b>   |
| CDH9      | -0,31768  | 0,489957  | <b>0,0861385</b> | 1860 | 1723 | <b>1791,5</b> |
| LAPTM4A   | -0,01228  | 0,184563  | <b>0,0861415</b> | 1713 | 1912 | <b>1812,5</b> |
| OR2AK2    | 0,264659  | -0,09236  | <b>0,0861495</b> | 1837 | 2028 | <b>1932,5</b> |
| HIST1H2AH | 0,086153  | NaN       | <b>0,086153</b>  | 1612 | NaN  | <b>1612</b>   |
| UNC93A    | 0,093094  | 0,079646  | <b>0,08637</b>   | 1813 | 2064 | <b>1938,5</b> |
| SPON1     | 1,065193  | -0,892239 | <b>0,086477</b>  | 1578 | 1368 | <b>1473</b>   |
| C4orf39   | 0,85169   | -0,678489 | <b>0,0866005</b> | 1516 | 2397 | <b>1956,5</b> |
| C1QL4     | 0,086646  | NaN       | <b>0,086646</b>  | 1833 | NaN  | <b>1833</b>   |
| CLIC6     | 0,550338  | -0,37685  | <b>0,086744</b>  | 1951 | 1974 | <b>1962,5</b> |
| FRMD7     | 0,729657  | -0,555792 | <b>0,0869325</b> | 2060 | 2271 | <b>2165,5</b> |
| MIB1      | 0,542963  | -0,368728 | <b>0,0871175</b> | 2134 | 2880 | <b>2507</b>   |
| DPP8      | -0,321025 | 0,495398  | <b>0,0871865</b> | 2085 | 2509 | <b>2297</b>   |
| POLRMT    | 0,268901  | -0,094388 | <b>0,0872565</b> | 1284 | 1677 | <b>1480,5</b> |
| KLF14     | 0,087364  | NaN       | <b>0,087364</b>  | 1129 | NaN  | <b>1129</b>   |
| C14orf183 | -0,252079 | 0,427364  | <b>0,0876425</b> | 1892 | 3142 | <b>2517</b>   |
| FKBP11    | -0,13246  | 0,307926  | <b>0,087733</b>  | 1034 | 1501 | <b>1267,5</b> |
| TMEM170A  | 0,651942  | -0,476434 | <b>0,087754</b>  | 1686 | 2057 | <b>1871,5</b> |
| LRRC23    | 0,08776   | NaN       | <b>0,08776</b>   | 1748 | NaN  | <b>1748</b>   |
| PLAA      | 0,582687  | -0,406347 | <b>0,08817</b>   | 1088 | 2172 | <b>1630</b>   |

|         |           |           |                  |      |      |               |
|---------|-----------|-----------|------------------|------|------|---------------|
| BHLHE41 | 0,397081  | -0,220532 | <b>0,0882745</b> | 1702 | 2370 | <b>2036</b>   |
| TMEM39A | 0,088372  | NaN       | <b>0,088372</b>  | 1378 | NaN  | <b>1378</b>   |
| RGAG1   | 0,088457  | NaN       | <b>0,088457</b>  | 1831 | NaN  | <b>1831</b>   |
| DAP     | 0,597005  | -0,419887 | <b>0,088559</b>  | 1824 | 2077 | <b>1950,5</b> |
| GPR82   | 0,088726  | NaN       | <b>0,088726</b>  | 1642 | NaN  | <b>1642</b>   |
| DUSP2   | 0,239529  | -0,062068 | <b>0,0887305</b> | 1666 | 2294 | <b>1980</b>   |
| RSRC2   | 0,322335  | -0,144819 | <b>0,088758</b>  | 1913 | 2592 | <b>2252,5</b> |
| MED30   | -0,700414 | 0,87796   | <b>0,088773</b>  | 1234 | 1906 | <b>1570</b>   |
| IQCG    | 0,089174  | NaN       | <b>0,089174</b>  | 1834 | NaN  | <b>1834</b>   |
| PRSS16  | -0,644081 | 0,823117  | <b>0,089518</b>  | 1467 | 2067 | <b>1767</b>   |
| PNKD    | -0,450529 | 0,630228  | <b>0,0898495</b> | 1665 | 2050 | <b>1857,5</b> |
| SELV    | 0,139193  | 0,040809  | <b>0,090001</b>  | 1774 | 2289 | <b>2031,5</b> |
| REST    | 0,001601  | 0,179011  | <b>0,090306</b>  | 1981 | 2322 | <b>2151,5</b> |
| PRIC285 | 0,541226  | -0,36058  | <b>0,090323</b>  | 1322 | 2041 | <b>1681,5</b> |
| PRSS55  | 0,451043  | -0,270353 | <b>0,090345</b>  | 1543 | 1579 | <b>1561</b>   |
| ARRB1   | 0,81596   | -0,635104 | <b>0,090428</b>  | 1198 | 1614 | <b>1406</b>   |
| OVCH1   | -0,134258 | 0,315667  | <b>0,0907045</b> | 2156 | 2411 | <b>2283,5</b> |
| ZNF627  | 0,525413  | -0,343686 | <b>0,0908635</b> | 2111 | 2093 | <b>2102</b>   |
| MSMB    | -0,799615 | 0,981535  | <b>0,09096</b>   | 1677 | 1467 | <b>1572</b>   |
| OR5AP2  | 0,50772   | -0,325762 | <b>0,090979</b>  | 1386 | 1505 | <b>1445,5</b> |
| DBNDD1  | 0,592815  | -0,410812 | <b>0,0910015</b> | 1567 | 2348 | <b>1957,5</b> |
| ESRP1   | 1,157264  | -0,974195 | <b>0,0915345</b> | 1494 | 2240 | <b>1867</b>   |
| KIF1B   | -0,195641 | 0,378961  | <b>0,09166</b>   | 1768 | 2234 | <b>2001</b>   |
| COPS2   | NaN       | 0,091701  | <b>0,091701</b>  | NaN  | 2675 | <b>2675</b>   |
| FOXA1   | -1,057817 | 1,241439  | <b>0,091811</b>  | 1992 | 2717 | <b>2354,5</b> |
| KLK11   | 0,197873  | -0,01323  | <b>0,0923215</b> | 1722 | 2063 | <b>1892,5</b> |
| PLA2G2E | 0,361247  | -0,176419 | <b>0,092414</b>  | 1523 | 2038 | <b>1780,5</b> |
| ABCC10  | -0,232075 | 0,417142  | <b>0,0925335</b> | 2077 | 2386 | <b>2231,5</b> |
| OTOP2   | -0,342178 | 0,527585  | <b>0,0927035</b> | 1773 | 2429 | <b>2101</b>   |
| GLT8D2  | 0,576103  | -0,390492 | <b>0,0928055</b> | 1673 | 1686 | <b>1679,5</b> |
| PRR19   | -0,12689  | 0,312506  | <b>0,092808</b>  | 2128 | 2565 | <b>2346,5</b> |
| BCL6    | -0,111953 | 0,298076  | <b>0,0930615</b> | 1890 | 1800 | <b>1845</b>   |
| KDM4D   | 0,301595  | -0,114883 | <b>0,093356</b>  | 1840 | 1508 | <b>1674</b>   |
| AIMP1   | 0,093609  | NaN       | <b>0,093609</b>  | 1202 | NaN  | <b>1202</b>   |



|           |           |           |                  |      |      |               |
|-----------|-----------|-----------|------------------|------|------|---------------|
| TUBB4     | 0,436147  | -0,248729 | <b>0,093709</b>  | 1510 | 1959 | <b>1734,5</b> |
| TULP1     | -0,053489 | 0,241003  | <b>0,093757</b>  | 1678 | 2311 | <b>1994,5</b> |
| KIAA0907  | 1,002809  | -0,815077 | <b>0,093866</b>  | 1259 | 1766 | <b>1512,5</b> |
| DDX52     | 0,355488  | -0,167335 | <b>0,0940765</b> | 1472 | 1796 | <b>1634</b>   |
| MRPL32    | -0,195243 | 0,383985  | <b>0,094371</b>  | 2082 | 2156 | <b>2119</b>   |
| RRNAD1    | 0,370439  | -0,180901 | <b>0,094769</b>  | 1654 | 1752 | <b>1703</b>   |
| HRCT1     | -0,786443 | 0,977256  | <b>0,0954065</b> | 1630 | 1429 | <b>1529,5</b> |
| UQCRC1    | -0,080915 | 0,271997  | <b>0,095541</b>  | 1318 | 1333 | <b>1325,5</b> |
| G3BP2     | 0,954168  | -0,761956 | <b>0,096106</b>  | 1587 | 2369 | <b>1978</b>   |
| KRTAP5-11 | 0,714291  | -0,521951 | <b>0,09617</b>   | 1431 | 1856 | <b>1643,5</b> |
| SMG9      | 0,096344  | NaN       | <b>0,096344</b>  | 1507 | NaN  | <b>1507</b>   |
| DNMBP     | 0,096366  | NaN       | <b>0,096366</b>  | 1474 | NaN  | <b>1474</b>   |
| MEF2D     | 0,127099  | 0,065873  | <b>0,096486</b>  | 1883 | 1952 | <b>1917,5</b> |
| LRP12     | -1,09544  | 1,288422  | <b>0,096491</b>  | 1438 | 1733 | <b>1585,5</b> |
| ISL1      | 0,444147  | -0,251053 | <b>0,096547</b>  | 1527 | 2418 | <b>1972,5</b> |
| CD96      | 1,480335  | -1,287152 | <b>0,0965915</b> | 2025 | 2083 | <b>2054</b>   |
| TBKBP1    | 0,096669  | NaN       | <b>0,096669</b>  | 1456 | NaN  | <b>1456</b>   |
| WLS       | 1,050632  | -0,857001 | <b>0,0968155</b> | 1852 | 2548 | <b>2200</b>   |
| FADD      | -0,10963  | 0,303445  | <b>0,0969075</b> | 1933 | 1632 | <b>1782,5</b> |
| FOXRED2   | 0,497555  | -0,30331  | <b>0,0971225</b> | 1913 | 2131 | <b>2022</b>   |
| ALG6      | 0,713493  | -0,516946 | <b>0,0982735</b> | 1542 | 2246 | <b>1894</b>   |
| TM4SF4    | 0,064634  | 0,132283  | <b>0,0984585</b> | 1210 | 1822 | <b>1516</b>   |
| FSTL5     | 0,098522  | NaN       | <b>0,098522</b>  | 1646 | NaN  | <b>1646</b>   |
| ZNF616    | -0,022682 | 0,220232  | <b>0,098775</b>  | 1461 | 1683 | <b>1572</b>   |
| CASP9     | 0,022025  | 0,175721  | <b>0,098873</b>  | 2164 | 2206 | <b>2185</b>   |
| ILF3      | NaN       | 0,099368  | <b>0,099368</b>  | NaN  | 1561 | <b>1561</b>   |
| EPT1      | 0,600937  | -0,401995 | <b>0,099471</b>  | 1928 | 2053 | <b>1990,5</b> |
| C17orf101 | -0,552591 | 0,751629  | <b>0,099519</b>  | 1687 | 1914 | <b>1800,5</b> |
| SEMA6A    | 0,099538  | NaN       | <b>0,099538</b>  | 1971 | NaN  | <b>1971</b>   |
| SENP2     | -0,272189 | 0,47211   | <b>0,0999605</b> | 1995 | 1528 | <b>1761,5</b> |
| CHAC1     | -0,434588 | 0,634824  | <b>0,100118</b>  | 2111 | 2352 | <b>2231,5</b> |
| PSD2      | 0,100476  | NaN       | <b>0,100476</b>  | 1710 | NaN  | <b>1710</b>   |
| PGM2      | 0,459892  | -0,258731 | <b>0,1005805</b> | 1121 | 1691 | <b>1406</b>   |
| TMOD1     | 0,222801  | -0,021566 | <b>0,1006175</b> | 1309 | 1743 | <b>1526</b>   |

|         |           |           |                  |      |      |               |
|---------|-----------|-----------|------------------|------|------|---------------|
| GRIK4   | 0,767922  | -0,566617 | <b>0,1006525</b> | 1101 | 1929 | <b>1515</b>   |
| FLOT2   | 0,065396  | 0,136058  | <b>0,100727</b>  | 1604 | 1976 | <b>1790</b>   |
| SDHAF2  | 0,21352   | -0,011685 | <b>0,1009175</b> | 1817 | 2037 | <b>1927</b>   |
| C7orf10 | -0,511501 | 0,713546  | <b>0,1010225</b> | 1944 | 2016 | <b>1980</b>   |
| CDK8    | 0,138578  | 0,063498  | <b>0,101038</b>  | 2014 | 2117 | <b>2065,5</b> |
| ZIC5    | 0,101141  | NaN       | <b>0,101141</b>  | 1610 | NaN  | <b>1610</b>   |
| CNRIP1  | 0,049045  | 0,153489  | <b>0,101267</b>  | 1906 | 2903 | <b>2404,5</b> |
| ST3GAL5 | -0,626175 | 0,829233  | <b>0,101529</b>  | 1518 | 1519 | <b>1518,5</b> |
| DNHD1   | 0,011071  | 0,192063  | <b>0,101567</b>  | 1494 | 1903 | <b>1698,5</b> |
| PLCD4   | 0,716706  | -0,513498 | <b>0,101604</b>  | 1050 | 1312 | <b>1181</b>   |
| SLC11A1 | 0,53983   | -0,336404 | <b>0,101713</b>  | 1884 | 2820 | <b>2352</b>   |
| MSH3    | 0,720687  | -0,51674  | <b>0,1019735</b> | 1770 | 2258 | <b>2014</b>   |
| CYP26A1 | 0,594412  | -0,390417 | <b>0,1019975</b> | 1484 | 2197 | <b>1840,5</b> |
| BAIAP2  | 0,097785  | 0,106406  | <b>0,1020955</b> | 1827 | 2017 | <b>1922</b>   |
| GFOD2   | 0,195435  | 0,008796  | <b>0,1021155</b> | 1234 | 1510 | <b>1372</b>   |
| CBS     | -0,768856 | 0,973173  | <b>0,1021585</b> | 823  | 1469 | <b>1146</b>   |
| TBC1D1  | 0,311092  | -0,106555 | <b>0,1022685</b> | 2169 | 2299 | <b>2234</b>   |
| POU3F3  | 0,496242  | -0,291568 | <b>0,102337</b>  | 777  | 1177 | <b>977</b>    |
| RRP15   | 0,369575  | -0,164694 | <b>0,1024405</b> | 1925 | 2481 | <b>2203</b>   |
| TEX13B  | 0,16049   | 0,04447   | <b>0,10248</b>   | 1379 | 1874 | <b>1626,5</b> |
| WDHD1   | -0,111823 | 0,31746   | <b>0,1028185</b> | 1769 | 1968 | <b>1868,5</b> |
| IRF2BPL | 0,186477  | 0,019248  | <b>0,1028625</b> | 2073 | 2327 | <b>2200</b>   |
| FAAH    | 0,232574  | -0,026496 | <b>0,103039</b>  | 1636 | 2025 | <b>1830,5</b> |
| GIMAP8  | 0,10309   | NaN       | <b>0,10309</b>   | 1270 | NaN  | <b>1270</b>   |
| ACP1    | -0,120222 | 0,326443  | <b>0,1031105</b> | 1840 | 2689 | <b>2264,5</b> |
| NICN1   | -0,389185 | 0,595565  | <b>0,10319</b>   | 1309 | 1953 | <b>1631</b>   |
| CDYL2   | 0,06855   | 0,138208  | <b>0,103379</b>  | 1458 | 1697 | <b>1577,5</b> |
| KCNC2   | 0,321397  | -0,114617 | <b>0,10339</b>   | 1355 | 1903 | <b>1629</b>   |
| MAGEB3  | 0,207047  | 0,000934  | <b>0,1039905</b> | 1688 | 2117 | <b>1902,5</b> |
| IQCE    | -0,501198 | 0,709309  | <b>0,1040555</b> | 1585 | 1916 | <b>1750,5</b> |
| HCN1    | 0,667371  | -0,458422 | <b>0,1044745</b> | 1489 | 2188 | <b>1838,5</b> |
| CD300LD | 0,010966  | 0,198292  | <b>0,104629</b>  | 1772 | 1812 | <b>1792</b>   |
| RCBTB1  | 0,807258  | -0,597358 | <b>0,10495</b>   | 1866 | 1574 | <b>1720</b>   |
| RAB42   | 0,366078  | -0,156161 | <b>0,1049585</b> | 1612 | 2024 | <b>1818</b>   |

|          |           |           |                  |      |      |               |
|----------|-----------|-----------|------------------|------|------|---------------|
| NHLH2    | 0,384958  | -0,174797 | <b>0,1050805</b> | 1917 | 2126 | <b>2021,5</b> |
| TLL2     | -0,336694 | 0,547211  | <b>0,1052585</b> | 1372 | 1695 | <b>1533,5</b> |
| GHRL     | 0,782157  | -0,571213 | <b>0,105472</b>  | 906  | 1548 | <b>1227</b>   |
| PCDHGA6  | 0,070948  | 0,140152  | <b>0,10555</b>   | 1722 | 2037 | <b>1879,5</b> |
| NDUFB4   | 1,407037  | -1,195849 | <b>0,105594</b>  | 1549 | 1596 | <b>1572,5</b> |
| TRAF6    | 0,328379  | -0,116861 | <b>0,105759</b>  | 1721 | 2515 | <b>2118</b>   |
| GKAP1    | 0,145452  | 0,066383  | <b>0,1059175</b> | 1273 | 1721 | <b>1497</b>   |
| MED12    | -0,260576 | 0,472526  | <b>0,105975</b>  | 1688 | 2441 | <b>2064,5</b> |
| TEK      | 0,009435  | 0,202787  | <b>0,106111</b>  | 1658 | 1976 | <b>1817</b>   |
| INSM2    | -0,71182  | 0,924386  | <b>0,106283</b>  | 1616 | 1371 | <b>1493,5</b> |
| OR10AD1  | 0,106927  | NaN       | <b>0,106927</b>  | 1572 | NaN  | <b>1572</b>   |
| NUAK2    | 0,339564  | -0,12478  | <b>0,107392</b>  | 1088 | 2133 | <b>1610,5</b> |
| ATP5I    | 0,449017  | -0,23414  | <b>0,1074385</b> | 1978 | 2173 | <b>2075,5</b> |
| INPP5B   | -0,185244 | 0,400643  | <b>0,1076995</b> | 1832 | 2630 | <b>2231</b>   |
| AP4S1    | 0,440701  | -0,225164 | <b>0,1077685</b> | 1687 | 2268 | <b>1977,5</b> |
| TMEM190  | -0,055782 | 0,271815  | <b>0,1080165</b> | 1741 | 1745 | <b>1743</b>   |
| GEM      | 0,260337  | -0,044209 | <b>0,108064</b>  | 1578 | 2470 | <b>2024</b>   |
| ZNF701   | -0,230591 | 0,447057  | <b>0,108233</b>  | 2032 | 1837 | <b>1934,5</b> |
| DCDC2    | 0,108291  | NaN       | <b>0,108291</b>  | 1644 | NaN  | <b>1644</b>   |
| CD300LF  | 0,570358  | -0,353547 | <b>0,1084055</b> | 1094 | 1784 | <b>1439</b>   |
| RHBDF2   | 0,108445  | NaN       | <b>0,108445</b>  | 1550 | NaN  | <b>1550</b>   |
| ZZEF1    | 0,174964  | 0,042494  | <b>0,108729</b>  | 2104 | 1900 | <b>2002</b>   |
| PRTN3    | 0,350368  | -0,132604 | <b>0,108882</b>  | 1062 | 2242 | <b>1652</b>   |
| ANKRD34B | 0,156548  | 0,061232  | <b>0,10889</b>   | 2079 | 1880 | <b>1979,5</b> |
| PSMB6    | -0,29609  | 0,513947  | <b>0,1089285</b> | 935  | 1777 | <b>1356</b>   |
| CD1A     | 0,603541  | -0,385231 | <b>0,109155</b>  | 1179 | 2292 | <b>1735,5</b> |
| PTPN1    | 0,131235  | 0,087245  | <b>0,10924</b>   | 2046 | 2546 | <b>2296</b>   |
| TAF6L    | NaN       | 0,109408  | <b>0,109408</b>  | NaN  | 1969 | <b>1969</b>   |
| TOE1     | -0,662473 | 0,881373  | <b>0,10945</b>   | 1828 | 2893 | <b>2360,5</b> |
| CHDH     | 0,563257  | -0,343883 | <b>0,109687</b>  | 1139 | 1506 | <b>1322,5</b> |
| SYNPO2   | 0,685952  | -0,466254 | <b>0,109849</b>  | 1630 | 1468 | <b>1549</b>   |
| ANO7     | 0,463746  | -0,24289  | <b>0,110428</b>  | 1475 | 2107 | <b>1791</b>   |
| ZNF593   | -0,295274 | 0,516447  | <b>0,1105865</b> | 1824 | 1138 | <b>1481</b>   |
| IL6R     | -0,466211 | 0,687898  | <b>0,1108435</b> | 1289 | 2102 | <b>1695,5</b> |

|           |           |           |                  |      |      |               |
|-----------|-----------|-----------|------------------|------|------|---------------|
| HPRT1     | 0,430926  | -0,209089 | <b>0,1109185</b> | 1080 | 1593 | <b>1336,5</b> |
| MAP2      | -0,580479 | 0,802427  | <b>0,110974</b>  | 546  | 919  | <b>732,5</b>  |
| RPGRIP1L  | -0,577559 | 0,799619  | <b>0,11103</b>   | 2198 | 2116 | <b>2157</b>   |
| INTU      | 0,111235  | NaN       | <b>0,111235</b>  | 939  | NaN  | <b>939</b>    |
| DNASE2B   | 1,034542  | -0,811757 | <b>0,1113925</b> | 1650 | 1518 | <b>1584</b>   |
| CXorf48   | 0,11143   | NaN       | <b>0,11143</b>   | 1867 | NaN  | <b>1867</b>   |
| ELMOD3    | 0,408206  | -0,184263 | <b>0,1119715</b> | 1474 | 2535 | <b>2004,5</b> |
| TSSK6     | 0,739816  | -0,51571  | <b>0,112053</b>  | 2203 | 2228 | <b>2215,5</b> |
| SMS       | 1,024503  | -0,799335 | <b>0,112584</b>  | 1474 | 1896 | <b>1685</b>   |
| AFAP1     | 0,735956  | -0,510432 | <b>0,112762</b>  | 1722 | 2024 | <b>1873</b>   |
| TMPRSS13  | 1,140048  | -0,914293 | <b>0,1128775</b> | 1568 | 2085 | <b>1826,5</b> |
| IDE       | 0,140579  | 0,085337  | <b>0,112958</b>  | 2086 | 2219 | <b>2152,5</b> |
| PTPRK     | 0,339105  | -0,112831 | <b>0,113137</b>  | 1301 | 2374 | <b>1837,5</b> |
| PRKCQ     | -0,639039 | 0,8655    | <b>0,1132305</b> | 2032 | 1991 | <b>2011,5</b> |
| TNFRSF11B | -0,053436 | 0,280006  | <b>0,113285</b>  | 1842 | 2166 | <b>2004</b>   |
| SPESP1    | 0,137416  | 0,089178  | <b>0,113297</b>  | 1913 | 1934 | <b>1923,5</b> |
| ABCA10    | 0,667857  | -0,441072 | <b>0,1133925</b> | 1739 | 2134 | <b>1936,5</b> |
| ZMAT3     | -0,040772 | 0,268352  | <b>0,11379</b>   | 1765 | 2194 | <b>1979,5</b> |
| PRKACB    | -0,340052 | 0,567777  | <b>0,1138625</b> | 2046 | 1688 | <b>1867</b>   |
| C10orf68  | -0,215007 | 0,442848  | <b>0,1139205</b> | 1249 | 1594 | <b>1421,5</b> |
| ARNT2     | -0,064006 | 0,292105  | <b>0,1140495</b> | 1727 | 2285 | <b>2006</b>   |
| ERP44     | 0,85019   | -0,622001 | <b>0,1140945</b> | 1190 | 1838 | <b>1514</b>   |
| RAE1      | 0,575415  | -0,347084 | <b>0,1141655</b> | 1412 | 1994 | <b>1703</b>   |
| ST8SIA5   | -0,084928 | 0,313422  | <b>0,114247</b>  | 1985 | 3132 | <b>2558,5</b> |
| KRTAP10-8 | 0,114495  | NaN       | <b>0,114495</b>  | 1268 | NaN  | <b>1268</b>   |
| CRYGN     | 0,114573  | NaN       | <b>0,114573</b>  | 1408 | NaN  | <b>1408</b>   |
| C3orf19   | 0,336427  | -0,107183 | <b>0,114622</b>  | 1587 | 1898 | <b>1742,5</b> |
| PRSS23    | -0,447629 | 0,676875  | <b>0,114623</b>  | 1680 | 2220 | <b>1950</b>   |
| SIPA1L2   | -0,314093 | 0,544438  | <b>0,1151725</b> | 1486 | 1428 | <b>1457</b>   |
| USP3      | -0,648723 | 0,879173  | <b>0,115225</b>  | 1489 | 2082 | <b>1785,5</b> |
| TRIM27    | 0,158332  | 0,072198  | <b>0,115265</b>  | 1488 | 1772 | <b>1630</b>   |
| RELL1     | 0,11527   | NaN       | <b>0,11527</b>   | 1902 | NaN  | <b>1902</b>   |
| STK16     | 0,257698  | -0,026628 | <b>0,115535</b>  | 1093 | 1641 | <b>1367</b>   |
| DBH       | -0,135502 | 0,366816  | <b>0,115657</b>  | 1837 | 1940 | <b>1888,5</b> |

|          |           |           |                  |      |      |               |
|----------|-----------|-----------|------------------|------|------|---------------|
| WDR24    | -0,511238 | 0,742568  | <b>0,115665</b>  | 1491 | 2742 | <b>2116,5</b> |
| TRIM6    | 0,760908  | -0,527716 | <b>0,116596</b>  | 1464 | 1881 | <b>1672,5</b> |
| ARHGAP28 | -0,919166 | 1,152535  | <b>0,1166845</b> | 1807 | 1739 | <b>1773</b>   |
| SELE     | 0,116977  | NaN       | <b>0,116977</b>  | 1434 | NaN  | <b>1434</b>   |
| CCDC59   | 0,617429  | -0,382863 | <b>0,117283</b>  | 1710 | 2053 | <b>1881,5</b> |
| SETD8    | -0,339925 | 0,57465   | <b>0,1173625</b> | 1891 | 1976 | <b>1933,5</b> |
| CRISP3   | 0,404595  | -0,169281 | <b>0,117657</b>  | 1874 | 2479 | <b>2176,5</b> |
| CARS     | 0,290213  | -0,054862 | <b>0,1176755</b> | 1445 | 2021 | <b>1733</b>   |
| SNAP91   | 0,06379   | 0,172448  | <b>0,118119</b>  | 2043 | 2392 | <b>2217,5</b> |
| STK32A   | 0,30713   | -0,070625 | <b>0,1182525</b> | 1745 | 2583 | <b>2164</b>   |
| GPR84    | 0,118312  | NaN       | <b>0,118312</b>  | 874  | NaN  | <b>874</b>    |
| ZKSCAN3  | 0,373287  | -0,136638 | <b>0,1183245</b> | 1882 | 2362 | <b>2122</b>   |
| RBM10    | -0,636225 | 0,872976  | <b>0,1183755</b> | 1833 | 2007 | <b>1920</b>   |
| FAM60A   | 0,769873  | -0,532732 | <b>0,1185705</b> | 2302 | 3082 | <b>2692</b>   |
| PEAR1    | 0,39485   | -0,157409 | <b>0,1187205</b> | 1311 | 1662 | <b>1486,5</b> |
| TFAP2B   | 0,589877  | -0,351811 | <b>0,119033</b>  | 1930 | 1886 | <b>1908</b>   |
| P4HA3    | -0,59318  | 0,831502  | <b>0,119161</b>  | 1651 | 1538 | <b>1594,5</b> |
| MAMLD1   | 0,119188  | NaN       | <b>0,119188</b>  | 2041 | NaN  | <b>2041</b>   |
| CYP19A1  | -0,293345 | 0,532804  | <b>0,1197295</b> | 853  | 1811 | <b>1332</b>   |
| CHI3L2   | 0,599712  | -0,36025  | <b>0,119731</b>  | 2123 | 2714 | <b>2418,5</b> |
| ABCA2    | -0,137563 | 0,377649  | <b>0,120043</b>  | 1706 | 2122 | <b>1914</b>   |
| LMTK2    | 0,184782  | 0,056856  | <b>0,120819</b>  | 1828 | 2381 | <b>2104,5</b> |
| TBC1D10B | 0,59234   | -0,350371 | <b>0,1209845</b> | 2110 | 2092 | <b>2101</b>   |
| ARL1     | 0,37545   | -0,13338  | <b>0,121035</b>  | 1732 | 2966 | <b>2349</b>   |
| BSPRY    | 0,080051  | 0,162602  | <b>0,1213265</b> | 1124 | 2360 | <b>1742</b>   |
| SLC5A6   | -1,178469 | 1,421129  | <b>0,12133</b>   | 1583 | 1845 | <b>1714</b>   |
| FAM123B  | 0,121593  | NaN       | <b>0,121593</b>  | 1842 | NaN  | <b>1842</b>   |
| PIGT     | -0,422262 | 0,665448  | <b>0,121593</b>  | 1807 | 2091 | <b>1949</b>   |
| POMP     | -0,60171  | 0,844918  | <b>0,121604</b>  | 1796 | 1848 | <b>1822</b>   |
| MED22    | 0,153854  | 0,089423  | <b>0,1216385</b> | 1212 | 1010 | <b>1111</b>   |
| C8orf31  | -0,247153 | 0,490462  | <b>0,1216545</b> | 1141 | 1606 | <b>1373,5</b> |
| RLIM     | -0,663793 | 0,907968  | <b>0,1220875</b> | 2320 | 3049 | <b>2684,5</b> |
| CCNJL    | 0,025703  | 0,218527  | <b>0,122115</b>  | 1718 | 1782 | <b>1750</b>   |
| SLC43A3  | 0,122138  | NaN       | <b>0,122138</b>  | 1667 | NaN  | <b>1667</b>   |

|          |           |           |                  |      |      |               |
|----------|-----------|-----------|------------------|------|------|---------------|
| CASKIN1  | 0,122794  | 0,122241  | <b>0,1225175</b> | 1505 | 1668 | <b>1586,5</b> |
| PUF60    | 0,122523  | NaN       | <b>0,122523</b>  | 1115 | NaN  | <b>1115</b>   |
| LGR4     | 0,122587  | NaN       | <b>0,122587</b>  | 1664 | NaN  | <b>1664</b>   |
| TMBIM4   | 0,122656  | NaN       | <b>0,122656</b>  | 919  | NaN  | <b>919</b>    |
| ITLN1    | 0,479962  | -0,234399 | <b>0,1227815</b> | 1840 | 2036 | <b>1938</b>   |
| TTC36    | -0,534625 | 0,780646  | <b>0,1230105</b> | 1450 | 1391 | <b>1420,5</b> |
| ATP5B    | 0,325874  | -0,079644 | <b>0,123115</b>  | 1622 | 2211 | <b>1916,5</b> |
| A2M      | -0,132822 | 0,379136  | <b>0,123157</b>  | 1955 | 2100 | <b>2027,5</b> |
| SLC46A3  | -0,179226 | 0,426834  | <b>0,123804</b>  | 1676 | 2106 | <b>1891</b>   |
| HEATR1   | 0,483382  | -0,235467 | <b>0,1239575</b> | 1483 | 1449 | <b>1466</b>   |
| C1orf124 | 0,124224  | NaN       | <b>0,124224</b>  | 1760 | NaN  | <b>1760</b>   |
| CLPP     | -0,201858 | 0,45055   | <b>0,124346</b>  | 1344 | 1748 | <b>1546</b>   |
| WDR93    | -0,360706 | 0,609809  | <b>0,1245515</b> | 1773 | 2279 | <b>2026</b>   |
| CDKN2C   | -0,758922 | 1,008296  | <b>0,124687</b>  | 2319 | 1891 | <b>2105</b>   |
| DNAAF2   | 0,124691  | NaN       | <b>0,124691</b>  | 1926 | NaN  | <b>1926</b>   |
| KPTN     | -0,784176 | 1,033728  | <b>0,124776</b>  | 1897 | 1648 | <b>1772,5</b> |
| DHTKD1   | 0,100608  | 0,148971  | <b>0,1247895</b> | 1518 | 2970 | <b>2244</b>   |
| UBE2D3   | -0,025353 | 0,275068  | <b>0,1248575</b> | 1430 | 1985 | <b>1707,5</b> |
| PNMA1    | 0,760506  | -0,510522 | <b>0,124992</b>  | 2097 | 2277 | <b>2187</b>   |
| C1orf182 | 0,058867  | 0,191344  | <b>0,1251055</b> | 1660 | 2256 | <b>1958</b>   |
| DCUN1D4  | 0,925082  | -0,67438  | <b>0,125351</b>  | 1941 | 2932 | <b>2436,5</b> |
| PLEKHG2  | 0,336034  | -0,085251 | <b>0,1253915</b> | 1659 | 2091 | <b>1875</b>   |
| MYEOV2   | -0,183182 | 0,433982  | <b>0,1254</b>    | 1840 | 1819 | <b>1829,5</b> |
| APPBP2   | 0,125789  | NaN       | <b>0,125789</b>  | 1443 | NaN  | <b>1443</b>   |
| EIF3F    | 0,074297  | 0,177757  | <b>0,126027</b>  | 1584 | 2138 | <b>1861</b>   |
| S100A16  | 0,12609   | NaN       | <b>0,12609</b>   | 1387 | NaN  | <b>1387</b>   |
| NFKBIL1  | 0,458645  | -0,20641  | <b>0,1261175</b> | 1505 | 2582 | <b>2043,5</b> |
| GNAS     | 0,020122  | 0,232241  | <b>0,1261815</b> | 1893 | 2757 | <b>2325</b>   |
| ZNF35    | NaN       | 0,126425  | <b>0,126425</b>  | NaN  | 2823 | <b>2823</b>   |
| TRUB2    | 0,126517  | NaN       | <b>0,126517</b>  | 1479 | NaN  | <b>1479</b>   |
| ENSA     | 0,040514  | 0,212656  | <b>0,126585</b>  | 1673 | 2080 | <b>1876,5</b> |
| EML5     | -0,260458 | 0,514395  | <b>0,1269685</b> | 1930 | 2189 | <b>2059,5</b> |
| UBAP2    | 0,127114  | NaN       | <b>0,127114</b>  | 1744 | NaN  | <b>1744</b>   |
| GNPDA1   | -0,264383 | 0,518827  | <b>0,127222</b>  | 1320 | 1244 | <b>1282</b>   |

|          |           |           |                  |      |      |               |
|----------|-----------|-----------|------------------|------|------|---------------|
| YEATS4   | -1,351814 | 1,606267  | <b>0,1272265</b> | 1598 | 2243 | <b>1920,5</b> |
| PDLIM3   | 1,342659  | -1,088162 | <b>0,1272485</b> | 1385 | 1068 | <b>1226,5</b> |
| HSPB3    | 0,240222  | 0,014402  | <b>0,127312</b>  | 2078 | 2003 | <b>2040,5</b> |
| TIGD4    | -0,149176 | 0,404456  | <b>0,12764</b>   | 2210 | 3229 | <b>2719,5</b> |
| ZFAND1   | -0,251298 | 0,506646  | <b>0,127674</b>  | 1556 | 2541 | <b>2048,5</b> |
| OR2H1    | -0,57289  | 0,828688  | <b>0,127899</b>  | 1332 | 1864 | <b>1598</b>   |
| FAM109A  | 0,752039  | -0,496052 | <b>0,1279935</b> | 1595 | 2188 | <b>1891,5</b> |
| PTPRU    | 0,439644  | -0,183537 | <b>0,1280535</b> | 1906 | 2276 | <b>2091</b>   |
| SHISA3   | 0,128217  | NaN       | <b>0,128217</b>  | 1634 | NaN  | <b>1634</b>   |
| UBA5     | 0,458195  | -0,201609 | <b>0,128293</b>  | 1555 | 2445 | <b>2000</b>   |
| PIH1D1   | 0,128472  | NaN       | <b>0,128472</b>  | 1723 | NaN  | <b>1723</b>   |
| DNAH6    | 0,007905  | 0,249102  | <b>0,1285035</b> | 1707 | 2245 | <b>1976</b>   |
| ANO2     | 1,464732  | -1,207717 | <b>0,1285075</b> | 1874 | 2016 | <b>1945</b>   |
| PRRT3    | -0,002694 | 0,260023  | <b>0,1286645</b> | 1462 | 1502 | <b>1482</b>   |
| RNF165   | -0,287236 | 0,544583  | <b>0,1286735</b> | 1148 | 2108 | <b>1628</b>   |
| SLC2A4   | NaN       | 0,128714  | <b>0,128714</b>  | NaN  | 2100 | <b>2100</b>   |
| VPS41    | 0,149375  | 0,108252  | <b>0,1288135</b> | 1658 | 2542 | <b>2100</b>   |
| AP4M1    | 0,655465  | -0,396832 | <b>0,1293165</b> | 1845 | 2218 | <b>2031,5</b> |
| GPIHBP1  | 0,129395  | NaN       | <b>0,129395</b>  | 871  | NaN  | <b>871</b>    |
| SIGLEC6  | 0,754094  | -0,494933 | <b>0,1295805</b> | 1019 | 1317 | <b>1168</b>   |
| SIRT6    | 0,167751  | 0,093054  | <b>0,1304025</b> | 1298 | 1637 | <b>1467,5</b> |
| O1-déc   | 0,208062  | 0,052818  | <b>0,13044</b>   | 1495 | 1609 | <b>1552</b>   |
| FGF20    | 0,071128  | 0,189888  | <b>0,130508</b>  | 1287 | 1801 | <b>1544</b>   |
| ZNF804A  | 0,113525  | 0,147497  | <b>0,130511</b>  | 1330 | 1722 | <b>1526</b>   |
| TIMP3    | -0,037671 | 0,298938  | <b>0,1306335</b> | 1438 | 2080 | <b>1759</b>   |
| ABHD3    | 0,620596  | -0,359173 | <b>0,1307115</b> | 1995 | 2379 | <b>2187</b>   |
| HLA-DPA1 | -0,052564 | 0,314894  | <b>0,131165</b>  | 1973 | 2024 | <b>1998,5</b> |
| KLHDC8B  | 0,131349  | NaN       | <b>0,131349</b>  | 1744 | NaN  | <b>1744</b>   |
| PKP4     | 0,131424  | NaN       | <b>0,131424</b>  | 1461 | NaN  | <b>1461</b>   |
| CXorf38  | 0,254702  | 0,00857   | <b>0,131636</b>  | 1863 | 3152 | <b>2507,5</b> |
| SRSF6    | 0,347663  | -0,084388 | <b>0,1316375</b> | 1393 | 2099 | <b>1746</b>   |
| NHLH1    | 0,447991  | -0,184623 | <b>0,131684</b>  | 2042 | 2168 | <b>2105</b>   |
| LARP7    | -0,433502 | 0,696912  | <b>0,131705</b>  | 1810 | 2690 | <b>2250</b>   |
| ZBP1     | 0,170103  | 0,093672  | <b>0,1318875</b> | 2350 | 2176 | <b>2263</b>   |

|          |           |           |                  |      |      |               |
|----------|-----------|-----------|------------------|------|------|---------------|
| RCVRN    | 0,131999  | NaN       | <b>0,131999</b>  | 1305 | NaN  | <b>1305</b>   |
| ZNF623   | 0,716675  | -0,452667 | <b>0,132004</b>  | 1806 | 2094 | <b>1950</b>   |
| CHEK1    | -0,80845  | 1,07371   | <b>0,13263</b>   | 734  | 1564 | <b>1149</b>   |
| C1orf192 | 0,502638  | -0,237179 | <b>0,1327295</b> | 1395 | 2420 | <b>1907,5</b> |
| ACER1    | 0,862484  | -0,596821 | <b>0,1328315</b> | 1886 | 2609 | <b>2247,5</b> |
| CYP2A13  | 0,236693  | 0,029223  | <b>0,132958</b>  | 1329 | 2355 | <b>1842</b>   |
| ART4     | 0,085952  | 0,180318  | <b>0,133135</b>  | 1575 | 1990 | <b>1782,5</b> |
| FSIP2    | 0,133168  | NaN       | <b>0,133168</b>  | 1872 | NaN  | <b>1872</b>   |
| SLC13A2  | 0,212043  | 0,054349  | <b>0,133196</b>  | 1906 | 1970 | <b>1938</b>   |
| TMEM48   | 0,133437  | NaN       | <b>0,133437</b>  | 1851 | NaN  | <b>1851</b>   |
| RIPK4    | 0,436169  | -0,169102 | <b>0,1335335</b> | 1775 | 1849 | <b>1812</b>   |
| C11orf84 | -0,190645 | 0,457833  | <b>0,133594</b>  | 1947 | 2207 | <b>2077</b>   |
| MYOZ3    | 1,627378  | -1,358659 | <b>0,1343595</b> | 1106 | 1085 | <b>1095,5</b> |
| YBEY     | 0,099848  | 0,168966  | <b>0,134407</b>  | 1769 | 2188 | <b>1978,5</b> |
| ZFP37    | 0,985027  | -0,716145 | <b>0,134441</b>  | 1032 | 2301 | <b>1666,5</b> |
| FCRL6    | 0,134483  | NaN       | <b>0,134483</b>  | 1645 | NaN  | <b>1645</b>   |
| MMP15    | 1,150501  | -0,881374 | <b>0,1345635</b> | 1583 | 1565 | <b>1574</b>   |
| BCAN     | 0,13464   | NaN       | <b>0,13464</b>   | 1502 | NaN  | <b>1502</b>   |
| ALS2     | -0,205269 | 0,474776  | <b>0,1347535</b> | 1831 | 2216 | <b>2023,5</b> |
| CPEB4    | -0,245168 | 0,515373  | <b>0,1351025</b> | 1648 | 1976 | <b>1812</b>   |
| TRIP4    | 0,292159  | -0,021694 | <b>0,1352325</b> | 1844 | 2028 | <b>1936</b>   |
| C12orf71 | 0,135309  | NaN       | <b>0,135309</b>  | 1948 | NaN  | <b>1948</b>   |
| MIXL1    | 0,431947  | -0,160958 | <b>0,1354945</b> | 1556 | 1612 | <b>1584</b>   |
| TASP1    | -0,619974 | 0,890965  | <b>0,1354955</b> | 1741 | 1953 | <b>1847</b>   |
| RNF222   | 0,123079  | 0,147917  | <b>0,135498</b>  | 2166 | 2562 | <b>2364</b>   |
| GNG2     | -0,045689 | 0,316784  | <b>0,1355475</b> | 1629 | 2749 | <b>2189</b>   |
| SENP6    | 0,399524  | -0,128358 | <b>0,135583</b>  | 1389 | 2093 | <b>1741</b>   |
| NR2F1    | 0,820952  | -0,549136 | <b>0,135908</b>  | 1417 | 2342 | <b>1879,5</b> |
| ZNF454   | 0,136015  | NaN       | <b>0,136015</b>  | 1115 | NaN  | <b>1115</b>   |
| MAPK7    | 1,030373  | -0,758093 | <b>0,13614</b>   | 1452 | 1936 | <b>1694</b>   |
| IFNGR2   | -0,643024 | 0,915402  | <b>0,136189</b>  | 2025 | 2900 | <b>2462,5</b> |
| SNAI3    | 0,376605  | -0,10419  | <b>0,1362075</b> | 1361 | 1891 | <b>1626</b>   |
| OR10Z1   | -0,283244 | 0,555738  | <b>0,136247</b>  | 1753 | 2066 | <b>1909,5</b> |
| RIOK3    | 0,32548   | -0,05286  | <b>0,13631</b>   | 2095 | 2255 | <b>2175</b>   |



|          |           |           |                  |      |      |               |
|----------|-----------|-----------|------------------|------|------|---------------|
| FOXJ3    | 0,376414  | -0,103535 | <b>0,1364395</b> | 1645 | 2719 | <b>2182</b>   |
| CALR3    | 0,319045  | -0,046008 | <b>0,1365185</b> | 1514 | 1520 | <b>1517</b>   |
| SERAC1   | 0,445019  | -0,171447 | <b>0,136786</b>  | 1610 | 1833 | <b>1721,5</b> |
| MCAT     | -0,097434 | 0,371742  | <b>0,137154</b>  | 1274 | 1798 | <b>1536</b>   |
| CARKD    | 0,706944  | -0,432168 | <b>0,137388</b>  | 1751 | 1784 | <b>1767,5</b> |
| CXorf22  | 1,122998  | -0,84803  | <b>0,137484</b>  | 1854 | 2293 | <b>2073,5</b> |
| CYP46A1  | 1,293792  | -1,018529 | <b>0,1376315</b> | 1592 | 1974 | <b>1783</b>   |
| RNF26    | 0,201257  | 0,074332  | <b>0,1377945</b> | 1325 | 1842 | <b>1583,5</b> |
| PAIP2    | 0,544286  | -0,268693 | <b>0,1377965</b> | 913  | 884  | <b>898,5</b>  |
| NUDT16   | -0,118502 | 0,394442  | <b>0,13797</b>   | 1855 | 2608 | <b>2231,5</b> |
| COPS3    | 0,353257  | -0,076088 | <b>0,1385845</b> | 1314 | 1738 | <b>1526</b>   |
| C18orf10 | -0,227725 | 0,50496   | <b>0,1386175</b> | 1513 | 1705 | <b>1609</b>   |
| PPAP2C   | 0,068221  | 0,209101  | <b>0,138661</b>  | 607  | 1568 | <b>1087,5</b> |
| PKN3     | 0,666993  | -0,389638 | <b>0,1386775</b> | 1439 | 1609 | <b>1524</b>   |
| REEP6    | 0,463569  | -0,186206 | <b>0,1386815</b> | 1822 | 2289 | <b>2055,5</b> |
| FAM43A   | 0,494396  | -0,216536 | <b>0,13893</b>   | 1737 | 2113 | <b>1925</b>   |
| CDC25A   | -0,321305 | 0,599252  | <b>0,1389735</b> | 1113 | 1674 | <b>1393,5</b> |
| CCDC155  | 0,411074  | -0,13291  | <b>0,139082</b>  | 1824 | 2010 | <b>1917</b>   |
| PARG     | 0,260104  | 0,018211  | <b>0,1391575</b> | 1662 | 1960 | <b>1811</b>   |
| TALDO1   | -0,370165 | 0,648687  | <b>0,139261</b>  | 1386 | 1521 | <b>1453,5</b> |
| TEDDM1   | 0,190173  | 0,088351  | <b>0,139262</b>  | 1516 | 1770 | <b>1643</b>   |
| UROD     | 0,223547  | 0,055039  | <b>0,139293</b>  | 1882 | 2128 | <b>2005</b>   |
| HUNK     | -0,259051 | 0,537926  | <b>0,1394375</b> | 1505 | 2141 | <b>1823</b>   |
| ZIC3     | 0,182971  | 0,096144  | <b>0,1395575</b> | 1491 | 1858 | <b>1674,5</b> |
| GAD2     | 0,149877  | 0,129517  | <b>0,139697</b>  | 2078 | 2344 | <b>2211</b>   |
| STXBP1   | -0,157697 | 0,437504  | <b>0,1399035</b> | 1451 | 2074 | <b>1762,5</b> |
| PLEKHA8  | 0,140235  | NaN       | <b>0,140235</b>  | 1370 | NaN  | <b>1370</b>   |
| PATE3    | 0,872881  | -0,592121 | <b>0,14038</b>   | 1734 | 2145 | <b>1939,5</b> |
| THOC1    | -0,448977 | 0,729781  | <b>0,140402</b>  | 1325 | 1681 | <b>1503</b>   |
| QTRT1    | -0,3907   | 0,672103  | <b>0,1407015</b> | 1668 | 1951 | <b>1809,5</b> |
| CCNC     | -0,152991 | 0,434452  | <b>0,1407305</b> | 726  | 1236 | <b>981</b>    |
| RAD51B   | 1,326108  | -1,044446 | <b>0,140831</b>  | 955  | 1743 | <b>1349</b>   |
| ZNF844   | 0,167918  | 0,113748  | <b>0,140833</b>  | 1924 | 3013 | <b>2468,5</b> |
| APRT     | 0,284357  | -0,002356 | <b>0,1410005</b> | 1427 | 2386 | <b>1906,5</b> |

|          |           |           |                  |      |      |               |
|----------|-----------|-----------|------------------|------|------|---------------|
| CACNA2D2 | 0,909584  | -0,62749  | <b>0,141047</b>  | 1945 | 2982 | <b>2463,5</b> |
| SET      | -0,130986 | 0,413124  | <b>0,141069</b>  | 1741 | 2292 | <b>2016,5</b> |
| SLC9A10  | 0,103147  | 0,179993  | <b>0,14157</b>   | 1237 | 2036 | <b>1636,5</b> |
| NUP35    | 0,141654  | NaN       | <b>0,141654</b>  | 1183 | NaN  | <b>1183</b>   |
| PTPN18   | -0,023867 | 0,307601  | <b>0,141867</b>  | 1266 | 2008 | <b>1637</b>   |
| ZNF547   | -0,374762 | 0,658606  | <b>0,141922</b>  | 1990 | 2811 | <b>2400,5</b> |
| PPP3CC   | -0,352442 | 0,636319  | <b>0,1419385</b> | 1506 | 2451 | <b>1978,5</b> |
| APOL5    | -1,087043 | 1,370976  | <b>0,1419665</b> | 1629 | 1830 | <b>1729,5</b> |
| SPEM1    | 0,142011  | NaN       | <b>0,142011</b>  | 2122 | NaN  | <b>2122</b>   |
| CDH7     | 0,142064  | NaN       | <b>0,142064</b>  | 1523 | NaN  | <b>1523</b>   |
| SYNJ1    | 0,207063  | 0,077963  | <b>0,142513</b>  | 2032 | 2420 | <b>2226</b>   |
| SLC38A4  | 1,168295  | -0,882291 | <b>0,143002</b>  | 1580 | 2031 | <b>1805,5</b> |
| ARRDC4   | 0,453726  | -0,167381 | <b>0,1431725</b> | 1534 | 1798 | <b>1666</b>   |
| CDK19    | -0,220001 | 0,506554  | <b>0,1432765</b> | 1813 | 2279 | <b>2046</b>   |
| AKT3     | 0,115206  | 0,171592  | <b>0,143399</b>  | 2139 | 2171 | <b>2155</b>   |
| SNX2     | -0,280771 | 0,568194  | <b>0,1437115</b> | 1764 | 2305 | <b>2034,5</b> |
| PRX      | 0,204065  | 0,084091  | <b>0,144078</b>  | 1958 | 2501 | <b>2229,5</b> |
| ZNF804B  | 0,144111  | NaN       | <b>0,144111</b>  | 1494 | NaN  | <b>1494</b>   |
| PHACTR4  | 0,144187  | NaN       | <b>0,144187</b>  | 2022 | NaN  | <b>2022</b>   |
| MRPL19   | 0,636309  | -0,34731  | <b>0,1444995</b> | 1395 | 1850 | <b>1622,5</b> |
| UBXN1    | -0,639137 | 0,928215  | <b>0,144539</b>  | 981  | 1349 | <b>1165</b>   |
| KLB      | -0,550443 | 0,839938  | <b>0,1447475</b> | 1721 | 1907 | <b>1814</b>   |
| QRICH2   | 0,144785  | NaN       | <b>0,144785</b>  | 1314 | NaN  | <b>1314</b>   |
| CEL      | 0,048808  | 0,241146  | <b>0,144977</b>  | 1047 | 1457 | <b>1252</b>   |
| PDE5A    | -0,142573 | 0,433591  | <b>0,145509</b>  | 1702 | 1982 | <b>1842</b>   |
| GRIN2A   | 0,528154  | -0,237083 | <b>0,1455355</b> | 2388 | 2627 | <b>2507,5</b> |
| FARSB    | 0,319936  | -0,028778 | <b>0,145579</b>  | 1787 | 2399 | <b>2093</b>   |
| APOBEC4  | 0,145888  | NaN       | <b>0,145888</b>  | 1606 | NaN  | <b>1606</b>   |
| GCET2    | 0,345897  | -0,05343  | <b>0,1462335</b> | 1509 | 2740 | <b>2124,5</b> |
| FCGBP    | 0,352592  | -0,059703 | <b>0,1464445</b> | 1753 | 1900 | <b>1826,5</b> |
| NR1H3    | -0,37989  | 0,672858  | <b>0,146484</b>  | 1578 | 2164 | <b>1871</b>   |
| TMEM91   | 1,290341  | -0,997208 | <b>0,1465665</b> | 1585 | 2158 | <b>1871,5</b> |
| TMEM163  | 0,108157  | 0,185035  | <b>0,146596</b>  | 1617 | 2096 | <b>1856,5</b> |
| IDS      | -0,013066 | 0,30639   | <b>0,146662</b>  | 1796 | 2221 | <b>2008,5</b> |

|           |           |           |                  |      |      |               |
|-----------|-----------|-----------|------------------|------|------|---------------|
| C2orf49   | 0,221553  | 0,071946  | <b>0,1467495</b> | 1805 | 2838 | <b>2321,5</b> |
| OR4C6     | 0,314129  | -0,020118 | <b>0,1470055</b> | 1077 | 1692 | <b>1384,5</b> |
| AGXT2     | 0,352708  | -0,058402 | <b>0,147153</b>  | 1252 | 1481 | <b>1366,5</b> |
| MYEOV     | 0,132298  | 0,162108  | <b>0,147203</b>  | 1621 | 2004 | <b>1812,5</b> |
| CHRNA5    | 0,431553  | -0,136982 | <b>0,1472855</b> | 1131 | 1817 | <b>1474</b>   |
| GLIS3     | 0,147438  | NaN       | <b>0,147438</b>  | 1742 | NaN  | <b>1742</b>   |
| JTB       | 0,508855  | -0,21387  | <b>0,1474925</b> | 1177 | 1221 | <b>1199</b>   |
| LIM2      | 0,426639  | -0,131237 | <b>0,147701</b>  | 1637 | 2361 | <b>1999</b>   |
| KL        | 0,189055  | 0,106791  | <b>0,147923</b>  | 1348 | 1472 | <b>1410</b>   |
| FLT4      | -0,959475 | 1,255477  | <b>0,148001</b>  | 1897 | 1652 | <b>1774,5</b> |
| DACT2     | 0,321092  | -0,02504  | <b>0,148026</b>  | 1384 | 1615 | <b>1499,5</b> |
| NR1I3     | -0,172036 | 0,468182  | <b>0,148073</b>  | 1570 | 2469 | <b>2019,5</b> |
| BRMS1     | 0,693875  | -0,397605 | <b>0,148135</b>  | 1664 | 2318 | <b>1991</b>   |
| ANO10     | 0,291099  | 0,005804  | <b>0,1484515</b> | 1427 | 1662 | <b>1544,5</b> |
| MRPL23    | -0,082678 | 0,379845  | <b>0,1485835</b> | 1316 | 2181 | <b>1748,5</b> |
| ABLIM1    | 0,078781  | 0,218423  | <b>0,148602</b>  | 1671 | 1966 | <b>1818,5</b> |
| PLOD1     | 0,723008  | -0,425084 | <b>0,148962</b>  | 1680 | 1992 | <b>1836</b>   |
| ADAMTS3   | -0,479235 | 0,777194  | <b>0,1489795</b> | 1891 | 2398 | <b>2144,5</b> |
| ERGIC2    | -0,106298 | 0,404757  | <b>0,1492295</b> | 1817 | 2180 | <b>1998,5</b> |
| ARHGAP9   | 0,843348  | -0,544667 | <b>0,1493405</b> | 1561 | 2423 | <b>1992</b>   |
| KLF10     | 1,263455  | -0,964623 | <b>0,149416</b>  | 1754 | 1776 | <b>1765</b>   |
| PHF20L1   | 0,652713  | -0,353658 | <b>0,1495275</b> | 2084 | 2803 | <b>2443,5</b> |
| C22orf31  | -0,130165 | 0,429666  | <b>0,1497505</b> | 1851 | 2764 | <b>2307,5</b> |
| COA5      | 0,14983   | NaN       | <b>0,14983</b>   | 1267 | NaN  | <b>1267</b>   |
| ARSH      | 0,24199   | 0,057704  | <b>0,149847</b>  | 1732 | 2176 | <b>1954</b>   |
| OR52B2    | 0,279289  | 0,02044   | <b>0,1498645</b> | 1352 | 1698 | <b>1525</b>   |
| OR4K13    | -0,487322 | 0,787225  | <b>0,1499515</b> | 1469 | 1891 | <b>1680</b>   |
| C10orf140 | -0,59827  | 0,898324  | <b>0,150027</b>  | 1823 | 1862 | <b>1842,5</b> |
| MMADHC    | 0,586419  | -0,285384 | <b>0,1505175</b> | 1434 | 2178 | <b>1806</b>   |
| TRIM45    | -0,257342 | 0,55842   | <b>0,150539</b>  | 1690 | 2240 | <b>1965</b>   |
| RD3       | -0,275412 | 0,576582  | <b>0,150585</b>  | 1432 | 1769 | <b>1600,5</b> |
| LNPEP     | -0,524401 | 0,826457  | <b>0,151028</b>  | 1783 | 2444 | <b>2113,5</b> |
| NOL11     | 0,672033  | -0,369879 | <b>0,151077</b>  | 1348 | 1890 | <b>1619</b>   |
| OR10J1    | 0,699399  | -0,395832 | <b>0,1517835</b> | 1947 | 2954 | <b>2450,5</b> |

|          |           |           |                  |      |      |               |
|----------|-----------|-----------|------------------|------|------|---------------|
| ZC3H12B  | 0,151838  | NaN       | <b>0,151838</b>  | 2082 | NaN  | <b>2082</b>   |
| PEX16    | 0,983507  | -0,679803 | <b>0,151852</b>  | 1419 | 2083 | <b>1751</b>   |
| CLEC9A   | 0,151864  | NaN       | <b>0,151864</b>  | 1987 | NaN  | <b>1987</b>   |
| CACNA1H  | 0,412767  | -0,108932 | <b>0,1519175</b> | 1044 | 2164 | <b>1604</b>   |
| KAL1     | -0,905983 | 1,209868  | <b>0,1519425</b> | 1501 | 2054 | <b>1777,5</b> |
| EPS8L3   | 1,148823  | -0,844887 | <b>0,151968</b>  | 1890 | 2357 | <b>2123,5</b> |
| ACTR5    | -0,289242 | 0,593242  | <b>0,152</b>     | 1326 | 1970 | <b>1648</b>   |
| CAPZA2   | -0,272388 | 0,577019  | <b>0,1523155</b> | 1875 | 1687 | <b>1781</b>   |
| HOXA13   | 0,430625  | -0,125437 | <b>0,152594</b>  | 1615 | 1964 | <b>1789,5</b> |
| TRAF3IP2 | -0,049034 | 0,354594  | <b>0,15278</b>   | 2121 | 2087 | <b>2104</b>   |
| LRP2     | -0,245697 | 0,552021  | <b>0,153162</b>  | 1089 | 1938 | <b>1513,5</b> |
| TRADD    | 0,403509  | -0,096586 | <b>0,1534615</b> | 1755 | 1980 | <b>1867,5</b> |
| OR1N2    | 0,514399  | -0,207296 | <b>0,1535515</b> | 1320 | 2497 | <b>1908,5</b> |
| DIAPH1   | 0,062643  | 0,244764  | <b>0,1537035</b> | 1428 | 1986 | <b>1707</b>   |
| PPRC1    | 0,153769  | NaN       | <b>0,153769</b>  | 1231 | NaN  | <b>1231</b>   |
| MTFR1    | 0,43747   | -0,129533 | <b>0,1539685</b> | 1826 | 2263 | <b>2044,5</b> |
| OR5B17   | 0,29493   | 0,013238  | <b>0,154084</b>  | 1422 | 2465 | <b>1943,5</b> |
| TBC1D21  | 0,646722  | -0,337566 | <b>0,154578</b>  | 1447 | 1811 | <b>1629</b>   |
| DSTYK    | 0,135863  | 0,173635  | <b>0,154749</b>  | 1862 | 2502 | <b>2182</b>   |
| KCNE4    | 0,959794  | -0,650163 | <b>0,1548155</b> | 1782 | 2620 | <b>2201</b>   |
| HMMR     | 2,200442  | -1,890801 | <b>0,1548205</b> | 978  | 1875 | <b>1426,5</b> |
| DCUN1D2  | 0,419298  | -0,109408 | <b>0,154945</b>  | 1965 | 2735 | <b>2350</b>   |
| EFCAB4B  | 0,155025  | NaN       | <b>0,155025</b>  | 966  | NaN  | <b>966</b>    |
| MDM1     | 0,155451  | NaN       | <b>0,155451</b>  | 1294 | NaN  | <b>1294</b>   |
| CRY2     | -0,265184 | 0,576699  | <b>0,1557575</b> | 1621 | 2127 | <b>1874</b>   |
| SNX8     | 0,155892  | NaN       | <b>0,155892</b>  | 1462 | NaN  | <b>1462</b>   |
| TWISTNB  | 0,385305  | -0,073455 | <b>0,155925</b>  | 1338 | 1746 | <b>1542</b>   |
| TBL3     | 0,215899  | 0,096298  | <b>0,1560985</b> | 1428 | 2229 | <b>1828,5</b> |
| USP33    | 0,135453  | 0,176991  | <b>0,156222</b>  | 1750 | 2630 | <b>2190</b>   |
| OPA1     | 0,867159  | -0,55444  | <b>0,1563595</b> | 1993 | 1783 | <b>1888</b>   |
| IQCF3    | -0,014383 | 0,328028  | <b>0,1568225</b> | 1714 | 1816 | <b>1765</b>   |
| CEP68    | 1,198204  | -0,88389  | <b>0,157157</b>  | 1746 | 2608 | <b>2177</b>   |
| STAT5B   | 0,00619   | 0,308968  | <b>0,157579</b>  | 1848 | 2246 | <b>2047</b>   |
| CTNNA3   | 0,567819  | -0,25216  | <b>0,1578295</b> | 2040 | 2365 | <b>2202,5</b> |

|          |           |           |                  |      |      |               |
|----------|-----------|-----------|------------------|------|------|---------------|
| LCN6     | 0,773885  | -0,457986 | <b>0,1579495</b> | 1762 | 1980 | <b>1871</b>   |
| PRPSAP2  | 0,713839  | -0,397839 | <b>0,158</b>     | 2274 | 2395 | <b>2334,5</b> |
| RND1     | -0,08164  | 0,397935  | <b>0,1581475</b> | 1482 | 2059 | <b>1770,5</b> |
| FAM174B  | 0,870453  | -0,554061 | <b>0,158196</b>  | 1865 | 2267 | <b>2066</b>   |
| TOPBP1   | 0,47514   | -0,158271 | <b>0,1584345</b> | 1549 | 2571 | <b>2060</b>   |
| LY6G5C   | 1,021773  | -0,704542 | <b>0,1586155</b> | 1572 | 1412 | <b>1492</b>   |
| SLC25A6  | -0,139255 | 0,456728  | <b>0,1587365</b> | 1662 | 1566 | <b>1614</b>   |
| VDAC2    | -0,419322 | 0,737508  | <b>0,159093</b>  | 1562 | 2169 | <b>1865,5</b> |
| NAP1L3   | 0,614826  | -0,296635 | <b>0,1590955</b> | 1314 | 1642 | <b>1478</b>   |
| ARL5A    | 0,42241   | -0,104103 | <b>0,1591535</b> | 1528 | 1552 | <b>1540</b>   |
| DDX27    | 0,156511  | 0,161834  | <b>0,1591725</b> | 1471 | 2023 | <b>1747</b>   |
| CDH20    | -0,067946 | 0,386758  | <b>0,159406</b>  | 1293 | 1981 | <b>1637</b>   |
| STRN     | 0,39466   | -0,075327 | <b>0,1596665</b> | 2211 | 2254 | <b>2232,5</b> |
| TSPAN2   | 0,631304  | -0,311938 | <b>0,159683</b>  | 1950 | 2060 | <b>2005</b>   |
| SUCLG2   | -0,216034 | 0,53549   | <b>0,159728</b>  | 1448 | 1698 | <b>1573</b>   |
| COPS6    | 0,07972   | 0,239945  | <b>0,1598325</b> | 1218 | 1241 | <b>1229,5</b> |
| SHISA6   | 0,159921  | NaN       | <b>0,159921</b>  | 1318 | NaN  | <b>1318</b>   |
| DLAT     | 0,269061  | 0,051791  | <b>0,160426</b>  | 1632 | 1798 | <b>1715</b>   |
| 09-mars  | -0,343499 | 0,665078  | <b>0,1607895</b> | 1738 | 2571 | <b>2154,5</b> |
| ABCG8    | 0,397728  | -0,075792 | <b>0,160968</b>  | 1014 | 1530 | <b>1272</b>   |
| PRIM1    | 0,89478   | -0,572751 | <b>0,1610145</b> | 1629 | 2417 | <b>2023</b>   |
| TECPR1   | 0,161049  | NaN       | <b>0,161049</b>  | 1289 | NaN  | <b>1289</b>   |
| TDRD10   | 0,096592  | 0,22576   | <b>0,161176</b>  | 1728 | 2369 | <b>2048,5</b> |
| FZD10    | 0,161231  | NaN       | <b>0,161231</b>  | 1792 | NaN  | <b>1792</b>   |
| ARMC1    | 0,161272  | NaN       | <b>0,161272</b>  | 1886 | NaN  | <b>1886</b>   |
| CYTL1    | 0,161375  | NaN       | <b>0,161375</b>  | 1588 | NaN  | <b>1588</b>   |
| CACNA2D3 | -0,15896  | 0,482278  | <b>0,161659</b>  | 2133 | 3056 | <b>2594,5</b> |
| CCT7     | -0,310189 | 0,633817  | <b>0,161814</b>  | 1809 | 1665 | <b>1737</b>   |
| EIF2C2   | 0,385275  | -0,061617 | <b>0,161829</b>  | 1767 | 2738 | <b>2252,5</b> |
| 09-sept  | -0,816727 | 1,140436  | <b>0,1618545</b> | 1468 | 1590 | <b>1529</b>   |
| STX6     | 0,377404  | -0,053339 | <b>0,1620325</b> | 1496 | 2325 | <b>1910,5</b> |
| CCDC17   | 0,610329  | -0,285631 | <b>0,162349</b>  | 1779 | 2031 | <b>1905</b>   |
| SLC39A9  | 0,700939  | -0,376139 | <b>0,1624</b>    | 1949 | 2509 | <b>2229</b>   |
| FEZ1     | 0,280788  | 0,044242  | <b>0,162515</b>  | 2170 | 1947 | <b>2058,5</b> |

|          |           |           |                  |      |      |               |
|----------|-----------|-----------|------------------|------|------|---------------|
| HOXA2    | -0,056054 | 0,381158  | <b>0,162552</b>  | 1193 | 1827 | <b>1510</b>   |
| SCLT1    | 0,162584  | NaN       | <b>0,162584</b>  | 1790 | NaN  | <b>1790</b>   |
| REXO2    | 0,146281  | 0,179225  | <b>0,162753</b>  | 1712 | 2492 | <b>2102</b>   |
| PTGIR    | -0,123703 | 0,449696  | <b>0,1629965</b> | 2317 | 1971 | <b>2144</b>   |
| ZNF518A  | -0,491357 | 0,817512  | <b>0,1630775</b> | 1479 | 1886 | <b>1682,5</b> |
| NPAS3    | -0,729635 | 1,056093  | <b>0,163229</b>  | 1798 | 2294 | <b>2046</b>   |
| LHFPL3   | -0,15428  | 0,480889  | <b>0,1633045</b> | 1475 | 1652 | <b>1563,5</b> |
| CXorf1   | 0,411727  | -0,085079 | <b>0,163324</b>  | 1885 | 1975 | <b>1930</b>   |
| PLXNA4   | 0,309871  | 0,016884  | <b>0,1633775</b> | 1664 | 2105 | <b>1884,5</b> |
| OR52H1   | 0,224757  | 0,102238  | <b>0,1634975</b> | 1601 | 2440 | <b>2020,5</b> |
| FAM48A   | -0,020215 | 0,347406  | <b>0,1635955</b> | 1017 | 1649 | <b>1333</b>   |
| SERPINC1 | 0,66135   | -0,334029 | <b>0,1636605</b> | 2015 | 2048 | <b>2031,5</b> |
| MAP9     | -0,026356 | 0,353772  | <b>0,163708</b>  | 2164 | 2670 | <b>2417</b>   |
| PLA2G12A | 0,051216  | 0,276362  | <b>0,163789</b>  | 1624 | 2287 | <b>1955,5</b> |
| CTSL3    | -0,396064 | 0,723869  | <b>0,1639025</b> | 1623 | 2705 | <b>2164</b>   |
| HEPH     | 1,38427   | -1,056188 | <b>0,164041</b>  | 960  | 2158 | <b>1559</b>   |
| SPRY1    | -0,106817 | 0,434983  | <b>0,164083</b>  | 1674 | 1643 | <b>1658,5</b> |
| TRIM68   | 0,244065  | 0,084359  | <b>0,164212</b>  | 1489 | 2472 | <b>1980,5</b> |
| SLC22A8  | 0,027894  | 0,300731  | <b>0,1643125</b> | 1362 | 1734 | <b>1548</b>   |
| OR52N4   | 0,334627  | -0,00592  | <b>0,1643535</b> | 2040 | 2472 | <b>2256</b>   |
| VWA3B    | 0,144245  | 0,185178  | <b>0,1647115</b> | 1531 | 2741 | <b>2136</b>   |
| VPS25    | 0,164839  | NaN       | <b>0,164839</b>  | 1531 | NaN  | <b>1531</b>   |
| MARK2    | -0,250328 | 0,580403  | <b>0,1650375</b> | 1354 | 1777 | <b>1565,5</b> |
| NINJ2    | 0,165234  | NaN       | <b>0,165234</b>  | 1367 | NaN  | <b>1367</b>   |
| IDUA     | 0,678186  | -0,347531 | <b>0,1653275</b> | 1627 | 2602 | <b>2114,5</b> |
| IQCD     | 0,165678  | NaN       | <b>0,165678</b>  | 1431 | NaN  | <b>1431</b>   |
| EGLN1    | 0,278744  | 0,052686  | <b>0,165715</b>  | 1946 | 2097 | <b>2021,5</b> |
| EIF3A    | 0,532718  | -0,201223 | <b>0,1657475</b> | 1911 | 2052 | <b>1981,5</b> |
| C11orf94 | 0,165902  | NaN       | <b>0,165902</b>  | 1880 | NaN  | <b>1880</b>   |
| DDB1     | -0,020544 | 0,352499  | <b>0,1659775</b> | 1370 | 1389 | <b>1379,5</b> |
| WFDC10A  | 0,190794  | 0,14127   | <b>0,166032</b>  | 1679 | 2071 | <b>1875</b>   |
| PCDHA13  | 0,308251  | 0,02415   | <b>0,1662005</b> | 1188 | 2131 | <b>1659,5</b> |
| CCDC121  | 0,66802   | -0,33553  | <b>0,166245</b>  | 1503 | 2089 | <b>1796</b>   |
| CD248    | 0,166407  | NaN       | <b>0,166407</b>  | 1508 | NaN  | <b>1508</b>   |

|          |           |           |                  |      |      |               |
|----------|-----------|-----------|------------------|------|------|---------------|
| C1orf183 | 0,308222  | 0,024592  | <b>0,166407</b>  | 1851 | 1942 | <b>1896,5</b> |
| MAPKAP1  | 0,571724  | -0,238276 | <b>0,166724</b>  | 1596 | 2405 | <b>2000,5</b> |
| PUS3     | 0,418588  | -0,08507  | <b>0,166759</b>  | 2061 | 3044 | <b>2552,5</b> |
| THAP8    | -0,270635 | 0,604358  | <b>0,1668615</b> | 1459 | 1437 | <b>1448</b>   |
| SPANXN4  | -0,764859 | 1,098635  | <b>0,166888</b>  | 1625 | 1892 | <b>1758,5</b> |
| IQCK     | 0,185906  | 0,148027  | <b>0,1669665</b> | 1927 | 2387 | <b>2157</b>   |
| SPDYC    | -0,109024 | 0,443024  | <b>0,167</b>     | 1276 | 2067 | <b>1671,5</b> |
| CCDC159  | -0,383905 | 0,718126  | <b>0,1671105</b> | 1613 | 2605 | <b>2109</b>   |
| HSD17B13 | 0,116881  | 0,217558  | <b>0,1672195</b> | 1854 | 1896 | <b>1875</b>   |
| C9orf80  | 0,167278  | NaN       | <b>0,167278</b>  | 2325 | NaN  | <b>2325</b>   |
| NVL      | 0,167421  | NaN       | <b>0,167421</b>  | 1666 | NaN  | <b>1666</b>   |
| PHF8     | -0,002696 | 0,337966  | <b>0,167635</b>  | 1707 | 2272 | <b>1989,5</b> |
| NUFIP1   | 0,990582  | -0,655288 | <b>0,167647</b>  | 1733 | 2320 | <b>2026,5</b> |
| ADK      | -0,59366  | 0,929485  | <b>0,1679125</b> | 1530 | 1457 | <b>1493,5</b> |
| OR6C65   | 0,965825  | -0,629323 | <b>0,168251</b>  | 1792 | 2345 | <b>2068,5</b> |
| NSUN7    | -0,355736 | 0,692353  | <b>0,1683085</b> | 1579 | 1889 | <b>1734</b>   |
| SLC45A1  | 0,168479  | NaN       | <b>0,168479</b>  | 1279 | NaN  | <b>1279</b>   |
| TTC35    | 0,16856   | NaN       | <b>0,16856</b>   | 1413 | NaN  | <b>1413</b>   |
| MTMR14   | 0,035476  | 0,302007  | <b>0,1687415</b> | 1281 | 2173 | <b>1727</b>   |
| ZNF550   | -0,028923 | 0,36645   | <b>0,1687635</b> | 1498 | 1971 | <b>1734,5</b> |
| OR4A5    | -0,689547 | 1,02741   | <b>0,1689315</b> | 1843 | 1947 | <b>1895</b>   |
| CD5L     | -0,13203  | 0,469998  | <b>0,168984</b>  | 1519 | 2312 | <b>1915,5</b> |
| KIN      | -0,504881 | 0,843175  | <b>0,169147</b>  | 1884 | 1901 | <b>1892,5</b> |
| GP5      | -0,649587 | 0,988025  | <b>0,169219</b>  | 1675 | 1696 | <b>1685,5</b> |
| KIAA1432 | -0,153771 | 0,492286  | <b>0,1692575</b> | 1701 | 2120 | <b>1910,5</b> |
| LRIG3    | 0,393315  | -0,05428  | <b>0,1695175</b> | 1876 | 1831 | <b>1853,5</b> |
| RPAIN    | 0,472999  | -0,133781 | <b>0,169609</b>  | 1123 | 1457 | <b>1290</b>   |
| NXN      | 0,831019  | -0,491224 | <b>0,1698975</b> | 1736 | 2541 | <b>2138,5</b> |
| TTC23L   | -0,99694  | 1,336925  | <b>0,1699925</b> | 1563 | 2277 | <b>1920</b>   |
| TGS1     | NaN       | 0,170287  | <b>0,170287</b>  | NaN  | 2013 | <b>2013</b>   |
| SHH      | -0,779643 | 1,120698  | <b>0,1705275</b> | 1217 | 2094 | <b>1655,5</b> |
| LRRC8A   | 1,085758  | -0,744185 | <b>0,1707865</b> | 1538 | 1686 | <b>1612</b>   |
| NIT2     | -0,158084 | 0,499661  | <b>0,1707885</b> | 1401 | 1796 | <b>1598,5</b> |
| WWP2     | 0,997123  | -0,655334 | <b>0,1708945</b> | 1921 | 3229 | <b>2575</b>   |

|         |           |           |                  |      |      |               |
|---------|-----------|-----------|------------------|------|------|---------------|
| CNKSRI  | 0,340488  | 0,001447  | <b>0,1709675</b> | 1280 | 1599 | <b>1439,5</b> |
| HS6ST1  | -0,009382 | 0,351516  | <b>0,171067</b>  | 1116 | 2261 | <b>1688,5</b> |
| UGGT1   | -0,228984 | 0,571123  | <b>0,1710695</b> | 1748 | 2697 | <b>2222,5</b> |
| OSBPL10 | 0,015876  | 0,326401  | <b>0,1711385</b> | 1051 | 1660 | <b>1355,5</b> |
| NTHL1   | 0,309932  | 0,032413  | <b>0,1711725</b> | 1272 | 2234 | <b>1753</b>   |
| EPX     | 0,529202  | -0,185467 | <b>0,1718675</b> | 1748 | 1991 | <b>1869,5</b> |
| CORO2B  | 0,787984  | -0,444058 | <b>0,171963</b>  | 1563 | 2115 | <b>1839</b>   |
| PAK1    | -0,002127 | 0,346126  | <b>0,1719995</b> | 1317 | 2085 | <b>1701</b>   |
| CCDC30  | 0,4701    | -0,125826 | <b>0,172137</b>  | 1983 | 2132 | <b>2057,5</b> |
| NEB     | -0,383754 | 0,728501  | <b>0,1723735</b> | 1542 | 2136 | <b>1839</b>   |
| GABPB1  | -0,019035 | 0,363966  | <b>0,1724655</b> | 1880 | 2149 | <b>2014,5</b> |
| TMEM85  | 0,172738  | NaN       | <b>0,172738</b>  | 2029 | NaN  | <b>2029</b>   |
| VIT     | 0,45077   | -0,105122 | <b>0,172824</b>  | 1927 | 1726 | <b>1826,5</b> |
| TOR3A   | 0,304319  | 0,04169   | <b>0,1730045</b> | 1297 | 1726 | <b>1511,5</b> |
| SOX13   | 1,247828  | -0,901684 | <b>0,173072</b>  | 1585 | 1710 | <b>1647,5</b> |
| RBM33   | 0,83424   | -0,487954 | <b>0,173143</b>  | 2039 | 2194 | <b>2116,5</b> |
| SLC4A5  | 1,153996  | -0,807044 | <b>0,173476</b>  | 1283 | 2012 | <b>1647,5</b> |
| YTHDC2  | -0,308407 | 0,655388  | <b>0,1734905</b> | 1583 | 2834 | <b>2208,5</b> |
| SLC23A1 | NaN       | 0,173712  | <b>0,173712</b>  | NaN  | 2106 | <b>2106</b>   |
| PDCL2   | -0,556838 | 0,904334  | <b>0,173748</b>  | 1415 | 2352 | <b>1883,5</b> |
| METTL17 | 0,174106  | NaN       | <b>0,174106</b>  | 1801 | NaN  | <b>1801</b>   |
| C2orf55 | 0,174123  | NaN       | <b>0,174123</b>  | 1685 | NaN  | <b>1685</b>   |
| DCTPP1  | 0,394655  | -0,046113 | <b>0,174271</b>  | 1218 | 1769 | <b>1493,5</b> |
| ABCC2   | 0,221221  | 0,127465  | <b>0,174343</b>  | 2054 | 1899 | <b>1976,5</b> |
| BTG4    | 0,619573  | -0,270851 | <b>0,174361</b>  | 2074 | 2222 | <b>2148</b>   |
| CCDC130 | -0,200178 | 0,549627  | <b>0,1747245</b> | 1396 | 1628 | <b>1512</b>   |
| CCNB2   | 0,474558  | -0,124822 | <b>0,174868</b>  | 1423 | 1754 | <b>1588,5</b> |
| TBC1D19 | -0,801644 | 1,151509  | <b>0,1749325</b> | 1810 | 2345 | <b>2077,5</b> |
| GLS     | 0,13834   | 0,211965  | <b>0,1751525</b> | 1514 | 1846 | <b>1680</b>   |
| SEL1L   | -1,220255 | 1,571108  | <b>0,1754265</b> | 1061 | 1930 | <b>1495,5</b> |
| AP1G2   | 0,175575  | NaN       | <b>0,175575</b>  | 1694 | NaN  | <b>1694</b>   |
| MIIP    | -0,093277 | 0,444475  | <b>0,175599</b>  | 1730 | 2096 | <b>1913</b>   |
| CMTM8   | 0,908005  | -0,556746 | <b>0,1756295</b> | 1441 | 1723 | <b>1582</b>   |
| USP51   | -0,470773 | 0,822075  | <b>0,175651</b>  | 1581 | 2266 | <b>1923,5</b> |



|            |           |           |                  |      |      |               |
|------------|-----------|-----------|------------------|------|------|---------------|
| RCN3       | 0,380554  | -0,028568 | <b>0,175993</b>  | 1733 | 2176 | <b>1954,5</b> |
| ATP6AP2    | 0,529074  | -0,176962 | <b>0,176056</b>  | 1946 | 1751 | <b>1848,5</b> |
| ZFHX4      | -0,628861 | 0,981571  | <b>0,176355</b>  | 1559 | 2024 | <b>1791,5</b> |
| C19orf34   | -0,376227 | 0,729253  | <b>0,176513</b>  | 1052 | 1347 | <b>1199,5</b> |
| CCDC151    | 0,176529  | NaN       | <b>0,176529</b>  | 1698 | NaN  | <b>1698</b>   |
| WDR81      | 0,176686  | NaN       | <b>0,176686</b>  | 2036 | NaN  | <b>2036</b>   |
| BID        | 0,256908  | 0,096944  | <b>0,176926</b>  | 1842 | 2855 | <b>2348,5</b> |
| CPD        | 0,309736  | 0,044295  | <b>0,1770155</b> | 1366 | 1922 | <b>1644</b>   |
| KLF1       | 0,893701  | -0,539178 | <b>0,1772615</b> | 938  | 1229 | <b>1083,5</b> |
| KCNIP1     | -0,90788  | 1,262812  | <b>0,177466</b>  | 2230 | 3551 | <b>2890,5</b> |
| INTS9      | 0,177492  | NaN       | <b>0,177492</b>  | 1804 | NaN  | <b>1804</b>   |
| ICAM5      | 0,177663  | NaN       | <b>0,177663</b>  | 1447 | NaN  | <b>1447</b>   |
| KRTAP19-4  | -0,252236 | 0,607712  | <b>0,177738</b>  | 1001 | 2108 | <b>1554,5</b> |
| C12orf10   | 0,177955  | NaN       | <b>0,177955</b>  | 1648 | NaN  | <b>1648</b>   |
| FLJ22184   | 0,244961  | 0,110986  | <b>0,1779735</b> | 1479 | 2059 | <b>1769</b>   |
| TCEA2      | -0,127264 | 0,483424  | <b>0,17808</b>   | 1469 | 2176 | <b>1822,5</b> |
| PRPH2      | -0,923515 | 1,281176  | <b>0,1788305</b> | 1524 | 2963 | <b>2243,5</b> |
| APBB3      | 0,037449  | 0,320481  | <b>0,178965</b>  | 1397 | 2460 | <b>1928,5</b> |
| UPRT       | -0,037866 | 0,395909  | <b>0,1790215</b> | 1864 | 2263 | <b>2063,5</b> |
| OTOGL      | 0,179061  | NaN       | <b>0,179061</b>  | 2198 | NaN  | <b>2198</b>   |
| DEF8       | 0,756211  | -0,397633 | <b>0,179289</b>  | 1603 | 1724 | <b>1663,5</b> |
| ADAMDEC1   | 0,045172  | 0,31364   | <b>0,179406</b>  | 2535 | 2407 | <b>2471</b>   |
| UBE2J2     | 0,177228  | 0,182043  | <b>0,1796355</b> | 1823 | 2819 | <b>2321</b>   |
| PCYT1B     | NaN       | 0,179754  | <b>0,179754</b>  | NaN  | 3159 | <b>3159</b>   |
| FKBP6      | -0,302505 | 0,662225  | <b>0,17986</b>   | 829  | 1908 | <b>1368,5</b> |
| C1orf127   | 0,18012   | NaN       | <b>0,18012</b>   | 1943 | NaN  | <b>1943</b>   |
| PAFAH2     | -0,022577 | 0,382954  | <b>0,1801885</b> | 1795 | 1755 | <b>1775</b>   |
| ABHD4      | NaN       | 0,180433  | <b>0,180433</b>  | NaN  | 2326 | <b>2326</b>   |
| RGNEF      | 0,541335  | -0,180338 | <b>0,1804985</b> | 2151 | 3127 | <b>2639</b>   |
| ST6GALNAC2 | -0,222074 | 0,583486  | <b>0,180706</b>  | 1257 | 1509 | <b>1383</b>   |
| HARBI1     | 0,475526  | -0,113988 | <b>0,180769</b>  | 2146 | 2210 | <b>2178</b>   |
| ZNF318     | 0,071998  | 0,289736  | <b>0,180867</b>  | 1539 | 1437 | <b>1488</b>   |
| B3GALT2    | 0,281051  | 0,080972  | <b>0,1810115</b> | 1719 | 2611 | <b>2165</b>   |
| ODZ2       | 0,160696  | 0,201361  | <b>0,1810285</b> | 2018 | 1985 | <b>2001,5</b> |

|           |           |           |                  |      |      |               |
|-----------|-----------|-----------|------------------|------|------|---------------|
| CLSTN2    | 0,314608  | 0,047591  | <b>0,1810995</b> | 1366 | 1806 | <b>1586</b>   |
| GLCE      | -0,596003 | 0,959611  | <b>0,181804</b>  | 1666 | 1860 | <b>1763</b>   |
| ZNF468    | -0,451804 | 0,815749  | <b>0,1819725</b> | 1240 | 2508 | <b>1874</b>   |
| TUBA4A    | 0,415146  | -0,051131 | <b>0,1820075</b> | 1848 | 2365 | <b>2106,5</b> |
| DDIT4L    | -0,466675 | 0,830747  | <b>0,182036</b>  | 1777 | 2519 | <b>2148</b>   |
| RASAL2    | 0,343493  | 0,021153  | <b>0,182323</b>  | 1210 | 1883 | <b>1546,5</b> |
| KIAA0226L | -0,303768 | 0,668645  | <b>0,1824385</b> | 2141 | 1449 | <b>1795</b>   |
| SPPL2A    | -0,149239 | 0,514591  | <b>0,182676</b>  | 2174 | 2176 | <b>2175</b>   |
| DPM3      | 0,176212  | 0,18979   | <b>0,183001</b>  | 1054 | 1340 | <b>1197</b>   |
| LDOC1     | 0,183065  | NaN       | <b>0,183065</b>  | 1662 | NaN  | <b>1662</b>   |
| ANKFN1    | 0,183207  | NaN       | <b>0,183207</b>  | 1951 | NaN  | <b>1951</b>   |
| ETNK2     | -0,21219  | 0,578671  | <b>0,1832405</b> | 1741 | 1730 | <b>1735,5</b> |
| C17orf63  | 0,399951  | -0,033448 | <b>0,1832515</b> | 1788 | 2148 | <b>1968</b>   |
| ZNF155    | 0,183564  | NaN       | <b>0,183564</b>  | 1478 | NaN  | <b>1478</b>   |
| PRKAA1    | -0,025006 | 0,392727  | <b>0,1838605</b> | 1450 | 2114 | <b>1782</b>   |
| UQCRC2    | -0,154671 | 0,522713  | <b>0,184021</b>  | 1909 | 2277 | <b>2093</b>   |
| C10orf120 | 0,184116  | NaN       | <b>0,184116</b>  | 1945 | NaN  | <b>1945</b>   |
| LZTS1     | 0,361828  | 0,006472  | <b>0,18415</b>   | 874  | 1331 | <b>1102,5</b> |
| PTK6      | -0,598006 | 0,96664   | <b>0,184317</b>  | 1723 | 2089 | <b>1906</b>   |
| PIGO      | NaN       | 0,184371  | <b>0,184371</b>  | NaN  | 1961 | <b>1961</b>   |
| FANCB     | 0,79345   | -0,424665 | <b>0,1843925</b> | 1681 | 1699 | <b>1690</b>   |
| ZBED3     | 0,667213  | -0,297358 | <b>0,1849275</b> | 1455 | 2102 | <b>1778,5</b> |
| PRR14     | -0,035412 | 0,405558  | <b>0,185073</b>  | 1872 | 1782 | <b>1827</b>   |
| RFNG      | -0,007155 | 0,378295  | <b>0,18557</b>   | 1631 | 2669 | <b>2150</b>   |
| BAG4      | 0,323     | 0,048399  | <b>0,1856995</b> | 1159 | 2105 | <b>1632</b>   |
| ADORA3    | 0,185708  | NaN       | <b>0,185708</b>  | 911  | NaN  | <b>911</b>    |
| AIM1      | 0,121322  | 0,250161  | <b>0,1857415</b> | 2228 | 1788 | <b>2008</b>   |
| NEK1      | -0,19308  | 0,564845  | <b>0,1858825</b> | 1187 | 1547 | <b>1367</b>   |
| NAT6      | -0,037156 | 0,408938  | <b>0,185891</b>  | 1285 | 1654 | <b>1469,5</b> |
| OR4D6     | 0,185952  | NaN       | <b>0,185952</b>  | 1378 | NaN  | <b>1378</b>   |
| C6orf223  | 0,186014  | NaN       | <b>0,186014</b>  | 1376 | NaN  | <b>1376</b>   |
| FCN3      | -0,252918 | 0,624991  | <b>0,1860365</b> | 973  | 1577 | <b>1275</b>   |
| NUP88     | -0,748423 | 1,12055   | <b>0,1860635</b> | 1438 | 1920 | <b>1679</b>   |
| MCCC2     | 1,517925  | -1,145499 | <b>0,186213</b>  | 1080 | 2445 | <b>1762,5</b> |

|          |           |           |                  |      |      |               |
|----------|-----------|-----------|------------------|------|------|---------------|
| RPL14    | 0,18622   | NaN       | <b>0,18622</b>   | 918  | NaN  | <b>918</b>    |
| ITIH3    | 0,186511  | NaN       | <b>0,186511</b>  | 1652 | NaN  | <b>1652</b>   |
| GNRH1    | -0,133373 | 0,506691  | <b>0,186659</b>  | 1733 | 1752 | <b>1742,5</b> |
| RAD17    | 1,403297  | -1,029867 | <b>0,186715</b>  | 762  | 1417 | <b>1089,5</b> |
| ACADS    | 0,099192  | 0,274342  | <b>0,186767</b>  | 1686 | 2316 | <b>2001</b>   |
| CATSPERG | -0,070733 | 0,444542  | <b>0,1869045</b> | 1120 | 1614 | <b>1367</b>   |
| AKD1     | 0,810055  | -0,436017 | <b>0,187019</b>  | 1780 | 2022 | <b>1901</b>   |
| PAWR     | 0,034775  | 0,339526  | <b>0,1871505</b> | 1803 | 2360 | <b>2081,5</b> |
| UBE2L6   | 0,833557  | -0,459035 | <b>0,187261</b>  | 1571 | 2830 | <b>2200,5</b> |
| FAM108B1 | 0,605706  | -0,230612 | <b>0,187547</b>  | 1626 | 1972 | <b>1799</b>   |
| WRB      | -0,181018 | 0,556271  | <b>0,1876265</b> | 1663 | 1440 | <b>1551,5</b> |
| RPL26L1  | 0,58693   | -0,211432 | <b>0,187749</b>  | 1635 | 2435 | <b>2035</b>   |
| WDR36    | 0,503649  | -0,128004 | <b>0,1878225</b> | 1627 | 1928 | <b>1777,5</b> |
| APOL2    | 0,557018  | -0,181305 | <b>0,1878565</b> | 1762 | 2500 | <b>2131</b>   |
| SLC22A10 | -0,759322 | 1,135155  | <b>0,1879165</b> | 1371 | 1778 | <b>1574,5</b> |
| TRIM14   | -0,002079 | 0,378025  | <b>0,187973</b>  | 1056 | 1866 | <b>1461</b>   |
| DTNB     | 0,039437  | 0,336518  | <b>0,1879775</b> | 1817 | 2288 | <b>2052,5</b> |
| ARPC5    | 0,34962   | 0,026612  | <b>0,188116</b>  | 1863 | 2360 | <b>2111,5</b> |
| POFUT2   | 0,478164  | -0,101831 | <b>0,1881665</b> | 1501 | 2933 | <b>2217</b>   |
| PCDH20   | 0,131128  | 0,245251  | <b>0,1881895</b> | 1462 | 2263 | <b>1862,5</b> |
| C1orf100 | 0,188361  | NaN       | <b>0,188361</b>  | 1337 | NaN  | <b>1337</b>   |
| ZMYND10  | 0,188369  | NaN       | <b>0,188369</b>  | 1375 | NaN  | <b>1375</b>   |
| ZIM2     | 0,188887  | NaN       | <b>0,188887</b>  | 1452 | NaN  | <b>1452</b>   |
| UBL7     | -0,536052 | 0,913869  | <b>0,1889085</b> | 1667 | 1903 | <b>1785</b>   |
| ADAMTS12 | 0,052399  | 0,325645  | <b>0,189022</b>  | 1563 | 2410 | <b>1986,5</b> |
| AAGAB    | 1,154858  | -0,776713 | <b>0,1890725</b> | 2028 | 2158 | <b>2093</b>   |
| PLP1     | 0,141183  | 0,23759   | <b>0,1893865</b> | 1805 | 2192 | <b>1998,5</b> |
| KCNH4    | -0,854592 | 1,233602  | <b>0,189505</b>  | 1505 | 1603 | <b>1554</b>   |
| MIOS     | 0,280818  | 0,098262  | <b>0,18954</b>   | 1795 | 2091 | <b>1943</b>   |
| FXVD7    | -0,27616  | 0,655666  | <b>0,189753</b>  | 1767 | 2824 | <b>2295,5</b> |
| RRP1     | 0,597615  | -0,21772  | <b>0,1899475</b> | 1140 | 1538 | <b>1339</b>   |
| NTN3     | 0,537173  | -0,156833 | <b>0,19017</b>   | 1176 | 1866 | <b>1521</b>   |
| LIMK1    | -0,109189 | 0,489801  | <b>0,190306</b>  | 1854 | 1760 | <b>1807</b>   |
| AASS     | 0,016202  | 0,364545  | <b>0,1903735</b> | 2128 | 2180 | <b>2154</b>   |

|          |           |           |                  |      |      |               |
|----------|-----------|-----------|------------------|------|------|---------------|
| NPTN     | -0,000038 | 0,382267  | <b>0,1911145</b> | 1259 | 1911 | <b>1585</b>   |
| FTMT     | 0,191281  | NaN       | <b>0,191281</b>  | 1647 | NaN  | <b>1647</b>   |
| OTUB1    | -0,121291 | 0,504225  | <b>0,191467</b>  | 1680 | 2125 | <b>1902,5</b> |
| C15orf43 | 0,191639  | NaN       | <b>0,191639</b>  | 1672 | NaN  | <b>1672</b>   |
| EXOC5    | 0,672818  | -0,289302 | <b>0,191758</b>  | 1738 | 2864 | <b>2301</b>   |
| CNBD1    | 0,5738    | -0,190189 | <b>0,1918055</b> | 1780 | 2295 | <b>2037,5</b> |
| C16orf70 | -1,530338 | 1,914189  | <b>0,1919255</b> | 1534 | 1853 | <b>1693,5</b> |
| NPLOC4   | 0,192035  | NaN       | <b>0,192035</b>  | 1360 | NaN  | <b>1360</b>   |
| FUT2     | 0,639117  | -0,254967 | <b>0,192075</b>  | 1813 | 3243 | <b>2528</b>   |
| FZD3     | -0,025911 | 0,410471  | <b>0,19228</b>   | 1507 | 2217 | <b>1862</b>   |
| VAT1L    | 0,339534  | 0,045266  | <b>0,1924</b>    | 1774 | 1740 | <b>1757</b>   |
| RANBP2   | 0,220944  | 0,164023  | <b>0,1924835</b> | 1910 | 1827 | <b>1868,5</b> |
| CDH13    | -0,400414 | 0,785647  | <b>0,1926165</b> | 1528 | 1759 | <b>1643,5</b> |
| KBTBD12  | 0,192627  | NaN       | <b>0,192627</b>  | 1661 | NaN  | <b>1661</b>   |
| MRPL22   | 0,964009  | -0,578596 | <b>0,1927065</b> | 1537 | 2159 | <b>1848</b>   |
| EXOC6    | 0,19281   | NaN       | <b>0,19281</b>   | 1875 | NaN  | <b>1875</b>   |
| RAB3D    | 0,129056  | 0,256569  | <b>0,1928125</b> | 1869 | 1793 | <b>1831</b>   |
| FBXW5    | 0,634963  | -0,249201 | <b>0,192881</b>  | 1381 | 1978 | <b>1679,5</b> |
| SLC7A4   | 0,347732  | 0,038665  | <b>0,1931985</b> | 1778 | 2276 | <b>2027</b>   |
| PTGS1    | 0,158618  | 0,227806  | <b>0,193212</b>  | 1643 | 2689 | <b>2166</b>   |
| C2orf44  | -0,045257 | 0,43221   | <b>0,1934765</b> | 1792 | 2023 | <b>1907,5</b> |
| PGLYRP3  | 0,137186  | 0,250193  | <b>0,1936895</b> | 1268 | 2198 | <b>1733</b>   |
| ABCC3    | 0,46754   | -0,080119 | <b>0,1937105</b> | 1515 | 2267 | <b>1891</b>   |
| FARP1    | -0,427669 | 0,815303  | <b>0,193817</b>  | 1148 | 1640 | <b>1394</b>   |
| RCSD1    | 0,115173  | 0,272572  | <b>0,1938725</b> | 1401 | 1761 | <b>1581</b>   |
| PDZK1IP1 | -0,689523 | 1,077358  | <b>0,1939175</b> | 1824 | 2163 | <b>1993,5</b> |
| LSM6     | 0,261025  | 0,12689   | <b>0,1939575</b> | 788  | 1145 | <b>966,5</b>  |
| GJB6     | 0,217014  | 0,171436  | <b>0,194225</b>  | 688  | 977  | <b>832,5</b>  |
| PTH      | 0,442153  | -0,053612 | <b>0,1942705</b> | 1828 | 2126 | <b>1977</b>   |
| EEA1     | -0,637061 | 1,025644  | <b>0,1942915</b> | 1653 | 2145 | <b>1899</b>   |
| DUSP19   | 0,25521   | 0,133382  | <b>0,194296</b>  | 1776 | 2286 | <b>2031</b>   |
| OR52B4   | 0,329076  | 0,059795  | <b>0,1944355</b> | 2062 | 2095 | <b>2078,5</b> |
| ALX4     | -0,180363 | 0,569393  | <b>0,194515</b>  | 1803 | 2988 | <b>2395,5</b> |
| ZNF521   | -0,131699 | 0,520893  | <b>0,194597</b>  | 1681 | 1968 | <b>1824,5</b> |

|           |           |           |                  |      |      |               |
|-----------|-----------|-----------|------------------|------|------|---------------|
| AKIP1     | 0,194647  | NaN       | <b>0,194647</b>  | 1641 | NaN  | <b>1641</b>   |
| LOC285033 | 0,065833  | 0,32386   | <b>0,1948465</b> | 504  | 1639 | <b>1071,5</b> |
| DZIP1     | -0,581749 | 0,972053  | <b>0,195152</b>  | 1416 | 1742 | <b>1579</b>   |
| TAS1R1    | 0,075565  | 0,314878  | <b>0,1952215</b> | 1712 | 2267 | <b>1989,5</b> |
| CKAP4     | 0,785098  | -0,394544 | <b>0,195277</b>  | 1296 | 1409 | <b>1352,5</b> |
| ATAD2     | -0,021992 | 0,412605  | <b>0,1953065</b> | 2019 | 3374 | <b>2696,5</b> |
| NMT1      | -0,430415 | 0,821163  | <b>0,195374</b>  | 986  | 1648 | <b>1317</b>   |
| ZFP14     | 0,195394  | NaN       | <b>0,195394</b>  | 1532 | NaN  | <b>1532</b>   |
| NOX1      | 0,431398  | -0,039877 | <b>0,1957605</b> | 1970 | 2627 | <b>2298,5</b> |
| HNRNPH3   | 0,195813  | NaN       | <b>0,195813</b>  | 1535 | NaN  | <b>1535</b>   |
| OR10H3    | 0,195835  | NaN       | <b>0,195835</b>  | 1858 | NaN  | <b>1858</b>   |
| RNF31     | -0,28265  | 0,67438   | <b>0,195865</b>  | 1606 | 2533 | <b>2069,5</b> |
| SPACA1    | 0,601682  | -0,209553 | <b>0,1960645</b> | 1461 | 2071 | <b>1766</b>   |
| PLA1A     | 1,531281  | -1,13896  | <b>0,1961605</b> | 1007 | 1526 | <b>1266,5</b> |
| ROS1      | 0,082839  | 0,309924  | <b>0,1963815</b> | 2069 | 2102 | <b>2085,5</b> |
| C16orf57  | 0,594509  | -0,200883 | <b>0,196813</b>  | 1462 | 1709 | <b>1585,5</b> |
| MPHOSPH10 | 0,053968  | 0,340039  | <b>0,1970035</b> | 968  | 1932 | <b>1450</b>   |
| OR10J3    | 0,197104  | NaN       | <b>0,197104</b>  | 766  | NaN  | <b>766</b>    |
| SELPLG    | -0,157925 | 0,552641  | <b>0,197358</b>  | 1580 | 1947 | <b>1763,5</b> |
| BAG2      | -0,374114 | 0,769015  | <b>0,1974505</b> | 1668 | 2321 | <b>1994,5</b> |
| HLCS      | 0,298142  | 0,097052  | <b>0,197597</b>  | 1485 | 2669 | <b>2077</b>   |
| MRPS31    | -0,570425 | 0,965635  | <b>0,197605</b>  | 1874 | 1317 | <b>1595,5</b> |
| SYT11     | 0,460943  | -0,06562  | <b>0,1976615</b> | 1712 | 2008 | <b>1860</b>   |
| NKPD1     | 0,197664  | NaN       | <b>0,197664</b>  | 1618 | NaN  | <b>1618</b>   |
| DHRS2     | -1,015073 | 1,410835  | <b>0,197881</b>  | 1891 | 2116 | <b>2003,5</b> |
| SPR       | 0,097803  | 0,298131  | <b>0,197967</b>  | 2030 | 2208 | <b>2119</b>   |
| BCL10     | -0,178581 | 0,574684  | <b>0,1980515</b> | 1404 | 2031 | <b>1717,5</b> |
| GFPT1     | 0,53885   | -0,14274  | <b>0,198055</b>  | 1771 | 2875 | <b>2323</b>   |
| AASDHPPT  | 0,181163  | 0,215422  | <b>0,1982925</b> | 1639 | 2037 | <b>1838</b>   |
| MRPL41    | -0,042742 | 0,439552  | <b>0,198405</b>  | 1827 | 1834 | <b>1830,5</b> |
| ITSN1     | 0,198437  | NaN       | <b>0,198437</b>  | 1757 | NaN  | <b>1757</b>   |
| PYGO1     | 0,965051  | -0,568081 | <b>0,198485</b>  | 2085 | 1938 | <b>2011,5</b> |
| LIPG      | -0,634179 | 1,031557  | <b>0,198689</b>  | 1309 | 1527 | <b>1418</b>   |
| RFPL3     | 0,089479  | 0,30811   | <b>0,1987945</b> | 2039 | 2968 | <b>2503,5</b> |

|           |           |           |                  |      |      |               |
|-----------|-----------|-----------|------------------|------|------|---------------|
| TNNC2     | 0,476957  | -0,079278 | <b>0,1988395</b> | 1442 | 1905 | <b>1673,5</b> |
| TUBB2B    | 0,198899  | NaN       | <b>0,198899</b>  | 1889 | NaN  | <b>1889</b>   |
| C20orf151 | -0,601297 | 0,999111  | <b>0,198907</b>  | 1196 | 2149 | <b>1672,5</b> |
| CDCA2     | 0,031997  | 0,365864  | <b>0,1989305</b> | 1382 | 1478 | <b>1430</b>   |
| ABL1      | -0,061679 | 0,45966   | <b>0,1989905</b> | 1705 | 1765 | <b>1735</b>   |
| NOTCH4    | 0,546892  | -0,148821 | <b>0,1990355</b> | 1186 | 2269 | <b>1727,5</b> |
| SNX1      | 0,798259  | -0,39957  | <b>0,1993445</b> | 1694 | 2823 | <b>2258,5</b> |
| SGPP2     | 0,114274  | 0,28458   | <b>0,199427</b>  | 1445 | 2067 | <b>1756</b>   |
| PHKA2     | 0,193267  | 0,205659  | <b>0,199463</b>  | 2046 | 2212 | <b>2129</b>   |
| TARBP2    | -0,309506 | 0,708727  | <b>0,1996105</b> | 1752 | 2023 | <b>1887,5</b> |
| SNX25     | -0,335169 | 0,734431  | <b>0,199631</b>  | 1452 | 2192 | <b>1822</b>   |
| CCDC81    | 0,199685  | NaN       | <b>0,199685</b>  | 1513 | NaN  | <b>1513</b>   |
| DBP       | 0,555496  | -0,155967 | <b>0,1997645</b> | 1454 | 1802 | <b>1628</b>   |
| CLYBL     | 0,080502  | 0,319088  | <b>0,199795</b>  | 1625 | 2058 | <b>1841,5</b> |
| FIBP      | 0,19983   | NaN       | <b>0,19983</b>   | 1918 | NaN  | <b>1918</b>   |
| CCDC75    | 0,252834  | 0,146868  | <b>0,199851</b>  | 1734 | 2676 | <b>2205</b>   |
| ZNF436    | -0,333353 | 0,733722  | <b>0,2001845</b> | 1563 | 2067 | <b>1815</b>   |
| MST1R     | 0,101064  | 0,299486  | <b>0,200275</b>  | 1797 | 2381 | <b>2089</b>   |
| OR10A6    | -0,0919   | 0,492886  | <b>0,200493</b>  | 1747 | 2708 | <b>2227,5</b> |
| WNT6      | 0,121411  | 0,279609  | <b>0,20051</b>   | 1723 | 2158 | <b>1940,5</b> |
| C17orf48  | 0,437896  | -0,035956 | <b>0,20097</b>   | 2078 | 2862 | <b>2470</b>   |
| ATP1B2    | 0,196233  | 0,206133  | <b>0,201183</b>  | 912  | 1422 | <b>1167</b>   |
| PPDPF     | 0,201188  | NaN       | <b>0,201188</b>  | 1560 | NaN  | <b>1560</b>   |
| HNF4G     | 0,94411   | -0,541642 | <b>0,201234</b>  | 1627 | 2263 | <b>1945</b>   |
| C7orf44   | 0,201318  | NaN       | <b>0,201318</b>  | 1733 | NaN  | <b>1733</b>   |
| ZNF777    | 0,201426  | NaN       | <b>0,201426</b>  | 1686 | NaN  | <b>1686</b>   |
| PPFIBP2   | 0,681162  | -0,278187 | <b>0,2014875</b> | 1226 | 2097 | <b>1661,5</b> |
| SRPK3     | -0,07046  | 0,473524  | <b>0,201532</b>  | 1525 | 2301 | <b>1913</b>   |
| NUDT12    | 0,335311  | 0,067782  | <b>0,2015465</b> | 1679 | 2441 | <b>2060</b>   |
| SMC3      | 0,20181   | NaN       | <b>0,20181</b>   | 1872 | NaN  | <b>1872</b>   |
| BMP7      | 0,663885  | -0,259604 | <b>0,2021405</b> | 1418 | 1355 | <b>1386,5</b> |
| AP2A2     | 1,228126  | -0,823701 | <b>0,2022125</b> | 1013 | 1984 | <b>1498,5</b> |
| GSN       | -0,00324  | 0,407936  | <b>0,202348</b>  | 1432 | 1452 | <b>1442</b>   |
| SLC30A7   | 0,198895  | 0,206027  | <b>0,202461</b>  | 1570 | 2260 | <b>1915</b>   |

|           |           |           |                  |      |      |               |
|-----------|-----------|-----------|------------------|------|------|---------------|
| PAK4      | -0,046545 | 0,451675  | <b>0,202565</b>  | 1772 | 2117 | <b>1944,5</b> |
| TMEM8B    | 1,394424  | -0,989218 | <b>0,202603</b>  | 2037 | 2076 | <b>2056,5</b> |
| RTF1      | 0,202655  | NaN       | <b>0,202655</b>  | 1856 | NaN  | <b>1856</b>   |
| C1orf111  | 0,017995  | 0,387626  | <b>0,2028105</b> | 2050 | 1784 | <b>1917</b>   |
| DES       | 1,641958  | -1,23621  | <b>0,202874</b>  | 1659 | 2163 | <b>1911</b>   |
| BOLA3     | 0,096816  | 0,309513  | <b>0,2031645</b> | 1658 | 2167 | <b>1912,5</b> |
| POLR3D    | 0,41402   | -0,007124 | <b>0,203448</b>  | 1765 | 2073 | <b>1919</b>   |
| CGNL1     | 0,203905  | NaN       | <b>0,203905</b>  | 1111 | NaN  | <b>1111</b>   |
| HLA-DOA   | -0,628265 | 1,036595  | <b>0,204165</b>  | 1960 | 2317 | <b>2138,5</b> |
| THSD7B    | 0,204248  | NaN       | <b>0,204248</b>  | 1725 | NaN  | <b>1725</b>   |
| CD99      | 0,204272  | NaN       | <b>0,204272</b>  | 1304 | NaN  | <b>1304</b>   |
| LRSAM1    | -0,003934 | 0,412541  | <b>0,2043035</b> | 2121 | 2701 | <b>2411</b>   |
| ITGB3BP   | 0,204369  | NaN       | <b>0,204369</b>  | 1927 | NaN  | <b>1927</b>   |
| MAGED2    | -0,281711 | 0,690572  | <b>0,2044305</b> | 1690 | 2238 | <b>1964</b>   |
| NT5M      | -0,465981 | 0,875099  | <b>0,204559</b>  | 1662 | 1799 | <b>1730,5</b> |
| TMEM125   | 0,204632  | NaN       | <b>0,204632</b>  | 1351 | NaN  | <b>1351</b>   |
| ACSM3     | -0,094285 | 0,504107  | <b>0,204911</b>  | 1800 | 1825 | <b>1812,5</b> |
| ELAC2     | -0,288093 | 0,69829   | <b>0,2050985</b> | 1346 | 2116 | <b>1731</b>   |
| MRPL44    | 0,509972  | -0,099372 | <b>0,2053</b>    | 1449 | 2108 | <b>1778,5</b> |
| BCKDHA    | 0,924945  | -0,514317 | <b>0,205314</b>  | 1332 | 1803 | <b>1567,5</b> |
| GAL       | 1,526874  | -1,116076 | <b>0,205399</b>  | 894  | 1190 | <b>1042</b>   |
| OR5E4     | 0,520646  | -0,109374 | <b>0,205636</b>  | 1903 | 3214 | <b>2558,5</b> |
| CCDC115   | 0,205638  | NaN       | <b>0,205638</b>  | 1792 | NaN  | <b>1792</b>   |
| PROX2     | 0,205832  | NaN       | <b>0,205832</b>  | 1374 | NaN  | <b>1374</b>   |
| EEF2K     | 0,736414  | -0,324299 | <b>0,2060575</b> | 1390 | 1583 | <b>1486,5</b> |
| GRWD1     | 0,320834  | 0,092177  | <b>0,2065055</b> | 1397 | 2017 | <b>1707</b>   |
| NECAP1    | 0,76096   | -0,347932 | <b>0,206514</b>  | 1553 | 1622 | <b>1587,5</b> |
| USP50     | 0,525448  | -0,112407 | <b>0,2065205</b> | 1487 | 2014 | <b>1750,5</b> |
| SMURF2    | 0,127573  | 0,285637  | <b>0,206605</b>  | 1896 | 2927 | <b>2411,5</b> |
| TNFRSF10D | 1,237664  | -0,82365  | <b>0,207007</b>  | 2018 | 2322 | <b>2170</b>   |
| CCNL1     | 0,009184  | 0,404915  | <b>0,2070495</b> | 1900 | 2114 | <b>2007</b>   |
| ORAI3     | 0,532687  | -0,11846  | <b>0,2071135</b> | 1699 | 2593 | <b>2146</b>   |
| ZBTB11    | -0,420228 | 0,835065  | <b>0,2074185</b> | 1353 | 1848 | <b>1600,5</b> |
| C14orf80  | 0,246704  | 0,168314  | <b>0,207509</b>  | 1393 | 1788 | <b>1590,5</b> |

|         |           |           |                  |      |      |               |
|---------|-----------|-----------|------------------|------|------|---------------|
| GIN1    | 0,026604  | 0,38912   | <b>0,207862</b>  | 2039 | 2857 | <b>2448</b>   |
| BRWD3   | 0,207892  | NaN       | <b>0,207892</b>  | 1846 | NaN  | <b>1846</b>   |
| PRB4    | 0,547289  | -0,131469 | <b>0,20791</b>   | 2381 | 2334 | <b>2357,5</b> |
| CST9L   | 0,04559   | 0,37039   | <b>0,20799</b>   | 1816 | 2336 | <b>2076</b>   |
| FIG4    | 0,631399  | -0,215348 | <b>0,2080255</b> | 2027 | 2708 | <b>2367,5</b> |
| ZBTB6   | 0,208089  | NaN       | <b>0,208089</b>  | 1434 | NaN  | <b>1434</b>   |
| TMOD3   | 0,725244  | -0,309028 | <b>0,208108</b>  | 1800 | 2134 | <b>1967</b>   |
| MTRF1   | -0,219479 | 0,636152  | <b>0,2083365</b> | 1723 | 2356 | <b>2039,5</b> |
| EPYC    | 0,208384  | NaN       | <b>0,208384</b>  | 1950 | NaN  | <b>1950</b>   |
| WHSC1L1 | 0,349568  | 0,067423  | <b>0,2084955</b> | 1516 | 2505 | <b>2010,5</b> |
| NEK11   | 0,271863  | 0,145351  | <b>0,208607</b>  | 1577 | 2040 | <b>1808,5</b> |
| KBTBD3  | -0,134486 | 0,551867  | <b>0,2086905</b> | 1739 | 2306 | <b>2022,5</b> |
| CPNE9   | -0,171899 | 0,589286  | <b>0,2086935</b> | 1570 | 2177 | <b>1873,5</b> |
| NDST2   | -0,079991 | 0,497409  | <b>0,208709</b>  | 1494 | 2067 | <b>1780,5</b> |
| GSTO1   | 0,518863  | -0,101054 | <b>0,2089045</b> | 1353 | 1924 | <b>1638,5</b> |
| ATP2C1  | -0,056594 | 0,474433  | <b>0,2089195</b> | 1690 | 1731 | <b>1710,5</b> |
| CACNG1  | -0,39636  | 0,814336  | <b>0,208988</b>  | 1322 | 2764 | <b>2043</b>   |
| ABHD12  | 0,908357  | -0,490099 | <b>0,209129</b>  | 1625 | 1969 | <b>1797</b>   |
| NIPAL1  | 0,209236  | NaN       | <b>0,209236</b>  | 1967 | NaN  | <b>1967</b>   |
| CLEC10A | 0,301746  | 0,116979  | <b>0,2093625</b> | 1718 | 1985 | <b>1851,5</b> |
| OR5M11  | 0,021047  | 0,398094  | <b>0,2095705</b> | 1891 | 2763 | <b>2327</b>   |
| MCOLN2  | 0,646215  | -0,22706  | <b>0,2095775</b> | 2064 | 2309 | <b>2186,5</b> |
| HMOX2   | 0,877479  | -0,457458 | <b>0,2100105</b> | 2217 | 2116 | <b>2166,5</b> |
| PTGFRN  | 0,775644  | -0,355619 | <b>0,2100125</b> | 2071 | 2551 | <b>2311</b>   |
| TMEM116 | 0,210253  | NaN       | <b>0,210253</b>  | 1653 | NaN  | <b>1653</b>   |
| SV2B    | 0,418286  | 0,002356  | <b>0,210321</b>  | 1474 | 1848 | <b>1661</b>   |
| GLYCTK  | 0,020149  | 0,400775  | <b>0,210462</b>  | 1407 | 2286 | <b>1846,5</b> |
| DNPEP   | -0,055771 | 0,477135  | <b>0,210682</b>  | 1909 | 1519 | <b>1714</b>   |
| OR5M3   | -0,309549 | 0,730936  | <b>0,2106935</b> | 1612 | 1369 | <b>1490,5</b> |
| PCGF3   | 0,617438  | -0,196009 | <b>0,2107145</b> | 1335 | 2317 | <b>1826</b>   |
| KRT81   | 0,869026  | -0,447558 | <b>0,210734</b>  | 1745 | 1736 | <b>1740,5</b> |
| PROX1   | NaN       | 0,210951  | <b>0,210951</b>  | NaN  | 2623 | <b>2623</b>   |
| WDFY1   | 0,210967  | NaN       | <b>0,210967</b>  | 1746 | NaN  | <b>1746</b>   |
| UTP3    | 0,609512  | -0,18757  | <b>0,210971</b>  | 1534 | 1693 | <b>1613,5</b> |



|          |           |           |                  |      |      |               |
|----------|-----------|-----------|------------------|------|------|---------------|
| ZNF765   | 0,364136  | 0,057872  | <b>0,211004</b>  | 1821 | 2558 | <b>2189,5</b> |
| TNFSF4   | 0,267843  | 0,154317  | <b>0,21108</b>   | 2110 | 2114 | <b>2112</b>   |
| C11orf65 | -0,435393 | 0,857752  | <b>0,2111795</b> | 1612 | 2197 | <b>1904,5</b> |
| SLC35D1  | 0,50856   | -0,086163 | <b>0,2111985</b> | 1412 | 2332 | <b>1872</b>   |
| DNAJB1   | 0,211301  | NaN       | <b>0,211301</b>  | 1002 | NaN  | <b>1002</b>   |
| ADAM7    | 0,269041  | 0,154073  | <b>0,211557</b>  | 1631 | 2369 | <b>2000</b>   |
| SLC2A10  | 0,637101  | -0,213779 | <b>0,211661</b>  | 1291 | 1684 | <b>1487,5</b> |
| KDM5A    | 0,082865  | 0,340506  | <b>0,2116855</b> | 1665 | 2396 | <b>2030,5</b> |
| SLC7A7   | 0,643695  | -0,220014 | <b>0,2118405</b> | 1642 | 2116 | <b>1879</b>   |
| FOXA3    | 0,321863  | 0,102342  | <b>0,2121025</b> | 2034 | 2151 | <b>2092,5</b> |
| MSI1     | -0,479432 | 0,903751  | <b>0,2121595</b> | 1332 | 1585 | <b>1458,5</b> |
| FBXL2    | 0,216415  | 0,208297  | <b>0,212356</b>  | 1890 | 2505 | <b>2197,5</b> |
| MORC3    | 0,609398  | -0,184627 | <b>0,2123855</b> | 1390 | 2323 | <b>1856,5</b> |
| PPM1D    | 0,796651  | -0,371592 | <b>0,2125295</b> | 1898 | 2558 | <b>2228</b>   |
| SQLE     | 0,25471   | 0,170654  | <b>0,212682</b>  | 1767 | 2387 | <b>2077</b>   |
| YRDC     | 0,262698  | 0,162944  | <b>0,212821</b>  | 1475 | 2323 | <b>1899</b>   |
| GALNT5   | -0,17289  | 0,599283  | <b>0,2131965</b> | 1539 | 1940 | <b>1739,5</b> |
| TMLHE    | -0,126402 | 0,55309   | <b>0,213344</b>  | 1208 | 1627 | <b>1417,5</b> |
| VARS     | 0,426653  | 0,00011   | <b>0,2133815</b> | 2028 | 2146 | <b>2087</b>   |
| PAGE4    | -0,386362 | 0,813211  | <b>0,2134245</b> | 1210 | 2083 | <b>1646,5</b> |
| IGSF3    | 0,215704  | 0,21208   | <b>0,213892</b>  | 1231 | 1748 | <b>1489,5</b> |
| SMG6     | 0,751477  | -0,323149 | <b>0,214164</b>  | 2054 | 2375 | <b>2214,5</b> |
| CSF2RB   | 0,361997  | 0,067192  | <b>0,2145945</b> | 1742 | 2325 | <b>2033,5</b> |
| C1orf201 | 0,165761  | 0,263475  | <b>0,214618</b>  | 1603 | 2088 | <b>1845,5</b> |
| FIBCD1   | 0,214799  | NaN       | <b>0,214799</b>  | 1271 | NaN  | <b>1271</b>   |
| GAS6     | 0,214931  | NaN       | <b>0,214931</b>  | 1562 | NaN  | <b>1562</b>   |
| GPRIN1   | 0,176076  | 0,253862  | <b>0,214969</b>  | 1399 | 1876 | <b>1637,5</b> |
| TCF19    | 0,743237  | -0,312751 | <b>0,215243</b>  | 1868 | 2272 | <b>2070</b>   |
| SAT1     | NaN       | 0,215419  | <b>0,215419</b>  | NaN  | 2691 | <b>2691</b>   |
| CD3E     | 0,193865  | 0,237483  | <b>0,215674</b>  | 1491 | 1990 | <b>1740,5</b> |
| ATOX1    | 0,410383  | 0,021173  | <b>0,215778</b>  | 1370 | 2152 | <b>1761</b>   |
| IFNGR1   | -0,205935 | 0,637758  | <b>0,2159115</b> | 1712 | 1943 | <b>1827,5</b> |
| CDCA7    | -0,227559 | 0,659388  | <b>0,2159145</b> | 1495 | 2317 | <b>1906</b>   |
| CCR1     | 0,216032  | NaN       | <b>0,216032</b>  | 1853 | NaN  | <b>1853</b>   |

|          |           |           |                  |      |      |               |
|----------|-----------|-----------|------------------|------|------|---------------|
| KCNT2    | 0,527164  | -0,09497  | <b>0,216097</b>  | 1167 | 2135 | <b>1651</b>   |
| TIPIN    | 0,216429  | NaN       | <b>0,216429</b>  | 1524 | NaN  | <b>1524</b>   |
| CKB      | 0,491018  | -0,057187 | <b>0,2169155</b> | 1958 | 1650 | <b>1804</b>   |
| KIF13A   | 0,497388  | -0,06324  | <b>0,217074</b>  | 1067 | 2198 | <b>1632,5</b> |
| CCDC66   | 0,217156  | NaN       | <b>0,217156</b>  | 1727 | NaN  | <b>1727</b>   |
| LRRC10   | 0,161945  | 0,272626  | <b>0,2172855</b> | 1451 | 2257 | <b>1854</b>   |
| OR5B21   | -0,086296 | 0,520928  | <b>0,217316</b>  | 1855 | 1458 | <b>1656,5</b> |
| QPCT     | 1,26073   | -0,825716 | <b>0,217507</b>  | 1403 | 1708 | <b>1555,5</b> |
| UHRF2    | 0,288014  | 0,147397  | <b>0,2177055</b> | 1537 | 2515 | <b>2026</b>   |
| UBR5     | -0,09701  | 0,532577  | <b>0,2177835</b> | 546  | 993  | <b>769,5</b>  |
| DEGS1    | 1,637297  | -1,201623 | <b>0,217837</b>  | 2013 | 2230 | <b>2121,5</b> |
| NAA16    | -0,255312 | 0,691103  | <b>0,2178955</b> | 1745 | 3072 | <b>2408,5</b> |
| OR9G4    | 1,713691  | -1,277454 | <b>0,2181185</b> | 1658 | 1913 | <b>1785,5</b> |
| CRTC1    | 0,796833  | -0,360411 | <b>0,218211</b>  | 1376 | 2183 | <b>1779,5</b> |
| SERPINA6 | 0,402003  | 0,03443   | <b>0,2182165</b> | 1196 | 2055 | <b>1625,5</b> |
| SEC16A   | 0,261933  | 0,175045  | <b>0,218489</b>  | 1392 | 2096 | <b>1744</b>   |
| LCMT1    | 0,401378  | 0,03577   | <b>0,218574</b>  | 1712 | 2717 | <b>2214,5</b> |
| AP4B1    | 0,621677  | -0,184509 | <b>0,218584</b>  | 1330 | 1843 | <b>1586,5</b> |
| CFDP1    | 0,302633  | 0,134591  | <b>0,218612</b>  | 1769 | 2762 | <b>2265,5</b> |
| E2F2     | 0,081594  | 0,355733  | <b>0,2186635</b> | 1726 | 1953 | <b>1839,5</b> |
| CTSE     | 0,533957  | -0,096567 | <b>0,218695</b>  | 1600 | 2099 | <b>1849,5</b> |
| C7orf33  | 0,390884  | 0,046829  | <b>0,2188565</b> | 1597 | 1640 | <b>1618,5</b> |
| PLAC4    | 0,861419  | -0,423694 | <b>0,2188625</b> | 1829 | 2119 | <b>1974</b>   |
| N4BP1    | 0,21922   | NaN       | <b>0,21922</b>   | 1641 | NaN  | <b>1641</b>   |
| DYNC1I2  | 0,363201  | 0,076124  | <b>0,2196625</b> | 755  | 1174 | <b>964,5</b>  |
| ABCC8    | -0,678872 | 1,11821   | <b>0,219669</b>  | 1359 | 2055 | <b>1707</b>   |
| LIPE     | -0,07943  | 0,518883  | <b>0,2197265</b> | 1540 | 1594 | <b>1567</b>   |
| ZNF202   | -0,473126 | 0,912867  | <b>0,2198705</b> | 1186 | 1834 | <b>1510</b>   |
| EGFLAM   | 0,983595  | -0,543849 | <b>0,219873</b>  | 1464 | 2038 | <b>1751</b>   |
| MAP3K9   | 1,016624  | -0,576708 | <b>0,219958</b>  | 1712 | 2065 | <b>1888,5</b> |
| STMN4    | -0,152043 | 0,592604  | <b>0,2202805</b> | 1763 | 2632 | <b>2197,5</b> |
| BCAS1    | 0,031907  | 0,408991  | <b>0,220449</b>  | 1721 | 2608 | <b>2164,5</b> |
| PRKRIR   | 0,650314  | -0,209013 | <b>0,2206505</b> | 2042 | 2170 | <b>2106</b>   |
| ZNF71    | 0,220717  | NaN       | <b>0,220717</b>  | 945  | NaN  | <b>945</b>    |

|          |           |           |                  |      |      |               |
|----------|-----------|-----------|------------------|------|------|---------------|
| RASSF7   | 0,220766  | NaN       | <b>0,220766</b>  | 1024 | NaN  | <b>1024</b>   |
| OR8G1    | 0,621705  | -0,179963 | <b>0,220871</b>  | 1972 | 2012 | <b>1992</b>   |
| C1orf94  | -0,013223 | 0,455026  | <b>0,2209015</b> | 1612 | 2032 | <b>1822</b>   |
| 06-sept  | -0,019682 | 0,461549  | <b>0,2209335</b> | 959  | 1358 | <b>1158,5</b> |
| SGK2     | -0,038222 | 0,480129  | <b>0,2209535</b> | 1866 | 1631 | <b>1748,5</b> |
| OR2AT4   | -0,607738 | 1,04968   | <b>0,220971</b>  | 1820 | 2893 | <b>2356,5</b> |
| SSR4     | 0,391524  | 0,050656  | <b>0,22109</b>   | 1300 | 2016 | <b>1658</b>   |
| IRF2BP1  | 0,30268   | 0,139647  | <b>0,2211635</b> | 1617 | 2266 | <b>1941,5</b> |
| CLDN18   | 0,450091  | -0,007607 | <b>0,221242</b>  | 1943 | 2491 | <b>2217</b>   |
| ADAMTS4  | 0,152259  | 0,290363  | <b>0,221311</b>  | 1901 | 2189 | <b>2045</b>   |
| LCOR     | 0,00449   | 0,438356  | <b>0,221423</b>  | 1733 | 2458 | <b>2095,5</b> |
| PLEKHO2  | 0,221683  | NaN       | <b>0,221683</b>  | 1480 | NaN  | <b>1480</b>   |
| RNF20    | 0,107991  | 0,335558  | <b>0,2217745</b> | 1565 | 2871 | <b>2218</b>   |
| CORIN    | 0,134158  | 0,309429  | <b>0,2217935</b> | 1881 | 2495 | <b>2188</b>   |
| KIAA1370 | 0,486836  | -0,04289  | <b>0,221973</b>  | 2094 | 2751 | <b>2422,5</b> |
| HSD11B2  | 0,830185  | -0,38606  | <b>0,2220625</b> | 2080 | 2998 | <b>2539</b>   |
| GPR148   | 0,222125  | NaN       | <b>0,222125</b>  | 1422 | NaN  | <b>1422</b>   |
| ACSS2    | 0,484689  | -0,040073 | <b>0,222308</b>  | 820  | 1557 | <b>1188,5</b> |
| TGM7     | -0,473417 | 0,918074  | <b>0,2223285</b> | 1104 | 1380 | <b>1242</b>   |
| PARP12   | 0,904609  | -0,459948 | <b>0,2223305</b> | 1249 | 1517 | <b>1383</b>   |
| KIAA0355 | -0,699677 | 1,14529   | <b>0,2228065</b> | 1762 | 2381 | <b>2071,5</b> |
| OR51E1   | -1,1498   | 1,595683  | <b>0,2229415</b> | 2089 | 1986 | <b>2037,5</b> |
| FAM100A  | 0,222976  | NaN       | <b>0,222976</b>  | 1833 | NaN  | <b>1833</b>   |
| FAM118B  | 0,388154  | 0,0579    | <b>0,223027</b>  | 1477 | 2087 | <b>1782</b>   |
| CA7      | 0,31412   | 0,132306  | <b>0,223213</b>  | 1268 | 1645 | <b>1456,5</b> |
| MAK      | 0,051534  | 0,395721  | <b>0,2236275</b> | 2224 | 2577 | <b>2400,5</b> |
| CCDC28A  | -0,017989 | 0,465369  | <b>0,22369</b>   | 1921 | 2476 | <b>2198,5</b> |
| ANKRD50  | 0,110885  | 0,336807  | <b>0,223846</b>  | 2000 | 2058 | <b>2029</b>   |
| OSGEP    | -1,076764 | 1,52465   | <b>0,223943</b>  | 1805 | 1928 | <b>1866,5</b> |
| CCDC117  | 1,117122  | -0,668824 | <b>0,224149</b>  | 1824 | 1983 | <b>1903,5</b> |
| TEX19    | -0,695466 | 1,143873  | <b>0,2242035</b> | 1588 | 2455 | <b>2021,5</b> |
| ABHD1    | 0,158222  | 0,290271  | <b>0,2242465</b> | 1618 | 2333 | <b>1975,5</b> |
| EFHA1    | 0,224418  | NaN       | <b>0,224418</b>  | 1894 | NaN  | <b>1894</b>   |
| ME3      | -0,263049 | 0,711994  | <b>0,2244725</b> | 1700 | 1886 | <b>1793</b>   |

|           |           |           |                  |      |      |               |
|-----------|-----------|-----------|------------------|------|------|---------------|
| HTR1A     | -0,411756 | 0,860876  | <b>0,22456</b>   | 1711 | 1671 | <b>1691</b>   |
| RAB11FIP4 | -0,510982 | 0,960292  | <b>0,224655</b>  | 1283 | 2226 | <b>1754,5</b> |
| WASL      | 0,514465  | -0,06509  | <b>0,2246875</b> | 1572 | 2163 | <b>1867,5</b> |
| MAG       | 0,224795  | NaN       | <b>0,224795</b>  | 1355 | NaN  | <b>1355</b>   |
| AGAP3     | 0,29828   | 0,151444  | <b>0,224862</b>  | 1225 | 1418 | <b>1321,5</b> |
| TRAM2     | 0,225202  | NaN       | <b>0,225202</b>  | 2096 | NaN  | <b>2096</b>   |
| UBE2D2    | 1,292962  | -0,842547 | <b>0,2252075</b> | 1248 | 2354 | <b>1801</b>   |
| DOCK2     | 0,225253  | NaN       | <b>0,225253</b>  | 1673 | NaN  | <b>1673</b>   |
| ZC3H7A    | 0,225344  | NaN       | <b>0,225344</b>  | 2067 | NaN  | <b>2067</b>   |
| GRIN3A    | 0,128761  | 0,321968  | <b>0,2253645</b> | 1707 | 2389 | <b>2048</b>   |
| ZNF385A   | 0,287616  | 0,163292  | <b>0,225454</b>  | 1451 | 2152 | <b>1801,5</b> |
| LCE3E     | 0,510216  | -0,059121 | <b>0,2255475</b> | 1249 | 1675 | <b>1462</b>   |
| HAP1      | 0,253914  | 0,197379  | <b>0,2256465</b> | 468  | 1437 | <b>952,5</b>  |
| MINK1     | -0,206615 | 0,658049  | <b>0,225717</b>  | 1924 | 1787 | <b>1855,5</b> |
| TRAM1L1   | 0,225968  | NaN       | <b>0,225968</b>  | 1623 | NaN  | <b>1623</b>   |
| ZNF114    | 0,530929  | -0,078658 | <b>0,2261355</b> | 1616 | 1807 | <b>1711,5</b> |
| UBA3      | -0,476747 | 0,929961  | <b>0,226607</b>  | 1652 | 2374 | <b>2013</b>   |
| SMARCAL1  | 0,23587   | 0,217358  | <b>0,226614</b>  | 1298 | 1566 | <b>1432</b>   |
| AVPR1A    | -0,043577 | 0,496911  | <b>0,226667</b>  | 1718 | 1942 | <b>1830</b>   |
| OR2D3     | 0,226713  | NaN       | <b>0,226713</b>  | 1434 | NaN  | <b>1434</b>   |
| KCNJ16    | -0,075684 | 0,529838  | <b>0,227077</b>  | 1155 | 2213 | <b>1684</b>   |
| NTRK2     | -0,049905 | 0,504832  | <b>0,2274635</b> | 1277 | 1709 | <b>1493</b>   |
| ECM2      | -0,002492 | 0,457542  | <b>0,227525</b>  | 1810 | 2485 | <b>2147,5</b> |
| NAV3      | 0,852819  | -0,396956 | <b>0,2279315</b> | 1900 | 1878 | <b>1889</b>   |
| RBM3      | 0,263814  | 0,192099  | <b>0,2279565</b> | 1363 | 1600 | <b>1481,5</b> |
| BNC2      | 0,275447  | 0,180578  | <b>0,2280125</b> | 1080 | 2169 | <b>1624,5</b> |
| GAB2      | -0,557994 | 1,014414  | <b>0,22821</b>   | 1787 | 2149 | <b>1968</b>   |
| C3orf24   | 0,22822   | NaN       | <b>0,22822</b>   | 1055 | NaN  | <b>1055</b>   |
| MGST2     | 0,172108  | 0,284573  | <b>0,2283405</b> | 1323 | 1778 | <b>1550,5</b> |
| CAPN12    | -0,680397 | 1,137307  | <b>0,228455</b>  | 1195 | 1920 | <b>1557,5</b> |
| IER3IP1   | 0,067303  | 0,389854  | <b>0,2285785</b> | 1831 | 2056 | <b>1943,5</b> |
| FUT7      | 0,276625  | 0,181346  | <b>0,2289855</b> | 1507 | 2646 | <b>2076,5</b> |
| RHD       | 0,664909  | -0,206638 | <b>0,2291355</b> | 1839 | 2531 | <b>2185</b>   |
| HNRNPM    | 0,989154  | -0,530848 | <b>0,229153</b>  | 1465 | 1697 | <b>1581</b>   |

|           |           |           |                  |      |      |               |
|-----------|-----------|-----------|------------------|------|------|---------------|
| NKAPL     | 0,239313  | 0,219065  | <b>0,229189</b>  | 1627 | 2221 | <b>1924</b>   |
| THAP1     | 0,266767  | 0,191634  | <b>0,2292005</b> | 2042 | 2183 | <b>2112,5</b> |
| FXYD4     | 0,124826  | 0,333987  | <b>0,2294065</b> | 1819 | 2770 | <b>2294,5</b> |
| MPPED1    | 0,22947   | NaN       | <b>0,22947</b>   | 1390 | NaN  | <b>1390</b>   |
| GFPT2     | 1,199119  | -0,73932  | <b>0,2298995</b> | 1977 | 2124 | <b>2050,5</b> |
| SPAG1     | 0,25345   | 0,206354  | <b>0,229902</b>  | 1504 | 1521 | <b>1512,5</b> |
| UBL4B     | 0,570544  | -0,110649 | <b>0,2299475</b> | 1751 | 2699 | <b>2225</b>   |
| TYMP      | -0,126285 | 0,586574  | <b>0,2301445</b> | 1677 | 2622 | <b>2149,5</b> |
| GLRX5     | 0,658274  | -0,197712 | <b>0,230281</b>  | 1951 | 3055 | <b>2503</b>   |
| DCPS      | -0,217385 | 0,678079  | <b>0,230347</b>  | 2057 | 2664 | <b>2360,5</b> |
| TNFAIP8L1 | 1,032207  | -0,571177 | <b>0,230515</b>  | 1726 | 2607 | <b>2166,5</b> |
| ZFP161    | 0,568499  | -0,107423 | <b>0,230538</b>  | 1541 | 1707 | <b>1624</b>   |
| GPATCH3   | -0,33031  | 0,791422  | <b>0,230556</b>  | 1266 | 1914 | <b>1590</b>   |
| ERMAP     | 1,353117  | -0,891484 | <b>0,2308165</b> | 1629 | 1618 | <b>1623,5</b> |
| RNF220    | 0,232657  | 0,229146  | <b>0,2309015</b> | 2176 | 2709 | <b>2442,5</b> |
| PRKD2     | 0,459221  | 0,002638  | <b>0,2309295</b> | 1988 | 1961 | <b>1974,5</b> |
| THAP9     | 0,231024  | NaN       | <b>0,231024</b>  | 1423 | NaN  | <b>1423</b>   |
| PICK1     | 0,192801  | 0,26951   | <b>0,2311555</b> | 1816 | 2163 | <b>1989,5</b> |
| SP5       | 0,231363  | NaN       | <b>0,231363</b>  | 1798 | NaN  | <b>1798</b>   |
| PI3       | 0,026595  | 0,436752  | <b>0,2316735</b> | 1345 | 1264 | <b>1304,5</b> |
| C20orf134 | 0,642692  | -0,179289 | <b>0,2317015</b> | 1038 | 1221 | <b>1129,5</b> |
| GDF15     | -0,237202 | 0,700623  | <b>0,2317105</b> | 1449 | 1836 | <b>1642,5</b> |
| CD72      | 0,122834  | 0,340948  | <b>0,231891</b>  | 1680 | 2601 | <b>2140,5</b> |
| KRT15     | 0,681339  | -0,217475 | <b>0,231932</b>  | 1889 | 2078 | <b>1983,5</b> |
| C16orf71  | 0,232048  | NaN       | <b>0,232048</b>  | 1693 | NaN  | <b>1693</b>   |
| RBMX2     | 0,232182  | NaN       | <b>0,232182</b>  | 1565 | NaN  | <b>1565</b>   |
| SFTPB     | 0,504324  | -0,039609 | <b>0,2323575</b> | 1472 | 1910 | <b>1691</b>   |
| TNRC6C    | 0,047622  | 0,417235  | <b>0,2324285</b> | 1385 | 1738 | <b>1561,5</b> |
| LOXL1     | NaN       | 0,23249   | <b>0,23249</b>   | NaN  | 2237 | <b>2237</b>   |
| CCDC92    | 0,232759  | NaN       | <b>0,232759</b>  | 1458 | NaN  | <b>1458</b>   |
| PBX1      | -0,23962  | 0,705914  | <b>0,233147</b>  | 1802 | 1948 | <b>1875</b>   |
| ETFA      | 1,115585  | -0,649091 | <b>0,233247</b>  | 925  | 2288 | <b>1606,5</b> |
| TCF15     | 0,123124  | 0,343855  | <b>0,2334895</b> | 1659 | 2480 | <b>2069,5</b> |
| EEFSEC    | -0,029656 | 0,496714  | <b>0,233529</b>  | 1583 | 2225 | <b>1904</b>   |

|          |           |           |                  |      |      |               |
|----------|-----------|-----------|------------------|------|------|---------------|
| DHRS1    | 0,331945  | 0,135669  | <b>0,233807</b>  | 1401 | 1788 | <b>1594,5</b> |
| ALG1     | 0,57919   | -0,111367 | <b>0,2339115</b> | 1603 | 2697 | <b>2150</b>   |
| SSX1     | 0,559653  | -0,09128  | <b>0,2341865</b> | 1368 | 1996 | <b>1682</b>   |
| EPB41L1  | -0,247996 | 0,716487  | <b>0,2342455</b> | 2200 | 2276 | <b>2238</b>   |
| HSF1     | -0,483099 | 0,951922  | <b>0,2344115</b> | 1062 | 1611 | <b>1336,5</b> |
| GTF2H3   | 1,320332  | -0,851275 | <b>0,2345285</b> | 2061 | 2062 | <b>2061,5</b> |
| ACCN4    | -0,568527 | 1,037663  | <b>0,234568</b>  | 1089 | 2086 | <b>1587,5</b> |
| API5     | 0,762401  | -0,292703 | <b>0,234849</b>  | 1686 | 3068 | <b>2377</b>   |
| ABCB5    | 0,293082  | 0,176666  | <b>0,234874</b>  | 2110 | 2417 | <b>2263,5</b> |
| PARP9    | 0,125505  | 0,344252  | <b>0,2348785</b> | 1833 | 2221 | <b>2027</b>   |
| SYPL1    | -0,373184 | 0,84298   | <b>0,234898</b>  | 1770 | 2494 | <b>2132</b>   |
| TP53I3   | 0,807932  | -0,337501 | <b>0,2352155</b> | 1203 | 1817 | <b>1510</b>   |
| RGN      | 0,891595  | -0,421148 | <b>0,2352235</b> | 1199 | 1556 | <b>1377,5</b> |
| HMGB1    | 0,685571  | -0,214468 | <b>0,2355515</b> | 1365 | 2698 | <b>2031,5</b> |
| C10orf81 | 0,037794  | 0,433886  | <b>0,23584</b>   | 1374 | 1960 | <b>1667</b>   |
| DBX2     | 0,363997  | 0,107798  | <b>0,2358975</b> | 1429 | 2099 | <b>1764</b>   |
| RNF14    | -0,570372 | 1,042184  | <b>0,235906</b>  | 1779 | 2425 | <b>2102</b>   |
| GOLGA3   | 0,52153   | -0,04933  | <b>0,2361</b>    | 1510 | 2744 | <b>2127</b>   |
| MMP21    | 1,052786  | -0,580575 | <b>0,2361055</b> | 1406 | 1864 | <b>1635</b>   |
| ZNF382   | 0,236175  | NaN       | <b>0,236175</b>  | 1723 | NaN  | <b>1723</b>   |
| OGDH     | 0,133349  | 0,339327  | <b>0,236338</b>  | 1765 | 2134 | <b>1949,5</b> |
| LYPLA1   | 0,125813  | 0,348183  | <b>0,236998</b>  | 1610 | 1960 | <b>1785</b>   |
| OR52E6   | 0,744996  | -0,270988 | <b>0,237004</b>  | 1785 | 2173 | <b>1979</b>   |
| ADRA2A   | 0,41371   | 0,060372  | <b>0,237041</b>  | 1814 | 1873 | <b>1843,5</b> |
| CDH1     | 0,264315  | 0,210113  | <b>0,237214</b>  | 1963 | 2284 | <b>2123,5</b> |
| ADAMTS18 | -0,126347 | 0,600786  | <b>0,2372195</b> | 1463 | 1411 | <b>1437</b>   |
| PDE6H    | 0,229909  | 0,244878  | <b>0,2373935</b> | 1757 | 2139 | <b>1948</b>   |
| C1QC     | 0,237526  | NaN       | <b>0,237526</b>  | 1416 | NaN  | <b>1416</b>   |
| C12orf40 | 0,617882  | -0,142483 | <b>0,2376995</b> | 2002 | 2295 | <b>2148,5</b> |
| TMEM150A | 0,955566  | -0,479938 | <b>0,237814</b>  | 1494 | 2254 | <b>1874</b>   |
| SIAE     | 0,240303  | 0,23551   | <b>0,2379065</b> | 1676 | 1934 | <b>1805</b>   |
| TEAD3    | 1,495465  | -1,019576 | <b>0,2379445</b> | 1355 | 1770 | <b>1562,5</b> |
| PTGR2    | 0,566987  | -0,090584 | <b>0,2382015</b> | 1699 | 2067 | <b>1883</b>   |
| ZNF675   | 0,238232  | NaN       | <b>0,238232</b>  | 1689 | NaN  | <b>1689</b>   |

|            |           |           |                  |      |      |               |
|------------|-----------|-----------|------------------|------|------|---------------|
| DDX23      | -0,06397  | 0,540545  | <b>0,2382875</b> | 1425 | 1920 | <b>1672,5</b> |
| KCNQ4      | -0,136485 | 0,613314  | <b>0,2384145</b> | 1100 | 1949 | <b>1524,5</b> |
| ACAA1      | -0,696845 | 1,173701  | <b>0,238428</b>  | 1415 | 2241 | <b>1828</b>   |
| SPO11      | 0,140048  | 0,336956  | <b>0,238502</b>  | 1894 | 2260 | <b>2077</b>   |
| GBX2       | 0,71253   | -0,235178 | <b>0,238676</b>  | 1664 | 1775 | <b>1719,5</b> |
| IRX6       | -0,375469 | 0,853572  | <b>0,2390515</b> | 1671 | 1911 | <b>1791</b>   |
| IPO13      | 1,191919  | -0,713341 | <b>0,239289</b>  | 1557 | 2066 | <b>1811,5</b> |
| RBM12B     | 1,26729   | -0,788369 | <b>0,2394605</b> | 2081 | 2674 | <b>2377,5</b> |
| C20orf27   | 0,239478  | NaN       | <b>0,239478</b>  | 1316 | NaN  | <b>1316</b>   |
| MYD88      | 0,239516  | NaN       | <b>0,239516</b>  | 1398 | NaN  | <b>1398</b>   |
| SWT1       | 0,239904  | NaN       | <b>0,239904</b>  | 1468 | NaN  | <b>1468</b>   |
| DCLK1      | -0,185319 | 0,66519   | <b>0,2399355</b> | 1105 | 1639 | <b>1372</b>   |
| OAF        | 0,24007   | NaN       | <b>0,24007</b>   | 1479 | NaN  | <b>1479</b>   |
| C6orf124   | 0,478245  | 0,001906  | <b>0,2400755</b> | 1923 | 2173 | <b>2048</b>   |
| CTR9       | 0,418294  | 0,062145  | <b>0,2402195</b> | 1544 | 2185 | <b>1864,5</b> |
| RSG1       | 0,240248  | NaN       | <b>0,240248</b>  | 1539 | NaN  | <b>1539</b>   |
| ST6GALNAC5 | NaN       | 0,24033   | <b>0,24033</b>   | NaN  | 3044 | <b>3044</b>   |
| GPX2       | -0,058265 | 0,539745  | <b>0,24074</b>   | 1452 | 1800 | <b>1626</b>   |
| EIF2B1     | 0,137252  | 0,34433   | <b>0,240791</b>  | 1356 | 2538 | <b>1947</b>   |
| PRKAA2     | -0,044198 | 0,525913  | <b>0,2408575</b> | 1511 | 2174 | <b>1842,5</b> |
| TOM1       | 0,447936  | 0,034061  | <b>0,2409985</b> | 1561 | 2892 | <b>2226,5</b> |
| TRMT5      | 0,241162  | NaN       | <b>0,241162</b>  | 1621 | NaN  | <b>1621</b>   |
| ARMC4      | 0,783395  | -0,30099  | <b>0,2412025</b> | 1790 | 2134 | <b>1962</b>   |
| ACVR2A     | -0,749004 | 1,231533  | <b>0,2412645</b> | 1444 | 1356 | <b>1400</b>   |
| TTYH2      | 0,998073  | -0,515158 | <b>0,2414575</b> | 1301 | 1580 | <b>1440,5</b> |
| C17orf80   | 0,693116  | -0,209289 | <b>0,2419135</b> | 974  | 1474 | <b>1224</b>   |
| CEACAM18   | 0,480532  | 0,003709  | <b>0,2421205</b> | 1247 | 1686 | <b>1466,5</b> |
| TRIM17     | -0,061566 | 0,546087  | <b>0,2422605</b> | 1594 | 2771 | <b>2182,5</b> |
| PAX6       | -0,391612 | 0,876476  | <b>0,242432</b>  | 1741 | 1830 | <b>1785,5</b> |
| COX6B2     | 0,567759  | -0,082874 | <b>0,2424425</b> | 1722 | 2163 | <b>1942,5</b> |
| DSCR10     | 0,242531  | NaN       | <b>0,242531</b>  | 1507 | NaN  | <b>1507</b>   |
| EBNA1BP2   | 0,242569  | NaN       | <b>0,242569</b>  | 1587 | NaN  | <b>1587</b>   |
| YPEL2      | 0,242652  | NaN       | <b>0,242652</b>  | 1347 | NaN  | <b>1347</b>   |
| USP2       | -0,541843 | 1,027217  | <b>0,242687</b>  | 1595 | 1257 | <b>1426</b>   |

|           |           |           |                  |      |      |               |
|-----------|-----------|-----------|------------------|------|------|---------------|
| DHRS7     | -0,076398 | 0,562071  | <b>0,2428365</b> | 2136 | 2169 | <b>2152,5</b> |
| WDR26     | -0,01527  | 0,500955  | <b>0,2428425</b> | 1936 | 1607 | <b>1771,5</b> |
| VLDLR     | 0,985402  | -0,49949  | <b>0,242956</b>  | 1572 | 2192 | <b>1882</b>   |
| PCDHB13   | 0,319507  | 0,166764  | <b>0,2431355</b> | 1812 | 2137 | <b>1974,5</b> |
| SFXN4     | 0,216466  | 0,269922  | <b>0,243194</b>  | 1441 | 1722 | <b>1581,5</b> |
| ARL11     | 0,243425  | NaN       | <b>0,243425</b>  | 1493 | NaN  | <b>1493</b>   |
| PRNP      | 0,24358   | NaN       | <b>0,24358</b>   | 735  | NaN  | <b>735</b>    |
| EFNA4     | -0,209732 | 0,697038  | <b>0,243653</b>  | 1382 | 1799 | <b>1590,5</b> |
| NEURL     | 0,486058  | 0,002039  | <b>0,2440485</b> | 877  | 1530 | <b>1203,5</b> |
| HADHA     | -0,283259 | 0,771395  | <b>0,244068</b>  | 1629 | 2319 | <b>1974</b>   |
| OR2A2     | 0,244631  | NaN       | <b>0,244631</b>  | 1862 | NaN  | <b>1862</b>   |
| MGAT1     | 0,232879  | 0,256638  | <b>0,2447585</b> | 1915 | 2012 | <b>1963,5</b> |
| EEPD1     | 0,923965  | -0,434301 | <b>0,244832</b>  | 1207 | 1630 | <b>1418,5</b> |
| PROCA1    | 0,223465  | 0,266352  | <b>0,2449085</b> | 2099 | 2222 | <b>2160,5</b> |
| VT11A     | 0,56518   | -0,074996 | <b>0,245092</b>  | 1867 | 2161 | <b>2014</b>   |
| BPIFA1    | 1,196653  | -0,706104 | <b>0,2452745</b> | 1585 | 2159 | <b>1872</b>   |
| RCAN1     | 0,780763  | -0,289996 | <b>0,2453835</b> | 1822 | 2223 | <b>2022,5</b> |
| GUCY1B3   | 0,206906  | 0,283886  | <b>0,245396</b>  | 1529 | 1262 | <b>1395,5</b> |
| ZNF532    | 1,028331  | -0,537164 | <b>0,2455835</b> | 1805 | 1845 | <b>1825</b>   |
| C17orf42  | -0,014672 | 0,506459  | <b>0,2458935</b> | 1712 | 2673 | <b>2192,5</b> |
| HIST1H1E  | 0,245924  | NaN       | <b>0,245924</b>  | 2163 | NaN  | <b>2163</b>   |
| DNAJC5B   | 0,017249  | 0,474656  | <b>0,2459525</b> | 1308 | 2008 | <b>1658</b>   |
| FUT3      | -0,319296 | 0,811364  | <b>0,246034</b>  | 1954 | 1991 | <b>1972,5</b> |
| RIT1      | 0,192144  | 0,300594  | <b>0,246369</b>  | 1866 | 1799 | <b>1832,5</b> |
| DENND2A   | 0,246641  | NaN       | <b>0,246641</b>  | 1944 | NaN  | <b>1944</b>   |
| SHANK1    | 0,030429  | 0,463089  | <b>0,246759</b>  | 1678 | 1582 | <b>1630</b>   |
| FAM63B    | 0,927811  | -0,433412 | <b>0,2471995</b> | 1632 | 2015 | <b>1823,5</b> |
| PIK3IP1   | 0,247238  | NaN       | <b>0,247238</b>  | 1754 | NaN  | <b>1754</b>   |
| RNF38     | 0,372398  | 0,12208   | <b>0,247239</b>  | 1209 | 1930 | <b>1569,5</b> |
| KIAA1324L | 0,247263  | NaN       | <b>0,247263</b>  | 1542 | NaN  | <b>1542</b>   |
| PRMT1     | -0,19713  | 0,691657  | <b>0,2472635</b> | 2047 | 2295 | <b>2171</b>   |
| ALPK2     | -0,040951 | 0,535642  | <b>0,2473455</b> | 1490 | 2338 | <b>1914</b>   |
| LRRC41    | 0,247353  | NaN       | <b>0,247353</b>  | 1625 | NaN  | <b>1625</b>   |
| ATP2C2    | 0,009002  | 0,485727  | <b>0,2473645</b> | 2037 | 2268 | <b>2152,5</b> |



|              |           |           |                  |      |      |               |
|--------------|-----------|-----------|------------------|------|------|---------------|
| CCDC77       | 0,247383  | NaN       | <b>0,247383</b>  | 1867 | NaN  | <b>1867</b>   |
| BLZF1        | 0,249245  | 0,24614   | <b>0,2476925</b> | 1439 | 2056 | <b>1747,5</b> |
| CST7         | 0,653972  | -0,158507 | <b>0,2477325</b> | 1221 | 1625 | <b>1423</b>   |
| DYNC1H1      | 0,862075  | -0,365862 | <b>0,2481065</b> | 1255 | 1583 | <b>1419</b>   |
| MRPL43       | -0,986763 | 1,483582  | <b>0,2484095</b> | 1463 | 1931 | <b>1697</b>   |
| C1orf146     | -0,68962  | 1,186719  | <b>0,2485495</b> | 1475 | 1813 | <b>1644</b>   |
| ATF5         | 0,034409  | 0,462948  | <b>0,2486785</b> | 1217 | 1935 | <b>1576</b>   |
| KLHL36       | -0,337979 | 0,835997  | <b>0,249009</b>  | 1717 | 1854 | <b>1785,5</b> |
| NDUFB9       | NaN       | 0,249404  | <b>0,249404</b>  | NaN  | 2582 | <b>2582</b>   |
| SIRT1        | 0,189453  | 0,309589  | <b>0,249521</b>  | 1461 | 2151 | <b>1806</b>   |
| GSPT2        | 0,022015  | 0,477491  | <b>0,249753</b>  | 1700 | 2396 | <b>2048</b>   |
| HIP1         | 0,244065  | 0,255575  | <b>0,24982</b>   | 2145 | 2582 | <b>2363,5</b> |
| CCDC47       | 0,250031  | NaN       | <b>0,250031</b>  | 1269 | NaN  | <b>1269</b>   |
| GLTSCR2      | 0,172566  | 0,327799  | <b>0,2501825</b> | 1659 | 2254 | <b>1956,5</b> |
| C6orf10      | -0,55669  | 1,057154  | <b>0,250232</b>  | 2409 | 2089 | <b>2249</b>   |
| SLC22A17     | 0,148941  | 0,352024  | <b>0,2504825</b> | 1824 | 2525 | <b>2174,5</b> |
| PLAT         | 0,654458  | -0,153384 | <b>0,250537</b>  | 1554 | 2127 | <b>1840,5</b> |
| CYP3A43      | 0,176976  | 0,324338  | <b>0,250657</b>  | 1091 | 1337 | <b>1214</b>   |
| HMGB3        | 1,267802  | -0,766417 | <b>0,2506925</b> | 2050 | 2167 | <b>2108,5</b> |
| SLC9A9       | 0,099649  | 0,402078  | <b>0,2508635</b> | 1751 | 2270 | <b>2010,5</b> |
| ZFYVE16      | 0,314362  | 0,187817  | <b>0,2510895</b> | 1697 | 1170 | <b>1433,5</b> |
| EMR2         | 0,251333  | NaN       | <b>0,251333</b>  | 1346 | NaN  | <b>1346</b>   |
| MMP2         | 0,250896  | 0,251899  | <b>0,2513975</b> | 1279 | 1982 | <b>1630,5</b> |
| MRC2         | 0,888797  | -0,385916 | <b>0,2514405</b> | 1421 | 2315 | <b>1868</b>   |
| ANGPTL3      | -0,686594 | 1,189739  | <b>0,2515725</b> | 1592 | 1351 | <b>1471,5</b> |
| PHF13        | 0,218309  | 0,285242  | <b>0,2517755</b> | 1778 | 2734 | <b>2256</b>   |
| SLC35F2      | 0,479459  | 0,024315  | <b>0,251887</b>  | 2029 | 2142 | <b>2085,5</b> |
| S100B        | 0,019801  | 0,48418   | <b>0,2519905</b> | 2015 | 2462 | <b>2238,5</b> |
| SYMPK        | 0,32702   | 0,177004  | <b>0,252012</b>  | 1588 | 2161 | <b>1874,5</b> |
| KCTD10       | 0,718919  | -0,214829 | <b>0,252045</b>  | 997  | 1688 | <b>1342,5</b> |
| TGDS         | 0,344775  | 0,159464  | <b>0,2521195</b> | 1374 | 2110 | <b>1742</b>   |
| CLECL1       | -0,104519 | 0,609092  | <b>0,2522865</b> | 2007 | 2118 | <b>2062,5</b> |
| ZNF576       | 1,007485  | -0,502825 | <b>0,25233</b>   | 1544 | 1580 | <b>1562</b>   |
| C17orf76-AS1 | 0,252358  | NaN       | <b>0,252358</b>  | 1709 | NaN  | <b>1709</b>   |

|         |           |           |                  |      |      |               |
|---------|-----------|-----------|------------------|------|------|---------------|
| LIPH    | -0,159697 | 0,664561  | <b>0,252432</b>  | 1771 | 1886 | <b>1828,5</b> |
| CLNK    | 0,252509  | NaN       | <b>0,252509</b>  | 1764 | NaN  | <b>1764</b>   |
| HTR5A   | 0,253217  | NaN       | <b>0,253217</b>  | 1186 | NaN  | <b>1186</b>   |
| PIBF1   | 0,199425  | 0,307238  | <b>0,2533315</b> | 2026 | 2931 | <b>2478,5</b> |
| MYL12B  | 0,253396  | NaN       | <b>0,253396</b>  | 1206 | NaN  | <b>1206</b>   |
| ATP4A   | -0,162212 | 0,6691    | <b>0,253444</b>  | 1708 | 3101 | <b>2404,5</b> |
| MTMR2   | -0,140189 | 0,64712   | <b>0,2534655</b> | 1699 | 2391 | <b>2045</b>   |
| SCN4A   | 0,158227  | 0,348808  | <b>0,2535175</b> | 1532 | 1878 | <b>1705</b>   |
| DGUOK   | 0,401872  | 0,106119  | <b>0,2539955</b> | 1295 | 1762 | <b>1528,5</b> |
| RINT1   | 0,551967  | -0,04381  | <b>0,2540785</b> | 1737 | 2113 | <b>1925</b>   |
| TMEM14A | 0,665991  | -0,157758 | <b>0,2541165</b> | 1913 | 1950 | <b>1931,5</b> |
| OR4C45  | 0,254507  | NaN       | <b>0,254507</b>  | 1728 | NaN  | <b>1728</b>   |
| PDYN    | 0,294464  | 0,214701  | <b>0,2545825</b> | 1868 | 2179 | <b>2023,5</b> |
| TGM6    | 0,450724  | 0,058908  | <b>0,254816</b>  | 1030 | 1520 | <b>1275</b>   |
| RAD51   | 0,102718  | 0,406967  | <b>0,2548425</b> | 1147 | 1250 | <b>1198,5</b> |
| UBE2L3  | -0,309062 | 0,819067  | <b>0,2550025</b> | 877  | 2019 | <b>1448</b>   |
| BMP3    | 1,221734  | -0,711178 | <b>0,255278</b>  | 404  | 1104 | <b>754</b>    |
| COL4A3  | -0,229529 | 0,740473  | <b>0,255472</b>  | 1853 | 2363 | <b>2108</b>   |
| NME3    | 0,332043  | 0,178919  | <b>0,255481</b>  | 1516 | 1396 | <b>1456</b>   |
| SEMA4D  | 0,704382  | -0,19334  | <b>0,255521</b>  | 1795 | 2011 | <b>1903</b>   |
| OR6C74  | 0,25558   | NaN       | <b>0,25558</b>   | 1750 | NaN  | <b>1750</b>   |
| HAPLN1  | 0,118857  | 0,392498  | <b>0,2556775</b> | 1677 | 2369 | <b>2023</b>   |
| ASAP3   | 0,255736  | NaN       | <b>0,255736</b>  | 1376 | NaN  | <b>1376</b>   |
| NPRL2   | 0,043618  | 0,468568  | <b>0,256093</b>  | 1320 | 1723 | <b>1521,5</b> |
| SYNPO2L | 0,179004  | 0,33329   | <b>0,256147</b>  | 1883 | 2314 | <b>2098,5</b> |
| DKK2    | 0,366919  | 0,14572   | <b>0,2563195</b> | 1704 | 2825 | <b>2264,5</b> |
| EBPL    | 0,047549  | 0,465463  | <b>0,256506</b>  | 1643 | 1741 | <b>1692</b>   |
| OSM     | 0,412725  | 0,100367  | <b>0,256546</b>  | 1716 | 2257 | <b>1986,5</b> |
| ADRBK2  | 0,296519  | 0,216619  | <b>0,256569</b>  | 1703 | 2241 | <b>1972</b>   |
| WFDC8   | 0,237914  | 0,275464  | <b>0,256689</b>  | 2084 | 2025 | <b>2054,5</b> |
| ONECUT1 | 0,698787  | -0,185332 | <b>0,2567275</b> | 1348 | 2010 | <b>1679</b>   |
| CAMSAP1 | 0,35466   | 0,158802  | <b>0,256731</b>  | 1444 | 3138 | <b>2291</b>   |
| POU1F1  | 0,262687  | 0,250815  | <b>0,256751</b>  | 2010 | 1702 | <b>1856</b>   |
| KLK1    | -0,124316 | 0,63811   | <b>0,256897</b>  | 1418 | 2232 | <b>1825</b>   |

|         |           |           |                  |      |      |               |
|---------|-----------|-----------|------------------|------|------|---------------|
| LMLN    | -0,95134  | 1,46582   | <b>0,25724</b>   | 1694 | 1652 | <b>1673</b>   |
| CCDC135 | -0,763663 | 1,278246  | <b>0,2572915</b> | 1106 | 1509 | <b>1307,5</b> |
| GEMIN6  | 0,499905  | 0,014807  | <b>0,257356</b>  | 1795 | 2776 | <b>2285,5</b> |
| NR3C2   | 0,11962   | 0,395414  | <b>0,257517</b>  | 1789 | 2209 | <b>1999</b>   |
| ORC4    | 0,855591  | -0,340502 | <b>0,2575445</b> | 2078 | 2312 | <b>2195</b>   |
| NEBL    | 0,259011  | 0,256258  | <b>0,2576345</b> | 1552 | 1866 | <b>1709</b>   |
| LEFTY1  | 0,285225  | 0,230671  | <b>0,257948</b>  | 2053 | 2906 | <b>2479,5</b> |
| ASGR1   | 0,882865  | -0,366826 | <b>0,2580195</b> | 740  | 923  | <b>831,5</b>  |
| SLITRK2 | 0,461423  | 0,055176  | <b>0,2582995</b> | 1864 | 1509 | <b>1686,5</b> |
| MRAS    | 0,686754  | -0,169801 | <b>0,2584765</b> | 2000 | 2311 | <b>2155,5</b> |
| PSMD9   | 0,440992  | 0,076593  | <b>0,2587925</b> | 1339 | 2321 | <b>1830</b>   |
| C12orf4 | 0,603792  | -0,085992 | <b>0,2589</b>    | 1834 | 1938 | <b>1886</b>   |
| TRIM67  | 0,223629  | 0,294616  | <b>0,2591225</b> | 1482 | 2679 | <b>2080,5</b> |
| C2orf63 | 0,377309  | 0,141208  | <b>0,2592585</b> | 1776 | 1775 | <b>1775,5</b> |
| USP6    | 0,539309  | -0,020742 | <b>0,2592835</b> | 1340 | 1576 | <b>1458</b>   |
| CBLC    | -0,692503 | 1,211191  | <b>0,259344</b>  | 1634 | 1902 | <b>1768</b>   |
| RDM1    | 0,140841  | 0,378228  | <b>0,2595345</b> | 1669 | 2164 | <b>1916,5</b> |
| SCAF11  | 0,36528   | 0,15392   | <b>0,2596</b>    | 1531 | 2076 | <b>1803,5</b> |
| GALNT1  | 0,596072  | -0,076728 | <b>0,259672</b>  | 1693 | 1507 | <b>1600</b>   |
| LGALS3  | 0,632659  | -0,113289 | <b>0,259685</b>  | 2025 | 2302 | <b>2163,5</b> |
| NAT2    | -0,262338 | 0,781858  | <b>0,25976</b>   | 1300 | 1618 | <b>1459</b>   |
| SLC35F5 | 0,345747  | 0,173956  | <b>0,2598515</b> | 1736 | 1908 | <b>1822</b>   |
| KLF5    | -0,131249 | 0,651358  | <b>0,2600545</b> | 2161 | 2597 | <b>2379</b>   |
| SEH1L   | 0,625848  | -0,105602 | <b>0,260123</b>  | 1363 | 1435 | <b>1399</b>   |
| SQSTM1  | 0,351064  | 0,169495  | <b>0,2602795</b> | 1480 | 1742 | <b>1611</b>   |
| GOT1    | 0,461334  | 0,05929   | <b>0,260312</b>  | 1613 | 1916 | <b>1764,5</b> |
| PLEKHM1 | 0,260339  | NaN       | <b>0,260339</b>  | 1138 | NaN  | <b>1138</b>   |
| SERINC1 | 0,400538  | 0,120198  | <b>0,260368</b>  | 1588 | 1645 | <b>1616,5</b> |
| RNF40   | 0,582192  | -0,060668 | <b>0,260762</b>  | 1578 | 2906 | <b>2242</b>   |
| MANSC1  | 0,123992  | 0,397605  | <b>0,2607985</b> | 1585 | 1991 | <b>1788</b>   |
| TMEM81  | 0,261009  | NaN       | <b>0,261009</b>  | 1516 | NaN  | <b>1516</b>   |
| SBK1    | 1,755165  | -1,232753 | <b>0,261206</b>  | 1463 | 1427 | <b>1445</b>   |
| SULT6B1 | 0,030737  | 0,491686  | <b>0,2612115</b> | 1405 | 1666 | <b>1535,5</b> |
| RTTN    | -0,073269 | 0,595733  | <b>0,261232</b>  | 1569 | 2932 | <b>2250,5</b> |

|         |           |           |                  |      |      |               |
|---------|-----------|-----------|------------------|------|------|---------------|
| POU2F1  | 0,513134  | 0,009667  | <b>0,2614005</b> | 1641 | 2289 | <b>1965</b>   |
| LYRM1   | 1,030093  | -0,507046 | <b>0,2615235</b> | 1455 | 1668 | <b>1561,5</b> |
| NKD2    | 0,804356  | -0,280655 | <b>0,2618505</b> | 1201 | 1837 | <b>1519</b>   |
| RBM19   | 0,519022  | 0,004975  | <b>0,2619985</b> | 1681 | 1945 | <b>1813</b>   |
| IRS4    | -0,113113 | 0,637171  | <b>0,262029</b>  | 1246 | 1676 | <b>1461</b>   |
| TMPRSS2 | 0,471082  | 0,053192  | <b>0,262137</b>  | 1271 | 1706 | <b>1488,5</b> |
| OR1M1   | 0,262177  | NaN       | <b>0,262177</b>  | 1582 | NaN  | <b>1582</b>   |
| LDB2    | 0,620722  | -0,095571 | <b>0,2625755</b> | 865  | 1677 | <b>1271</b>   |
| SPRED2  | -0,25616  | 0,781798  | <b>0,262819</b>  | 2003 | 2294 | <b>2148,5</b> |
| MED26   | 0,464832  | 0,061034  | <b>0,262933</b>  | 1354 | 2615 | <b>1984,5</b> |
| PCF11   | -0,123427 | 0,649508  | <b>0,2630405</b> | 1007 | 1409 | <b>1208</b>   |
| JUP     | 0,663315  | -0,136639 | <b>0,263338</b>  | 1495 | 1672 | <b>1583,5</b> |
| C4BPA   | 0,019029  | 0,507673  | <b>0,263351</b>  | 1625 | 1273 | <b>1449</b>   |
| CD109   | 0,489226  | 0,037683  | <b>0,2634545</b> | 1516 | 2106 | <b>1811</b>   |
| NLRC4   | 0,217148  | 0,309814  | <b>0,263481</b>  | 1966 | 2072 | <b>2019</b>   |
| ADRB1   | 0,263987  | NaN       | <b>0,263987</b>  | 1422 | NaN  | <b>1422</b>   |
| IMMP2L  | 0,522263  | 0,00634   | <b>0,2643015</b> | 1937 | 1745 | <b>1841</b>   |
| NFAM1   | 0,264797  | NaN       | <b>0,264797</b>  | 1072 | NaN  | <b>1072</b>   |
| BCORL1  | 0,264942  | NaN       | <b>0,264942</b>  | 1348 | NaN  | <b>1348</b>   |
| C5orf25 | 0,265033  | NaN       | <b>0,265033</b>  | 1208 | NaN  | <b>1208</b>   |
| EHF     | -0,289184 | 0,819386  | <b>0,265101</b>  | 1541 | 2200 | <b>1870,5</b> |
| PDDC1   | -0,159953 | 0,690565  | <b>0,265306</b>  | 1798 | 2725 | <b>2261,5</b> |
| CENPB   | 0,148179  | 0,382587  | <b>0,265383</b>  | 1452 | 1988 | <b>1720</b>   |
| ITGA1   | 0,572056  | -0,040936 | <b>0,26556</b>   | 1388 | 2444 | <b>1916</b>   |
| KCTD9   | 0,26557   | NaN       | <b>0,26557</b>   | 2078 | NaN  | <b>2078</b>   |
| JPH2    | -0,331336 | 0,863498  | <b>0,266081</b>  | 1644 | 1973 | <b>1808,5</b> |
| PCNXL2  | -0,129143 | 0,661603  | <b>0,26623</b>   | 1495 | 2471 | <b>1983</b>   |
| ZNF507  | -0,480664 | 1,01334   | <b>0,266338</b>  | 1409 | 1869 | <b>1639</b>   |
| DFFB    | 1,262392  | -0,729684 | <b>0,266354</b>  | 2092 | 2055 | <b>2073,5</b> |
| NUDT11  | 0,442695  | 0,090019  | <b>0,266357</b>  | 2048 | 2212 | <b>2130</b>   |
| GSG1    | 0,66344   | -0,130622 | <b>0,266409</b>  | 1558 | 2206 | <b>1882</b>   |
| ARID4B  | 0,881597  | -0,348493 | <b>0,266552</b>  | 2113 | 2413 | <b>2263</b>   |
| ZNF414  | -0,851632 | 1,384766  | <b>0,266567</b>  | 1389 | 1790 | <b>1589,5</b> |
| BHMT2   | -0,342274 | 0,875421  | <b>0,2665735</b> | 1685 | 2115 | <b>1900</b>   |

|          |           |           |                  |      |      |               |
|----------|-----------|-----------|------------------|------|------|---------------|
| AP1M2    | 0,768163  | -0,234523 | <b>0,26682</b>   | 1621 | 2246 | <b>1933,5</b> |
| C7orf54  | 0,267041  | NaN       | <b>0,267041</b>  | 1457 | NaN  | <b>1457</b>   |
| CXCL3    | 0,487649  | 0,047522  | <b>0,2675855</b> | 2261 | 1863 | <b>2062</b>   |
| PPP1R16B | 0,450627  | 0,084795  | <b>0,267711</b>  | 1990 | 2218 | <b>2104</b>   |
| KDM2A    | 0,267851  | 0,268417  | <b>0,268134</b>  | 1803 | 2630 | <b>2216,5</b> |
| FEM1B    | 0,775855  | -0,239517 | <b>0,268169</b>  | 1409 | 1822 | <b>1615,5</b> |
| NUP155   | 0,724718  | -0,188293 | <b>0,2682125</b> | 1843 | 2512 | <b>2177,5</b> |
| BUD13    | 0,268224  | NaN       | <b>0,268224</b>  | 1276 | NaN  | <b>1276</b>   |
| ADIG     | -0,080783 | 0,617245  | <b>0,268231</b>  | 1383 | 2155 | <b>1769</b>   |
| ALDH1L1  | 0,327528  | 0,209054  | <b>0,268291</b>  | 1778 | 1941 | <b>1859,5</b> |
| KCNH2    | 0,75663   | -0,219991 | <b>0,2683195</b> | 1273 | 1972 | <b>1622,5</b> |
| TMEM74   | 0,367896  | 0,168811  | <b>0,2683535</b> | 1634 | 2004 | <b>1819</b>   |
| RBM7     | 0,483377  | 0,053591  | <b>0,268484</b>  | 1711 | 2226 | <b>1968,5</b> |
| RWDD4    | -0,637786 | 1,17534   | <b>0,268777</b>  | 2162 | 2399 | <b>2280,5</b> |
| IZUMO1   | 0,386119  | 0,151464  | <b>0,2687915</b> | 2060 | 2957 | <b>2508,5</b> |
| BEST4    | 0,268802  | NaN       | <b>0,268802</b>  | 1415 | NaN  | <b>1415</b>   |
| GMPR     | 1,360168  | -0,822351 | <b>0,2689085</b> | 1857 | 2075 | <b>1966</b>   |
| METTL16  | 0,269026  | NaN       | <b>0,269026</b>  | 1546 | NaN  | <b>1546</b>   |
| GRAP2    | 0,601789  | -0,063529 | <b>0,26913</b>   | 1896 | 2323 | <b>2109,5</b> |
| CDHR2    | 0,340612  | 0,197901  | <b>0,2692565</b> | 1727 | 2201 | <b>1964</b>   |
| HRSP12   | -0,333659 | 0,872679  | <b>0,26951</b>   | 1838 | 2077 | <b>1957,5</b> |
| PDGFRB   | 0,124671  | 0,414745  | <b>0,269708</b>  | 1700 | 1702 | <b>1701</b>   |
| CCNA1    | 0,490457  | 0,048993  | <b>0,269725</b>  | 1586 | 1583 | <b>1584,5</b> |
| TMEM203  | 0,270124  | NaN       | <b>0,270124</b>  | 1560 | NaN  | <b>1560</b>   |
| UTRN     | 0,197459  | 0,343042  | <b>0,2702505</b> | 815  | 1209 | <b>1012</b>   |
| DEFB127  | 0,339187  | 0,201458  | <b>0,2703225</b> | 1767 | 1962 | <b>1864,5</b> |
| PIDD     | 0,270408  | NaN       | <b>0,270408</b>  | 1125 | NaN  | <b>1125</b>   |
| PDPK1    | 0,612667  | -0,071831 | <b>0,270418</b>  | 1549 | 2186 | <b>1867,5</b> |
| PAQR8    | 0,270555  | NaN       | <b>0,270555</b>  | 1709 | NaN  | <b>1709</b>   |
| TTC33    | 0,270865  | NaN       | <b>0,270865</b>  | 1991 | NaN  | <b>1991</b>   |
| TM6SF2   | 0,270926  | NaN       | <b>0,270926</b>  | 1394 | NaN  | <b>1394</b>   |
| CLDN19   | 0,253786  | 0,288113  | <b>0,2709495</b> | 1735 | 2728 | <b>2231,5</b> |
| SCPEP1   | 0,359016  | 0,183254  | <b>0,271135</b>  | 1231 | 1698 | <b>1464,5</b> |
| ACSL3    | 0,364094  | 0,178898  | <b>0,271496</b>  | 1275 | 2026 | <b>1650,5</b> |

|          |           |           |                  |      |      |               |
|----------|-----------|-----------|------------------|------|------|---------------|
| CCDC51   | 0,27161   | NaN       | <b>0,27161</b>   | 1632 | NaN  | <b>1632</b>   |
| TC2N     | 0,33563   | 0,208244  | <b>0,271937</b>  | 1729 | 1688 | <b>1708,5</b> |
| ANP32D   | 0,550505  | -0,005946 | <b>0,2722795</b> | 1504 | 1636 | <b>1570</b>   |
| PARP2    | 0,426867  | 0,118141  | <b>0,272504</b>  | 1536 | 2201 | <b>1868,5</b> |
| CYB561   | -0,174938 | 0,720878  | <b>0,27297</b>   | 1257 | 1777 | <b>1517</b>   |
| ARHGEF25 | 0,630217  | -0,084026 | <b>0,2730955</b> | 1643 | 1947 | <b>1795</b>   |
| REN      | -0,071848 | 0,618276  | <b>0,273214</b>  | 2190 | 2533 | <b>2361,5</b> |
| CEP128   | 0,303527  | 0,24307   | <b>0,2732985</b> | 1651 | 2016 | <b>1833,5</b> |
| SPTBN2   | 0,163567  | 0,383073  | <b>0,27332</b>   | 2072 | 1964 | <b>2018</b>   |
| IFI44    | 0,235875  | 0,310871  | <b>0,273373</b>  | 1776 | 1971 | <b>1873,5</b> |
| MAGEA10  | -0,319978 | 0,867424  | <b>0,273723</b>  | 1654 | 2097 | <b>1875,5</b> |
| CFL1     | -0,132131 | 0,680081  | <b>0,273975</b>  | 1606 | 1680 | <b>1643</b>   |
| SCUBE1   | 0,274548  | NaN       | <b>0,274548</b>  | 1233 | NaN  | <b>1233</b>   |
| SLC26A9  | 0,600352  | -0,051098 | <b>0,274627</b>  | 1249 | 2169 | <b>1709</b>   |
| TIRAP    | 0,27468   | NaN       | <b>0,27468</b>   | 1665 | NaN  | <b>1665</b>   |
| MSRB2    | -0,201532 | 0,750978  | <b>0,274723</b>  | 1692 | 2387 | <b>2039,5</b> |
| GIP      | 0,274853  | NaN       | <b>0,274853</b>  | 1526 | NaN  | <b>1526</b>   |
| SIPA1    | 0,628312  | -0,078384 | <b>0,274964</b>  | 1408 | 1721 | <b>1564,5</b> |
| ETV3L    | 0,364972  | 0,186323  | <b>0,2756475</b> | 1428 | 2085 | <b>1756,5</b> |
| ATP10D   | 0,253878  | 0,297429  | <b>0,2756535</b> | 1500 | 2111 | <b>1805,5</b> |
| SP110    | 0,15884   | 0,392845  | <b>0,2758425</b> | 1510 | 2285 | <b>1897,5</b> |
| NSUN5    | NaN       | 0,275933  | <b>0,275933</b>  | NaN  | 3176 | <b>3176</b>   |
| LYPD3    | 0,013126  | 0,53906   | <b>0,276093</b>  | 1959 | 2332 | <b>2145,5</b> |
| STX12    | 1,186578  | -0,634078 | <b>0,27625</b>   | 1465 | 1916 | <b>1690,5</b> |
| CHN2     | 0,076539  | 0,476101  | <b>0,27632</b>   | 1467 | 2256 | <b>1861,5</b> |
| PTPRF    | 0,965688  | -0,413011 | <b>0,2763385</b> | 1423 | 2149 | <b>1786</b>   |
| OR52A5   | 0,276613  | NaN       | <b>0,276613</b>  | 1376 | NaN  | <b>1376</b>   |
| VOPP1    | 0,276616  | NaN       | <b>0,276616</b>  | 1693 | NaN  | <b>1693</b>   |
| DAAM2    | 0,285296  | 0,268231  | <b>0,2767635</b> | 1484 | 2322 | <b>1903</b>   |
| RCN2     | 0,730345  | -0,176589 | <b>0,276878</b>  | 1224 | 1972 | <b>1598</b>   |
| C5orf62  | 0,451497  | 0,102668  | <b>0,2770825</b> | 1488 | 2669 | <b>2078,5</b> |
| WFDC5    | 0,277248  | NaN       | <b>0,277248</b>  | 1389 | NaN  | <b>1389</b>   |
| GTF2B    | 0,671141  | -0,116068 | <b>0,2775365</b> | 1589 | 2241 | <b>1915</b>   |
| SLC6A6   | 0,537823  | 0,017331  | <b>0,277577</b>  | 1352 | 2013 | <b>1682,5</b> |

|          |           |           |                  |      |      |               |
|----------|-----------|-----------|------------------|------|------|---------------|
| ELAC1    | -0,087558 | 0,643498  | <b>0,27797</b>   | 1496 | 1801 | <b>1648,5</b> |
| TET1     | 0,581082  | -0,025079 | <b>0,2780015</b> | 1809 | 1614 | <b>1711,5</b> |
| SLC44A3  | 0,774436  | -0,217926 | <b>0,278255</b>  | 1609 | 1704 | <b>1656,5</b> |
| BTBD3    | 0,835613  | -0,278979 | <b>0,278317</b>  | 1656 | 2780 | <b>2218</b>   |
| DTL      | 0,559837  | -0,003056 | <b>0,2783905</b> | 669  | 808  | <b>738,5</b>  |
| MCU      | 0,141422  | 0,415676  | <b>0,278549</b>  | 2031 | 2247 | <b>2139</b>   |
| MBOAT2   | 0,278587  | NaN       | <b>0,278587</b>  | 2079 | NaN  | <b>2079</b>   |
| SLC25A17 | 0,625697  | -0,068421 | <b>0,278638</b>  | 1759 | 2060 | <b>1909,5</b> |
| UPP1     | 0,331113  | 0,226587  | <b>0,27885</b>   | 1722 | 2328 | <b>2025</b>   |
| GTPBP1   | 0,174148  | 0,383589  | <b>0,2788685</b> | 591  | 737  | <b>664</b>    |
| CAMK2G   | -0,123595 | 0,681805  | <b>0,279105</b>  | 2148 | 1782 | <b>1965</b>   |
| RAF1     | 0,838784  | -0,280282 | <b>0,279251</b>  | 1462 | 1784 | <b>1623</b>   |
| DOPEY2   | -0,41331  | 0,971858  | <b>0,279274</b>  | 1807 | 2519 | <b>2163</b>   |
| TEX14    | 0,69883   | -0,140269 | <b>0,2792805</b> | 1981 | 2222 | <b>2101,5</b> |
| FCF1     | 1,254381  | -0,695439 | <b>0,279471</b>  | 1292 | 2005 | <b>1648,5</b> |
| RETNLB   | -0,047711 | 0,607034  | <b>0,2796615</b> | 1200 | 920  | <b>1060</b>   |
| CBX4     | 0,303585  | 0,256523  | <b>0,280054</b>  | 1389 | 1893 | <b>1641</b>   |
| ZNF473   | 0,991932  | -0,431681 | <b>0,2801255</b> | 1462 | 1665 | <b>1563,5</b> |
| FABP3    | 0,328611  | 0,231665  | <b>0,280138</b>  | 1982 | 2599 | <b>2290,5</b> |
| MYO3B    | 0,817385  | -0,256225 | <b>0,28058</b>   | 2538 | 2324 | <b>2431</b>   |
| ZMYND12  | -0,208655 | 0,770007  | <b>0,280676</b>  | 1885 | 1854 | <b>1869,5</b> |
| SP2      | 0,596372  | -0,033962 | <b>0,281205</b>  | 1072 | 1348 | <b>1210</b>   |
| PGS1     | -0,340745 | 0,905074  | <b>0,2821645</b> | 1610 | 2755 | <b>2182,5</b> |
| GLRX     | -0,848071 | 1,412566  | <b>0,2822475</b> | 1339 | 1922 | <b>1630,5</b> |
| FAM47B   | 0,227128  | 0,337417  | <b>0,2822725</b> | 1840 | 2307 | <b>2073,5</b> |
| PVRL1    | 0,282297  | NaN       | <b>0,282297</b>  | 1719 | NaN  | <b>1719</b>   |
| TNN      | 0,282357  | NaN       | <b>0,282357</b>  | 1685 | NaN  | <b>1685</b>   |
| IL29     | 0,246993  | 0,317731  | <b>0,282362</b>  | 1715 | 1484 | <b>1599,5</b> |
| SH3PXD2B | 0,282485  | NaN       | <b>0,282485</b>  | 1769 | NaN  | <b>1769</b>   |
| GDAP2    | 0,471743  | 0,093356  | <b>0,2825495</b> | 1306 | 1601 | <b>1453,5</b> |
| RC3H2    | 0,25123   | 0,314004  | <b>0,282617</b>  | 1588 | 2084 | <b>1836</b>   |
| LG12     | 0,279907  | 0,285734  | <b>0,2828205</b> | 1237 | 2137 | <b>1687</b>   |
| WIBG     | 0,282997  | NaN       | <b>0,282997</b>  | 1817 | NaN  | <b>1817</b>   |
| RAB7L1   | -1,090626 | 1,656725  | <b>0,2830495</b> | 1706 | 1786 | <b>1746</b>   |

|          |           |           |                  |      |      |               |
|----------|-----------|-----------|------------------|------|------|---------------|
| TTYH3    | -0,055776 | 0,622013  | <b>0,2831185</b> | 1461 | 1869 | <b>1665</b>   |
| TBK1     | 0,402105  | 0,164488  | <b>0,2832965</b> | 1835 | 1342 | <b>1588,5</b> |
| NFKBIZ   | 0,565456  | 0,001474  | <b>0,283465</b>  | 1578 | 1863 | <b>1720,5</b> |
| WDR67    | 0,2838    | NaN       | <b>0,2838</b>    | 1971 | NaN  | <b>1971</b>   |
| IDH3B    | 0,322449  | 0,245358  | <b>0,2839035</b> | 1385 | 2060 | <b>1722,5</b> |
| EGFL6    | 0,284199  | NaN       | <b>0,284199</b>  | 1705 | NaN  | <b>1705</b>   |
| PCMTD2   | 0,733353  | -0,164705 | <b>0,284324</b>  | 1702 | 2589 | <b>2145,5</b> |
| FSTL3    | 0,137723  | 0,431432  | <b>0,2845775</b> | 622  | 1314 | <b>968</b>    |
| LRRC66   | 0,650513  | -0,081003 | <b>0,284755</b>  | 1637 | 2090 | <b>1863,5</b> |
| MSX1     | -0,052505 | 0,622074  | <b>0,2847845</b> | 1107 | 2232 | <b>1669,5</b> |
| TNNI3    | -0,095189 | 0,665256  | <b>0,2850335</b> | 923  | 2053 | <b>1488</b>   |
| CHD3     | 0,134609  | 0,435572  | <b>0,2850905</b> | 1939 | 1767 | <b>1853</b>   |
| ALLC     | -0,300878 | 0,87153   | <b>0,285326</b>  | 1607 | 1952 | <b>1779,5</b> |
| THAP7    | 0,2096    | 0,361301  | <b>0,2854505</b> | 1768 | 1566 | <b>1667</b>   |
| TTC38    | 0,285637  | NaN       | <b>0,285637</b>  | 1432 | NaN  | <b>1432</b>   |
| SSB      | 0,440882  | 0,130963  | <b>0,2859225</b> | 1666 | 2254 | <b>1960</b>   |
| ARHGAP25 | 0,452313  | 0,120791  | <b>0,286552</b>  | 2107 | 2245 | <b>2176</b>   |
| PAK1IP1  | 0,675114  | -0,101988 | <b>0,286563</b>  | 1519 | 2418 | <b>1968,5</b> |
| KCNV1    | -0,295367 | 0,868531  | <b>0,286582</b>  | 1852 | 1941 | <b>1896,5</b> |
| CNP      | 0,444901  | 0,128693  | <b>0,286797</b>  | 1345 | 1656 | <b>1500,5</b> |
| CCDC62   | 0,286976  | NaN       | <b>0,286976</b>  | 1950 | NaN  | <b>1950</b>   |
| MFSD9    | 0,620734  | -0,046753 | <b>0,2869905</b> | 1736 | 2210 | <b>1973</b>   |
| FOXO1    | 0,554917  | 0,019082  | <b>0,2869995</b> | 2018 | 2323 | <b>2170,5</b> |
| OR13C9   | 0,231354  | 0,343074  | <b>0,287214</b>  | 2018 | 1336 | <b>1677</b>   |
| OLFM3    | 0,343879  | 0,230604  | <b>0,2872415</b> | 1444 | 2294 | <b>1869</b>   |
| CCDC33   | 1,061313  | -0,486753 | <b>0,28728</b>   | 1299 | 2285 | <b>1792</b>   |
| GGTLC1   | -0,253606 | 0,8285    | <b>0,287447</b>  | 1542 | 2758 | <b>2150</b>   |
| HIPK1    | 0,451605  | 0,123424  | <b>0,2875145</b> | 1490 | 2022 | <b>1756</b>   |
| KEL      | 0,423103  | 0,152262  | <b>0,2876825</b> | 1711 | 2121 | <b>1916</b>   |
| NKD1     | 0,25054   | 0,325295  | <b>0,2879175</b> | 1117 | 1719 | <b>1418</b>   |
| VSIG10   | 0,277502  | 0,298451  | <b>0,2879765</b> | 1606 | 2000 | <b>1803</b>   |
| FAM172A  | 0,415759  | 0,160285  | <b>0,288022</b>  | 1408 | 1679 | <b>1543,5</b> |
| GNAL     | 0,508158  | 0,068106  | <b>0,288132</b>  | 1306 | 1385 | <b>1345,5</b> |
| C10orf11 | 0,242133  | 0,334161  | <b>0,288147</b>  | 1591 | 1880 | <b>1735,5</b> |



|          |           |           |                  |      |      |               |
|----------|-----------|-----------|------------------|------|------|---------------|
| GPR176   | 0,288405  | NaN       | <b>0,288405</b>  | 1410 | NaN  | <b>1410</b>   |
| FAM136A  | 0,623565  | -0,046588 | <b>0,2884885</b> | 1941 | 2311 | <b>2126</b>   |
| ZNF319   | 0,288587  | NaN       | <b>0,288587</b>  | 1635 | NaN  | <b>1635</b>   |
| BTN3A2   | 0,839466  | -0,26224  | <b>0,288613</b>  | 1566 | 2281 | <b>1923,5</b> |
| BCL11B   | 0,204459  | 0,372795  | <b>0,288627</b>  | 1628 | 2092 | <b>1860</b>   |
| CHST8    | 0,296442  | 0,281055  | <b>0,2887485</b> | 1537 | 1324 | <b>1430,5</b> |
| C6orf62  | 0,305627  | 0,271903  | <b>0,288765</b>  | 1889 | 2317 | <b>2103</b>   |
| FH       | -0,551062 | 1,12862   | <b>0,288779</b>  | 1593 | 1748 | <b>1670,5</b> |
| C19orf63 | 0,858897  | -0,281155 | <b>0,288871</b>  | 1207 | 1808 | <b>1507,5</b> |
| NPHS2    | 0,902006  | -0,32419  | <b>0,288908</b>  | 1177 | 2123 | <b>1650</b>   |
| ARAP2    | -0,080516 | 0,658546  | <b>0,289015</b>  | 1517 | 1782 | <b>1649,5</b> |
| PLEKHF1  | 0,733958  | -0,155181 | <b>0,2893885</b> | 1979 | 2123 | <b>2051</b>   |
| OR2M4    | 0,289647  | NaN       | <b>0,289647</b>  | 1415 | NaN  | <b>1415</b>   |
| MLX      | -0,039065 | 0,618425  | <b>0,28968</b>   | 1623 | 2066 | <b>1844,5</b> |
| MEGF9    | 0,289766  | NaN       | <b>0,289766</b>  | 1445 | NaN  | <b>1445</b>   |
| C1orf65  | 0,28988   | NaN       | <b>0,28988</b>   | 1448 | NaN  | <b>1448</b>   |
| B4GALT5  | -0,285507 | 0,865668  | <b>0,2900805</b> | 1674 | 1503 | <b>1588,5</b> |
| PRKD1    | 0,282515  | 0,297806  | <b>0,2901605</b> | 2378 | 2098 | <b>2238</b>   |
| RNASE8   | 0,198743  | 0,381583  | <b>0,290163</b>  | 1813 | 1897 | <b>1855</b>   |
| RP1      | 0,240374  | 0,340181  | <b>0,2902775</b> | 1870 | 2002 | <b>1936</b>   |
| BGN      | 0,542624  | 0,038031  | <b>0,2903275</b> | 1475 | 2013 | <b>1744</b>   |
| PHF11    | 1,301218  | -0,720357 | <b>0,2904305</b> | 1522 | 2793 | <b>2157,5</b> |
| FLNB     | 0,279658  | 0,302216  | <b>0,290937</b>  | 1619 | 1872 | <b>1745,5</b> |
| GAST     | 0,691035  | -0,10908  | <b>0,2909775</b> | 1578 | 2684 | <b>2131</b>   |
| TBL1Y    | 0,291029  | NaN       | <b>0,291029</b>  | 1431 | NaN  | <b>1431</b>   |
| LRRC48   | 0,302929  | 0,279343  | <b>0,291136</b>  | 1530 | 1626 | <b>1578</b>   |
| GPR124   | 0,291348  | NaN       | <b>0,291348</b>  | 1524 | NaN  | <b>1524</b>   |
| ISG20L2  | 0,276009  | 0,306939  | <b>0,291474</b>  | 1663 | 2001 | <b>1832</b>   |
| AKR1E2   | 0,994871  | -0,411765 | <b>0,291553</b>  | 1930 | 2575 | <b>2252,5</b> |
| TK1      | 0,945707  | -0,362458 | <b>0,2916245</b> | 1843 | 2147 | <b>1995</b>   |
| ORC2     | -1,42053  | 2,004133  | <b>0,2918015</b> | 2112 | 2191 | <b>2151,5</b> |
| BCO2     | NaN       | 0,292181  | <b>0,292181</b>  | NaN  | 2922 | <b>2922</b>   |
| NTSR1    | 0,113983  | 0,470672  | <b>0,2923275</b> | 1846 | 1486 | <b>1666</b>   |
| NEO1     | 0,549842  | 0,034956  | <b>0,292399</b>  | 2201 | 1779 | <b>1990</b>   |

|          |           |           |                  |      |      |               |
|----------|-----------|-----------|------------------|------|------|---------------|
| ZNF432   | -0,042645 | 0,62746   | <b>0,2924075</b> | 1657 | 2372 | <b>2014,5</b> |
| PRCD     | 0,499261  | 0,085592  | <b>0,2924265</b> | 1800 | 2145 | <b>1972,5</b> |
| SLC35G1  | 0,29258   | NaN       | <b>0,29258</b>   | 1480 | NaN  | <b>1480</b>   |
| GCAT     | 1,070862  | -0,485584 | <b>0,292639</b>  | 1592 | 2142 | <b>1867</b>   |
| ATAD5    | 0,715069  | -0,129539 | <b>0,292765</b>  | 1318 | 2254 | <b>1786</b>   |
| RPS6     | 0,292833  | NaN       | <b>0,292833</b>  | 763  | NaN  | <b>763</b>    |
| PTCHD3   | 0,422321  | 0,163515  | <b>0,292918</b>  | 1465 | 2114 | <b>1789,5</b> |
| CRYBA1   | 0,492232  | 0,093795  | <b>0,2930135</b> | 1864 | 2199 | <b>2031,5</b> |
| MRPL10   | -0,440331 | 1,026404  | <b>0,2930365</b> | 1349 | 1546 | <b>1447,5</b> |
| GDA      | 0,484728  | 0,101438  | <b>0,293083</b>  | 1973 | 2560 | <b>2266,5</b> |
| SEC23IP  | 0,185195  | 0,401262  | <b>0,2932285</b> | 1751 | 1541 | <b>1646</b>   |
| OR52N1   | 0,336854  | 0,249641  | <b>0,2932475</b> | 1766 | 1879 | <b>1822,5</b> |
| IL12RB1  | 0,535745  | 0,050844  | <b>0,2932945</b> | 1847 | 2342 | <b>2094,5</b> |
| LUZP2    | -0,243067 | 0,830246  | <b>0,2935895</b> | 1707 | 2158 | <b>1932,5</b> |
| DDX6     | 0,123656  | 0,463583  | <b>0,2936195</b> | 1164 | 1719 | <b>1441,5</b> |
| HIVEP2   | 1,027133  | -0,439744 | <b>0,2936945</b> | 1788 | 2869 | <b>2328,5</b> |
| HOXD13   | 0,406455  | 0,181096  | <b>0,2937755</b> | 1193 | 1710 | <b>1451,5</b> |
| RPS6KA2  | 0,427276  | 0,160319  | <b>0,2937975</b> | 1861 | 2065 | <b>1963</b>   |
| SMAD1    | -0,570285 | 1,158379  | <b>0,294047</b>  | 1703 | 2493 | <b>2098</b>   |
| RPS11    | 0,586695  | 0,001688  | <b>0,2941915</b> | 941  | 1337 | <b>1139</b>   |
| THBS2    | 0,294217  | NaN       | <b>0,294217</b>  | 1568 | NaN  | <b>1568</b>   |
| AKT1S1   | 0,294283  | NaN       | <b>0,294283</b>  | 1405 | NaN  | <b>1405</b>   |
| KDM5C    | 0,425841  | 0,162867  | <b>0,294354</b>  | 1448 | 2169 | <b>1808,5</b> |
| MDH2     | 0,261357  | 0,327378  | <b>0,2943675</b> | 1290 | 1969 | <b>1629,5</b> |
| KIAA0513 | 0,446803  | 0,142065  | <b>0,294434</b>  | 1728 | 1911 | <b>1819,5</b> |
| SCGB1A1  | 0,131283  | 0,457815  | <b>0,294549</b>  | 2074 | 2521 | <b>2297,5</b> |
| TGFB1    | -0,946909 | 1,536239  | <b>0,294665</b>  | 1781 | 2139 | <b>1960</b>   |
| GCC1     | -0,649274 | 1,238759  | <b>0,2947425</b> | 1734 | 1956 | <b>1845</b>   |
| WDPCP    | 0,172659  | 0,416948  | <b>0,2948035</b> | 1441 | 1842 | <b>1641,5</b> |
| TAAR2    | -0,476268 | 1,066605  | <b>0,2951685</b> | 1816 | 2297 | <b>2056,5</b> |
| APOE     | 0,74839   | -0,157838 | <b>0,295276</b>  | 1131 | 1235 | <b>1183</b>   |
| PABPN1L  | -0,405141 | 0,995922  | <b>0,2953905</b> | 1507 | 1978 | <b>1742,5</b> |
| INTS7    | -0,02325  | 0,614515  | <b>0,2956325</b> | 1636 | 2372 | <b>2004</b>   |
| PITPNM1  | 0,316242  | 0,275116  | <b>0,295679</b>  | 1309 | 1901 | <b>1605</b>   |

|          |           |           |                  |      |      |               |
|----------|-----------|-----------|------------------|------|------|---------------|
| COG3     | 0,572492  | 0,019087  | <b>0,2957895</b> | 1884 | 1843 | <b>1863,5</b> |
| ATG4C    | 0,919574  | -0,327099 | <b>0,2962375</b> | 1662 | 2119 | <b>1890,5</b> |
| WSB2     | 0,413749  | 0,178735  | <b>0,296242</b>  | 1568 | 3108 | <b>2338</b>   |
| LIN52    | -0,262923 | 0,855447  | <b>0,296262</b>  | 1361 | 1780 | <b>1570,5</b> |
| PPP1R1B  | 0,377661  | 0,21497   | <b>0,2963155</b> | 1854 | 2074 | <b>1964</b>   |
| F9       | 0,665227  | -0,072341 | <b>0,296443</b>  | 2166 | 1907 | <b>2036,5</b> |
| CIR1     | 0,61399   | -0,020846 | <b>0,296572</b>  | 1656 | 1891 | <b>1773,5</b> |
| SMPDL3B  | 0,63586   | -0,042461 | <b>0,2966995</b> | 1577 | 2431 | <b>2004</b>   |
| ZNF793   | 0,883796  | -0,289765 | <b>0,2970155</b> | 2049 | 2587 | <b>2318</b>   |
| HIRIP3   | 0,297017  | NaN       | <b>0,297017</b>  | 1260 | NaN  | <b>1260</b>   |
| C1orf173 | 0,297252  | NaN       | <b>0,297252</b>  | 1886 | NaN  | <b>1886</b>   |
| FAM19A2  | 0,297285  | NaN       | <b>0,297285</b>  | 1287 | NaN  | <b>1287</b>   |
| CCDC80   | 0,297525  | NaN       | <b>0,297525</b>  | 1704 | NaN  | <b>1704</b>   |
| ANKRD43  | 0,311765  | 0,283951  | <b>0,297858</b>  | 1740 | 1897 | <b>1818,5</b> |
| CCDC91   | 0,630813  | -0,034979 | <b>0,297917</b>  | 1986 | 2188 | <b>2087</b>   |
| FAM83H   | 0,298205  | NaN       | <b>0,298205</b>  | 1352 | NaN  | <b>1352</b>   |
| HEYL     | 0,450016  | 0,146507  | <b>0,2982615</b> | 1118 | 1355 | <b>1236,5</b> |
| PRSS27   | -0,456798 | 1,053521  | <b>0,2983615</b> | 1375 | 2495 | <b>1935</b>   |
| TOMM20L  | 0,119404  | 0,477321  | <b>0,2983625</b> | 1844 | 2375 | <b>2109,5</b> |
| PPM1G    | 1,149845  | -0,552774 | <b>0,2985355</b> | 1830 | 2181 | <b>2005,5</b> |
| CLSTN1   | -0,041298 | 0,638411  | <b>0,2985565</b> | 1077 | 1479 | <b>1278</b>   |
| STOX2    | 0,568655  | 0,028464  | <b>0,2985595</b> | 1781 | 2633 | <b>2207</b>   |
| SHISA2   | 0,01694   | 0,580254  | <b>0,298597</b>  | 2097 | 1515 | <b>1806</b>   |
| RIBC1    | 0,548924  | 0,048569  | <b>0,2987465</b> | 1393 | 1811 | <b>1602</b>   |
| ZNF830   | 0,892985  | -0,295283 | <b>0,298851</b>  | 1813 | 2281 | <b>2047</b>   |
| LARGE    | 0,792759  | -0,194969 | <b>0,298895</b>  | 1514 | 2301 | <b>1907,5</b> |
| HR       | 0,008844  | 0,58909   | <b>0,298967</b>  | 1206 | 1896 | <b>1551</b>   |
| FAM188A  | 0,581529  | 0,016446  | <b>0,2989875</b> | 1723 | 1801 | <b>1762</b>   |
| CCDC140  | 0,888732  | -0,29072  | <b>0,299006</b>  | 1889 | 2002 | <b>1945,5</b> |
| ZFP28    | -0,314477 | 0,912925  | <b>0,299224</b>  | 1721 | 1590 | <b>1655,5</b> |
| CDC123   | -0,38999  | 0,988486  | <b>0,299248</b>  | 2003 | 2811 | <b>2407</b>   |
| WDR19    | 0,152593  | 0,446055  | <b>0,299324</b>  | 1500 | 1879 | <b>1689,5</b> |
| MTMR1    | 0,116994  | 0,481841  | <b>0,2994175</b> | 2260 | 2538 | <b>2399</b>   |
| ASPDH    | 1,100267  | -0,501204 | <b>0,2995315</b> | 1103 | 2324 | <b>1713,5</b> |

|          |           |           |                  |      |      |               |
|----------|-----------|-----------|------------------|------|------|---------------|
| ZIC1     | 0,110026  | 0,489454  | <b>0,29974</b>   | 1997 | 2088 | <b>2042,5</b> |
| DOHH     | 0,361185  | 0,238453  | <b>0,299819</b>  | 1135 | 1788 | <b>1461,5</b> |
| MLXIP    | 1,026389  | -0,425702 | <b>0,3003435</b> | 1793 | 1755 | <b>1774</b>   |
| MPST     | 1,837588  | -1,236548 | <b>0,30052</b>   | 1188 | 1942 | <b>1565</b>   |
| OR13C8   | -0,620285 | 1,221414  | <b>0,3005645</b> | 1276 | 1732 | <b>1504</b>   |
| AFF2     | 0,650384  | -0,048516 | <b>0,300934</b>  | 1629 | 2513 | <b>2071</b>   |
| VPS26B   | 0,301073  | NaN       | <b>0,301073</b>  | 2006 | NaN  | <b>2006</b>   |
| SLC10A5  | -0,212526 | 0,814801  | <b>0,3011375</b> | 2064 | 2031 | <b>2047,5</b> |
| LSM5     | 0,068522  | 0,534131  | <b>0,3013265</b> | 1751 | 2027 | <b>1889</b>   |
| TP53AIP1 | 1,000205  | -0,397547 | <b>0,301329</b>  | 1929 | 2055 | <b>1992</b>   |
| ADIPOR2  | 0,466148  | 0,136893  | <b>0,3015205</b> | 1776 | 2381 | <b>2078,5</b> |
| ZBTB47   | 0,301552  | NaN       | <b>0,301552</b>  | 1892 | NaN  | <b>1892</b>   |
| HS3ST5   | 0,60383   | -0,000462 | <b>0,301684</b>  | 1427 | 1954 | <b>1690,5</b> |
| DCBLD1   | 0,301854  | NaN       | <b>0,301854</b>  | 1778 | NaN  | <b>1778</b>   |
| SBF2     | 0,302     | NaN       | <b>0,302</b>     | 1150 | NaN  | <b>1150</b>   |
| P2RY1    | 0,302052  | NaN       | <b>0,302052</b>  | 1707 | NaN  | <b>1707</b>   |
| DNAJC17  | 0,975804  | -0,37114  | <b>0,302332</b>  | 1579 | 2567 | <b>2073</b>   |
| HSPA1L   | 0,609865  | -0,00509  | <b>0,3023875</b> | 1221 | 2229 | <b>1725</b>   |
| ECH1     | -0,584396 | 1,189261  | <b>0,3024325</b> | 1554 | 1648 | <b>1601</b>   |
| TTF1     | -0,616339 | 1,221582  | <b>0,3026215</b> | 1660 | 1519 | <b>1589,5</b> |
| PIKFYVE  | 0,153546  | 0,45189   | <b>0,302718</b>  | 1595 | 2035 | <b>1815</b>   |
| SMAD9    | 1,287791  | -0,682012 | <b>0,3028895</b> | 1716 | 2079 | <b>1897,5</b> |
| MRPS22   | 0,100271  | 0,506082  | <b>0,3031765</b> | 1589 | 1922 | <b>1755,5</b> |
| PPP5C    | 0,536592  | 0,070108  | <b>0,30335</b>   | 1829 | 2466 | <b>2147,5</b> |
| PAIP1    | 0,409683  | 0,1973    | <b>0,3034915</b> | 1571 | 2339 | <b>1955</b>   |
| LSM12    | 0,304357  | NaN       | <b>0,304357</b>  | 1762 | NaN  | <b>1762</b>   |
| TNC      | 0,495388  | 0,113499  | <b>0,3044435</b> | 1592 | 1754 | <b>1673</b>   |
| WBP5     | 0,764075  | -0,154962 | <b>0,3045565</b> | 2212 | 2460 | <b>2336</b>   |
| C1QTNF8  | 0,284589  | 0,324815  | <b>0,304702</b>  | 1874 | 2504 | <b>2189</b>   |
| ARHGEF6  | 0,682935  | -0,073059 | <b>0,304938</b>  | 1148 | 2003 | <b>1575,5</b> |
| NEDD1    | 0,098276  | 0,511692  | <b>0,304984</b>  | 955  | 996  | <b>975,5</b>  |
| PTGES2   | -0,038552 | 0,648532  | <b>0,30499</b>   | 1484 | 1727 | <b>1605,5</b> |
| C5orf32  | 1,059705  | -0,448773 | <b>0,305466</b>  | 1826 | 1854 | <b>1840</b>   |
| PNPLA3   | 0,155313  | 0,455742  | <b>0,3055275</b> | 1707 | 1959 | <b>1833</b>   |

|          |           |           |                  |      |      |               |
|----------|-----------|-----------|------------------|------|------|---------------|
| IRF8     | 0,059152  | 0,552707  | <b>0,3059295</b> | 1723 | 2276 | <b>1999,5</b> |
| CCDC85A  | 0,308587  | 0,303559  | <b>0,306073</b>  | 1630 | 2495 | <b>2062,5</b> |
| AMZ1     | 1,081163  | -0,468845 | <b>0,306159</b>  | 2122 | 2487 | <b>2304,5</b> |
| SHFM1    | -0,349231 | 0,961819  | <b>0,306294</b>  | 929  | 1239 | <b>1084</b>   |
| GNG5     | 0,306926  | NaN       | <b>0,306926</b>  | 1203 | NaN  | <b>1203</b>   |
| PTHLH    | 0,250979  | 0,363322  | <b>0,3071505</b> | 1571 | 1986 | <b>1778,5</b> |
| PI4KA    | 1,391033  | -0,776664 | <b>0,3071845</b> | 1623 | 2195 | <b>1909</b>   |
| SLC35C1  | 0,916467  | -0,30203  | <b>0,3072185</b> | 1520 | 2044 | <b>1782</b>   |
| DCAF4L2  | 0,431283  | 0,183424  | <b>0,3073535</b> | 1823 | 2325 | <b>2074</b>   |
| ADCY2    | 0,803236  | -0,187418 | <b>0,307909</b>  | 1593 | 2623 | <b>2108</b>   |
| ZNF510   | 0,69009   | -0,074082 | <b>0,308004</b>  | 2118 | 2271 | <b>2194,5</b> |
| FBXW12   | 1,176352  | -0,559272 | <b>0,30854</b>   | 1778 | 2829 | <b>2303,5</b> |
| SLC19A3  | 0,047828  | 0,569299  | <b>0,3085635</b> | 1739 | 1815 | <b>1777</b>   |
| ITM2B    | 0,308843  | NaN       | <b>0,308843</b>  | 1196 | NaN  | <b>1196</b>   |
| UCN      | 1,833019  | -1,21509  | <b>0,3089645</b> | 313  | 1532 | <b>922,5</b>  |
| HTR2C    | 0,309005  | NaN       | <b>0,309005</b>  | 2097 | NaN  | <b>2097</b>   |
| SPARCL1  | 0,701141  | -0,082606 | <b>0,3092675</b> | 1467 | 2125 | <b>1796</b>   |
| POLK     | 1,002951  | -0,383828 | <b>0,3095615</b> | 1749 | 2037 | <b>1893</b>   |
| CLCN4    | 0,343349  | 0,276154  | <b>0,3097515</b> | 1850 | 2257 | <b>2053,5</b> |
| SUB1     | -0,83006  | 1,449851  | <b>0,3098955</b> | 1659 | 2146 | <b>1902,5</b> |
| IQGAP3   | 0,425862  | 0,194306  | <b>0,310084</b>  | 1371 | 2394 | <b>1882,5</b> |
| BTBD1    | 0,114537  | 0,506404  | <b>0,3104705</b> | 1776 | 2363 | <b>2069,5</b> |
| OR2A14   | 0,777733  | -0,156267 | <b>0,310733</b>  | 1258 | 1611 | <b>1434,5</b> |
| TMEM121  | 0,751063  | -0,12958  | <b>0,3107415</b> | 2037 | 1807 | <b>1922</b>   |
| CCDC147  | 0,311249  | NaN       | <b>0,311249</b>  | 1299 | NaN  | <b>1299</b>   |
| OR51B5   | 0,919836  | -0,296972 | <b>0,311432</b>  | 1737 | 2518 | <b>2127,5</b> |
| DHX38    | NaN       | 0,311668  | <b>0,311668</b>  | NaN  | 2245 | <b>2245</b>   |
| PTPRZ1   | 2,202292  | -1,578922 | <b>0,311685</b>  | 1606 | 2327 | <b>1966,5</b> |
| HS3ST3B1 | 0,08938   | 0,534806  | <b>0,312093</b>  | 1593 | 1556 | <b>1574,5</b> |
| CLDN17   | 0,006282  | 0,617981  | <b>0,3121315</b> | 1698 | 2526 | <b>2112</b>   |
| SLC7A2   | 0,269854  | 0,355058  | <b>0,312456</b>  | 1692 | 1885 | <b>1788,5</b> |
| POGZ     | 0,310381  | 0,314866  | <b>0,3126235</b> | 1251 | 1672 | <b>1461,5</b> |
| CHMP4B   | 0,312742  | NaN       | <b>0,312742</b>  | 1448 | NaN  | <b>1448</b>   |
| USP45    | -0,025317 | 0,651088  | <b>0,3128855</b> | 2140 | 2248 | <b>2194</b>   |

|          |           |           |                  |      |      |               |
|----------|-----------|-----------|------------------|------|------|---------------|
| MED19    | 0,450743  | 0,175756  | <b>0,3132495</b> | 1920 | 2042 | <b>1981</b>   |
| IPMK     | 0,320917  | 0,305593  | <b>0,313255</b>  | 1361 | 2028 | <b>1694,5</b> |
| SERPING1 | 0,250764  | 0,376024  | <b>0,313394</b>  | 1772 | 1298 | <b>1535</b>   |
| MBD1     | NaN       | 0,313411  | <b>0,313411</b>  | NaN  | 1688 | <b>1688</b>   |
| HIATL1   | 0,313447  | NaN       | <b>0,313447</b>  | 1430 | NaN  | <b>1430</b>   |
| APOOL    | 0,198217  | 0,428924  | <b>0,3135705</b> | 1569 | 1730 | <b>1649,5</b> |
| ABCG4    | 0,660508  | -0,033037 | <b>0,3137355</b> | 1796 | 1749 | <b>1772,5</b> |
| WASF2    | 0,477821  | 0,150071  | <b>0,313946</b>  | 2169 | 2495 | <b>2332</b>   |
| CDH11    | 0,550845  | 0,077193  | <b>0,314019</b>  | 1769 | 1844 | <b>1806,5</b> |
| MST4     | -0,112965 | 0,741448  | <b>0,3142415</b> | 1653 | 2303 | <b>1978</b>   |
| SS18L2   | -0,028409 | 0,657102  | <b>0,3143465</b> | 1222 | 1955 | <b>1588,5</b> |
| VN1R2    | 0,314475  | NaN       | <b>0,314475</b>  | 1687 | NaN  | <b>1687</b>   |
| ZNRF4    | 0,08026   | 0,548746  | <b>0,314503</b>  | 733  | 1927 | <b>1330</b>   |
| NDFIP1   | 0,314627  | NaN       | <b>0,314627</b>  | 1652 | NaN  | <b>1652</b>   |
| ACPL2    | 0,415341  | 0,21444   | <b>0,3148905</b> | 1743 | 2421 | <b>2082</b>   |
| FN3K     | 0,214614  | 0,415577  | <b>0,3150955</b> | 1969 | 1912 | <b>1940,5</b> |
| RRAGD    | 1,030107  | -0,399527 | <b>0,31529</b>   | 1651 | 2798 | <b>2224,5</b> |
| ANKAR    | 0,049542  | 0,581929  | <b>0,3157355</b> | 1650 | 1685 | <b>1667,5</b> |
| C3orf43  | 0,315959  | NaN       | <b>0,315959</b>  | 1413 | NaN  | <b>1413</b>   |
| CALB1    | -0,746683 | 1,378835  | <b>0,316076</b>  | 1778 | 1775 | <b>1776,5</b> |
| ANKRD13C | -0,025665 | 0,658102  | <b>0,3162185</b> | 1716 | 2113 | <b>1914,5</b> |
| ZBPB     | 0,454786  | 0,177651  | <b>0,3162185</b> | 1997 | 2119 | <b>2058</b>   |
| ZNF665   | 0,316252  | NaN       | <b>0,316252</b>  | 1999 | NaN  | <b>1999</b>   |
| MAGEH1   | 1,290867  | -0,658336 | <b>0,3162655</b> | 1765 | 2232 | <b>1998,5</b> |
| SI       | 0,215373  | 0,417674  | <b>0,3165235</b> | 1787 | 2249 | <b>2018</b>   |
| DRG1     | 0,74328   | -0,109376 | <b>0,316952</b>  | 1784 | 2200 | <b>1992</b>   |
| S100A11  | 0,31696   | NaN       | <b>0,31696</b>   | 1467 | NaN  | <b>1467</b>   |
| CEND1    | 0,317056  | NaN       | <b>0,317056</b>  | 1908 | NaN  | <b>1908</b>   |
| C2orf67  | 0,518255  | 0,115974  | <b>0,3171145</b> | 2159 | 1735 | <b>1947</b>   |
| CHN1     | 0,317222  | NaN       | <b>0,317222</b>  | 1794 | NaN  | <b>1794</b>   |
| USMG5    | 0,747347  | -0,112871 | <b>0,317238</b>  | 1872 | 2045 | <b>1958,5</b> |
| PIK3R2   | 1,858823  | -1,223953 | <b>0,317435</b>  | 796  | 1905 | <b>1350,5</b> |
| PNMA5    | 0,317625  | NaN       | <b>0,317625</b>  | 1746 | NaN  | <b>1746</b>   |
| CA12     | 0,324371  | 0,310905  | <b>0,317638</b>  | 1318 | 2649 | <b>1983,5</b> |

|         |           |           |                  |      |      |               |
|---------|-----------|-----------|------------------|------|------|---------------|
| TRNT1   | 0,465953  | 0,169488  | <b>0,3177205</b> | 1316 | 1412 | <b>1364</b>   |
| SMG8    | 0,818449  | -0,182683 | <b>0,317883</b>  | 1457 | 1981 | <b>1719</b>   |
| FAM155A | 1,282367  | -0,646511 | <b>0,317928</b>  | 1841 | 1749 | <b>1795</b>   |
| HOXC4   | 0,76075   | -0,124692 | <b>0,318029</b>  | 1650 | 2772 | <b>2211</b>   |
| TTC14   | 0,318032  | NaN       | <b>0,318032</b>  | 1490 | NaN  | <b>1490</b>   |
| GALP    | -0,758392 | 1,394891  | <b>0,3182495</b> | 1781 | 2268 | <b>2024,5</b> |
| TNIK    | 0,32695   | 0,30964   | <b>0,318295</b>  | 1873 | 1815 | <b>1844</b>   |
| SPINT2  | -0,51978  | 1,156505  | <b>0,3183625</b> | 1857 | 2285 | <b>2071</b>   |
| FAM69C  | 1,109725  | -0,47294  | <b>0,3183925</b> | 1613 | 2237 | <b>1925</b>   |
| GPRASP1 | 0,757801  | -0,120632 | <b>0,3185845</b> | 1452 | 1657 | <b>1554,5</b> |
| FAM83F  | -0,236298 | 0,873564  | <b>0,318633</b>  | 1589 | 1842 | <b>1715,5</b> |
| RAET1G  | 0,441833  | 0,195552  | <b>0,3186925</b> | 1772 | 2370 | <b>2071</b>   |
| ARID3A  | 0,824334  | -0,18656  | <b>0,318887</b>  | 1817 | 2033 | <b>1925</b>   |
| CAPN9   | -0,108307 | 0,746343  | <b>0,319018</b>  | 1886 | 2027 | <b>1956,5</b> |
| COL2A1  | 0,329291  | 0,308967  | <b>0,319129</b>  | 1794 | 2121 | <b>1957,5</b> |
| TAF11   | 0,540617  | 0,0979    | <b>0,3192585</b> | 473  | 1141 | <b>807</b>    |
| CALD1   | -0,099369 | 0,73798   | <b>0,3193055</b> | 1821 | 2144 | <b>1982,5</b> |
| COL27A1 | 0,682012  | -0,042993 | <b>0,3195095</b> | 1470 | 2062 | <b>1766</b>   |
| DNTTIP2 | -0,576087 | 1,215336  | <b>0,3196245</b> | 826  | 837  | <b>831,5</b>  |
| NDEL1   | -0,735076 | 1,374556  | <b>0,31974</b>   | 1532 | 1832 | <b>1682</b>   |
| RAB33A  | 0,84828   | -0,208339 | <b>0,3199705</b> | 1948 | 2544 | <b>2246</b>   |
| TCEAL6  | -0,151658 | 0,792172  | <b>0,320257</b>  | 1495 | 2005 | <b>1750</b>   |
| SCEL    | 0,893152  | -0,252581 | <b>0,3202855</b> | 2226 | 3217 | <b>2721,5</b> |
| SV2A    | 0,479608  | 0,161111  | <b>0,3203595</b> | 1274 | 2034 | <b>1654</b>   |
| GPX8    | -0,23872  | 0,879617  | <b>0,3204485</b> | 1613 | 1981 | <b>1797</b>   |
| NMB     | 0,653467  | -0,012468 | <b>0,3204995</b> | 1491 | 2016 | <b>1753,5</b> |
| CCDC82  | 0,192366  | 0,449721  | <b>0,3210435</b> | 1726 | 2345 | <b>2035,5</b> |
| TRIM55  | 0,215047  | 0,427089  | <b>0,321068</b>  | 1771 | 2576 | <b>2173,5</b> |
| WDR66   | 0,578341  | 0,063802  | <b>0,3210715</b> | 1858 | 2870 | <b>2364</b>   |
| FBXL13  | 0,612886  | 0,029266  | <b>0,321076</b>  | 1605 | 2862 | <b>2233,5</b> |
| GDF2    | 0,889563  | -0,247266 | <b>0,3211485</b> | 1496 | 1736 | <b>1616</b>   |
| TMEM135 | 0,967184  | -0,32488  | <b>0,321152</b>  | 1921 | 2905 | <b>2413</b>   |
| POMC    | 1,113537  | -0,470961 | <b>0,321288</b>  | 1991 | 2860 | <b>2425,5</b> |
| HTR1B   | 0,321312  | NaN       | <b>0,321312</b>  | 1554 | NaN  | <b>1554</b>   |

|          |           |           |                  |      |      |               |
|----------|-----------|-----------|------------------|------|------|---------------|
| SLC15A4  | 0,481952  | 0,161117  | <b>0,3215345</b> | 1805 | 2043 | <b>1924</b>   |
| C1orf21  | 0,149958  | 0,493224  | <b>0,321591</b>  | 1927 | 2187 | <b>2057</b>   |
| NOL8     | 0,938513  | -0,295241 | <b>0,321636</b>  | 1752 | 1854 | <b>1803</b>   |
| TMEM167B | -1,74275  | 2,386151  | <b>0,3217005</b> | 1736 | 1888 | <b>1812</b>   |
| CLVS2    | 0,321704  | NaN       | <b>0,321704</b>  | 1736 | NaN  | <b>1736</b>   |
| ZCCHC5   | 1,29799   | -0,654571 | <b>0,3217095</b> | 1231 | 1812 | <b>1521,5</b> |
| RPL36AL  | 0,900973  | -0,257231 | <b>0,321871</b>  | 1429 | 2460 | <b>1944,5</b> |
| GRAMD3   | 0,547524  | 0,096589  | <b>0,3220565</b> | 1329 | 2776 | <b>2052,5</b> |
| OPA3     | 0,118772  | 0,525571  | <b>0,3221715</b> | 1449 | 2010 | <b>1729,5</b> |
| NR6A1    | -0,165028 | 0,809427  | <b>0,3221995</b> | 1885 | 2509 | <b>2197</b>   |
| GPHA2    | 0,322386  | NaN       | <b>0,322386</b>  | 1701 | NaN  | <b>1701</b>   |
| C4orf44  | -0,224382 | 0,869287  | <b>0,3224525</b> | 1737 | 1800 | <b>1768,5</b> |
| ZNF317   | 0,75823   | -0,112608 | <b>0,322811</b>  | 1815 | 1919 | <b>1867</b>   |
| CMTM4    | 0,32308   | NaN       | <b>0,32308</b>   | 1759 | NaN  | <b>1759</b>   |
| CRKL     | 0,115522  | 0,53082   | <b>0,323171</b>  | 2112 | 2021 | <b>2066,5</b> |
| PXT1     | 0,258519  | 0,387881  | <b>0,3232</b>    | 2178 | 2026 | <b>2102</b>   |
| TMEM97   | 0,323343  | NaN       | <b>0,323343</b>  | 1541 | NaN  | <b>1541</b>   |
| PLEKHH3  | 0,32337   | NaN       | <b>0,32337</b>   | 1736 | NaN  | <b>1736</b>   |
| RHOT1    | 0,595634  | 0,051533  | <b>0,3235835</b> | 1149 | 1647 | <b>1398</b>   |
| ALG3     | -0,420244 | 1,06765   | <b>0,323703</b>  | 1701 | 1738 | <b>1719,5</b> |
| LEPREL2  | NaN       | 0,323809  | <b>0,323809</b>  | NaN  | 2603 | <b>2603</b>   |
| ABHD2    | 0,363931  | 0,284155  | <b>0,324043</b>  | 1112 | 1543 | <b>1327,5</b> |
| CHTF18   | 0,298986  | 0,349453  | <b>0,3242195</b> | 1823 | 1780 | <b>1801,5</b> |
| CYP4F8   | -0,0762   | 0,725005  | <b>0,3244025</b> | 1957 | 2847 | <b>2402</b>   |
| FAM78B   | 0,739393  | -0,090519 | <b>0,324437</b>  | 1554 | 2231 | <b>1892,5</b> |
| NDST3    | 0,173749  | 0,475327  | <b>0,324538</b>  | 1665 | 1850 | <b>1757,5</b> |
| PTGER2   | 0,324919  | NaN       | <b>0,324919</b>  | 1519 | NaN  | <b>1519</b>   |
| TMUB2    | 0,272015  | 0,377887  | <b>0,324951</b>  | 1831 | 2314 | <b>2072,5</b> |
| MRPL52   | 0,528577  | 0,121622  | <b>0,3250995</b> | 1848 | 2367 | <b>2107,5</b> |
| MYO9A    | 0,233121  | 0,417565  | <b>0,325343</b>  | 1630 | 2088 | <b>1859</b>   |
| IFT81    | 0,32536   | NaN       | <b>0,32536</b>   | 1754 | NaN  | <b>1754</b>   |
| SIKE1    | 0,101374  | 0,549954  | <b>0,325664</b>  | 2038 | 2600 | <b>2319</b>   |
| GPR182   | 0,837561  | -0,185884 | <b>0,3258385</b> | 1560 | 1659 | <b>1609,5</b> |
| PEX2     | 0,097904  | 0,554607  | <b>0,3262555</b> | 1666 | 2321 | <b>1993,5</b> |



|          |           |           |                  |      |      |               |
|----------|-----------|-----------|------------------|------|------|---------------|
| MRPS30   | 0,092136  | 0,560558  | <b>0,326347</b>  | 2185 | 2858 | <b>2521,5</b> |
| ZNF23    | 0,560052  | 0,092889  | <b>0,3264705</b> | 2063 | 2259 | <b>2161</b>   |
| CNGA4    | 0,540856  | 0,112744  | <b>0,3268</b>    | 1359 | 2516 | <b>1937,5</b> |
| FOXM1    | 0,687805  | -0,033857 | <b>0,326974</b>  | 1646 | 1605 | <b>1625,5</b> |
| TMTC1    | 0,155169  | 0,498843  | <b>0,327006</b>  | 1694 | 2649 | <b>2171,5</b> |
| CFI      | 0,048292  | 0,605837  | <b>0,3270645</b> | 1672 | 1453 | <b>1562,5</b> |
| CHID1    | 0,66315   | -0,009007 | <b>0,3270715</b> | 1589 | 2735 | <b>2162</b>   |
| PFN2     | 0,375855  | 0,279141  | <b>0,327498</b>  | 1559 | 1627 | <b>1593</b>   |
| NKX2-8   | -0,138536 | 0,79379   | <b>0,327627</b>  | 1690 | 2130 | <b>1910</b>   |
| TRIM40   | 0,348088  | 0,307712  | <b>0,3279</b>    | 1885 | 2462 | <b>2173,5</b> |
| ELOVL3   | 1,072131  | -0,416273 | <b>0,327929</b>  | 1601 | 2023 | <b>1812</b>   |
| TMEM139  | 0,563747  | 0,092159  | <b>0,327953</b>  | 1786 | 2198 | <b>1992</b>   |
| GLRA2    | 0,337204  | 0,31924   | <b>0,328222</b>  | 1908 | 2598 | <b>2253</b>   |
| CHRNA2   | 0,365111  | 0,291356  | <b>0,3282335</b> | 2071 | 2554 | <b>2312,5</b> |
| SNRPD2   | 0,11619   | 0,540576  | <b>0,328383</b>  | 514  | 996  | <b>755</b>    |
| PAF1     | 0,793829  | -0,136784 | <b>0,3285225</b> | 1621 | 2439 | <b>2030</b>   |
| ROBO1    | 1,553133  | -0,896002 | <b>0,3285655</b> | 1762 | 2114 | <b>1938</b>   |
| SLC36A4  | 0,061906  | 0,595386  | <b>0,328646</b>  | 1545 | 2199 | <b>1872</b>   |
| ZNF280B  | 0,159309  | 0,498154  | <b>0,3287315</b> | 1357 | 2023 | <b>1690</b>   |
| SYN3     | 0,328863  | NaN       | <b>0,328863</b>  | 1822 | NaN  | <b>1822</b>   |
| KIAA1217 | 1,025468  | -0,367724 | <b>0,328872</b>  | 2207 | 2251 | <b>2229</b>   |
| CERS6    | 0,010634  | 0,64733   | <b>0,328982</b>  | 2314 | 1967 | <b>2140,5</b> |
| KCNC3    | 0,019586  | 0,638669  | <b>0,3291275</b> | 1393 | 2219 | <b>1806</b>   |
| INHA     | 0,160529  | 0,498264  | <b>0,3293965</b> | 981  | 2223 | <b>1602</b>   |
| CARD11   | -0,153137 | 0,812171  | <b>0,329517</b>  | 1760 | 2077 | <b>1918,5</b> |
| CDCA5    | 0,329726  | NaN       | <b>0,329726</b>  | 672  | NaN  | <b>672</b>    |
| VAT1     | 1,278495  | -0,618955 | <b>0,32977</b>   | 1472 | 1534 | <b>1503</b>   |
| SCN1A    | 0,584207  | 0,075335  | <b>0,329771</b>  | 2292 | 3014 | <b>2653</b>   |
| TUSC5    | 0,329907  | NaN       | <b>0,329907</b>  | 1499 | NaN  | <b>1499</b>   |
| OLFML3   | 0,656574  | 0,003303  | <b>0,3299385</b> | 1757 | 1864 | <b>1810,5</b> |
| TF       | 0,57117   | 0,088875  | <b>0,3300225</b> | 1794 | 1724 | <b>1759</b>   |
| CST6     | 0,155642  | 0,504507  | <b>0,3300745</b> | 1910 | 1556 | <b>1733</b>   |
| VCAN     | 0,330082  | NaN       | <b>0,330082</b>  | 1818 | NaN  | <b>1818</b>   |
| C4orf51  | 0,330127  | NaN       | <b>0,330127</b>  | 1776 | NaN  | <b>1776</b>   |

|          |           |           |                  |      |      |               |
|----------|-----------|-----------|------------------|------|------|---------------|
| RIPK1    | 0,142432  | 0,517856  | <b>0,330144</b>  | 1799 | 1829 | <b>1814</b>   |
| TUB      | 0,476874  | 0,183557  | <b>0,3302155</b> | 1492 | 1623 | <b>1557,5</b> |
| IFI27L1  | 0,112337  | 0,548189  | <b>0,330263</b>  | 2196 | 2064 | <b>2130</b>   |
| ZNF221   | -0,515913 | 1,176535  | <b>0,330311</b>  | 1911 | 2271 | <b>2091</b>   |
| C16orf91 | 0,330685  | NaN       | <b>0,330685</b>  | 1634 | NaN  | <b>1634</b>   |
| FAM196A  | 0,904688  | -0,243167 | <b>0,3307605</b> | 1922 | 2061 | <b>1991,5</b> |
| COBL     | 0,330876  | NaN       | <b>0,330876</b>  | 1829 | NaN  | <b>1829</b>   |
| C11orf46 | -0,145921 | 0,807701  | <b>0,33089</b>   | 1717 | 2146 | <b>1931,5</b> |
| RASL11B  | 0,395587  | 0,266194  | <b>0,3308905</b> | 1634 | 1900 | <b>1767</b>   |
| FBXO44   | 0,867277  | -0,205316 | <b>0,3309805</b> | 805  | 1556 | <b>1180,5</b> |
| ZAP70    | 0,778336  | -0,115992 | <b>0,331172</b>  | 1726 | 2198 | <b>1962</b>   |
| FGL2     | 0,382339  | 0,280534  | <b>0,3314365</b> | 1595 | 1772 | <b>1683,5</b> |
| SNRNP200 | 0,772225  | -0,109151 | <b>0,331537</b>  | 978  | 1062 | <b>1020</b>   |
| UFSP2    | 0,391179  | 0,272093  | <b>0,331636</b>  | 1743 | 1779 | <b>1761</b>   |
| PHGDH    | 0,508697  | 0,154711  | <b>0,331704</b>  | 1910 | 1908 | <b>1909</b>   |
| PLD5     | 0,24157   | 0,422043  | <b>0,3318065</b> | 1346 | 1885 | <b>1615,5</b> |
| SFRP1    | 0,789899  | -0,125079 | <b>0,33241</b>   | 954  | 1528 | <b>1241</b>   |
| ZNF703   | 0,316454  | 0,348408  | <b>0,332431</b>  | 1437 | 1970 | <b>1703,5</b> |
| VAMP4    | 0,670249  | -0,004787 | <b>0,332731</b>  | 1897 | 2070 | <b>1983,5</b> |
| C11orf61 | 0,332774  | NaN       | <b>0,332774</b>  | 1681 | NaN  | <b>1681</b>   |
| RC3H1    | 0,597898  | 0,067656  | <b>0,332777</b>  | 1587 | 2183 | <b>1885</b>   |
| TMEM138  | 0,332377  | 0,333347  | <b>0,332862</b>  | 1760 | 2545 | <b>2152,5</b> |
| APBA3    | 0,1469    | 0,518894  | <b>0,332897</b>  | 1614 | 2120 | <b>1867</b>   |
| NCOA5    | 0,466929  | 0,1989    | <b>0,3329145</b> | 1088 | 1717 | <b>1402,5</b> |
| MPV17L   | -0,912437 | 1,57836   | <b>0,3329615</b> | 1831 | 2207 | <b>2019</b>   |
| UNC5A    | 0,804973  | -0,138653 | <b>0,33316</b>   | 1894 | 1808 | <b>1851</b>   |
| C3orf20  | 0,346758  | 0,319993  | <b>0,3333755</b> | 1441 | 1466 | <b>1453,5</b> |
| RGS6     | -0,394975 | 1,061972  | <b>0,3334985</b> | 1693 | 1789 | <b>1741</b>   |
| C18orf1  | 1,510818  | -0,843441 | <b>0,3336885</b> | 1903 | 1966 | <b>1934,5</b> |
| CNDP2    | 0,274576  | 0,392897  | <b>0,3337365</b> | 1242 | 2657 | <b>1949,5</b> |
| CLDN11   | 1,202601  | -0,53491  | <b>0,3338455</b> | 1679 | 1594 | <b>1636,5</b> |
| STEAP3   | -0,276783 | 0,94449   | <b>0,3338535</b> | 1163 | 1545 | <b>1354</b>   |
| RPL26    | 0,272306  | 0,395512  | <b>0,333909</b>  | 1307 | 1733 | <b>1520</b>   |
| PPARG    | -1,56295  | 2,230851  | <b>0,3339505</b> | 1267 | 1733 | <b>1500</b>   |

|          |           |           |                  |      |      |               |
|----------|-----------|-----------|------------------|------|------|---------------|
| CLDN9    | 0,510227  | 0,157799  | <b>0,334013</b>  | 1891 | 1845 | <b>1868</b>   |
| COMP     | 0,353148  | 0,314909  | <b>0,3340285</b> | 1655 | 2741 | <b>2198</b>   |
| MRPL45   | 0,900734  | -0,232157 | <b>0,3342885</b> | 1740 | 2097 | <b>1918,5</b> |
| OR6C70   | 0,342004  | 0,32679   | <b>0,334397</b>  | 1801 | 2373 | <b>2087</b>   |
| PPIG     | 0,494499  | 0,174427  | <b>0,334463</b>  | 1690 | 2722 | <b>2206</b>   |
| SPRY4    | 0,224013  | 0,44495   | <b>0,3344815</b> | 1466 | 1774 | <b>1620</b>   |
| C3orf58  | 0,498235  | 0,171199  | <b>0,334717</b>  | 1825 | 1814 | <b>1819,5</b> |
| SLC25A26 | 0,334722  | NaN       | <b>0,334722</b>  | 2015 | NaN  | <b>2015</b>   |
| CGN      | 0,334999  | NaN       | <b>0,334999</b>  | 1492 | NaN  | <b>1492</b>   |
| ZCCHC24  | 0,335268  | NaN       | <b>0,335268</b>  | 1443 | NaN  | <b>1443</b>   |
| CAPN6    | 0,095415  | 0,575269  | <b>0,335342</b>  | 1753 | 1528 | <b>1640,5</b> |
| FOXP3    | 0,113844  | 0,556944  | <b>0,335394</b>  | 1746 | 2381 | <b>2063,5</b> |
| BTBD8    | 0,335447  | NaN       | <b>0,335447</b>  | 1680 | NaN  | <b>1680</b>   |
| EPHA1    | 1,263438  | -0,591137 | <b>0,3361505</b> | 2036 | 2171 | <b>2103,5</b> |
| ADAP2    | -0,035431 | 0,70774   | <b>0,3361545</b> | 1757 | 1869 | <b>1813</b>   |
| CITED1   | 1,223667  | -0,55111  | <b>0,3362785</b> | 1818 | 2143 | <b>1980,5</b> |
| RNASE11  | 0,764634  | -0,092051 | <b>0,3362915</b> | 2238 | 1854 | <b>2046</b>   |
| MAB21L1  | 1,589931  | -0,91615  | <b>0,3368905</b> | 1459 | 1430 | <b>1444,5</b> |
| NCOR1    | 1,223105  | -0,549075 | <b>0,337015</b>  | 1524 | 2027 | <b>1775,5</b> |
| LEFTY2   | 0,959592  | -0,28461  | <b>0,337491</b>  | 2135 | 2308 | <b>2221,5</b> |
| TMEM98   | 0,337542  | NaN       | <b>0,337542</b>  | 1415 | NaN  | <b>1415</b>   |
| GCM2     | NaN       | 0,337985  | <b>0,337985</b>  | NaN  | 2608 | <b>2608</b>   |
| DAB2IP   | -0,212885 | 0,889225  | <b>0,33817</b>   | 1165 | 1365 | <b>1265</b>   |
| FGF4     | -0,270042 | 0,946417  | <b>0,3381875</b> | 1717 | 1753 | <b>1735</b>   |
| TUBB2C   | 0,789312  | -0,11249  | <b>0,338411</b>  | 1305 | 1798 | <b>1551,5</b> |
| RGS5     | 0,338453  | NaN       | <b>0,338453</b>  | 1607 | NaN  | <b>1607</b>   |
| PLEKHH2  | 0,513405  | 0,163833  | <b>0,338619</b>  | 1671 | 2057 | <b>1864</b>   |
| GRM3     | 0,055665  | 0,6216    | <b>0,3386325</b> | 1922 | 1926 | <b>1924</b>   |
| FBXO46   | 0,571528  | 0,106183  | <b>0,3388555</b> | 1613 | 2243 | <b>1928</b>   |
| PROCR    | -1,298531 | 1,976561  | <b>0,339015</b>  | 1447 | 1907 | <b>1677</b>   |
| ZDHHC4   | 0,339099  | NaN       | <b>0,339099</b>  | 1500 | NaN  | <b>1500</b>   |
| CUL5     | 0,264522  | 0,414077  | <b>0,3392995</b> | 1434 | 2745 | <b>2089,5</b> |
| MTIF3    | 1,191709  | -0,512962 | <b>0,3393735</b> | 1285 | 2114 | <b>1699,5</b> |
| MBTPS2   | 1,309374  | -0,630438 | <b>0,339468</b>  | 1504 | 2405 | <b>1954,5</b> |

|          |           |           |                  |      |      |               |
|----------|-----------|-----------|------------------|------|------|---------------|
| PHF21A   | 0,428424  | 0,251034  | <b>0,339729</b>  | 1149 | 2371 | <b>1760</b>   |
| C1orf131 | 0,339895  | NaN       | <b>0,339895</b>  | 1703 | NaN  | <b>1703</b>   |
| DENND3   | 0,861849  | -0,182046 | <b>0,3399015</b> | 1374 | 1815 | <b>1594,5</b> |
| ZFYVE1   | 0,700853  | -0,020071 | <b>0,340391</b>  | 1543 | 1854 | <b>1698,5</b> |
| PCDHGB6  | 0,340398  | NaN       | <b>0,340398</b>  | 1921 | NaN  | <b>1921</b>   |
| CD6      | 0,492392  | 0,188551  | <b>0,3404715</b> | 1034 | 1797 | <b>1415,5</b> |
| ZDHHC22  | -0,353024 | 1,034019  | <b>0,3404975</b> | 1658 | 1898 | <b>1778</b>   |
| RAD18    | 0,727522  | -0,046334 | <b>0,340594</b>  | 1949 | 2588 | <b>2268,5</b> |
| MATN3    | -0,152813 | 0,834494  | <b>0,3408405</b> | 2202 | 2689 | <b>2445,5</b> |
| CPNE3    | 0,413993  | 0,267935  | <b>0,340964</b>  | 1589 | 2137 | <b>1863</b>   |
| EFTUD2   | 0,202019  | 0,479985  | <b>0,341002</b>  | 866  | 1210 | <b>1038</b>   |
| BDKRB1   | 0,341182  | NaN       | <b>0,341182</b>  | 1720 | NaN  | <b>1720</b>   |
| TMEM26   | -0,709598 | 1,392104  | <b>0,341253</b>  | 1565 | 1958 | <b>1761,5</b> |
| APLNR    | 0,341308  | NaN       | <b>0,341308</b>  | 1277 | NaN  | <b>1277</b>   |
| TAF1C    | 0,318791  | 0,363868  | <b>0,3413295</b> | 1566 | 1965 | <b>1765,5</b> |
| MAN2C1   | 0,774508  | -0,091699 | <b>0,3414045</b> | 2051 | 2620 | <b>2335,5</b> |
| ICA1     | 0,129616  | 0,553291  | <b>0,3414535</b> | 2046 | 2986 | <b>2516</b>   |
| PDE6C    | 0,271777  | 0,411322  | <b>0,3415495</b> | 1853 | 2550 | <b>2201,5</b> |
| KAZALD1  | 0,545883  | 0,137217  | <b>0,34155</b>   | 1888 | 2073 | <b>1980,5</b> |
| ZC3H11A  | 0,341753  | NaN       | <b>0,341753</b>  | 1658 | NaN  | <b>1658</b>   |
| SMARCA5  | -0,271462 | 0,95507   | <b>0,341804</b>  | 1335 | 2631 | <b>1983</b>   |
| FBXO7    | 0,573555  | 0,110552  | <b>0,3420535</b> | 1629 | 2790 | <b>2209,5</b> |
| CHMP2A   | 0,277156  | 0,407842  | <b>0,342499</b>  | 748  | 1440 | <b>1094</b>   |
| RABEP2   | 0,506599  | 0,178445  | <b>0,342522</b>  | 1504 | 1655 | <b>1579,5</b> |
| COX10    | -0,29707  | 0,982289  | <b>0,3426095</b> | 1424 | 2074 | <b>1749</b>   |
| RANBP3   | -0,09781  | 0,783699  | <b>0,3429445</b> | 2200 | 2344 | <b>2272</b>   |
| NUDC     | 0,342972  | NaN       | <b>0,342972</b>  | 1777 | NaN  | <b>1777</b>   |
| ADH1A    | 0,40788   | 0,278092  | <b>0,342986</b>  | 1427 | 1963 | <b>1695</b>   |
| EHD4     | -0,863033 | 1,549166  | <b>0,3430665</b> | 1498 | 2517 | <b>2007,5</b> |
| CSPG4    | 0,282965  | 0,403453  | <b>0,343209</b>  | 1359 | 2037 | <b>1698</b>   |
| SS18L1   | 0,910175  | -0,223081 | <b>0,343547</b>  | 1763 | 2008 | <b>1885,5</b> |
| PCOLCE2  | -0,088603 | 0,776254  | <b>0,3438255</b> | 869  | 1619 | <b>1244</b>   |
| ZBTB16   | 0,500366  | 0,187441  | <b>0,3439035</b> | 986  | 2031 | <b>1508,5</b> |
| C19orf55 | 0,900113  | -0,212231 | <b>0,343941</b>  | 1590 | 2259 | <b>1924,5</b> |

|          |           |           |                  |      |      |               |
|----------|-----------|-----------|------------------|------|------|---------------|
| CCKAR    | 0,344033  | NaN       | <b>0,344033</b>  | 1603 | NaN  | <b>1603</b>   |
| METTL20  | 0,48457   | 0,203621  | <b>0,3440955</b> | 1755 | 2386 | <b>2070,5</b> |
| DDX47    | 1,260754  | -0,572375 | <b>0,3441895</b> | 1133 | 1462 | <b>1297,5</b> |
| DCTN2    | -0,271693 | 0,960206  | <b>0,3442565</b> | 1530 | 1812 | <b>1671</b>   |
| HEXIM1   | 0,93858   | -0,249845 | <b>0,3443675</b> | 1541 | 1793 | <b>1667</b>   |
| TMEM159  | 0,778371  | -0,089605 | <b>0,344383</b>  | 1426 | 1786 | <b>1606</b>   |
| EXD2     | 0,345026  | NaN       | <b>0,345026</b>  | 1387 | NaN  | <b>1387</b>   |
| GIMAP4   | 0,932931  | -0,242635 | <b>0,345148</b>  | 1433 | 2015 | <b>1724</b>   |
| HTN3     | 0,051404  | 0,639417  | <b>0,3454105</b> | 1635 | 2294 | <b>1964,5</b> |
| LGI1     | 0,323334  | 0,367534  | <b>0,345434</b>  | 1513 | 2641 | <b>2077</b>   |
| DUS1L    | 0,628951  | 0,061933  | <b>0,345442</b>  | 1677 | 1917 | <b>1797</b>   |
| LHFPL2   | NaN       | 0,345502  | <b>0,345502</b>  | NaN  | 3123 | <b>3123</b>   |
| SH2D3C   | 0,320333  | 0,370692  | <b>0,3455125</b> | 1552 | 1624 | <b>1588</b>   |
| BCAT1    | -0,509813 | 1,200928  | <b>0,3455575</b> | 1944 | 2101 | <b>2022,5</b> |
| LAMC2    | -0,20052  | 0,891902  | <b>0,345691</b>  | 1386 | 1876 | <b>1631</b>   |
| HEXB     | 0,609924  | 0,082178  | <b>0,346051</b>  | 1400 | 1756 | <b>1578</b>   |
| ZC3HAV1  | 0,064969  | 0,627201  | <b>0,346085</b>  | 1493 | 2046 | <b>1769,5</b> |
| SLC9A3R1 | 0,202432  | 0,489981  | <b>0,3462065</b> | 1604 | 1975 | <b>1789,5</b> |
| XAB2     | 0,37038   | 0,322311  | <b>0,3463455</b> | 1199 | 1640 | <b>1419,5</b> |
| TRAPPC10 | -0,730284 | 1,423014  | <b>0,346365</b>  | 1865 | 1882 | <b>1873,5</b> |
| CDC42EP4 | 0,346576  | NaN       | <b>0,346576</b>  | 1468 | NaN  | <b>1468</b>   |
| NGDN     | 0,200135  | 0,493401  | <b>0,346768</b>  | 1168 | 1559 | <b>1363,5</b> |
| SNAP25   | 1,064447  | -0,370377 | <b>0,347035</b>  | 1283 | 3099 | <b>2191</b>   |
| P2RX6    | 0,328195  | 0,365913  | <b>0,347054</b>  | 1487 | 2099 | <b>1793</b>   |
| TBCD     | -0,046243 | 0,740806  | <b>0,3472815</b> | 1914 | 2212 | <b>2063</b>   |
| TSNARE1  | 0,347536  | NaN       | <b>0,347536</b>  | 1664 | NaN  | <b>1664</b>   |
| CRTAC1   | 0,459388  | 0,236091  | <b>0,3477395</b> | 1883 | 1915 | <b>1899</b>   |
| OSGIN2   | 0,347812  | NaN       | <b>0,347812</b>  | 2020 | NaN  | <b>2020</b>   |
| PRPF18   | -0,870293 | 1,565954  | <b>0,3478305</b> | 1413 | 2227 | <b>1820</b>   |
| ANKRD56  | 0,743681  | -0,047813 | <b>0,347934</b>  | 1507 | 2206 | <b>1856,5</b> |
| AKR1A1   | 0,467263  | 0,229555  | <b>0,348409</b>  | 1858 | 2083 | <b>1970,5</b> |
| OR2T4    | 1,243719  | -0,54686  | <b>0,3484295</b> | 1808 | 2230 | <b>2019</b>   |
| SLCO1C1  | 0,578238  | 0,118627  | <b>0,3484325</b> | 1433 | 2920 | <b>2176,5</b> |
| SIX4     | NaN       | 0,348535  | <b>0,348535</b>  | NaN  | 3200 | <b>3200</b>   |

|           |           |           |                  |      |      |               |
|-----------|-----------|-----------|------------------|------|------|---------------|
| FOXC1     | -0,01118  | 0,708734  | <b>0,348777</b>  | 1820 | 2104 | <b>1962</b>   |
| BRF1      | 0,269821  | 0,428223  | <b>0,349022</b>  | 1054 | 1446 | <b>1250</b>   |
| PSD4      | 0,349033  | NaN       | <b>0,349033</b>  | 1913 | NaN  | <b>1913</b>   |
| COLEC11   | 0,349355  | NaN       | <b>0,349355</b>  | 1469 | NaN  | <b>1469</b>   |
| CXCL1     | 0,349641  | NaN       | <b>0,349641</b>  | 1658 | NaN  | <b>1658</b>   |
| PLG       | 0,036511  | 0,663463  | <b>0,349987</b>  | 1138 | 1965 | <b>1551,5</b> |
| MRPL34    | -0,388712 | 1,088838  | <b>0,350063</b>  | 999  | 1828 | <b>1413,5</b> |
| C12orf59  | 0,765826  | -0,064846 | <b>0,35049</b>   | 1709 | 2260 | <b>1984,5</b> |
| STRA8     | 0,703582  | -0,002211 | <b>0,3506855</b> | 1818 | 2352 | <b>2085</b>   |
| F5        | 0,318834  | 0,382557  | <b>0,3506955</b> | 1748 | 2844 | <b>2296</b>   |
| HEATR2    | 0,59739   | 0,104497  | <b>0,3509435</b> | 1651 | 1534 | <b>1592,5</b> |
| CXorf65   | 0,082569  | 0,619336  | <b>0,3509525</b> | 1763 | 2107 | <b>1935</b>   |
| KCNK1     | 1,306954  | -0,605033 | <b>0,3509605</b> | 1453 | 2475 | <b>1964</b>   |
| ANKS1A    | 0,644949  | 0,056986  | <b>0,3509675</b> | 1940 | 2448 | <b>2194</b>   |
| HLA-L     | -0,064597 | 0,767384  | <b>0,3513935</b> | 1670 | 1707 | <b>1688,5</b> |
| HLA-DRB5  | 0,351457  | NaN       | <b>0,351457</b>  | 1787 | NaN  | <b>1787</b>   |
| C12orf76  | 0,458846  | 0,244374  | <b>0,35161</b>   | 2106 | 2526 | <b>2316</b>   |
| PSORS1C2  | 0,677629  | 0,026095  | <b>0,351862</b>  | 1542 | 2131 | <b>1836,5</b> |
| OR8G2     | 0,351915  | NaN       | <b>0,351915</b>  | 1843 | NaN  | <b>1843</b>   |
| C9orf140  | 0,442032  | 0,262762  | <b>0,352397</b>  | 2049 | 1709 | <b>1879</b>   |
| MAP7D1    | 1,242334  | -0,537519 | <b>0,3524075</b> | 1599 | 2452 | <b>2025,5</b> |
| PLIN4     | 0,352679  | NaN       | <b>0,352679</b>  | 1834 | NaN  | <b>1834</b>   |
| C14orf118 | 0,510551  | 0,194816  | <b>0,3526835</b> | 1392 | 1615 | <b>1503,5</b> |
| NFATC2    | 0,457098  | 0,248502  | <b>0,3528</b>    | 1581 | 2272 | <b>1926,5</b> |
| TOR1A     | 0,019759  | 0,686274  | <b>0,3530165</b> | 1877 | 2105 | <b>1991</b>   |
| ODZ3      | 0,262662  | 0,44356   | <b>0,353111</b>  | 1827 | 1912 | <b>1869,5</b> |
| CDC23     | 0,877751  | -0,171435 | <b>0,353158</b>  | 1610 | 2086 | <b>1848</b>   |
| DNMT3L    | 0,236344  | 0,470709  | <b>0,3535265</b> | 1901 | 2376 | <b>2138,5</b> |
| C10orf92  | 0,54327   | 0,163947  | <b>0,3536085</b> | 1858 | 2117 | <b>1987,5</b> |
| HEXA      | 0,002644  | 0,704709  | <b>0,3536765</b> | 945  | 1669 | <b>1307</b>   |
| MBTD1     | -0,020321 | 0,728329  | <b>0,354004</b>  | 1862 | 2272 | <b>2067</b>   |
| C7orf69   | 0,871272  | -0,162881 | <b>0,3541955</b> | 709  | 807  | <b>758</b>    |
| CXCR7     | 0,354396  | NaN       | <b>0,354396</b>  | 1711 | NaN  | <b>1711</b>   |
| SUMO3     | 1,084038  | -0,375139 | <b>0,3544495</b> | 2029 | 2450 | <b>2239,5</b> |

|           |           |           |                  |      |      |               |
|-----------|-----------|-----------|------------------|------|------|---------------|
| FGF18     | 0,163008  | 0,546459  | <b>0,3547335</b> | 1707 | 2076 | <b>1891,5</b> |
| LYRM7     | 0,482358  | 0,227135  | <b>0,3547465</b> | 1798 | 2703 | <b>2250,5</b> |
| CXCL11    | 0,599736  | 0,109843  | <b>0,3547895</b> | 1251 | 1468 | <b>1359,5</b> |
| GPR56     | 0,355043  | NaN       | <b>0,355043</b>  | 1381 | NaN  | <b>1381</b>   |
| ZNF14     | 0,355216  | NaN       | <b>0,355216</b>  | 1878 | NaN  | <b>1878</b>   |
| IL10RA    | 1,05892   | -0,347751 | <b>0,3555845</b> | 1082 | 1169 | <b>1125,5</b> |
| BRPF1     | 0,06024   | 0,651007  | <b>0,3556235</b> | 2180 | 2813 | <b>2496,5</b> |
| HDGFL1    | 0,355899  | NaN       | <b>0,355899</b>  | 1592 | NaN  | <b>1592</b>   |
| CALCOCO2  | -0,033202 | 0,745018  | <b>0,355908</b>  | 1947 | 2420 | <b>2183,5</b> |
| DSG4      | 0,188774  | 0,523701  | <b>0,3562375</b> | 1388 | 2509 | <b>1948,5</b> |
| OR10R2    | 0,919739  | -0,206634 | <b>0,3565525</b> | 2048 | 2415 | <b>2231,5</b> |
| CCDC120   | 0,356651  | NaN       | <b>0,356651</b>  | 1781 | NaN  | <b>1781</b>   |
| SERPINB10 | 0,29816   | 0,415296  | <b>0,356728</b>  | 1759 | 2188 | <b>1973,5</b> |
| ACSL4     | 0,533316  | 0,180386  | <b>0,356851</b>  | 1798 | 2217 | <b>2007,5</b> |
| TMEM59L   | -0,09707  | 0,810851  | <b>0,3568905</b> | 1270 | 1750 | <b>1510</b>   |
| ANPEP     | 0,105559  | 0,608408  | <b>0,3569835</b> | 1851 | 1942 | <b>1896,5</b> |
| MAB21L3   | 0,331364  | 0,382982  | <b>0,357173</b>  | 1714 | 2278 | <b>1996</b>   |
| ZNF529    | 0,251205  | 0,463287  | <b>0,357246</b>  | 1328 | 1934 | <b>1631</b>   |
| DGKA      | 1,038517  | -0,323676 | <b>0,3574205</b> | 1256 | 1992 | <b>1624</b>   |
| TUBGCP3   | 0,51349   | 0,201384  | <b>0,357437</b>  | 1592 | 1571 | <b>1581,5</b> |
| CMA1      | 0,205361  | 0,510649  | <b>0,358005</b>  | 1650 | 2225 | <b>1937,5</b> |
| HES7      | 0,907585  | -0,191387 | <b>0,358099</b>  | 1003 | 1658 | <b>1330,5</b> |
| DEFB121   | 0,975128  | -0,258145 | <b>0,3584915</b> | 1860 | 2322 | <b>2091</b>   |
| STAT5A    | 0,557041  | 0,16032   | <b>0,3586805</b> | 1809 | 2431 | <b>2120</b>   |
| STK40     | 1,499408  | -0,781323 | <b>0,3590425</b> | 1743 | 1934 | <b>1838,5</b> |
| PRKDC     | 0,509196  | 0,209274  | <b>0,359235</b>  | 1580 | 2146 | <b>1863</b>   |
| KIAA0146  | -1,167638 | 1,886213  | <b>0,3592875</b> | 1790 | 2102 | <b>1946</b>   |
| MGAT2     | 1,794733  | -1,076134 | <b>0,3592995</b> | 1053 | 1631 | <b>1342</b>   |
| TRMU      | NaN       | 0,359766  | <b>0,359766</b>  | NaN  | 3154 | <b>3154</b>   |
| ING2      | 0,890111  | -0,169813 | <b>0,360149</b>  | 1534 | 2594 | <b>2064</b>   |
| ERV3-1    | 0,360349  | NaN       | <b>0,360349</b>  | 1594 | NaN  | <b>1594</b>   |
| CLVS1     | 0,883419  | -0,162092 | <b>0,3606635</b> | 2005 | 1841 | <b>1923</b>   |
| UBE2CBP   | 0,099926  | 0,62149   | <b>0,360708</b>  | 1646 | 1753 | <b>1699,5</b> |
| PEBP4     | 0,841115  | -0,119289 | <b>0,360913</b>  | 2141 | 2225 | <b>2183</b>   |

|           |           |           |                  |      |      |               |
|-----------|-----------|-----------|------------------|------|------|---------------|
| TCN1      | 0,438775  | 0,283174  | <b>0,3609745</b> | 1876 | 1900 | <b>1888</b>   |
| C20orf103 | 0,238066  | 0,484277  | <b>0,3611715</b> | 1153 | 1822 | <b>1487,5</b> |
| ZNF823    | 0,230308  | 0,492155  | <b>0,3612315</b> | 1598 | 1818 | <b>1708</b>   |
| TELO2     | 0,361329  | NaN       | <b>0,361329</b>  | 1405 | NaN  | <b>1405</b>   |
| DGKB      | 0,359272  | 0,363461  | <b>0,3613665</b> | 2308 | 2258 | <b>2283</b>   |
| ARL8B     | -0,359344 | 1,082132  | <b>0,361394</b>  | 1883 | 1901 | <b>1892</b>   |
| TRIM71    | 1,117789  | -0,394966 | <b>0,3614115</b> | 1574 | 2085 | <b>1829,5</b> |
| F10       | 0,571511  | 0,151438  | <b>0,3614745</b> | 1581 | 2357 | <b>1969</b>   |
| DSG3      | 0,714447  | 0,008667  | <b>0,361557</b>  | 2451 | 2668 | <b>2559,5</b> |
| PHF10     | 0,503409  | 0,219903  | <b>0,361656</b>  | 1920 | 2416 | <b>2168</b>   |
| SLC6A17   | -0,572447 | 1,297088  | <b>0,3623205</b> | 2090 | 2220 | <b>2155</b>   |
| ARHGEF10  | -0,153935 | 0,878595  | <b>0,36233</b>   | 1548 | 1645 | <b>1596,5</b> |
| NUP54     | -0,032499 | 0,757439  | <b>0,36247</b>   | 1269 | 1598 | <b>1433,5</b> |
| STX10     | 0,36257   | NaN       | <b>0,36257</b>   | 1578 | NaN  | <b>1578</b>   |
| AVL9      | 1,062269  | -0,337012 | <b>0,3626285</b> | 1991 | 2879 | <b>2435</b>   |
| BPIFB3    | 0,992788  | -0,267017 | <b>0,3628855</b> | 1692 | 2329 | <b>2010,5</b> |
| C7orf66   | -0,039856 | 0,766462  | <b>0,363303</b>  | 1395 | 2219 | <b>1807</b>   |
| PDE12     | 0,363325  | NaN       | <b>0,363325</b>  | 1481 | NaN  | <b>1481</b>   |
| CYP2C9    | -0,330975 | 1,057691  | <b>0,363358</b>  | 1786 | 2746 | <b>2266</b>   |
| AACS      | 0,062383  | 0,664705  | <b>0,363544</b>  | 1829 | 2049 | <b>1939</b>   |
| CERS5     | -0,149204 | 0,876603  | <b>0,3636995</b> | 1729 | 2214 | <b>1971,5</b> |
| PUM2      | -0,198681 | 0,926407  | <b>0,363863</b>  | 1964 | 2222 | <b>2093</b>   |
| CERS2     | 0,238145  | 0,48999   | <b>0,3640675</b> | 2268 | 2244 | <b>2256</b>   |
| CASZ1     | 0,364324  | NaN       | <b>0,364324</b>  | 1528 | NaN  | <b>1528</b>   |
| TRIM5     | 0,70564   | 0,02321   | <b>0,364425</b>  | 1780 | 2210 | <b>1995</b>   |
| WHSC1     | 0,386009  | 0,342849  | <b>0,364429</b>  | 1719 | 2320 | <b>2019,5</b> |
| PRODH2    | 0,561071  | 0,168309  | <b>0,36469</b>   | 1617 | 2169 | <b>1893</b>   |
| STX18     | 0,710937  | 0,018681  | <b>0,364809</b>  | 1472 | 2030 | <b>1751</b>   |
| DUSP15    | 0,007102  | 0,72326   | <b>0,365181</b>  | 1269 | 1713 | <b>1491</b>   |
| SLC39A7   | 0,365229  | NaN       | <b>0,365229</b>  | 1864 | NaN  | <b>1864</b>   |
| RPS4Y1    | 0,365251  | NaN       | <b>0,365251</b>  | 915  | NaN  | <b>915</b>    |
| GANC      | 0,955407  | -0,224856 | <b>0,3652755</b> | 1886 | 2327 | <b>2106,5</b> |
| CACNG4    | 0,420636  | 0,310168  | <b>0,365402</b>  | 1180 | 1791 | <b>1485,5</b> |
| AIP       | 0,836865  | -0,105949 | <b>0,365458</b>  | 1598 | 1589 | <b>1593,5</b> |



|          |           |           |                  |      |      |               |
|----------|-----------|-----------|------------------|------|------|---------------|
| SOX3     | 0,522197  | 0,208822  | <b>0,3655095</b> | 2224 | 2518 | <b>2371</b>   |
| G3BP1    | 1,311979  | -0,58056  | <b>0,3657095</b> | 1510 | 1900 | <b>1705</b>   |
| PPM1E    | 0,952494  | -0,219998 | <b>0,366248</b>  | 1770 | 2341 | <b>2055,5</b> |
| DECR1    | 0,108458  | 0,624363  | <b>0,3664105</b> | 2113 | 3084 | <b>2598,5</b> |
| STK31    | 0,506813  | 0,226018  | <b>0,3664155</b> | 2268 | 2039 | <b>2153,5</b> |
| JAG1     | 0,370869  | 0,362311  | <b>0,36659</b>   | 863  | 1167 | <b>1015</b>   |
| VAV1     | -0,082895 | 0,816148  | <b>0,3666265</b> | 1963 | 2071 | <b>2017</b>   |
| SCRT2    | 0,366782  | NaN       | <b>0,366782</b>  | 1777 | NaN  | <b>1777</b>   |
| USP38    | 0,864369  | -0,130734 | <b>0,3668175</b> | 1697 | 2204 | <b>1950,5</b> |
| PIGX     | 0,261402  | 0,472251  | <b>0,3668265</b> | 1922 | 2077 | <b>1999,5</b> |
| INSL4    | 1,4892    | -0,755219 | <b>0,3669905</b> | 1593 | 1877 | <b>1735</b>   |
| HDAC5    | 0,201792  | 0,532396  | <b>0,367094</b>  | 1194 | 1506 | <b>1350</b>   |
| MPI      | 0,189903  | 0,544408  | <b>0,3671555</b> | 1063 | 1928 | <b>1495,5</b> |
| AOAH     | 0,151437  | 0,583581  | <b>0,367509</b>  | 1891 | 2809 | <b>2350</b>   |
| CBLN1    | 0,367784  | NaN       | <b>0,367784</b>  | 1779 | NaN  | <b>1779</b>   |
| STRBP    | 0,698648  | 0,036921  | <b>0,3677845</b> | 1705 | 1694 | <b>1699,5</b> |
| PKIA     | 0,741571  | -0,005961 | <b>0,367805</b>  | 1904 | 2038 | <b>1971</b>   |
| SSPN     | 0,36811   | NaN       | <b>0,36811</b>   | 1397 | NaN  | <b>1397</b>   |
| FGF23    | 0,317169  | 0,41918   | <b>0,3681745</b> | 2164 | 2724 | <b>2444</b>   |
| RPS18    | 2,444758  | -1,708399 | <b>0,3681795</b> | 1113 | 1760 | <b>1436,5</b> |
| FOLR4    | 0,326887  | 0,40955   | <b>0,3682185</b> | 1333 | 2017 | <b>1675</b>   |
| DR1      | 0,350354  | 0,386141  | <b>0,3682475</b> | 1484 | 2253 | <b>1868,5</b> |
| SAMD11   | 0,36838   | NaN       | <b>0,36838</b>   | 1527 | NaN  | <b>1527</b>   |
| EXOG     | 0,630775  | 0,106244  | <b>0,3685095</b> | 1205 | 1799 | <b>1502</b>   |
| KIAA1841 | -0,021985 | 0,759247  | <b>0,368631</b>  | 2041 | 2207 | <b>2124</b>   |
| FAM98C   | 1,436671  | -0,699324 | <b>0,3686735</b> | 1571 | 2621 | <b>2096</b>   |
| TREML4   | -0,013005 | 0,750374  | <b>0,3686845</b> | 2294 | 2790 | <b>2542</b>   |
| ABCA7    | -0,096616 | 0,83407   | <b>0,368727</b>  | 1846 | 2055 | <b>1950,5</b> |
| IMP3     | -0,364061 | 1,101754  | <b>0,3688465</b> | 1130 | 1425 | <b>1277,5</b> |
| CATSPER4 | 0,429916  | 0,308009  | <b>0,3689625</b> | 1599 | 2130 | <b>1864,5</b> |
| ZNF746   | 0,116508  | 0,621488  | <b>0,368998</b>  | 1431 | 1262 | <b>1346,5</b> |
| COX17    | 0,427788  | 0,310305  | <b>0,3690465</b> | 1153 | 1622 | <b>1387,5</b> |
| PRR24    | 1,071282  | -0,332762 | <b>0,36926</b>   | 1673 | 1838 | <b>1755,5</b> |
| MBD2     | 0,103091  | 0,636137  | <b>0,369614</b>  | 1637 | 3091 | <b>2364</b>   |

|         |           |           |                  |      |      |               |
|---------|-----------|-----------|------------------|------|------|---------------|
| ZNF449  | 0,544806  | 0,195001  | <b>0,3699035</b> | 1341 | 1995 | <b>1668</b>   |
| MMGT1   | -0,147479 | 0,887903  | <b>0,370212</b>  | 785  | 1531 | <b>1158</b>   |
| PNRC1   | 0,370571  | NaN       | <b>0,370571</b>  | 1638 | NaN  | <b>1638</b>   |
| AHSA2   | 0,370633  | NaN       | <b>0,370633</b>  | 1768 | NaN  | <b>1768</b>   |
| AP3B1   | 0,283967  | 0,45875   | <b>0,3713585</b> | 1945 | 2096 | <b>2020,5</b> |
| TCIRG1  | 0,186337  | 0,556636  | <b>0,3714865</b> | 1550 | 2527 | <b>2038,5</b> |
| KCNE1L  | 0,127915  | 0,615344  | <b>0,3716295</b> | 1541 | 2185 | <b>1863</b>   |
| CDH5    | 0,373153  | 0,370154  | <b>0,3716535</b> | 1799 | 1936 | <b>1867,5</b> |
| B4GALT1 | 0,565064  | 0,178271  | <b>0,3716675</b> | 1610 | 1786 | <b>1698</b>   |
| GXYLT2  | 0,371669  | NaN       | <b>0,371669</b>  | 1811 | NaN  | <b>1811</b>   |
| FAM71C  | 0,371742  | NaN       | <b>0,371742</b>  | 1543 | NaN  | <b>1543</b>   |
| ZC3H12A | -0,299521 | 1,043153  | <b>0,371816</b>  | 1810 | 2443 | <b>2126,5</b> |
| RUNX1T1 | 0,132441  | 0,611364  | <b>0,3719025</b> | 1008 | 2474 | <b>1741</b>   |
| SRGAP1  | 0,859049  | -0,114279 | <b>0,372385</b>  | 2046 | 2026 | <b>2036</b>   |
| TMEM40  | 0,372402  | NaN       | <b>0,372402</b>  | 1879 | NaN  | <b>1879</b>   |
| BCAR1   | -0,228271 | 0,973588  | <b>0,3726585</b> | 1260 | 1757 | <b>1508,5</b> |
| TFDP1   | 1,238306  | -0,492484 | <b>0,372911</b>  | 1108 | 1104 | <b>1106</b>   |
| GSTA5   | 0,567795  | 0,178196  | <b>0,3729955</b> | 1728 | 1959 | <b>1843,5</b> |
| TNFRSF9 | 0,704879  | 0,04201   | <b>0,3734445</b> | 1916 | 2328 | <b>2122</b>   |
| CHST1   | -0,087694 | 0,834804  | <b>0,373555</b>  | 1425 | 1893 | <b>1659</b>   |
| FOXG1   | NaN       | 0,373705  | <b>0,373705</b>  | NaN  | 2196 | <b>2196</b>   |
| TAL1    | 1,068518  | -0,321094 | <b>0,373712</b>  | 920  | 1574 | <b>1247</b>   |
| IL11    | 0,336833  | 0,410724  | <b>0,3737785</b> | 1375 | 1600 | <b>1487,5</b> |
| TSPAN33 | 0,373894  | NaN       | <b>0,373894</b>  | 2159 | NaN  | <b>2159</b>   |
| TMEM71  | 0,373906  | NaN       | <b>0,373906</b>  | 1499 | NaN  | <b>1499</b>   |
| DPYSL2  | -0,136683 | 0,885213  | <b>0,374265</b>  | 1807 | 1971 | <b>1889</b>   |
| VIPR2   | 0,374337  | NaN       | <b>0,374337</b>  | 1558 | NaN  | <b>1558</b>   |
| GAP43   | -0,17016  | 0,918834  | <b>0,374337</b>  | 1911 | 2434 | <b>2172,5</b> |
| LRCH4   | 0,973744  | -0,224473 | <b>0,3746355</b> | 1470 | 1570 | <b>1520</b>   |
| TACC3   | -0,674952 | 1,424224  | <b>0,374636</b>  | 1309 | 1410 | <b>1359,5</b> |
| PIP5KL1 | 0,410135  | 0,339164  | <b>0,3746495</b> | 1440 | 1431 | <b>1435,5</b> |
| CHSY1   | 0,015854  | 0,733462  | <b>0,374658</b>  | 1526 | 1766 | <b>1646</b>   |
| FCRL1   | 0,374983  | NaN       | <b>0,374983</b>  | 1731 | NaN  | <b>1731</b>   |
| FOXR2   | 0,160122  | 0,590039  | <b>0,3750805</b> | 2070 | 1972 | <b>2021</b>   |

|           |           |           |                  |      |      |               |
|-----------|-----------|-----------|------------------|------|------|---------------|
| CCT2      | 0,1329    | 0,617309  | <b>0,3751045</b> | 1419 | 1835 | <b>1627</b>   |
| RNF149    | 0,158573  | 0,591747  | <b>0,37516</b>   | 2216 | 2363 | <b>2289,5</b> |
| LYST      | 0,792673  | -0,042206 | <b>0,3752335</b> | 1930 | 3011 | <b>2470,5</b> |
| APBB1IP   | 0,251921  | 0,498553  | <b>0,375237</b>  | 1830 | 2782 | <b>2306</b>   |
| ZNF157    | 0,920308  | -0,169767 | <b>0,3752705</b> | 1465 | 1822 | <b>1643,5</b> |
| CNTNAP1   | 0,838404  | -0,08746  | <b>0,375472</b>  | 1968 | 2724 | <b>2346</b>   |
| PPCS      | 0,584775  | 0,167464  | <b>0,3761195</b> | 1510 | 1900 | <b>1705</b>   |
| DHX33     | -0,058441 | 0,810853  | <b>0,376206</b>  | 1683 | 2381 | <b>2032</b>   |
| SEC22C    | 0,376243  | NaN       | <b>0,376243</b>  | 1479 | NaN  | <b>1479</b>   |
| RASGRP2   | 0,264694  | 0,489017  | <b>0,3768555</b> | 1282 | 1363 | <b>1322,5</b> |
| ACOX2     | 0,538465  | 0,215285  | <b>0,376875</b>  | 1884 | 2983 | <b>2433,5</b> |
| GTSF1     | 0,376972  | NaN       | <b>0,376972</b>  | 1394 | NaN  | <b>1394</b>   |
| C1orf43   | 0,377296  | NaN       | <b>0,377296</b>  | 1492 | NaN  | <b>1492</b>   |
| TMEM194A  | 0,804465  | -0,049711 | <b>0,377377</b>  | 1374 | 1885 | <b>1629,5</b> |
| RNF157    | 1,033185  | -0,278043 | <b>0,377571</b>  | 1473 | 2354 | <b>1913,5</b> |
| GLDN      | 0,377881  | NaN       | <b>0,377881</b>  | 1683 | NaN  | <b>1683</b>   |
| UBE2G1    | 0,568489  | 0,187735  | <b>0,378112</b>  | 1630 | 2629 | <b>2129,5</b> |
| KLHDC1    | 0,656754  | 0,100327  | <b>0,3785405</b> | 1813 | 2237 | <b>2025</b>   |
| TMEM39B   | 0,378723  | NaN       | <b>0,378723</b>  | 1560 | NaN  | <b>1560</b>   |
| B3GAT3    | 0,658655  | 0,099022  | <b>0,3788385</b> | 1657 | 2322 | <b>1989,5</b> |
| RPRD1B    | 0,104734  | 0,653434  | <b>0,379084</b>  | 1425 | 1797 | <b>1611</b>   |
| UPK3A     | 0,702845  | 0,05545   | <b>0,3791475</b> | 1689 | 2012 | <b>1850,5</b> |
| TSPAN12   | 0,193911  | 0,564432  | <b>0,3791715</b> | 2073 | 2108 | <b>2090,5</b> |
| PDE6B     | 0,236991  | 0,521368  | <b>0,3791795</b> | 1565 | 2528 | <b>2046,5</b> |
| ILDRI     | 0,363959  | 0,394619  | <b>0,379289</b>  | 1385 | 2398 | <b>1891,5</b> |
| ITGB1BP3  | 0,379441  | NaN       | <b>0,379441</b>  | 1173 | NaN  | <b>1173</b>   |
| CLDN15    | 0,379534  | NaN       | <b>0,379534</b>  | 1480 | NaN  | <b>1480</b>   |
| LOC389834 | -0,171658 | 0,930992  | <b>0,379667</b>  | 2014 | 2176 | <b>2095</b>   |
| KIAA0101  | 0,379693  | NaN       | <b>0,379693</b>  | 1631 | NaN  | <b>1631</b>   |
| NAPB      | 0,821227  | -0,061748 | <b>0,3797395</b> | 1689 | 1756 | <b>1722,5</b> |
| GPR161    | 0,380017  | NaN       | <b>0,380017</b>  | 1683 | NaN  | <b>1683</b>   |
| OSGIN1    | 0,380429  | NaN       | <b>0,380429</b>  | 1522 | NaN  | <b>1522</b>   |
| ZNF213    | -0,402433 | 1,16338   | <b>0,3804735</b> | 1637 | 1901 | <b>1769</b>   |
| CRYBG3    | 0,422061  | 0,33938   | <b>0,3807205</b> | 1398 | 2228 | <b>1813</b>   |

|          |           |           |                  |      |      |               |
|----------|-----------|-----------|------------------|------|------|---------------|
| DDX42    | 0,497776  | 0,263704  | <b>0,38074</b>   | 1025 | 1839 | <b>1432</b>   |
| EIF2B4   | 0,517793  | 0,244445  | <b>0,381119</b>  | 943  | 1894 | <b>1418,5</b> |
| CENPM    | 0,381214  | NaN       | <b>0,381214</b>  | 1501 | NaN  | <b>1501</b>   |
| LDHA     | 0,709806  | 0,052848  | <b>0,381327</b>  | 2124 | 2177 | <b>2150,5</b> |
| TRIM66   | -0,276748 | 1,039849  | <b>0,3815505</b> | 1465 | 1876 | <b>1670,5</b> |
| C18orf21 | 0,381639  | NaN       | <b>0,381639</b>  | 1910 | NaN  | <b>1910</b>   |
| LNP1     | 0,325434  | 0,438343  | <b>0,3818885</b> | 1619 | 1396 | <b>1507,5</b> |
| FZD2     | 0,382004  | NaN       | <b>0,382004</b>  | 1563 | NaN  | <b>1563</b>   |
| GAB3     | 0,271016  | 0,493112  | <b>0,382064</b>  | 850  | 1436 | <b>1143</b>   |
| CD52     | -0,184375 | 0,948694  | <b>0,3821595</b> | 1546 | 1523 | <b>1534,5</b> |
| AP3M1    | 0,38228   | NaN       | <b>0,38228</b>   | 2131 | NaN  | <b>2131</b>   |
| FGF17    | 0,20631   | 0,559036  | <b>0,382673</b>  | 1446 | 2078 | <b>1762</b>   |
| NAGS     | 1,318336  | -0,552566 | <b>0,382885</b>  | 1676 | 2172 | <b>1924</b>   |
| SRCIN1   | 0,553537  | 0,213106  | <b>0,3833215</b> | 1402 | 2045 | <b>1723,5</b> |
| TBC1D25  | 0,383354  | NaN       | <b>0,383354</b>  | 1601 | NaN  | <b>1601</b>   |
| TAS2R5   | 0,746796  | 0,019943  | <b>0,3833695</b> | 1337 | 1760 | <b>1548,5</b> |
| PCDHB2   | 0,012523  | 0,754489  | <b>0,383506</b>  | 1959 | 2239 | <b>2099</b>   |
| VWA5A    | 0,003958  | 0,763745  | <b>0,3838515</b> | 1831 | 2905 | <b>2368</b>   |
| RING1    | -0,084817 | 0,852527  | <b>0,383855</b>  | 1722 | 2181 | <b>1951,5</b> |
| FAM55C   | 0,718851  | 0,04903   | <b>0,3839405</b> | 1600 | 1919 | <b>1759,5</b> |
| PSMA7    | 0,92925   | -0,16125  | <b>0,384</b>     | 1048 | 1505 | <b>1276,5</b> |
| HAT1     | NaN       | 0,384231  | <b>0,384231</b>  | NaN  | 3083 | <b>3083</b>   |
| FXN      | 0,099763  | 0,668802  | <b>0,3842825</b> | 1798 | 2225 | <b>2011,5</b> |
| SCRN2    | -0,152932 | 0,922001  | <b>0,3845345</b> | 1510 | 1092 | <b>1301</b>   |
| SNRNP48  | 0,329123  | 0,440214  | <b>0,3846685</b> | 1795 | 2025 | <b>1910</b>   |
| FBXO43   | 0,109289  | 0,66049   | <b>0,3848895</b> | 1168 | 2399 | <b>1783,5</b> |
| ASXL1    | 0,918881  | -0,149017 | <b>0,384932</b>  | 2393 | 2362 | <b>2377,5</b> |
| TSTD1    | 0,982806  | -0,212874 | <b>0,384966</b>  | 1239 | 2356 | <b>1797,5</b> |
| KRTAP5-1 | -0,686467 | 1,456957  | <b>0,385245</b>  | 1389 | 1366 | <b>1377,5</b> |
| PM20D1   | 0,271031  | 0,499933  | <b>0,385482</b>  | 1579 | 2300 | <b>1939,5</b> |
| A4GALT   | 0,442399  | 0,328931  | <b>0,385665</b>  | 2315 | 2470 | <b>2392,5</b> |
| C14orf37 | 0,763077  | 0,008256  | <b>0,3856665</b> | 1486 | 1897 | <b>1691,5</b> |
| GMPS     | 0,104898  | 0,666473  | <b>0,3856855</b> | 1127 | 2020 | <b>1573,5</b> |
| AMOTL1   | -0,395682 | 1,167093  | <b>0,3857055</b> | 1710 | 2608 | <b>2159</b>   |

|          |           |           |                  |      |      |               |
|----------|-----------|-----------|------------------|------|------|---------------|
| ZCCHC7   | 0,198276  | 0,573352  | <b>0,385814</b>  | 1615 | 2134 | <b>1874,5</b> |
| ZMPSTE24 | 0,569911  | 0,202336  | <b>0,3861235</b> | 2047 | 2355 | <b>2201</b>   |
| ZNF502   | 1,235211  | -0,462658 | <b>0,3862765</b> | 1698 | 2081 | <b>1889,5</b> |
| NLRX1    | 0,619129  | 0,153635  | <b>0,386382</b>  | 1432 | 2179 | <b>1805,5</b> |
| GNS      | 0,570086  | 0,203096  | <b>0,386591</b>  | 1938 | 1851 | <b>1894,5</b> |
| BABAM1   | -0,584323 | 1,357548  | <b>0,3866125</b> | 1737 | 2440 | <b>2088,5</b> |
| MYO1D    | 0,386767  | NaN       | <b>0,386767</b>  | 1667 | NaN  | <b>1667</b>   |
| ARL3     | 0,154915  | 0,618931  | <b>0,386923</b>  | 1811 | 2718 | <b>2264,5</b> |
| POLR2K   | 0,915639  | -0,141457 | <b>0,387091</b>  | 1468 | 1934 | <b>1701</b>   |
| NSL1     | 0,101719  | 0,672644  | <b>0,3871815</b> | 1326 | 1478 | <b>1402</b>   |
| PRELID2  | -0,313224 | 1,087798  | <b>0,387287</b>  | 1654 | 1921 | <b>1787,5</b> |
| CACNB3   | 0,64135   | 0,133519  | <b>0,3874345</b> | 1531 | 2708 | <b>2119,5</b> |
| BMS1     | 1,19927   | -0,424213 | <b>0,3875285</b> | 1780 | 1833 | <b>1806,5</b> |
| HMG20A   | 0,187668  | 0,587447  | <b>0,3875575</b> | 1813 | 1953 | <b>1883</b>   |
| INSL3    | 0,233668  | 0,541507  | <b>0,3875875</b> | 2003 | 2886 | <b>2444,5</b> |
| C1orf87  | 1,26986   | -0,494566 | <b>0,387647</b>  | 1598 | 2187 | <b>1892,5</b> |
| TTK      | 0,113853  | 0,661702  | <b>0,3877775</b> | 1769 | 1628 | <b>1698,5</b> |
| ZCWPW2   | 0,152514  | 0,623065  | <b>0,3877895</b> | 1830 | 1921 | <b>1875,5</b> |
| OGT      | 0,280084  | 0,49557   | <b>0,387827</b>  | 1500 | 2075 | <b>1787,5</b> |
| LACE1    | 0,588885  | 0,186946  | <b>0,3879155</b> | 1858 | 2048 | <b>1953</b>   |
| SNRPB    | 0,538722  | 0,238106  | <b>0,388414</b>  | 917  | 865  | <b>891</b>    |
| C6orf106 | 0,529557  | 0,247555  | <b>0,388556</b>  | 1232 | 1534 | <b>1383</b>   |
| TFF1     | 0,322654  | 0,454794  | <b>0,388724</b>  | 684  | 1367 | <b>1025,5</b> |
| LMO2     | 0,614749  | 0,162897  | <b>0,388823</b>  | 1392 | 2740 | <b>2066</b>   |
| OR51D1   | 0,12952   | 0,648999  | <b>0,3892595</b> | 1552 | 2069 | <b>1810,5</b> |
| PCDHGB7  | 0,720124  | 0,059038  | <b>0,389581</b>  | 1852 | 2320 | <b>2086</b>   |
| H1FNT    | 0,389832  | NaN       | <b>0,389832</b>  | 1646 | NaN  | <b>1646</b>   |
| PIGU     | 0,706439  | 0,073229  | <b>0,389834</b>  | 1674 | 2195 | <b>1934,5</b> |
| MTL5     | 0,389883  | NaN       | <b>0,389883</b>  | 1754 | NaN  | <b>1754</b>   |
| AAMP     | 0,371384  | 0,408384  | <b>0,389884</b>  | 1843 | 1571 | <b>1707</b>   |
| INSL6    | 0,087261  | 0,693115  | <b>0,390188</b>  | 1842 | 1923 | <b>1882,5</b> |
| MASP2    | 0,625467  | 0,154992  | <b>0,3902295</b> | 1385 | 2038 | <b>1711,5</b> |
| PPP4R1   | 0,949192  | -0,16859  | <b>0,390301</b>  | 1617 | 2495 | <b>2056</b>   |
| DDX49    | 0,451747  | 0,329824  | <b>0,3907855</b> | 1749 | 2998 | <b>2373,5</b> |

|          |           |           |                  |      |      |               |
|----------|-----------|-----------|------------------|------|------|---------------|
| ZNF639   | 0,701787  | 0,080141  | <b>0,390964</b>  | 1482 | 1845 | <b>1663,5</b> |
| AR SJ    | 0,315043  | 0,467     | <b>0,3910215</b> | 1428 | 2065 | <b>1746,5</b> |
| ACTR6    | 0,391035  | NaN       | <b>0,391035</b>  | 1601 | NaN  | <b>1601</b>   |
| LGALS4   | 0,846755  | -0,064648 | <b>0,3910535</b> | 1112 | 2497 | <b>1804,5</b> |
| OLAH     | NaN       | 0,391122  | <b>0,391122</b>  | NaN  | 2108 | <b>2108</b>   |
| FIGN     | 1,850573  | -1,068174 | <b>0,3911995</b> | 1138 | 1388 | <b>1263</b>   |
| IL12A    | 0,391232  | NaN       | <b>0,391232</b>  | 2454 | NaN  | <b>2454</b>   |
| SSH3     | 0,68425   | 0,098395  | <b>0,3913225</b> | 1218 | 2085 | <b>1651,5</b> |
| AFMID    | 0,545196  | 0,237457  | <b>0,3913265</b> | 1463 | 1697 | <b>1580</b>   |
| SLC16A11 | 1,421497  | -0,638555 | <b>0,391471</b>  | 1892 | 1639 | <b>1765,5</b> |
| SLC9A11  | 0,544668  | 0,238347  | <b>0,3915075</b> | 1378 | 1472 | <b>1425</b>   |
| PWP1     | 1,073927  | -0,290712 | <b>0,3916075</b> | 1711 | 1412 | <b>1561,5</b> |
| NUBP2    | 0,360054  | 0,423975  | <b>0,3920145</b> | 1683 | 2184 | <b>1933,5</b> |
| FAM20A   | 0,545455  | 0,238701  | <b>0,392078</b>  | 1373 | 1861 | <b>1617</b>   |
| WDR44    | 0,392156  | NaN       | <b>0,392156</b>  | 2277 | NaN  | <b>2277</b>   |
| EARS2    | 0,392384  | NaN       | <b>0,392384</b>  | 1800 | NaN  | <b>1800</b>   |
| CREB3L2  | 0,383316  | 0,40172   | <b>0,392518</b>  | 1476 | 2032 | <b>1754</b>   |
| PNMAL2   | -1,62743  | 2,412552  | <b>0,392561</b>  | 1574 | 1836 | <b>1705</b>   |
| ELK3     | 0,566861  | 0,218603  | <b>0,392732</b>  | 1927 | 1808 | <b>1867,5</b> |
| TNFRSF17 | 0,827636  | -0,041756 | <b>0,39294</b>   | 1337 | 1869 | <b>1603</b>   |
| NQO1     | NaN       | 0,393069  | <b>0,393069</b>  | NaN  | 2184 | <b>2184</b>   |
| CORO1C   | 1,321918  | -0,535497 | <b>0,3932105</b> | 1483 | 2223 | <b>1853</b>   |
| HACE1    | 0,662846  | 0,12395   | <b>0,393398</b>  | 1750 | 2629 | <b>2189,5</b> |
| LILRB1   | 0,395999  | 0,391087  | <b>0,393543</b>  | 1468 | 1925 | <b>1696,5</b> |
| MAP3K14  | 0,80329   | -0,016095 | <b>0,3935975</b> | 2182 | 1834 | <b>2008</b>   |
| SCN5A    | 0,170294  | 0,616909  | <b>0,3936015</b> | 1702 | 2682 | <b>2192</b>   |
| TMC4     | 1,079664  | -0,292452 | <b>0,393606</b>  | 1604 | 2409 | <b>2006,5</b> |
| JUND     | 0,965254  | -0,178039 | <b>0,3936075</b> | 1126 | 2423 | <b>1774,5</b> |
| KANK2    | 0,611298  | 0,17613   | <b>0,393714</b>  | 1641 | 2233 | <b>1937</b>   |
| ID4      | NaN       | 0,393777  | <b>0,393777</b>  | NaN  | 2189 | <b>2189</b>   |
| C19orf48 | 0,636768  | 0,150941  | <b>0,3938545</b> | 1418 | 1439 | <b>1428,5</b> |
| ATP12A   | -0,019773 | 0,808105  | <b>0,394166</b>  | 1616 | 1868 | <b>1742</b>   |
| NPAS1    | 0,408181  | 0,380245  | <b>0,394213</b>  | 1905 | 3099 | <b>2502</b>   |
| RAB8A    | 0,851968  | -0,063514 | <b>0,394227</b>  | 1774 | 1874 | <b>1824</b>   |

|          |           |           |                  |      |      |               |
|----------|-----------|-----------|------------------|------|------|---------------|
| SLC38A6  | 1,142803  | -0,353376 | <b>0,3947135</b> | 1648 | 1891 | <b>1769,5</b> |
| FMOD     | -0,100082 | 0,889694  | <b>0,394806</b>  | 532  | 825  | <b>678,5</b>  |
| PARVG    | -0,508642 | 1,298417  | <b>0,3948875</b> | 1134 | 1762 | <b>1448</b>   |
| SAMD4B   | 0,395252  | NaN       | <b>0,395252</b>  | 1665 | NaN  | <b>1665</b>   |
| EIF3D    | 1,476378  | -0,685798 | <b>0,39529</b>   | 1638 | 2439 | <b>2038,5</b> |
| GPX6     | 0,871458  | -0,080621 | <b>0,3954185</b> | 1550 | 2094 | <b>1822</b>   |
| BRMS1L   | 0,757381  | 0,033536  | <b>0,3954585</b> | 1761 | 2067 | <b>1914</b>   |
| SERPINI1 | 0,144195  | 0,647521  | <b>0,395858</b>  | 1701 | 2221 | <b>1961</b>   |
| DPCD     | 0,396077  | NaN       | <b>0,396077</b>  | 1638 | NaN  | <b>1638</b>   |
| OR5H14   | 0,753341  | 0,03899   | <b>0,3961655</b> | 1514 | 2220 | <b>1867</b>   |
| MXD1     | -0,348304 | 1,140643  | <b>0,3961695</b> | 1556 | 2358 | <b>1957</b>   |
| SLC25A36 | NaN       | 0,396218  | <b>0,396218</b>  | NaN  | 2826 | <b>2826</b>   |
| FNDC3A   | 0,749779  | 0,043253  | <b>0,396516</b>  | 2193 | 2456 | <b>2324,5</b> |
| FRYL     | 0,484272  | 0,309086  | <b>0,396679</b>  | 1624 | 2015 | <b>1819,5</b> |
| TMPRSS6  | 1,292371  | -0,498616 | <b>0,3968775</b> | 994  | 1460 | <b>1227</b>   |
| GRB7     | 0,127414  | 0,666382  | <b>0,396898</b>  | 1507 | 1732 | <b>1619,5</b> |
| GRIN3B   | -0,000288 | 0,794364  | <b>0,397038</b>  | 1277 | 2090 | <b>1683,5</b> |
| FSD1     | 0,397167  | NaN       | <b>0,397167</b>  | 1582 | NaN  | <b>1582</b>   |
| GLA      | 1,319675  | -0,52504  | <b>0,3973175</b> | 1729 | 2737 | <b>2233</b>   |
| CHRA1    | 0,631381  | 0,163274  | <b>0,3973275</b> | 1358 | 1965 | <b>1661,5</b> |
| SPATA5L1 | 1,799608  | -1,004774 | <b>0,397417</b>  | 1156 | 2162 | <b>1659</b>   |
| NAA60    | 0,119342  | 0,67551   | <b>0,397426</b>  | 1987 | 2199 | <b>2093</b>   |
| RAC3     | -0,083844 | 0,878718  | <b>0,397437</b>  | 1710 | 1743 | <b>1726,5</b> |
| MYO5B    | 0,553886  | 0,241132  | <b>0,397509</b>  | 1963 | 2458 | <b>2210,5</b> |
| OR51B2   | 0,658615  | 0,137019  | <b>0,397817</b>  | 2150 | 2239 | <b>2194,5</b> |
| SLC6A20  | 0,899506  | -0,103787 | <b>0,3978595</b> | 1548 | 1570 | <b>1559</b>   |
| C8orf82  | -0,038541 | 0,834512  | <b>0,3979855</b> | 1703 | 1783 | <b>1743</b>   |
| CD200R1  | 0,940894  | -0,144785 | <b>0,3980545</b> | 1980 | 2947 | <b>2463,5</b> |
| IKZF2    | 1,284733  | -0,488241 | <b>0,398246</b>  | 1525 | 2153 | <b>1839</b>   |
| GIPC3    | -0,055188 | 0,85169   | <b>0,398251</b>  | 1509 | 1718 | <b>1613,5</b> |
| CST9     | 0,096152  | 0,701194  | <b>0,398673</b>  | 1814 | 1964 | <b>1889</b>   |
| CLEC4C   | -0,109618 | 0,906987  | <b>0,3986845</b> | 1443 | 1376 | <b>1409,5</b> |
| LRRCS9   | 0,398698  | NaN       | <b>0,398698</b>  | 1508 | NaN  | <b>1508</b>   |
| AKNAD1   | 0,399208  | NaN       | <b>0,399208</b>  | 1494 | NaN  | <b>1494</b>   |

|          |           |           |                  |      |      |               |
|----------|-----------|-----------|------------------|------|------|---------------|
| PGCP     | 0,569895  | 0,230354  | <b>0,4001245</b> | 1765 | 1309 | <b>1537</b>   |
| DYNC2LI1 | 0,400237  | NaN       | <b>0,400237</b>  | 1559 | NaN  | <b>1559</b>   |
| KRT79    | 0,706412  | 0,094264  | <b>0,400338</b>  | 1729 | 2181 | <b>1955</b>   |
| AMPH     | 0,183619  | 0,617414  | <b>0,4005165</b> | 1638 | 1769 | <b>1703,5</b> |
| ZNF512   | 0,400951  | NaN       | <b>0,400951</b>  | 1983 | NaN  | <b>1983</b>   |
| ZNF558   | -0,434115 | 1,236288  | <b>0,4010865</b> | 1312 | 1515 | <b>1413,5</b> |
| OXSR1    | 1,370811  | -0,568134 | <b>0,4013385</b> | 2201 | 1950 | <b>2075,5</b> |
| INTS8    | 0,402167  | NaN       | <b>0,402167</b>  | 1432 | NaN  | <b>1432</b>   |
| PARVB    | -0,038351 | 0,842805  | <b>0,402227</b>  | 2020 | 2650 | <b>2335</b>   |
| GPR20    | 0,596263  | 0,208456  | <b>0,4023595</b> | 1225 | 1864 | <b>1544,5</b> |
| DNAJB13  | 1,088447  | -0,283137 | <b>0,402655</b>  | 1473 | 1863 | <b>1668</b>   |
| ARID5A   | 0,372142  | 0,433214  | <b>0,402678</b>  | 1258 | 1697 | <b>1477,5</b> |
| THBS3    | 0,089937  | 0,715785  | <b>0,402861</b>  | 1134 | 1686 | <b>1410</b>   |
| RCCD1    | 0,572815  | 0,233168  | <b>0,4029915</b> | 1636 | 1935 | <b>1785,5</b> |
| OXSM     | 0,186982  | 0,619036  | <b>0,403009</b>  | 1736 | 2679 | <b>2207,5</b> |
| CSRP1    | 0,152712  | 0,653415  | <b>0,4030635</b> | 2244 | 2212 | <b>2228</b>   |
| SDK2     | 0,063072  | 0,743204  | <b>0,403138</b>  | 1866 | 2510 | <b>2188</b>   |
| PRADC1   | 0,846459  | -0,039981 | <b>0,403239</b>  | 1522 | 1868 | <b>1695</b>   |
| RRS1     | -0,049024 | 0,855947  | <b>0,4034615</b> | 1707 | 1509 | <b>1608</b>   |
| PHOSPHO1 | 0,815982  | -0,00872  | <b>0,403631</b>  | 1167 | 2252 | <b>1709,5</b> |
| LTV1     | 0,403719  | NaN       | <b>0,403719</b>  | 1464 | NaN  | <b>1464</b>   |
| AXDND1   | 0,403779  | NaN       | <b>0,403779</b>  | 1852 | NaN  | <b>1852</b>   |
| CDIPT    | 0,447082  | 0,360552  | <b>0,403817</b>  | 2061 | 2093 | <b>2077</b>   |
| MEF2A    | 0,530644  | 0,277263  | <b>0,4039535</b> | 1362 | 1897 | <b>1629,5</b> |
| ATN1     | 0,29548   | 0,512547  | <b>0,4040135</b> | 1573 | 2358 | <b>1965,5</b> |
| TXNL1    | 1,14261   | -0,334307 | <b>0,4041515</b> | 1553 | 2353 | <b>1953</b>   |
| GRB14    | 1,126048  | -0,317383 | <b>0,4043325</b> | 1397 | 2051 | <b>1724</b>   |
| CDC42BPB | 0,037553  | 0,771287  | <b>0,40442</b>   | 2319 | 2390 | <b>2354,5</b> |
| NFATC3   | 0,508181  | 0,300936  | <b>0,4045585</b> | 2331 | 2194 | <b>2262,5</b> |
| TRPC7    | -0,49072  | 1,30106   | <b>0,40517</b>   | 1383 | 2054 | <b>1718,5</b> |
| IL1RL1   | 0,369307  | 0,441198  | <b>0,4052525</b> | 1716 | 2730 | <b>2223</b>   |
| BPIFA2   | 1,042423  | -0,231738 | <b>0,4053425</b> | 1807 | 1644 | <b>1725,5</b> |
| NAALAD2  | 0,312114  | 0,498852  | <b>0,405483</b>  | 1763 | 2486 | <b>2124,5</b> |
| VGLL3    | 0,710377  | 0,100859  | <b>0,405618</b>  | 1722 | 2052 | <b>1887</b>   |



|            |           |           |                  |      |      |               |
|------------|-----------|-----------|------------------|------|------|---------------|
| NAGA       | 0,923447  | -0,11212  | <b>0,4056635</b> | 1431 | 2186 | <b>1808,5</b> |
| DDI1       | 0,734661  | 0,077154  | <b>0,4059075</b> | 1203 | 1407 | <b>1305</b>   |
| FAM131C    | 0,036701  | 0,775647  | <b>0,406174</b>  | 1712 | 1773 | <b>1742,5</b> |
| CDKAL1     | 0,920345  | -0,107667 | <b>0,406339</b>  | 1531 | 1400 | <b>1465,5</b> |
| TMEM19     | 1,141372  | -0,328693 | <b>0,4063395</b> | 1561 | 1703 | <b>1632</b>   |
| TLK2       | 1,012063  | -0,199202 | <b>0,4064305</b> | 1587 | 2131 | <b>1859</b>   |
| HTATSF1    | -0,05275  | 0,865859  | <b>0,4065545</b> | 1557 | 1703 | <b>1630</b>   |
| PDE8B      | -0,145238 | 0,958919  | <b>0,4068405</b> | 1385 | 2292 | <b>1838,5</b> |
| ICAM1      | 0,277828  | 0,53587   | <b>0,406849</b>  | 1017 | 1630 | <b>1323,5</b> |
| FKBPL      | 0,40715   | NaN       | <b>0,40715</b>   | 1196 | NaN  | <b>1196</b>   |
| LINC00482  | 0,790231  | 0,024177  | <b>0,407204</b>  | 1710 | 2287 | <b>1998,5</b> |
| FRAT1      | NaN       | 0,407322  | <b>0,407322</b>  | NaN  | 2935 | <b>2935</b>   |
| SCGB1D4    | 0,818382  | -0,003653 | <b>0,4073645</b> | 1299 | 2258 | <b>1778,5</b> |
| OAS2       | 1,533322  | -0,718079 | <b>0,4076215</b> | 1375 | 2411 | <b>1893</b>   |
| CYP27B1    | 0,584798  | 0,230849  | <b>0,4078235</b> | 1937 | 2707 | <b>2322</b>   |
| ICOS       | -0,474487 | 1,290699  | <b>0,408106</b>  | 1198 | 2042 | <b>1620</b>   |
| CTSK       | 0,201005  | 0,615248  | <b>0,4081265</b> | 1778 | 2048 | <b>1913</b>   |
| KLHDC8A    | 0,085128  | 0,731321  | <b>0,4082245</b> | 1499 | 2040 | <b>1769,5</b> |
| REEP1      | 0,229371  | 0,587384  | <b>0,4083775</b> | 1524 | 1728 | <b>1626</b>   |
| PRDM15     | 1,317417  | -0,50047  | <b>0,4084735</b> | 1463 | 1627 | <b>1545</b>   |
| SIGLEC5    | 1,165675  | -0,348403 | <b>0,408636</b>  | 1481 | 1782 | <b>1631,5</b> |
| FRMD8      | -0,008014 | 0,825607  | <b>0,4087965</b> | 1387 | 1989 | <b>1688</b>   |
| TNFSF11    | -0,2332   | 1,050856  | <b>0,408828</b>  | 1618 | 2423 | <b>2020,5</b> |
| SEC61A2    | 0,647128  | 0,170702  | <b>0,408915</b>  | 1865 | 2377 | <b>2121</b>   |
| MAFF       | 0,305813  | 0,512201  | <b>0,409007</b>  | 1485 | 1920 | <b>1702,5</b> |
| OLFM2      | 0,409051  | NaN       | <b>0,409051</b>  | 1625 | NaN  | <b>1625</b>   |
| ADAM12     | 0,236041  | 0,582699  | <b>0,40937</b>   | 1909 | 1649 | <b>1779</b>   |
| DGKH       | 1,340184  | -0,521295 | <b>0,4094445</b> | 883  | 1834 | <b>1358,5</b> |
| ST6GALNAC4 | 0,434261  | 0,384806  | <b>0,4095335</b> | 1815 | 1943 | <b>1879</b>   |
| RETN       | 0,40956   | NaN       | <b>0,40956</b>   | 1789 | NaN  | <b>1789</b>   |
| ALKBH3     | -0,118845 | 0,938174  | <b>0,4096645</b> | 1759 | 2153 | <b>1956</b>   |
| TBX19      | NaN       | 0,409709  | <b>0,409709</b>  | NaN  | 2306 | <b>2306</b>   |
| TONSL      | 1,472451  | -0,652494 | <b>0,4099785</b> | 1387 | 2357 | <b>1872</b>   |
| AP3M2      | 0,410057  | NaN       | <b>0,410057</b>  | 1468 | NaN  | <b>1468</b>   |

|          |           |           |                  |      |      |               |
|----------|-----------|-----------|------------------|------|------|---------------|
| C4orf29  | -0,329673 | 1,149849  | <b>0,410088</b>  | 1782 | 2428 | <b>2105</b>   |
| C20orf79 | 0,410571  | NaN       | <b>0,410571</b>  | 1590 | NaN  | <b>1590</b>   |
| FAM8A1   | 1,348965  | -0,527751 | <b>0,410607</b>  | 1559 | 2106 | <b>1832,5</b> |
| HDAC6    | -0,051089 | 0,872471  | <b>0,410691</b>  | 1727 | 2367 | <b>2047</b>   |
| CTHRC1   | 0,865937  | -0,044398 | <b>0,4107695</b> | 1162 | 2100 | <b>1631</b>   |
| ATP10B   | 0,232997  | 0,589076  | <b>0,4110365</b> | 1521 | 2033 | <b>1777</b>   |
| ZNF45    | 0,294203  | 0,528023  | <b>0,411113</b>  | 819  | 1479 | <b>1149</b>   |
| SPINT4   | 0,036564  | 0,785905  | <b>0,4112345</b> | 1293 | 1747 | <b>1520</b>   |
| NARG2    | 0,411666  | NaN       | <b>0,411666</b>  | 2223 | NaN  | <b>2223</b>   |
| ZNF300   | 0,232581  | 0,590856  | <b>0,4117185</b> | 1482 | 1772 | <b>1627</b>   |
| NACC2    | 0,411868  | NaN       | <b>0,411868</b>  | 2117 | NaN  | <b>2117</b>   |
| SMYD2    | 0,830994  | -0,007071 | <b>0,4119615</b> | 1483 | 1985 | <b>1734</b>   |
| CLCA4    | 0,251889  | 0,572359  | <b>0,412124</b>  | 1612 | 2795 | <b>2203,5</b> |
| PIP5K1B  | 0,205327  | 0,61994   | <b>0,4126335</b> | 1660 | 1998 | <b>1829</b>   |
| CSNK1D   | 0,869667  | -0,044195 | <b>0,412736</b>  | 1505 | 1488 | <b>1496,5</b> |
| NPS      | 0,755762  | 0,069811  | <b>0,4127865</b> | 1980 | 1943 | <b>1961,5</b> |
| USP30    | 0,05744   | 0,768284  | <b>0,412862</b>  | 1772 | 1819 | <b>1795,5</b> |
| DCLK2    | -0,118107 | 0,943945  | <b>0,412919</b>  | 1888 | 2700 | <b>2294</b>   |
| ZMAT1    | 0,589942  | 0,236047  | <b>0,4129945</b> | 1299 | 2386 | <b>1842,5</b> |
| SAP30    | 1,155724  | -0,329481 | <b>0,4131215</b> | 1616 | 2715 | <b>2165,5</b> |
| TCERG1   | 0,058325  | 0,767994  | <b>0,4131595</b> | 1117 | 1910 | <b>1513,5</b> |
| GHRHR    | 0,413255  | NaN       | <b>0,413255</b>  | 1269 | NaN  | <b>1269</b>   |
| RSPO1    | 0,413422  | NaN       | <b>0,413422</b>  | 1753 | NaN  | <b>1753</b>   |
| NEK5     | -0,013396 | 0,840585  | <b>0,4135945</b> | 2026 | 1966 | <b>1996</b>   |
| ZNF709   | 0,413819  | NaN       | <b>0,413819</b>  | 1471 | NaN  | <b>1471</b>   |
| WNK3     | 0,086212  | 0,741544  | <b>0,413878</b>  | 1319 | 1314 | <b>1316,5</b> |
| TNK2     | 0,510781  | 0,31709   | <b>0,4139355</b> | 1277 | 1204 | <b>1240,5</b> |
| RALGAPB  | 0,413948  | NaN       | <b>0,413948</b>  | 1497 | NaN  | <b>1497</b>   |
| DTD1     | 0,414217  | NaN       | <b>0,414217</b>  | 1819 | NaN  | <b>1819</b>   |
| CHL1     | 0,847822  | -0,019138 | <b>0,414342</b>  | 1783 | 2087 | <b>1935</b>   |
| SAMD3    | 0,061089  | 0,767971  | <b>0,41453</b>   | 1779 | 2207 | <b>1993</b>   |
| ZNF280D  | 0,50758   | 0,32181   | <b>0,414695</b>  | 1979 | 2006 | <b>1992,5</b> |
| MSL2     | 0,186431  | 0,642993  | <b>0,414712</b>  | 1691 | 2172 | <b>1931,5</b> |
| ARX      | -0,279464 | 1,109308  | <b>0,414922</b>  | 1784 | 2103 | <b>1943,5</b> |

|          |           |           |                  |      |      |               |
|----------|-----------|-----------|------------------|------|------|---------------|
| SOX5     | 0,850678  | -0,020415 | <b>0,4151315</b> | 1311 | 1479 | <b>1395</b>   |
| SLC26A5  | 0,672513  | 0,157832  | <b>0,4151725</b> | 2007 | 2083 | <b>2045</b>   |
| HOXA5    | -1,251334 | 2,0817    | <b>0,415183</b>  | 1428 | 2449 | <b>1938,5</b> |
| ARFGAP1  | 0,669638  | 0,160922  | <b>0,41528</b>   | 1298 | 1899 | <b>1598,5</b> |
| HK1      | 0,651641  | 0,179269  | <b>0,415455</b>  | 1796 | 1827 | <b>1811,5</b> |
| ARHGAP27 | 0,65432   | 0,176689  | <b>0,4155045</b> | 1590 | 2239 | <b>1914,5</b> |
| UBE2I    | 1,005009  | -0,17348  | <b>0,4157645</b> | 1850 | 2560 | <b>2205</b>   |
| SAMM50   | 0,339737  | 0,493194  | <b>0,4164655</b> | 1730 | 2069 | <b>1899,5</b> |
| SLC5A4   | 0,094771  | 0,738483  | <b>0,416627</b>  | 1392 | 1718 | <b>1555</b>   |
| IP6K1    | -0,131625 | 0,965304  | <b>0,4168395</b> | 1232 | 1642 | <b>1437</b>   |
| UBE2Q2   | 1,119978  | -0,286275 | <b>0,4168515</b> | 1591 | 2728 | <b>2159,5</b> |
| C5       | 0,241112  | 0,59304   | <b>0,417076</b>  | 1828 | 1794 | <b>1811</b>   |
| MYBPC1   | 0,754746  | 0,079515  | <b>0,4171305</b> | 1570 | 1953 | <b>1761,5</b> |
| ZNF607   | 0,641968  | 0,192295  | <b>0,4171315</b> | 1593 | 2080 | <b>1836,5</b> |
| GGN      | 0,581802  | 0,253773  | <b>0,4177875</b> | 1513 | 2065 | <b>1789</b>   |
| BMP4     | 0,129918  | 0,705813  | <b>0,4178655</b> | 2132 | 2059 | <b>2095,5</b> |
| ACY3     | 0,846315  | -0,010551 | <b>0,417882</b>  | 2069 | 2163 | <b>2116</b>   |
| ICMT     | 0,071541  | 0,76471   | <b>0,4181255</b> | 965  | 1675 | <b>1320</b>   |
| SMCR7L   | 0,407836  | 0,428456  | <b>0,418146</b>  | 1901 | 2471 | <b>2186</b>   |
| CCDC9    | 1,660748  | -0,824318 | <b>0,418215</b>  | 1496 | 2274 | <b>1885</b>   |
| TSPEAR   | 0,866673  | -0,028989 | <b>0,418842</b>  | 1885 | 2332 | <b>2108,5</b> |
| MS4A13   | 0,851828  | -0,014122 | <b>0,418853</b>  | 1899 | 2479 | <b>2189</b>   |
| MITD1    | 1,038988  | -0,201216 | <b>0,418886</b>  | 1574 | 1789 | <b>1681,5</b> |
| SATB2    | 0,951612  | -0,113631 | <b>0,4189905</b> | 1867 | 1825 | <b>1846</b>   |
| EPHB1    | 0,827064  | 0,011565  | <b>0,4193145</b> | 1153 | 2068 | <b>1610,5</b> |
| KIAA2022 | 0,618319  | 0,220978  | <b>0,4196485</b> | 1959 | 1886 | <b>1922,5</b> |
| ZBP2     | 0,756009  | 0,083354  | <b>0,4196815</b> | 1462 | 1661 | <b>1561,5</b> |
| ANP32B   | 0,245293  | 0,595115  | <b>0,420204</b>  | 1665 | 2057 | <b>1861</b>   |
| HTRA1    | 0,741807  | 0,098693  | <b>0,42025</b>   | 1733 | 2023 | <b>1878</b>   |
| GAPT     | 0,420289  | NaN       | <b>0,420289</b>  | 1851 | NaN  | <b>1851</b>   |
| NDUFAF2  | 0,420395  | NaN       | <b>0,420395</b>  | 1671 | NaN  | <b>1671</b>   |
| GDF9     | -0,963173 | 1,804148  | <b>0,4204875</b> | 1583 | 1951 | <b>1767</b>   |
| DEGS2    | 0,208993  | 0,632447  | <b>0,42072</b>   | 1524 | 1740 | <b>1632</b>   |
| RTN2     | 0,566824  | 0,274717  | <b>0,4207705</b> | 1566 | 1894 | <b>1730</b>   |

|           |           |           |                  |      |      |               |
|-----------|-----------|-----------|------------------|------|------|---------------|
| SEMA3G    | 0,421169  | NaN       | <b>0,421169</b>  | 1756 | NaN  | <b>1756</b>   |
| C11orf10  | 0,121026  | 0,722119  | <b>0,4215725</b> | 1650 | 1914 | <b>1782</b>   |
| FAM173A   | 0,542966  | 0,300185  | <b>0,4215755</b> | 1943 | 2465 | <b>2204</b>   |
| CEP44     | 0,663648  | 0,179576  | <b>0,421612</b>  | 1958 | 2028 | <b>1993</b>   |
| LIN7C     | 0,368992  | 0,475113  | <b>0,4220525</b> | 1626 | 1842 | <b>1734</b>   |
| GDPD5     | 0,42215   | NaN       | <b>0,42215</b>   | 1036 | NaN  | <b>1036</b>   |
| KLK5      | -0,317207 | 1,162297  | <b>0,422545</b>  | 1391 | 1915 | <b>1653</b>   |
| NOP10     | 0,930522  | -0,085353 | <b>0,4225845</b> | 2363 | 2000 | <b>2181,5</b> |
| CXCL12    | 0,510771  | 0,334504  | <b>0,4226375</b> | 1649 | 2036 | <b>1842,5</b> |
| CD274     | 0,167455  | 0,677835  | <b>0,422645</b>  | 1746 | 2193 | <b>1969,5</b> |
| ZNF345    | 0,528156  | 0,318145  | <b>0,4231505</b> | 2024 | 2353 | <b>2188,5</b> |
| NAA15     | 0,113968  | 0,733432  | <b>0,4237</b>    | 1137 | 1316 | <b>1226,5</b> |
| PLB1      | NaN       | 0,423773  | <b>0,423773</b>  | NaN  | 2417 | <b>2417</b>   |
| CNBP      | 0,137842  | 0,709784  | <b>0,423813</b>  | 1009 | 1402 | <b>1205,5</b> |
| RPUSD4    | 0,442768  | 0,404894  | <b>0,423831</b>  | 1359 | 2227 | <b>1793</b>   |
| NCKAP5    | 0,717516  | 0,13029   | <b>0,423903</b>  | 1758 | 2206 | <b>1982</b>   |
| ARAF      | -0,17977  | 1,027769  | <b>0,4239995</b> | 1331 | 1920 | <b>1625,5</b> |
| C10orf113 | -0,217891 | 1,066129  | <b>0,424119</b>  | 2173 | 3168 | <b>2670,5</b> |
| SH2D2A    | 0,526649  | 0,321624  | <b>0,4241365</b> | 1632 | 1832 | <b>1732</b>   |
| CST5      | -0,018425 | 0,867733  | <b>0,424654</b>  | 1010 | 1205 | <b>1107,5</b> |
| ZNRF1     | 0,581912  | 0,267743  | <b>0,4248275</b> | 1496 | 2410 | <b>1953</b>   |
| ATP6V1G1  | 0,959315  | -0,109534 | <b>0,4248905</b> | 1184 | 1342 | <b>1263</b>   |
| ATG9B     | 0,619229  | 0,230764  | <b>0,4249965</b> | 1297 | 1908 | <b>1602,5</b> |
| EBI3      | 1,45048   | -0,600454 | <b>0,425013</b>  | 2093 | 2623 | <b>2358</b>   |
| PRAM1     | 0,574249  | 0,276384  | <b>0,4253165</b> | 1502 | 1836 | <b>1669</b>   |
| RASL12    | 1,311513  | -0,460735 | <b>0,425389</b>  | 1561 | 2051 | <b>1806</b>   |
| OR6N2     | 1,178906  | -0,327921 | <b>0,4254925</b> | 1910 | 2195 | <b>2052,5</b> |
| RHOBTB3   | 0,934416  | -0,083131 | <b>0,4256425</b> | 1746 | 3027 | <b>2386,5</b> |
| ACOT9     | 0,229212  | 0,622302  | <b>0,425757</b>  | 1972 | 3054 | <b>2513</b>   |
| ZNF33A    | 1,086192  | -0,234303 | <b>0,4259445</b> | 1603 | 1770 | <b>1686,5</b> |
| ARL6IP6   | 0,426361  | NaN       | <b>0,426361</b>  | 1794 | NaN  | <b>1794</b>   |
| GRHL1     | 0,371353  | 0,482005  | <b>0,426679</b>  | 2011 | 2447 | <b>2229</b>   |
| PLEKHB1   | 0,560732  | 0,292704  | <b>0,426718</b>  | 2058 | 2256 | <b>2157</b>   |
| C11orf30  | 0,824046  | 0,030071  | <b>0,4270585</b> | 1516 | 2645 | <b>2080,5</b> |

|           |           |           |                  |      |      |               |
|-----------|-----------|-----------|------------------|------|------|---------------|
| C2orf42   | 1,063142  | -0,209023 | <b>0,4270595</b> | 1145 | 1508 | <b>1326,5</b> |
| PCDHA8    | 0,702907  | 0,151782  | <b>0,4273445</b> | 1906 | 2121 | <b>2013,5</b> |
| C10orf35  | 0,328387  | 0,52661   | <b>0,4274985</b> | 2026 | 1621 | <b>1823,5</b> |
| RALYL     | 1,016066  | -0,161029 | <b>0,4275185</b> | 1433 | 1627 | <b>1530</b>   |
| ST13      | 0,468456  | 0,38736   | <b>0,427908</b>  | 1939 | 2703 | <b>2321</b>   |
| GPR12     | 0,427922  | NaN       | <b>0,427922</b>  | 1416 | NaN  | <b>1416</b>   |
| CSNK2A2   | 0,271196  | 0,584736  | <b>0,427966</b>  | 1498 | 1645 | <b>1571,5</b> |
| HEATR5B   | 0,415069  | 0,440895  | <b>0,427982</b>  | 1610 | 2145 | <b>1877,5</b> |
| SCARB1    | 0,565445  | 0,290566  | <b>0,4280055</b> | 1830 | 2706 | <b>2268</b>   |
| UAP1      | 0,41381   | 0,442219  | <b>0,4280145</b> | 974  | 1225 | <b>1099,5</b> |
| C10orf58  | 0,428155  | NaN       | <b>0,428155</b>  | 1786 | NaN  | <b>1786</b>   |
| B3GALT1   | 0,428213  | NaN       | <b>0,428213</b>  | 1434 | NaN  | <b>1434</b>   |
| ING3      | -0,175461 | 1,032171  | <b>0,428355</b>  | 1678 | 2452 | <b>2065</b>   |
| PMEL      | 0,388373  | 0,468449  | <b>0,428411</b>  | 1364 | 1923 | <b>1643,5</b> |
| PDE3A     | 0,932639  | -0,075284 | <b>0,4286775</b> | 1686 | 3267 | <b>2476,5</b> |
| DYNLT1    | 0,928092  | -0,070234 | <b>0,428929</b>  | 999  | 1751 | <b>1375</b>   |
| AKAP9     | 0,271049  | 0,587087  | <b>0,429068</b>  | 1919 | 2664 | <b>2291,5</b> |
| SERPINA11 | 1,200325  | -0,341749 | <b>0,429288</b>  | 1335 | 1763 | <b>1549</b>   |
| LAMP3     | 0,429403  | NaN       | <b>0,429403</b>  | 1242 | NaN  | <b>1242</b>   |
| UGP2      | -0,107693 | 0,966737  | <b>0,429522</b>  | 1975 | 2192 | <b>2083,5</b> |
| FTL       | 0,433606  | 0,42544   | <b>0,429523</b>  | 1586 | 2267 | <b>1926,5</b> |
| KRT35     | 0,056414  | 0,802856  | <b>0,429635</b>  | 1402 | 2145 | <b>1773,5</b> |
| KLF2      | 0,521077  | 0,338364  | <b>0,4297205</b> | 1430 | 1724 | <b>1577</b>   |
| FAM57A    | 0,42987   | NaN       | <b>0,42987</b>   | 1909 | NaN  | <b>1909</b>   |
| CDCP1     | 0,2064    | 0,653415  | <b>0,4299075</b> | 1545 | 2037 | <b>1791</b>   |
| MYCL1     | 0,344298  | 0,515643  | <b>0,4299705</b> | 1992 | 2275 | <b>2133,5</b> |
| NRXN1     | 0,411928  | 0,448499  | <b>0,4302135</b> | 1490 | 1803 | <b>1646,5</b> |
| NKAIN1    | 0,817623  | 0,043058  | <b>0,4303405</b> | 1796 | 2202 | <b>1999</b>   |
| CALR      | NaN       | 0,430424  | <b>0,430424</b>  | NaN  | 2888 | <b>2888</b>   |
| MED28     | 0,108299  | 0,752785  | <b>0,430542</b>  | 1528 | 1761 | <b>1644,5</b> |
| FAM83E    | 0,845452  | 0,015657  | <b>0,4305545</b> | 1521 | 1812 | <b>1666,5</b> |
| TRMT1L    | 0,131886  | 0,729747  | <b>0,4308165</b> | 1817 | 2280 | <b>2048,5</b> |
| CLRN1     | 0,762676  | 0,099334  | <b>0,431005</b>  | 1630 | 2519 | <b>2074,5</b> |
| KCNAB3    | 0,49904   | 0,363032  | <b>0,431036</b>  | 2058 | 2706 | <b>2382</b>   |

|          |           |           |                  |      |      |               |
|----------|-----------|-----------|------------------|------|------|---------------|
| FAM20B   | 0,384516  | 0,477729  | <b>0,4311225</b> | 1288 | 1424 | <b>1356</b>   |
| CCR10    | 0,431159  | NaN       | <b>0,431159</b>  | 1583 | NaN  | <b>1583</b>   |
| DERL2    | 0,253835  | 0,60852   | <b>0,4311775</b> | 1739 | 1723 | <b>1731</b>   |
| SNRNP35  | 0,798526  | 0,064346  | <b>0,431436</b>  | 1275 | 1165 | <b>1220</b>   |
| CSF1     | -0,126741 | 0,989738  | <b>0,4314985</b> | 1902 | 1774 | <b>1838</b>   |
| IVD      | 1,258205  | -0,395049 | <b>0,431578</b>  | 2048 | 2092 | <b>2070</b>   |
| PRKG2    | 0,153428  | 0,709808  | <b>0,431618</b>  | 1876 | 2254 | <b>2065</b>   |
| FAM178B  | 1,073083  | -0,209828 | <b>0,4316275</b> | 1310 | 1536 | <b>1423</b>   |
| LCE2C    | 1,478825  | -0,615555 | <b>0,431635</b>  | 1134 | 1626 | <b>1380</b>   |
| FUT9     | -0,517818 | 1,381151  | <b>0,4316665</b> | 1236 | 1370 | <b>1303</b>   |
| HOXA3    | 0,431823  | NaN       | <b>0,431823</b>  | 1384 | NaN  | <b>1384</b>   |
| TFCP2L1  | -0,014896 | 0,87858   | <b>0,431842</b>  | 1554 | 1365 | <b>1459,5</b> |
| RNF8     | -0,32073  | 1,184456  | <b>0,431863</b>  | 1319 | 2501 | <b>1910</b>   |
| SGCA     | 1,262132  | -0,398403 | <b>0,4318645</b> | 1073 | 922  | <b>997,5</b>  |
| WDR31    | 0,517426  | 0,346379  | <b>0,4319025</b> | 1687 | 1725 | <b>1706</b>   |
| ICT1     | 1,307401  | -0,442978 | <b>0,4322115</b> | 1386 | 1193 | <b>1289,5</b> |
| VAV3     | 0,056706  | 0,808052  | <b>0,432379</b>  | 1730 | 1705 | <b>1717,5</b> |
| HTATIP2  | 0,502646  | 0,36251   | <b>0,432578</b>  | 2073 | 3055 | <b>2564</b>   |
| GRID1    | 0,179297  | 0,686022  | <b>0,4326595</b> | 1802 | 2429 | <b>2115,5</b> |
| ZNF217   | 0,896868  | -0,031542 | <b>0,432663</b>  | 1618 | 2704 | <b>2161</b>   |
| IL13RA2  | -0,717525 | 1,582985  | <b>0,43273</b>   | 765  | 1673 | <b>1219</b>   |
| CRELD2   | 0,432866  | NaN       | <b>0,432866</b>  | 1671 | NaN  | <b>1671</b>   |
| FOSL2    | 0,706633  | 0,159425  | <b>0,433029</b>  | 1400 | 1342 | <b>1371</b>   |
| C11orf70 | 0,43317   | NaN       | <b>0,43317</b>   | 1836 | NaN  | <b>1836</b>   |
| NPSR1    | 0,433304  | NaN       | <b>0,433304</b>  | 1233 | NaN  | <b>1233</b>   |
| SQRDL    | 0,65124   | 0,216184  | <b>0,433712</b>  | 1050 | 1531 | <b>1290,5</b> |
| HARS     | -0,333457 | 1,200893  | <b>0,433718</b>  | 1339 | 2488 | <b>1913,5</b> |
| HOXB9    | 0,689545  | 0,177943  | <b>0,433744</b>  | 2187 | 1996 | <b>2091,5</b> |
| AGMO     | 0,472849  | 0,394809  | <b>0,433829</b>  | 1156 | 2346 | <b>1751</b>   |
| SH3BGRL  | 0,434081  | NaN       | <b>0,434081</b>  | 2012 | NaN  | <b>2012</b>   |
| FBXO2    | 0,637737  | 0,230675  | <b>0,434206</b>  | 1421 | 2405 | <b>1913</b>   |
| EIF3L    | 0,434304  | NaN       | <b>0,434304</b>  | 1480 | NaN  | <b>1480</b>   |
| OR6K3    | 0,543758  | 0,324985  | <b>0,4343715</b> | 2002 | 2178 | <b>2090</b>   |
| MEGF10   | 0,434478  | NaN       | <b>0,434478</b>  | 1688 | NaN  | <b>1688</b>   |

|           |           |           |                  |      |      |               |
|-----------|-----------|-----------|------------------|------|------|---------------|
| ACAD9     | 1,351157  | -0,481974 | <b>0,4345915</b> | 1591 | 1924 | <b>1757,5</b> |
| ALKBH4    | 0,655531  | 0,213824  | <b>0,4346775</b> | 1195 | 1565 | <b>1380</b>   |
| TMEM67    | 0,591738  | 0,277831  | <b>0,4347845</b> | 2114 | 2354 | <b>2234</b>   |
| FAM83A    | 0,434871  | NaN       | <b>0,434871</b>  | 1426 | NaN  | <b>1426</b>   |
| EGLN3     | 0,855902  | 0,013922  | <b>0,434912</b>  | 1255 | 1415 | <b>1335</b>   |
| SEZ6      | 0,435011  | NaN       | <b>0,435011</b>  | 1470 | NaN  | <b>1470</b>   |
| C3orf17   | 0,185718  | 0,684451  | <b>0,4350845</b> | 1270 | 1561 | <b>1415,5</b> |
| PARD6B    | 0,435378  | NaN       | <b>0,435378</b>  | 1782 | NaN  | <b>1782</b>   |
| GRHL3     | 0,62431   | 0,246456  | <b>0,435383</b>  | 1481 | 1814 | <b>1647,5</b> |
| ZNF707    | 0,474917  | 0,395984  | <b>0,4354505</b> | 1606 | 2085 | <b>1845,5</b> |
| OR7C1     | 0,571439  | 0,300256  | <b>0,4358475</b> | 2189 | 2252 | <b>2220,5</b> |
| RGS18     | 0,923787  | -0,052088 | <b>0,4358495</b> | 1692 | 2097 | <b>1894,5</b> |
| BRD4      | 0,74347   | 0,12824   | <b>0,435855</b>  | 1341 | 1518 | <b>1429,5</b> |
| WDR4      | 0,81182   | 0,060147  | <b>0,4359835</b> | 2280 | 2188 | <b>2234</b>   |
| ZNF85     | -0,415067 | 1,287275  | <b>0,436104</b>  | 1851 | 1991 | <b>1921</b>   |
| HIST2H2BE | 1,176858  | -0,304581 | <b>0,4361385</b> | 1780 | 2211 | <b>1995,5</b> |
| GBP1      | 0,63215   | 0,24015   | <b>0,43615</b>   | 1356 | 2081 | <b>1718,5</b> |
| CRAMP1L   | 0,436292  | NaN       | <b>0,436292</b>  | 1682 | NaN  | <b>1682</b>   |
| BCOR      | 0,496304  | 0,376686  | <b>0,436495</b>  | 1353 | 1755 | <b>1554</b>   |
| 02-sept   | 0,872482  | 0,00078   | <b>0,436631</b>  | 1769 | 2805 | <b>2287</b>   |
| TFRC      | -0,0829   | 0,956277  | <b>0,4366885</b> | 1995 | 2184 | <b>2089,5</b> |
| NOL9      | 0,174372  | 0,699725  | <b>0,4370485</b> | 1578 | 1984 | <b>1781</b>   |
| KCNIP3    | 0,670401  | 0,203915  | <b>0,437158</b>  | 1714 | 2073 | <b>1893,5</b> |
| POLR3A    | 0,224122  | 0,65045   | <b>0,437286</b>  | 1877 | 2820 | <b>2348,5</b> |
| FAM81B    | 0,43733   | NaN       | <b>0,43733</b>   | 1518 | NaN  | <b>1518</b>   |
| GDE1      | 0,443586  | 0,431263  | <b>0,4374245</b> | 1106 | 1512 | <b>1309</b>   |
| TBX20     | 0,355998  | 0,519101  | <b>0,4375495</b> | 1965 | 2066 | <b>2015,5</b> |
| ZNF143    | -0,135783 | 1,011273  | <b>0,437745</b>  | 1952 | 2043 | <b>1997,5</b> |
| TRRAP     | 1,104586  | -0,229052 | <b>0,437767</b>  | 1585 | 1737 | <b>1661</b>   |
| HEATR7B2  | 0,602302  | 0,273248  | <b>0,437775</b>  | 1579 | 1420 | <b>1499,5</b> |
| TMEM9     | 0,438042  | NaN       | <b>0,438042</b>  | 1161 | NaN  | <b>1161</b>   |
| RTP3      | 0,936748  | -0,060353 | <b>0,4381975</b> | 1752 | 2506 | <b>2129</b>   |
| TRAPPC2   | 1,232276  | -0,355354 | <b>0,438461</b>  | 1982 | 2131 | <b>2056,5</b> |
| ZDHHC23   | 0,094025  | 0,783469  | <b>0,438747</b>  | 1815 | 2646 | <b>2230,5</b> |

|          |           |           |                  |      |      |               |
|----------|-----------|-----------|------------------|------|------|---------------|
| CYP27A1  | -0,286533 | 1,164251  | <b>0,438859</b>  | 1676 | 2037 | <b>1856,5</b> |
| MMAA     | 0,392118  | 0,485605  | <b>0,4388615</b> | 1745 | 2244 | <b>1994,5</b> |
| CTSG     | 0,389771  | 0,488198  | <b>0,4389845</b> | 1790 | 2030 | <b>1910</b>   |
| KIF5B    | 0,360944  | 0,517238  | <b>0,439091</b>  | 1882 | 1866 | <b>1874</b>   |
| AFG3L2   | 0,033963  | 0,844683  | <b>0,439323</b>  | 1326 | 2114 | <b>1720</b>   |
| HECTD2   | 0,964225  | -0,085456 | <b>0,4393845</b> | 844  | 2035 | <b>1439,5</b> |
| FHL3     | 0,693409  | 0,185947  | <b>0,439678</b>  | 2159 | 3485 | <b>2822</b>   |
| LNX2     | 0,655861  | 0,223809  | <b>0,439835</b>  | 1747 | 2208 | <b>1977,5</b> |
| RXFP4    | 0,44006   | NaN       | <b>0,44006</b>   | 1558 | NaN  | <b>1558</b>   |
| NGFRAP1  | 0,380603  | 0,499894  | <b>0,4402485</b> | 1765 | 3088 | <b>2426,5</b> |
| SLC30A5  | 1,296104  | -0,415218 | <b>0,440443</b>  | 1165 | 1709 | <b>1437</b>   |
| MSLN     | 0,404122  | 0,476991  | <b>0,4405565</b> | 1702 | 2468 | <b>2085</b>   |
| TMEM14C  | 0,184955  | 0,696627  | <b>0,440791</b>  | 1711 | 1877 | <b>1794</b>   |
| FAM82A1  | 0,138665  | 0,743552  | <b>0,4411085</b> | 1856 | 1979 | <b>1917,5</b> |
| KLK2     | -0,015115 | 0,898613  | <b>0,441749</b>  | 997  | 2042 | <b>1519,5</b> |
| HSD3B1   | 0,498681  | 0,385333  | <b>0,442007</b>  | 1820 | 2532 | <b>2176</b>   |
| CPNE2    | 0,442028  | NaN       | <b>0,442028</b>  | 1480 | NaN  | <b>1480</b>   |
| FGF21    | 0,212358  | 0,672061  | <b>0,4422095</b> | 1533 | 1673 | <b>1603</b>   |
| EIF2C1   | -0,086831 | 0,97134   | <b>0,4422545</b> | 1914 | 2140 | <b>2027</b>   |
| SPANXN1  | 0,442259  | NaN       | <b>0,442259</b>  | 1729 | NaN  | <b>1729</b>   |
| MAPK4    | 0,306712  | 0,578469  | <b>0,4425905</b> | 2053 | 1770 | <b>1911,5</b> |
| SPAM1    | 0,562203  | 0,323315  | <b>0,442759</b>  | 960  | 1315 | <b>1137,5</b> |
| ACOT4    | -0,655869 | 1,541824  | <b>0,4429775</b> | 1480 | 2015 | <b>1747,5</b> |
| IGHMBP2  | 0,263374  | 0,624141  | <b>0,4437575</b> | 1356 | 1699 | <b>1527,5</b> |
| APCDD1L  | 0,443875  | NaN       | <b>0,443875</b>  | 1528 | NaN  | <b>1528</b>   |
| SMCR8    | 0,205839  | 0,682028  | <b>0,4439335</b> | 1514 | 1914 | <b>1714</b>   |
| CLEC2B   | 0,444163  | NaN       | <b>0,444163</b>  | 1722 | NaN  | <b>1722</b>   |
| AK2      | 0,385411  | 0,503064  | <b>0,4442375</b> | 2613 | 2681 | <b>2647</b>   |
| NUDCD3   | 0,412793  | 0,476576  | <b>0,4446845</b> | 2003 | 3034 | <b>2518,5</b> |
| EIF2AK3  | 0,347219  | 0,542579  | <b>0,444899</b>  | 1466 | 2174 | <b>1820</b>   |
| GIPC1    | 0,47873   | 0,411202  | <b>0,444966</b>  | 1502 | 1927 | <b>1714,5</b> |
| HIST1H4G | 0,771934  | 0,118283  | <b>0,4451085</b> | 2029 | 1907 | <b>1968</b>   |
| TSEN54   | 0,445232  | NaN       | <b>0,445232</b>  | 1706 | NaN  | <b>1706</b>   |
| THRSP    | 1,043802  | -0,152501 | <b>0,4456505</b> | 417  | 1395 | <b>906</b>    |



|           |           |           |                  |      |      |               |
|-----------|-----------|-----------|------------------|------|------|---------------|
| MLL3      | 0,692783  | 0,198693  | <b>0,445738</b>  | 2082 | 2843 | <b>2462,5</b> |
| CRHBP     | 0,516442  | 0,376143  | <b>0,4462925</b> | 1679 | 2692 | <b>2185,5</b> |
| SYCN      | 0,903304  | -0,010658 | <b>0,446323</b>  | 1576 | 1968 | <b>1772</b>   |
| BLCAP     | 0,473907  | 0,419062  | <b>0,4464845</b> | 1500 | 1746 | <b>1623</b>   |
| ARHGAP10  | 0,643443  | 0,249565  | <b>0,446504</b>  | 1766 | 2229 | <b>1997,5</b> |
| ZDHHC9    | 0,368968  | 0,524219  | <b>0,4465935</b> | 1519 | 2186 | <b>1852,5</b> |
| GNL2      | 0,430121  | 0,463086  | <b>0,4466035</b> | 1601 | 2929 | <b>2265</b>   |
| CDH17     | 0,714792  | 0,178871  | <b>0,4468315</b> | 2103 | 3284 | <b>2693,5</b> |
| PLCH1     | 0,464689  | 0,429502  | <b>0,4470955</b> | 1928 | 2493 | <b>2210,5</b> |
| C1orf54   | 0,53262   | 0,36169   | <b>0,447155</b>  | 1723 | 1624 | <b>1673,5</b> |
| GCN1L1    | 1,434299  | -0,539275 | <b>0,447512</b>  | 1330 | 1758 | <b>1544</b>   |
| CPSF3     | 0,447758  | NaN       | <b>0,447758</b>  | 1806 | NaN  | <b>1806</b>   |
| CABP2     | -0,056237 | 0,951903  | <b>0,447833</b>  | 1655 | 1636 | <b>1645,5</b> |
| RNLS      | 0,448054  | NaN       | <b>0,448054</b>  | 1723 | NaN  | <b>1723</b>   |
| NLGN3     | -0,133363 | 1,029772  | <b>0,4482045</b> | 1416 | 2128 | <b>1772</b>   |
| CCDC142   | 0,407756  | 0,488669  | <b>0,4482125</b> | 1310 | 1785 | <b>1547,5</b> |
| LSM7      | 0,448282  | NaN       | <b>0,448282</b>  | 1405 | NaN  | <b>1405</b>   |
| TTC26     | 0,15062   | 0,74598   | <b>0,4483</b>    | 1803 | 2432 | <b>2117,5</b> |
| GGPS1     | 0,069365  | 0,827623  | <b>0,448494</b>  | 1883 | 2283 | <b>2083</b>   |
| PSMD14    | 1,42571   | -0,528262 | <b>0,448724</b>  | 473  | 798  | <b>635,5</b>  |
| GDPD3     | 0,55344   | 0,344026  | <b>0,448733</b>  | 1491 | 1584 | <b>1537,5</b> |
| ZMYND19   | 0,500644  | 0,396865  | <b>0,4487545</b> | 1564 | 2240 | <b>1902</b>   |
| CHIC1     | 0,781912  | 0,115781  | <b>0,4488465</b> | 1768 | 2567 | <b>2167,5</b> |
| CTNND2    | 0,283475  | 0,614561  | <b>0,449018</b>  | 1434 | 1624 | <b>1529</b>   |
| FPR3      | 0,449524  | NaN       | <b>0,449524</b>  | 1843 | NaN  | <b>1843</b>   |
| IFT140    | 0,621417  | 0,278107  | <b>0,449762</b>  | 1588 | 2796 | <b>2192</b>   |
| NLRP8     | 0,336611  | 0,56319   | <b>0,4499005</b> | 1309 | 1715 | <b>1512</b>   |
| PHLDA3    | 0,186805  | 0,713417  | <b>0,450111</b>  | 1564 | 1678 | <b>1621</b>   |
| NAA30     | 0,450143  | NaN       | <b>0,450143</b>  | 1935 | NaN  | <b>1935</b>   |
| CD244     | 0,769089  | 0,131397  | <b>0,450243</b>  | 1079 | 1346 | <b>1212,5</b> |
| FBXW11    | -0,192849 | 1,093463  | <b>0,450307</b>  | 1361 | 2282 | <b>1821,5</b> |
| FAM135A   | 0,450452  | NaN       | <b>0,450452</b>  | 1740 | NaN  | <b>1740</b>   |
| C10orf137 | 1,0097    | -0,108608 | <b>0,450546</b>  | 1714 | 2050 | <b>1882</b>   |
| DUSP21    | 0,679745  | 0,221808  | <b>0,4507765</b> | 1744 | 1745 | <b>1744,5</b> |

|          |           |           |                  |      |      |               |
|----------|-----------|-----------|------------------|------|------|---------------|
| FAM177B  | 0,451442  | NaN       | <b>0,451442</b>  | 1753 | NaN  | <b>1753</b>   |
| IVL      | 0,4515    | NaN       | <b>0,4515</b>    | 1308 | NaN  | <b>1308</b>   |
| DPC2     | 0,775372  | 0,12764   | <b>0,451506</b>  | 1828 | 2432 | <b>2130</b>   |
| CEACAM21 | 0,451553  | NaN       | <b>0,451553</b>  | 1971 | NaN  | <b>1971</b>   |
| LILRA1   | -0,010643 | 0,914008  | <b>0,4516825</b> | 1593 | 2598 | <b>2095,5</b> |
| ARSG     | -0,345519 | 1,249285  | <b>0,451883</b>  | 1425 | 2220 | <b>1822,5</b> |
| ANXA11   | -0,459844 | 1,364234  | <b>0,452195</b>  | 1418 | 2142 | <b>1780</b>   |
| PLA2G4C  | 0,404425  | 0,500235  | <b>0,45233</b>   | 1513 | 2137 | <b>1825</b>   |
| KDSR     | 0,887148  | 0,017682  | <b>0,452415</b>  | 1924 | 2159 | <b>2041,5</b> |
| CHP      | 0,452433  | NaN       | <b>0,452433</b>  | 1516 | NaN  | <b>1516</b>   |
| PLA2G12B | 0,551185  | 0,354603  | <b>0,452894</b>  | 1759 | 2004 | <b>1881,5</b> |
| MATN4    | 0,13304   | 0,773146  | <b>0,453093</b>  | 1326 | 1686 | <b>1506</b>   |
| FLT1     | 0,502206  | 0,404102  | <b>0,453154</b>  | 2023 | 1876 | <b>1949,5</b> |
| ATF7IP   | 0,685301  | 0,221196  | <b>0,4532485</b> | 1667 | 2205 | <b>1936</b>   |
| TM4SF5   | -0,143003 | 1,049602  | <b>0,4532995</b> | 1585 | 1942 | <b>1763,5</b> |
| CES5A    | 0,697684  | 0,208934  | <b>0,453309</b>  | 1706 | 1735 | <b>1720,5</b> |
| KCNH8    | 0,506746  | 0,400329  | <b>0,4535375</b> | 1599 | 1534 | <b>1566,5</b> |
| SDPR     | 0,453614  | NaN       | <b>0,453614</b>  | 1589 | NaN  | <b>1589</b>   |
| SLC33A1  | 0,797422  | 0,10994   | <b>0,453681</b>  | 1620 | 2216 | <b>1918</b>   |
| AKT1     | 1,324207  | -0,416338 | <b>0,4539345</b> | 1995 | 2295 | <b>2145</b>   |
| DHX35    | -0,122405 | 1,030714  | <b>0,4541545</b> | 1653 | 2061 | <b>1857</b>   |
| RNASE6   | 0,752736  | 0,156165  | <b>0,4544505</b> | 604  | 2022 | <b>1313</b>   |
| PIGS     | 0,737725  | 0,171305  | <b>0,454515</b>  | 1082 | 1636 | <b>1359</b>   |
| VTCN1    | 0,132056  | 0,777043  | <b>0,4545495</b> | 1119 | 1646 | <b>1382,5</b> |
| IARS     | -0,246651 | 1,155926  | <b>0,4546375</b> | 1233 | 1711 | <b>1472</b>   |
| DOCK6    | 0,841299  | 0,068733  | <b>0,455016</b>  | 1571 | 2108 | <b>1839,5</b> |
| WIPF2    | 1,058087  | -0,147938 | <b>0,4550745</b> | 1802 | 2980 | <b>2391</b>   |
| MEST     | -0,050143 | 0,960368  | <b>0,4551125</b> | 1382 | 2031 | <b>1706,5</b> |
| GOLM1    | -0,011364 | 0,921605  | <b>0,4551205</b> | 1329 | 1911 | <b>1620</b>   |
| GTF2A2   | 1,664507  | -0,753865 | <b>0,455321</b>  | 1910 | 2866 | <b>2388</b>   |
| PTPN14   | 0,780316  | 0,130401  | <b>0,4553585</b> | 1833 | 2189 | <b>2011</b>   |
| FEZF2    | 0,863796  | 0,046931  | <b>0,4553635</b> | 1479 | 1877 | <b>1678</b>   |
| ODF1     | 0,852063  | 0,059131  | <b>0,455597</b>  | 1890 | 2072 | <b>1981</b>   |
| MLLT6    | -0,339743 | 1,251347  | <b>0,455802</b>  | 1580 | 2453 | <b>2016,5</b> |

|          |           |           |                  |      |      |               |
|----------|-----------|-----------|------------------|------|------|---------------|
| CMAS     | 1,240542  | -0,327879 | <b>0,4563315</b> | 1991 | 2264 | <b>2127,5</b> |
| COL25A1  | 0,169023  | 0,745547  | <b>0,457285</b>  | 1776 | 2022 | <b>1899</b>   |
| UACA     | 1,672193  | -0,757033 | <b>0,45758</b>   | 1818 | 2861 | <b>2339,5</b> |
| GATA4    | 1,022996  | -0,10709  | <b>0,457953</b>  | 1832 | 2145 | <b>1988,5</b> |
| IER3     | 1,322964  | -0,405487 | <b>0,4587385</b> | 1573 | 1915 | <b>1744</b>   |
| ZNF181   | 0,458751  | NaN       | <b>0,458751</b>  | 1885 | NaN  | <b>1885</b>   |
| MB       | 0,48224   | 0,435371  | <b>0,4588055</b> | 1771 | 1981 | <b>1876</b>   |
| AZU1     | 0,977901  | -0,060276 | <b>0,4588125</b> | 1363 | 1577 | <b>1470</b>   |
| PDIA4    | 0,432709  | 0,486362  | <b>0,4595355</b> | 1870 | 2622 | <b>2246</b>   |
| TRIM22   | -0,260159 | 1,179877  | <b>0,459859</b>  | 2061 | 3149 | <b>2605</b>   |
| TLR5     | 0,13141   | 0,78842   | <b>0,459915</b>  | 1721 | 2833 | <b>2277</b>   |
| FLJ43860 | 0,459924  | NaN       | <b>0,459924</b>  | 1498 | NaN  | <b>1498</b>   |
| BAIAP2L1 | 0,429758  | 0,490462  | <b>0,46011</b>   | 1767 | 1924 | <b>1845,5</b> |
| PCBP4    | 0,902925  | 0,017835  | <b>0,46038</b>   | 1738 | 2069 | <b>1903,5</b> |
| ECHDC1   | -1,170594 | 2,092045  | <b>0,4607255</b> | 1525 | 1892 | <b>1708,5</b> |
| PAGE1    | 0,46092   | NaN       | <b>0,46092</b>   | 1668 | NaN  | <b>1668</b>   |
| SLC37A2  | -0,12157  | 1,043975  | <b>0,4612025</b> | 1137 | 1734 | <b>1435,5</b> |
| CNOT6    | 0,880322  | 0,042656  | <b>0,461489</b>  | 1727 | 3040 | <b>2383,5</b> |
| IQSEC2   | 0,171182  | 0,752749  | <b>0,4619655</b> | 1497 | 2263 | <b>1880</b>   |
| ZNF689   | 0,77564   | 0,148336  | <b>0,461988</b>  | 2155 | 2131 | <b>2143</b>   |
| ATP2B3   | 0,950906  | -0,026852 | <b>0,462027</b>  | 1691 | 1824 | <b>1757,5</b> |
| CHM      | 1,450784  | -0,526563 | <b>0,4621105</b> | 1997 | 2140 | <b>2068,5</b> |
| CA11     | 0,59277   | 0,331844  | <b>0,462307</b>  | 1690 | 2671 | <b>2180,5</b> |
| LPCAT4   | 0,177717  | 0,747076  | <b>0,4623965</b> | 1670 | 1756 | <b>1713</b>   |
| CYP11A1  | 0,401541  | 0,523363  | <b>0,462452</b>  | 1526 | 1743 | <b>1634,5</b> |
| GPN3     | 0,246036  | 0,679     | <b>0,462518</b>  | 2205 | 2699 | <b>2452</b>   |
| CAMP     | 1,047615  | -0,122188 | <b>0,4627135</b> | 932  | 1836 | <b>1384</b>   |
| PPID     | 1,11765   | -0,191979 | <b>0,4628355</b> | 1750 | 2142 | <b>1946</b>   |
| HYAL1    | 0,236191  | 0,689838  | <b>0,4630145</b> | 1516 | 1858 | <b>1687</b>   |
| CD69     | 0,385981  | 0,540072  | <b>0,4630265</b> | 1570 | 1664 | <b>1617</b>   |
| ARHGAP12 | 0,09947   | 0,826658  | <b>0,463064</b>  | 1620 | 1463 | <b>1541,5</b> |
| C16orf89 | 0,463589  | NaN       | <b>0,463589</b>  | 1842 | NaN  | <b>1842</b>   |
| ADD2     | 0,463625  | NaN       | <b>0,463625</b>  | 1171 | NaN  | <b>1171</b>   |
| MRPS9    | 0,46393   | NaN       | <b>0,46393</b>   | 1184 | NaN  | <b>1184</b>   |

|          |           |           |                  |      |      |               |
|----------|-----------|-----------|------------------|------|------|---------------|
| MCART6   | 0,446738  | 0,481144  | <b>0,463941</b>  | 1887 | 1792 | <b>1839,5</b> |
| TAS2R20  | 0,576465  | 0,351912  | <b>0,4641885</b> | 2246 | 2177 | <b>2211,5</b> |
| ZRANB3   | -0,081475 | 1,009888  | <b>0,4642065</b> | 1349 | 1973 | <b>1661</b>   |
| COL21A1  | 0,361709  | 0,567105  | <b>0,464407</b>  | 1649 | 1415 | <b>1532</b>   |
| PRSS12   | 0,450824  | 0,478208  | <b>0,464516</b>  | 1866 | 1998 | <b>1932</b>   |
| CDC42SE2 | -0,511254 | 1,44044   | <b>0,464593</b>  | 1509 | 1905 | <b>1707</b>   |
| ATP6V0B  | 0,474995  | 0,454304  | <b>0,4646495</b> | 1153 | 2447 | <b>1800</b>   |
| REEP4    | 0,770227  | 0,159724  | <b>0,4649755</b> | 1977 | 3096 | <b>2536,5</b> |
| KIF2A    | 1,345499  | -0,415453 | <b>0,465023</b>  | 1516 | 2411 | <b>1963,5</b> |
| IL16     | 0,483594  | 0,446454  | <b>0,465024</b>  | 1982 | 3233 | <b>2607,5</b> |
| POTEA    | 0,363576  | 0,567283  | <b>0,4654295</b> | 2145 | 1550 | <b>1847,5</b> |
| CTNS     | 1,109197  | -0,178035 | <b>0,465581</b>  | 1626 | 2184 | <b>1905</b>   |
| FHDC1    | 0,83363   | 0,097538  | <b>0,465584</b>  | 1687 | 2021 | <b>1854</b>   |
| PI16     | 0,465926  | NaN       | <b>0,465926</b>  | 1540 | NaN  | <b>1540</b>   |
| GPR155   | 0,466128  | NaN       | <b>0,466128</b>  | 1824 | NaN  | <b>1824</b>   |
| SNX10    | 0,022333  | 0,910118  | <b>0,4662255</b> | 1597 | 1971 | <b>1784</b>   |
| XBP1     | 0,023683  | 0,909741  | <b>0,466712</b>  | 1957 | 2451 | <b>2204</b>   |
| NKRF     | 0,467184  | NaN       | <b>0,467184</b>  | 1419 | NaN  | <b>1419</b>   |
| MEPCE    | 0,753548  | 0,18083   | <b>0,467189</b>  | 942  | 1688 | <b>1315</b>   |
| MOSPD1   | 1,339931  | -0,405444 | <b>0,4672435</b> | 1789 | 1702 | <b>1745,5</b> |
| RPS6KB1  | 0,11033   | 0,824611  | <b>0,4674705</b> | 1561 | 2111 | <b>1836</b>   |
| ZBTB12   | 0,467496  | NaN       | <b>0,467496</b>  | 1156 | NaN  | <b>1156</b>   |
| HMBOX1   | 0,467625  | NaN       | <b>0,467625</b>  | 1713 | NaN  | <b>1713</b>   |
| EXOSC7   | 0,365527  | 0,569777  | <b>0,467652</b>  | 1639 | 2779 | <b>2209</b>   |
| OR11A1   | 0,378265  | 0,557258  | <b>0,4677615</b> | 2139 | 2339 | <b>2239</b>   |
| MECR     | 0,271958  | 0,663636  | <b>0,467797</b>  | 1559 | 2346 | <b>1952,5</b> |
| KCTD18   | 0,467818  | NaN       | <b>0,467818</b>  | 1945 | NaN  | <b>1945</b>   |
| MLYCD    | 0,3239    | 0,611773  | <b>0,4678365</b> | 1265 | 1973 | <b>1619</b>   |
| TRIM62   | 0,500017  | 0,435775  | <b>0,467896</b>  | 1233 | 2337 | <b>1785</b>   |
| OR4D2    | 0,44385   | 0,492327  | <b>0,4680885</b> | 1457 | 1597 | <b>1527</b>   |
| TMEM63C  | 0,148314  | 0,788316  | <b>0,468315</b>  | 1763 | 2211 | <b>1987</b>   |
| ANAPC13  | 0,186164  | 0,750608  | <b>0,468386</b>  | 1787 | 2308 | <b>2047,5</b> |
| C8orf47  | 0,468436  | NaN       | <b>0,468436</b>  | 1144 | NaN  | <b>1144</b>   |
| AXIN2    | 0,468793  | NaN       | <b>0,468793</b>  | 1687 | NaN  | <b>1687</b>   |

|          |           |           |                  |      |      |               |
|----------|-----------|-----------|------------------|------|------|---------------|
| ADAM18   | 0,047174  | 0,890723  | <b>0,4689485</b> | 948  | 1820 | <b>1384</b>   |
| 10-sept  | 0,005234  | 0,93335   | <b>0,469292</b>  | 1748 | 1854 | <b>1801</b>   |
| C1QBP    | 0,469368  | NaN       | <b>0,469368</b>  | 1578 | NaN  | <b>1578</b>   |
| TSC1     | 0,547329  | 0,392942  | <b>0,4701355</b> | 1584 | 2291 | <b>1937,5</b> |
| NRF1     | 1,390539  | -0,449474 | <b>0,4705325</b> | 1295 | 1399 | <b>1347</b>   |
| ANKLE1   | 0,470752  | NaN       | <b>0,470752</b>  | 1510 | NaN  | <b>1510</b>   |
| STARD3NL | 0,20963   | 0,732603  | <b>0,4711165</b> | 1931 | 2353 | <b>2142</b>   |
| DMC1     | 0,339453  | 0,602957  | <b>0,471205</b>  | 1875 | 1863 | <b>1869</b>   |
| WFDC1    | 0,47134   | NaN       | <b>0,47134</b>   | 1418 | NaN  | <b>1418</b>   |
| EXOC1    | 0,936875  | 0,00592   | <b>0,4713975</b> | 1714 | 1894 | <b>1804</b>   |
| ZAN      | 0,570554  | 0,37259   | <b>0,471572</b>  | 1844 | 1879 | <b>1861,5</b> |
| DNAJA4   | 0,200008  | 0,743159  | <b>0,4715835</b> | 1470 | 1936 | <b>1703</b>   |
| DNAJB6   | 0,221968  | 0,721205  | <b>0,4715865</b> | 1962 | 2853 | <b>2407,5</b> |
| TRPC4AP  | 0,848932  | 0,094648  | <b>0,47179</b>   | 1583 | 2674 | <b>2128,5</b> |
| ZNF260   | 0,690343  | 0,254111  | <b>0,472227</b>  | 2053 | 2641 | <b>2347</b>   |
| HPGD     | 0,490149  | 0,455092  | <b>0,4726205</b> | 1277 | 1675 | <b>1476</b>   |
| SH3TC1   | 0,369038  | 0,576246  | <b>0,472642</b>  | 1043 | 1693 | <b>1368</b>   |
| RPH3AL   | 0,472667  | NaN       | <b>0,472667</b>  | 1618 | NaN  | <b>1618</b>   |
| RECQL5   | 0,805019  | 0,140552  | <b>0,4727855</b> | 1146 | 2058 | <b>1602</b>   |
| AGPAT9   | -0,028652 | 0,975003  | <b>0,4731755</b> | 1691 | 2449 | <b>2070</b>   |
| ANGEL2   | 0,473279  | NaN       | <b>0,473279</b>  | 1730 | NaN  | <b>1730</b>   |
| COQ4     | 0,47375   | NaN       | <b>0,47375</b>   | 1681 | NaN  | <b>1681</b>   |
| ZNF584   | 0,648997  | 0,298691  | <b>0,473844</b>  | 1682 | 1982 | <b>1832</b>   |
| BDKRB2   | 0,407549  | 0,540345  | <b>0,473947</b>  | 1589 | 1874 | <b>1731,5</b> |
| CPXM1    | 1,113923  | -0,16586  | <b>0,4740315</b> | 1849 | 2456 | <b>2152,5</b> |
| TAOK3    | 0,154217  | 0,793992  | <b>0,4741045</b> | 1887 | 2408 | <b>2147,5</b> |
| ABHD13   | 1,343122  | -0,394417 | <b>0,4743525</b> | 1134 | 2191 | <b>1662,5</b> |
| RALGAPA2 | 0,47439   | NaN       | <b>0,47439</b>   | 2299 | NaN  | <b>2299</b>   |
| DNAJC21  | 0,211284  | 0,738119  | <b>0,4747015</b> | 1680 | 1735 | <b>1707,5</b> |
| KRT71    | 0,260869  | 0,68868   | <b>0,4747745</b> | 2169 | 1895 | <b>2032</b>   |
| IL17C    | 0,301156  | 0,648436  | <b>0,474796</b>  | 1340 | 2325 | <b>1832,5</b> |
| TRIB1    | 0,480267  | 0,46972   | <b>0,4749935</b> | 1484 | 1268 | <b>1376</b>   |
| CELF6    | 0,888579  | 0,061667  | <b>0,475123</b>  | 1226 | 1658 | <b>1442</b>   |
| TSPAN9   | 0,736991  | 0,213368  | <b>0,4751795</b> | 1764 | 2048 | <b>1906</b>   |

|          |           |          |                  |      |      |               |
|----------|-----------|----------|------------------|------|------|---------------|
| PSME2    | 0,663555  | 0,287028 | <b>0,4752915</b> | 1605 | 1826 | <b>1715,5</b> |
| EIF3H    | 0,251071  | 0,699624 | <b>0,4753475</b> | 900  | 1809 | <b>1354,5</b> |
| KLRB1    | 0,268679  | 0,682173 | <b>0,475426</b>  | 1995 | 2427 | <b>2211</b>   |
| DKK1     | 0,049994  | 0,901309 | <b>0,4756515</b> | 1529 | 1657 | <b>1593</b>   |
| SGIP1    | 0,475811  | NaN      | <b>0,475811</b>  | 1693 | NaN  | <b>1693</b>   |
| KCNA3    | 0,277471  | 0,674504 | <b>0,4759875</b> | 2028 | 2252 | <b>2140</b>   |
| SCO1     | 0,54325   | 0,40971  | <b>0,47648</b>   | 1562 | 1701 | <b>1631,5</b> |
| PRPS1L1  | 0,42005   | 0,532964 | <b>0,476507</b>  | 1660 | 1831 | <b>1745,5</b> |
| PPIE     | 0,32732   | 0,625932 | <b>0,476626</b>  | 1593 | 2028 | <b>1810,5</b> |
| CCDC94   | 0,476666  | NaN      | <b>0,476666</b>  | 1270 | NaN  | <b>1270</b>   |
| DEFB129  | 0,776006  | 0,178252 | <b>0,477129</b>  | 1739 | 2000 | <b>1869,5</b> |
| DYNLL2   | 0,306338  | 0,647972 | <b>0,477155</b>  | 1014 | 1266 | <b>1140</b>   |
| SLC25A4  | 0,346195  | 0,609563 | <b>0,477879</b>  | 1692 | 1809 | <b>1750,5</b> |
| LONRF3   | 0,598136  | 0,359224 | <b>0,47868</b>   | 1501 | 2348 | <b>1924,5</b> |
| GPT      | 0,941331  | 0,01654  | <b>0,4789355</b> | 1857 | 1783 | <b>1820</b>   |
| CMBL     | 0,042037  | 0,916683 | <b>0,47936</b>   | 1443 | 1812 | <b>1627,5</b> |
| METAP2   | 0,357073  | 0,601795 | <b>0,479434</b>  | 1109 | 2112 | <b>1610,5</b> |
| ACTN4    | 0,707813  | 0,251148 | <b>0,4794805</b> | 1536 | 2625 | <b>2080,5</b> |
| NSRP1    | 0,350013  | 0,609143 | <b>0,479578</b>  | 1380 | 2020 | <b>1700</b>   |
| ZNF503   | -0,073206 | 1,032578 | <b>0,479686</b>  | 1687 | 1793 | <b>1740</b>   |
| TBPL1    | 0,801513  | 0,158763 | <b>0,480138</b>  | 1933 | 1942 | <b>1937,5</b> |
| CD160    | NaN       | 0,480283 | <b>0,480283</b>  | NaN  | 2385 | <b>2385</b>   |
| FCER1G   | 0,460553  | 0,500793 | <b>0,480673</b>  | 1813 | 3000 | <b>2406,5</b> |
| RS1      | 0,480784  | NaN      | <b>0,480784</b>  | 1180 | NaN  | <b>1180</b>   |
| MYOF     | 0,592393  | 0,369438 | <b>0,4809155</b> | 1285 | 1910 | <b>1597,5</b> |
| EZR      | 0,352985  | 0,609097 | <b>0,481041</b>  | 1947 | 1788 | <b>1867,5</b> |
| ABHD5    | 0,487424  | 0,475179 | <b>0,4813015</b> | 1345 | 1939 | <b>1642</b>   |
| TFF3     | 0,431681  | 0,531152 | <b>0,4814165</b> | 1225 | 2199 | <b>1712</b>   |
| GSTA4    | 0,36949   | 0,593561 | <b>0,4815255</b> | 1534 | 1779 | <b>1656,5</b> |
| CUL4B    | 0,4578    | 0,505349 | <b>0,4815745</b> | 1986 | 3343 | <b>2664,5</b> |
| OBSCN    | 0,746163  | 0,217077 | <b>0,48162</b>   | 1675 | 2483 | <b>2079</b>   |
| RASGRP3  | 0,742025  | 0,221505 | <b>0,481765</b>  | 1422 | 1761 | <b>1591,5</b> |
| LCE2A    | 0,822667  | 0,141181 | <b>0,481924</b>  | 1561 | 1928 | <b>1744,5</b> |
| C6orf163 | 0,337593  | 0,626294 | <b>0,4819435</b> | 947  | 1652 | <b>1299,5</b> |

|          |           |           |                  |      |      |               |
|----------|-----------|-----------|------------------|------|------|---------------|
| MYL4     | 0,12623   | 0,837762  | <b>0,481996</b>  | 2291 | 1930 | <b>2110,5</b> |
| TMEM130  | 0,730984  | 0,233166  | <b>0,482075</b>  | 1795 | 2129 | <b>1962</b>   |
| CCRL1    | 0,545279  | 0,419305  | <b>0,482292</b>  | 2255 | 2077 | <b>2166</b>   |
| TAF1B    | 1,108654  | -0,144062 | <b>0,482296</b>  | 1344 | 2440 | <b>1892</b>   |
| RNF17    | 0,685786  | 0,279161  | <b>0,4824735</b> | 1621 | 2324 | <b>1972,5</b> |
| FAM126B  | 0,482478  | NaN       | <b>0,482478</b>  | 1982 | NaN  | <b>1982</b>   |
| ZNF566   | 0,484359  | 0,480611  | <b>0,482485</b>  | 1590 | 1729 | <b>1659,5</b> |
| ZFY      | 0,601317  | 0,363822  | <b>0,4825695</b> | 1196 | 1758 | <b>1477</b>   |
| WDR52    | 0,742323  | 0,223767  | <b>0,483045</b>  | 1559 | 2244 | <b>1901,5</b> |
| USP18    | 1,438808  | -0,472353 | <b>0,4832275</b> | 1441 | 2134 | <b>1787,5</b> |
| AIF1L    | -0,200068 | 1,167629  | <b>0,4837805</b> | 1338 | 2291 | <b>1814,5</b> |
| IL21R    | 0,139728  | 0,828205  | <b>0,4839665</b> | 2126 | 3473 | <b>2799,5</b> |
| NAIF1    | 0,824873  | 0,143787  | <b>0,48433</b>   | 1505 | 1554 | <b>1529,5</b> |
| FGF13    | 0,931028  | 0,037911  | <b>0,4844695</b> | 1748 | 1783 | <b>1765,5</b> |
| TMEM11   | 0,484716  | NaN       | <b>0,484716</b>  | 2007 | NaN  | <b>2007</b>   |
| KCNAB2   | 0,788742  | 0,18088   | <b>0,484811</b>  | 2248 | 2436 | <b>2342</b>   |
| GFOD1    | 0,868874  | 0,100822  | <b>0,484848</b>  | 2116 | 2236 | <b>2176</b>   |
| GTF3C4   | NaN       | 0,484939  | <b>0,484939</b>  | NaN  | 2677 | <b>2677</b>   |
| KIFAP3   | 1,190996  | -0,220935 | <b>0,4850305</b> | 1787 | 2814 | <b>2300,5</b> |
| PPP1R14A | -0,519699 | 1,489825  | <b>0,485063</b>  | 1827 | 1887 | <b>1857</b>   |
| DPH2     | 0,226065  | 0,744404  | <b>0,4852345</b> | 1738 | 1982 | <b>1860</b>   |
| HTRA4    | 0,232357  | 0,73821   | <b>0,4852835</b> | 1629 | 1486 | <b>1557,5</b> |
| BST2     | 0,485385  | NaN       | <b>0,485385</b>  | 1300 | NaN  | <b>1300</b>   |
| CYP4V2   | 0,485487  | NaN       | <b>0,485487</b>  | 1796 | NaN  | <b>1796</b>   |
| RBP1     | 0,321086  | 0,650066  | <b>0,485576</b>  | 1489 | 2332 | <b>1910,5</b> |
| GLTP     | 0,912256  | 0,059646  | <b>0,485951</b>  | 1537 | 1945 | <b>1741</b>   |
| ASCL3    | 0,609373  | 0,362639  | <b>0,486006</b>  | 1671 | 2342 | <b>2006,5</b> |
| PTK2B    | -0,029261 | 1,001723  | <b>0,486231</b>  | 1752 | 1300 | <b>1526</b>   |
| ARHGAP29 | 0,486774  | NaN       | <b>0,486774</b>  | 2091 | NaN  | <b>2091</b>   |
| HSPA4    | 0,235178  | 0,738627  | <b>0,4869025</b> | 2154 | 2671 | <b>2412,5</b> |
| GATA3    | -0,072729 | 1,046544  | <b>0,4869075</b> | 2286 | 2507 | <b>2396,5</b> |
| PRR15L   | 0,486961  | NaN       | <b>0,486961</b>  | 1391 | NaN  | <b>1391</b>   |
| GALC     | 0,371947  | 0,603216  | <b>0,4875815</b> | 1531 | 1933 | <b>1732</b>   |
| PIK3AP1  | 0,56454   | 0,410754  | <b>0,487647</b>  | 1146 | 1619 | <b>1382,5</b> |

|          |           |           |                  |      |      |               |
|----------|-----------|-----------|------------------|------|------|---------------|
| LECT1    | 0,680783  | 0,294888  | <b>0,4878355</b> | 1596 | 2548 | <b>2072</b>   |
| TAS2R60  | -0,255214 | 1,231224  | <b>0,488005</b>  | 1684 | 2027 | <b>1855,5</b> |
| MLNR     | 0,488255  | NaN       | <b>0,488255</b>  | 1252 | NaN  | <b>1252</b>   |
| ABCB4    | NaN       | 0,488274  | <b>0,488274</b>  | NaN  | 3112 | <b>3112</b>   |
| TCF7     | 1,416195  | -0,43927  | <b>0,4884625</b> | 1219 | 1847 | <b>1533</b>   |
| PRR11    | 0,50936   | 0,468296  | <b>0,488828</b>  | 1898 | 2546 | <b>2222</b>   |
| ASAP2    | 0,778771  | 0,199199  | <b>0,488985</b>  | 1598 | 1718 | <b>1658</b>   |
| CWF19L2  | -0,772995 | 1,751832  | <b>0,4894185</b> | 865  | 464  | <b>664,5</b>  |
| GPM6B    | 0,490008  | NaN       | <b>0,490008</b>  | 1070 | NaN  | <b>1070</b>   |
| LRFN5    | 1,680736  | -0,700453 | <b>0,4901415</b> | 1522 | 1799 | <b>1660,5</b> |
| 10-mars  | 0,429171  | 0,551276  | <b>0,4902235</b> | 1856 | 2350 | <b>2103</b>   |
| C8orf40  | 0,490311  | NaN       | <b>0,490311</b>  | 1811 | NaN  | <b>1811</b>   |
| ACSS1    | 0,897663  | 0,082967  | <b>0,490315</b>  | 1579 | 1594 | <b>1586,5</b> |
| KLC3     | 0,175317  | 0,80533   | <b>0,4903235</b> | 1637 | 1770 | <b>1703,5</b> |
| KIAA0100 | -0,534717 | 1,515515  | <b>0,490399</b>  | 1373 | 1905 | <b>1639</b>   |
| UBE2R2   | 0,320864  | 0,660007  | <b>0,4904355</b> | 1716 | 2737 | <b>2226,5</b> |
| CNDP1    | 0,103518  | 0,877401  | <b>0,4904595</b> | 1848 | 2103 | <b>1975,5</b> |
| CBX5     | -0,214992 | 1,19605   | <b>0,490529</b>  | 1753 | 2201 | <b>1977</b>   |
| TYK2     | 0,50098   | 0,480383  | <b>0,4906815</b> | 1912 | 1531 | <b>1721,5</b> |
| ETV1     | 0,427314  | 0,55405   | <b>0,490682</b>  | 1550 | 2237 | <b>1893,5</b> |
| HMBS     | 0,682313  | 0,299083  | <b>0,490698</b>  | 1713 | 2417 | <b>2065</b>   |
| YIF1A    | 0,49116   | NaN       | <b>0,49116</b>   | 1608 | NaN  | <b>1608</b>   |
| DYNC1LI1 | 0,586267  | 0,396491  | <b>0,491379</b>  | 1510 | 1783 | <b>1646,5</b> |
| PIWIL2   | 0,835444  | 0,147349  | <b>0,4913965</b> | 1207 | 1789 | <b>1498</b>   |
| NCAPD2   | 0,230559  | 0,752282  | <b>0,4914205</b> | 1411 | 1558 | <b>1484,5</b> |
| KANK4    | 0,491476  | NaN       | <b>0,491476</b>  | 1825 | NaN  | <b>1825</b>   |
| ZC3HC1   | 0,726934  | 0,256875  | <b>0,4919045</b> | 1881 | 2746 | <b>2313,5</b> |
| IL18BP   | 0,708875  | 0,275129  | <b>0,492002</b>  | 1355 | 1364 | <b>1359,5</b> |
| SPIN3    | -0,016692 | 1,000833  | <b>0,4920705</b> | 1316 | 1975 | <b>1645,5</b> |
| ZNF622   | 0,442195  | 0,542725  | <b>0,49246</b>   | 1590 | 2277 | <b>1933,5</b> |
| MC3R     | 0,492502  | NaN       | <b>0,492502</b>  | 999  | NaN  | <b>999</b>    |
| GLT6D1   | 0,746357  | 0,23872   | <b>0,4925385</b> | 1441 | 1438 | <b>1439,5</b> |
| SGCG     | 0,492574  | NaN       | <b>0,492574</b>  | 1219 | NaN  | <b>1219</b>   |
| CUL1     | -0,332582 | 1,317871  | <b>0,4926445</b> | 1255 | 1905 | <b>1580</b>   |



|          |           |           |                  |      |      |               |
|----------|-----------|-----------|------------------|------|------|---------------|
| ARHGEF16 | 0,492926  | NaN       | <b>0,492926</b>  | 1515 | NaN  | <b>1515</b>   |
| ZNF33B   | 0,681905  | 0,303969  | <b>0,492937</b>  | 1370 | 1662 | <b>1516</b>   |
| FKBP5    | 0,222336  | 0,763601  | <b>0,4929685</b> | 1598 | 1867 | <b>1732,5</b> |
| APBA2    | 1,26624   | -0,278575 | <b>0,4938325</b> | 1654 | 1884 | <b>1769</b>   |
| KRT1     | 0,915506  | 0,072376  | <b>0,493941</b>  | 1829 | 1906 | <b>1867,5</b> |
| ZNF295   | 0,183547  | 0,805241  | <b>0,494394</b>  | 1991 | 2623 | <b>2307</b>   |
| BORA     | -0,426047 | 1,415345  | <b>0,494649</b>  | 1265 | 1771 | <b>1518</b>   |
| PCCA     | 0,467697  | 0,522775  | <b>0,495236</b>  | 1647 | 2159 | <b>1903</b>   |
| C9orf156 | -0,022452 | 1,013526  | <b>0,495537</b>  | 1750 | 2602 | <b>2176</b>   |
| DMRT3    | 0,903085  | 0,08864   | <b>0,4958625</b> | 1378 | 2445 | <b>1911,5</b> |
| OGN      | 0,780412  | 0,211484  | <b>0,495948</b>  | 1524 | 2228 | <b>1876</b>   |
| CCDC3    | 0,586511  | 0,405758  | <b>0,4961345</b> | 1604 | 2817 | <b>2210,5</b> |
| TUSC3    | 1,175301  | -0,182919 | <b>0,496191</b>  | 1690 | 2961 | <b>2325,5</b> |
| PIH1D2   | 0,496319  | NaN       | <b>0,496319</b>  | 1270 | NaN  | <b>1270</b>   |
| CALY     | 1,128751  | -0,136028 | <b>0,4963615</b> | 1649 | 2362 | <b>2005,5</b> |
| THSD1    | 0,828321  | 0,164794  | <b>0,4965575</b> | 2037 | 2177 | <b>2107</b>   |
| ARHGAP32 | 0,160617  | 0,832673  | <b>0,496645</b>  | 1943 | 2119 | <b>2031</b>   |
| FBXO48   | 0,12147   | 0,872148  | <b>0,496809</b>  | 1314 | 2850 | <b>2082</b>   |
| TOB1     | 1,784152  | -0,790178 | <b>0,496987</b>  | 1181 | 2257 | <b>1719</b>   |
| SULT2B1  | 0,69506   | 0,299529  | <b>0,4972945</b> | 1198 | 1949 | <b>1573,5</b> |
| LSMD1    | 0,898696  | 0,0959    | <b>0,497298</b>  | 1643 | 1559 | <b>1601</b>   |
| TRIM58   | 1,202615  | -0,20791  | <b>0,4973525</b> | 1593 | 1860 | <b>1726,5</b> |
| P4HTM    | NaN       | 0,497632  | <b>0,497632</b>  | NaN  | 2123 | <b>2123</b>   |
| ARHGDIG  | 0,480832  | 0,514815  | <b>0,4978235</b> | 1449 | 2556 | <b>2002,5</b> |
| DEFB110  | 0,624379  | 0,37179   | <b>0,4980845</b> | 1841 | 2229 | <b>2035</b>   |
| OR7D2    | 0,558305  | 0,438388  | <b>0,4983465</b> | 1578 | 2124 | <b>1851</b>   |
| DCAF15   | 0,612331  | 0,384508  | <b>0,4984195</b> | 1845 | 1695 | <b>1770</b>   |
| PAGE3    | 1,129131  | -0,132074 | <b>0,4985285</b> | 1536 | 1768 | <b>1652</b>   |
| CCBL2    | 0,580284  | 0,417038  | <b>0,498661</b>  | 1539 | 1879 | <b>1709</b>   |
| BST1     | 0,943032  | 0,054588  | <b>0,49881</b>   | 1676 | 2191 | <b>1933,5</b> |
| HNRNPD   | 0,448335  | 0,549348  | <b>0,4988415</b> | 1158 | 1698 | <b>1428</b>   |
| NOS1     | 0,380311  | 0,617598  | <b>0,4989545</b> | 1382 | 2378 | <b>1880</b>   |
| KIAA1704 | 0,691104  | 0,307319  | <b>0,4992115</b> | 1686 | 1846 | <b>1766</b>   |
| EPHX4    | 0,422368  | 0,576058  | <b>0,499213</b>  | 1745 | 2383 | <b>2064</b>   |

|          |           |           |                  |      |      |               |
|----------|-----------|-----------|------------------|------|------|---------------|
| POU6F2   | -0,195013 | 1,193481  | <b>0,499234</b>  | 1404 | 1655 | <b>1529,5</b> |
| DNAJB14  | 0,618935  | 0,380132  | <b>0,4995335</b> | 1469 | 1899 | <b>1684</b>   |
| ZNF347   | 0,893999  | 0,105956  | <b>0,4999775</b> | 1521 | 1646 | <b>1583,5</b> |
| H2AFZ    | 0,751492  | 0,248475  | <b>0,4999835</b> | 2210 | 2180 | <b>2195</b>   |
| SLC25A45 | -0,043255 | 1,04343   | <b>0,5000875</b> | 1627 | 2466 | <b>2046,5</b> |
| CHP2     | 1,705171  | -0,704761 | <b>0,500205</b>  | 1450 | 1687 | <b>1568,5</b> |
| TPM3     | 0,0069    | 0,993984  | <b>0,500442</b>  | 1787 | 1945 | <b>1866</b>   |
| KIAA0182 | 0,538536  | 0,462726  | <b>0,500631</b>  | 1607 | 2014 | <b>1810,5</b> |
| AHSA1    | 0,855716  | 0,145548  | <b>0,500632</b>  | 2189 | 1897 | <b>2043</b>   |
| PFKM     | 0,1446    | 0,856806  | <b>0,500703</b>  | 1938 | 2301 | <b>2119,5</b> |
| C22orf23 | 0,762173  | 0,239294  | <b>0,5007335</b> | 2014 | 2350 | <b>2182</b>   |
| PYCARD   | 0,738301  | 0,263233  | <b>0,500767</b>  | 702  | 1378 | <b>1040</b>   |
| MRPL2    | -0,046471 | 1,048072  | <b>0,5008005</b> | 1693 | 2096 | <b>1894,5</b> |
| HAPLN3   | 0,50083   | NaN       | <b>0,50083</b>   | 1576 | NaN  | <b>1576</b>   |
| C11orf82 | 0,819251  | 0,182783  | <b>0,501017</b>  | 1694 | 1722 | <b>1708</b>   |
| MAGEC1   | 0,534368  | 0,467897  | <b>0,5011325</b> | 1399 | 1828 | <b>1613,5</b> |
| C19orf69 | 0,501142  | NaN       | <b>0,501142</b>  | 1539 | NaN  | <b>1539</b>   |
| LMCD1    | 0,501293  | NaN       | <b>0,501293</b>  | 1695 | NaN  | <b>1695</b>   |
| PCDH10   | 0,692556  | 0,311141  | <b>0,5018485</b> | 1245 | 1547 | <b>1396</b>   |
| DTX3L    | 0,683738  | 0,320039  | <b>0,5018885</b> | 1518 | 2433 | <b>1975,5</b> |
| CLDN12   | 0,285604  | 0,718464  | <b>0,502034</b>  | 1898 | 1656 | <b>1777</b>   |
| DRGX     | 0,860291  | 0,145284  | <b>0,5027875</b> | 1348 | 2039 | <b>1693,5</b> |
| CAP1     | 0,441793  | 0,56419   | <b>0,5029915</b> | 958  | 1682 | <b>1320</b>   |
| CYTIP    | 0,503186  | NaN       | <b>0,503186</b>  | 1978 | NaN  | <b>1978</b>   |
| TMC6     | 1,476361  | -0,469695 | <b>0,503333</b>  | 1633 | 1688 | <b>1660,5</b> |
| DNAJC19  | 0,351882  | 0,654932  | <b>0,503407</b>  | 1119 | 1422 | <b>1270,5</b> |
| APLF     | 0,737792  | 0,26943   | <b>0,503611</b>  | 1606 | 1878 | <b>1742</b>   |
| PKD1L3   | -0,308692 | 1,316183  | <b>0,5037455</b> | 1591 | 2082 | <b>1836,5</b> |
| LRRC37A3 | 0,504102  | NaN       | <b>0,504102</b>  | 1851 | NaN  | <b>1851</b>   |
| ZNF485   | -0,049722 | 1,058544  | <b>0,504411</b>  | 1519 | 1682 | <b>1600,5</b> |
| NUP133   | 0,388947  | 0,620274  | <b>0,5046105</b> | 1469 | 1659 | <b>1564</b>   |
| CNPPD1   | 0,505075  | NaN       | <b>0,505075</b>  | 1013 | NaN  | <b>1013</b>   |
| IFNW1    | 0,505089  | NaN       | <b>0,505089</b>  | 903  | NaN  | <b>903</b>    |
| ISX      | 0,505223  | NaN       | <b>0,505223</b>  | 2064 | NaN  | <b>2064</b>   |

|          |           |           |                  |      |      |               |
|----------|-----------|-----------|------------------|------|------|---------------|
| C8orf86  | 0,495657  | 0,514984  | <b>0,5053205</b> | 1811 | 1746 | <b>1778,5</b> |
| PLD6     | 0,505668  | NaN       | <b>0,505668</b>  | 1315 | NaN  | <b>1315</b>   |
| ELOVL1   | 0,505869  | NaN       | <b>0,505869</b>  | 1745 | NaN  | <b>1745</b>   |
| N4BP2L2  | 0,505902  | NaN       | <b>0,505902</b>  | 1754 | NaN  | <b>1754</b>   |
| INPP5D   | 0,264966  | 0,747941  | <b>0,5064535</b> | 1303 | 2108 | <b>1705,5</b> |
| FBP2     | 1,053067  | -0,039884 | <b>0,5065915</b> | 1759 | 2330 | <b>2044,5</b> |
| RUNX3    | 0,081551  | 0,932253  | <b>0,506902</b>  | 1599 | 2549 | <b>2074</b>   |
| AKAP4    | 0,057755  | 0,956343  | <b>0,507049</b>  | 1690 | 2147 | <b>1918,5</b> |
| GHDC     | 0,507103  | NaN       | <b>0,507103</b>  | 1771 | NaN  | <b>1771</b>   |
| CCR7     | 0,507116  | NaN       | <b>0,507116</b>  | 1729 | NaN  | <b>1729</b>   |
| SGMS1    | 1,357317  | -0,342993 | <b>0,507162</b>  | 1331 | 2134 | <b>1732,5</b> |
| EDNRB    | 0,428261  | 0,586301  | <b>0,507281</b>  | 2383 | 2076 | <b>2229,5</b> |
| KRTAP1-3 | 0,727601  | 0,286987  | <b>0,507294</b>  | 1656 | 1631 | <b>1643,5</b> |
| PLEKHM3  | 0,480526  | 0,534135  | <b>0,5073305</b> | 1261 | 1992 | <b>1626,5</b> |
| MLF2     | 0,79265   | 0,222071  | <b>0,5073605</b> | 1586 | 1953 | <b>1769,5</b> |
| USH2A    | 0,434282  | 0,580752  | <b>0,507517</b>  | 1593 | 995  | <b>1294</b>   |
| DDX53    | 1,179697  | -0,164449 | <b>0,507624</b>  | 2191 | 2196 | <b>2193,5</b> |
| PLEKHG4B | 1,048444  | -0,032444 | <b>0,508</b>     | 1527 | 1778 | <b>1652,5</b> |
| FOXB2    | 0,508076  | NaN       | <b>0,508076</b>  | 1075 | NaN  | <b>1075</b>   |
| TBR1     | 0,37927   | 0,636953  | <b>0,5081115</b> | 1602 | 2374 | <b>1988</b>   |
| SLC27A6  | NaN       | 0,508115  | <b>0,508115</b>  | NaN  | 2534 | <b>2534</b>   |
| TCN2     | 0,286286  | 0,730167  | <b>0,5082265</b> | 1807 | 1852 | <b>1829,5</b> |
| NIPAL3   | 0,14481   | 0,872074  | <b>0,508442</b>  | 1783 | 2199 | <b>1991</b>   |
| GPR143   | -0,912641 | 1,930088  | <b>0,5087235</b> | 1417 | 1925 | <b>1671</b>   |
| RXFP1    | 0,50877   | NaN       | <b>0,50877</b>   | 1546 | NaN  | <b>1546</b>   |
| TXNDC11  | 0,593532  | 0,424825  | <b>0,5091785</b> | 1531 | 1540 | <b>1535,5</b> |
| FHOD3    | 0,575454  | 0,442985  | <b>0,5092195</b> | 1865 | 2636 | <b>2250,5</b> |
| SUFU     | NaN       | 0,509313  | <b>0,509313</b>  | NaN  | 2738 | <b>2738</b>   |
| CHURC1   | -0,122918 | 1,141599  | <b>0,5093405</b> | 1271 | 1419 | <b>1345</b>   |
| MMP28    | 0,910433  | 0,109252  | <b>0,5098425</b> | 2029 | 2718 | <b>2373,5</b> |
| IQCA1    | 1,118943  | -0,099114 | <b>0,5099145</b> | 1435 | 1917 | <b>1676</b>   |
| GRIA1    | 0,835426  | 0,184811  | <b>0,5101185</b> | 1797 | 2506 | <b>2151,5</b> |
| KPNA3    | -0,264911 | 1,285319  | <b>0,510204</b>  | 1380 | 2349 | <b>1864,5</b> |
| ANKRD35  | 0,161129  | 0,859334  | <b>0,5102315</b> | 1579 | 2495 | <b>2037</b>   |

|           |           |           |                  |      |      |               |
|-----------|-----------|-----------|------------------|------|------|---------------|
| HNRPLL    | 0,51046   | NaN       | <b>0,51046</b>   | 1534 | NaN  | <b>1534</b>   |
| CLEC4G    | 0,510532  | NaN       | <b>0,510532</b>  | 1641 | NaN  | <b>1641</b>   |
| PLA2G5    | -0,489647 | 1,511332  | <b>0,5108425</b> | 1492 | 2376 | <b>1934</b>   |
| OR7A10    | 0,398287  | 0,624227  | <b>0,511257</b>  | 1859 | 2026 | <b>1942,5</b> |
| CCT3      | -0,036178 | 1,058784  | <b>0,511303</b>  | 1599 | 1626 | <b>1612,5</b> |
| HEPACAM2  | 0,406102  | 0,617126  | <b>0,511614</b>  | 1206 | 2298 | <b>1752</b>   |
| OR56A1    | 0,761907  | 0,261414  | <b>0,5116605</b> | 1657 | 1865 | <b>1761</b>   |
| UBL4A     | 0,417942  | 0,605437  | <b>0,5116895</b> | 1793 | 1741 | <b>1767</b>   |
| THEM4     | 1,214896  | -0,19077  | <b>0,512063</b>  | 1651 | 2144 | <b>1897,5</b> |
| LRRK2     | 0,377016  | 0,647454  | <b>0,512235</b>  | 2148 | 2027 | <b>2087,5</b> |
| PCNX      | 0,756146  | 0,268597  | <b>0,5123715</b> | 1630 | 2218 | <b>1924</b>   |
| SSH1      | 0,762829  | 0,262149  | <b>0,512489</b>  | 1683 | 2134 | <b>1908,5</b> |
| GAS7      | 1,1872    | -0,161659 | <b>0,5127705</b> | 1967 | 2833 | <b>2400</b>   |
| KIAA1683  | 0,598671  | 0,426888  | <b>0,5127795</b> | 2001 | 2457 | <b>2229</b>   |
| KIAA2026  | 1,045338  | -0,019105 | <b>0,5131165</b> | 1743 | 2244 | <b>1993,5</b> |
| ZMYM4     | 0,513415  | NaN       | <b>0,513415</b>  | 2314 | NaN  | <b>2314</b>   |
| UHRF1BP1L | 0,513799  | NaN       | <b>0,513799</b>  | 1403 | NaN  | <b>1403</b>   |
| C17orf46  | 0,513988  | NaN       | <b>0,513988</b>  | 1397 | NaN  | <b>1397</b>   |
| DNAJC8    | 0,72413   | 0,303956  | <b>0,514043</b>  | 1583 | 2203 | <b>1893</b>   |
| RAB3IP    | 0,635041  | 0,393235  | <b>0,514138</b>  | 1760 | 2298 | <b>2029</b>   |
| PAX4      | 0,442804  | 0,585881  | <b>0,5143425</b> | 1653 | 2308 | <b>1980,5</b> |
| CDS2      | NaN       | 0,514544  | <b>0,514544</b>  | NaN  | 2914 | <b>2914</b>   |
| PAGE5     | 0,980528  | 0,048693  | <b>0,5146105</b> | 1546 | 2045 | <b>1795,5</b> |
| PTPRA     | 0,913537  | 0,115972  | <b>0,5147545</b> | 1592 | 2288 | <b>1940</b>   |
| ZKSCAN5   | 1,031846  | -0,001234 | <b>0,515306</b>  | 1492 | 2083 | <b>1787,5</b> |
| RPS27L    | 1,281561  | -0,250465 | <b>0,515548</b>  | 1661 | 3117 | <b>2389</b>   |
| PRRG1     | 0,515551  | NaN       | <b>0,515551</b>  | 1213 | NaN  | <b>1213</b>   |
| SLCO4A1   | 1,002899  | 0,028368  | <b>0,5156335</b> | 1866 | 2935 | <b>2400,5</b> |
| ZNF200    | 0,587886  | 0,446115  | <b>0,5170005</b> | 1685 | 2293 | <b>1989</b>   |
| SLC6A16   | 0,467696  | 0,566598  | <b>0,517147</b>  | 1589 | 3083 | <b>2336</b>   |
| CD58      | 0,832698  | 0,201768  | <b>0,517233</b>  | 2147 | 2249 | <b>2198</b>   |
| BICD1     | 0,903199  | 0,131308  | <b>0,5172535</b> | 1689 | 2504 | <b>2096,5</b> |
| SHCBP1L   | 1,612127  | -0,577558 | <b>0,5172845</b> | 1544 | 1806 | <b>1675</b>   |
| S100A12   | 0,535856  | 0,498858  | <b>0,517357</b>  | 1443 | 2010 | <b>1726,5</b> |

|          |           |           |                  |      |      |               |
|----------|-----------|-----------|------------------|------|------|---------------|
| REEP2    | 0,332918  | 0,701797  | <b>0,5173575</b> | 1261 | 1805 | <b>1533</b>   |
| PINK1    | 0,413129  | 0,622009  | <b>0,517569</b>  | 1766 | 2065 | <b>1915,5</b> |
| TRMT1    | 0,581366  | 0,453911  | <b>0,5176385</b> | 1564 | 2251 | <b>1907,5</b> |
| ZNF821   | 0,297626  | 0,738395  | <b>0,5180105</b> | 1963 | 2025 | <b>1994</b>   |
| WISP2    | 0,795797  | 0,24042   | <b>0,5181085</b> | 1349 | 1641 | <b>1495</b>   |
| GPATCH1  | 0,518175  | NaN       | <b>0,518175</b>  | 1519 | NaN  | <b>1519</b>   |
| FAM82A2  | 0,518669  | NaN       | <b>0,518669</b>  | 1630 | NaN  | <b>1630</b>   |
| LEMD3    | 0,518777  | NaN       | <b>0,518777</b>  | 1578 | NaN  | <b>1578</b>   |
| MPZ      | 0,545081  | 0,492482  | <b>0,5187815</b> | 2025 | 2371 | <b>2198</b>   |
| KRT7     | 0,518785  | NaN       | <b>0,518785</b>  | 1866 | NaN  | <b>1866</b>   |
| IPO9     | -0,003444 | 1,041129  | <b>0,5188425</b> | 1652 | 2036 | <b>1844</b>   |
| CXorf36  | 0,518881  | NaN       | <b>0,518881</b>  | 2011 | NaN  | <b>2011</b>   |
| 03-sept  | 1,42639   | -0,388593 | <b>0,5188985</b> | 1350 | 1761 | <b>1555,5</b> |
| KRT25    | 0,042598  | 0,995428  | <b>0,519013</b>  | 2183 | 2873 | <b>2528</b>   |
| PHAX     | 0,765201  | 0,272828  | <b>0,5190145</b> | 2175 | 1933 | <b>2054</b>   |
| TTYH1    | 0,338346  | 0,699826  | <b>0,519086</b>  | 2139 | 2581 | <b>2360</b>   |
| NFATC2IP | 0,519247  | NaN       | <b>0,519247</b>  | 1795 | NaN  | <b>1795</b>   |
| STAMBP   | 0,863754  | 0,174979  | <b>0,5193665</b> | 1346 | 1928 | <b>1637</b>   |
| PYGM     | -0,020952 | 1,060443  | <b>0,5197455</b> | 2080 | 2441 | <b>2260,5</b> |
| RAB3B    | -0,234156 | 1,275018  | <b>0,520431</b>  | 1362 | 2527 | <b>1944,5</b> |
| ACRC     | 0,98366   | 0,057494  | <b>0,520577</b>  | 2478 | 1841 | <b>2159,5</b> |
| SLC8A3   | 0,639296  | 0,402053  | <b>0,5206745</b> | 1594 | 2997 | <b>2295,5</b> |
| MGAT4A   | -0,22586  | 1,268159  | <b>0,5211495</b> | 1872 | 2114 | <b>1993</b>   |
| SLIT2    | 0,943974  | 0,098749  | <b>0,5213615</b> | 1833 | 2322 | <b>2077,5</b> |
| ZNF367   | 1,118139  | -0,075311 | <b>0,521414</b>  | 1646 | 1908 | <b>1777</b>   |
| GAA      | 0,321141  | 0,721804  | <b>0,5214725</b> | 1268 | 2037 | <b>1652,5</b> |
| SPC25    | 0,140378  | 0,902624  | <b>0,521501</b>  | 1082 | 1273 | <b>1177,5</b> |
| C6orf58  | 0,08733   | 0,955958  | <b>0,521644</b>  | 1600 | 1871 | <b>1735,5</b> |
| CLN6     | 0,058936  | 0,984549  | <b>0,5217425</b> | 1513 | 2798 | <b>2155,5</b> |
| C11orf58 | 0,633696  | 0,409814  | <b>0,521755</b>  | 1741 | 2589 | <b>2165</b>   |
| SPRYD4   | 0,540241  | 0,503998  | <b>0,5221195</b> | 1844 | 2031 | <b>1937,5</b> |
| MITP     | -0,175137 | 1,219485  | <b>0,522174</b>  | 1781 | 2337 | <b>2059</b>   |
| LAMC3    | 0,010817  | 1,033762  | <b>0,5222895</b> | 1835 | 2343 | <b>2089</b>   |
| SRSF7    | 0,522353  | NaN       | <b>0,522353</b>  | 1336 | NaN  | <b>1336</b>   |

|           |           |           |                  |      |      |               |
|-----------|-----------|-----------|------------------|------|------|---------------|
| PRRG2     | -0,471582 | 1,516549  | <b>0,5224835</b> | 1517 | 1709 | <b>1613</b>   |
| DCTN4     | 0,522664  | NaN       | <b>0,522664</b>  | 1646 | NaN  | <b>1646</b>   |
| EPB41L4B  | 0,740565  | 0,304801  | <b>0,522683</b>  | 1576 | 2138 | <b>1857</b>   |
| FAM26E    | 0,56571   | 0,479708  | <b>0,522709</b>  | 1726 | 2490 | <b>2108</b>   |
| YIPF6     | 0,216342  | 0,829286  | <b>0,522814</b>  | 1698 | 1963 | <b>1830,5</b> |
| CYLC1     | 0,529963  | 0,515955  | <b>0,522959</b>  | 2184 | 2368 | <b>2276</b>   |
| DNA2      | 1,387229  | -0,340985 | <b>0,523122</b>  | 1120 | 1990 | <b>1555</b>   |
| GPR144    | 0,523376  | NaN       | <b>0,523376</b>  | 1524 | NaN  | <b>1524</b>   |
| VIP       | 0,250025  | 0,796745  | <b>0,523385</b>  | 1541 | 1755 | <b>1648</b>   |
| CYB5A     | 0,461767  | 0,585041  | <b>0,523404</b>  | 1585 | 3114 | <b>2349,5</b> |
| SLITRK5   | 0,972804  | 0,074215  | <b>0,5235095</b> | 2246 | 1978 | <b>2112</b>   |
| CDKN2B    | 0,275965  | 0,771093  | <b>0,523529</b>  | 1680 | 1987 | <b>1833,5</b> |
| HIST1H2BA | 0,523669  | NaN       | <b>0,523669</b>  | 1869 | NaN  | <b>1869</b>   |
| OR52L1    | 1,225451  | -0,178001 | <b>0,523725</b>  | 1245 | 2160 | <b>1702,5</b> |
| MYO1G     | 0,52379   | NaN       | <b>0,52379</b>   | 1909 | NaN  | <b>1909</b>   |
| PNPLA5    | 0,755729  | 0,292206  | <b>0,5239675</b> | 1582 | 1990 | <b>1786</b>   |
| C20orf72  | 0,67634   | 0,372004  | <b>0,524172</b>  | 1863 | 1917 | <b>1890</b>   |
| BRDT      | 0,447631  | 0,601195  | <b>0,524413</b>  | 1022 | 2637 | <b>1829,5</b> |
| AGXT      | 0,30211   | 0,746869  | <b>0,5244895</b> | 1809 | 3105 | <b>2457</b>   |
| WDFY2     | -0,066106 | 1,11583   | <b>0,524862</b>  | 1564 | 1892 | <b>1728</b>   |
| EMP2      | 0,68492   | 0,364919  | <b>0,5249195</b> | 1589 | 1787 | <b>1688</b>   |
| DGKQ      | 0,748116  | 0,302427  | <b>0,5252715</b> | 1682 | 1702 | <b>1692</b>   |
| CRYZL1    | 0,277378  | 0,773321  | <b>0,5253495</b> | 1787 | 1977 | <b>1882</b>   |
| PSMB8     | 1,5043    | -0,453488 | <b>0,525406</b>  | 1830 | 2398 | <b>2114</b>   |
| C2CD2L    | 0,247098  | 0,804004  | <b>0,525551</b>  | 1628 | 2075 | <b>1851,5</b> |
| SRSF4     | -0,036635 | 1,088375  | <b>0,52587</b>   | 1621 | 2417 | <b>2019</b>   |
| USP27X    | 0,635784  | 0,416291  | <b>0,5260375</b> | 1207 | 2051 | <b>1629</b>   |
| PLA2G2F   | 0,513421  | 0,539328  | <b>0,5263745</b> | 1348 | 2008 | <b>1678</b>   |
| EML4      | 0,526469  | NaN       | <b>0,526469</b>  | 1864 | NaN  | <b>1864</b>   |
| ELL       | 0,426514  | 0,626763  | <b>0,5266385</b> | 1244 | 1624 | <b>1434</b>   |
| XIRP1     | 0,526675  | NaN       | <b>0,526675</b>  | 1672 | NaN  | <b>1672</b>   |
| DBT       | 1,172357  | -0,118162 | <b>0,5270975</b> | 2307 | 2182 | <b>2244,5</b> |
| DFNB59    | 1,162372  | -0,107659 | <b>0,5273565</b> | 1722 | 1789 | <b>1755,5</b> |
| TJP1      | -0,292955 | 1,347699  | <b>0,527372</b>  | 1637 | 2033 | <b>1835</b>   |

|           |           |           |                  |      |      |               |
|-----------|-----------|-----------|------------------|------|------|---------------|
| DRD3      | 0,527406  | NaN       | <b>0,527406</b>  | 1632 | NaN  | <b>1632</b>   |
| LCA5L     | 0,527573  | NaN       | <b>0,527573</b>  | 1737 | NaN  | <b>1737</b>   |
| GDAP1     | 0,082051  | 0,973118  | <b>0,5275845</b> | 2028 | 1848 | <b>1938</b>   |
| GCNT7     | 0,606753  | 0,448444  | <b>0,5275985</b> | 1318 | 2290 | <b>1804</b>   |
| DEAF1     | 0,527788  | NaN       | <b>0,527788</b>  | 1444 | NaN  | <b>1444</b>   |
| CEBPE     | 0,447583  | 0,608404  | <b>0,5279935</b> | 1413 | 1719 | <b>1566</b>   |
| HNRNPA2B1 | 1,572241  | -0,516119 | <b>0,528061</b>  | 1508 | 1763 | <b>1635,5</b> |
| CD1C      | -0,687687 | 1,74483   | <b>0,5285715</b> | 1755 | 1973 | <b>1864</b>   |
| ATPIF1    | 0,318821  | 0,738532  | <b>0,5286765</b> | 1306 | 2163 | <b>1734,5</b> |
| CERK      | 1,348172  | -0,290807 | <b>0,5286825</b> | 2073 | 1580 | <b>1826,5</b> |
| B4GALNT3  | 0,672793  | 0,384816  | <b>0,5288045</b> | 1596 | 2395 | <b>1995,5</b> |
| CLC       | 0,696745  | 0,361048  | <b>0,5288965</b> | 1367 | 1990 | <b>1678,5</b> |
| TEPP      | 0,528975  | NaN       | <b>0,528975</b>  | 689  | NaN  | <b>689</b>    |
| TNPO2     | 0,389362  | 0,669496  | <b>0,529429</b>  | 1556 | 2075 | <b>1815,5</b> |
| NASP      | 0,529599  | NaN       | <b>0,529599</b>  | 1835 | NaN  | <b>1835</b>   |
| RBBP9     | 1,171437  | -0,112235 | <b>0,529601</b>  | 1640 | 494  | <b>1067</b>   |
| C20orf197 | 0,577026  | 0,482296  | <b>0,529661</b>  | 2014 | 2293 | <b>2153,5</b> |
| TNPO1     | 0,892582  | 0,167088  | <b>0,529835</b>  | 1068 | 1673 | <b>1370,5</b> |
| FBRS      | 0,530137  | NaN       | <b>0,530137</b>  | 1663 | NaN  | <b>1663</b>   |
| LIPK      | 0,718508  | 0,341967  | <b>0,5302375</b> | 1388 | 2303 | <b>1845,5</b> |
| AZIN1     | 0,013021  | 1,047929  | <b>0,530475</b>  | 1315 | 2174 | <b>1744,5</b> |
| USP15     | 0,411046  | 0,649943  | <b>0,5304945</b> | 1780 | 1945 | <b>1862,5</b> |
| CLEC4D    | 0,626343  | 0,434799  | <b>0,530571</b>  | 1775 | 1676 | <b>1725,5</b> |
| KRTAP13-3 | 1,053927  | 0,007258  | <b>0,5305925</b> | 1287 | 1711 | <b>1499</b>   |
| USP25     | 0,518678  | 0,542966  | <b>0,530822</b>  | 1314 | 1640 | <b>1477</b>   |
| HBXIP     | 0,020177  | 1,041486  | <b>0,5308315</b> | 1400 | 1209 | <b>1304,5</b> |
| ARRDC1    | 1,231077  | -0,169228 | <b>0,5309245</b> | 1681 | 1852 | <b>1766,5</b> |
| DNALI1    | -0,072598 | 1,134486  | <b>0,530944</b>  | 1799 | 2450 | <b>2124,5</b> |
| ZNF583    | 0,894288  | 0,167809  | <b>0,5310485</b> | 1814 | 2361 | <b>2087,5</b> |
| C17orf103 | 0,599379  | 0,462821  | <b>0,5311</b>    | 2045 | 2008 | <b>2026,5</b> |
| NPTX1     | 0,940447  | 0,121812  | <b>0,5311295</b> | 1508 | 1832 | <b>1670</b>   |
| NYX       | -0,380997 | 1,443285  | <b>0,531144</b>  | 820  | 1382 | <b>1101</b>   |
| TSPAN18   | 0,644661  | 0,41792   | <b>0,5312905</b> | 1495 | 1602 | <b>1548,5</b> |
| TRIM35    | 0,582591  | 0,480616  | <b>0,5316035</b> | 1523 | 2275 | <b>1899</b>   |

|           |           |           |                  |      |      |               |
|-----------|-----------|-----------|------------------|------|------|---------------|
| OR8D2     | 0,374365  | 0,689025  | <b>0,531695</b>  | 1488 | 2753 | <b>2120,5</b> |
| OR4A47    | 0,53177   | NaN       | <b>0,53177</b>   | 1550 | NaN  | <b>1550</b>   |
| OR1Q1     | 0,322491  | 0,741463  | <b>0,531977</b>  | 1661 | 2795 | <b>2228</b>   |
| OR52J3    | 0,201209  | 0,862862  | <b>0,5320355</b> | 1401 | 2086 | <b>1743,5</b> |
| ABT1      | 1,509892  | -0,444639 | <b>0,5326265</b> | 2051 | 2189 | <b>2120</b>   |
| CYP4F3    | -0,110594 | 1,177373  | <b>0,5333895</b> | 2292 | 2038 | <b>2165</b>   |
| FITM1     | 0,92662   | 0,140195  | <b>0,5334075</b> | 1526 | 1377 | <b>1451,5</b> |
| PNOC      | -0,069468 | 1,136423  | <b>0,5334775</b> | 2279 | 2442 | <b>2360,5</b> |
| POU3F2    | 0,222487  | 0,844521  | <b>0,533504</b>  | 1791 | 2106 | <b>1948,5</b> |
| TRAPPC3   | 1,45559   | -0,388478 | <b>0,533556</b>  | 1559 | 1903 | <b>1731</b>   |
| APOA5     | 0,785302  | 0,282173  | <b>0,5337375</b> | 1544 | 1370 | <b>1457</b>   |
| TMEM136   | 0,533749  | NaN       | <b>0,533749</b>  | 1464 | NaN  | <b>1464</b>   |
| CD70      | 0,920374  | 0,148125  | <b>0,5342495</b> | 1494 | 1879 | <b>1686,5</b> |
| LYSMD3    | 0,539223  | 0,530763  | <b>0,534993</b>  | 2116 | 1824 | <b>1970</b>   |
| RBMS1     | 1,030238  | 0,039769  | <b>0,5350035</b> | 1850 | 2260 | <b>2055</b>   |
| SYP       | 1,117487  | -0,047459 | <b>0,535014</b>  | 1394 | 1309 | <b>1351,5</b> |
| PNPLA2    | 0,535216  | NaN       | <b>0,535216</b>  | 1789 | NaN  | <b>1789</b>   |
| NAALADL1  | 0,633244  | 0,438094  | <b>0,535669</b>  | 1656 | 2214 | <b>1935</b>   |
| PKD1L2    | 0,125415  | 0,946366  | <b>0,5358905</b> | 1806 | 2160 | <b>1983</b>   |
| TMTC3     | 0,542021  | 0,529832  | <b>0,5359265</b> | 2025 | 2379 | <b>2202</b>   |
| PIGZ      | 0,750409  | 0,321975  | <b>0,536192</b>  | 1585 | 1596 | <b>1590,5</b> |
| ZBTB40    | -0,422091 | 1,494689  | <b>0,536299</b>  | 1792 | 2911 | <b>2351,5</b> |
| FEM1C     | 0,796073  | 0,276664  | <b>0,5363685</b> | 1497 | 1632 | <b>1564,5</b> |
| GNAI3     | 0,504074  | 0,568869  | <b>0,5364715</b> | 617  | 1049 | <b>833</b>    |
| PRICKLE1  | 0,826361  | 0,246735  | <b>0,536548</b>  | 1616 | 2728 | <b>2172</b>   |
| GPR126    | 0,536861  | NaN       | <b>0,536861</b>  | 2113 | NaN  | <b>2113</b>   |
| ELMO1     | 0,843545  | 0,230213  | <b>0,536879</b>  | 1879 | 2846 | <b>2362,5</b> |
| IPO7      | 0,082192  | 0,992139  | <b>0,5371655</b> | 1527 | 2198 | <b>1862,5</b> |
| C20orf166 | 0,415098  | 0,659304  | <b>0,537201</b>  | 1862 | 2472 | <b>2167</b>   |
| LRTM2     | 0,916079  | 0,158439  | <b>0,537259</b>  | 2027 | 2403 | <b>2215</b>   |
| QRSL1     | 0,789025  | 0,286159  | <b>0,537592</b>  | 1207 | 1765 | <b>1486</b>   |
| MRPL33    | 0,49267   | 0,583871  | <b>0,5382705</b> | 1704 | 2590 | <b>2147</b>   |
| KDM4A     | 0,840851  | 0,23644   | <b>0,5386455</b> | 1392 | 1372 | <b>1382</b>   |
| LPHN2     | 0,538831  | NaN       | <b>0,538831</b>  | 1540 | NaN  | <b>1540</b>   |



|          |           |           |                  |      |      |               |
|----------|-----------|-----------|------------------|------|------|---------------|
| ANKRD28  | 0,793686  | 0,284171  | <b>0,5389285</b> | 1727 | 2089 | <b>1908</b>   |
| ZFP41    | 0,524315  | 0,553697  | <b>0,539006</b>  | 1906 | 2440 | <b>2173</b>   |
| NKIRAS1  | 1,382412  | -0,303429 | <b>0,5394915</b> | 1201 | 1962 | <b>1581,5</b> |
| ANKRD57  | 0,539651  | NaN       | <b>0,539651</b>  | 2372 | NaN  | <b>2372</b>   |
| CHCHD6   | 0,79178   | 0,287544  | <b>0,539662</b>  | 1539 | 2018 | <b>1778,5</b> |
| BCAT2    | 0,905995  | 0,173878  | <b>0,5399365</b> | 1814 | 2732 | <b>2273</b>   |
| RGP1     | 1,312159  | -0,231879 | <b>0,54014</b>   | 1646 | 1448 | <b>1547</b>   |
| SPG21    | 0,540266  | NaN       | <b>0,540266</b>  | 1630 | NaN  | <b>1630</b>   |
| MRGPRX4  | -0,687347 | 1,76797   | <b>0,5403115</b> | 2061 | 2174 | <b>2117,5</b> |
| SLC1A4   | 1,122634  | -0,041618 | <b>0,540508</b>  | 1235 | 1746 | <b>1490,5</b> |
| ESX1     | 0,711944  | 0,369236  | <b>0,54059</b>   | 1658 | 2045 | <b>1851,5</b> |
| C6orf191 | 0,540736  | NaN       | <b>0,540736</b>  | 2081 | NaN  | <b>2081</b>   |
| MMS22L   | 1,186183  | -0,102741 | <b>0,541721</b>  | 1447 | 1465 | <b>1456</b>   |
| PAX3     | 0,562778  | 0,520894  | <b>0,541836</b>  | 1201 | 2165 | <b>1683</b>   |
| ACBD4    | 0,660177  | 0,42381   | <b>0,5419935</b> | 1612 | 1561 | <b>1586,5</b> |
| FGFBP3   | -0,036069 | 1,120594  | <b>0,5422625</b> | 1486 | 2033 | <b>1759,5</b> |
| KCNH1    | -0,386291 | 1,470998  | <b>0,5423535</b> | 1845 | 2119 | <b>1982</b>   |
| RNF121   | 1,305287  | -0,220249 | <b>0,542519</b>  | 1347 | 2291 | <b>1819</b>   |
| CENPA    | 0,442145  | 0,643132  | <b>0,5426385</b> | 1779 | 1515 | <b>1647</b>   |
| MCM7     | 0,461747  | 0,623873  | <b>0,54281</b>   | 1695 | 1903 | <b>1799</b>   |
| MAZ      | 0,732734  | 0,352962  | <b>0,542848</b>  | 1596 | 2715 | <b>2155,5</b> |
| PYDC1    | 0,662075  | 0,423956  | <b>0,5430155</b> | 1262 | 1589 | <b>1425,5</b> |
| UBAC2    | 0,543554  | NaN       | <b>0,543554</b>  | 1388 | NaN  | <b>1388</b>   |
| ARID3C   | 0,350162  | 0,737586  | <b>0,543874</b>  | 1198 | 2179 | <b>1688,5</b> |
| PAH      | 0,805245  | 0,282673  | <b>0,543959</b>  | 1921 | 2800 | <b>2360,5</b> |
| SREK1    | 0,715395  | 0,372668  | <b>0,5440315</b> | 1527 | 2187 | <b>1857</b>   |
| PTX3     | 0,598222  | 0,490342  | <b>0,544282</b>  | 1597 | 1806 | <b>1701,5</b> |
| STRA13   | 0,541301  | 0,547312  | <b>0,5443065</b> | 1461 | 2084 | <b>1772,5</b> |
| ENDOU    | -0,079142 | 1,168214  | <b>0,544536</b>  | 1282 | 1788 | <b>1535</b>   |
| AUP1     | 1,008542  | 0,081028  | <b>0,544785</b>  | 1857 | 1906 | <b>1881,5</b> |
| H2BFWT   | 0,040497  | 1,049245  | <b>0,544871</b>  | 1587 | 2108 | <b>1847,5</b> |
| ZNF496   | 0,662324  | 0,427914  | <b>0,545119</b>  | 1494 | 1228 | <b>1361</b>   |
| TPRN     | 0,827218  | 0,263175  | <b>0,5451965</b> | 2007 | 2355 | <b>2181</b>   |
| ADCK1    | 1,227901  | -0,13724  | <b>0,5453305</b> | 1833 | 2037 | <b>1935</b>   |

|          |           |           |                  |      |      |               |
|----------|-----------|-----------|------------------|------|------|---------------|
| RNASEH2A | 0,514471  | 0,576388  | <b>0,5454295</b> | 1609 | 2198 | <b>1903,5</b> |
| PFKFB4   | 1,284595  | -0,19338  | <b>0,5456075</b> | 1736 | 1913 | <b>1824,5</b> |
| TMEM64   | 0,749132  | 0,342428  | <b>0,54578</b>   | 1532 | 2535 | <b>2033,5</b> |
| ITIH5L   | -0,160194 | 1,251876  | <b>0,545841</b>  | 1886 | 1829 | <b>1857,5</b> |
| CREB1    | 1,255852  | -0,163746 | <b>0,546053</b>  | 1927 | 2482 | <b>2204,5</b> |
| CDC14A   | 1,089875  | 0,002893  | <b>0,546384</b>  | 663  | 1677 | <b>1170</b>   |
| DTX4     | 0,580008  | 0,513414  | <b>0,546711</b>  | 1285 | 2185 | <b>1735</b>   |
| RPS6KA5  | 0,652356  | 0,441373  | <b>0,5468645</b> | 1680 | 2272 | <b>1976</b>   |
| CCT8     | 0,472569  | 0,621637  | <b>0,547103</b>  | 909  | 1551 | <b>1230</b>   |
| ADRA1A   | 0,54731   | NaN       | <b>0,54731</b>   | 1642 | NaN  | <b>1642</b>   |
| PNN      | 0,696206  | 0,398785  | <b>0,5474955</b> | 1411 | 1739 | <b>1575</b>   |
| PAPSS1   | 0,845978  | 0,249142  | <b>0,54756</b>   | 2159 | 1901 | <b>2030</b>   |
| TTC5     | -0,219948 | 1,31589   | <b>0,547971</b>  | 1606 | 2203 | <b>1904,5</b> |
| MAP4K1   | 0,769093  | 0,326947  | <b>0,54802</b>   | 1226 | 1714 | <b>1470</b>   |
| ADAM17   | 0,568097  | 0,52813   | <b>0,5481135</b> | 2002 | 2395 | <b>2198,5</b> |
| BROX     | 0,54821   | NaN       | <b>0,54821</b>   | 1771 | NaN  | <b>1771</b>   |
| MCC      | 0,883083  | 0,213417  | <b>0,54825</b>   | 1182 | 1788 | <b>1485</b>   |
| SSU72    | 0,548478  | NaN       | <b>0,548478</b>  | 1884 | NaN  | <b>1884</b>   |
| SFXN2    | 1,673375  | -0,575951 | <b>0,548712</b>  | 1360 | 1563 | <b>1461,5</b> |
| QPCTL    | 1,104517  | -0,006638 | <b>0,5489395</b> | 1549 | 1663 | <b>1606</b>   |
| TSG101   | 1,134956  | -0,03655  | <b>0,549203</b>  | 1621 | 2531 | <b>2076</b>   |
| YIPF1    | 0,761754  | 0,33719   | <b>0,549472</b>  | 1854 | 1883 | <b>1868,5</b> |
| SUMO2    | 0,896288  | 0,203243  | <b>0,5497655</b> | 2030 | 2528 | <b>2279</b>   |
| ACBD3    | -0,019523 | 1,11925   | <b>0,5498635</b> | 1763 | 1905 | <b>1834</b>   |
| RAMP2    | 0,655522  | 0,444644  | <b>0,550083</b>  | 1075 | 1206 | <b>1140,5</b> |
| PDAP1    | 0,639303  | 0,460898  | <b>0,5501005</b> | 2091 | 2171 | <b>2131</b>   |
| TPR      | -0,333752 | 1,434044  | <b>0,550146</b>  | 1912 | 2342 | <b>2127</b>   |
| FPR1     | 0,550283  | NaN       | <b>0,550283</b>  | 1871 | NaN  | <b>1871</b>   |
| SOAT1    | 0,758748  | 0,343188  | <b>0,550968</b>  | 1211 | 1888 | <b>1549,5</b> |
| NDNL2    | 0,957523  | 0,144462  | <b>0,5509925</b> | 1317 | 1703 | <b>1510</b>   |
| FAM208A  | 0,284795  | 0,817244  | <b>0,5510195</b> | 1906 | 1895 | <b>1900,5</b> |
| RBM18    | 0,488378  | 0,61439   | <b>0,551384</b>  | 1939 | 2475 | <b>2207</b>   |
| ITGAE    | 0,58188   | 0,521138  | <b>0,551509</b>  | 1825 | 2748 | <b>2286,5</b> |
| GNG4     | 0,487631  | 0,61542   | <b>0,5515255</b> | 1467 | 2063 | <b>1765</b>   |

|           |           |           |                  |      |      |               |
|-----------|-----------|-----------|------------------|------|------|---------------|
| HIGD1A    | 0,101074  | 1,002504  | <b>0,551789</b>  | 2139 | 2853 | <b>2496</b>   |
| DCAF12    | 1,043136  | 0,06075   | <b>0,551943</b>  | 1923 | 2216 | <b>2069,5</b> |
| CPNE6     | 1,189845  | -0,085927 | <b>0,551959</b>  | 1200 | 2019 | <b>1609,5</b> |
| ZNF581    | 0,75397   | 0,350051  | <b>0,5520105</b> | 1498 | 1862 | <b>1680</b>   |
| MYOCD     | 0,635089  | 0,469187  | <b>0,552138</b>  | 1712 | 2648 | <b>2180</b>   |
| CCDC63    | 0,687597  | 0,416726  | <b>0,5521615</b> | 1561 | 2326 | <b>1943,5</b> |
| CINP      | 0,822631  | 0,28181   | <b>0,5522205</b> | 1072 | 2403 | <b>1737,5</b> |
| SNX7      | 0,472243  | 0,632405  | <b>0,552324</b>  | 1618 | 1368 | <b>1493</b>   |
| SNX32     | 0,552351  | NaN       | <b>0,552351</b>  | 1460 | NaN  | <b>1460</b>   |
| ACP6      | 0,642445  | 0,462618  | <b>0,5525315</b> | 1835 | 2052 | <b>1943,5</b> |
| FABP9     | -0,750498 | 1,855601  | <b>0,5525515</b> | 1735 | 2209 | <b>1972</b>   |
| SDHAF1    | 0,654246  | 0,451055  | <b>0,5526505</b> | 791  | 2244 | <b>1517,5</b> |
| SPINK7    | 0,93515   | 0,170535  | <b>0,5528425</b> | 1788 | 2188 | <b>1988</b>   |
| RBBP8     | 0,553338  | NaN       | <b>0,553338</b>  | 1169 | NaN  | <b>1169</b>   |
| LRRTM4    | 0,298068  | 0,808633  | <b>0,5533505</b> | 1471 | 1884 | <b>1677,5</b> |
| EDDM3A    | 0,892895  | 0,214263  | <b>0,553579</b>  | 2120 | 2058 | <b>2089</b>   |
| FLNA      | -0,245621 | 1,352792  | <b>0,5535855</b> | 1814 | 2121 | <b>1967,5</b> |
| C14orf177 | 0,554197  | NaN       | <b>0,554197</b>  | 1823 | NaN  | <b>1823</b>   |
| FANCM     | 0,222677  | 0,885992  | <b>0,5543345</b> | 932  | 1452 | <b>1192</b>   |
| RTN4      | -0,189454 | 1,298268  | <b>0,554407</b>  | 1927 | 2183 | <b>2055</b>   |
| HCP5      | 0,099105  | 1,010041  | <b>0,554573</b>  | 1577 | 2113 | <b>1845</b>   |
| MRPS17    | 0,112346  | 0,9969    | <b>0,554623</b>  | 1237 | 2165 | <b>1701</b>   |
| NRM       | -0,012576 | 1,121912  | <b>0,554668</b>  | 1518 | 1547 | <b>1532,5</b> |
| FASTK     | 1,213547  | -0,104079 | <b>0,554734</b>  | 1830 | 1811 | <b>1820,5</b> |
| RAX2      | 0,554834  | NaN       | <b>0,554834</b>  | 1485 | NaN  | <b>1485</b>   |
| AMPD3     | 0,865984  | 0,243812  | <b>0,554898</b>  | 1749 | 2787 | <b>2268</b>   |
| C6orf145  | 0,554944  | NaN       | <b>0,554944</b>  | 1206 | NaN  | <b>1206</b>   |
| MMRN2     | 0,094814  | 1,015253  | <b>0,5550335</b> | 1947 | 2117 | <b>2032</b>   |
| ANK2      | 1,822004  | -0,711814 | <b>0,555095</b>  | 1258 | 2053 | <b>1655,5</b> |
| C5orf41   | 0,622605  | 0,487603  | <b>0,555104</b>  | 2413 | 2352 | <b>2382,5</b> |
| TMEM56    | 0,555367  | NaN       | <b>0,555367</b>  | 2054 | NaN  | <b>2054</b>   |
| C16orf82  | 0,61057   | 0,501349  | <b>0,5559595</b> | 1818 | 2603 | <b>2210,5</b> |
| CCL19     | 1,138606  | -0,026515 | <b>0,5560455</b> | 1542 | 2061 | <b>1801,5</b> |
| MRPL50    | 0,777809  | 0,334323  | <b>0,556066</b>  | 1928 | 1846 | <b>1887</b>   |

|          |           |           |                  |      |      |               |
|----------|-----------|-----------|------------------|------|------|---------------|
| ZNF490   | 0,436173  | 0,675996  | <b>0,5560845</b> | 2042 | 2049 | <b>2045,5</b> |
| PXK      | 0,512285  | 0,600359  | <b>0,556322</b>  | 2292 | 2376 | <b>2334</b>   |
| CASP14   | 0,838833  | 0,273845  | <b>0,556339</b>  | 1423 | 2039 | <b>1731</b>   |
| GALNT12  | 0,521234  | 0,59147   | <b>0,556352</b>  | 1704 | 2044 | <b>1874</b>   |
| ITGA7    | -0,173018 | 1,285966  | <b>0,556474</b>  | 1210 | 2082 | <b>1646</b>   |
| ARHGEF7  | 0,894678  | 0,219036  | <b>0,556857</b>  | 1208 | 1487 | <b>1347,5</b> |
| SPAG4    | 0,780276  | 0,333525  | <b>0,5569005</b> | 2131 | 2363 | <b>2247</b>   |
| CALCRL   | 0,556908  | NaN       | <b>0,556908</b>  | 1970 | NaN  | <b>1970</b>   |
| MESP1    | 0,574227  | 0,539898  | <b>0,5570625</b> | 2433 | 2407 | <b>2420</b>   |
| RNPC3    | 1,079855  | 0,034901  | <b>0,557378</b>  | 1103 | 1341 | <b>1222</b>   |
| DMRTA1   | 0,594106  | 0,521202  | <b>0,557654</b>  | 1697 | 2453 | <b>2075</b>   |
| SYT5     | 0,434374  | 0,681305  | <b>0,5578395</b> | 1614 | 1833 | <b>1723,5</b> |
| SCGBL    | 0,558637  | NaN       | <b>0,558637</b>  | 1524 | NaN  | <b>1524</b>   |
| LYSMD2   | 1,369518  | -0,250495 | <b>0,5595115</b> | 2151 | 1926 | <b>2038,5</b> |
| SPATA6   | 0,55973   | NaN       | <b>0,55973</b>   | 1762 | NaN  | <b>1762</b>   |
| PIIP5K1  | 0,663282  | 0,456276  | <b>0,559779</b>  | 1490 | 2447 | <b>1968,5</b> |
| ALPK1    | 1,192876  | -0,073034 | <b>0,559921</b>  | 1827 | 1360 | <b>1593,5</b> |
| SCML1    | 1,347049  | -0,227087 | <b>0,559981</b>  | 1771 | 1952 | <b>1861,5</b> |
| NDC80    | 0,560012  | NaN       | <b>0,560012</b>  | 588  | NaN  | <b>588</b>    |
| GPC4     | 1,082405  | 0,038998  | <b>0,5607015</b> | 1858 | 1565 | <b>1711,5</b> |
| CDCA4    | 1,240103  | -0,118422 | <b>0,5608405</b> | 1836 | 2030 | <b>1933</b>   |
| CUX1     | 1,967318  | -0,845072 | <b>0,561123</b>  | 1121 | 1760 | <b>1440,5</b> |
| KRT18P55 | 0,574711  | 0,547978  | <b>0,5613445</b> | 1600 | 1396 | <b>1498</b>   |
| BCAP31   | 0,891526  | 0,231298  | <b>0,561412</b>  | 1521 | 2081 | <b>1801</b>   |
| C19orf22 | 0,757439  | 0,365855  | <b>0,561647</b>  | 1622 | 2177 | <b>1899,5</b> |
| SLC9A3R2 | 0,517204  | 0,60619   | <b>0,561697</b>  | 1906 | 2140 | <b>2023</b>   |
| DKK3     | 1,459812  | -0,335926 | <b>0,561943</b>  | 1737 | 1877 | <b>1807</b>   |
| TPH2     | 0,000663  | 1,123397  | <b>0,56203</b>   | 1787 | 2658 | <b>2222,5</b> |
| SENP5    | 0,668725  | 0,455615  | <b>0,56217</b>   | 2191 | 2532 | <b>2361,5</b> |
| NBEA     | 0,562185  | NaN       | <b>0,562185</b>  | 1716 | NaN  | <b>1716</b>   |
| KCTD1    | 0,355009  | 0,769444  | <b>0,5622265</b> | 1772 | 2138 | <b>1955</b>   |
| NCK2     | 0,397035  | 0,727606  | <b>0,5623205</b> | 1654 | 2064 | <b>1859</b>   |
| TNFRSF1B | 1,209353  | -0,084429 | <b>0,562462</b>  | 1672 | 1670 | <b>1671</b>   |
| FABP6    | -0,318499 | 1,444233  | <b>0,562867</b>  | 1196 | 1669 | <b>1432,5</b> |

|         |          |           |                  |      |      |               |
|---------|----------|-----------|------------------|------|------|---------------|
| MAPK14  | 0,604788 | 0,520988  | <b>0,562888</b>  | 2265 | 1546 | <b>1905,5</b> |
| SETD7   | 0,01666  | 1,109786  | <b>0,563223</b>  | 1620 | 2552 | <b>2086</b>   |
| SNRPA1  | 0,56326  | NaN       | <b>0,56326</b>   | 805  | NaN  | <b>805</b>    |
| IFNA6   | 0,121468 | 1,005566  | <b>0,563517</b>  | 1758 | 2040 | <b>1899</b>   |
| CD44    | 0,728358 | 0,39917   | <b>0,563764</b>  | 1451 | 1951 | <b>1701</b>   |
| CYP7B1  | 0,127167 | 1,000596  | <b>0,5638815</b> | 1386 | 1469 | <b>1427,5</b> |
| OTC     | 0,237796 | 0,890101  | <b>0,5639485</b> | 2101 | 2975 | <b>2538</b>   |
| CNN3    | 0,737882 | 0,390394  | <b>0,564138</b>  | 1034 | 1884 | <b>1459</b>   |
| THNSL2  | 1,488712 | -0,359957 | <b>0,5643775</b> | 2076 | 2872 | <b>2474</b>   |
| CUL7    | 0,895415 | 0,233597  | <b>0,564506</b>  | 2335 | 2598 | <b>2466,5</b> |
| AFF4    | 0,547275 | 0,581841  | <b>0,564558</b>  | 2168 | 2343 | <b>2255,5</b> |
| NCKIPSD | 0,735773 | 0,393744  | <b>0,5647585</b> | 1443 | 2080 | <b>1761,5</b> |
| BMPR1A  | 0,271783 | 0,857891  | <b>0,564837</b>  | 1728 | 1813 | <b>1770,5</b> |
| MTERFD2 | 0,565154 | NaN       | <b>0,565154</b>  | 1679 | NaN  | <b>1679</b>   |
| ITGA9   | 0,565    | 0,566082  | <b>0,565541</b>  | 1672 | 1740 | <b>1706</b>   |
| ATP6V1A | 1,502712 | -0,370713 | <b>0,5659995</b> | 1731 | 2143 | <b>1937</b>   |
| PDILT   | 0,557258 | 0,575078  | <b>0,566168</b>  | 1942 | 2288 | <b>2115</b>   |
| C1QTNF1 | 0,121584 | 1,010817  | <b>0,5662005</b> | 1544 | 1881 | <b>1712,5</b> |
| SOC57   | -0,03482 | 1,167534  | <b>0,566357</b>  | 1532 | 2665 | <b>2098,5</b> |
| GPR156  | 0,320894 | 0,81194   | <b>0,566417</b>  | 1318 | 2116 | <b>1717</b>   |
| NXPH3   | 0,648509 | 0,484745  | <b>0,566627</b>  | 1511 | 1964 | <b>1737,5</b> |
| SH3BP4  | 0,567372 | NaN       | <b>0,567372</b>  | 1657 | NaN  | <b>1657</b>   |
| ARRDC5  | 0,596765 | 0,538001  | <b>0,567383</b>  | 1656 | 2149 | <b>1902,5</b> |
| HRASLS2 | 0,810223 | 0,324595  | <b>0,567409</b>  | 2126 | 2569 | <b>2347,5</b> |
| NTN1    | 0,615103 | 0,519784  | <b>0,5674435</b> | 1977 | 2281 | <b>2129</b>   |
| FAM40B  | 0,712433 | 0,422546  | <b>0,5674895</b> | 1379 | 1314 | <b>1346,5</b> |
| TCTA    | 1,033743 | 0,101663  | <b>0,567703</b>  | 1759 | 2314 | <b>2036,5</b> |
| AGPS    | 1,014031 | 0,121575  | <b>0,567803</b>  | 1710 | 2347 | <b>2028,5</b> |
| RCC1    | 1,299328 | -0,163352 | <b>0,567988</b>  | 1679 | 2171 | <b>1925</b>   |
| TMEM50B | 0,860046 | 0,275944  | <b>0,567995</b>  | 1804 | 3249 | <b>2526,5</b> |
| PCDHA12 | 0,351286 | 0,784891  | <b>0,5680885</b> | 1393 | 2004 | <b>1698,5</b> |
| ZNF536  | 1,042448 | 0,094458  | <b>0,568453</b>  | 1710 | 1819 | <b>1764,5</b> |
| TMEM38A | 1,013008 | 0,124197  | <b>0,5686025</b> | 2000 | 1850 | <b>1925</b>   |
| PTK7    | 1,383667 | -0,246195 | <b>0,568736</b>  | 1508 | 2287 | <b>1897,5</b> |

|           |           |           |                  |      |      |               |
|-----------|-----------|-----------|------------------|------|------|---------------|
| CADPS     | 0,358057  | 0,779432  | <b>0,5687445</b> | 1603 | 1853 | <b>1728</b>   |
| GSTZ1     | 0,25262   | 0,885352  | <b>0,568986</b>  | 1388 | 2117 | <b>1752,5</b> |
| MIA3      | 0,380293  | 0,757857  | <b>0,569075</b>  | 1564 | 2450 | <b>2007</b>   |
| CPLX1     | 0,582945  | 0,555918  | <b>0,5694315</b> | 1454 | 2278 | <b>1866</b>   |
| IL1RAP    | 1,2359    | -0,096365 | <b>0,5697675</b> | 1606 | 2919 | <b>2262,5</b> |
| C4orf7    | 1,003496  | 0,136221  | <b>0,5698585</b> | 1919 | 2529 | <b>2224</b>   |
| C1orf49   | 0,447942  | 0,69199   | <b>0,569966</b>  | 1519 | 2335 | <b>1927</b>   |
| MRPL21    | 0,570075  | NaN       | <b>0,570075</b>  | 1507 | NaN  | <b>1507</b>   |
| PSKH1     | 1,035672  | 0,104921  | <b>0,5702965</b> | 1446 | 2044 | <b>1745</b>   |
| ZCCHC13   | 0,704194  | 0,436512  | <b>0,570353</b>  | 2279 | 2200 | <b>2239,5</b> |
| PIGY      | 0,570513  | NaN       | <b>0,570513</b>  | 1576 | NaN  | <b>1576</b>   |
| PLEKHA3   | 0,570569  | NaN       | <b>0,570569</b>  | 1871 | NaN  | <b>1871</b>   |
| MBD3      | 0,664072  | 0,477207  | <b>0,5706395</b> | 1833 | 1702 | <b>1767,5</b> |
| UBR4      | 0,291738  | 0,849623  | <b>0,5706805</b> | 1432 | 1848 | <b>1640</b>   |
| SLU7      | 0,506883  | 0,634683  | <b>0,570783</b>  | 1004 | 1408 | <b>1206</b>   |
| HSD3B7    | 0,247243  | 0,894825  | <b>0,571034</b>  | 1491 | 2440 | <b>1965,5</b> |
| PTGFR     | 0,571323  | NaN       | <b>0,571323</b>  | 1468 | NaN  | <b>1468</b>   |
| RALGDS    | 0,457104  | 0,686952  | <b>0,572028</b>  | 1752 | 2140 | <b>1946</b>   |
| P4HA2     | 0,399817  | 0,744573  | <b>0,572195</b>  | 1492 | 1660 | <b>1576</b>   |
| RAMP1     | 0,85565   | 0,289238  | <b>0,572444</b>  | 1938 | 2357 | <b>2147,5</b> |
| KCNJ2     | -0,031108 | 1,176047  | <b>0,5724695</b> | 1283 | 2361 | <b>1822</b>   |
| DPRX      | 0,862445  | 0,282813  | <b>0,572629</b>  | 1467 | 1919 | <b>1693</b>   |
| CNTN4     | 0,57271   | NaN       | <b>0,57271</b>   | 1794 | NaN  | <b>1794</b>   |
| C11orf92  | 1,068249  | 0,0777    | <b>0,5729745</b> | 1547 | 1466 | <b>1506,5</b> |
| C14orf148 | 0,573495  | NaN       | <b>0,573495</b>  | 1867 | NaN  | <b>1867</b>   |
| LGR5      | 0,573511  | NaN       | <b>0,573511</b>  | 1295 | NaN  | <b>1295</b>   |
| SNX5      | 0,556169  | 0,59094   | <b>0,5735545</b> | 1946 | 2085 | <b>2015,5</b> |
| CDC42EP2  | 0,733218  | 0,414027  | <b>0,5736225</b> | 1342 | 1600 | <b>1471</b>   |
| KIAA1429  | 0,573627  | NaN       | <b>0,573627</b>  | 1409 | NaN  | <b>1409</b>   |
| DNM2      | 0,181166  | 0,966483  | <b>0,5738245</b> | 1139 | 1444 | <b>1291,5</b> |
| RILPL2    | 0,573997  | NaN       | <b>0,573997</b>  | 1772 | NaN  | <b>1772</b>   |
| SPECC1L   | 0,671627  | 0,476903  | <b>0,574265</b>  | 1536 | 2563 | <b>2049,5</b> |
| RNF182    | 1,466355  | -0,317637 | <b>0,574359</b>  | 1595 | 2039 | <b>1817</b>   |
| RDH8      | 0,566231  | 0,582998  | <b>0,5746145</b> | 1292 | 2216 | <b>1754</b>   |

|          |           |           |                  |      |      |               |
|----------|-----------|-----------|------------------|------|------|---------------|
| CDC25B   | 0,833457  | 0,316906  | <b>0,5751815</b> | 1743 | 1916 | <b>1829,5</b> |
| ZNF441   | 0,575221  | NaN       | <b>0,575221</b>  | 1501 | NaN  | <b>1501</b>   |
| ABLIM2   | 1,166039  | -0,014538 | <b>0,5757505</b> | 1596 | 2474 | <b>2035</b>   |
| SRA1     | 0,575769  | NaN       | <b>0,575769</b>  | 1797 | NaN  | <b>1797</b>   |
| C20orf7  | 1,448518  | -0,296971 | <b>0,5757735</b> | 1821 | 2034 | <b>1927,5</b> |
| GPRC5C   | 0,575994  | NaN       | <b>0,575994</b>  | 1418 | NaN  | <b>1418</b>   |
| UNC119B  | 0,871385  | 0,280985  | <b>0,576185</b>  | 1869 | 1995 | <b>1932</b>   |
| TNFRSF14 | 0,502605  | 0,650204  | <b>0,5764045</b> | 1236 | 1544 | <b>1390</b>   |
| AKAP14   | -0,263756 | 1,416704  | <b>0,576474</b>  | 1648 | 1999 | <b>1823,5</b> |
| OPHN1    | 0,453305  | 0,699964  | <b>0,5766345</b> | 1648 | 2588 | <b>2118</b>   |
| C2orf88  | 0,57666   | NaN       | <b>0,57666</b>   | 1507 | NaN  | <b>1507</b>   |
| PRMT2    | -0,345329 | 1,498955  | <b>0,576813</b>  | 1177 | 2069 | <b>1623</b>   |
| C11orf16 | 0,590461  | 0,563181  | <b>0,576821</b>  | 1303 | 1856 | <b>1579,5</b> |
| CCDC84   | 0,576902  | NaN       | <b>0,576902</b>  | 1734 | NaN  | <b>1734</b>   |
| NAAA     | 0,405113  | 0,748755  | <b>0,576934</b>  | 1761 | 1995 | <b>1878</b>   |
| SMARCA1  | 0,948796  | 0,205907  | <b>0,5773515</b> | 1500 | 1861 | <b>1680,5</b> |
| ABCA12   | 0,429896  | 0,725069  | <b>0,5774825</b> | 858  | 2142 | <b>1500</b>   |
| IL1RN    | 1,243896  | -0,088448 | <b>0,577724</b>  | 1560 | 2656 | <b>2108</b>   |
| MFNG     | 0,40212   | 0,754014  | <b>0,578067</b>  | 1771 | 2561 | <b>2166</b>   |
| MARK1    | -0,250045 | 1,406355  | <b>0,578155</b>  | 1654 | 1553 | <b>1603,5</b> |
| PPP2CB   | 0,160907  | 0,995607  | <b>0,578257</b>  | 1662 | 2169 | <b>1915,5</b> |
| CAPNS1   | 0,072965  | 1,083614  | <b>0,5782895</b> | 1694 | 2965 | <b>2329,5</b> |
| PRRT2    | -0,105401 | 1,262202  | <b>0,5784005</b> | 2075 | 2202 | <b>2138,5</b> |
| IKBKG    | 0,89159   | 0,265218  | <b>0,578404</b>  | 2083 | 2453 | <b>2268</b>   |
| MT1H     | 1,657317  | -0,499478 | <b>0,5789195</b> | 1888 | 2452 | <b>2170</b>   |
| DNAJB8   | 0,452354  | 0,705645  | <b>0,5789995</b> | 1430 | 2082 | <b>1756</b>   |
| RUFY1    | -0,132256 | 1,290471  | <b>0,5791075</b> | 1433 | 2368 | <b>1900,5</b> |
| EPS15L1  | 0,956808  | 0,201606  | <b>0,579207</b>  | 1706 | 1802 | <b>1754</b>   |
| CASQ1    | 0,480453  | 0,678341  | <b>0,579397</b>  | 1959 | 2136 | <b>2047,5</b> |
| STAG1    | 1,556078  | -0,397164 | <b>0,579457</b>  | 1558 | 1974 | <b>1766</b>   |
| NUAK1    | 0,491072  | 0,667921  | <b>0,5794965</b> | 1552 | 2069 | <b>1810,5</b> |
| P4HA1    | 0,330611  | 0,829575  | <b>0,580093</b>  | 1452 | 1969 | <b>1710,5</b> |
| FAM123C  | 0,346707  | 0,813709  | <b>0,580208</b>  | 1700 | 1957 | <b>1828,5</b> |
| KIF12    | 0,134243  | 1,026467  | <b>0,580355</b>  | 1445 | 2389 | <b>1917</b>   |

|          |           |           |                  |      |      |               |
|----------|-----------|-----------|------------------|------|------|---------------|
| KIAA1267 | 0,580811  | NaN       | <b>0,580811</b>  | 1419 | NaN  | <b>1419</b>   |
| NUP62CL  | 1,072496  | 0,089276  | <b>0,580886</b>  | 1644 | 2675 | <b>2159,5</b> |
| IRGQ     | 0,580951  | NaN       | <b>0,580951</b>  | 1490 | NaN  | <b>1490</b>   |
| ANKRD13D | 0,861535  | 0,300522  | <b>0,5810285</b> | 1724 | 1884 | <b>1804</b>   |
| GSX2     | 0,213611  | 0,948963  | <b>0,581287</b>  | 1332 | 1792 | <b>1562</b>   |
| SPOCK3   | 0,892684  | 0,269909  | <b>0,5812965</b> | 1507 | 1666 | <b>1586,5</b> |
| MYLIP    | 0,429494  | 0,733222  | <b>0,581358</b>  | 1692 | 2357 | <b>2024,5</b> |
| EPCAM    | 1,483401  | -0,320357 | <b>0,581522</b>  | 1990 | 2188 | <b>2089</b>   |
| DCLRE1B  | -0,555754 | 1,71892   | <b>0,581583</b>  | 1434 | 2260 | <b>1847</b>   |
| GSDMA    | 0,581632  | NaN       | <b>0,581632</b>  | 1412 | NaN  | <b>1412</b>   |
| STOX1    | 0,176678  | 0,986995  | <b>0,5818365</b> | 1395 | 1651 | <b>1523</b>   |
| GPD1     | 0,875031  | 0,288816  | <b>0,5819235</b> | 1323 | 2446 | <b>1884,5</b> |
| 07-sept  | 1,047205  | 0,116738  | <b>0,5819715</b> | 1878 | 2035 | <b>1956,5</b> |
| AGFG1    | 1,449548  | -0,285568 | <b>0,58199</b>   | 1594 | 2278 | <b>1936</b>   |
| RGS22    | 0,522883  | 0,642205  | <b>0,582544</b>  | 1730 | 2177 | <b>1953,5</b> |
| COL17A1  | 0,294238  | 0,870895  | <b>0,5825665</b> | 1582 | 1987 | <b>1784,5</b> |
| C15orf42 | 0,924666  | 0,240625  | <b>0,5826455</b> | 826  | 1451 | <b>1138,5</b> |
| CABP5    | 1,110809  | 0,054515  | <b>0,582662</b>  | 2055 | 2238 | <b>2146,5</b> |
| GPATCH2  | 0,664667  | 0,50084   | <b>0,5827535</b> | 1541 | 2397 | <b>1969</b>   |
| MARCKS   | 0,719678  | 0,446117  | <b>0,5828975</b> | 1594 | 1447 | <b>1520,5</b> |
| NLRP14   | -0,138646 | 1,304451  | <b>0,5829025</b> | 1437 | 2288 | <b>1862,5</b> |
| C16orf53 | 0,583053  | NaN       | <b>0,583053</b>  | 1611 | NaN  | <b>1611</b>   |
| UBE2C    | 0,581075  | 0,585116  | <b>0,5830955</b> | 2235 | 3077 | <b>2656</b>   |
| PNPLA4   | 0,445121  | 0,721277  | <b>0,583199</b>  | 1740 | 2423 | <b>2081,5</b> |
| NDRG1    | 1,186717  | -0,020178 | <b>0,5832695</b> | 2011 | 3019 | <b>2515</b>   |
| CAMKV    | 0,639972  | 0,527164  | <b>0,583568</b>  | 1843 | 2275 | <b>2059</b>   |
| B3GNT1   | 0,713488  | 0,454765  | <b>0,5841265</b> | 1568 | 2274 | <b>1921</b>   |
| KIAA1407 | 0,0929    | 1,075556  | <b>0,584228</b>  | 1327 | 2774 | <b>2050,5</b> |
| GDF3     | 0,495253  | 0,673247  | <b>0,58425</b>   | 1660 | 1738 | <b>1699</b>   |
| FTSJ1    | 0,864577  | 0,304014  | <b>0,5842955</b> | 1333 | 2190 | <b>1761,5</b> |
| CLIC5    | 0,91818   | 0,250501  | <b>0,5843405</b> | 1712 | 1986 | <b>1849</b>   |
| VN1R4    | 0,631394  | 0,537295  | <b>0,5843445</b> | 2154 | 2043 | <b>2098,5</b> |
| RNF10    | 0,719475  | 0,449461  | <b>0,584468</b>  | 1745 | 2056 | <b>1900,5</b> |
| C17orf37 | 0,054784  | 1,114189  | <b>0,5844865</b> | 1564 | 1526 | <b>1545</b>   |



|           |           |           |                  |      |      |               |
|-----------|-----------|-----------|------------------|------|------|---------------|
| FAM13C    | 1,069206  | 0,099942  | <b>0,584574</b>  | 1544 | 1347 | <b>1445,5</b> |
| C9orf25   | 0,603143  | 0,566099  | <b>0,584621</b>  | 1771 | 1900 | <b>1835,5</b> |
| DAZAP1    | 1,122858  | 0,046398  | <b>0,584628</b>  | 1661 | 2112 | <b>1886,5</b> |
| RSPH4A    | 0,584739  | NaN       | <b>0,584739</b>  | 1668 | NaN  | <b>1668</b>   |
| LGALS8    | 0,808738  | 0,360813  | <b>0,5847755</b> | 449  | 1051 | <b>750</b>    |
| GJB3      | 1,512707  | -0,343079 | <b>0,584814</b>  | 873  | 2248 | <b>1560,5</b> |
| FARS2     | 0,842825  | 0,327431  | <b>0,585128</b>  | 1589 | 2206 | <b>1897,5</b> |
| ZNF783    | 0,650007  | 0,520987  | <b>0,585497</b>  | 1045 | 1428 | <b>1236,5</b> |
| C6orf57   | 0,575584  | 0,595475  | <b>0,5855295</b> | 1889 | 2050 | <b>1969,5</b> |
| C20orf132 | -0,044789 | 1,216101  | <b>0,585656</b>  | 1431 | 1733 | <b>1582</b>   |
| SLC32A1   | 0,585815  | NaN       | <b>0,585815</b>  | 1545 | NaN  | <b>1545</b>   |
| MFHAS1    | 0,025671  | 1,14718   | <b>0,5864255</b> | 1874 | 2436 | <b>2155</b>   |
| FAM54A    | 0,523919  | 0,649629  | <b>0,586774</b>  | 1339 | 2293 | <b>1816</b>   |
| HELT      | 0,93776   | 0,236388  | <b>0,587074</b>  | 1303 | 1696 | <b>1499,5</b> |
| ITGB7     | 1,497706  | -0,323553 | <b>0,5870765</b> | 1958 | 2324 | <b>2141</b>   |
| PAQR7     | 1,346999  | -0,171993 | <b>0,587503</b>  | 1641 | 1652 | <b>1646,5</b> |
| OR2C1     | 0,618801  | 0,556237  | <b>0,587519</b>  | 1277 | 2592 | <b>1934,5</b> |
| CYS1      | 0,932254  | 0,242883  | <b>0,5875685</b> | 1486 | 1271 | <b>1378,5</b> |
| GTF3C1    | 0,873687  | 0,301788  | <b>0,5877375</b> | 1997 | 2094 | <b>2045,5</b> |
| TAS1R3    | 0,662539  | 0,513364  | <b>0,5879515</b> | 1618 | 1718 | <b>1668</b>   |
| HMHA1     | 0,969132  | 0,206865  | <b>0,5879985</b> | 1562 | 2098 | <b>1830</b>   |
| ETS2      | 0,722101  | 0,454779  | <b>0,58844</b>   | 2145 | 1778 | <b>1961,5</b> |
| ESRP2     | 1,312382  | -0,133286 | <b>0,589548</b>  | 1300 | 2028 | <b>1664</b>   |
| CALN1     | 0,981137  | 0,198031  | <b>0,589584</b>  | 1718 | 1259 | <b>1488,5</b> |
| TMEM55A   | 1,432648  | -0,253406 | <b>0,589621</b>  | 1525 | 2205 | <b>1865</b>   |
| DNAJC22   | 0,377232  | 0,802011  | <b>0,5896215</b> | 1809 | 1671 | <b>1740</b>   |
| SCAF1     | 0,680204  | 0,499336  | <b>0,58977</b>   | 1454 | 2091 | <b>1772,5</b> |
| RNF103    | 0,510994  | 0,668593  | <b>0,5897935</b> | 1580 | 2767 | <b>2173,5</b> |
| ZMYND15   | 0,589937  | NaN       | <b>0,589937</b>  | 1348 | NaN  | <b>1348</b>   |
| C1QTNF2   | 0,6801    | 0,500018  | <b>0,590059</b>  | 1552 | 1551 | <b>1551,5</b> |
| NRN1L     | 0,590275  | NaN       | <b>0,590275</b>  | 1714 | NaN  | <b>1714</b>   |
| PITPNM3   | 0,378938  | 0,801629  | <b>0,5902835</b> | 1326 | 1749 | <b>1537,5</b> |
| HEBP1     | 0,276285  | 0,9046    | <b>0,5904425</b> | 1832 | 2958 | <b>2395</b>   |
| DDX39A    | 0,709239  | 0,471703  | <b>0,590471</b>  | 1069 | 1754 | <b>1411,5</b> |

|          |           |           |                  |      |      |               |
|----------|-----------|-----------|------------------|------|------|---------------|
| LRRTM1   | 0,590518  | NaN       | <b>0,590518</b>  | 1849 | NaN  | <b>1849</b>   |
| CERS4    | 0,523457  | 0,657716  | <b>0,5905865</b> | 1375 | 1982 | <b>1678,5</b> |
| BSPH1    | 0,419664  | 0,761676  | <b>0,59067</b>   | 1675 | 2561 | <b>2118</b>   |
| PDGFB    | 1,328964  | -0,146984 | <b>0,59099</b>   | 1965 | 2278 | <b>2121,5</b> |
| ZNF331   | 0,617794  | 0,564379  | <b>0,5910865</b> | 1834 | 2091 | <b>1962,5</b> |
| TAS2R3   | 1,29881   | -0,11617  | <b>0,59132</b>   | 1333 | 1838 | <b>1585,5</b> |
| MAL2     | 0,276041  | 0,906642  | <b>0,5913415</b> | 1334 | 2372 | <b>1853</b>   |
| CSNK1G2  | 0,835163  | 0,347744  | <b>0,5914535</b> | 2190 | 1883 | <b>2036,5</b> |
| C1R      | 2,393649  | -1,21053  | <b>0,5915595</b> | 1087 | 2105 | <b>1596</b>   |
| CCL22    | 0,871084  | 0,312387  | <b>0,5917355</b> | 1855 | 2521 | <b>2188</b>   |
| CXCL14   | 0,591862  | NaN       | <b>0,591862</b>  | 1421 | NaN  | <b>1421</b>   |
| TMPRSS12 | 0,677388  | 0,506623  | <b>0,5920055</b> | 1518 | 2389 | <b>1953,5</b> |
| CEP95    | 1,517187  | -0,332748 | <b>0,5922195</b> | 2349 | 3242 | <b>2795,5</b> |
| PRSS1    | 1,32883   | -0,144382 | <b>0,592224</b>  | 1259 | 1392 | <b>1325,5</b> |
| TOMM70A  | 1,08956   | 0,095137  | <b>0,5923485</b> | 1171 | 2190 | <b>1680,5</b> |
| C6orf170 | 1,204194  | -0,019057 | <b>0,5925685</b> | 1487 | 1928 | <b>1707,5</b> |
| ZBTB33   | 1,122283  | 0,0635    | <b>0,5928915</b> | 1716 | 2019 | <b>1867,5</b> |
| BLMH     | 0,014643  | 1,171543  | <b>0,593093</b>  | 1580 | 2050 | <b>1815</b>   |
| SLC35B1  | 0,698386  | 0,487902  | <b>0,593144</b>  | 1359 | 1389 | <b>1374</b>   |
| TECR     | -0,622027 | 1,808958  | <b>0,5934655</b> | 1207 | 1270 | <b>1238,5</b> |
| CRNN     | 0,594482  | 0,592679  | <b>0,5935805</b> | 1689 | 2279 | <b>1984</b>   |
| KIF6     | 0,593584  | NaN       | <b>0,593584</b>  | 1883 | NaN  | <b>1883</b>   |
| KRT77    | 0,593788  | NaN       | <b>0,593788</b>  | 1835 | NaN  | <b>1835</b>   |
| SLC37A3  | 0,90486   | 0,282916  | <b>0,593888</b>  | 1604 | 2364 | <b>1984</b>   |
| SLC4A9   | 0,100025  | 1,088347  | <b>0,594186</b>  | 2002 | 1799 | <b>1900,5</b> |
| C15orf41 | 1,243815  | -0,05519  | <b>0,5943125</b> | 1522 | 2012 | <b>1767</b>   |
| DMTF1    | NaN       | 0,59443   | <b>0,59443</b>   | NaN  | 2071 | <b>2071</b>   |
| HECW1    | 1,170372  | 0,018992  | <b>0,594682</b>  | 1860 | 2653 | <b>2256,5</b> |
| WBP2NL   | 0,594767  | NaN       | <b>0,594767</b>  | 1677 | NaN  | <b>1677</b>   |
| KCTD5    | 0,336142  | 0,853595  | <b>0,5948685</b> | 1551 | 2484 | <b>2017,5</b> |
| CEP104   | 0,727931  | 0,462171  | <b>0,595051</b>  | 1422 | 2261 | <b>1841,5</b> |
| PIK3R6   | 0,98109   | 0,209152  | <b>0,595121</b>  | 1416 | 2025 | <b>1720,5</b> |
| EIF3K    | 0,810404  | 0,380393  | <b>0,5953985</b> | 1363 | 1746 | <b>1554,5</b> |
| TAGLN3   | 0,633438  | 0,557632  | <b>0,595535</b>  | 2045 | 2992 | <b>2518,5</b> |

|          |           |           |                  |      |      |               |
|----------|-----------|-----------|------------------|------|------|---------------|
| KCTD6    | 1,036147  | 0,155607  | <b>0,595877</b>  | 1804 | 2400 | <b>2102</b>   |
| SLC46A1  | 0,612378  | 0,580166  | <b>0,596272</b>  | 1497 | 1435 | <b>1466</b>   |
| SLC17A6  | 0,18291   | 1,009809  | <b>0,5963595</b> | 1493 | 1940 | <b>1716,5</b> |
| GAS2L1   | 0,59677   | NaN       | <b>0,59677</b>   | 1633 | NaN  | <b>1633</b>   |
| FAM190A  | 0,596774  | NaN       | <b>0,596774</b>  | 576  | NaN  | <b>576</b>    |
| TMEM106A | 0,597021  | NaN       | <b>0,597021</b>  | 1677 | NaN  | <b>1677</b>   |
| ANKRD2   | 1,012293  | 0,182073  | <b>0,597183</b>  | 2221 | 1939 | <b>2080</b>   |
| LETM2    | 0,942811  | 0,251745  | <b>0,597278</b>  | 1296 | 1811 | <b>1553,5</b> |
| SDAD1    | 0,597624  | NaN       | <b>0,597624</b>  | 1858 | NaN  | <b>1858</b>   |
| MSMO1    | 0,038007  | 1,157336  | <b>0,5976715</b> | 1914 | 3078 | <b>2496</b>   |
| CA8      | 0,352742  | 0,843141  | <b>0,5979415</b> | 2201 | 1960 | <b>2080,5</b> |
| ARHGAP1  | -0,598081 | 1,794179  | <b>0,598049</b>  | 1805 | 2154 | <b>1979,5</b> |
| UNC50    | 1,118183  | 0,077943  | <b>0,598063</b>  | 1512 | 1620 | <b>1566</b>   |
| OR5T3    | 0,598131  | 0,598821  | <b>0,598476</b>  | 1520 | 2286 | <b>1903</b>   |
| EVC2     | 0,09699   | 1,100145  | <b>0,5985675</b> | 1859 | 1696 | <b>1777,5</b> |
| OXNAD1   | -0,159883 | 1,357479  | <b>0,598798</b>  | 1640 | 2708 | <b>2174</b>   |
| LRRFIP1  | 0,625557  | 0,572247  | <b>0,598902</b>  | 1703 | 1805 | <b>1754</b>   |
| ZNF281   | 0,637915  | 0,560261  | <b>0,599088</b>  | 1704 | 2168 | <b>1936</b>   |
| IL36A    | 0,715411  | 0,482832  | <b>0,5991215</b> | 1848 | 2337 | <b>2092,5</b> |
| CAPN11   | 0,113881  | 1,084939  | <b>0,59941</b>   | 2017 | 2217 | <b>2117</b>   |
| PAFAH1B2 | 0,209265  | 0,990292  | <b>0,5997785</b> | 2200 | 3084 | <b>2642</b>   |
| NEK8     | 0,092182  | 1,107395  | <b>0,5997885</b> | 2015 | 1945 | <b>1980</b>   |
| LRRFIP2  | 1,06723   | 0,132543  | <b>0,5998865</b> | 1411 | 1597 | <b>1504</b>   |
| EXOSC6   | 0,951504  | 0,248468  | <b>0,599986</b>  | 2093 | 2027 | <b>2060</b>   |
| HS3ST2   | 0,601173  | 0,599013  | <b>0,600093</b>  | 1004 | 1616 | <b>1310</b>   |
| IGDCC3   | 0,853663  | 0,346832  | <b>0,6002475</b> | 1305 | 2141 | <b>1723</b>   |
| FAM166A  | 0,600579  | NaN       | <b>0,600579</b>  | 1186 | NaN  | <b>1186</b>   |
| CCDC164  | 0,60096   | NaN       | <b>0,60096</b>   | 1750 | NaN  | <b>1750</b>   |
| GPR15    | 0,600993  | NaN       | <b>0,600993</b>  | 1441 | NaN  | <b>1441</b>   |
| ZDHHC24  | 0,601229  | NaN       | <b>0,601229</b>  | 1333 | NaN  | <b>1333</b>   |
| CREBZF   | 1,409022  | -0,206142 | <b>0,60144</b>   | 1848 | 2432 | <b>2140</b>   |
| ANXA13   | 1,04719   | 0,156005  | <b>0,6015975</b> | 1846 | 1939 | <b>1892,5</b> |
| ZFYVE19  | 1,074239  | 0,130095  | <b>0,602167</b>  | 1010 | 1881 | <b>1445,5</b> |
| PHACTR3  | 0,822205  | 0,383203  | <b>0,602704</b>  | 1467 | 1984 | <b>1725,5</b> |

|          |           |           |                  |      |      |               |
|----------|-----------|-----------|------------------|------|------|---------------|
| C2orf3   | 0,946302  | 0,259269  | <b>0,6027855</b> | 1882 | 2206 | <b>2044</b>   |
| CWF19L1  | 1,045862  | 0,15995   | <b>0,602906</b>  | 1675 | 2579 | <b>2127</b>   |
| FAM105B  | 0,603303  | NaN       | <b>0,603303</b>  | 1746 | NaN  | <b>1746</b>   |
| GNGT1    | 0,603662  | NaN       | <b>0,603662</b>  | 1555 | NaN  | <b>1555</b>   |
| ZNF555   | 1,199439  | 0,008094  | <b>0,6037665</b> | 1853 | 1880 | <b>1866,5</b> |
| FAM116A  | 2,386697  | -1,179161 | <b>0,603768</b>  | 1521 | 1835 | <b>1678</b>   |
| KLF7     | 1,242957  | -0,033947 | <b>0,604505</b>  | 1228 | 2039 | <b>1633,5</b> |
| DUOXA2   | 0,605008  | NaN       | <b>0,605008</b>  | 1296 | NaN  | <b>1296</b>   |
| CRAT     | 0,606941  | 0,603194  | <b>0,6050675</b> | 1521 | 2213 | <b>1867</b>   |
| FEV      | -0,403328 | 1,613876  | <b>0,605274</b>  | 1627 | 2054 | <b>1840,5</b> |
| MX1      | NaN       | 0,605275  | <b>0,605275</b>  | NaN  | 2624 | <b>2624</b>   |
| PEG3     | 0,98337   | 0,227938  | <b>0,605654</b>  | 1603 | 2067 | <b>1835</b>   |
| TDRKH    | 1,188244  | 0,023252  | <b>0,605748</b>  | 1683 | 1924 | <b>1803,5</b> |
| RRAGB    | 0,385873  | 0,826436  | <b>0,6061545</b> | 1932 | 2276 | <b>2104</b>   |
| OTUD5    | 0,036797  | 1,175706  | <b>0,6062515</b> | 1007 | 2342 | <b>1674,5</b> |
| BCR      | -0,115644 | 1,329026  | <b>0,606691</b>  | 1922 | 1776 | <b>1849</b>   |
| HOXC11   | 0,388376  | 0,825361  | <b>0,6068685</b> | 1738 | 2567 | <b>2152,5</b> |
| SERPINF2 | 0,607072  | NaN       | <b>0,607072</b>  | 1431 | NaN  | <b>1431</b>   |
| AGL      | 0,588634  | 0,625676  | <b>0,607155</b>  | 1799 | 2440 | <b>2119,5</b> |
| C12orf68 | 1,00697   | 0,20806   | <b>0,607515</b>  | 1619 | 2322 | <b>1970,5</b> |
| KLC1     | -0,354052 | 1,56925   | <b>0,607599</b>  | 1224 | 2113 | <b>1668,5</b> |
| ACPT     | 1,235137  | -0,019392 | <b>0,6078725</b> | 1594 | 2253 | <b>1923,5</b> |
| AKAP11   | 0,830483  | 0,385327  | <b>0,607905</b>  | 1701 | 2058 | <b>1879,5</b> |
| NKAIN2   | 0,134702  | 1,081343  | <b>0,6080225</b> | 1457 | 1792 | <b>1624,5</b> |
| LEPR     | 0,608075  | NaN       | <b>0,608075</b>  | 1851 | NaN  | <b>1851</b>   |
| SLC1A1   | 0,046364  | 1,17016   | <b>0,608262</b>  | 1595 | 1604 | <b>1599,5</b> |
| OAS3     | 0,004511  | 1,212259  | <b>0,608385</b>  | 1818 | 2093 | <b>1955,5</b> |
| C17orf85 | 0,608485  | NaN       | <b>0,608485</b>  | 1862 | NaN  | <b>1862</b>   |
| MRPS14   | 0,587893  | 0,629257  | <b>0,608575</b>  | 1436 | 2566 | <b>2001</b>   |
| NT5C1A   | 1,014656  | 0,202704  | <b>0,60868</b>   | 1609 | 2042 | <b>1825,5</b> |
| OIT3     | 0,654372  | 0,56434   | <b>0,609356</b>  | 1949 | 2829 | <b>2389</b>   |
| BEX5     | 0,609416  | NaN       | <b>0,609416</b>  | 1792 | NaN  | <b>1792</b>   |
| PECAM1   | 0,741258  | 0,478107  | <b>0,6096825</b> | 1706 | 1828 | <b>1767</b>   |
| SND1     | 1,107695  | 0,111762  | <b>0,6097285</b> | 1332 | 2133 | <b>1732,5</b> |

|          |           |           |                  |      |      |               |
|----------|-----------|-----------|------------------|------|------|---------------|
| BMPR1B   | 0,553052  | 0,66741   | <b>0,610231</b>  | 1638 | 2019 | <b>1828,5</b> |
| OR4D10   | 0,610305  | NaN       | <b>0,610305</b>  | 1808 | NaN  | <b>1808</b>   |
| KTN1     | 0,88033   | 0,340416  | <b>0,610373</b>  | 1860 | 2417 | <b>2138,5</b> |
| COLEC12  | 0,705726  | 0,515396  | <b>0,610561</b>  | 1913 | 2680 | <b>2296,5</b> |
| RNASE3   | 0,83553   | 0,385624  | <b>0,610577</b>  | 1664 | 2454 | <b>2059</b>   |
| C12orf23 | 0,610972  | NaN       | <b>0,610972</b>  | 1965 | NaN  | <b>1965</b>   |
| NR4A2    | -0,377808 | 1,600177  | <b>0,6111845</b> | 1208 | 1652 | <b>1430</b>   |
| IL27RA   | 0,285003  | 0,937464  | <b>0,6112335</b> | 1298 | 2179 | <b>1738,5</b> |
| ZNF720   | 0,943751  | 0,278765  | <b>0,611258</b>  | 1558 | 2117 | <b>1837,5</b> |
| MYO3A    | 0,165139  | 1,057891  | <b>0,611515</b>  | 1868 | 1781 | <b>1824,5</b> |
| POLR2A   | 0,527701  | 0,695589  | <b>0,611645</b>  | 1694 | 1923 | <b>1808,5</b> |
| P2RY8    | 0,611836  | NaN       | <b>0,611836</b>  | 1588 | NaN  | <b>1588</b>   |
| RAB23    | 0,651741  | 0,572051  | <b>0,611896</b>  | 2139 | 2747 | <b>2443</b>   |
| SLC10A2  | 0,616916  | 0,606953  | <b>0,6119345</b> | 1907 | 2170 | <b>2038,5</b> |
| EPS15    | 0,612332  | NaN       | <b>0,612332</b>  | 1111 | NaN  | <b>1111</b>   |
| PDS5B    | 1,842044  | -0,617323 | <b>0,6123605</b> | 1323 | 1665 | <b>1494</b>   |
| OR2G2    | 0,331051  | 0,894489  | <b>0,61277</b>   | 1610 | 1831 | <b>1720,5</b> |
| SPATA22  | 0,612888  | NaN       | <b>0,612888</b>  | 1559 | NaN  | <b>1559</b>   |
| RFC4     | 0,610485  | 0,615394  | <b>0,6129395</b> | 1948 | 2091 | <b>2019,5</b> |
| CAT      | -0,125462 | 1,351438  | <b>0,612988</b>  | 1668 | 1727 | <b>1697,5</b> |
| ROR2     | 0,340958  | 0,885424  | <b>0,613191</b>  | 1814 | 1891 | <b>1852,5</b> |
| SERTAD3  | 0,968282  | 0,25814   | <b>0,613211</b>  | 1800 | 1640 | <b>1720</b>   |
| PPP1R3B  | 0,50804   | 0,718512  | <b>0,613276</b>  | 1714 | 1835 | <b>1774,5</b> |
| FAM184A  | 0,72047   | 0,506246  | <b>0,613358</b>  | 1750 | 2043 | <b>1896,5</b> |
| OSTM1    | 1,051153  | 0,175976  | <b>0,6135645</b> | 1555 | 1862 | <b>1708,5</b> |
| ADNP     | 0,908632  | 0,31903   | <b>0,613831</b>  | 1189 | 1843 | <b>1516</b>   |
| ZNF259   | 0,695745  | 0,532065  | <b>0,613905</b>  | 1237 | 1724 | <b>1480,5</b> |
| RBBP7    | 1,165553  | 0,062529  | <b>0,614041</b>  | 2030 | 1887 | <b>1958,5</b> |
| TXNRD1   | 0,067823  | 1,160619  | <b>0,614221</b>  | 1464 | 1790 | <b>1627</b>   |
| NCOA4    | 0,030846  | 1,197863  | <b>0,6143545</b> | 1535 | 2364 | <b>1949,5</b> |
| KCNU1    | 0,605305  | 0,623545  | <b>0,614425</b>  | 2054 | 2519 | <b>2286,5</b> |
| SMURF1   | 0,745134  | 0,484343  | <b>0,6147385</b> | 1603 | 2160 | <b>1881,5</b> |
| STAT6    | NaN       | 0,614823  | <b>0,614823</b>  | NaN  | 2691 | <b>2691</b>   |
| TFEB     | 0,154309  | 1,075611  | <b>0,61496</b>   | 1849 | 2234 | <b>2041,5</b> |

|          |           |           |                  |      |      |               |
|----------|-----------|-----------|------------------|------|------|---------------|
| FHL5     | 0,96528   | 0,264982  | <b>0,615131</b>  | 1491 | 1949 | <b>1720</b>   |
| NDUFB11  | 0,615154  | NaN       | <b>0,615154</b>  | 1437 | NaN  | <b>1437</b>   |
| SEZ6L2   | 0,875894  | 0,354663  | <b>0,6152785</b> | 1729 | 2303 | <b>2016</b>   |
| PYROXD2  | 2,130616  | -0,899222 | <b>0,615697</b>  | 1281 | 1780 | <b>1530,5</b> |
| PSMD6    | 0,855661  | 0,376872  | <b>0,6162665</b> | 780  | 629  | <b>704,5</b>  |
| GOT1L1   | 0,599453  | 0,633809  | <b>0,616631</b>  | 2253 | 1927 | <b>2090</b>   |
| PACRGL   | 0,300218  | 0,933045  | <b>0,6166315</b> | 1592 | 1919 | <b>1755,5</b> |
| CKAP2    | -0,05806  | 1,293281  | <b>0,6176105</b> | 1172 | 1430 | <b>1301</b>   |
| FAM171B  | 0,029397  | 1,20669   | <b>0,6180435</b> | 1992 | 2366 | <b>2179</b>   |
| ITGAV    | 1,947315  | -0,710865 | <b>0,618225</b>  | 1371 | 1558 | <b>1464,5</b> |
| C10orf99 | 0,618599  | NaN       | <b>0,618599</b>  | 1639 | NaN  | <b>1639</b>   |
| PTDSS2   | 0,068195  | 1,169258  | <b>0,6187265</b> | 1570 | 1992 | <b>1781</b>   |
| ZNF835   | 0,338927  | 0,898569  | <b>0,618748</b>  | 1688 | 1978 | <b>1833</b>   |
| CYLD     | 0,672829  | 0,565046  | <b>0,6189375</b> | 1503 | 2610 | <b>2056,5</b> |
| SETDB1   | 0,412685  | 0,825248  | <b>0,6189665</b> | 1394 | 1406 | <b>1400</b>   |
| SLC27A4  | 0,301323  | 0,936782  | <b>0,6190525</b> | 1727 | 2185 | <b>1956</b>   |
| unknown  | 1,315485  | -0,077306 | <b>0,6190895</b> | 1400 | 2904 | <b>2152</b>   |
| PXN      | 0,86043   | 0,37804   | <b>0,619235</b>  | 1140 | 1992 | <b>1566</b>   |
| THOC5    | 0,132576  | 1,105944  | <b>0,61926</b>   | 1220 | 1885 | <b>1552,5</b> |
| FAM162A  | 1,168747  | 0,069988  | <b>0,6193675</b> | 1959 | 3106 | <b>2532,5</b> |
| CIAO1    | 0,671431  | 0,568177  | <b>0,619804</b>  | 1805 | 1827 | <b>1816</b>   |
| SERTM1   | 0,523647  | 0,716006  | <b>0,6198265</b> | 1660 | 1964 | <b>1812</b>   |
| ZNF517   | 0,89456   | 0,345904  | <b>0,620232</b>  | 1487 | 1363 | <b>1425</b>   |
| SNIP1    | 0,620735  | NaN       | <b>0,620735</b>  | 1382 | NaN  | <b>1382</b>   |
| HNF1B    | 0,173053  | 1,068677  | <b>0,620865</b>  | 1228 | 2018 | <b>1623</b>   |
| JAK2     | 0,645612  | 0,596336  | <b>0,620974</b>  | 2107 | 2101 | <b>2104</b>   |
| PHKA1    | 0,858916  | 0,383057  | <b>0,6209865</b> | 1925 | 2072 | <b>1998,5</b> |
| FGF6     | -0,521311 | 1,764219  | <b>0,621454</b>  | 1619 | 2182 | <b>1900,5</b> |
| VASN     | 0,62163   | NaN       | <b>0,62163</b>   | 1554 | NaN  | <b>1554</b>   |
| PSEN1    | 1,088784  | 0,155168  | <b>0,621976</b>  | 1620 | 2545 | <b>2082,5</b> |
| CRIP3    | 0,622088  | NaN       | <b>0,622088</b>  | 1525 | NaN  | <b>1525</b>   |
| HDC      | NaN       | 0,622094  | <b>0,622094</b>  | NaN  | 2683 | <b>2683</b>   |
| HERPUD2  | 0,622115  | NaN       | <b>0,622115</b>  | 1525 | NaN  | <b>1525</b>   |
| COG4     | 1,006138  | 0,238606  | <b>0,622372</b>  | 1020 | 2509 | <b>1764,5</b> |

|          |           |           |                  |      |      |               |
|----------|-----------|-----------|------------------|------|------|---------------|
| RRM1     | NaN       | 0,622739  | <b>0,622739</b>  | NaN  | 2500 | <b>2500</b>   |
| WDR5     | 0,675661  | 0,570173  | <b>0,622917</b>  | 1907 | 2528 | <b>2217,5</b> |
| SALL4    | 0,283828  | 0,962053  | <b>0,6229405</b> | 1489 | 2309 | <b>1899</b>   |
| AR       | NaN       | 0,622977  | <b>0,622977</b>  | NaN  | 2553 | <b>2553</b>   |
| KCTD15   | 1,20237   | 0,043734  | <b>0,623052</b>  | 1847 | 3048 | <b>2447,5</b> |
| DDAH1    | 0,724268  | 0,522276  | <b>0,623272</b>  | 1439 | 2289 | <b>1864</b>   |
| SPCS3    | 1,272698  | -0,026147 | <b>0,6232755</b> | 2031 | 2151 | <b>2091</b>   |
| R3HDM1   | 0,623604  | NaN       | <b>0,623604</b>  | 1535 | NaN  | <b>1535</b>   |
| MAP7     | 0,546449  | 0,701776  | <b>0,6241125</b> | 1600 | 2348 | <b>1974</b>   |
| SLC6A15  | 1,021129  | 0,227169  | <b>0,624149</b>  | 1516 | 2271 | <b>1893,5</b> |
| ARFIP2   | 1,155193  | 0,093573  | <b>0,624383</b>  | 1590 | 2394 | <b>1992</b>   |
| NINJ1    | 0,647513  | 0,601707  | <b>0,62461</b>   | 966  | 1742 | <b>1354</b>   |
| PLD4     | 0,483599  | 0,765934  | <b>0,6247665</b> | 1718 | 3076 | <b>2397</b>   |
| COQ5     | 0,307236  | 0,942307  | <b>0,6247715</b> | 1792 | 2059 | <b>1925,5</b> |
| ARMCX2   | 0,300456  | 0,949392  | <b>0,624924</b>  | 1406 | 2135 | <b>1770,5</b> |
| CCDC18   | 0,698737  | 0,551127  | <b>0,624932</b>  | 1780 | 2676 | <b>2228</b>   |
| TMEM202  | 0,994574  | 0,255684  | <b>0,625129</b>  | 1943 | 1998 | <b>1970,5</b> |
| KIAA1797 | 0,587792  | 0,662612  | <b>0,625202</b>  | 1651 | 2102 | <b>1876,5</b> |
| PIK3CA   | 0,706768  | 0,544011  | <b>0,6253895</b> | 994  | 1345 | <b>1169,5</b> |
| NFKBID   | 0,625807  | NaN       | <b>0,625807</b>  | 1496 | NaN  | <b>1496</b>   |
| COQ9     | -0,035923 | 1,288236  | <b>0,6261565</b> | 1749 | 1985 | <b>1867</b>   |
| HOXD3    | 1,536942  | -0,284595 | <b>0,6261735</b> | 1491 | 2073 | <b>1782</b>   |
| ANTXR1   | 0,657749  | 0,595418  | <b>0,6265835</b> | 2111 | 2660 | <b>2385,5</b> |
| GPANK1   | 0,708179  | 0,545299  | <b>0,626739</b>  | 1729 | 2249 | <b>1989</b>   |
| CNN2     | 0,618606  | 0,635062  | <b>0,626834</b>  | 1948 | 2258 | <b>2103</b>   |
| CNIH2    | 0,607033  | 0,646788  | <b>0,6269105</b> | 1347 | 2151 | <b>1749</b>   |
| AP1AR    | -0,262622 | 1,517019  | <b>0,6271985</b> | 805  | 1555 | <b>1180</b>   |
| DHX37    | 0,647319  | 0,607128  | <b>0,6272235</b> | 1306 | 1560 | <b>1433</b>   |
| FGF8     | 0,748816  | 0,505836  | <b>0,627326</b>  | 1748 | 2595 | <b>2171,5</b> |
| LTBP1    | 0,640625  | 0,614245  | <b>0,627435</b>  | 2162 | 2351 | <b>2256,5</b> |
| LIN7A    | 0,122996  | 1,132141  | <b>0,6275685</b> | 1537 | 1978 | <b>1757,5</b> |
| RFC1     | 0,383661  | 0,871562  | <b>0,6276115</b> | 1799 | 2014 | <b>1906,5</b> |
| GUCY1A2  | -0,092854 | 1,348907  | <b>0,6280265</b> | 1763 | 1802 | <b>1782,5</b> |
| MVP      | 0,709254  | 0,547529  | <b>0,6283915</b> | 1669 | 1699 | <b>1684</b>   |

|          |           |           |                  |      |      |               |
|----------|-----------|-----------|------------------|------|------|---------------|
| ANKRD16  | 0,628459  | NaN       | <b>0,628459</b>  | 1441 | NaN  | <b>1441</b>   |
| CRIP2    | -0,36307  | 1,619998  | <b>0,628464</b>  | 1637 | 1580 | <b>1608,5</b> |
| C7orf68  | 0,950435  | 0,306787  | <b>0,628611</b>  | 1086 | 1689 | <b>1387,5</b> |
| PRR25    | 1,699228  | -0,441936 | <b>0,628646</b>  | 1793 | 1902 | <b>1847,5</b> |
| SH3KBP1  | 0,628894  | NaN       | <b>0,628894</b>  | 1292 | NaN  | <b>1292</b>   |
| NCKAP1L  | 0,82409   | 0,43402   | <b>0,629055</b>  | 1472 | 1986 | <b>1729</b>   |
| GTPBP10  | 0,657776  | 0,600378  | <b>0,629077</b>  | 1465 | 2257 | <b>1861</b>   |
| CC2D1B   | 0,629401  | NaN       | <b>0,629401</b>  | 1673 | NaN  | <b>1673</b>   |
| LMBRD1   | 0,630058  | NaN       | <b>0,630058</b>  | 1935 | NaN  | <b>1935</b>   |
| TACR3    | 0,630189  | NaN       | <b>0,630189</b>  | 1893 | NaN  | <b>1893</b>   |
| SNAPIN   | 0,208238  | 1,052824  | <b>0,630531</b>  | 1656 | 2779 | <b>2217,5</b> |
| ABCA4    | 0,098404  | 1,162702  | <b>0,630553</b>  | 1944 | 1775 | <b>1859,5</b> |
| LIN37    | 0,193167  | 1,068576  | <b>0,6308715</b> | 1817 | 2805 | <b>2311</b>   |
| TMEM146  | 0,679958  | 0,581952  | <b>0,630955</b>  | 1840 | 2274 | <b>2057</b>   |
| ATMIN    | 0,631044  | NaN       | <b>0,631044</b>  | 1463 | NaN  | <b>1463</b>   |
| PIK3C3   | 1,41659   | -0,154474 | <b>0,631058</b>  | 1366 | 2557 | <b>1961,5</b> |
| PPHLN1   | 0,631101  | NaN       | <b>0,631101</b>  | 1180 | NaN  | <b>1180</b>   |
| C6orf15  | 0,775297  | 0,487265  | <b>0,631281</b>  | 1904 | 1960 | <b>1932</b>   |
| BTN2A1   | 0,304973  | 0,958787  | <b>0,63188</b>   | 1306 | 1362 | <b>1334</b>   |
| CCDC141  | 0,631957  | NaN       | <b>0,631957</b>  | 1806 | NaN  | <b>1806</b>   |
| JUB      | 0,490573  | 0,773345  | <b>0,631959</b>  | 1277 | 1545 | <b>1411</b>   |
| CCDC167  | 0,49723   | 0,767031  | <b>0,6321305</b> | 1445 | 1685 | <b>1565</b>   |
| HEXIM2   | 0,632131  | NaN       | <b>0,632131</b>  | 1651 | NaN  | <b>1651</b>   |
| S100A5   | 0,632609  | NaN       | <b>0,632609</b>  | 1928 | NaN  | <b>1928</b>   |
| MED13L   | 0,624398  | 0,641178  | <b>0,632788</b>  | 1649 | 1737 | <b>1693</b>   |
| CLIC4    | 0,475534  | 0,791379  | <b>0,6334565</b> | 912  | 1812 | <b>1362</b>   |
| TNFRSF19 | 0,652819  | 0,614699  | <b>0,633759</b>  | 1749 | 2639 | <b>2194</b>   |
| ADORA2A  | 0,633901  | NaN       | <b>0,633901</b>  | 1976 | NaN  | <b>1976</b>   |
| SLC22A15 | 0,992426  | 0,275418  | <b>0,633922</b>  | 1325 | 2117 | <b>1721</b>   |
| STARD5   | 0,477483  | 0,790785  | <b>0,634134</b>  | 1407 | 1602 | <b>1504,5</b> |
| SLC9A3   | -0,316218 | 1,584784  | <b>0,634283</b>  | 1559 | 2447 | <b>2003</b>   |
| SSFA2    | 0,448882  | 0,819766  | <b>0,634324</b>  | 1680 | 1849 | <b>1764,5</b> |
| THEMIS   | 0,731488  | 0,537266  | <b>0,634377</b>  | 1552 | 2393 | <b>1972,5</b> |
| CLPB     | 1,251964  | 0,017076  | <b>0,63452</b>   | 1516 | 1611 | <b>1563,5</b> |



|          |           |           |                  |      |      |               |
|----------|-----------|-----------|------------------|------|------|---------------|
| TTC30A   | 0,634571  | NaN       | <b>0,634571</b>  | 1857 | NaN  | <b>1857</b>   |
| MEIG1    | 0,760538  | 0,508783  | <b>0,6346605</b> | 1951 | 3030 | <b>2490,5</b> |
| STIP1    | 0,866437  | 0,402935  | <b>0,634686</b>  | 1713 | 1869 | <b>1791</b>   |
| B9D2     | 0,697557  | 0,571903  | <b>0,63473</b>   | 1768 | 2131 | <b>1949,5</b> |
| RHOT2    | 0,417458  | 0,85234   | <b>0,634899</b>  | 1734 | 2848 | <b>2291</b>   |
| FAM175B  | 0,635501  | NaN       | <b>0,635501</b>  | 1746 | NaN  | <b>1746</b>   |
| LRRC8C   | 1,26608   | 0,004931  | <b>0,6355055</b> | 1776 | 2238 | <b>2007</b>   |
| ADNP2    | 0,488714  | 0,783483  | <b>0,6360985</b> | 1613 | 1954 | <b>1783,5</b> |
| CBR1     | 0,720762  | 0,552079  | <b>0,6364205</b> | 1378 | 2277 | <b>1827,5</b> |
| MIS18A   | 1,17774   | 0,095104  | <b>0,636422</b>  | 1995 | 2485 | <b>2240</b>   |
| CCDC116  | 0,934113  | 0,339035  | <b>0,636574</b>  | 1176 | 2025 | <b>1600,5</b> |
| OR51V1   | 0,744961  | 0,528356  | <b>0,6366585</b> | 1699 | 1706 | <b>1702,5</b> |
| TRPC6    | 0,158666  | 1,115083  | <b>0,6368745</b> | 1952 | 2757 | <b>2354,5</b> |
| TH       | 0,32249   | 0,95138   | <b>0,636935</b>  | 1393 | 1993 | <b>1693</b>   |
| ZNF609   | 0,844413  | 0,429522  | <b>0,6369675</b> | 1520 | 1861 | <b>1690,5</b> |
| THNSL1   | 1,098337  | 0,175695  | <b>0,637016</b>  | 1966 | 1739 | <b>1852,5</b> |
| USPL1    | 1,139095  | 0,135308  | <b>0,6372015</b> | 1231 | 1704 | <b>1467,5</b> |
| HIPK4    | 0,429873  | 0,845708  | <b>0,6377905</b> | 1137 | 1965 | <b>1551</b>   |
| C9orf171 | 0,638162  | NaN       | <b>0,638162</b>  | 1693 | NaN  | <b>1693</b>   |
| WNT16    | 0,959277  | 0,317974  | <b>0,6386255</b> | 1711 | 2229 | <b>1970</b>   |
| BTRC     | 0,799121  | 0,478945  | <b>0,639033</b>  | 1817 | 3051 | <b>2434</b>   |
| CD74     | 1,057847  | 0,220303  | <b>0,639075</b>  | 1356 | 1855 | <b>1605,5</b> |
| DAZAP2   | 0,718978  | 0,559311  | <b>0,6391445</b> | 1990 | 2153 | <b>2071,5</b> |
| GP1BA    | 1,042898  | 0,235416  | <b>0,639157</b>  | 1821 | 1755 | <b>1788</b>   |
| TCOF1    | NaN       | 0,639374  | <b>0,639374</b>  | NaN  | 2373 | <b>2373</b>   |
| UBE2A    | -0,019665 | 1,298562  | <b>0,6394485</b> | 1741 | 2444 | <b>2092,5</b> |
| PXDNL    | -0,042524 | 1,322082  | <b>0,639779</b>  | 1794 | 2645 | <b>2219,5</b> |
| USP21    | 0,960775  | 0,319334  | <b>0,6400545</b> | 2090 | 1890 | <b>1990</b>   |
| PREP     | 0,786411  | 0,493737  | <b>0,640074</b>  | 1905 | 2311 | <b>2108</b>   |
| TPPP     | 0,480082  | 0,800078  | <b>0,64008</b>   | 1472 | 2185 | <b>1828,5</b> |
| VCP      | 0,421297  | 0,858933  | <b>0,640115</b>  | 1683 | 1792 | <b>1737,5</b> |
| BPI      | 1,663973  | -0,383013 | <b>0,64048</b>   | 915  | 1904 | <b>1409,5</b> |
| FERMT2   | 0,640646  | NaN       | <b>0,640646</b>  | 1523 | NaN  | <b>1523</b>   |
| C9orf169 | 0,574046  | 0,707514  | <b>0,64078</b>   | 2003 | 1911 | <b>1957</b>   |

|           |          |           |                  |      |      |               |
|-----------|----------|-----------|------------------|------|------|---------------|
| PTPRD     | 0,854778 | 0,42743   | <b>0,641104</b>  | 1320 | 2345 | <b>1832,5</b> |
| MED24     | 1,082013 | 0,200208  | <b>0,6411105</b> | 1622 | 1873 | <b>1747,5</b> |
| RTN4RL1   | 0,915159 | 0,367148  | <b>0,6411535</b> | 1109 | 1554 | <b>1331,5</b> |
| TBP       | 0,642825 | 0,639676  | <b>0,6412505</b> | 1838 | 2174 | <b>2006</b>   |
| DHX29     | 0,853661 | 0,429027  | <b>0,641344</b>  | 841  | 1109 | <b>975</b>    |
| ZNF605    | 1,074352 | 0,208517  | <b>0,6414345</b> | 1707 | 3091 | <b>2399</b>   |
| PARP4     | 0,642861 | 0,640525  | <b>0,641693</b>  | 1166 | 1660 | <b>1413</b>   |
| DLG1      | 0,717769 | 0,565875  | <b>0,641822</b>  | 1932 | 2320 | <b>2126</b>   |
| RNGTT     | 0,69686  | 0,587079  | <b>0,6419695</b> | 1856 | 2182 | <b>2019</b>   |
| ZNF775    | 1,085881 | 0,198851  | <b>0,642366</b>  | 1819 | 2203 | <b>2011</b>   |
| EFCAB1    | 1,140041 | 0,144951  | <b>0,642496</b>  | 1539 | 1983 | <b>1761</b>   |
| ZNF559    | 0,356392 | 0,929299  | <b>0,6428455</b> | 813  | 1362 | <b>1087,5</b> |
| unknown   | 0,425136 | 0,860594  | <b>0,642865</b>  | 1693 | 1885 | <b>1789</b>   |
| C14orf105 | 0,248064 | 1,037915  | <b>0,6429895</b> | 1860 | 2395 | <b>2127,5</b> |
| CNGA1     | 1,085504 | 0,200939  | <b>0,6432215</b> | 1966 | 2972 | <b>2469</b>   |
| THOC7     | 1,404727 | -0,117907 | <b>0,64341</b>   | 1504 | 1832 | <b>1668</b>   |
| MPHOSPH9  | 0,7481   | 0,538911  | <b>0,6435055</b> | 1866 | 2090 | <b>1978</b>   |
| SYTL5     | 0,30731  | 0,980835  | <b>0,6440725</b> | 1353 | 1477 | <b>1415</b>   |
| PANK1     | 0,793165 | 0,495364  | <b>0,6442645</b> | 1697 | 2006 | <b>1851,5</b> |
| BAP1      | 0,055592 | 1,233099  | <b>0,6443455</b> | 1363 | 2161 | <b>1762</b>   |
| COL3A1    | 0,965817 | 0,32296   | <b>0,6443885</b> | 1636 | 2474 | <b>2055</b>   |
| CEP57     | 0,644642 | NaN       | <b>0,644642</b>  | 1546 | NaN  | <b>1546</b>   |
| DPPA4     | 0,806358 | 0,482939  | <b>0,6446485</b> | 2135 | 2144 | <b>2139,5</b> |
| GJC1      | 0,841594 | 0,448638  | <b>0,645116</b>  | 1670 | 1957 | <b>1813,5</b> |
| SGOL2     | 0,584578 | 0,706499  | <b>0,6455385</b> | 1643 | 1750 | <b>1696,5</b> |
| SMC5      | 0,645626 | NaN       | <b>0,645626</b>  | 1391 | NaN  | <b>1391</b>   |
| DEFB1     | 0,645648 | NaN       | <b>0,645648</b>  | 1707 | NaN  | <b>1707</b>   |
| HCK       | 1,246018 | 0,046865  | <b>0,6464415</b> | 1701 | 1983 | <b>1842</b>   |
| BMP2K     | 0,392964 | 0,900004  | <b>0,646484</b>  | 2129 | 2363 | <b>2246</b>   |
| GPBP1     | 1,63447  | -0,341339 | <b>0,6465655</b> | 1772 | 3019 | <b>2395,5</b> |
| PCDHGB1   | 0,168728 | 1,124472  | <b>0,6466</b>    | 1210 | 1696 | <b>1453</b>   |
| LPCAT2    | 0,66956  | 0,623704  | <b>0,646632</b>  | 1690 | 2330 | <b>2010</b>   |
| PYCR1     | 0,313841 | 0,980036  | <b>0,6469385</b> | 1392 | 1793 | <b>1592,5</b> |
| AQR       | 0,257205 | 1,037422  | <b>0,6473135</b> | 1582 | 2039 | <b>1810,5</b> |

|          |           |           |                  |      |      |               |
|----------|-----------|-----------|------------------|------|------|---------------|
| IGSF10   | 0,633902  | 0,66089   | <b>0,647396</b>  | 1853 | 2327 | <b>2090</b>   |
| CAMSAP2  | 0,647675  | NaN       | <b>0,647675</b>  | 1938 | NaN  | <b>1938</b>   |
| ABCF2    | -0,378634 | 1,675203  | <b>0,6482845</b> | 1470 | 1822 | <b>1646</b>   |
| SH3D19   | 1,114591  | 0,182558  | <b>0,6485745</b> | 1973 | 1741 | <b>1857</b>   |
| ZNF543   | 1,089256  | 0,208547  | <b>0,6489015</b> | 1544 | 2370 | <b>1957</b>   |
| ATG13    | 0,546547  | 0,751298  | <b>0,6489225</b> | 2022 | 2012 | <b>2017</b>   |
| TLK1     | 0,391695  | 0,906499  | <b>0,649097</b>  | 1510 | 2082 | <b>1796</b>   |
| DLST     | 0,707733  | 0,590818  | <b>0,6492755</b> | 1733 | 1973 | <b>1853</b>   |
| XIRP2    | 0,815285  | 0,483431  | <b>0,649358</b>  | 1876 | 1603 | <b>1739,5</b> |
| KIAA1539 | 0,763769  | 0,53534   | <b>0,6495545</b> | 1257 | 1637 | <b>1447</b>   |
| SFRP2    | 0,907952  | 0,391325  | <b>0,6496385</b> | 1770 | 1873 | <b>1821,5</b> |
| DHRS12   | 0,649961  | NaN       | <b>0,649961</b>  | 1506 | NaN  | <b>1506</b>   |
| C12orf66 | 1,007224  | 0,293247  | <b>0,6502355</b> | 1321 | 1791 | <b>1556</b>   |
| C3orf35  | 0,638995  | 0,66155   | <b>0,6502725</b> | 1996 | 3140 | <b>2568</b>   |
| DONSON   | 0,650426  | NaN       | <b>0,650426</b>  | 708  | NaN  | <b>708</b>    |
| ERLIN2   | -0,166489 | 1,468142  | <b>0,6508265</b> | 1210 | 1799 | <b>1504,5</b> |
| ZNF416   | 1,178546  | 0,123227  | <b>0,6508865</b> | 1437 | 2247 | <b>1842</b>   |
| NAB2     | 0,452063  | 0,850561  | <b>0,651312</b>  | 1688 | 1769 | <b>1728,5</b> |
| SAP30L   | 0,262136  | 1,041663  | <b>0,6518995</b> | 1368 | 1534 | <b>1451</b>   |
| AMPD2    | 0,483893  | 0,82011   | <b>0,6520015</b> | 1407 | 1717 | <b>1562</b>   |
| C17orf66 | 0,652608  | NaN       | <b>0,652608</b>  | 1975 | NaN  | <b>1975</b>   |
| C6       | -1,085372 | 2,390744  | <b>0,652686</b>  | 1436 | 2002 | <b>1719</b>   |
| USP43    | 1,969131  | -0,663247 | <b>0,652942</b>  | 1112 | 1978 | <b>1545</b>   |
| OR51E2   | 0,653169  | NaN       | <b>0,653169</b>  | 2019 | NaN  | <b>2019</b>   |
| SMYD1    | 1,432866  | -0,125221 | <b>0,6538225</b> | 1127 | 2068 | <b>1597,5</b> |
| HIGD1B   | 0,45898   | 0,849018  | <b>0,653999</b>  | 1301 | 1775 | <b>1538</b>   |
| GALNT10  | 0,524432  | 0,783883  | <b>0,6541575</b> | 1776 | 2015 | <b>1895,5</b> |
| C9orf103 | 0,966595  | 0,342056  | <b>0,6543255</b> | 1706 | 2071 | <b>1888,5</b> |
| OR7E24   | 1,064178  | 0,24535   | <b>0,654764</b>  | 1657 | 2034 | <b>1845,5</b> |
| TFAM     | 0,898597  | 0,411116  | <b>0,6548565</b> | 1951 | 1807 | <b>1879</b>   |
| SOSTDC1  | 0,388582  | 0,922614  | <b>0,655598</b>  | 1697 | 2151 | <b>1924</b>   |
| NRG1     | 0,457078  | 0,854178  | <b>0,655628</b>  | 1697 | 2026 | <b>1861,5</b> |
| VCL      | 0,778248  | 0,534439  | <b>0,6563435</b> | 1632 | 2155 | <b>1893,5</b> |
| CLMN     | -0,31024  | 1,623227  | <b>0,6564935</b> | 2028 | 1638 | <b>1833</b>   |

|          |           |           |                  |      |      |               |
|----------|-----------|-----------|------------------|------|------|---------------|
| HSD17B4  | 0,35908   | 0,953922  | <b>0,656501</b>  | 1762 | 2330 | <b>2046</b>   |
| HIGD2A   | 0,65664   | NaN       | <b>0,65664</b>   | 1556 | NaN  | <b>1556</b>   |
| PACS1    | 0,657048  | NaN       | <b>0,657048</b>  | 1640 | NaN  | <b>1640</b>   |
| SLC25A31 | 0,657419  | NaN       | <b>0,657419</b>  | 1318 | NaN  | <b>1318</b>   |
| ING1     | -0,038174 | 1,353247  | <b>0,6575365</b> | 1586 | 2058 | <b>1822</b>   |
| C7orf60  | 0,701833  | 0,613256  | <b>0,6575445</b> | 1623 | 2247 | <b>1935</b>   |
| PANK3    | 0,005859  | 1,309287  | <b>0,657573</b>  | 1780 | 1955 | <b>1867,5</b> |
| S100A13  | 1,76378   | -0,448397 | <b>0,6576915</b> | 1548 | 1846 | <b>1697</b>   |
| UPF3B    | 1,158997  | 0,156586  | <b>0,6577915</b> | 1839 | 1968 | <b>1903,5</b> |
| DUSP4    | 1,286174  | 0,029757  | <b>0,6579655</b> | 1131 | 2484 | <b>1807,5</b> |
| OR52M1   | 0,634383  | 0,681947  | <b>0,658165</b>  | 1725 | 2227 | <b>1976</b>   |
| SLC18A1  | 0,411312  | 0,905081  | <b>0,6581965</b> | 1551 | 2026 | <b>1788,5</b> |
| OSBPL1A  | 0,284701  | 1,031949  | <b>0,658325</b>  | 1909 | 2177 | <b>2043</b>   |
| UPB1     | 0,096599  | 1,220089  | <b>0,658344</b>  | 1826 | 3308 | <b>2567</b>   |
| DAPL1    | 0,65874   | NaN       | <b>0,65874</b>   | 1590 | NaN  | <b>1590</b>   |
| NALCN    | 1,394657  | -0,077036 | <b>0,6588105</b> | 1920 | 2639 | <b>2279,5</b> |
| TPTE2    | 1,517021  | -0,199185 | <b>0,658918</b>  | 1850 | 2300 | <b>2075</b>   |
| PDZD4    | 0,659168  | NaN       | <b>0,659168</b>  | 1472 | NaN  | <b>1472</b>   |
| GPR115   | 0,659226  | NaN       | <b>0,659226</b>  | 1372 | NaN  | <b>1372</b>   |
| ARSE     | 1,196743  | 0,121757  | <b>0,65925</b>   | 1956 | 2070 | <b>2013</b>   |
| HSD17B14 | 0,125661  | 1,193275  | <b>0,659468</b>  | 1817 | 2232 | <b>2024,5</b> |
| ZNF32    | 0,824219  | 0,494964  | <b>0,6595915</b> | 1252 | 2118 | <b>1685</b>   |
| VAR52    | 0,546764  | 0,773784  | <b>0,660274</b>  | 1768 | 2805 | <b>2286,5</b> |
| EIF4H    | 0,304322  | 1,016798  | <b>0,66056</b>   | 1562 | 1482 | <b>1522</b>   |
| ANTXR2   | 0,314148  | 1,007204  | <b>0,660676</b>  | 1420 | 2113 | <b>1766,5</b> |
| ATP2A3   | 0,461351  | 0,860035  | <b>0,660693</b>  | 1776 | 2391 | <b>2083,5</b> |
| SLC4A2   | 0,445083  | 0,876505  | <b>0,660794</b>  | 1563 | 2036 | <b>1799,5</b> |
| ALPL     | -0,105592 | 1,427248  | <b>0,660828</b>  | 1806 | 2565 | <b>2185,5</b> |
| LUM      | 0,745985  | 0,576516  | <b>0,6612505</b> | 1653 | 2320 | <b>1986,5</b> |
| TPM4     | NaN       | 0,661283  | <b>0,661283</b>  | NaN  | 2807 | <b>2807</b>   |
| TMEM70   | 0,058784  | 1,263939  | <b>0,6613615</b> | 2055 | 2908 | <b>2481,5</b> |
| JHDM1D   | 0,759486  | 0,563451  | <b>0,6614685</b> | 1882 | 3117 | <b>2499,5</b> |
| NUS1     | 0,661591  | NaN       | <b>0,661591</b>  | 1294 | NaN  | <b>1294</b>   |
| NAE1     | 0,880968  | 0,442437  | <b>0,6617025</b> | 1882 | 2033 | <b>1957,5</b> |

|          |           |           |                  |      |      |               |
|----------|-----------|-----------|------------------|------|------|---------------|
| NIPAL2   | 0,661721  | NaN       | <b>0,661721</b>  | 1901 | NaN  | <b>1901</b>   |
| UBE2V2   | 1,329402  | -0,005741 | <b>0,6618305</b> | 1762 | 1910 | <b>1836</b>   |
| TARP     | 0,819591  | 0,50454   | <b>0,6620655</b> | 1731 | 2586 | <b>2158,5</b> |
| BZW2     | 0,877796  | 0,446741  | <b>0,6622685</b> | 1887 | 2521 | <b>2204</b>   |
| LYZ      | -2,414164 | 3,738754  | <b>0,662295</b>  | 1203 | 1716 | <b>1459,5</b> |
| HINT2    | 1,601776  | -0,276399 | <b>0,6626885</b> | 1362 | 1201 | <b>1281,5</b> |
| HOXC8    | 0,847227  | 0,478211  | <b>0,662719</b>  | 1884 | 1672 | <b>1778</b>   |
| DNAJC5   | 0,64664   | 0,679044  | <b>0,662842</b>  | 1609 | 2060 | <b>1834,5</b> |
| CBX7     | 0,989425  | 0,336411  | <b>0,662918</b>  | 1417 | 1649 | <b>1533</b>   |
| GALNT13  | 1,578218  | -0,252342 | <b>0,662938</b>  | 1059 | 1647 | <b>1353</b>   |
| SPATA16  | 0,663019  | NaN       | <b>0,663019</b>  | 1914 | NaN  | <b>1914</b>   |
| PAPOLB   | 1,126501  | 0,200472  | <b>0,6634865</b> | 2024 | 2061 | <b>2042,5</b> |
| SLC23A3  | 1,259345  | 0,067633  | <b>0,663489</b>  | 1289 | 1739 | <b>1514</b>   |
| EPS8     | 0,912973  | 0,414051  | <b>0,663512</b>  | 1741 | 2161 | <b>1951</b>   |
| C6orf126 | 0,663756  | NaN       | <b>0,663756</b>  | 1307 | NaN  | <b>1307</b>   |
| HTR1E    | 0,663885  | NaN       | <b>0,663885</b>  | 1517 | NaN  | <b>1517</b>   |
| HEATR6   | 0,782794  | 0,545147  | <b>0,6639705</b> | 2012 | 2862 | <b>2437</b>   |
| SSR1     | 0,664045  | NaN       | <b>0,664045</b>  | 1416 | NaN  | <b>1416</b>   |
| NDUFS4   | -0,445766 | 1,77418   | <b>0,664207</b>  | 1967 | 2596 | <b>2281,5</b> |
| ZNF226   | 0,328856  | 1,000101  | <b>0,6644785</b> | 1791 | 3091 | <b>2441</b>   |
| RNF146   | 1,196068  | 0,133821  | <b>0,6649445</b> | 1983 | 2024 | <b>2003,5</b> |
| USP20    | 0,144475  | 1,185572  | <b>0,6650235</b> | 1261 | 1837 | <b>1549</b>   |
| SLC5A11  | 0,929216  | 0,400854  | <b>0,665035</b>  | 1676 | 2110 | <b>1893</b>   |
| PRDM2    | 1,247303  | 0,082837  | <b>0,66507</b>   | 1584 | 2173 | <b>1878,5</b> |
| AEN      | 0,665421  | NaN       | <b>0,665421</b>  | 1653 | NaN  | <b>1653</b>   |
| GNA14    | 0,746799  | 0,584249  | <b>0,665524</b>  | 1505 | 2373 | <b>1939</b>   |
| ZFP90    | 1,068156  | 0,263029  | <b>0,6655925</b> | 1765 | 2088 | <b>1926,5</b> |
| AP1S1    | 1,72857   | -0,396989 | <b>0,6657905</b> | 1396 | 2172 | <b>1784</b>   |
| TRMT112  | 0,739257  | 0,593349  | <b>0,666303</b>  | 1606 | 1688 | <b>1647</b>   |
| C7orf50  | 0,666366  | NaN       | <b>0,666366</b>  | 1484 | NaN  | <b>1484</b>   |
| LSM14B   | 0,808196  | 0,525607  | <b>0,6669015</b> | 1667 | 2221 | <b>1944</b>   |
| NPHP4    | 0,651432  | 0,682504  | <b>0,666968</b>  | 2081 | 1891 | <b>1986</b>   |
| APOC3    | 0,915341  | 0,418968  | <b>0,6671545</b> | 1484 | 2118 | <b>1801</b>   |
| EXOC4    | 0,473801  | 0,860683  | <b>0,667242</b>  | 1834 | 1819 | <b>1826,5</b> |

|           |           |           |                  |      |      |               |
|-----------|-----------|-----------|------------------|------|------|---------------|
| ADCY3     | 1,263688  | 0,071707  | <b>0,6676975</b> | 1748 | 2018 | <b>1883</b>   |
| GALNT6    | 1,206506  | 0,129189  | <b>0,6678475</b> | 1478 | 2036 | <b>1757</b>   |
| BPGM      | 1,558457  | -0,222761 | <b>0,667848</b>  | 1318 | 1939 | <b>1628,5</b> |
| DGAT1     | -0,195722 | 1,531426  | <b>0,667852</b>  | 1680 | 2016 | <b>1848</b>   |
| LINGO4    | 0,667891  | NaN       | <b>0,667891</b>  | 1703 | NaN  | <b>1703</b>   |
| PITPNB    | 0,667963  | NaN       | <b>0,667963</b>  | 1594 | NaN  | <b>1594</b>   |
| OR2B2     | 0,706884  | 0,629177  | <b>0,6680305</b> | 1696 | 2121 | <b>1908,5</b> |
| FAM155B   | 0,731912  | 0,604266  | <b>0,668089</b>  | 2077 | 1394 | <b>1735,5</b> |
| ABCD2     | NaN       | 0,668463  | <b>0,668463</b>  | NaN  | 2991 | <b>2991</b>   |
| ARHGAP4   | 1,215974  | 0,121244  | <b>0,668609</b>  | 1495 | 1659 | <b>1577</b>   |
| LANCL1    | 0,669094  | NaN       | <b>0,669094</b>  | 1702 | NaN  | <b>1702</b>   |
| PRC1      | 0,669299  | NaN       | <b>0,669299</b>  | 2081 | NaN  | <b>2081</b>   |
| ELF1      | 1,186615  | 0,153338  | <b>0,6699765</b> | 1548 | 2003 | <b>1775,5</b> |
| BTN2A2    | 0,670713  | NaN       | <b>0,670713</b>  | 1747 | NaN  | <b>1747</b>   |
| MAEL      | 0,390973  | 0,950469  | <b>0,670721</b>  | 1834 | 1849 | <b>1841,5</b> |
| TTC39B    | 0,595984  | 0,746175  | <b>0,6710795</b> | 1787 | 2291 | <b>2039</b>   |
| PPAPDC1B  | 0,575538  | 0,767207  | <b>0,6713725</b> | 1829 | 2898 | <b>2363,5</b> |
| FLNC      | 0,499119  | 0,843671  | <b>0,671395</b>  | 579  | 758  | <b>668,5</b>  |
| PPP2R5E   | 0,431772  | 0,911802  | <b>0,671787</b>  | 2191 | 2421 | <b>2306</b>   |
| SLITRK6   | 0,008914  | 1,335251  | <b>0,6720825</b> | 1845 | 1818 | <b>1831,5</b> |
| PXMP2     | 0,239524  | 1,105023  | <b>0,6722735</b> | 1883 | 1824 | <b>1853,5</b> |
| C20orf160 | 0,231671  | 1,113776  | <b>0,6727235</b> | 1625 | 2098 | <b>1861,5</b> |
| TMEM30A   | 0,224085  | 1,121529  | <b>0,672807</b>  | 1955 | 1830 | <b>1892,5</b> |
| MAPK3     | 0,757819  | 0,588478  | <b>0,6731485</b> | 1032 | 1502 | <b>1267</b>   |
| EFCAB5    | 0,769653  | 0,577416  | <b>0,6735345</b> | 1758 | 1796 | <b>1777</b>   |
| YWHAQ     | 0,577206  | 0,769913  | <b>0,6735595</b> | 1016 | 1791 | <b>1403,5</b> |
| GAS1      | 0,787015  | 0,560127  | <b>0,673571</b>  | 1387 | 1736 | <b>1561,5</b> |
| RBM47     | 0,375299  | 0,972066  | <b>0,6736825</b> | 1453 | 1295 | <b>1374</b>   |
| FAM55A    | 0,674036  | NaN       | <b>0,674036</b>  | 1966 | NaN  | <b>1966</b>   |
| KCTD21    | 0,674272  | NaN       | <b>0,674272</b>  | 1501 | NaN  | <b>1501</b>   |
| KIF16B    | 0,570304  | 0,77949   | <b>0,674897</b>  | 2134 | 2912 | <b>2523</b>   |
| TGFBR3    | 1,167429  | 0,183106  | <b>0,6752675</b> | 2193 | 1960 | <b>2076,5</b> |
| C9orf84   | 0,190471  | 1,160075  | <b>0,675273</b>  | 1769 | 2109 | <b>1939</b>   |
| CABLES1   | 1,161288  | 0,189316  | <b>0,675302</b>  | 2338 | 2241 | <b>2289,5</b> |

|            |           |           |                  |      |      |               |
|------------|-----------|-----------|------------------|------|------|---------------|
| GABRA3     | 0,864229  | 0,486627  | <b>0,675428</b>  | 1266 | 2477 | <b>1871,5</b> |
| LCN15      | -0,025388 | 1,376375  | <b>0,6754935</b> | 1767 | 1575 | <b>1671</b>   |
| MTFMT      | 0,102929  | 1,250418  | <b>0,6766735</b> | 1880 | 2487 | <b>2183,5</b> |
| ADAMTS2    | 1,031228  | 0,322167  | <b>0,6766975</b> | 1121 | 1339 | <b>1230</b>   |
| HS6ST2     | -1,235933 | 2,589541  | <b>0,676804</b>  | 2053 | 1980 | <b>2016,5</b> |
| TRAF7      | 0,43638   | 0,919129  | <b>0,6777545</b> | 1291 | 2400 | <b>1845,5</b> |
| ALG13      | 0,473742  | 0,881815  | <b>0,6777785</b> | 1598 | 2203 | <b>1900,5</b> |
| MUC17      | 0,799588  | 0,556325  | <b>0,6779565</b> | 1513 | 2308 | <b>1910,5</b> |
| CELSR1     | 0,678023  | NaN       | <b>0,678023</b>  | 1757 | NaN  | <b>1757</b>   |
| TDP1       | 0,781415  | 0,57511   | <b>0,6782625</b> | 1815 | 2129 | <b>1972</b>   |
| GLT8D1     | 0,577752  | 0,77879   | <b>0,678271</b>  | 1972 | 2246 | <b>2109</b>   |
| ST6GALNAC3 | 0,474931  | 0,881881  | <b>0,678406</b>  | 1553 | 1843 | <b>1698</b>   |
| TNKS1BP1   | 0,662735  | 0,694954  | <b>0,6788445</b> | 1942 | 1935 | <b>1938,5</b> |
| PRDX3      | 0,731096  | 0,626769  | <b>0,6789325</b> | 1849 | 2202 | <b>2025,5</b> |
| PABPC5     | 0,990898  | 0,367204  | <b>0,679051</b>  | 2018 | 1183 | <b>1600,5</b> |
| HHAT       | 0,529256  | 0,828862  | <b>0,679059</b>  | 1805 | 2441 | <b>2123</b>   |
| TSGA14     | 1,457151  | -0,098521 | <b>0,679315</b>  | 1556 | 2197 | <b>1876,5</b> |
| DDIT4      | 0,877106  | 0,48186   | <b>0,679483</b>  | 1701 | 1573 | <b>1637</b>   |
| DOK5       | 0,684318  | 0,674711  | <b>0,6795145</b> | 1806 | 2000 | <b>1903</b>   |
| CDA        | NaN       | 0,67979   | <b>0,67979</b>   | NaN  | 2254 | <b>2254</b>   |
| SLC38A2    | -0,08627  | 1,445991  | <b>0,6798605</b> | 1450 | 2529 | <b>1989,5</b> |
| FSTL4      | 1,874087  | -0,513927 | <b>0,68008</b>   | 1437 | 2275 | <b>1856</b>   |
| MRPL39     | 0,930877  | 0,429491  | <b>0,680184</b>  | 1668 | 1862 | <b>1765</b>   |
| OCRL       | 0,66936   | 0,691049  | <b>0,6802045</b> | 1730 | 2101 | <b>1915,5</b> |
| KRT19      | 0,187576  | 1,172994  | <b>0,680285</b>  | 1718 | 2320 | <b>2019</b>   |
| PTPRC      | 1,124221  | 0,236369  | <b>0,680295</b>  | 1734 | 1960 | <b>1847</b>   |
| C12orf5    | 0,363602  | 0,997091  | <b>0,6803465</b> | 1815 | 2504 | <b>2159,5</b> |
| CDC73      | 0,880599  | 0,480306  | <b>0,6804525</b> | 1795 | 2321 | <b>2058</b>   |
| WFDC3      | 0,240362  | 1,120766  | <b>0,680564</b>  | 1503 | 2430 | <b>1966,5</b> |
| IGSF5      | 0,49788   | 0,863827  | <b>0,6808535</b> | 1650 | 2049 | <b>1849,5</b> |
| MC2R       | 0,681121  | NaN       | <b>0,681121</b>  | 1493 | NaN  | <b>1493</b>   |
| ZNF500     | 1,235276  | 0,127312  | <b>0,681294</b>  | 1654 | 1734 | <b>1694</b>   |
| C2orf85    | 0,681364  | NaN       | <b>0,681364</b>  | 1184 | NaN  | <b>1184</b>   |
| LONRF1     | 0,670614  | 0,692423  | <b>0,6815185</b> | 1639 | 2524 | <b>2081,5</b> |

|          |           |          |                  |      |      |               |
|----------|-----------|----------|------------------|------|------|---------------|
| OR5D18   | 0,681906  | NaN      | <b>0,681906</b>  | 2090 | NaN  | <b>2090</b>   |
| FKBP4    | -0,022047 | 1,386887 | <b>0,68242</b>   | 2036 | 1937 | <b>1986,5</b> |
| TRIM10   | 0,589394  | 0,775748 | <b>0,682571</b>  | 1955 | 2349 | <b>2152</b>   |
| METTL19  | 0,244475  | 1,121248 | <b>0,6828615</b> | 1780 | 2572 | <b>2176</b>   |
| NANP     | 1,151099  | 0,215393 | <b>0,683246</b>  | 1428 | 1864 | <b>1646</b>   |
| GDPD4    | 1,174329  | 0,192231 | <b>0,68328</b>   | 1931 | 2258 | <b>2094,5</b> |
| SLC35D2  | 0,393488  | 0,973144 | <b>0,683316</b>  | 1823 | 2596 | <b>2209,5</b> |
| NCOA6    | 0,43488   | 0,932027 | <b>0,6834535</b> | 1291 | 2487 | <b>1889</b>   |
| NDST1    | 0,335292  | 1,032373 | <b>0,6838325</b> | 1778 | 2224 | <b>2001</b>   |
| TROVE2   | -0,108485 | 1,476699 | <b>0,684107</b>  | 1595 | 2266 | <b>1930,5</b> |
| HTR1F    | 0,684178  | NaN      | <b>0,684178</b>  | 1963 | NaN  | <b>1963</b>   |
| IFT88    | 1,161202  | 0,207156 | <b>0,684179</b>  | 1855 | 2004 | <b>1929,5</b> |
| ASAP1    | 0,684346  | NaN      | <b>0,684346</b>  | 1629 | NaN  | <b>1629</b>   |
| DPPA3    | 0,684401  | NaN      | <b>0,684401</b>  | 1784 | NaN  | <b>1784</b>   |
| FAM19A4  | 0,930539  | 0,439303 | <b>0,684921</b>  | 1551 | 1763 | <b>1657</b>   |
| SERTAD1  | 1,322848  | 0,047221 | <b>0,6850345</b> | 1685 | 2684 | <b>2184,5</b> |
| UBXN10   | -0,085102 | 1,456313 | <b>0,6856055</b> | 1358 | 1994 | <b>1676</b>   |
| BAI2     | 0,685633  | NaN      | <b>0,685633</b>  | 1279 | NaN  | <b>1279</b>   |
| SF3B2    | 0,958254  | 0,413749 | <b>0,6860015</b> | 877  | 961  | <b>919</b>    |
| OVCH2    | -0,823987 | 2,196735 | <b>0,686374</b>  | 1974 | 2834 | <b>2404</b>   |
| ISG20    | 0,280502  | 1,093449 | <b>0,6869755</b> | 1804 | 2693 | <b>2248,5</b> |
| VTI1B    | 0,976837  | 0,39754  | <b>0,6871885</b> | 1741 | 1825 | <b>1783</b>   |
| GNAQ     | 0,911923  | 0,462805 | <b>0,687364</b>  | 1609 | 2024 | <b>1816,5</b> |
| POGK     | 0,973898  | 0,401706 | <b>0,687802</b>  | 1706 | 2958 | <b>2332</b>   |
| SRRM4    | 0,113068  | 1,263073 | <b>0,6880705</b> | 1457 | 1501 | <b>1479</b>   |
| TMEM188  | 0,210073  | 1,166129 | <b>0,688101</b>  | 2234 | 3366 | <b>2800</b>   |
| ANGPTL4  | 0,688273  | NaN      | <b>0,688273</b>  | 1238 | NaN  | <b>1238</b>   |
| UPK1B    | -0,331189 | 1,707988 | <b>0,6883995</b> | 1939 | 1832 | <b>1885,5</b> |
| TCTEX1D1 | 0,155564  | 1,221333 | <b>0,6884485</b> | 2066 | 3036 | <b>2551</b>   |
| NCS1     | 0,170451  | 1,207484 | <b>0,6889675</b> | 1983 | 1984 | <b>1983,5</b> |
| POMT1    | 1,127805  | 0,250872 | <b>0,6893385</b> | 1325 | 2389 | <b>1857</b>   |
| SETD5    | 0,859967  | 0,518712 | <b>0,6893395</b> | 2022 | 2176 | <b>2099</b>   |
| SCARF1   | 0,689388  | NaN      | <b>0,689388</b>  | 1080 | NaN  | <b>1080</b>   |
| OR2Y1    | 0,838349  | 0,540478 | <b>0,6894135</b> | 1741 | 1883 | <b>1812</b>   |



|           |           |           |                  |      |      |               |
|-----------|-----------|-----------|------------------|------|------|---------------|
| BYSL      | 0,68953   | NaN       | <b>0,68953</b>   | 1074 | NaN  | <b>1074</b>   |
| ZNF618    | 1,05681   | 0,322887  | <b>0,6898485</b> | 1411 | 1813 | <b>1612</b>   |
| TMEM107   | 0,494723  | 0,885447  | <b>0,690085</b>  | 1535 | 2110 | <b>1822,5</b> |
| PIK3R3    | 0,947771  | 0,43316   | <b>0,6904655</b> | 1466 | 1695 | <b>1580,5</b> |
| LACTB     | 0,690509  | NaN       | <b>0,690509</b>  | 1516 | NaN  | <b>1516</b>   |
| G6PC      | 1,009437  | 0,371772  | <b>0,6906045</b> | 1865 | 2215 | <b>2040</b>   |
| KRTAP13-2 | 0,541811  | 0,839767  | <b>0,690789</b>  | 1479 | 2408 | <b>1943,5</b> |
| SLC14A2   | 0,625354  | 0,756462  | <b>0,690908</b>  | 1030 | 1138 | <b>1084</b>   |
| C15orf2   | 1,069398  | 0,312488  | <b>0,690943</b>  | 1974 | 2341 | <b>2157,5</b> |
| APOA4     | 1,218441  | 0,163525  | <b>0,690983</b>  | 1492 | 1564 | <b>1528</b>   |
| MUM1      | 0,739182  | 0,643089  | <b>0,6911355</b> | 1392 | 1530 | <b>1461</b>   |
| TMEM176B  | 0,593681  | 0,788978  | <b>0,6913295</b> | 1162 | 1528 | <b>1345</b>   |
| GJA5      | NaN       | 0,691412  | <b>0,691412</b>  | NaN  | 2273 | <b>2273</b>   |
| SHANK3    | 1,472756  | -0,089717 | <b>0,6915195</b> | 2261 | 2087 | <b>2174</b>   |
| THPO      | 0,46497   | 0,91826   | <b>0,691615</b>  | 1268 | 1851 | <b>1559,5</b> |
| DNM1L     | 1,22848   | 0,154751  | <b>0,6916155</b> | 1683 | 1853 | <b>1768</b>   |
| PRND      | 0,578234  | 0,805291  | <b>0,6917625</b> | 2227 | 2349 | <b>2288</b>   |
| NPAS2     | 1,253271  | 0,130757  | <b>0,692014</b>  | 1646 | 1998 | <b>1822</b>   |
| TNMD      | 0,69221   | NaN       | <b>0,69221</b>   | 1554 | NaN  | <b>1554</b>   |
| SNRPB2    | 0,813348  | 0,571663  | <b>0,6925055</b> | 1241 | 1776 | <b>1508,5</b> |
| SNX9      | 0,660348  | 0,726828  | <b>0,693588</b>  | 1680 | 1703 | <b>1691,5</b> |
| TAS2R7    | 0,693723  | NaN       | <b>0,693723</b>  | 1594 | NaN  | <b>1594</b>   |
| UGT3A2    | 0,517634  | 0,869914  | <b>0,693774</b>  | 1732 | 1888 | <b>1810</b>   |
| RCAN2     | 0,693967  | NaN       | <b>0,693967</b>  | 1799 | NaN  | <b>1799</b>   |
| C11orf68  | 0,163484  | 1,224983  | <b>0,6942335</b> | 1219 | 1659 | <b>1439</b>   |
| RDH16     | 0,694322  | NaN       | <b>0,694322</b>  | 879  | NaN  | <b>879</b>    |
| ASPRV1    | 0,21584   | 1,173     | <b>0,69442</b>   | 1952 | 2530 | <b>2241</b>   |
| FAIM2     | -0,385998 | 1,774997  | <b>0,6944995</b> | 1478 | 1886 | <b>1682</b>   |
| SNCG      | 0,174397  | 1,214653  | <b>0,694525</b>  | 1441 | 2207 | <b>1824</b>   |
| C7orf58   | 0,825122  | 0,564184  | <b>0,694653</b>  | 1954 | 1798 | <b>1876</b>   |
| ZNF461    | 0,694724  | NaN       | <b>0,694724</b>  | 1956 | NaN  | <b>1956</b>   |
| CDKL3     | 0,676014  | 0,713652  | <b>0,694833</b>  | 1226 | 1415 | <b>1320,5</b> |
| TM4SF20   | 0,833745  | 0,555923  | <b>0,694834</b>  | 1500 | 1863 | <b>1681,5</b> |
| STT3A     | 0,950754  | 0,43895   | <b>0,694852</b>  | 2072 | 1957 | <b>2014,5</b> |

|          |           |           |                  |      |      |               |
|----------|-----------|-----------|------------------|------|------|---------------|
| C1orf38  | 1,038029  | 0,352067  | <b>0,695048</b>  | 1771 | 2617 | <b>2194</b>   |
| FOXRED1  | 0,695108  | NaN       | <b>0,695108</b>  | 1727 | NaN  | <b>1727</b>   |
| LAMTOR2  | 0,950381  | 0,439971  | <b>0,695176</b>  | 765  | 829  | <b>797</b>    |
| SLITRK1  | 0,550247  | 0,842362  | <b>0,6963045</b> | 1746 | 1930 | <b>1838</b>   |
| PGPEP1   | 0,472672  | 0,920275  | <b>0,6964735</b> | 1161 | 2004 | <b>1582,5</b> |
| CD79B    | 1,3905    | 0,002648  | <b>0,696574</b>  | 1660 | 2264 | <b>1962</b>   |
| PSMD5    | 0,696583  | NaN       | <b>0,696583</b>  | 1692 | NaN  | <b>1692</b>   |
| EID2B    | 0,696609  | NaN       | <b>0,696609</b>  | 1606 | NaN  | <b>1606</b>   |
| PQLC1    | 0,696754  | NaN       | <b>0,696754</b>  | 1543 | NaN  | <b>1543</b>   |
| C17orf78 | 0,696787  | NaN       | <b>0,696787</b>  | 1160 | NaN  | <b>1160</b>   |
| GLB1L    | 0,697436  | NaN       | <b>0,697436</b>  | 1454 | NaN  | <b>1454</b>   |
| CLDN23   | 0,281379  | 1,113704  | <b>0,6975415</b> | 1728 | 1658 | <b>1693</b>   |
| FAM83G   | 1,377339  | 0,017992  | <b>0,6976655</b> | 1294 | 1721 | <b>1507,5</b> |
| C1orf101 | 0,626399  | 0,769622  | <b>0,6980105</b> | 1180 | 2437 | <b>1808,5</b> |
| ADSS     | 1,706634  | -0,309704 | <b>0,698465</b>  | 1483 | 1909 | <b>1696</b>   |
| RLTPR    | 0,698592  | NaN       | <b>0,698592</b>  | 1370 | NaN  | <b>1370</b>   |
| TMEM231  | 0,394018  | 1,00376   | <b>0,698889</b>  | 1553 | 2461 | <b>2007</b>   |
| PGC      | 1,642287  | -0,244502 | <b>0,6988925</b> | 1636 | 1975 | <b>1805,5</b> |
| SRM      | NaN       | 0,698901  | <b>0,698901</b>  | NaN  | 2441 | <b>2441</b>   |
| FAM117B  | 0,178133  | 1,219892  | <b>0,6990125</b> | 1826 | 1071 | <b>1448,5</b> |
| ADAMTS15 | 1,499723  | -0,10147  | <b>0,6991265</b> | 1660 | 1728 | <b>1694</b>   |
| FAF2     | 0,875377  | 0,52412   | <b>0,6997485</b> | 1823 | 3074 | <b>2448,5</b> |
| ZFP36L2  | 0,16648   | 1,233152  | <b>0,699816</b>  | 1633 | 2263 | <b>1948</b>   |
| TRIM69   | -0,007553 | 1,407339  | <b>0,699893</b>  | 1506 | 2214 | <b>1860</b>   |
| TMEM211  | 0,700203  | NaN       | <b>0,700203</b>  | 965  | NaN  | <b>965</b>    |
| DENND1A  | -0,088823 | 1,489898  | <b>0,7005375</b> | 1552 | 1648 | <b>1600</b>   |
| IFIH1    | 0,230331  | 1,170779  | <b>0,700555</b>  | 1985 | 2574 | <b>2279,5</b> |
| ORC1     | 0,68954   | 0,711763  | <b>0,7006515</b> | 1232 | 2008 | <b>1620</b>   |
| F7       | 1,106444  | 0,294959  | <b>0,7007015</b> | 1303 | 2068 | <b>1685,5</b> |
| TADA1    | 0,959398  | 0,442497  | <b>0,7009475</b> | 1734 | 1882 | <b>1808</b>   |
| SUPT16H  | 0,770862  | 0,631187  | <b>0,7010245</b> | 878  | 2107 | <b>1492,5</b> |
| ARSA     | 1,212197  | 0,190596  | <b>0,7013965</b> | 1837 | 2269 | <b>2053</b>   |
| C17orf90 | 0,701419  | NaN       | <b>0,701419</b>  | 1907 | NaN  | <b>1907</b>   |
| FAM149B1 | 0,893062  | 0,511072  | <b>0,702067</b>  | 1449 | 2001 | <b>1725</b>   |

|          |          |           |                  |      |      |               |
|----------|----------|-----------|------------------|------|------|---------------|
| PLEKHA7  | 0,702325 | NaN       | <b>0,702325</b>  | 1679 | NaN  | <b>1679</b>   |
| RARRES3  | NaN      | 0,702353  | <b>0,702353</b>  | NaN  | 2127 | <b>2127</b>   |
| LRRC16A  | 0,392875 | 1,011946  | <b>0,7024105</b> | 1421 | 1745 | <b>1583</b>   |
| GLS2     | 0,581848 | 0,823007  | <b>0,7024275</b> | 1590 | 2184 | <b>1887</b>   |
| TTL      | 0,81631  | 0,588666  | <b>0,702488</b>  | 1171 | 1699 | <b>1435</b>   |
| KIAA0825 | 0,702665 | NaN       | <b>0,702665</b>  | 1705 | NaN  | <b>1705</b>   |
| SPATA5   | 0,449197 | 0,956451  | <b>0,702824</b>  | 1730 | 2980 | <b>2355</b>   |
| DDAH2    | 0,593161 | 0,813284  | <b>0,7032225</b> | 1670 | 1660 | <b>1665</b>   |
| SMOC1    | 0,740106 | 0,666886  | <b>0,703496</b>  | 1601 | 1407 | <b>1504</b>   |
| TTC22    | 0,143483 | 1,26409   | <b>0,7037865</b> | 1879 | 2570 | <b>2224,5</b> |
| ZCCHC11  | 0,114483 | 1,293496  | <b>0,7039895</b> | 1998 | 2045 | <b>2021,5</b> |
| HSD11B1L | 0,864348 | 0,543914  | <b>0,704131</b>  | 1875 | 2974 | <b>2424,5</b> |
| SLC26A3  | 0,234076 | 1,174215  | <b>0,7041455</b> | 1759 | 2730 | <b>2244,5</b> |
| ZFAND2B  | 1,117806 | 0,290796  | <b>0,704301</b>  | 1390 | 2091 | <b>1740,5</b> |
| FANCC    | 0,99494  | 0,414362  | <b>0,704651</b>  | 1595 | 2712 | <b>2153,5</b> |
| DIO2     | 0,619141 | 0,790941  | <b>0,705041</b>  | 1546 | 1749 | <b>1647,5</b> |
| NPR2     | 0,705063 | NaN       | <b>0,705063</b>  | 2103 | NaN  | <b>2103</b>   |
| OR8D4    | 0,881365 | 0,528892  | <b>0,7051285</b> | 2098 | 1868 | <b>1983</b>   |
| SMC6     | 0,70569  | NaN       | <b>0,70569</b>   | 1635 | NaN  | <b>1635</b>   |
| ZNF329   | 1,049057 | 0,362505  | <b>0,705781</b>  | 1445 | 1566 | <b>1505,5</b> |
| RPS6KA1  | 0,767858 | 0,644286  | <b>0,706072</b>  | 1774 | 1864 | <b>1819</b>   |
| IL32     | 1,410582 | 0,001873  | <b>0,7062275</b> | 1697 | 1751 | <b>1724</b>   |
| ACAP3    | 1,081609 | 0,33142   | <b>0,7065145</b> | 1403 | 1598 | <b>1500,5</b> |
| PRKACA   | 0,191533 | 1,22167   | <b>0,7066015</b> | 1968 | 1306 | <b>1637</b>   |
| PTPRE    | 0,817231 | 0,596002  | <b>0,7066165</b> | 1560 | 1923 | <b>1741,5</b> |
| CSTF2T   | 0,443876 | 0,969393  | <b>0,7066345</b> | 1752 | 1959 | <b>1855,5</b> |
| SOX7     | 0,747024 | 0,666612  | <b>0,706818</b>  | 1503 | 1605 | <b>1554</b>   |
| CACNA1F  | 0,816899 | 0,59683   | <b>0,7068645</b> | 1528 | 2712 | <b>2120</b>   |
| CDC40    | 1,023807 | 0,390503  | <b>0,707155</b>  | 1033 | 1335 | <b>1184</b>   |
| PCDHB11  | 1,313436 | 0,101025  | <b>0,7072305</b> | 1474 | 2179 | <b>1826,5</b> |
| SPATA21  | 1,296085 | 0,118912  | <b>0,7074985</b> | 1608 | 2154 | <b>1881</b>   |
| FRMD1    | 0,380387 | 1,034977  | <b>0,707682</b>  | 1663 | 2345 | <b>2004</b>   |
| TPP1     | 1,954762 | -0,539244 | <b>0,707759</b>  | 1392 | 2209 | <b>1800,5</b> |
| CD8B     | 0,708014 | NaN       | <b>0,708014</b>  | 1555 | NaN  | <b>1555</b>   |

|           |           |           |                  |      |      |               |
|-----------|-----------|-----------|------------------|------|------|---------------|
| CAMK2N1   | 0,624615  | 0,791848  | <b>0,7082315</b> | 1941 | 1978 | <b>1959,5</b> |
| P2RX2     | 1,281201  | 0,135386  | <b>0,7082935</b> | 974  | 1789 | <b>1381,5</b> |
| DKKL1     | 0,708322  | NaN       | <b>0,708322</b>  | 1585 | NaN  | <b>1585</b>   |
| SLC16A7   | 0,985509  | 0,431256  | <b>0,7083825</b> | 1764 | 2317 | <b>2040,5</b> |
| CCR6      | 0,708412  | NaN       | <b>0,708412</b>  | 2005 | NaN  | <b>2005</b>   |
| C15orf23  | 0,708682  | NaN       | <b>0,708682</b>  | 1239 | NaN  | <b>1239</b>   |
| ITPR1     | 0,81919   | 0,598273  | <b>0,7087315</b> | 1959 | 2279 | <b>2119</b>   |
| IL3RA     | 0,494082  | 0,923983  | <b>0,7090325</b> | 1652 | 2483 | <b>2067,5</b> |
| CREB3L4   | 0,470943  | 0,948122  | <b>0,7095325</b> | 874  | 1782 | <b>1328</b>   |
| OR1K1     | -0,328546 | 1,748762  | <b>0,710108</b>  | 1944 | 2371 | <b>2157,5</b> |
| ANKS4B    | 1,06248   | 0,358138  | <b>0,710309</b>  | 1751 | 1964 | <b>1857,5</b> |
| SPHKAP    | -0,414022 | 1,834969  | <b>0,7104735</b> | 1655 | 2078 | <b>1866,5</b> |
| GLCCI1    | 0,710671  | NaN       | <b>0,710671</b>  | 1604 | NaN  | <b>1604</b>   |
| ANGPT1    | 1,569197  | -0,147646 | <b>0,7107755</b> | 1539 | 1540 | <b>1539,5</b> |
| C6orf47   | 0,89272   | 0,529315  | <b>0,7110175</b> | 1297 | 1336 | <b>1316,5</b> |
| CPEB1     | 0,131476  | 1,290741  | <b>0,7111085</b> | 1555 | 2064 | <b>1809,5</b> |
| BIRC2     | 1,026619  | 0,395654  | <b>0,7111365</b> | 1360 | 2196 | <b>1778</b>   |
| PRPS2     | 1,429888  | -0,007455 | <b>0,7112165</b> | 1912 | 2296 | <b>2104</b>   |
| PPEF1     | 1,097948  | 0,325084  | <b>0,711516</b>  | 1616 | 2362 | <b>1989</b>   |
| C2CD4B    | 0,711725  | NaN       | <b>0,711725</b>  | 1960 | NaN  | <b>1960</b>   |
| NISCH     | 0,729815  | 0,693656  | <b>0,7117355</b> | 1453 | 1786 | <b>1619,5</b> |
| AKAP17A   | 1,579313  | -0,155596 | <b>0,7118585</b> | 1541 | 2231 | <b>1886</b>   |
| D4S234E   | 0,916126  | 0,507824  | <b>0,711975</b>  | 1502 | 2328 | <b>1915</b>   |
| PRKCH     | 0,294259  | 1,12974   | <b>0,7119995</b> | 1702 | 1791 | <b>1746,5</b> |
| IGF2BP1   | 0,252886  | 1,171216  | <b>0,712051</b>  | 1323 | 1355 | <b>1339</b>   |
| KRT27     | 0,645007  | 0,779296  | <b>0,7121515</b> | 1689 | 2062 | <b>1875,5</b> |
| FAM101B   | 1,395979  | 0,028448  | <b>0,7122135</b> | 1392 | 2166 | <b>1779</b>   |
| BCL2L1    | 0,94669   | 0,477887  | <b>0,7122885</b> | 1442 | 1858 | <b>1650</b>   |
| KRTAP11-1 | 1,023368  | 0,401596  | <b>0,712482</b>  | 1537 | 1990 | <b>1763,5</b> |
| WDR82     | 0,712613  | NaN       | <b>0,712613</b>  | 1600 | NaN  | <b>1600</b>   |
| GPC2      | 1,803078  | -0,377733 | <b>0,7126725</b> | 1789 | 2154 | <b>1971,5</b> |
| GRHL2     | 0,4385    | 0,987054  | <b>0,712777</b>  | 2020 | 2195 | <b>2107,5</b> |
| PCDHGA10  | 0,304972  | 1,120774  | <b>0,712873</b>  | 1463 | 2441 | <b>1952</b>   |
| PNPT1     | 0,272522  | 1,153761  | <b>0,7131415</b> | 1823 | 2211 | <b>2017</b>   |

|          |           |           |                  |      |      |               |
|----------|-----------|-----------|------------------|------|------|---------------|
| ARHGDI1  | 0,26997   | 1,156543  | <b>0,7132565</b> | 1621 | 1628 | <b>1624,5</b> |
| LPHN1    | 0,713286  | NaN       | <b>0,713286</b>  | 1935 | NaN  | <b>1935</b>   |
| HOOK1    | 0,484349  | 0,943185  | <b>0,713767</b>  | 1671 | 1478 | <b>1574,5</b> |
| IRF9     | 1,146889  | 0,281881  | <b>0,714385</b>  | 1515 | 1880 | <b>1697,5</b> |
| RASSF3   | 0,714848  | NaN       | <b>0,714848</b>  | 1901 | NaN  | <b>1901</b>   |
| TCEB3    | 0,267991  | 1,161762  | <b>0,7148765</b> | 818  | 1521 | <b>1169,5</b> |
| SST      | 1,466689  | -0,036102 | <b>0,7152935</b> | 1639 | 2123 | <b>1881</b>   |
| SNRPF    | 0,365789  | 1,065035  | <b>0,715412</b>  | 958  | 997  | <b>977,5</b>  |
| COLQ     | 0,590692  | 0,840413  | <b>0,7155525</b> | 1619 | 2115 | <b>1867</b>   |
| SEC11A   | 0,544475  | 0,887478  | <b>0,7159765</b> | 1344 | 2177 | <b>1760,5</b> |
| METTL7B  | 0,357265  | 1,074841  | <b>0,716053</b>  | 1976 | 2619 | <b>2297,5</b> |
| MRRF     | 0,884167  | 0,548373  | <b>0,71627</b>   | 1808 | 2349 | <b>2078,5</b> |
| KIAA1024 | 0,71645   | NaN       | <b>0,71645</b>   | 1523 | NaN  | <b>1523</b>   |
| MANBAL   | 0,860405  | 0,573075  | <b>0,71674</b>   | 2056 | 2438 | <b>2247</b>   |
| GAMT     | 1,636603  | -0,202972 | <b>0,7168155</b> | 1541 | 1951 | <b>1746</b>   |
| PLTP     | 0,983837  | 0,450125  | <b>0,716981</b>  | 1646 | 1814 | <b>1730</b>   |
| SEMA4B   | 0,599751  | 0,834506  | <b>0,7171285</b> | 1687 | 2237 | <b>1962</b>   |
| FECH     | 1,014875  | 0,419774  | <b>0,7173245</b> | 2141 | 3042 | <b>2591,5</b> |
| ZNF551   | 1,516635  | -0,081321 | <b>0,717657</b>  | 1794 | 2050 | <b>1922</b>   |
| CCDC127  | 0,718183  | NaN       | <b>0,718183</b>  | 1586 | NaN  | <b>1586</b>   |
| RNF208   | 1,153389  | 0,284056  | <b>0,7187225</b> | 1256 | 2427 | <b>1841,5</b> |
| FGF11    | -0,424656 | 1,86215   | <b>0,718747</b>  | 1730 | 2702 | <b>2216</b>   |
| METTL13  | 0,248268  | 1,189291  | <b>0,7187795</b> | 1510 | 2515 | <b>2012,5</b> |
| LRIF1    | 0,779776  | 0,658103  | <b>0,7189395</b> | 1802 | 2307 | <b>2054,5</b> |
| GLIPR1L1 | 0,274498  | 1,163622  | <b>0,71906</b>   | 1433 | 1971 | <b>1702</b>   |
| IL5RA    | NaN       | 0,719246  | <b>0,719246</b>  | NaN  | 2816 | <b>2816</b>   |
| TPMT     | 0,755764  | 0,683399  | <b>0,7195815</b> | 1807 | 1807 | <b>1807</b>   |
| SPDYA    | 0,719682  | NaN       | <b>0,719682</b>  | 1685 | NaN  | <b>1685</b>   |
| TUBGCP5  | 0,719721  | NaN       | <b>0,719721</b>  | 1586 | NaN  | <b>1586</b>   |
| COMMD2   | 0,719844  | NaN       | <b>0,719844</b>  | 1466 | NaN  | <b>1466</b>   |
| IFITM2   | 0,629671  | 0,810107  | <b>0,719889</b>  | 1745 | 2096 | <b>1920,5</b> |
| WIF1     | 1,177739  | 0,262047  | <b>0,719893</b>  | 1864 | 1820 | <b>1842</b>   |
| ZFYVE27  | 0,957894  | 0,48202   | <b>0,719957</b>  | 1759 | 2008 | <b>1883,5</b> |
| ZBTB1    | 0,795524  | 0,644478  | <b>0,720001</b>  | 1670 | 2055 | <b>1862,5</b> |

|          |           |           |                  |      |      |               |
|----------|-----------|-----------|------------------|------|------|---------------|
| MPP5     | 0,567435  | 0,872692  | <b>0,7200635</b> | 1610 | 2345 | <b>1977,5</b> |
| ATP11A   | 0,161919  | 1,278253  | <b>0,720086</b>  | 1468 | 1894 | <b>1681</b>   |
| FAM160B1 | 0,8672    | 0,572989  | <b>0,7200945</b> | 1384 | 1168 | <b>1276</b>   |
| CSPP1    | -0,012211 | 1,452562  | <b>0,7201755</b> | 1910 | 2721 | <b>2315,5</b> |
| ZNF184   | 0,720555  | NaN       | <b>0,720555</b>  | 1554 | NaN  | <b>1554</b>   |
| BBS7     | 0,560801  | 0,880478  | <b>0,7206395</b> | 1607 | 2229 | <b>1918</b>   |
| MMP14    | 0,58871   | 0,852774  | <b>0,720742</b>  | 2083 | 2628 | <b>2355,5</b> |
| KLF11    | 0,134543  | 1,307108  | <b>0,7208255</b> | 1268 | 2067 | <b>1667,5</b> |
| KHDRBS3  | 0,959739  | 0,481928  | <b>0,7208335</b> | 1722 | 2047 | <b>1884,5</b> |
| KRT82    | 0,724356  | 0,717754  | <b>0,721055</b>  | 1442 | 2254 | <b>1848</b>   |
| KCNG4    | 0,379722  | 1,06257   | <b>0,721146</b>  | 1792 | 2746 | <b>2269</b>   |
| KRT78    | 0,954584  | 0,488055  | <b>0,7213195</b> | 1364 | 1971 | <b>1667,5</b> |
| CCDC149  | 0,593245  | 0,849401  | <b>0,721323</b>  | 1740 | 1761 | <b>1750,5</b> |
| LHX1     | 0,07706   | 1,36564   | <b>0,72135</b>   | 2212 | 2295 | <b>2253,5</b> |
| EVC      | 0,721403  | NaN       | <b>0,721403</b>  | 1377 | NaN  | <b>1377</b>   |
| OBSL1    | 0,905181  | 0,539112  | <b>0,7221465</b> | 1401 | 2149 | <b>1775</b>   |
| GOLGA7   | 0,841757  | 0,602591  | <b>0,722174</b>  | 1554 | 3128 | <b>2341</b>   |
| TKTL1    | 0,087475  | 1,358286  | <b>0,7228805</b> | 1607 | 1449 | <b>1528</b>   |
| LTN1     | 0,810048  | 0,636658  | <b>0,723353</b>  | 1503 | 2315 | <b>1909</b>   |
| GGNBP2   | 0,474611  | 0,972136  | <b>0,7233735</b> | 1618 | 1981 | <b>1799,5</b> |
| PCSK4    | 1,048017  | 0,399198  | <b>0,7236075</b> | 1980 | 2163 | <b>2071,5</b> |
| CCDC114  | 0,983591  | 0,464092  | <b>0,7238415</b> | 2049 | 2214 | <b>2131,5</b> |
| CANT1    | 0,994052  | 0,454081  | <b>0,7240665</b> | 1437 | 2284 | <b>1860,5</b> |
| PLA2G1B  | 0,029885  | 1,418776  | <b>0,7243305</b> | 811  | 1474 | <b>1142,5</b> |
| CASP3    | 1,989052  | -0,540315 | <b>0,7243685</b> | 1673 | 2405 | <b>2039</b>   |
| ZNF608   | 1,150468  | 0,298324  | <b>0,724396</b>  | 1533 | 2124 | <b>1828,5</b> |
| C19orf12 | 0,523452  | 0,92586   | <b>0,724656</b>  | 1708 | 1747 | <b>1727,5</b> |
| MUDENG   | 0,724676  | NaN       | <b>0,724676</b>  | 1801 | NaN  | <b>1801</b>   |
| EDEM3    | 0,491047  | 0,958352  | <b>0,7246995</b> | 1397 | 1520 | <b>1458,5</b> |
| CNIH4    | 0,724791  | NaN       | <b>0,724791</b>  | 1775 | NaN  | <b>1775</b>   |
| SCG2     | -0,756405 | 2,206793  | <b>0,725194</b>  | 1915 | 1891 | <b>1903</b>   |
| SPATS2   | 1,215563  | 0,23564   | <b>0,7256015</b> | 2103 | 2109 | <b>2106</b>   |
| GNB1     | 1,641053  | -0,1897   | <b>0,7256765</b> | 1129 | 1868 | <b>1498,5</b> |
| TXNRD2   | 0,986705  | 0,464731  | <b>0,725718</b>  | 1617 | 2097 | <b>1857</b>   |

|          |           |           |                  |      |      |               |
|----------|-----------|-----------|------------------|------|------|---------------|
| DYRK2    | 0,183803  | 1,26805   | <b>0,7259265</b> | 1808 | 2169 | <b>1988,5</b> |
| CD14     | NaN       | 0,72594   | <b>0,72594</b>   | NaN  | 1980 | <b>1980</b>   |
| ADCK3    | 0,102779  | 1,349135  | <b>0,725957</b>  | 1845 | 1928 | <b>1886,5</b> |
| RAP1GDS1 | -0,091864 | 1,543936  | <b>0,726036</b>  | 1411 | 2123 | <b>1767</b>   |
| CLDN4    | 1,297521  | 0,154604  | <b>0,7260625</b> | 1286 | 2238 | <b>1762</b>   |
| LEPROTL1 | 0,958803  | 0,493593  | <b>0,726198</b>  | 2041 | 1843 | <b>1942</b>   |
| GPAA1    | 1,345433  | 0,107593  | <b>0,726513</b>  | 1748 | 1850 | <b>1799</b>   |
| TRPV5    | 0,435789  | 1,017589  | <b>0,726689</b>  | 2030 | 2706 | <b>2368</b>   |
| C13orf35 | 0,618776  | 0,834621  | <b>0,7266985</b> | 1984 | 2226 | <b>2105</b>   |
| MON1A    | 0,405208  | 1,048684  | <b>0,726946</b>  | 1499 | 2270 | <b>1884,5</b> |
| NCALD    | 0,727263  | NaN       | <b>0,727263</b>  | 1632 | NaN  | <b>1632</b>   |
| GLE1     | 0,498337  | 0,956746  | <b>0,7275415</b> | 1268 | 1797 | <b>1532,5</b> |
| C9orf116 | 0,955446  | 0,499695  | <b>0,7275705</b> | 1629 | 1951 | <b>1790</b>   |
| PLAC1    | 0,727696  | NaN       | <b>0,727696</b>  | 1529 | NaN  | <b>1529</b>   |
| PSMD10   | 0,239062  | 1,216544  | <b>0,727803</b>  | 1940 | 2644 | <b>2292</b>   |
| STAG2    | 1,28258   | 0,173534  | <b>0,728057</b>  | 1799 | 2131 | <b>1965</b>   |
| TGM1     | 0,736543  | 0,720754  | <b>0,7286485</b> | 1977 | 3094 | <b>2535,5</b> |
| PTGES    | 1,020869  | 0,436565  | <b>0,728717</b>  | 849  | 1638 | <b>1243,5</b> |
| USP53    | -0,234076 | 1,692134  | <b>0,729029</b>  | 1846 | 2081 | <b>1963,5</b> |
| PCDP1    | 0,882987  | 0,575951  | <b>0,729469</b>  | 2067 | 2534 | <b>2300,5</b> |
| GCM1     | 0,725584  | 0,733439  | <b>0,7295115</b> | 1948 | 1908 | <b>1928</b>   |
| ESRRB    | 0,374124  | 1,084978  | <b>0,729551</b>  | 1577 | 2373 | <b>1975</b>   |
| CNOT6L   | 0,508113  | 0,951886  | <b>0,7299995</b> | 1463 | 1832 | <b>1647,5</b> |
| KDR      | 0,896617  | 0,563691  | <b>0,730154</b>  | 1836 | 2365 | <b>2100,5</b> |
| DPAGT1   | 0,676199  | 0,784717  | <b>0,730458</b>  | 797  | 1906 | <b>1351,5</b> |
| CAND1    | 0,922269  | 0,538665  | <b>0,730467</b>  | 710  | 1785 | <b>1247,5</b> |
| TPBG     | 0,666677  | 0,794886  | <b>0,7307815</b> | 1309 | 1510 | <b>1409,5</b> |
| OSBPL2   | 0,731027  | NaN       | <b>0,731027</b>  | 1572 | NaN  | <b>1572</b>   |
| SSTR4    | 0,731334  | NaN       | <b>0,731334</b>  | 1443 | NaN  | <b>1443</b>   |
| EBF2     | 1,202666  | 0,260659  | <b>0,7316625</b> | 1657 | 2282 | <b>1969,5</b> |
| PLXNA2   | 1,638428  | -0,174963 | <b>0,7317325</b> | 1220 | 2072 | <b>1646</b>   |
| EPGN     | 1,186939  | 0,277287  | <b>0,732113</b>  | 1673 | 2729 | <b>2201</b>   |
| TDRD5    | 0,732157  | NaN       | <b>0,732157</b>  | 1294 | NaN  | <b>1294</b>   |
| GSR      | 1,335448  | 0,128891  | <b>0,7321695</b> | 1781 | 1967 | <b>1874</b>   |

|           |          |           |                  |      |      |               |
|-----------|----------|-----------|------------------|------|------|---------------|
| ACD       | 1,139075 | 0,32561   | <b>0,7323425</b> | 1500 | 1930 | <b>1715</b>   |
| PPP1R7    | 1,325975 | 0,138919  | <b>0,732447</b>  | 1707 | 2426 | <b>2066,5</b> |
| CYB5R2    | NaN      | 0,732883  | <b>0,732883</b>  | NaN  | 2865 | <b>2865</b>   |
| SGCB      | 0,732973 | NaN       | <b>0,732973</b>  | 1938 | NaN  | <b>1938</b>   |
| IK        | 1,134924 | 0,33193   | <b>0,733427</b>  | 718  | 866  | <b>792</b>    |
| DOK6      | 1,255924 | 0,210952  | <b>0,733438</b>  | 1669 | 2110 | <b>1889,5</b> |
| LINS      | 0,733521 | NaN       | <b>0,733521</b>  | 1601 | NaN  | <b>1601</b>   |
| ITGB1     | 0,365009 | 1,102844  | <b>0,7339265</b> | 1193 | 1836 | <b>1514,5</b> |
| ECT2      | 0,957809 | 0,510939  | <b>0,734374</b>  | 814  | 1176 | <b>995</b>    |
| SFSWAP    | 0,337374 | 1,131556  | <b>0,734465</b>  | 1702 | 2137 | <b>1919,5</b> |
| SPAG17    | 0,735254 | NaN       | <b>0,735254</b>  | 1716 | NaN  | <b>1716</b>   |
| SEC61A1   | 0,735319 | NaN       | <b>0,735319</b>  | 1657 | NaN  | <b>1657</b>   |
| APOL4     | 1,029065 | 0,441601  | <b>0,735333</b>  | 1736 | 1952 | <b>1844</b>   |
| ATP6V0E1  | NaN      | 0,735366  | <b>0,735366</b>  | NaN  | 2685 | <b>2685</b>   |
| MOG       | 0,735466 | NaN       | <b>0,735466</b>  | 1354 | NaN  | <b>1354</b>   |
| ST6GAL1   | 0,989491 | 0,481478  | <b>0,7354845</b> | 1850 | 1949 | <b>1899,5</b> |
| SLC26A7   | 0,67803  | 0,793343  | <b>0,7356865</b> | 2000 | 2517 | <b>2258,5</b> |
| C2orf43   | 0,730535 | 0,742338  | <b>0,7364365</b> | 1836 | 2856 | <b>2346</b>   |
| RPS28     | 0,736565 | NaN       | <b>0,736565</b>  | 737  | NaN  | <b>737</b>    |
| GABRA4    | 1,01968  | 0,453859  | <b>0,7367695</b> | 2296 | 2733 | <b>2514,5</b> |
| C14orf119 | 1,745578 | -0,271852 | <b>0,736863</b>  | 1675 | 1890 | <b>1782,5</b> |
| DCAF5     | 0,404376 | 1,069944  | <b>0,73716</b>   | 1739 | 1898 | <b>1818,5</b> |
| C9orf128  | 0,737308 | NaN       | <b>0,737308</b>  | 1506 | NaN  | <b>1506</b>   |
| USP29     | 0,493472 | 0,981676  | <b>0,737574</b>  | 1853 | 2075 | <b>1964</b>   |
| OR13C4    | 0,651864 | 0,823363  | <b>0,7376135</b> | 1511 | 1733 | <b>1622</b>   |
| SYTL2     | 0,761946 | 0,713524  | <b>0,737735</b>  | 1782 | 2477 | <b>2129,5</b> |
| HORMAD2   | 0,361284 | 1,114982  | <b>0,738133</b>  | 1481 | 2430 | <b>1955,5</b> |
| LRRN4     | 0,738384 | NaN       | <b>0,738384</b>  | 1241 | NaN  | <b>1241</b>   |
| NXNL2     | 0,790951 | 0,685848  | <b>0,7383995</b> | 2318 | 2634 | <b>2476</b>   |
| PHKG1     | 2,016794 | -0,539588 | <b>0,738603</b>  | 1770 | 2070 | <b>1920</b>   |
| ZNF274    | 1,548876 | -0,071625 | <b>0,7386255</b> | 1842 | 2186 | <b>2014</b>   |
| FNBP1L    | 0,738699 | NaN       | <b>0,738699</b>  | 1629 | NaN  | <b>1629</b>   |
| PDE1A     | 0,651626 | 0,826105  | <b>0,7388655</b> | 1438 | 1620 | <b>1529</b>   |
| NR2C2     | 0,47276  | 1,005005  | <b>0,7388825</b> | 1497 | 1989 | <b>1743</b>   |



|          |           |           |                  |      |      |               |
|----------|-----------|-----------|------------------|------|------|---------------|
| DYNC1I1  | 0,728527  | 0,749608  | <b>0,7390675</b> | 1433 | 1794 | <b>1613,5</b> |
| ABCF3    | 0,942483  | 0,536186  | <b>0,7393345</b> | 1437 | 2136 | <b>1786,5</b> |
| SHPRH    | 1,792157  | -0,313407 | <b>0,739375</b>  | 1850 | 2952 | <b>2401</b>   |
| PAK3     | 1,315813  | 0,163006  | <b>0,7394095</b> | 1903 | 2450 | <b>2176,5</b> |
| C15orf54 | 0,388506  | 1,091938  | <b>0,740222</b>  | 2093 | 1656 | <b>1874,5</b> |
| EIF1AY   | 1,123158  | 0,357634  | <b>0,740396</b>  | 1811 | 2798 | <b>2304,5</b> |
| RUFY4    | -0,093247 | 1,574301  | <b>0,740527</b>  | 1914 | 2166 | <b>2040</b>   |
| BCMO1    | 0,744292  | 0,737108  | <b>0,7407</b>    | 1448 | 1971 | <b>1709,5</b> |
| GLT25D2  | 0,740733  | NaN       | <b>0,740733</b>  | 1806 | NaN  | <b>1806</b>   |
| CD101    | 1,682701  | -0,201131 | <b>0,740785</b>  | 1855 | 1869 | <b>1862</b>   |
| FBF1     | 1,455297  | 0,026965  | <b>0,741131</b>  | 1279 | 1896 | <b>1587,5</b> |
| OR10Q1   | 0,741187  | NaN       | <b>0,741187</b>  | 1785 | NaN  | <b>1785</b>   |
| ARMCS    | 0,741365  | NaN       | <b>0,741365</b>  | 1432 | NaN  | <b>1432</b>   |
| ZNF230   | 0,300614  | 1,183527  | <b>0,7420705</b> | 1706 | 2024 | <b>1865</b>   |
| NETO2    | 0,742201  | NaN       | <b>0,742201</b>  | 1911 | NaN  | <b>1911</b>   |
| XRN2     | 0,887675  | 0,59689   | <b>0,7422825</b> | 1790 | 2082 | <b>1936</b>   |
| DYSF     | 1,400675  | 0,08417   | <b>0,7424225</b> | 1889 | 2615 | <b>2252</b>   |
| TREML1   | -0,152983 | 1,638565  | <b>0,742791</b>  | 1318 | 1187 | <b>1252,5</b> |
| CEACAM8  | 0,572637  | 0,913088  | <b>0,7428625</b> | 1946 | 1622 | <b>1784</b>   |
| KCTD12   | -0,723591 | 2,209568  | <b>0,7429885</b> | 1255 | 1998 | <b>1626,5</b> |
| MEP1B    | 0,835832  | 0,650148  | <b>0,74299</b>   | 2124 | 2256 | <b>2190</b>   |
| FERMT1   | 0,969213  | 0,517079  | <b>0,743146</b>  | 1157 | 1906 | <b>1531,5</b> |
| SLC35A4  | 1,804523  | -0,317499 | <b>0,743512</b>  | 1503 | 2176 | <b>1839,5</b> |
| C6orf89  | 0,743542  | NaN       | <b>0,743542</b>  | 1255 | NaN  | <b>1255</b>   |
| SSPO     | 0,412506  | 1,074805  | <b>0,7436555</b> | 1849 | 2734 | <b>2291,5</b> |
| GML      | 0,996385  | 0,491074  | <b>0,7437295</b> | 1333 | 1704 | <b>1518,5</b> |
| GLYR1    | 0,744407  | NaN       | <b>0,744407</b>  | 1405 | NaN  | <b>1405</b>   |
| CNOT2    | 1,040421  | 0,449138  | <b>0,7447795</b> | 1705 | 2092 | <b>1898,5</b> |
| KLHDC10  | 0,744891  | NaN       | <b>0,744891</b>  | 1687 | NaN  | <b>1687</b>   |
| SLC17A1  | 0,880206  | 0,610089  | <b>0,7451475</b> | 1569 | 1849 | <b>1709</b>   |
| ETFDH    | 1,053676  | 0,43668   | <b>0,745178</b>  | 1905 | 2189 | <b>2047</b>   |
| TSGA13   | 1,328233  | 0,162776  | <b>0,7455045</b> | 1463 | 1953 | <b>1708</b>   |
| WRNIP1   | -0,118116 | 1,609943  | <b>0,7459135</b> | 1352 | 2068 | <b>1710</b>   |
| GADL1    | 0,16735   | 1,324694  | <b>0,746022</b>  | 1535 | 1849 | <b>1692</b>   |

|           |          |          |                  |      |      |               |
|-----------|----------|----------|------------------|------|------|---------------|
| SORCS3    | 0,74629  | NaN      | <b>0,74629</b>   | 1516 | NaN  | <b>1516</b>   |
| C4orf21   | 0,746682 | NaN      | <b>0,746682</b>  | 735  | NaN  | <b>735</b>    |
| HIST1H2BO | 0,535838 | 0,957977 | <b>0,7469075</b> | 528  | 958  | <b>743</b>    |
| TSPAN10   | 0,747235 | NaN      | <b>0,747235</b>  | 2025 | NaN  | <b>2025</b>   |
| PPFIA4    | 0,497909 | 0,996594 | <b>0,7472515</b> | 1729 | 2107 | <b>1918</b>   |
| FNBP4     | 0,122581 | 1,373268 | <b>0,7479245</b> | 1501 | 2145 | <b>1823</b>   |
| TCP11L1   | 1,048772 | 0,448431 | <b>0,7486015</b> | 1855 | 2516 | <b>2185,5</b> |
| MRPS21    | 0,675309 | 0,822465 | <b>0,748887</b>  | 1199 | 2005 | <b>1602</b>   |
| FRRS1     | 0,749046 | NaN      | <b>0,749046</b>  | 1622 | NaN  | <b>1622</b>   |
| CR2       | 0,768132 | 0,730412 | <b>0,749272</b>  | 1854 | 2427 | <b>2140,5</b> |
| PPP6R1    | 0,749451 | NaN      | <b>0,749451</b>  | 1749 | NaN  | <b>1749</b>   |
| GUCA2A    | 0,135722 | 1,363491 | <b>0,7496065</b> | 1292 | 1729 | <b>1510,5</b> |
| DDHD2     | 0,715335 | 0,784236 | <b>0,7497855</b> | 1610 | 1985 | <b>1797,5</b> |
| C6orf118  | 0,747344 | 0,752803 | <b>0,7500735</b> | 1930 | 1895 | <b>1912,5</b> |
| FOXN4     | 0,750244 | NaN      | <b>0,750244</b>  | 1066 | NaN  | <b>1066</b>   |
| SLC12A2   | 0,71979  | 0,780794 | <b>0,750292</b>  | 1434 | 2040 | <b>1737</b>   |
| HDAC3     | 0,552367 | 0,949655 | <b>0,751011</b>  | 1411 | 2250 | <b>1830,5</b> |
| P4HB      | 0,431248 | 1,071008 | <b>0,751128</b>  | 1638 | 2089 | <b>1863,5</b> |
| GABRR3    | 1,131502 | 0,371445 | <b>0,7514735</b> | 1649 | 2020 | <b>1834,5</b> |
| PLEC      | 0,751475 | NaN      | <b>0,751475</b>  | 1566 | NaN  | <b>1566</b>   |
| SHANK2    | 0,956378 | 0,546898 | <b>0,751638</b>  | 1496 | 2206 | <b>1851</b>   |
| COX18     | 0,70494  | 0,798662 | <b>0,751801</b>  | 1511 | 1818 | <b>1664,5</b> |
| UXT       | 1,056941 | 0,446719 | <b>0,75183</b>   | 1394 | 2229 | <b>1811,5</b> |
| PCP4      | 0,752097 | NaN      | <b>0,752097</b>  | 1009 | NaN  | <b>1009</b>   |
| FZD5      | 0,75219  | NaN      | <b>0,75219</b>   | 1420 | NaN  | <b>1420</b>   |
| SLC38A9   | 0,173064 | 1,331391 | <b>0,7522275</b> | 2273 | 2281 | <b>2277</b>   |
| MTHFD2    | 1,50288  | 0,00162  | <b>0,75225</b>   | 1452 | 2070 | <b>1761</b>   |
| ELFN2     | 1,591206 | -0,08657 | <b>0,752318</b>  | 1889 | 1943 | <b>1916</b>   |
| DEFA5     | 0,254373 | 1,250528 | <b>0,7524505</b> | 2070 | 2426 | <b>2248</b>   |
| ZNF189    | 0,752575 | NaN      | <b>0,752575</b>  | 1436 | NaN  | <b>1436</b>   |
| SAP130    | 1,289384 | 0,216715 | <b>0,7530495</b> | 1887 | 2674 | <b>2280,5</b> |
| TBX1      | 1,474017 | 0,033267 | <b>0,753642</b>  | 1824 | 2437 | <b>2130,5</b> |
| FNDC7     | 0,753727 | NaN      | <b>0,753727</b>  | 1210 | NaN  | <b>1210</b>   |
| ERN1      | 0,89807  | 0,60943  | <b>0,75375</b>   | 1668 | 2078 | <b>1873</b>   |

|          |           |           |                  |      |      |               |
|----------|-----------|-----------|------------------|------|------|---------------|
| DDX24    | 1,280422  | 0,227095  | <b>0,7537585</b> | 1139 | 1675 | <b>1407</b>   |
| ASH2L    | 1,069931  | 0,437955  | <b>0,753943</b>  | 1662 | 1911 | <b>1786,5</b> |
| C3orf36  | 0,753954  | NaN       | <b>0,753954</b>  | 1160 | NaN  | <b>1160</b>   |
| CD3D     | 0,093753  | 1,415137  | <b>0,754445</b>  | 1732 | 2705 | <b>2218,5</b> |
| NCOA3    | 0,762287  | 0,746928  | <b>0,7546075</b> | 1497 | 1715 | <b>1606</b>   |
| HPCAL4   | 0,561225  | 0,948359  | <b>0,754792</b>  | 1862 | 1824 | <b>1843</b>   |
| TSPYL2   | 0,731665  | 0,77811   | <b>0,7548875</b> | 1438 | 1973 | <b>1705,5</b> |
| APOBEC3H | 0,755468  | NaN       | <b>0,755468</b>  | 1876 | NaN  | <b>1876</b>   |
| KIAA1522 | 1,455989  | 0,055252  | <b>0,7556205</b> | 1436 | 2077 | <b>1756,5</b> |
| RUFY3    | 0,756016  | NaN       | <b>0,756016</b>  | 1573 | NaN  | <b>1573</b>   |
| ERCC1    | -0,123442 | 1,63647   | <b>0,756514</b>  | 1029 | 1558 | <b>1293,5</b> |
| SPPL2B   | 1,543399  | -0,029448 | <b>0,7569755</b> | 1793 | 1263 | <b>1528</b>   |
| TMPRSS15 | 1,321591  | 0,192494  | <b>0,7570425</b> | 2083 | 2330 | <b>2206,5</b> |
| RFXANK   | 1,000281  | 0,513928  | <b>0,7571045</b> | 1301 | 1137 | <b>1219</b>   |
| TLR6     | 0,51246   | 1,002294  | <b>0,757377</b>  | 2235 | 2321 | <b>2278</b>   |
| GFM1     | 0,608397  | 0,906866  | <b>0,7576315</b> | 1318 | 1967 | <b>1642,5</b> |
| SLURP1   | 0,557296  | 0,95808   | <b>0,757688</b>  | 1076 | 1851 | <b>1463,5</b> |
| LIPJ     | 0,906595  | 0,608977  | <b>0,757786</b>  | 1921 | 2586 | <b>2253,5</b> |
| COX4I1   | 1,164477  | 0,352171  | <b>0,758324</b>  | 1538 | 1964 | <b>1751</b>   |
| KCNS3    | 0,033766  | 1,482955  | <b>0,7583605</b> | 1326 | 1793 | <b>1559,5</b> |
| NRD1     | 1,863981  | -0,347178 | <b>0,7584015</b> | 1810 | 1876 | <b>1843</b>   |
| HEY2     | -0,613637 | 2,130866  | <b>0,7586145</b> | 1552 | 3083 | <b>2317,5</b> |
| ERGIC1   | 0,581802  | 0,935981  | <b>0,7588915</b> | 1484 | 2404 | <b>1944</b>   |
| TMC7     | 1,598533  | -0,080333 | <b>0,7591</b>    | 1506 | 2173 | <b>1839,5</b> |
| GTF2H5   | 1,583593  | -0,065173 | <b>0,75921</b>   | 1674 | 2961 | <b>2317,5</b> |
| CARD16   | 0,97162   | 0,546833  | <b>0,7592265</b> | 2015 | 3091 | <b>2553</b>   |
| ASF1A    | 0,681185  | 0,837589  | <b>0,759387</b>  | 1228 | 1794 | <b>1511</b>   |
| GTPBP8   | 0,775378  | 0,743452  | <b>0,759415</b>  | 1619 | 1908 | <b>1763,5</b> |
| PLCB4    | 0,751155  | 0,767954  | <b>0,7595545</b> | 1135 | 2518 | <b>1826,5</b> |
| PPP1CA   | 0,879563  | 0,639977  | <b>0,75977</b>   | 1186 | 1804 | <b>1495</b>   |
| ZMYND11  | 0,23208   | 1,288025  | <b>0,7600525</b> | 2316 | 2642 | <b>2479</b>   |
| PXMP4    | 0,760257  | NaN       | <b>0,760257</b>  | 1546 | NaN  | <b>1546</b>   |
| ASNSD1   | 1,395277  | 0,125758  | <b>0,7605175</b> | 1549 | 1680 | <b>1614,5</b> |
| CD164L2  | 0,632021  | 0,889647  | <b>0,760834</b>  | 1718 | 2306 | <b>2012</b>   |

|          |           |           |                  |      |      |               |
|----------|-----------|-----------|------------------|------|------|---------------|
| ODF2L    | 0,760966  | NaN       | <b>0,760966</b>  | 1507 | NaN  | <b>1507</b>   |
| C1orf64  | 0,642608  | 0,879659  | <b>0,7611335</b> | 1867 | 2492 | <b>2179,5</b> |
| C17orf62 | 0,761293  | NaN       | <b>0,761293</b>  | 1535 | NaN  | <b>1535</b>   |
| PRKRA    | 0,761431  | NaN       | <b>0,761431</b>  | 1761 | NaN  | <b>1761</b>   |
| SLC9B2   | 1,149949  | 0,373276  | <b>0,7616125</b> | 1685 | 1861 | <b>1773</b>   |
| SLC4A8   | 1,524603  | -0,001014 | <b>0,7617945</b> | 1486 | 1387 | <b>1436,5</b> |
| FAM154A  | 1,275052  | 0,248875  | <b>0,7619635</b> | 1336 | 1364 | <b>1350</b>   |
| BTBD2    | 1,516122  | 0,008811  | <b>0,7624665</b> | 1703 | 2661 | <b>2182</b>   |
| FER      | 1,149876  | 0,375247  | <b>0,7625615</b> | 1910 | 1888 | <b>1899</b>   |
| EXD1     | -0,253276 | 1,7785    | <b>0,762612</b>  | 1649 | 1875 | <b>1762</b>   |
| SLC4A1AP | 2,118308  | -0,592991 | <b>0,7626585</b> | 1448 | 1926 | <b>1687</b>   |
| TMCO3    | 0,581492  | 0,943835  | <b>0,7626635</b> | 1669 | 2001 | <b>1835</b>   |
| PDIK1L   | 0,349022  | 1,176772  | <b>0,762897</b>  | 1770 | 1914 | <b>1842</b>   |
| MINX1    | 0,44838   | 1,077672  | <b>0,763026</b>  | 1214 | 1519 | <b>1366,5</b> |
| ATP9A    | 1,053757  | 0,473286  | <b>0,7635215</b> | 2112 | 2055 | <b>2083,5</b> |
| PLLP     | 0,880698  | 0,646583  | <b>0,7636405</b> | 1644 | 2088 | <b>1866</b>   |
| CLCN5    | 1,216688  | 0,310691  | <b>0,7636895</b> | 1925 | 2554 | <b>2239,5</b> |
| PILRB    | 0,763962  | NaN       | <b>0,763962</b>  | 2117 | NaN  | <b>2117</b>   |
| MORN1    | 1,408319  | 0,119763  | <b>0,764041</b>  | 1524 | 2117 | <b>1820,5</b> |
| TAS2R4   | 0,924192  | 0,603941  | <b>0,7640665</b> | 1640 | 2245 | <b>1942,5</b> |
| TMEM95   | 0,764447  | NaN       | <b>0,764447</b>  | 1760 | NaN  | <b>1760</b>   |
| FAM204A  | 1,11367   | 0,415355  | <b>0,7645125</b> | 591  | 1391 | <b>991</b>    |
| ABCG2    | 0,74567   | 0,783416  | <b>0,764543</b>  | 1700 | 1976 | <b>1838</b>   |
| SPATA2L  | 0,764567  | NaN       | <b>0,764567</b>  | 1440 | NaN  | <b>1440</b>   |
| WFDC11   | -0,135402 | 1,664697  | <b>0,7646475</b> | 1123 | 2059 | <b>1591</b>   |
| LHX2     | 0,192754  | 1,336809  | <b>0,7647815</b> | 1767 | 1499 | <b>1633</b>   |
| TICAM1   | 0,765117  | NaN       | <b>0,765117</b>  | 1395 | NaN  | <b>1395</b>   |
| PPIL2    | -0,035413 | 1,565946  | <b>0,7652665</b> | 1612 | 2578 | <b>2095</b>   |
| COL8A2   | 0,941169  | 0,589807  | <b>0,765488</b>  | 1453 | 1570 | <b>1511,5</b> |
| ENTPD7   | 0,974237  | 0,557072  | <b>0,7656545</b> | 1457 | 1805 | <b>1631</b>   |
| CHCHD3   | 1,346763  | 0,185011  | <b>0,765887</b>  | 1573 | 2257 | <b>1915</b>   |
| SLC5A5   | 1,015399  | 0,517097  | <b>0,766248</b>  | 1502 | 1809 | <b>1655,5</b> |
| RGS8     | 1,210809  | 0,322653  | <b>0,766731</b>  | 1893 | 2024 | <b>1958,5</b> |
| GPR98    | 0,766824  | NaN       | <b>0,766824</b>  | 1954 | NaN  | <b>1954</b>   |

|           |           |          |                  |      |      |               |
|-----------|-----------|----------|------------------|------|------|---------------|
| ENPP2     | 1,816551  | -0,28256 | <b>0,7669955</b> | 1430 | 1585 | <b>1507,5</b> |
| KIRREL3   | 0,767026  | NaN      | <b>0,767026</b>  | 1542 | NaN  | <b>1542</b>   |
| FCHSD1    | -1,037181 | 2,57248  | <b>0,7676495</b> | 1582 | 1985 | <b>1783,5</b> |
| C14orf180 | 0,678912  | 0,856803 | <b>0,7678575</b> | 1724 | 2558 | <b>2141</b>   |
| C1orf115  | 1,175216  | 0,361049 | <b>0,7681325</b> | 1397 | 1708 | <b>1552,5</b> |
| SNTB1     | 1,168016  | 0,368653 | <b>0,7683345</b> | 1843 | 2237 | <b>2040</b>   |
| OXCT1     | -0,274311 | 1,8113   | <b>0,7684945</b> | 1416 | 1716 | <b>1566</b>   |
| GRIA2     | 0,761937  | 0,7751   | <b>0,7685185</b> | 1654 | 1992 | <b>1823</b>   |
| KIAA1967  | 1,520321  | 0,017017 | <b>0,768669</b>  | 1579 | 1960 | <b>1769,5</b> |
| RIOK2     | 0,618389  | 0,91907  | <b>0,7687295</b> | 1958 | 2114 | <b>2036</b>   |
| TRIM2     | 0,980521  | 0,557164 | <b>0,7688425</b> | 1375 | 2698 | <b>2036,5</b> |
| RPH3A     | 0,768931  | NaN      | <b>0,768931</b>  | 1483 | NaN  | <b>1483</b>   |
| REG4      | 0,878958  | 0,65976  | <b>0,769359</b>  | 1636 | 2237 | <b>1936,5</b> |
| SYNRG     | 1,135398  | 0,404588 | <b>0,769993</b>  | 1923 | 1909 | <b>1916</b>   |
| SESTD1    | 1,181453  | 0,358717 | <b>0,770085</b>  | 1833 | 1833 | <b>1833</b>   |
| LRRC39    | 0,829012  | 0,711462 | <b>0,770237</b>  | 1859 | 2142 | <b>2000,5</b> |
| SUN2      | 0,568498  | 0,972513 | <b>0,7705055</b> | 1547 | 1992 | <b>1769,5</b> |
| SEC24B    | 1,246456  | 0,29464  | <b>0,770548</b>  | 1599 | 2540 | <b>2069,5</b> |
| CXorf57   | 0,77075   | NaN      | <b>0,77075</b>   | 1303 | NaN  | <b>1303</b>   |
| PTP4A3    | 1,007513  | 0,534287 | <b>0,7709</b>    | 1797 | 2218 | <b>2007,5</b> |
| CDC20B    | 0,749483  | 0,792481 | <b>0,770982</b>  | 1400 | 1962 | <b>1681</b>   |
| ZNF232    | 0,771194  | NaN      | <b>0,771194</b>  | 1499 | NaN  | <b>1499</b>   |
| TMC1      | -0,092999 | 1,635587 | <b>0,771294</b>  | 1670 | 2536 | <b>2103</b>   |
| DUSP23    | 1,080279  | 0,462822 | <b>0,7715505</b> | 1122 | 1633 | <b>1377,5</b> |
| RAB22A    | NaN       | 0,771581 | <b>0,771581</b>  | NaN  | 2865 | <b>2865</b>   |
| CHRNA4    | 0,569803  | 0,973979 | <b>0,771891</b>  | 1870 | 3059 | <b>2464,5</b> |
| ARR3      | 0,870042  | 0,673766 | <b>0,771904</b>  | 1798 | 2152 | <b>1975</b>   |
| RGS12     | 0,441691  | 1,103252 | <b>0,7724715</b> | 1594 | 1315 | <b>1454,5</b> |
| PHIP      | 0,538852  | 1,006203 | <b>0,7725275</b> | 1994 | 1788 | <b>1891</b>   |
| PARP6     | 0,311932  | 1,233516 | <b>0,772724</b>  | 997  | 1119 | <b>1058</b>   |
| SNRPD1    | 0,990692  | 0,555391 | <b>0,7730415</b> | 953  | 1345 | <b>1149</b>   |
| NKX2-5    | NaN       | 0,773369 | <b>0,773369</b>  | NaN  | 1552 | <b>1552</b>   |
| L2HGDH    | 0,553964  | 0,993106 | <b>0,773535</b>  | 1310 | 1791 | <b>1550,5</b> |
| HAPLN4    | 0,773698  | NaN      | <b>0,773698</b>  | 1786 | NaN  | <b>1786</b>   |

|            |           |           |                  |      |      |               |
|------------|-----------|-----------|------------------|------|------|---------------|
| RIMKLB     | 0,00326   | 1,5442    | <b>0,77373</b>   | 2111 | 2231 | <b>2171</b>   |
| LIG1       | -0,061593 | 1,609429  | <b>0,773918</b>  | 1264 | 1951 | <b>1607,5</b> |
| ATG4B      | 0,466521  | 1,08146   | <b>0,7739905</b> | 980  | 1852 | <b>1416</b>   |
| MAP7D2     | 0,774122  | NaN       | <b>0,774122</b>  | 1422 | NaN  | <b>1422</b>   |
| ZNF574     | 0,996497  | 0,553875  | <b>0,775186</b>  | 1697 | 2209 | <b>1953</b>   |
| DHODH      | 0,200629  | 1,350196  | <b>0,7754125</b> | 1497 | 1581 | <b>1539</b>   |
| OR2F2      | 0,232804  | 1,318418  | <b>0,775611</b>  | 1839 | 2217 | <b>2028</b>   |
| DCAF8L1    | 0,323746  | 1,227742  | <b>0,775744</b>  | 1966 | 2065 | <b>2015,5</b> |
| OR4C16     | 0,788194  | 0,763714  | <b>0,775954</b>  | 1746 | 1702 | <b>1724</b>   |
| EPDR1      | 1,271804  | 0,281054  | <b>0,776429</b>  | 784  | 1672 | <b>1228</b>   |
| CASC3      | 0,776482  | NaN       | <b>0,776482</b>  | 1707 | NaN  | <b>1707</b>   |
| IL15RA     | 1,251415  | 0,301747  | <b>0,776581</b>  | 1632 | 2127 | <b>1879,5</b> |
| EIF1       | 1,909858  | -0,356313 | <b>0,7767725</b> | 1524 | 2366 | <b>1945</b>   |
| DDR GK1    | 0,776882  | NaN       | <b>0,776882</b>  | 1627 | NaN  | <b>1627</b>   |
| NELL1      | 0,315308  | 1,23978   | <b>0,777544</b>  | 1618 | 2326 | <b>1972</b>   |
| KCTD3      | 0,925066  | 0,630926  | <b>0,777996</b>  | 1431 | 2011 | <b>1721</b>   |
| ZFP106     | 1,043753  | 0,513134  | <b>0,7784435</b> | 1662 | 1660 | <b>1661</b>   |
| LINGO2     | 0,778495  | NaN       | <b>0,778495</b>  | 1647 | NaN  | <b>1647</b>   |
| ZBED4      | 0,588666  | 0,968344  | <b>0,778505</b>  | 1844 | 2383 | <b>2113,5</b> |
| BAG1       | 1,763228  | -0,205506 | <b>0,778861</b>  | 1388 | 1827 | <b>1607,5</b> |
| SF3A1      | 0,778895  | NaN       | <b>0,778895</b>  | 892  | NaN  | <b>892</b>    |
| AHR        | 0,843794  | 0,71478   | <b>0,779287</b>  | 1640 | 2253 | <b>1946,5</b> |
| CSGALNACT2 | 1,467097  | 0,091626  | <b>0,7793615</b> | 1927 | 2291 | <b>2109</b>   |
| AK3        | 0,312838  | 1,245949  | <b>0,7793935</b> | 1878 | 2503 | <b>2190,5</b> |
| ZHX2       | NaN       | 0,779446  | <b>0,779446</b>  | NaN  | 1892 | <b>1892</b>   |
| SPATA20    | 1,210726  | 0,348239  | <b>0,7794825</b> | 1635 | 2195 | <b>1915</b>   |
| UQCRFS1    | 0,500969  | 1,059191  | <b>0,78008</b>   | 1786 | 2923 | <b>2354,5</b> |
| C13orf16   | 1,282396  | 0,278369  | <b>0,7803825</b> | 1804 | 2271 | <b>2037,5</b> |
| UBE2B      | 0,687192  | 0,873727  | <b>0,7804595</b> | 1948 | 2966 | <b>2457</b>   |
| APEX2      | -0,182129 | 1,744048  | <b>0,7809595</b> | 1476 | 1970 | <b>1723</b>   |
| NOS2       | 0,806723  | 0,755238  | <b>0,7809805</b> | 1766 | 2068 | <b>1917</b>   |
| OLFM1      | 0,803995  | 0,75813   | <b>0,7810625</b> | 1914 | 2278 | <b>2096</b>   |
| FPGS       | 0,195311  | 1,366873  | <b>0,781092</b>  | 1376 | 1819 | <b>1597,5</b> |
| ANKRD40    | 0,575177  | 0,987092  | <b>0,7811345</b> | 1590 | 1376 | <b>1483</b>   |

|         |           |          |                  |      |      |               |
|---------|-----------|----------|------------------|------|------|---------------|
| FUBP3   | 0,837037  | 0,72529  | <b>0,7811635</b> | 1451 | 1719 | <b>1585</b>   |
| ZNF394  | 0,374856  | 1,1875   | <b>0,781178</b>  | 1675 | 2047 | <b>1861</b>   |
| SNRPD3  | 0,348778  | 1,213705 | <b>0,7812415</b> | 733  | 937  | <b>835</b>    |
| MRPS12  | 1,370803  | 0,191859 | <b>0,781331</b>  | 1884 | 1955 | <b>1919,5</b> |
| SEC11C  | 1,511564  | 0,051184 | <b>0,781374</b>  | 2498 | 2468 | <b>2483</b>   |
| NLRP10  | 0,775673  | 0,787633 | <b>0,781653</b>  | 1362 | 1855 | <b>1608,5</b> |
| S100A10 | 1,231065  | 0,333278 | <b>0,7821715</b> | 1037 | 1789 | <b>1413</b>   |
| BTNL2   | 0,782339  | NaN      | <b>0,782339</b>  | 1724 | NaN  | <b>1724</b>   |
| SDR16C5 | 0,835436  | 0,729244 | <b>0,78234</b>   | 1721 | 1871 | <b>1796</b>   |
| FSD1L   | 0,618953  | 0,946128 | <b>0,7825405</b> | 1638 | 2465 | <b>2051,5</b> |
| SUOX    | 0,731519  | 0,833708 | <b>0,7826135</b> | 979  | 2126 | <b>1552,5</b> |
| ZNF586  | 0,782714  | NaN      | <b>0,782714</b>  | 1663 | NaN  | <b>1663</b>   |
| ALK     | 0,625905  | 0,940077 | <b>0,782991</b>  | 1706 | 2074 | <b>1890</b>   |
| EML3    | 0,783023  | NaN      | <b>0,783023</b>  | 1628 | NaN  | <b>1628</b>   |
| ZNF415  | 0,78334   | NaN      | <b>0,78334</b>   | 1482 | NaN  | <b>1482</b>   |
| CCDC101 | 0,78334   | NaN      | <b>0,78334</b>   | 1814 | NaN  | <b>1814</b>   |
| GPNUMB  | 0,783457  | NaN      | <b>0,783457</b>  | 2081 | NaN  | <b>2081</b>   |
| CCDC42  | 0,783487  | NaN      | <b>0,783487</b>  | 1591 | NaN  | <b>1591</b>   |
| MRPS18B | 0,679829  | 0,887268 | <b>0,7835485</b> | 1396 | 2604 | <b>2000</b>   |
| CSDC2   | 0,78388   | NaN      | <b>0,78388</b>   | 1902 | NaN  | <b>1902</b>   |
| PPYR1   | 0,78402   | NaN      | <b>0,78402</b>   | 2058 | NaN  | <b>2058</b>   |
| LPPR3   | 0,784034  | NaN      | <b>0,784034</b>  | 1457 | NaN  | <b>1457</b>   |
| RAB39   | 0,7844    | NaN      | <b>0,7844</b>    | 1355 | NaN  | <b>1355</b>   |
| IGF2BP3 | 0,784419  | NaN      | <b>0,784419</b>  | 1783 | NaN  | <b>1783</b>   |
| KANK1   | 1,030737  | 0,539325 | <b>0,785031</b>  | 1533 | 1367 | <b>1450</b>   |
| GNB3    | 0,240021  | 1,330475 | <b>0,785248</b>  | 1586 | 2062 | <b>1824</b>   |
| MAGEB1  | 0,785322  | NaN      | <b>0,785322</b>  | 1410 | NaN  | <b>1410</b>   |
| ADSL    | 0,24861   | 1,322858 | <b>0,785734</b>  | 1469 | 1805 | <b>1637</b>   |
| MYPN    | 0,560606  | 1,012226 | <b>0,786416</b>  | 1880 | 2366 | <b>2123</b>   |
| CASP4   | 0,854191  | 0,718941 | <b>0,786566</b>  | 2070 | 1925 | <b>1997,5</b> |
| C7orf70 | 0,16171   | 1,412683 | <b>0,7871965</b> | 1551 | 1675 | <b>1613</b>   |
| DVL1    | 0,787457  | NaN      | <b>0,787457</b>  | 1379 | NaN  | <b>1379</b>   |
| AMELY   | -0,108706 | 1,684689 | <b>0,7879915</b> | 840  | 1134 | <b>987</b>    |
| SIRT5   | 0,282189  | 1,293885 | <b>0,788037</b>  | 1358 | 2152 | <b>1755</b>   |

|          |           |           |                  |      |      |               |
|----------|-----------|-----------|------------------|------|------|---------------|
| C18orf62 | 0,426369  | 1,149944  | <b>0,7881565</b> | 1736 | 1859 | <b>1797,5</b> |
| CCDC104  | 0,419193  | 1,158222  | <b>0,7887075</b> | 1170 | 1581 | <b>1375,5</b> |
| LILRA4   | 0,789114  | NaN       | <b>0,789114</b>  | 1976 | NaN  | <b>1976</b>   |
| OTUB2    | 0,893514  | 0,685303  | <b>0,7894085</b> | 1101 | 1745 | <b>1423</b>   |
| IL20     | 0,789455  | NaN       | <b>0,789455</b>  | 2214 | NaN  | <b>2214</b>   |
| GBAS     | 1,362106  | 0,218028  | <b>0,790067</b>  | 1717 | 2405 | <b>2061</b>   |
| OR5D14   | 0,962126  | 0,618607  | <b>0,7903665</b> | 1338 | 1247 | <b>1292,5</b> |
| OR2L13   | 0,536345  | 1,044859  | <b>0,790602</b>  | 1422 | 1754 | <b>1588</b>   |
| EZH2     | 0,548809  | 1,03241   | <b>0,7906095</b> | 1349 | 2223 | <b>1786</b>   |
| TRIM47   | 0,888912  | 0,694322  | <b>0,791617</b>  | 1438 | 2323 | <b>1880,5</b> |
| CD300LG  | 0,791643  | NaN       | <b>0,791643</b>  | 1695 | NaN  | <b>1695</b>   |
| CACNA1A  | 1,323211  | 0,260121  | <b>0,791666</b>  | 1912 | 2674 | <b>2293</b>   |
| NES      | 0,758469  | 0,825617  | <b>0,792043</b>  | 2230 | 2513 | <b>2371,5</b> |
| GRM6     | 0,792682  | NaN       | <b>0,792682</b>  | 1748 | NaN  | <b>1748</b>   |
| 01-mars  | 0,541581  | 1,044205  | <b>0,792893</b>  | 2031 | 2828 | <b>2429,5</b> |
| C4orf42  | 1,56085   | 0,025277  | <b>0,7930635</b> | 1559 | 2002 | <b>1780,5</b> |
| ZFYVE9   | -0,148044 | 1,734825  | <b>0,7933905</b> | 917  | 1843 | <b>1380</b>   |
| MBLAC1   | 0,793445  | NaN       | <b>0,793445</b>  | 1641 | NaN  | <b>1641</b>   |
| S1PR5    | 0,793504  | NaN       | <b>0,793504</b>  | 1806 | NaN  | <b>1806</b>   |
| RBBP6    | 0,921371  | 0,666687  | <b>0,794029</b>  | 1845 | 2743 | <b>2294</b>   |
| GTF3A    | 1,222624  | 0,366279  | <b>0,7944515</b> | 1335 | 2260 | <b>1797,5</b> |
| NPRL3    | 0,619946  | 0,969107  | <b>0,7945265</b> | 1986 | 2289 | <b>2137,5</b> |
| PIGN     | 0,991242  | 0,598068  | <b>0,794655</b>  | 1497 | 2790 | <b>2143,5</b> |
| VANGL1   | 0,721389  | 0,868663  | <b>0,795026</b>  | 1844 | 2660 | <b>2252</b>   |
| RHOBTB2  | -0,667565 | 2,257783  | <b>0,795109</b>  | 1343 | 1700 | <b>1521,5</b> |
| ALDH1A1  | NaN       | 0,79519   | <b>0,79519</b>   | NaN  | 2577 | <b>2577</b>   |
| OR6C1    | 0,934027  | 0,657204  | <b>0,7956155</b> | 1994 | 2177 | <b>2085,5</b> |
| PTF1A    | 0,463642  | 1,128608  | <b>0,796125</b>  | 1585 | 1741 | <b>1663</b>   |
| C11orf80 | 0,796713  | NaN       | <b>0,796713</b>  | 1651 | NaN  | <b>1651</b>   |
| PC       | 1,598738  | -0,005011 | <b>0,7968635</b> | 2008 | 2196 | <b>2102</b>   |
| C7orf59  | 0,79687   | NaN       | <b>0,79687</b>   | 1806 | NaN  | <b>1806</b>   |
| DDX41    | 0,418061  | 1,175698  | <b>0,7968795</b> | 1069 | 1652 | <b>1360,5</b> |
| HEATR3   | 0,797139  | NaN       | <b>0,797139</b>  | 1650 | NaN  | <b>1650</b>   |
| EYA1     | 1,722316  | -0,127394 | <b>0,797461</b>  | 1925 | 2206 | <b>2065,5</b> |



|           |           |           |                  |      |      |               |
|-----------|-----------|-----------|------------------|------|------|---------------|
| WDR35     | 1,066713  | 0,528257  | <b>0,797485</b>  | 1568 | 1801 | <b>1684,5</b> |
| DNAJC16   | 0,389012  | 1,206335  | <b>0,7976735</b> | 1923 | 2908 | <b>2415,5</b> |
| LMO3      | 0,711971  | 0,883569  | <b>0,79777</b>   | 1890 | 1788 | <b>1839</b>   |
| FAM53C    | 0,484299  | 1,111623  | <b>0,797961</b>  | 1584 | 2414 | <b>1999</b>   |
| CEP55     | 0,761947  | 0,834312  | <b>0,7981295</b> | 1397 | 2485 | <b>1941</b>   |
| KIAA1244  | 1,065272  | 0,53258   | <b>0,798926</b>  | 1863 | 2099 | <b>1981</b>   |
| CCDC138   | 0,798968  | NaN       | <b>0,798968</b>  | 2015 | NaN  | <b>2015</b>   |
| PRCP      | 1,453804  | 0,144787  | <b>0,7992955</b> | 1672 | 1619 | <b>1645,5</b> |
| DCDC1     | 0,821382  | 0,777914  | <b>0,799648</b>  | 1410 | 2062 | <b>1736</b>   |
| UNC5D     | 0,847261  | 0,752174  | <b>0,7997175</b> | 1609 | 1659 | <b>1634</b>   |
| RNF216    | 0,750624  | 0,84904   | <b>0,799832</b>  | 1873 | 2687 | <b>2280</b>   |
| ATP13A3   | 1,507768  | 0,092391  | <b>0,8000795</b> | 1793 | 2155 | <b>1974</b>   |
| NXT2      | 1,031408  | 0,569126  | <b>0,800267</b>  | 1681 | 2179 | <b>1930</b>   |
| FCHO2     | 0,800493  | NaN       | <b>0,800493</b>  | 1798 | NaN  | <b>1798</b>   |
| MPEG1     | 1,209177  | 0,392169  | <b>0,800673</b>  | 1722 | 2473 | <b>2097,5</b> |
| NPPB      | 0,783857  | 0,817773  | <b>0,800815</b>  | 1905 | 2138 | <b>2021,5</b> |
| EFHD2     | 1,611032  | -0,009267 | <b>0,8008825</b> | 1663 | 2097 | <b>1880</b>   |
| MAMSTR    | 0,972856  | 0,629363  | <b>0,8011095</b> | 1498 | 2257 | <b>1877,5</b> |
| C15orf24  | 1,498961  | 0,103556  | <b>0,8012585</b> | 1414 | 2003 | <b>1708,5</b> |
| CCDC165   | 0,666824  | 0,935895  | <b>0,8013595</b> | 829  | 1692 | <b>1260,5</b> |
| CDK13     | 1,501103  | 0,10255   | <b>0,8018265</b> | 1557 | 1645 | <b>1601</b>   |
| LEPREL1   | 0,669827  | 0,934719  | <b>0,802273</b>  | 1365 | 2225 | <b>1795</b>   |
| PTPN5     | 0,429389  | 1,175959  | <b>0,802674</b>  | 1552 | 1925 | <b>1738,5</b> |
| CGRRF1    | 0,262437  | 1,343228  | <b>0,8028325</b> | 1586 | 2056 | <b>1821</b>   |
| KIAA0319L | 0,101482  | 1,504193  | <b>0,8028375</b> | 1790 | 1913 | <b>1851,5</b> |
| CTDNEP1   | 0,802928  | NaN       | <b>0,802928</b>  | 1787 | NaN  | <b>1787</b>   |
| POLE3     | -1,053115 | 2,659971  | <b>0,803428</b>  | 1876 | 1962 | <b>1919</b>   |
| EPC1      | 0,63655   | 0,970522  | <b>0,803536</b>  | 1395 | 1738 | <b>1566,5</b> |
| CCDC28B   | 0,804     | NaN       | <b>0,804</b>     | 1949 | NaN  | <b>1949</b>   |
| DUSP10    | 0,921293  | 0,686736  | <b>0,8040145</b> | 1331 | 2022 | <b>1676,5</b> |
| CALHM2    | 0,804145  | NaN       | <b>0,804145</b>  | 1478 | NaN  | <b>1478</b>   |
| SLC4A10   | 1,088733  | 0,520044  | <b>0,8043885</b> | 2103 | 2387 | <b>2245</b>   |
| NAV2      | 0,804416  | NaN       | <b>0,804416</b>  | 1557 | NaN  | <b>1557</b>   |
| PYDC2     | 0,736084  | 0,873541  | <b>0,8048125</b> | 1293 | 1612 | <b>1452,5</b> |

|          |           |           |                  |      |      |               |
|----------|-----------|-----------|------------------|------|------|---------------|
| CSRP3    | 0,805533  | NaN       | <b>0,805533</b>  | 1170 | NaN  | <b>1170</b>   |
| POLDIP3  | 0,805858  | NaN       | <b>0,805858</b>  | 1877 | NaN  | <b>1877</b>   |
| CWC15    | 0,805867  | NaN       | <b>0,805867</b>  | 960  | NaN  | <b>960</b>    |
| APOLD1   | 0,953185  | 0,658673  | <b>0,805929</b>  | 1332 | 1251 | <b>1291,5</b> |
| IRX1     | 0,805971  | NaN       | <b>0,805971</b>  | 1145 | NaN  | <b>1145</b>   |
| C22orf26 | 0,148285  | 1,463662  | <b>0,8059735</b> | 1652 | 2460 | <b>2056</b>   |
| KBTBD8   | 0,941037  | 0,671489  | <b>0,806263</b>  | 1587 | 2673 | <b>2130</b>   |
| PPP1R3C  | 0,707221  | 0,905394  | <b>0,8063075</b> | 1902 | 2596 | <b>2249</b>   |
| RAB27B   | 0,790885  | 0,822536  | <b>0,8067105</b> | 1173 | 1499 | <b>1336</b>   |
| MESP2    | 0,194339  | 1,420466  | <b>0,8074025</b> | 1737 | 2099 | <b>1918</b>   |
| XAGE5    | 0,807453  | NaN       | <b>0,807453</b>  | 1616 | NaN  | <b>1616</b>   |
| USP42    | 0,601078  | 1,013945  | <b>0,8075115</b> | 1672 | 1732 | <b>1702</b>   |
| NCAPD3   | -0,341667 | 1,956887  | <b>0,80761</b>   | 1814 | 2406 | <b>2110</b>   |
| CORO6    | 0,807724  | NaN       | <b>0,807724</b>  | 1960 | NaN  | <b>1960</b>   |
| ZNF577   | 0,80773   | NaN       | <b>0,80773</b>   | 1564 | NaN  | <b>1564</b>   |
| FAM207A  | 1,787721  | -0,171784 | <b>0,8079685</b> | 1327 | 2263 | <b>1795</b>   |
| ZSCAN23  | 1,072664  | 0,543631  | <b>0,8081475</b> | 1734 | 1523 | <b>1628,5</b> |
| ATP6V1G3 | 0,795576  | 0,821308  | <b>0,808442</b>  | 1632 | 1583 | <b>1607,5</b> |
| MAP3K7   | 0,167645  | 1,449294  | <b>0,8084695</b> | 1918 | 2047 | <b>1982,5</b> |
| AP1B1    | 1,231603  | 0,385659  | <b>0,808631</b>  | 1490 | 2866 | <b>2178</b>   |
| FAM151B  | -0,365799 | 1,983699  | <b>0,80895</b>   | 1420 | 1929 | <b>1674,5</b> |
| TBL1X    | 1,012353  | 0,606361  | <b>0,809357</b>  | 1592 | 1914 | <b>1753</b>   |
| ANO9     | 1,7276    | -0,108436 | <b>0,809582</b>  | 1536 | 2229 | <b>1882,5</b> |
| DGCR2    | 1,272489  | 0,346755  | <b>0,809622</b>  | 1558 | 1826 | <b>1692</b>   |
| POLE2    | 0,219789  | 1,400118  | <b>0,8099535</b> | 1680 | 1803 | <b>1741,5</b> |
| PVRL4    | 1,217015  | 0,403306  | <b>0,8101605</b> | 1282 | 1971 | <b>1626,5</b> |
| FAM181A  | 0,987647  | 0,63306   | <b>0,8103535</b> | 1874 | 2223 | <b>2048,5</b> |
| C7orf47  | 0,929311  | 0,69211   | <b>0,8107105</b> | 1302 | 1186 | <b>1244</b>   |
| ERMN     | 0,860844  | 0,760809  | <b>0,8108265</b> | 1543 | 2169 | <b>1856</b>   |
| SLC9A7   | -0,174563 | 1,796801  | <b>0,811119</b>  | 1567 | 2180 | <b>1873,5</b> |
| HCG9     | 1,062955  | 0,559486  | <b>0,8112205</b> | 1580 | 1723 | <b>1651,5</b> |
| PROS1    | 1,172035  | 0,450494  | <b>0,8112645</b> | 1352 | 2729 | <b>2040,5</b> |
| SYT10    | 0,811543  | NaN       | <b>0,811543</b>  | 1736 | NaN  | <b>1736</b>   |
| TCHP     | 0,608571  | 1,014667  | <b>0,811619</b>  | 1441 | 2266 | <b>1853,5</b> |

|           |           |           |                  |      |      |               |
|-----------|-----------|-----------|------------------|------|------|---------------|
| PLCXD1    | 0,82439   | 0,79976   | <b>0,812075</b>  | 1769 | 1827 | <b>1798</b>   |
| BRIP1     | 1,724954  | -0,10077  | <b>0,812092</b>  | 2277 | 2096 | <b>2186,5</b> |
| CYP4Z1    | 0,334485  | 1,289807  | <b>0,812146</b>  | 1960 | 2486 | <b>2223</b>   |
| TERF2IP   | 0,374706  | 1,24974   | <b>0,812223</b>  | 1935 | 1238 | <b>1586,5</b> |
| RPA1      | 0,404779  | 1,219695  | <b>0,812237</b>  | 1060 | 1527 | <b>1293,5</b> |
| FAM53B    | 0,73412   | 0,891584  | <b>0,812852</b>  | 1327 | 1964 | <b>1645,5</b> |
| RAX       | 1,318977  | 0,307202  | <b>0,8130895</b> | 1211 | 2158 | <b>1684,5</b> |
| KLHL12    | 0,81326   | NaN       | <b>0,81326</b>   | 1615 | NaN  | <b>1615</b>   |
| NDUFA4    | 0,514424  | 1,112527  | <b>0,8134755</b> | 1941 | 2217 | <b>2079</b>   |
| ZNF257    | 0,813519  | NaN       | <b>0,813519</b>  | 1391 | NaN  | <b>1391</b>   |
| GATA1     | 0,365537  | 1,26216   | <b>0,8138485</b> | 1382 | 1769 | <b>1575,5</b> |
| ENO3      | NaN       | 0,814102  | <b>0,814102</b>  | NaN  | 2712 | <b>2712</b>   |
| PDE1C     | 1,786076  | -0,157729 | <b>0,8141735</b> | 1685 | 1977 | <b>1831</b>   |
| LYRM4     | 0,814372  | NaN       | <b>0,814372</b>  | 1532 | NaN  | <b>1532</b>   |
| ARID5B    | 2,38044   | -0,751662 | <b>0,814389</b>  | 1526 | 2022 | <b>1774</b>   |
| C7orf43   | 0,81441   | NaN       | <b>0,81441</b>   | 2046 | NaN  | <b>2046</b>   |
| RFX7      | 0,569379  | 1,059825  | <b>0,814602</b>  | 1779 | 3060 | <b>2419,5</b> |
| PHF20     | 1,157661  | 0,4716    | <b>0,8146305</b> | 1536 | 2944 | <b>2240</b>   |
| CCDC158   | 0,814855  | NaN       | <b>0,814855</b>  | 2318 | NaN  | <b>2318</b>   |
| EMID1     | 0,814965  | NaN       | <b>0,814965</b>  | 1606 | NaN  | <b>1606</b>   |
| SPC24     | 0,635557  | 0,994645  | <b>0,815101</b>  | 1191 | 1613 | <b>1402</b>   |
| KRTAP19-3 | 0,805038  | 0,825456  | <b>0,815247</b>  | 1854 | 1929 | <b>1891,5</b> |
| WIPF3     | -1,342614 | 2,973676  | <b>0,815531</b>  | 1589 | 2286 | <b>1937,5</b> |
| RERE      | 0,650815  | 0,980282  | <b>0,8155485</b> | 1718 | 2251 | <b>1984,5</b> |
| CENPF     | 0,815681  | NaN       | <b>0,815681</b>  | 2048 | NaN  | <b>2048</b>   |
| RBM22     | 0,98012   | 0,651529  | <b>0,8158245</b> | 1532 | 1282 | <b>1407</b>   |
| WNT10B    | 0,975053  | 0,656953  | <b>0,816003</b>  | 1275 | 1846 | <b>1560,5</b> |
| LTB       | 1,578264  | 0,05446   | <b>0,816362</b>  | 1955 | 1782 | <b>1868,5</b> |
| DDX50     | 1,379679  | 0,254003  | <b>0,816841</b>  | 1032 | 1331 | <b>1181,5</b> |
| MECOM     | 0,816847  | NaN       | <b>0,816847</b>  | 1907 | NaN  | <b>1907</b>   |
| B3GNTL1   | 0,770695  | 0,863246  | <b>0,8169705</b> | 1328 | 1619 | <b>1473,5</b> |
| SPANXN5   | 0,817215  | NaN       | <b>0,817215</b>  | 1821 | NaN  | <b>1821</b>   |
| CANX      | 1,345187  | 0,289678  | <b>0,8174325</b> | 1624 | 1815 | <b>1719,5</b> |
| TLL1      | 1,11784   | 0,517152  | <b>0,817496</b>  | 1931 | 2102 | <b>2016,5</b> |

|         |          |           |                  |      |      |               |
|---------|----------|-----------|------------------|------|------|---------------|
| HIC2    | 0,060201 | 1,574968  | <b>0,8175845</b> | 1457 | 2961 | <b>2209</b>   |
| TMEM182 | 0,493418 | 1,142136  | <b>0,817777</b>  | 1945 | 2912 | <b>2428,5</b> |
| GJD4    | 1,283968 | 0,352225  | <b>0,8180965</b> | 1990 | 2025 | <b>2007,5</b> |
| PLA2G4D | 1,004936 | 0,631805  | <b>0,8183705</b> | 1398 | 2021 | <b>1709,5</b> |
| CARD9   | 1,066319 | 0,570682  | <b>0,8185005</b> | 1488 | 2572 | <b>2030</b>   |
| EXD3    | 0,549505 | 1,087721  | <b>0,818613</b>  | 1655 | 2459 | <b>2057</b>   |
| POPDC2  | 0,818701 | NaN       | <b>0,818701</b>  | 1526 | NaN  | <b>1526</b>   |
| INPP5J  | 1,108568 | 0,529279  | <b>0,8189235</b> | 1147 | 2110 | <b>1628,5</b> |
| AGT     | 1,131116 | 0,506774  | <b>0,818945</b>  | 1508 | 1663 | <b>1585,5</b> |
| OR5D13  | 0,90946  | 0,729153  | <b>0,8193065</b> | 1579 | 1564 | <b>1571,5</b> |
| MS4A15  | 0,938339 | 0,700298  | <b>0,8193185</b> | 1281 | 1799 | <b>1540</b>   |
| CCDC11  | 0,819705 | NaN       | <b>0,819705</b>  | 2031 | NaN  | <b>2031</b>   |
| ZNF107  | 0,819949 | NaN       | <b>0,819949</b>  | 1785 | NaN  | <b>1785</b>   |
| ZNF638  | 0,851783 | 0,788506  | <b>0,8201445</b> | 1382 | 1729 | <b>1555,5</b> |
| BNIP1   | 1,375926 | 0,265658  | <b>0,820792</b>  | 1758 | 2158 | <b>1958</b>   |
| DENR    | 1,093576 | 0,548312  | <b>0,820944</b>  | 1747 | 2198 | <b>1972,5</b> |
| USP1    | 0,904661 | 0,737637  | <b>0,821149</b>  | 847  | 2149 | <b>1498</b>   |
| MAPRE1  | 0,82152  | NaN       | <b>0,82152</b>   | 1743 | NaN  | <b>1743</b>   |
| MAD2L1  | 0,553589 | 1,089742  | <b>0,8216655</b> | 1303 | 1447 | <b>1375</b>   |
| EPHA7   | 0,6381   | 1,005429  | <b>0,8217645</b> | 2056 | 2263 | <b>2159,5</b> |
| B4GALT6 | NaN      | 0,822693  | <b>0,822693</b>  | NaN  | 3033 | <b>3033</b>   |
| THSD4   | 0,583595 | 1,062095  | <b>0,822845</b>  | 1244 | 1442 | <b>1343</b>   |
| KLHL15  | 0,309225 | 1,336534  | <b>0,8228795</b> | 1804 | 2593 | <b>2198,5</b> |
| VN1R5   | 0,82324  | NaN       | <b>0,82324</b>   | 1938 | NaN  | <b>1938</b>   |
| GPHB5   | 0,880955 | 0,766396  | <b>0,8236755</b> | 2112 | 2502 | <b>2307</b>   |
| CCNL2   | 0,823883 | NaN       | <b>0,823883</b>  | 1293 | NaN  | <b>1293</b>   |
| REEP5   | 1,271222 | 0,377297  | <b>0,8242595</b> | 1847 | 1385 | <b>1616</b>   |
| SLC15A3 | 1,027914 | 0,620733  | <b>0,8243235</b> | 1675 | 2032 | <b>1853,5</b> |
| FAIM3   | 1,738506 | -0,08976  | <b>0,824373</b>  | 1757 | 2233 | <b>1995</b>   |
| SLC30A8 | 1,712698 | -0,063801 | <b>0,8244485</b> | 1085 | 1829 | <b>1457</b>   |
| PNISR   | 1,200504 | 0,449074  | <b>0,824789</b>  | 1862 | 2264 | <b>2063</b>   |
| SORBS2  | 0,824931 | NaN       | <b>0,824931</b>  | 1930 | NaN  | <b>1930</b>   |
| BBS9    | 1,451808 | 0,198325  | <b>0,8250665</b> | 1542 | 1971 | <b>1756,5</b> |
| GAB4    | 1,151325 | 0,500192  | <b>0,8257585</b> | 1509 | 1694 | <b>1601,5</b> |

|          |           |           |                  |      |      |               |
|----------|-----------|-----------|------------------|------|------|---------------|
| TMEM229B | 1,115914  | 0,53612   | <b>0,826017</b>  | 1699 | 2346 | <b>2022,5</b> |
| ECM1     | -0,014366 | 1,666949  | <b>0,8262915</b> | 1269 | 1954 | <b>1611,5</b> |
| STARD6   | 0,826442  | NaN       | <b>0,826442</b>  | 1696 | NaN  | <b>1696</b>   |
| CRISPLD2 | 0,030018  | 1,622896  | <b>0,826457</b>  | 1790 | 1322 | <b>1556</b>   |
| SMOX     | NaN       | 0,826473  | <b>0,826473</b>  | NaN  | 2390 | <b>2390</b>   |
| SYT12    | 1,589546  | 0,064113  | <b>0,8268295</b> | 1378 | 2374 | <b>1876</b>   |
| TMEFF2   | 1,076839  | 0,577154  | <b>0,8269965</b> | 1833 | 2061 | <b>1947</b>   |
| LCE3D    | 1,211497  | 0,44287   | <b>0,8271835</b> | 1090 | 1320 | <b>1205</b>   |
| F11      | 1,867718  | -0,213136 | <b>0,827291</b>  | 1671 | 2190 | <b>1930,5</b> |
| OXA1L    | 1,058863  | 0,595813  | <b>0,827338</b>  | 1716 | 1950 | <b>1833</b>   |
| PSG7     | 1,109738  | 0,545557  | <b>0,8276475</b> | 1499 | 1968 | <b>1733,5</b> |
| PRR16    | 1,580037  | 0,077828  | <b>0,8289325</b> | 1499 | 2315 | <b>1907</b>   |
| RAI2     | 0,770372  | 0,887563  | <b>0,8289675</b> | 1319 | 1685 | <b>1502</b>   |
| RNF128   | 1,434351  | 0,225274  | <b>0,8298125</b> | 1790 | 2431 | <b>2110,5</b> |
| DYRK3    | 0,629261  | 1,030491  | <b>0,829876</b>  | 1957 | 1842 | <b>1899,5</b> |
| MYO9B    | 2,174172  | -0,513667 | <b>0,8302525</b> | 1736 | 1387 | <b>1561,5</b> |
| CDK10    | 1,017256  | 0,6436    | <b>0,830428</b>  | 1109 | 1550 | <b>1329,5</b> |
| RFT1     | 0,209809  | 1,452119  | <b>0,830964</b>  | 1314 | 1888 | <b>1601</b>   |
| ZNF362   | 1,028979  | 0,633615  | <b>0,831297</b>  | 1672 | 1940 | <b>1806</b>   |
| ALDOC    | 0,746835  | 0,915937  | <b>0,831386</b>  | 1851 | 3397 | <b>2624</b>   |
| SLC25A2  | 0,924049  | 0,739332  | <b>0,8316905</b> | 1597 | 2632 | <b>2114,5</b> |
| PCDHA4   | 0,939187  | 0,72459   | <b>0,8318885</b> | 1900 | 2514 | <b>2207</b>   |
| CCDC150  | 0,462968  | 1,200845  | <b>0,8319065</b> | 1735 | 2303 | <b>2019</b>   |
| RBMXL2   | 0,831936  | NaN       | <b>0,831936</b>  | 1745 | NaN  | <b>1745</b>   |
| FNDC8    | 0,832063  | NaN       | <b>0,832063</b>  | 1295 | NaN  | <b>1295</b>   |
| DHDDS    | 0,729383  | 0,934808  | <b>0,8320955</b> | 1539 | 2689 | <b>2114</b>   |
| RHOH     | 1,098268  | 0,566199  | <b>0,8322335</b> | 1897 | 2601 | <b>2249</b>   |
| RABEPK   | 0,677887  | 0,986726  | <b>0,8323065</b> | 2039 | 1767 | <b>1903</b>   |
| unknown  | 1,283857  | 0,381225  | <b>0,832541</b>  | 2128 | 2245 | <b>2186,5</b> |
| ZMYM5    | 0,284457  | 1,380675  | <b>0,832566</b>  | 1731 | 1976 | <b>1853,5</b> |
| ZNF653   | 0,268456  | 1,397504  | <b>0,83298</b>   | 1884 | 2760 | <b>2322</b>   |
| CALCB    | 0,791726  | 0,874618  | <b>0,833172</b>  | 1659 | 2348 | <b>2003,5</b> |
| AMIGO2   | 1,739813  | -0,073308 | <b>0,8332525</b> | 1005 | 2327 | <b>1666</b>   |
| MKI67    | 0,833896  | NaN       | <b>0,833896</b>  | 1555 | NaN  | <b>1555</b>   |

|          |           |          |                  |      |      |               |
|----------|-----------|----------|------------------|------|------|---------------|
| NLRP5    | 0,633064  | 1,034783 | <b>0,8339235</b> | 1606 | 1948 | <b>1777</b>   |
| SPRY2    | 0,826962  | 0,841828 | <b>0,834395</b>  | 2350 | 2087 | <b>2218,5</b> |
| GRN      | 0,860172  | 0,808636 | <b>0,834404</b>  | 945  | 1675 | <b>1310</b>   |
| VAMP2    | 0,747726  | 0,921637 | <b>0,8346815</b> | 2068 | 1715 | <b>1891,5</b> |
| UBE2Z    | 1,304168  | 0,366211 | <b>0,8351895</b> | 2041 | 2613 | <b>2327</b>   |
| CD79A    | 0,545967  | 1,124864 | <b>0,8354155</b> | 1486 | 1859 | <b>1672,5</b> |
| RNF213   | 0,156513  | 1,514533 | <b>0,835523</b>  | 1686 | 2131 | <b>1908,5</b> |
| VPS37C   | 0,910643  | 0,761385 | <b>0,836014</b>  | 1749 | 1551 | <b>1650</b>   |
| SEMA6D   | 0,233607  | 1,439649 | <b>0,836628</b>  | 1492 | 1850 | <b>1671</b>   |
| FGD1     | 1,144305  | 0,529399 | <b>0,836852</b>  | 1420 | 2186 | <b>1803</b>   |
| ECEL1    | 0,634172  | 1,039915 | <b>0,8370435</b> | 1464 | 1611 | <b>1537,5</b> |
| PDHA1    | 0,546153  | 1,128375 | <b>0,837264</b>  | 2139 | 2001 | <b>2070</b>   |
| PSMA2    | 1,607394  | 0,06765  | <b>0,837522</b>  | 428  | 1252 | <b>840</b>    |
| KCNA10   | 0,40162   | 1,273785 | <b>0,8377025</b> | 2270 | 2909 | <b>2589,5</b> |
| OR10AG1  | 0,531552  | 1,146501 | <b>0,8390265</b> | 1614 | 2001 | <b>1807,5</b> |
| FAM98A   | 1,198792  | 0,479308 | <b>0,83905</b>   | 1659 | 2845 | <b>2252</b>   |
| RHOBTB1  | -0,129565 | 1,808064 | <b>0,8392495</b> | 1389 | 1527 | <b>1458</b>   |
| FUNDC1   | 1,329288  | 0,349476 | <b>0,839382</b>  | 1764 | 2661 | <b>2212,5</b> |
| FMO1     | 0,901722  | 0,777072 | <b>0,839397</b>  | 1796 | 2382 | <b>2089</b>   |
| LEP      | 1,294176  | 0,387307 | <b>0,8407415</b> | 1429 | 2078 | <b>1753,5</b> |
| TSPYL6   | 0,634943  | 1,046574 | <b>0,8407585</b> | 1356 | 2235 | <b>1795,5</b> |
| LRR1     | 0,708019  | 0,973571 | <b>0,840795</b>  | 1979 | 2482 | <b>2230,5</b> |
| PIM3     | 1,31795   | 0,363767 | <b>0,8408585</b> | 1703 | 1879 | <b>1791</b>   |
| IL26     | 0,840874  | NaN      | <b>0,840874</b>  | 1654 | NaN  | <b>1654</b>   |
| C8G      | 0,877443  | 0,804364 | <b>0,8409035</b> | 2060 | 1801 | <b>1930,5</b> |
| SCAMP3   | 1,449745  | 0,232117 | <b>0,840931</b>  | 1548 | 2201 | <b>1874,5</b> |
| MFF      | 0,840955  | NaN      | <b>0,840955</b>  | 879  | NaN  | <b>879</b>    |
| NGRN     | 0,313305  | 1,36874  | <b>0,8410225</b> | 1345 | 1972 | <b>1658,5</b> |
| SGSM2    | 1,202808  | 0,479815 | <b>0,8413115</b> | 1784 | 2034 | <b>1909</b>   |
| KRTAP1-5 | 0,751583  | 0,93132  | <b>0,8414515</b> | 1413 | 2123 | <b>1768</b>   |
| COL11A1  | 0,915558  | 0,76768  | <b>0,841619</b>  | 1216 | 1427 | <b>1321,5</b> |
| CHCHD4   | 0,712778  | 0,970712 | <b>0,841745</b>  | 1224 | 1853 | <b>1538,5</b> |
| FAM98B   | 1,063735  | 0,621245 | <b>0,84249</b>   | 1996 | 2208 | <b>2102</b>   |
| MLEC     | 0,8426    | NaN      | <b>0,8426</b>    | 1824 | NaN  | <b>1824</b>   |

|           |           |          |                  |      |      |               |
|-----------|-----------|----------|------------------|------|------|---------------|
| FAM117A   | 1,265167  | 0,420092 | <b>0,8426295</b> | 1906 | 2712 | <b>2309</b>   |
| TNFSF15   | 0,842633  | NaN      | <b>0,842633</b>  | 1991 | NaN  | <b>1991</b>   |
| KDELC1    | 0,535557  | 1,151128 | <b>0,8433425</b> | 1696 | 1527 | <b>1611,5</b> |
| XPNPEP3   | 0,744039  | 0,942919 | <b>0,843479</b>  | 1367 | 1770 | <b>1568,5</b> |
| MGAT5     | 1,020305  | 0,667314 | <b>0,8438095</b> | 1753 | 2104 | <b>1928,5</b> |
| CPB1      | 1,132575  | 0,555913 | <b>0,844244</b>  | 1401 | 1753 | <b>1577</b>   |
| TM9SF4    | 1,098     | 0,591275 | <b>0,8446375</b> | 2184 | 2191 | <b>2187,5</b> |
| HNRNPA0   | 0,823696  | 0,865774 | <b>0,844735</b>  | 1417 | 1340 | <b>1378,5</b> |
| GIMAP7    | 1,201777  | 0,488887 | <b>0,845332</b>  | 1335 | 2078 | <b>1706,5</b> |
| POPDC3    | 0,808478  | 0,882871 | <b>0,8456745</b> | 1370 | 1915 | <b>1642,5</b> |
| USP10     | 0,895307  | 0,796088 | <b>0,8456975</b> | 703  | 1560 | <b>1131,5</b> |
| PUM1      | -0,453094 | 2,144762 | <b>0,845834</b>  | 1587 | 2369 | <b>1978</b>   |
| SPINK1    | 0,780671  | 0,912147 | <b>0,846409</b>  | 1861 | 2473 | <b>2167</b>   |
| HIF3A     | 0,201074  | 1,491863 | <b>0,8464685</b> | 1487 | 1773 | <b>1630</b>   |
| PPME1     | 1,354589  | 0,338433 | <b>0,846511</b>  | 1646 | 1809 | <b>1727,5</b> |
| NR4A3     | 0,828588  | 0,86446  | <b>0,846524</b>  | 1470 | 2026 | <b>1748</b>   |
| TNFSF9    | 0,846854  | NaN      | <b>0,846854</b>  | 1718 | NaN  | <b>1718</b>   |
| RPIA      | 0,762127  | 0,931643 | <b>0,846885</b>  | 1655 | 2005 | <b>1830</b>   |
| GABRA5    | 0,600773  | 1,094398 | <b>0,8475855</b> | 1538 | 2292 | <b>1915</b>   |
| CTRC      | 1,171991  | 0,523601 | <b>0,847796</b>  | 1569 | 1544 | <b>1556,5</b> |
| PTCH2     | 0,589462  | 1,10667  | <b>0,848066</b>  | 1910 | 2633 | <b>2271,5</b> |
| RNF19B    | 0,706265  | 0,990105 | <b>0,848185</b>  | 1709 | 2007 | <b>1858</b>   |
| LRR1Q1    | 1,043041  | 0,653949 | <b>0,848495</b>  | 1298 | 2190 | <b>1744</b>   |
| SIGLEC15  | 0,848639  | NaN      | <b>0,848639</b>  | 1399 | NaN  | <b>1399</b>   |
| CRISPLD1  | 1,231974  | 0,465502 | <b>0,848738</b>  | 1468 | 2222 | <b>1845</b>   |
| TNFRSF10C | 0,040949  | 1,656949 | <b>0,848949</b>  | 1754 | 2702 | <b>2228</b>   |
| C7orf63   | 1,166353  | 0,532031 | <b>0,849192</b>  | 1874 | 2256 | <b>2065</b>   |
| PKIB      | 0,056528  | 1,6422   | <b>0,849364</b>  | 1920 | 1396 | <b>1658</b>   |
| CCDC78    | 1,147795  | 0,551922 | <b>0,8498585</b> | 1772 | 1703 | <b>1737,5</b> |
| DBNL      | 1,123151  | 0,578413 | <b>0,850782</b>  | 2337 | 3567 | <b>2952</b>   |
| IFITM3    | 0,421458  | 1,280483 | <b>0,8509705</b> | 1838 | 1986 | <b>1912</b>   |
| TRIM31    | 0,538216  | 1,166334 | <b>0,852275</b>  | 1345 | 2161 | <b>1753</b>   |
| RNH1      | 0,919995  | 0,785307 | <b>0,852651</b>  | 2008 | 2671 | <b>2339,5</b> |
| DYNLL1    | 0,095608  | 1,610607 | <b>0,8531075</b> | 1101 | 1923 | <b>1512</b>   |

|           |          |           |                  |      |      |               |
|-----------|----------|-----------|------------------|------|------|---------------|
| ITGAX     | 0,613249 | 1,093749  | <b>0,853499</b>  | 974  | 1784 | <b>1379</b>   |
| CCR2      | 0,853768 | NaN       | <b>0,853768</b>  | 1415 | NaN  | <b>1415</b>   |
| DHRS9     | 0,70871  | 0,999103  | <b>0,8539065</b> | 2073 | 1987 | <b>2030</b>   |
| C17orf53  | 0,857727 | 0,85022   | <b>0,8539735</b> | 1369 | 1928 | <b>1648,5</b> |
| ADCK2     | 1,993097 | -0,284421 | <b>0,854338</b>  | 1283 | 1887 | <b>1585</b>   |
| GIMAP2    | 0,854473 | NaN       | <b>0,854473</b>  | 2378 | NaN  | <b>2378</b>   |
| OR4S2     | 0,55655  | 1,15315   | <b>0,85485</b>   | 1375 | 2683 | <b>2029</b>   |
| PPP2R2C   | 1,659088 | 0,051117  | <b>0,8551025</b> | 1215 | 1848 | <b>1531,5</b> |
| STK38     | 0,641985 | 1,068739  | <b>0,855362</b>  | 1280 | 1828 | <b>1554</b>   |
| LCA5      | 0,398627 | 1,312799  | <b>0,855713</b>  | 2172 | 2674 | <b>2423</b>   |
| SRBD1     | 1,114433 | 0,597056  | <b>0,8557445</b> | 1108 | 2357 | <b>1732,5</b> |
| KRTAP21-2 | 0,855825 | NaN       | <b>0,855825</b>  | 1501 | NaN  | <b>1501</b>   |
| AIFM1     | 0,648844 | 1,063044  | <b>0,855944</b>  | 1987 | 2159 | <b>2073</b>   |
| SLC13A1   | 0,871573 | 0,840478  | <b>0,8560255</b> | 1281 | 1948 | <b>1614,5</b> |
| RNF113A   | 1,389807 | 0,322291  | <b>0,856049</b>  | 1517 | 2220 | <b>1868,5</b> |
| C17orf47  | 1,123686 | 0,588897  | <b>0,8562915</b> | 1411 | 2289 | <b>1850</b>   |
| WFIKKN1   | 0,856337 | NaN       | <b>0,856337</b>  | 1727 | NaN  | <b>1727</b>   |
| PLAG1     | 0,058938 | 1,654705  | <b>0,8568215</b> | 1564 | 1637 | <b>1600,5</b> |
| MARS      | NaN      | 0,856873  | <b>0,856873</b>  | NaN  | 2387 | <b>2387</b>   |
| RIN1      | 1,201985 | 0,512611  | <b>0,857298</b>  | 1079 | 2328 | <b>1703,5</b> |
| PAQR9     | 0,923102 | 0,792113  | <b>0,8576075</b> | 1671 | 2217 | <b>1944</b>   |
| CD86      | 1,512505 | 0,202892  | <b>0,8576985</b> | 1727 | 2874 | <b>2300,5</b> |
| FBXO42    | 0,046829 | 1,669565  | <b>0,858197</b>  | 1760 | 2975 | <b>2367,5</b> |
| SERPINA10 | 1,988879 | -0,272175 | <b>0,858352</b>  | 1634 | 2142 | <b>1888</b>   |
| CALCOCO1  | 0,292262 | 1,424794  | <b>0,858528</b>  | 1141 | 1794 | <b>1467,5</b> |
| C7orf11   | 1,404888 | 0,31311   | <b>0,858999</b>  | 1757 | 1672 | <b>1714,5</b> |
| OR4D11    | 1,686879 | 0,031167  | <b>0,859023</b>  | 1779 | 1872 | <b>1825,5</b> |
| NUP205    | 1,087802 | 0,631621  | <b>0,8597115</b> | 1265 | 1468 | <b>1366,5</b> |
| RECQL4    | 0,529528 | 1,190042  | <b>0,859785</b>  | 1506 | 2149 | <b>1827,5</b> |
| CNTLN     | 0,753811 | 0,966493  | <b>0,860152</b>  | 1774 | 1856 | <b>1815</b>   |
| NEDD4     | 0,846253 | 0,874912  | <b>0,8605825</b> | 1250 | 1967 | <b>1608,5</b> |
| C16orf11  | 0,800433 | 0,92107   | <b>0,8607515</b> | 1018 | 1588 | <b>1303</b>   |
| SART3     | 0,860794 | NaN       | <b>0,860794</b>  | 1740 | NaN  | <b>1740</b>   |
| RAP1A     | 1,213035 | 0,508934  | <b>0,8609845</b> | 1633 | 1700 | <b>1666,5</b> |



|          |          |           |                  |      |      |               |
|----------|----------|-----------|------------------|------|------|---------------|
| POLR3C   | 0,655147 | 1,067513  | <b>0,86133</b>   | 1754 | 2145 | <b>1949,5</b> |
| IBA57    | 0,853435 | 0,869485  | <b>0,86146</b>   | 1614 | 2821 | <b>2217,5</b> |
| SUSD2    | 0,862145 | NaN       | <b>0,862145</b>  | 2064 | NaN  | <b>2064</b>   |
| RANBP10  | 1,140884 | 0,583688  | <b>0,862286</b>  | 1604 | 2401 | <b>2002,5</b> |
| PAMR1    | 1,638543 | 0,086478  | <b>0,8625105</b> | 1641 | 2231 | <b>1936</b>   |
| EPHA5    | 0,857988 | 0,86843   | <b>0,863209</b>  | 1350 | 1989 | <b>1669,5</b> |
| NOC4L    | 1,454364 | 0,272167  | <b>0,8632655</b> | 1679 | 2335 | <b>2007</b>   |
| ZNF606   | 1,141604 | 0,586853  | <b>0,8642285</b> | 1615 | 1629 | <b>1622</b>   |
| SLC25A18 | NaN      | 0,864282  | <b>0,864282</b>  | NaN  | 2401 | <b>2401</b>   |
| SBNO2    | 1,592565 | 0,137077  | <b>0,864821</b>  | 1711 | 2194 | <b>1952,5</b> |
| USP37    | 2,038716 | -0,308628 | <b>0,865044</b>  | 1189 | 2097 | <b>1643</b>   |
| TNFSF18  | 0,809204 | 0,921101  | <b>0,8651525</b> | 1943 | 2325 | <b>2134</b>   |
| C1GALT1  | 1,573488 | 0,157897  | <b>0,8656925</b> | 1847 | 2919 | <b>2383</b>   |
| MAS1     | 0,866543 | NaN       | <b>0,866543</b>  | 1966 | NaN  | <b>1966</b>   |
| FRA10AC1 | 0,955402 | 0,777979  | <b>0,8666905</b> | 2052 | 2243 | <b>2147,5</b> |
| CDK5     | 0,542741 | 1,191328  | <b>0,8670345</b> | 1974 | 1567 | <b>1770,5</b> |
| GCKR     | 0,025909 | 1,7086    | <b>0,8672545</b> | 1163 | 2049 | <b>1606</b>   |
| ZNF358   | 1,010788 | 0,724689  | <b>0,8677385</b> | 1756 | 1695 | <b>1725,5</b> |
| FAM131B  | 0,81295  | 0,923562  | <b>0,868256</b>  | 1616 | 1852 | <b>1734</b>   |
| BPIFB1   | 0,849252 | 0,88787   | <b>0,868561</b>  | 1783 | 2117 | <b>1950</b>   |
| CARM1    | 0,638123 | 1,099425  | <b>0,868774</b>  | 1735 | 2019 | <b>1877</b>   |
| TSPAN8   | 0,950179 | 0,787658  | <b>0,8689185</b> | 2084 | 2675 | <b>2379,5</b> |
| PCK1     | 0,99958  | 0,738599  | <b>0,8690895</b> | 1509 | 1816 | <b>1662,5</b> |
| ZNF74    | 0,869136 | NaN       | <b>0,869136</b>  | 1537 | NaN  | <b>1537</b>   |
| C10orf12 | 1,590053 | 0,149144  | <b>0,8695985</b> | 1566 | 2047 | <b>1806,5</b> |
| RBPM52   | 0,870191 | NaN       | <b>0,870191</b>  | 1630 | NaN  | <b>1630</b>   |
| DUOX2    | 1,868419 | -0,128013 | <b>0,870203</b>  | 1601 | 2093 | <b>1847</b>   |
| DDA1     | 0,988444 | 0,752864  | <b>0,870654</b>  | 1472 | 1891 | <b>1681,5</b> |
| BTG1     | 0,967746 | 0,774021  | <b>0,8708835</b> | 1339 | 1990 | <b>1664,5</b> |
| BPIFC    | 0,87115  | NaN       | <b>0,87115</b>   | 1369 | NaN  | <b>1369</b>   |
| SIX3     | NaN      | 0,87175   | <b>0,87175</b>   | NaN  | 2525 | <b>2525</b>   |
| ITM2C    | 0,87226  | NaN       | <b>0,87226</b>   | 1424 | NaN  | <b>1424</b>   |
| PREX2    | 0,320271 | 1,424854  | <b>0,8725625</b> | 2122 | 1931 | <b>2026,5</b> |
| ZNF132   | 0,536983 | 1,208788  | <b>0,8728855</b> | 1498 | 1752 | <b>1625</b>   |

|          |          |          |                  |      |      |               |
|----------|----------|----------|------------------|------|------|---------------|
| GABBR2   | 0,872987 | NaN      | <b>0,872987</b>  | 1548 | NaN  | <b>1548</b>   |
| PPP1R3A  | 0,602709 | 1,143499 | <b>0,873104</b>  | 2154 | 2556 | <b>2355</b>   |
| TTC25    | 0,873293 | NaN      | <b>0,873293</b>  | 1814 | NaN  | <b>1814</b>   |
| BLOC1S3  | 1,598774 | 0,148028 | <b>0,873401</b>  | 1512 | 1736 | <b>1624</b>   |
| EPS8L1   | 0,594392 | 1,152808 | <b>0,8736</b>    | 1627 | 2012 | <b>1819,5</b> |
| TRAF1    | 1,564889 | 0,182402 | <b>0,8736455</b> | 1169 | 1979 | <b>1574</b>   |
| CXorf41  | 0,757099 | 0,990464 | <b>0,8737815</b> | 1809 | 3121 | <b>2465</b>   |
| CILP     | 0,962658 | 0,785735 | <b>0,8741965</b> | 2007 | 2220 | <b>2113,5</b> |
| ENPEP    | 1,242714 | 0,505759 | <b>0,8742365</b> | 1839 | 1462 | <b>1650,5</b> |
| ZNF25    | 0,874696 | NaN      | <b>0,874696</b>  | 1524 | NaN  | <b>1524</b>   |
| SERTAD4  | 0,818423 | 0,931085 | <b>0,874754</b>  | 1893 | 2467 | <b>2180</b>   |
| FAM149A  | 1,411785 | 0,337747 | <b>0,874766</b>  | 1990 | 1906 | <b>1948</b>   |
| OR1L3    | 0,87516  | NaN      | <b>0,87516</b>   | 1730 | NaN  | <b>1730</b>   |
| CKMT2    | 0,718056 | 1,033119 | <b>0,8755875</b> | 2022 | 1978 | <b>2000</b>   |
| ATAD1    | 0,508925 | 1,24263  | <b>0,8757775</b> | 1456 | 2652 | <b>2054</b>   |
| MYH7B    | 0,617911 | 1,134018 | <b>0,8759645</b> | 926  | 2075 | <b>1500,5</b> |
| STK11IP  | 0,024057 | 1,728009 | <b>0,876033</b>  | 742  | 1978 | <b>1360</b>   |
| ARF3     | 0,924448 | 0,828142 | <b>0,876295</b>  | 1370 | 1641 | <b>1505,5</b> |
| ARL4D    | 0,82349  | 0,930126 | <b>0,876808</b>  | 839  | 1188 | <b>1013,5</b> |
| XAF1     | 0,877193 | NaN      | <b>0,877193</b>  | 1577 | NaN  | <b>1577</b>   |
| ZNF248   | 0,889611 | 0,865105 | <b>0,877358</b>  | 1881 | 2467 | <b>2174</b>   |
| STRADB   | 1,197608 | 0,557637 | <b>0,8776225</b> | 1964 | 1872 | <b>1918</b>   |
| DCAF12L2 | 0,877807 | NaN      | <b>0,877807</b>  | 1765 | NaN  | <b>1765</b>   |
| SPACA7   | 1,595757 | 0,159986 | <b>0,8778715</b> | 1796 | 2303 | <b>2049,5</b> |
| DSCC1    | 1,472833 | 0,282993 | <b>0,877913</b>  | 1661 | 1971 | <b>1816</b>   |
| IL9      | 0,046588 | 1,709401 | <b>0,8779945</b> | 1578 | 2283 | <b>1930,5</b> |
| OR13G1   | 0,525579 | 1,23055  | <b>0,8780645</b> | 1727 | 2737 | <b>2232</b>   |
| IFLTD1   | 0,878082 | NaN      | <b>0,878082</b>  | 1532 | NaN  | <b>1532</b>   |
| GRM8     | 0,878451 | NaN      | <b>0,878451</b>  | 1622 | NaN  | <b>1622</b>   |
| PCCB     | 0,873955 | 0,884608 | <b>0,8792815</b> | 1280 | 1329 | <b>1304,5</b> |
| PPP1R12A | 0,484146 | 1,274431 | <b>0,8792885</b> | 600  | 1006 | <b>803</b>    |
| 08-mars  | 0,297952 | 1,461239 | <b>0,8795955</b> | 1445 | 1649 | <b>1547</b>   |
| GOLGB1   | 0,879892 | NaN      | <b>0,879892</b>  | 1490 | NaN  | <b>1490</b>   |
| GJA1     | 0,898513 | 0,862209 | <b>0,880361</b>  | 1734 | 2247 | <b>1990,5</b> |

|          |          |           |                  |      |      |               |
|----------|----------|-----------|------------------|------|------|---------------|
| SVOP     | 1,02655  | 0,734239  | <b>0,8803945</b> | 1475 | 2337 | <b>1906</b>   |
| DBN1     | 0,224062 | 1,537388  | <b>0,880725</b>  | 1241 | 1385 | <b>1313</b>   |
| NFXL1    | 0,881043 | NaN       | <b>0,881043</b>  | 1764 | NaN  | <b>1764</b>   |
| KLHL30   | 2,370843 | -0,608701 | <b>0,881071</b>  | 1424 | 1514 | <b>1469</b>   |
| OR4C12   | 1,277571 | 0,485044  | <b>0,8813075</b> | 1876 | 2232 | <b>2054</b>   |
| FBXO15   | 1,062266 | 0,70085   | <b>0,881558</b>  | 1869 | 2812 | <b>2340,5</b> |
| P2RY4    | 0,881672 | NaN       | <b>0,881672</b>  | 1793 | NaN  | <b>1793</b>   |
| PER2     | 1,580839 | 0,182528  | <b>0,8816835</b> | 2002 | 1631 | <b>1816,5</b> |
| TSEN15   | 1,647838 | 0,115678  | <b>0,881758</b>  | 1778 | 1868 | <b>1823</b>   |
| CHST4    | 0,006873 | 1,757626  | <b>0,8822495</b> | 1669 | 1640 | <b>1654,5</b> |
| LRRC55   | 1,161514 | 0,604388  | <b>0,882951</b>  | 1908 | 2784 | <b>2346</b>   |
| MPV17    | 1,517544 | 0,249239  | <b>0,8833915</b> | 1333 | 2404 | <b>1868,5</b> |
| KLHL14   | 1,058783 | 0,708653  | <b>0,883718</b>  | 1776 | 2455 | <b>2115,5</b> |
| HLA-A    | 0,63789  | 1,130003  | <b>0,8839465</b> | 1522 | 1953 | <b>1737,5</b> |
| TNP1     | 0,884065 | NaN       | <b>0,884065</b>  | 1466 | NaN  | <b>1466</b>   |
| CYP2U1   | 0,824294 | 0,944172  | <b>0,884233</b>  | 2293 | 1898 | <b>2095,5</b> |
| TMEM47   | 0,806147 | 0,962331  | <b>0,884239</b>  | 2216 | 1896 | <b>2056</b>   |
| KLRAQ1   | 0,8844   | NaN       | <b>0,8844</b>    | 2246 | NaN  | <b>2246</b>   |
| ALKBH1   | 1,322103 | 0,447244  | <b>0,8846735</b> | 1773 | 1859 | <b>1816</b>   |
| ALAS1    | 0,845854 | 0,923566  | <b>0,88471</b>   | 1657 | 2306 | <b>1981,5</b> |
| NFX1     | 1,349467 | 0,420154  | <b>0,8848105</b> | 1305 | 1717 | <b>1511</b>   |
| FAM125A  | 0,502596 | 1,267081  | <b>0,8848385</b> | 1802 | 2054 | <b>1928</b>   |
| C1orf150 | 1,142618 | 0,627695  | <b>0,8851565</b> | 1859 | 2301 | <b>2080</b>   |
| SHOC2    | 0,90405  | 0,86627   | <b>0,88516</b>   | 1524 | 2085 | <b>1804,5</b> |
| B3GNT2   | 1,006388 | 0,764056  | <b>0,885222</b>  | 1611 | 2306 | <b>1958,5</b> |
| SRFBP1   | 1,061394 | 0,709175  | <b>0,8852845</b> | 1767 | 1936 | <b>1851,5</b> |
| POLR1E   | 0,885455 | NaN       | <b>0,885455</b>  | 1467 | NaN  | <b>1467</b>   |
| TMEM143  | 0,885776 | NaN       | <b>0,885776</b>  | 1542 | NaN  | <b>1542</b>   |
| IFNA16   | 0,46398  | 1,308707  | <b>0,8863435</b> | 1547 | 2537 | <b>2042</b>   |
| CA4      | 0,824226 | 0,950302  | <b>0,887264</b>  | 1656 | 1313 | <b>1484,5</b> |
| ATP13A2  | 1,462861 | 0,312879  | <b>0,88787</b>   | 1446 | 1592 | <b>1519</b>   |
| NSUN2    | 0,90875  | 0,867786  | <b>0,888268</b>  | 1698 | 2280 | <b>1989</b>   |
| CARD18   | 0,505214 | 1,271376  | <b>0,888295</b>  | 1459 | 2085 | <b>1772</b>   |
| MAGT1    | 0,888529 | NaN       | <b>0,888529</b>  | 1618 | NaN  | <b>1618</b>   |

|          |           |           |                  |      |      |               |
|----------|-----------|-----------|------------------|------|------|---------------|
| ZNF76    | 2,093636  | -0,316231 | <b>0,8887025</b> | 918  | 1081 | <b>999,5</b>  |
| METTL9   | 1,109917  | 0,667932  | <b>0,8889245</b> | 1684 | 2120 | <b>1902</b>   |
| MMP10    | -0,049415 | 1,827422  | <b>0,8890035</b> | 1769 | 1667 | <b>1718</b>   |
| USP35    | 1,292114  | 0,487695  | <b>0,8899045</b> | 1030 | 2086 | <b>1558</b>   |
| CCS      | 1,403013  | 0,378302  | <b>0,8906575</b> | 1828 | 1530 | <b>1679</b>   |
| VPS72    | 0,845897  | 0,935511  | <b>0,890704</b>  | 1294 | 1897 | <b>1595,5</b> |
| LHX6     | 0,954237  | 0,827423  | <b>0,89083</b>   | 1449 | 2316 | <b>1882,5</b> |
| ESCO1    | 1,410919  | 0,371049  | <b>0,890984</b>  | 1602 | 1925 | <b>1763,5</b> |
| MILR1    | 0,891607  | NaN       | <b>0,891607</b>  | 1740 | NaN  | <b>1740</b>   |
| SERPINE1 | 1,424262  | 0,359893  | <b>0,8920775</b> | 1448 | 1449 | <b>1448,5</b> |
| DUSP14   | 1,149685  | 0,634514  | <b>0,8920995</b> | 1355 | 1692 | <b>1523,5</b> |
| NLRP3    | 1,764023  | 0,020247  | <b>0,892135</b>  | 1806 | 2357 | <b>2081,5</b> |
| SLC16A10 | 1,018415  | 0,767145  | <b>0,89278</b>   | 1558 | 2386 | <b>1972</b>   |
| ZSWIM3   | 0,729824  | 1,056324  | <b>0,893074</b>  | 1179 | 2299 | <b>1739</b>   |
| TMEM86B  | 1,135275  | 0,650979  | <b>0,893127</b>  | 1418 | 1790 | <b>1604</b>   |
| ERAS     | 0,737164  | 1,050266  | <b>0,893715</b>  | 1334 | 1983 | <b>1658,5</b> |
| PSMB10   | -0,159784 | 1,94805   | <b>0,894133</b>  | 1113 | 1417 | <b>1265</b>   |
| AP2A1    | 0,617721  | 1,170928  | <b>0,8943245</b> | 1418 | 1693 | <b>1555,5</b> |
| STXBP4   | 0,894414  | NaN       | <b>0,894414</b>  | 1925 | NaN  | <b>1925</b>   |
| CNKSRR2  | 0,788211  | 1,00129   | <b>0,8947505</b> | 1780 | 1966 | <b>1873</b>   |
| FMR1NB   | 0,894895  | NaN       | <b>0,894895</b>  | 1349 | NaN  | <b>1349</b>   |
| ZNF530   | 0,894905  | NaN       | <b>0,894905</b>  | 1522 | NaN  | <b>1522</b>   |
| SPATA17  | 0,918942  | 0,870893  | <b>0,8949175</b> | 1421 | 1875 | <b>1648</b>   |
| CHRNA9   | 0,760147  | 1,029937  | <b>0,895042</b>  | 1630 | 2345 | <b>1987,5</b> |
| LSM11    | 1,252346  | 0,537866  | <b>0,895106</b>  | 1542 | 1359 | <b>1450,5</b> |
| TSPAN6   | 0,895326  | NaN       | <b>0,895326</b>  | 1786 | NaN  | <b>1786</b>   |
| POLA2    | 1,430153  | 0,362149  | <b>0,896151</b>  | 947  | 1244 | <b>1095,5</b> |
| PTX4     | 0,896268  | NaN       | <b>0,896268</b>  | 1607 | NaN  | <b>1607</b>   |
| FGD5     | 0,897471  | NaN       | <b>0,897471</b>  | 1864 | NaN  | <b>1864</b>   |
| XPO6     | 1,359331  | 0,435627  | <b>0,897479</b>  | 1329 | 2151 | <b>1740</b>   |
| PRPF8    | 1,709354  | 0,085857  | <b>0,8976055</b> | 976  | 802  | <b>889</b>    |
| CIRH1A   | 0,897725  | NaN       | <b>0,897725</b>  | 1195 | NaN  | <b>1195</b>   |
| GCC2     | -0,186336 | 1,982465  | <b>0,8980645</b> | 2406 | 2597 | <b>2501,5</b> |
| AFF3     | 0,484531  | 1,312661  | <b>0,898596</b>  | 1668 | 2197 | <b>1932,5</b> |

|           |           |          |                  |      |      |               |
|-----------|-----------|----------|------------------|------|------|---------------|
| KIAA2013  | 0,898733  | NaN      | <b>0,898733</b>  | 1462 | NaN  | <b>1462</b>   |
| C14orf159 | 0,961956  | 0,83595  | <b>0,898953</b>  | 1750 | 1772 | <b>1761</b>   |
| MAF       | 0,552681  | 1,245473 | <b>0,899077</b>  | 1362 | 1903 | <b>1632,5</b> |
| FNDC9     | 1,250148  | 0,548031 | <b>0,8990895</b> | 1337 | 1743 | <b>1540</b>   |
| SEMA6C    | -0,593087 | 2,393426 | <b>0,9001695</b> | 1969 | 2343 | <b>2156</b>   |
| INPP5A    | 0,584902  | 1,216257 | <b>0,9005795</b> | 1982 | 2356 | <b>2169</b>   |
| CHUK      | 0,56803   | 1,233185 | <b>0,9006075</b> | 1280 | 2139 | <b>1709,5</b> |
| EIF4G3    | 0,424628  | 1,376955 | <b>0,9007915</b> | 1671 | 1848 | <b>1759,5</b> |
| CRLF1     | 0,988371  | 0,814106 | <b>0,9012385</b> | 1636 | 1831 | <b>1733,5</b> |
| CAPRIN2   | 0,901582  | NaN      | <b>0,901582</b>  | 1790 | NaN  | <b>1790</b>   |
| TMC5      | 0,484842  | 1,318326 | <b>0,901584</b>  | 1505 | 2054 | <b>1779,5</b> |
| SLCO1B1   | 1,224434  | 0,578778 | <b>0,901606</b>  | 1895 | 2067 | <b>1981</b>   |
| GPR183    | 0,901658  | NaN      | <b>0,901658</b>  | 1433 | NaN  | <b>1433</b>   |
| ITPKB     | 1,117676  | 0,685849 | <b>0,9017625</b> | 1634 | 2393 | <b>2013,5</b> |
| FZD7      | 0,901798  | NaN      | <b>0,901798</b>  | 1770 | NaN  | <b>1770</b>   |
| GGA2      | 1,004758  | 0,799691 | <b>0,9022245</b> | 1842 | 1639 | <b>1740,5</b> |
| C5orf30   | 1,169774  | 0,635239 | <b>0,9025065</b> | 1577 | 2109 | <b>1843</b>   |
| LCN12     | 0,451702  | 1,353346 | <b>0,902524</b>  | 1457 | 2308 | <b>1882,5</b> |
| TET2      | 0,902533  | NaN      | <b>0,902533</b>  | 1315 | NaN  | <b>1315</b>   |
| POLM      | 1,163181  | 0,644493 | <b>0,903837</b>  | 999  | 1625 | <b>1312</b>   |
| CAPN13    | 0,037115  | 1,770626 | <b>0,9038705</b> | 1459 | 1915 | <b>1687</b>   |
| RSPRY1    | 0,684245  | 1,12358  | <b>0,9039125</b> | 1048 | 1762 | <b>1405</b>   |
| SLC38A3   | 0,903616  | 0,904312 | <b>0,903964</b>  | 1861 | 2267 | <b>2064</b>   |
| NDUFV2    | 0,979755  | 0,82842  | <b>0,9040875</b> | 1527 | 1832 | <b>1679,5</b> |
| RASGRF1   | 0,904464  | NaN      | <b>0,904464</b>  | 1831 | NaN  | <b>1831</b>   |
| DTNBP1    | 1,485974  | 0,323794 | <b>0,904884</b>  | 1620 | 2182 | <b>1901</b>   |
| NFIL3     | 0,449767  | 1,36056  | <b>0,9051635</b> | 1859 | 1866 | <b>1862,5</b> |
| CACHD1    | 0,443503  | 1,367562 | <b>0,9055325</b> | 1864 | 2418 | <b>2141</b>   |
| CCT8L2    | 0,917286  | 0,893976 | <b>0,905631</b>  | 1347 | 1302 | <b>1324,5</b> |
| RHOQ      | 1,403047  | 0,408624 | <b>0,9058355</b> | 1770 | 2555 | <b>2162,5</b> |
| GADD45G   | NaN       | 0,906142 | <b>0,906142</b>  | NaN  | 2596 | <b>2596</b>   |
| MTHFSD    | 0,906282  | NaN      | <b>0,906282</b>  | 1518 | NaN  | <b>1518</b>   |
| RAB36     | 0,320926  | 1,493149 | <b>0,9070375</b> | 1414 | 1676 | <b>1545</b>   |
| FOXN1     | 0,319873  | 1,495107 | <b>0,90749</b>   | 1483 | 1751 | <b>1617</b>   |

|          |          |           |                  |      |      |               |
|----------|----------|-----------|------------------|------|------|---------------|
| PDZD2    | 1,33151  | 0,483762  | <b>0,907636</b>  | 1710 | 2128 | <b>1919</b>   |
| CD53     | 0,907702 | NaN       | <b>0,907702</b>  | 1695 | NaN  | <b>1695</b>   |
| PARS2    | 0,907775 | NaN       | <b>0,907775</b>  | 1752 | NaN  | <b>1752</b>   |
| GRIPAP1  | 0,907886 | NaN       | <b>0,907886</b>  | 1861 | NaN  | <b>1861</b>   |
| SLC24A6  | 1,173895 | 0,64223   | <b>0,9080625</b> | 1545 | 2536 | <b>2040,5</b> |
| KATNAL1  | 0,810353 | 1,006301  | <b>0,908327</b>  | 1259 | 1694 | <b>1476,5</b> |
| LRRC57   | 1,046832 | 0,769841  | <b>0,9083365</b> | 1728 | 1855 | <b>1791,5</b> |
| PTCRA    | 1,10357  | 0,713176  | <b>0,908373</b>  | 1537 | 1069 | <b>1303</b>   |
| LRPPRC   | 1,053961 | 0,763509  | <b>0,908735</b>  | 1448 | 2427 | <b>1937,5</b> |
| C4orf3   | 1,133314 | 0,684908  | <b>0,909111</b>  | 1947 | 2008 | <b>1977,5</b> |
| NPNT     | 1,059694 | 0,758906  | <b>0,9093</b>    | 1571 | 2044 | <b>1807,5</b> |
| SYT14    | 0,739792 | 1,079127  | <b>0,9094595</b> | 1206 | 2183 | <b>1694,5</b> |
| KLF8     | 0,909643 | NaN       | <b>0,909643</b>  | 1581 | NaN  | <b>1581</b>   |
| E2F7     | 0,731163 | 1,089461  | <b>0,910312</b>  | 1452 | 2156 | <b>1804</b>   |
| FAM167A  | 0,910333 | NaN       | <b>0,910333</b>  | 1564 | NaN  | <b>1564</b>   |
| XRN1     | 1,372454 | 0,448408  | <b>0,910431</b>  | 1225 | 1553 | <b>1389</b>   |
| GPI      | 0,49993  | 1,321747  | <b>0,9108385</b> | 1170 | 1595 | <b>1382,5</b> |
| BNIP3L   | 0,910918 | NaN       | <b>0,910918</b>  | 1454 | NaN  | <b>1454</b>   |
| OR8K5    | 0,630015 | 1,192067  | <b>0,911041</b>  | 1886 | 2124 | <b>2005</b>   |
| PAPOLG   | 1,865707 | -0,043464 | <b>0,9111215</b> | 1758 | 2749 | <b>2253,5</b> |
| CLCN1    | 0,553781 | 1,269514  | <b>0,9116475</b> | 1753 | 2282 | <b>2017,5</b> |
| KDM5D    | 0,556021 | 1,267527  | <b>0,911774</b>  | 1545 | 2480 | <b>2012,5</b> |
| IL17RB   | 1,368707 | 0,45529   | <b>0,9119985</b> | 1705 | 1875 | <b>1790</b>   |
| KLHL21   | 1,354226 | 0,470631  | <b>0,9124285</b> | 1588 | 2099 | <b>1843,5</b> |
| KCNA7    | 1,012802 | 0,813008  | <b>0,912905</b>  | 1456 | 2334 | <b>1895</b>   |
| TRIM32   | 0,788833 | 1,037553  | <b>0,913193</b>  | 1288 | 2100 | <b>1694</b>   |
| OR13C3   | 0,351372 | 1,475493  | <b>0,9134325</b> | 1469 | 1454 | <b>1461,5</b> |
| C7orf23  | 0,783131 | 1,045144  | <b>0,9141375</b> | 1885 | 2281 | <b>2083</b>   |
| DOK3     | 1,946503 | -0,117576 | <b>0,9144635</b> | 1659 | 1787 | <b>1723</b>   |
| C10orf28 | 1,376427 | 0,453741  | <b>0,915084</b>  | 690  | 1483 | <b>1086,5</b> |
| NMNA2    | 2,625885 | -0,795153 | <b>0,915366</b>  | 1502 | 2158 | <b>1830</b>   |
| TCTE3    | 0,973657 | 0,858356  | <b>0,9160065</b> | 1860 | 2050 | <b>1955</b>   |
| FTSJD1   | 1,29593  | 0,536109  | <b>0,9160195</b> | 1870 | 2541 | <b>2205,5</b> |
| FRY      | 0,916246 | NaN       | <b>0,916246</b>  | 1717 | NaN  | <b>1717</b>   |

|           |          |           |                  |      |      |               |
|-----------|----------|-----------|------------------|------|------|---------------|
| PLA2G4A   | 0,7935   | 1,039453  | <b>0,9164765</b> | 1606 | 1926 | <b>1766</b>   |
| CCL26     | 0,53173  | 1,301565  | <b>0,9166475</b> | 1099 | 1849 | <b>1474</b>   |
| RGS2      | 1,286229 | 0,548106  | <b>0,9171675</b> | 1103 | 1654 | <b>1378,5</b> |
| SERPINA12 | 1,191949 | 0,642569  | <b>0,917259</b>  | 1353 | 1821 | <b>1587</b>   |
| COL4A6    | 0,793051 | 1,041511  | <b>0,917281</b>  | 1821 | 2216 | <b>2018,5</b> |
| OR51F2    | 0,661342 | 1,173282  | <b>0,917312</b>  | 1983 | 2371 | <b>2177</b>   |
| TCL6      | 1,874389 | -0,038718 | <b>0,9178355</b> | 1959 | 2210 | <b>2084,5</b> |
| LAMB3     | 1,07138  | 0,765     | <b>0,91819</b>   | 1370 | 1790 | <b>1580</b>   |
| CLDN20    | 0,789047 | 1,047746  | <b>0,9183965</b> | 2203 | 2853 | <b>2528</b>   |
| NME4      | 0,760025 | 1,07684   | <b>0,9184325</b> | 1789 | 2207 | <b>1998</b>   |
| ARV1      | 0,875074 | 0,962233  | <b>0,9186535</b> | 1746 | 2334 | <b>2040</b>   |
| FFAR3     | 0,425662 | 1,411741  | <b>0,9187015</b> | 2547 | 2376 | <b>2461,5</b> |
| FTCD      | 0,918998 | NaN       | <b>0,918998</b>  | 1496 | NaN  | <b>1496</b>   |
| CLDN5     | 0,919117 | NaN       | <b>0,919117</b>  | 1675 | NaN  | <b>1675</b>   |
| TARBP1    | 0,905447 | 0,932866  | <b>0,9191565</b> | 1747 | 2216 | <b>1981,5</b> |
| IFT80     | 0,249678 | 1,588688  | <b>0,919183</b>  | 1930 | 2288 | <b>2109</b>   |
| C3orf21   | 0,73358  | 1,105077  | <b>0,9193285</b> | 1191 | 1595 | <b>1393</b>   |
| ULK3      | 1,451269 | 0,387893  | <b>0,919581</b>  | 1728 | 2121 | <b>1924,5</b> |
| SLC30A10  | 0,687468 | 1,151929  | <b>0,9196985</b> | 1803 | 3056 | <b>2429,5</b> |
| CHD9      | 0,737451 | 1,102584  | <b>0,9200175</b> | 1906 | 2268 | <b>2087</b>   |
| RIBC2     | 1,06101  | 0,77972   | <b>0,920365</b>  | 1683 | 2117 | <b>1900</b>   |
| TFIP11    | 0,70832  | 1,132927  | <b>0,9206235</b> | 1232 | 1469 | <b>1350,5</b> |
| SPOPL     | 0,131063 | 1,710419  | <b>0,920741</b>  | 2098 | 2335 | <b>2216,5</b> |
| CTAGE1    | 1,49071  | 0,350897  | <b>0,9208035</b> | 1424 | 1275 | <b>1349,5</b> |
| PNLIPRP3  | 1,30811  | 0,533913  | <b>0,9210115</b> | 1933 | 2306 | <b>2119,5</b> |
| EIF2D     | 1,461375 | 0,382111  | <b>0,921743</b>  | 1658 | 2503 | <b>2080,5</b> |
| MTHFD2L   | 0,704002 | 1,140113  | <b>0,9220575</b> | 1411 | 1791 | <b>1601</b>   |
| BHLHB9    | 0,92218  | NaN       | <b>0,92218</b>   | 2156 | NaN  | <b>2156</b>   |
| CTSD      | 0,006224 | 1,838403  | <b>0,9223135</b> | 1589 | 1667 | <b>1628</b>   |
| C5orf22   | 1,15307  | 0,692557  | <b>0,9228135</b> | 1382 | 1821 | <b>1601,5</b> |
| UBA1      | 1,298096 | 0,54815   | <b>0,923123</b>  | 1644 | 2384 | <b>2014</b>   |
| MAGEB10   | 0,397612 | 1,449093  | <b>0,9233525</b> | 1652 | 2149 | <b>1900,5</b> |
| GOLPH3    | 0,857466 | 0,989264  | <b>0,923365</b>  | 1454 | 1926 | <b>1690</b>   |
| C6orf48   | 0,923406 | NaN       | <b>0,923406</b>  | 1801 | NaN  | <b>1801</b>   |

|          |           |           |                  |      |      |               |
|----------|-----------|-----------|------------------|------|------|---------------|
| HAUS1    | 0,365586  | 1,481576  | <b>0,923581</b>  | 1400 | 1610 | <b>1505</b>   |
| PLD2     | 0,393852  | 1,453463  | <b>0,9236575</b> | 2035 | 3150 | <b>2592,5</b> |
| LIN7B    | 1,878317  | -0,030761 | <b>0,923778</b>  | 1394 | 2155 | <b>1774,5</b> |
| SLC4A1   | -0,181719 | 2,030168  | <b>0,9242245</b> | 1510 | 2241 | <b>1875,5</b> |
| TP53I13  | 1,095735  | 0,75326   | <b>0,9244975</b> | 1552 | 1985 | <b>1768,5</b> |
| TRIM28   | 1,194192  | 0,655345  | <b>0,9247685</b> | 1872 | 1828 | <b>1850</b>   |
| ZNF526   | 0,711964  | 1,140142  | <b>0,926053</b>  | 2204 | 2567 | <b>2385,5</b> |
| KIAA0564 | 1,155218  | 0,69801   | <b>0,926614</b>  | 1727 | 2260 | <b>1993,5</b> |
| TTR      | NaN       | 0,926699  | <b>0,926699</b>  | NaN  | 3455 | <b>3455</b>   |
| NECAB3   | 1,040985  | 0,81253   | <b>0,9267575</b> | 2248 | 1760 | <b>2004</b>   |
| CASP6    | 0,211291  | 1,642307  | <b>0,926799</b>  | 1981 | 2322 | <b>2151,5</b> |
| EAPP     | 0,927285  | NaN       | <b>0,927285</b>  | 1874 | NaN  | <b>1874</b>   |
| IFI6     | 0,92749   | NaN       | <b>0,92749</b>   | 1774 | NaN  | <b>1774</b>   |
| FBXL17   | 1,026957  | 0,828267  | <b>0,927612</b>  | 1936 | 3060 | <b>2498</b>   |
| ZNF19    | 1,354889  | 0,50044   | <b>0,9276645</b> | 1388 | 1631 | <b>1509,5</b> |
| GRINA    | 0,637913  | 1,217466  | <b>0,9276895</b> | 1520 | 2482 | <b>2001</b>   |
| CDV3     | 0,628721  | 1,227873  | <b>0,928297</b>  | 1547 | 1878 | <b>1712,5</b> |
| ZNF428   | 0,904065  | 0,952572  | <b>0,9283185</b> | 1683 | 2006 | <b>1844,5</b> |
| NTRK1    | 0,846664  | 1,010209  | <b>0,9284365</b> | 1643 | 2428 | <b>2035,5</b> |
| APBB2    | 1,237228  | 0,620089  | <b>0,9286585</b> | 1487 | 1818 | <b>1652,5</b> |
| SUMF1    | 1,260061  | 0,597502  | <b>0,9287815</b> | 1177 | 1875 | <b>1526</b>   |
| TUBGCP6  | 0,704971  | 1,152904  | <b>0,9289375</b> | 1320 | 1559 | <b>1439,5</b> |
| SAFB     | 0,929059  | NaN       | <b>0,929059</b>  | 1570 | NaN  | <b>1570</b>   |
| MB21D2   | 0,575598  | 1,2842    | <b>0,929899</b>  | 1806 | 2628 | <b>2217</b>   |
| OSBPL11  | 0,929992  | NaN       | <b>0,929992</b>  | 1989 | NaN  | <b>1989</b>   |
| GM2A     | 1,468386  | 0,391742  | <b>0,930064</b>  | 1171 | 2222 | <b>1696,5</b> |
| IL17F    | 1,368326  | 0,492159  | <b>0,9302425</b> | 2011 | 2454 | <b>2232,5</b> |
| TNS1     | 0,930784  | NaN       | <b>0,930784</b>  | 1678 | NaN  | <b>1678</b>   |
| GRIP2    | 0,930913  | NaN       | <b>0,930913</b>  | 1335 | NaN  | <b>1335</b>   |
| COL5A2   | 0,38962   | 1,472559  | <b>0,9310895</b> | 1288 | 1909 | <b>1598,5</b> |
| OR9Q1    | 0,38369   | 1,479399  | <b>0,9315445</b> | 1953 | 1997 | <b>1975</b>   |
| POM121L2 | 0,428681  | 1,434423  | <b>0,931552</b>  | 1757 | 2009 | <b>1883</b>   |
| TRIM60   | 1,060026  | 0,803851  | <b>0,9319385</b> | 846  | 1728 | <b>1287</b>   |
| SLCO2A1  | 0,659015  | 1,205182  | <b>0,9320985</b> | 1804 | 2343 | <b>2073,5</b> |



|           |           |          |                  |      |      |               |
|-----------|-----------|----------|------------------|------|------|---------------|
| PPIL6     | 0,7951    | 1,069626 | <b>0,932363</b>  | 1692 | 2982 | <b>2337</b>   |
| DNAAF1    | 0,748113  | 1,116836 | <b>0,9324745</b> | 1681 | 2517 | <b>2099</b>   |
| RDX       | -0,574028 | 2,439106 | <b>0,932539</b>  | 1913 | 1771 | <b>1842</b>   |
| FLRT1     | 1,348156  | 0,51815  | <b>0,933153</b>  | 1523 | 1627 | <b>1575</b>   |
| SIX6      | 1,107294  | 0,760767 | <b>0,9340305</b> | 1647 | 2387 | <b>2017</b>   |
| ELAVL1    | 0,627439  | 1,240626 | <b>0,9340325</b> | 1637 | 2458 | <b>2047,5</b> |
| C1orf151  | 1,172112  | 0,696266 | <b>0,934189</b>  | 1787 | 1893 | <b>1840</b>   |
| C1orf55   | 1,417021  | 0,451898 | <b>0,9344595</b> | 1641 | 2030 | <b>1835,5</b> |
| SLC25A25  | 1,316519  | 0,552493 | <b>0,934506</b>  | 1497 | 2024 | <b>1760,5</b> |
| KIF26B    | 0,709018  | 1,160584 | <b>0,934801</b>  | 1809 | 1967 | <b>1888</b>   |
| UGDH      | 1,241644  | 0,628025 | <b>0,9348345</b> | 1985 | 1896 | <b>1940,5</b> |
| MBD4      | NaN       | 0,93548  | <b>0,93548</b>   | NaN  | 1815 | <b>1815</b>   |
| DEFB116   | 0,197725  | 1,673348 | <b>0,9355365</b> | 1608 | 1919 | <b>1763,5</b> |
| RAB35     | 0,916682  | 0,955084 | <b>0,935883</b>  | 1477 | 1663 | <b>1570</b>   |
| DYRK1B    | 1,665877  | 0,205962 | <b>0,9359195</b> | 1664 | 2014 | <b>1839</b>   |
| ABCG1     | 0,756581  | 1,116245 | <b>0,936413</b>  | 870  | 712  | <b>791</b>    |
| C14orf169 | 1,334424  | 0,538465 | <b>0,9364445</b> | 1580 | 2797 | <b>2188,5</b> |
| PHYH      | 1,200074  | 0,673352 | <b>0,936713</b>  | 1695 | 2799 | <b>2247</b>   |
| PIAS2     | NaN       | 0,937214 | <b>0,937214</b>  | NaN  | 2732 | <b>2732</b>   |
| MUC15     | 0,937286  | NaN      | <b>0,937286</b>  | 1785 | NaN  | <b>1785</b>   |
| TPP2      | 0,687099  | 1,187728 | <b>0,9374135</b> | 1628 | 1903 | <b>1765,5</b> |
| ZNF192    | 1,165337  | 0,709748 | <b>0,9375425</b> | 2211 | 1968 | <b>2089,5</b> |
| TAAR9     | 0,294706  | 1,580558 | <b>0,937632</b>  | 1292 | 1369 | <b>1330,5</b> |
| AGTRAP    | 0,937831  | NaN      | <b>0,937831</b>  | 1545 | NaN  | <b>1545</b>   |
| ADPRHL1   | 0,164868  | 1,712114 | <b>0,938491</b>  | 1615 | 2858 | <b>2236,5</b> |
| NUCB1     | -0,296051 | 2,17311  | <b>0,9385295</b> | 1883 | 2237 | <b>2060</b>   |
| SUSD3     | 0,726547  | 1,151401 | <b>0,938974</b>  | 1878 | 2468 | <b>2173</b>   |
| APLP1     | 0,844037  | 1,034489 | <b>0,939263</b>  | 1406 | 1813 | <b>1609,5</b> |
| COQ3      | 1,285023  | 0,594018 | <b>0,9395205</b> | 1843 | 2208 | <b>2025,5</b> |
| TULP4     | 1,413207  | 0,466024 | <b>0,9396155</b> | 1700 | 2250 | <b>1975</b>   |
| ELTD1     | 1,153797  | 0,725702 | <b>0,9397495</b> | 1746 | 1760 | <b>1753</b>   |
| ARHGEF19  | 0,872476  | 1,007446 | <b>0,939961</b>  | 1780 | 2470 | <b>2125</b>   |
| PECR      | 0,253882  | 1,626559 | <b>0,9402205</b> | 1258 | 1881 | <b>1569,5</b> |
| SPP2      | 0,940691  | NaN      | <b>0,940691</b>  | 1676 | NaN  | <b>1676</b>   |

|          |          |          |                  |      |      |               |
|----------|----------|----------|------------------|------|------|---------------|
| SOS2     | 1,307326 | 0,574206 | <b>0,940766</b>  | 2126 | 2675 | <b>2400,5</b> |
| C4BPB    | 1,004083 | 0,877555 | <b>0,940819</b>  | 1993 | 2027 | <b>2010</b>   |
| SUGP2    | 0,940858 | NaN      | <b>0,940858</b>  | 1602 | NaN  | <b>1602</b>   |
| ZNF552   | 0,905554 | 0,976467 | <b>0,9410105</b> | 2122 | 2226 | <b>2174</b>   |
| INHBB    | 1,459992 | 0,422737 | <b>0,9413645</b> | 1710 | 2947 | <b>2328,5</b> |
| DEFB128  | 0,941754 | NaN      | <b>0,941754</b>  | 2143 | NaN  | <b>2143</b>   |
| CTIF     | 0,673333 | 1,210361 | <b>0,941847</b>  | 1565 | 1892 | <b>1728,5</b> |
| PPIL4    | 1,057934 | 0,826517 | <b>0,9422255</b> | 1818 | 2762 | <b>2290</b>   |
| BTN3A1   | 0,416488 | 1,467989 | <b>0,9422385</b> | 1351 | 1416 | <b>1383,5</b> |
| TRAF5    | 0,704265 | 1,180375 | <b>0,94232</b>   | 1484 | 2304 | <b>1894</b>   |
| TRIA1    | 0,734208 | 1,151221 | <b>0,9427145</b> | 1838 | 2191 | <b>2014,5</b> |
| TPT1     | 0,942719 | NaN      | <b>0,942719</b>  | 1808 | NaN  | <b>1808</b>   |
| G2E3     | 1,138413 | 0,747167 | <b>0,94279</b>   | 1898 | 2262 | <b>2080</b>   |
| GPR142   | 1,068898 | 0,817071 | <b>0,9429845</b> | 1866 | 1880 | <b>1873</b>   |
| PTTG1IP  | 1,311614 | 0,574424 | <b>0,943019</b>  | 2078 | 2014 | <b>2046</b>   |
| PEX14    | 1,252814 | 0,63326  | <b>0,943037</b>  | 1702 | 2497 | <b>2099,5</b> |
| NEK2     | 1,140075 | 0,746097 | <b>0,943086</b>  | 1828 | 2334 | <b>2081</b>   |
| INTS10   | 1,533791 | 0,352998 | <b>0,9433945</b> | 1639 | 2406 | <b>2022,5</b> |
| C8orf22  | 1,169182 | 0,717875 | <b>0,9435285</b> | 1739 | 2082 | <b>1910,5</b> |
| B4GALT2  | 0,600305 | 1,28769  | <b>0,9439975</b> | 1386 | 1840 | <b>1613</b>   |
| MARK3    | 0,642769 | 1,245282 | <b>0,9440255</b> | 1879 | 1857 | <b>1868</b>   |
| KIAA1751 | 1,368831 | 0,519456 | <b>0,9441435</b> | 1723 | 2038 | <b>1880,5</b> |
| ALDH1A2  | 1,138525 | 0,750572 | <b>0,9445485</b> | 1951 | 2035 | <b>1993</b>   |
| SLC7A3   | NaN      | 0,945193 | <b>0,945193</b>  | NaN  | 2599 | <b>2599</b>   |
| MAGED1   | 1,014887 | 0,875649 | <b>0,945268</b>  | 1775 | 2754 | <b>2264,5</b> |
| SEZ6L    | 1,425735 | 0,464845 | <b>0,94529</b>   | 1675 | 1738 | <b>1706,5</b> |
| MYO7A    | 1,401816 | 0,488796 | <b>0,945306</b>  | 1826 | 2417 | <b>2121,5</b> |
| STXBP6   | 0,258355 | 1,632799 | <b>0,945577</b>  | 1774 | 2137 | <b>1955,5</b> |
| SMARCD2  | -0,38234 | 2,273894 | <b>0,945777</b>  | 1433 | 1862 | <b>1647,5</b> |
| ANKRD46  | 1,012069 | 0,879492 | <b>0,9457805</b> | 1971 | 2207 | <b>2089</b>   |
| RMI1     | 0,945846 | NaN      | <b>0,945846</b>  | 1522 | NaN  | <b>1522</b>   |
| ZBED1    | 1,162746 | 0,729117 | <b>0,9459315</b> | 1779 | 2186 | <b>1982,5</b> |
| DOLK     | 1,478579 | 0,415683 | <b>0,947131</b>  | 1505 | 1714 | <b>1609,5</b> |
| ANAPC4   | 1,151253 | 0,743991 | <b>0,947622</b>  | 1811 | 2746 | <b>2278,5</b> |

|          |           |           |                  |      |      |               |
|----------|-----------|-----------|------------------|------|------|---------------|
| CNTNAP4  | 0,948138  | NaN       | <b>0,948138</b>  | 1851 | NaN  | <b>1851</b>   |
| HESX1    | 1,031723  | 0,864564  | <b>0,9481435</b> | 1505 | 1657 | <b>1581</b>   |
| MCCD1    | -0,095378 | 1,991762  | <b>0,948192</b>  | 1360 | 1675 | <b>1517,5</b> |
| SNAP23   | 0,239588  | 1,657321  | <b>0,9484545</b> | 2127 | 2330 | <b>2228,5</b> |
| GALE     | 1,045393  | 0,85199   | <b>0,9486915</b> | 1625 | 1863 | <b>1744</b>   |
| DNAJC13  | 1,080822  | 0,817533  | <b>0,9491775</b> | 1698 | 2303 | <b>2000,5</b> |
| TAF4B    | 1,107277  | 0,791097  | <b>0,949187</b>  | 1477 | 1767 | <b>1622</b>   |
| SLC10A7  | -0,103915 | 2,002374  | <b>0,9492295</b> | 1831 | 2521 | <b>2176</b>   |
| PDE4A    | 1,169247  | 0,730457  | <b>0,949852</b>  | 2183 | 2633 | <b>2408</b>   |
| IL3      | 1,37562   | 0,527439  | <b>0,9515295</b> | 1521 | 2111 | <b>1816</b>   |
| MYF6     | 1,057361  | 0,846104  | <b>0,9517325</b> | 1620 | 1866 | <b>1743</b>   |
| GNB1L    | 1,355782  | 0,548786  | <b>0,952284</b>  | 1449 | 1765 | <b>1607</b>   |
| MOCS1    | 1,82833   | 0,076363  | <b>0,9523465</b> | 1316 | 1703 | <b>1509,5</b> |
| DIXDC1   | 0,609868  | 1,296196  | <b>0,953032</b>  | 1497 | 2528 | <b>2012,5</b> |
| TCEAL2   | 1,613407  | 0,293869  | <b>0,953638</b>  | 1446 | 2604 | <b>2025</b>   |
| CEP192   | 0,156766  | 1,750862  | <b>0,953814</b>  | 910  | 1182 | <b>1046</b>   |
| DEFB118  | 0,831136  | 1,076678  | <b>0,953907</b>  | 1828 | 1784 | <b>1806</b>   |
| PSME1    | 1,542623  | 0,365399  | <b>0,954011</b>  | 1829 | 2003 | <b>1916</b>   |
| PROSER1  | 1,42343   | 0,485074  | <b>0,954252</b>  | 1582 | 2666 | <b>2124</b>   |
| ATP8B4   | 0,832265  | 1,076454  | <b>0,9543595</b> | 1818 | 1190 | <b>1504</b>   |
| PTGER1   | 0,954482  | NaN       | <b>0,954482</b>  | 693  | NaN  | <b>693</b>    |
| XRCC2    | 1,747404  | 0,16279   | <b>0,955097</b>  | 2245 | 1900 | <b>2072,5</b> |
| C17orf67 | 0,955185  | NaN       | <b>0,955185</b>  | 1928 | NaN  | <b>1928</b>   |
| IRF4     | 0,211159  | 1,699454  | <b>0,9553065</b> | 1541 | 1749 | <b>1645</b>   |
| ELF4     | 0,887101  | 1,024091  | <b>0,955596</b>  | 276  | 828  | <b>552</b>    |
| SLC22A24 | 1,111365  | 0,800069  | <b>0,955717</b>  | 2023 | 2337 | <b>2180</b>   |
| ASB11    | 2,152189  | -0,239404 | <b>0,9563925</b> | 2065 | 2918 | <b>2491,5</b> |
| CSN1S1   | 0,956988  | NaN       | <b>0,956988</b>  | 2108 | NaN  | <b>2108</b>   |
| MAML2    | 1,441379  | 0,472988  | <b>0,9571835</b> | 1654 | 2632 | <b>2143</b>   |
| OBFC2A   | 0,957764  | NaN       | <b>0,957764</b>  | 1933 | NaN  | <b>1933</b>   |
| TP53BP1  | 0,453245  | 1,462996  | <b>0,9581205</b> | 1880 | 1986 | <b>1933</b>   |
| ZNF561   | 0,958175  | NaN       | <b>0,958175</b>  | 2158 | NaN  | <b>2158</b>   |
| CXCR3    | 0,95833   | NaN       | <b>0,95833</b>   | 1838 | NaN  | <b>1838</b>   |
| VPS13B   | 0,042696  | 1,874681  | <b>0,9586885</b> | 1927 | 3179 | <b>2553</b>   |

|         |          |           |                  |      |      |               |
|---------|----------|-----------|------------------|------|------|---------------|
| SRPK2   | 0,883548 | 1,034175  | <b>0,9588615</b> | 1918 | 2278 | <b>2098</b>   |
| GAL3ST4 | 1,36506  | 0,553198  | <b>0,959129</b>  | 780  | 1700 | <b>1240</b>   |
| MRPL40  | 1,051775 | 0,867022  | <b>0,9593985</b> | 1312 | 1796 | <b>1554</b>   |
| JMJD5   | 0,959874 | NaN       | <b>0,959874</b>  | 1189 | NaN  | <b>1189</b>   |
| VPS4B   | 1,309047 | 0,610752  | <b>0,9598995</b> | 1637 | 1957 | <b>1797</b>   |
| ZNF236  | 1,353579 | 0,566442  | <b>0,9600105</b> | 1451 | 2214 | <b>1832,5</b> |
| RALY    | 0,808227 | 1,112762  | <b>0,9604945</b> | 1109 | 1220 | <b>1164,5</b> |
| FEM1A   | 0,820653 | 1,101254  | <b>0,9609535</b> | 1663 | 2467 | <b>2065</b>   |
| MYO5C   | 0,350192 | 1,572558  | <b>0,961375</b>  | 1271 | 1768 | <b>1519,5</b> |
| CYB5B   | 0,961459 | NaN       | <b>0,961459</b>  | 1655 | NaN  | <b>1655</b>   |
| CCDC37  | 0,656524 | 1,266419  | <b>0,9614715</b> | 1561 | 1943 | <b>1752</b>   |
| ERP27   | 0,961623 | NaN       | <b>0,961623</b>  | 1296 | NaN  | <b>1296</b>   |
| TMEM79  | 0,804314 | 1,119059  | <b>0,9616865</b> | 1957 | 3065 | <b>2511</b>   |
| RAPH1   | 0,962368 | NaN       | <b>0,962368</b>  | 1655 | NaN  | <b>1655</b>   |
| BAHD1   | 1,951022 | -0,025829 | <b>0,9625965</b> | 1316 | 2595 | <b>1955,5</b> |
| NCLN    | 1,744812 | 0,181123  | <b>0,9629675</b> | 1901 | 2090 | <b>1995,5</b> |
| RFC2    | 1,111643 | 0,814506  | <b>0,9630745</b> | 1510 | 2423 | <b>1966,5</b> |
| MAF1    | 1,117844 | 0,808615  | <b>0,9632295</b> | 1565 | 2252 | <b>1908,5</b> |
| ZNF582  | 0,156669 | 1,771453  | <b>0,964061</b>  | 1856 | 2454 | <b>2155</b>   |
| CD99L2  | 0,964264 | NaN       | <b>0,964264</b>  | 1644 | NaN  | <b>1644</b>   |
| GUCY2F  | 0,812887 | 1,115821  | <b>0,964354</b>  | 1749 | 2538 | <b>2143,5</b> |
| EMILIN3 | 0,749503 | 1,179207  | <b>0,964355</b>  | 1038 | 1682 | <b>1360</b>   |
| SP8     | 0,896405 | 1,032863  | <b>0,964634</b>  | 1360 | 1844 | <b>1602</b>   |
| ACTBL2  | 0,822799 | 1,107998  | <b>0,9653985</b> | 2145 | 2377 | <b>2261</b>   |
| SLC4A7  | 1,01931  | 0,911858  | <b>0,965584</b>  | 1134 | 1850 | <b>1492</b>   |
| TRAFD1  | 0,801642 | 1,12965   | <b>0,965646</b>  | 1512 | 1958 | <b>1735</b>   |
| CSMD1   | 0,965941 | NaN       | <b>0,965941</b>  | 1692 | NaN  | <b>1692</b>   |
| OR6C3   | 0,966564 | NaN       | <b>0,966564</b>  | 1413 | NaN  | <b>1413</b>   |
| 11-sept | 1,90792  | 0,025843  | <b>0,9668815</b> | 1915 | 2319 | <b>2117</b>   |
| LYRM5   | 1,252087 | 0,682802  | <b>0,9674445</b> | 2158 | 2368 | <b>2263</b>   |
| FAM81A  | 0,967532 | NaN       | <b>0,967532</b>  | 1742 | NaN  | <b>1742</b>   |
| KRTDAP  | 1,221559 | 0,713734  | <b>0,9676465</b> | 1648 | 1353 | <b>1500,5</b> |
| IGFALS  | 0,956583 | 0,978989  | <b>0,967786</b>  | 1472 | 1567 | <b>1519,5</b> |
| NOS1AP  | 1,547119 | 0,388991  | <b>0,968055</b>  | 1085 | 1633 | <b>1359</b>   |

|          |          |          |                  |      |      |               |
|----------|----------|----------|------------------|------|------|---------------|
| MLH1     | 0,77422  | 1,16212  | <b>0,96817</b>   | 1937 | 2613 | <b>2275</b>   |
| PDE7A    | 0,396992 | 1,539631 | <b>0,9683115</b> | 1602 | 2671 | <b>2136,5</b> |
| TNF      | 0,543328 | 1,393386 | <b>0,968357</b>  | 1660 | 2224 | <b>1942</b>   |
| ZSCAN5B  | 0,968577 | NaN      | <b>0,968577</b>  | 1140 | NaN  | <b>1140</b>   |
| TAGAP    | 1,356888 | 0,580682 | <b>0,968785</b>  | 1278 | 1818 | <b>1548</b>   |
| FICD     | 0,924076 | 1,013693 | <b>0,9688845</b> | 1834 | 1677 | <b>1755,5</b> |
| STRN4    | 0,969005 | NaN      | <b>0,969005</b>  | 1869 | NaN  | <b>1869</b>   |
| AKAP10   | 1,195896 | 0,742374 | <b>0,969135</b>  | 1926 | 2478 | <b>2202</b>   |
| DDO      | 0,771148 | 1,167195 | <b>0,9691715</b> | 1777 | 1594 | <b>1685,5</b> |
| METTL21C | 0,783392 | 1,154994 | <b>0,969193</b>  | 1665 | 2014 | <b>1839,5</b> |
| F2RL2    | 0,970086 | NaN      | <b>0,970086</b>  | 1832 | NaN  | <b>1832</b>   |
| MXRA7    | 0,446582 | 1,493643 | <b>0,9701125</b> | 1622 | 1782 | <b>1702</b>   |
| TNFRSF21 | 0,538179 | 1,403428 | <b>0,9708035</b> | 1760 | 2025 | <b>1892,5</b> |
| PPCDC    | NaN      | 0,970868 | <b>0,970868</b>  | NaN  | 1909 | <b>1909</b>   |
| CCBP2    | 0,971547 | NaN      | <b>0,971547</b>  | 1825 | NaN  | <b>1825</b>   |
| DSE      | 0,971577 | NaN      | <b>0,971577</b>  | 1745 | NaN  | <b>1745</b>   |
| PLEKHG5  | 0,971867 | NaN      | <b>0,971867</b>  | 2048 | NaN  | <b>2048</b>   |
| HBEGF    | 1,832709 | 0,112359 | <b>0,972534</b>  | 1507 | 1914 | <b>1710,5</b> |
| DAGLA    | 0,972728 | NaN      | <b>0,972728</b>  | 1378 | NaN  | <b>1378</b>   |
| TIAM1    | 1,332927 | 0,612945 | <b>0,972936</b>  | 1566 | 2127 | <b>1846,5</b> |
| OR13J1   | 1,244166 | 0,701714 | <b>0,97294</b>   | 1395 | 2107 | <b>1751</b>   |
| ENO2     | 1,765299 | 0,183491 | <b>0,974395</b>  | 1424 | 1231 | <b>1327,5</b> |
| BFSP1    | 0,974636 | NaN      | <b>0,974636</b>  | 1244 | NaN  | <b>1244</b>   |
| DDC      | 0,437714 | 1,511902 | <b>0,974808</b>  | 1699 | 3074 | <b>2386,5</b> |
| SIX1     | 0,858355 | 1,091791 | <b>0,975073</b>  | 1866 | 2434 | <b>2150</b>   |
| EMR4P    | 0,97545  | NaN      | <b>0,97545</b>   | 1829 | NaN  | <b>1829</b>   |
| CCR9     | 0,975918 | NaN      | <b>0,975918</b>  | 1479 | NaN  | <b>1479</b>   |
| ZMYND8   | NaN      | 0,975945 | <b>0,975945</b>  | NaN  | 1867 | <b>1867</b>   |
| DRD1     | 0,976077 | NaN      | <b>0,976077</b>  | 1469 | NaN  | <b>1469</b>   |
| NTS      | 1,279646 | 0,67265  | <b>0,976148</b>  | 1693 | 2012 | <b>1852,5</b> |
| FBXO22   | 1,839623 | 0,112777 | <b>0,9762</b>    | 1679 | 2639 | <b>2159</b>   |
| CD1E     | 0,770633 | 1,181961 | <b>0,976297</b>  | 1607 | 1913 | <b>1760</b>   |
| NDUFS5   | 1,328251 | 0,624392 | <b>0,9763215</b> | 1825 | 1934 | <b>1879,5</b> |
| FAM47C   | 1,097569 | 0,855107 | <b>0,976338</b>  | 1368 | 1754 | <b>1561</b>   |

|           |          |           |                  |      |      |               |
|-----------|----------|-----------|------------------|------|------|---------------|
| OPN1SW    | 0,169335 | 1,783979  | <b>0,976657</b>  | 856  | 991  | <b>923,5</b>  |
| PTPN11    | 1,143229 | 0,81039   | <b>0,9768095</b> | 1659 | 2134 | <b>1896,5</b> |
| C14orf149 | 0,499972 | 1,454566  | <b>0,977269</b>  | 1837 | 1613 | <b>1725</b>   |
| PCDHB16   | 1,151572 | 0,802969  | <b>0,9772705</b> | 1848 | 2481 | <b>2164,5</b> |
| IGDCC4    | 1,619572 | 0,335923  | <b>0,9777475</b> | 1486 | 1862 | <b>1674</b>   |
| MAP3K1    | 1,656579 | 0,299098  | <b>0,9778385</b> | 1700 | 2434 | <b>2067</b>   |
| IRF5      | 0,685359 | 1,270396  | <b>0,9778775</b> | 1157 | 1652 | <b>1404,5</b> |
| CRYGB     | 1,411436 | 0,544835  | <b>0,9781355</b> | 1499 | 1901 | <b>1700</b>   |
| IL11RA    | 0,802365 | 1,153968  | <b>0,9781665</b> | 1544 | 1826 | <b>1685</b>   |
| ENKUR     | 0,982298 | 0,975825  | <b>0,9790615</b> | 1902 | 2891 | <b>2396,5</b> |
| ZC3H6     | 0,979268 | NaN       | <b>0,979268</b>  | 1718 | NaN  | <b>1718</b>   |
| RSF1      | 1,30789  | 0,65077   | <b>0,97933</b>   | 1275 | 1648 | <b>1461,5</b> |
| CDC5L     | 0,278974 | 1,680082  | <b>0,979528</b>  | 906  | 666  | <b>786</b>    |
| HNRNPU    | 1,125308 | 0,834379  | <b>0,9798435</b> | 1686 | 1920 | <b>1803</b>   |
| SNTN      | 0,980357 | NaN       | <b>0,980357</b>  | 1759 | NaN  | <b>1759</b>   |
| KITLG     | 1,697409 | 0,263865  | <b>0,980637</b>  | 1254 | 2530 | <b>1892</b>   |
| HTN1      | 0,698919 | 1,262654  | <b>0,9807865</b> | 1811 | 2036 | <b>1923,5</b> |
| KRBA1     | 0,980922 | NaN       | <b>0,980922</b>  | 1292 | NaN  | <b>1292</b>   |
| CEP97     | 1,635135 | 0,327134  | <b>0,9811345</b> | 1962 | 1940 | <b>1951</b>   |
| RELA      | 0,438613 | 1,523807  | <b>0,98121</b>   | 1825 | 1937 | <b>1881</b>   |
| ADAM23    | 0,999525 | 0,962923  | <b>0,981224</b>  | 2006 | 2347 | <b>2176,5</b> |
| PROZ      | 1,995905 | -0,032752 | <b>0,9815765</b> | 1457 | 2068 | <b>1762,5</b> |
| GSDMD     | 1,495821 | 0,468479  | <b>0,98215</b>   | 1512 | 1418 | <b>1465</b>   |
| BHLHA15   | 0,637866 | 1,327882  | <b>0,982874</b>  | 1541 | 2198 | <b>1869,5</b> |
| MAP4K5    | 1,257979 | 0,709013  | <b>0,983496</b>  | 1742 | 1997 | <b>1869,5</b> |
| GLI1      | 1,387074 | 0,580629  | <b>0,9838515</b> | 1649 | 1751 | <b>1700</b>   |
| C9orf50   | 0,984344 | NaN       | <b>0,984344</b>  | 2214 | NaN  | <b>2214</b>   |
| C10orf10  | 0,26357  | 1,705153  | <b>0,9843615</b> | 1023 | 1514 | <b>1268,5</b> |
| SPRYD3    | 0,984888 | NaN       | <b>0,984888</b>  | 1606 | NaN  | <b>1606</b>   |
| AIDA      | 1,046233 | 0,923585  | <b>0,984909</b>  | 1060 | 1663 | <b>1361,5</b> |
| TAC3      | NaN      | 0,985018  | <b>0,985018</b>  | NaN  | 2184 | <b>2184</b>   |
| ASPN      | 0,680207 | 1,290699  | <b>0,985453</b>  | 1878 | 2138 | <b>2008</b>   |
| ZNF696    | 0,84677  | 1,124618  | <b>0,985694</b>  | 1628 | 2781 | <b>2204,5</b> |
| S100G     | 0,986268 | NaN       | <b>0,986268</b>  | 1658 | NaN  | <b>1658</b>   |

|          |           |          |                  |      |      |               |
|----------|-----------|----------|------------------|------|------|---------------|
| GRK4     | 0,780803  | 1,192398 | <b>0,9866005</b> | 905  | 1681 | <b>1293</b>   |
| CCDC36   | 0,98666   | NaN      | <b>0,98666</b>   | 2096 | NaN  | <b>2096</b>   |
| C6orf192 | 1,187796  | 0,786233 | <b>0,9870145</b> | 1820 | 2194 | <b>2007</b>   |
| C5orf64  | 0,860453  | 1,113717 | <b>0,987085</b>  | 1990 | 2071 | <b>2030,5</b> |
| RPS23    | 0,96238   | 1,0119   | <b>0,98714</b>   | 1311 | 1608 | <b>1459,5</b> |
| NR2F6    | 1,090531  | 0,884353 | <b>0,987442</b>  | 1076 | 2354 | <b>1715</b>   |
| MRGPRX3  | 0,987605  | NaN      | <b>0,987605</b>  | 2032 | NaN  | <b>2032</b>   |
| TLL2     | 0,528696  | 1,446886 | <b>0,987791</b>  | 2142 | 2099 | <b>2120,5</b> |
| FCN1     | 1,300118  | 0,675703 | <b>0,9879105</b> | 1632 | 2355 | <b>1993,5</b> |
| DAK      | 1,408987  | 0,567344 | <b>0,9881655</b> | 1617 | 2341 | <b>1979</b>   |
| CCDC68   | 1,62701   | 0,349422 | <b>0,988216</b>  | 1875 | 2152 | <b>2013,5</b> |
| TRPM8    | 1,511001  | 0,46716  | <b>0,9890805</b> | 1126 | 1897 | <b>1511,5</b> |
| PRKAB1   | 1,127369  | 0,851111 | <b>0,98924</b>   | 1493 | 2012 | <b>1752,5</b> |
| HTR2A    | 0,989494  | NaN      | <b>0,989494</b>  | 1872 | NaN  | <b>1872</b>   |
| FAM46B   | 0,63859   | 1,341121 | <b>0,9898555</b> | 1511 | 1790 | <b>1650,5</b> |
| C7orf30  | 0,632412  | 1,347455 | <b>0,9899335</b> | 1810 | 2423 | <b>2116,5</b> |
| RAB27A   | 0,9458    | 1,034259 | <b>0,9900295</b> | 1161 | 1731 | <b>1446</b>   |
| RNF11    | 0,649853  | 1,330303 | <b>0,990078</b>  | 1743 | 2394 | <b>2068,5</b> |
| NPFFR1   | 0,990101  | NaN      | <b>0,990101</b>  | 1511 | NaN  | <b>1511</b>   |
| BRS3     | 0,943538  | 1,038901 | <b>0,9912195</b> | 1564 | 2107 | <b>1835,5</b> |
| IL23A    | 0,922447  | 1,060238 | <b>0,9913425</b> | 2137 | 1965 | <b>2051</b>   |
| DDX54    | 1,115753  | 0,867199 | <b>0,991476</b>  | 1511 | 1801 | <b>1656</b>   |
| PEX11A   | 0,991504  | NaN      | <b>0,991504</b>  | 1724 | NaN  | <b>1724</b>   |
| E2F1     | 0,924099  | 1,058934 | <b>0,9915165</b> | 1467 | 1809 | <b>1638</b>   |
| USP26    | 0,527902  | 1,455215 | <b>0,9915585</b> | 2070 | 2486 | <b>2278</b>   |
| MAST2    | 1,053571  | 0,92975  | <b>0,9916605</b> | 1231 | 1866 | <b>1548,5</b> |
| ZSWIM1   | 1,253627  | 0,730818 | <b>0,9922225</b> | 1639 | 1708 | <b>1673,5</b> |
| HOXB2    | 1,265566  | 0,718924 | <b>0,992245</b>  | 1347 | 2037 | <b>1692</b>   |
| OLIG3    | 1,409343  | 0,575292 | <b>0,9923175</b> | 1433 | 2189 | <b>1811</b>   |
| GTPBP3   | -0,121644 | 2,106508 | <b>0,992432</b>  | 1557 | 2162 | <b>1859,5</b> |
| NEUROD2  | 1,036341  | 0,950287 | <b>0,993314</b>  | 1348 | 1678 | <b>1513</b>   |
| LAMA2    | 0,226288  | 1,761294 | <b>0,993791</b>  | 1536 | 1967 | <b>1751,5</b> |
| TULP2    | 1,396055  | 0,591976 | <b>0,9940155</b> | 1473 | 1807 | <b>1640</b>   |
| MCM4     | 0,311643  | 1,677264 | <b>0,9944535</b> | 1275 | 2388 | <b>1831,5</b> |

|           |          |           |                  |      |      |               |
|-----------|----------|-----------|------------------|------|------|---------------|
| ZNF596    | 1,167352 | 0,821954  | <b>0,994653</b>  | 1698 | 2505 | <b>2101,5</b> |
| FAM120C   | 0,994841 | NaN       | <b>0,994841</b>  | 1510 | NaN  | <b>1510</b>   |
| MAST1     | 1,392398 | 0,599351  | <b>0,9958745</b> | 1220 | 1590 | <b>1405</b>   |
| LPIN1     | 0,063388 | 1,928939  | <b>0,9961635</b> | 1457 | 1444 | <b>1450,5</b> |
| OR2G6     | 0,996366 | NaN       | <b>0,996366</b>  | 1802 | NaN  | <b>1802</b>   |
| TXN2      | 2,168576 | -0,175802 | <b>0,996387</b>  | 1667 | 2287 | <b>1977</b>   |
| ABCA3     | 1,106205 | 0,887668  | <b>0,9969365</b> | 1573 | 1794 | <b>1683,5</b> |
| MRPS27    | 0,495066 | 1,499578  | <b>0,997322</b>  | 1633 | 1956 | <b>1794,5</b> |
| PPP3CA    | 1,111866 | 0,883386  | <b>0,997626</b>  | 1199 | 1826 | <b>1512,5</b> |
| TOMM34    | 1,442507 | 0,552872  | <b>0,9976895</b> | 1822 | 1862 | <b>1842</b>   |
| GJA10     | 1,216671 | 0,779505  | <b>0,998088</b>  | 1090 | 1961 | <b>1525,5</b> |
| PRIMA1    | 1,352384 | 0,644082  | <b>0,998233</b>  | 1777 | 2145 | <b>1961</b>   |
| EDC4      | 0,998625 | NaN       | <b>0,998625</b>  | 1463 | NaN  | <b>1463</b>   |
| PLSCR4    | 0,06869  | 1,92898   | <b>0,998835</b>  | 1586 | 2086 | <b>1836</b>   |
| SMARCE1   | 0,798119 | 1,199761  | <b>0,99894</b>   | 1808 | 2490 | <b>2149</b>   |
| ILF2      | 0,782062 | 1,215935  | <b>0,9989985</b> | 1782 | 1822 | <b>1802</b>   |
| GMEB1     | 1,326024 | 0,67206   | <b>0,999042</b>  | 1660 | 2128 | <b>1894</b>   |
| CCDC129   | 0,999076 | NaN       | <b>0,999076</b>  | 1777 | NaN  | <b>1777</b>   |
| NUPL1     | 0,999127 | NaN       | <b>0,999127</b>  | 986  | NaN  | <b>986</b>    |
| ST3GAL4   | 0,844705 | 1,153743  | <b>0,999224</b>  | 1268 | 2079 | <b>1673,5</b> |
| RLBP1     | 0,956302 | 1,042304  | <b>0,999303</b>  | 1739 | 2076 | <b>1907,5</b> |
| TFF2      | 1,412336 | 0,586462  | <b>0,999399</b>  | 1919 | 2306 | <b>2112,5</b> |
| PDGFA     | 1,357487 | 0,641939  | <b>0,999713</b>  | 1477 | 1802 | <b>1639,5</b> |
| MNAT1     | 0,917475 | 1,085814  | <b>1,0016445</b> | 1431 | 1968 | <b>1699,5</b> |
| MSH2      | NaN      | 1,001752  | <b>1,001752</b>  | NaN  | 3017 | <b>3017</b>   |
| NGF       | 1,53668  | 0,467491  | <b>1,0020855</b> | 534  | 1285 | <b>909,5</b>  |
| CCM2      | 1,002528 | NaN       | <b>1,002528</b>  | 1210 | NaN  | <b>1210</b>   |
| SLC35F1   | 1,002895 | NaN       | <b>1,002895</b>  | 1192 | NaN  | <b>1192</b>   |
| C20orf112 | 1,193459 | 0,813752  | <b>1,0036055</b> | 1866 | 1979 | <b>1922,5</b> |
| TMEM177   | 0,664968 | 1,344885  | <b>1,0049265</b> | 1407 | 1717 | <b>1562</b>   |
| CWC25     | 0,266387 | 1,743846  | <b>1,0051165</b> | 1339 | 2381 | <b>1860</b>   |
| KRT9      | 2,086435 | -0,075214 | <b>1,0056105</b> | 1635 | 1892 | <b>1763,5</b> |
| SPTBN4    | 1,143768 | 0,867647  | <b>1,0057075</b> | 1421 | 2710 | <b>2065,5</b> |
| IL25      | 0,556628 | 1,456124  | <b>1,006376</b>  | 1278 | 2068 | <b>1673</b>   |



|          |          |           |                  |      |      |               |
|----------|----------|-----------|------------------|------|------|---------------|
| ZXDB     | 0,797053 | 1,215768  | <b>1,0064105</b> | 1864 | 2055 | <b>1959,5</b> |
| TPPP3    | 1,006618 | NaN       | <b>1,006618</b>  | 1761 | NaN  | <b>1761</b>   |
| C8orf34  | 1,504845 | 0,50861   | <b>1,0067275</b> | 1751 | 2032 | <b>1891,5</b> |
| RNF175   | 1,049795 | 0,963759  | <b>1,006777</b>  | 1273 | 1656 | <b>1464,5</b> |
| HIST1H1T | 0,580632 | 1,432944  | <b>1,006788</b>  | 2078 | 2116 | <b>2097</b>   |
| NLRP7    | 1,264551 | 0,749072  | <b>1,0068115</b> | 1863 | 2104 | <b>1983,5</b> |
| ZNF691   | 1,0069   | NaN       | <b>1,0069</b>    | 1386 | NaN  | <b>1386</b>   |
| MOGAT2   | 1,681985 | 0,332012  | <b>1,0069985</b> | 1724 | 1710 | <b>1717</b>   |
| HMGNS    | 1,389791 | 0,62435   | <b>1,0070705</b> | 2109 | 2217 | <b>2163</b>   |
| CAPNS2   | 1,436518 | 0,577988  | <b>1,007253</b>  | 1419 | 2192 | <b>1805,5</b> |
| LARP4B   | 1,007308 | NaN       | <b>1,007308</b>  | 1697 | NaN  | <b>1697</b>   |
| ASPM     | 1,344154 | 0,670534  | <b>1,007344</b>  | 1686 | 1790 | <b>1738</b>   |
| METAP1   | 0,80208  | 1,213246  | <b>1,007663</b>  | 2383 | 2301 | <b>2342</b>   |
| C19orf23 | 1,00794  | NaN       | <b>1,00794</b>   | 1582 | NaN  | <b>1582</b>   |
| RARS     | 1,651114 | 0,365002  | <b>1,008058</b>  | 1558 | 2352 | <b>1955</b>   |
| CAMK4    | 2,215676 | -0,199046 | <b>1,008315</b>  | 1881 | 2189 | <b>2035</b>   |
| RIPPLY2  | 0,647367 | 1,370206  | <b>1,0087865</b> | 1503 | 1394 | <b>1448,5</b> |
| ENPP4    | 1,430983 | 0,58706   | <b>1,0090215</b> | 1324 | 1306 | <b>1315</b>   |
| NBR1     | 0,839862 | 1,178361  | <b>1,0091115</b> | 1491 | 1929 | <b>1710</b>   |
| TPRG1L   | 0,757457 | 1,26077   | <b>1,0091135</b> | 1468 | 2315 | <b>1891,5</b> |
| AEBP1    | 2,446352 | -0,426962 | <b>1,009695</b>  | 736  | 1596 | <b>1166</b>   |
| KAT6B    | 0,660171 | 1,359594  | <b>1,0098825</b> | 1065 | 1471 | <b>1268</b>   |
| TMPPRSS3 | 1,12437  | 0,895417  | <b>1,0098935</b> | 1716 | 2433 | <b>2074,5</b> |
| SORBS3   | 0,720222 | 1,299575  | <b>1,0098985</b> | 1190 | 1636 | <b>1413</b>   |
| KIAA1586 | 1,009997 | NaN       | <b>1,009997</b>  | 1653 | NaN  | <b>1653</b>   |
| ZNF614   | 1,375308 | 0,645031  | <b>1,0101695</b> | 1748 | 2060 | <b>1904</b>   |
| ZCCHC2   | 1,029149 | 0,991447  | <b>1,010298</b>  | 1185 | 2315 | <b>1750</b>   |
| LYPD2    | 2,097522 | -0,076568 | <b>1,010477</b>  | 1707 | 2461 | <b>2084</b>   |
| CASK     | 0,567187 | 1,455181  | <b>1,011184</b>  | 2208 | 2226 | <b>2217</b>   |
| HAO1     | 1,357679 | 0,664713  | <b>1,011196</b>  | 1828 | 1831 | <b>1829,5</b> |
| PSME4    | 1,322803 | 0,699596  | <b>1,0111995</b> | 1525 | 1860 | <b>1692,5</b> |
| LAS1L    | 0,759212 | 1,263426  | <b>1,011319</b>  | 1592 | 1873 | <b>1732,5</b> |
| HEMK1    | 1,124948 | 0,898015  | <b>1,0114815</b> | 1248 | 1825 | <b>1536,5</b> |
| KLHL22   | 1,303744 | 0,720107  | <b>1,0119255</b> | 1804 | 2188 | <b>1996</b>   |

|           |           |          |                  |      |      |               |
|-----------|-----------|----------|------------------|------|------|---------------|
| COBRA1    | 1,560261  | 0,464152 | <b>1,0122065</b> | 1447 | 2074 | <b>1760,5</b> |
| BTF3L4    | 1,353845  | 0,670671 | <b>1,012258</b>  | 1944 | 1854 | <b>1899</b>   |
| TFR2      | 1,085894  | 0,941191 | <b>1,0135425</b> | 1279 | 2123 | <b>1701</b>   |
| RNF7      | -0,349571 | 2,376693 | <b>1,013561</b>  | 1183 | 2552 | <b>1867,5</b> |
| NLRP11    | 0,060769  | 1,966438 | <b>1,0136035</b> | 1258 | 1760 | <b>1509</b>   |
| ACTRT1    | 1,327064  | 0,700448 | <b>1,013756</b>  | 1797 | 1778 | <b>1787,5</b> |
| PDZRN3    | 1,814083  | 0,213899 | <b>1,013991</b>  | 1841 | 2803 | <b>2322</b>   |
| ESCO2     | 1,014115  | NaN      | <b>1,014115</b>  | 1433 | NaN  | <b>1433</b>   |
| MRPL35    | 0,646739  | 1,381717 | <b>1,014228</b>  | 1480 | 1893 | <b>1686,5</b> |
| C20orf85  | 0,569206  | 1,460399 | <b>1,0148025</b> | 1178 | 1213 | <b>1195,5</b> |
| RARRES2   | 0,52335   | 1,506556 | <b>1,014953</b>  | 1832 | 1707 | <b>1769,5</b> |
| C2orf62   | 1,200695  | 0,829518 | <b>1,0151065</b> | 1666 | 2231 | <b>1948,5</b> |
| LRRC14    | 1,106467  | 0,92425  | <b>1,0153585</b> | 1931 | 2065 | <b>1998</b>   |
| FAM63A    | 1,017684  | 1,014679 | <b>1,0161815</b> | 1802 | 2061 | <b>1931,5</b> |
| CCDC144NL | 1,352467  | 0,680519 | <b>1,016493</b>  | 1883 | 2740 | <b>2311,5</b> |
| MYLK4     | 0,259753  | 1,773487 | <b>1,01662</b>   | 2074 | 1647 | <b>1860,5</b> |
| OR2A25    | 1,016752  | NaN      | <b>1,016752</b>  | 1509 | NaN  | <b>1509</b>   |
| ATF3      | 0,582128  | 1,451414 | <b>1,016771</b>  | 1731 | 2618 | <b>2174,5</b> |
| CBR4      | 0,536748  | 1,496934 | <b>1,016841</b>  | 1208 | 1804 | <b>1506</b>   |
| SPIN4     | 0,959183  | 1,075141 | <b>1,017162</b>  | 1535 | 1960 | <b>1747,5</b> |
| SLC25A21  | 1,017882  | NaN      | <b>1,017882</b>  | 1953 | NaN  | <b>1953</b>   |
| PPP4R4    | 0,77944   | 1,257827 | <b>1,0186335</b> | 1969 | 2661 | <b>2315</b>   |
| QKI       | 1,437047  | 0,600407 | <b>1,018727</b>  | 1842 | 2111 | <b>1976,5</b> |
| KCNK6     | 0,810562  | 1,227468 | <b>1,019015</b>  | 1626 | 2709 | <b>2167,5</b> |
| OR6F1     | 0,721656  | 1,317773 | <b>1,0197145</b> | 1144 | 1695 | <b>1419,5</b> |
| ZNF137P   | 1,65782   | 0,381786 | <b>1,019803</b>  | 1597 | 1697 | <b>1647</b>   |
| PPP2R3B   | 1,482077  | 0,557538 | <b>1,0198075</b> | 1778 | 2223 | <b>2000,5</b> |
| RPL3L     | 1,019919  | NaN      | <b>1,019919</b>  | 1439 | NaN  | <b>1439</b>   |
| SPSB4     | 1,428551  | 0,611825 | <b>1,020188</b>  | 1083 | 1896 | <b>1489,5</b> |
| ZNF311    | 1,076143  | 0,964569 | <b>1,020356</b>  | 1715 | 2072 | <b>1893,5</b> |
| OR6C76    | 1,128894  | 0,912102 | <b>1,020498</b>  | 1640 | 1920 | <b>1780</b>   |
| PPM1A     | 1,479252  | 0,562409 | <b>1,0208305</b> | 1685 | 2056 | <b>1870,5</b> |
| EIF4E3    | 0,551702  | 1,490738 | <b>1,02122</b>   | 1737 | 1986 | <b>1861,5</b> |
| C20orf3   | 0,228823  | 1,813697 | <b>1,02126</b>   | 1402 | 1747 | <b>1574,5</b> |

|          |           |           |                  |      |      |               |
|----------|-----------|-----------|------------------|------|------|---------------|
| ST8SIA4  | 1,486833  | 0,555873  | <b>1,021353</b>  | 1920 | 2227 | <b>2073,5</b> |
| TNFAIP1  | 0,237245  | 1,806354  | <b>1,0217995</b> | 1727 | 2180 | <b>1953,5</b> |
| FLCN     | 1,022658  | NaN       | <b>1,022658</b>  | 1625 | NaN  | <b>1625</b>   |
| CREB3    | 1,190746  | 0,854783  | <b>1,0227645</b> | 1819 | 1836 | <b>1827,5</b> |
| SNUPN    | 1,231319  | 0,814579  | <b>1,022949</b>  | 1989 | 2858 | <b>2423,5</b> |
| EIF2B2   | 0,543449  | 1,502579  | <b>1,023014</b>  | 575  | 1822 | <b>1198,5</b> |
| SLC35A2  | 1,46115   | 0,585103  | <b>1,0231265</b> | 1629 | 2023 | <b>1826</b>   |
| BCL11A   | 1,124973  | 0,9215    | <b>1,0232365</b> | 1835 | 2104 | <b>1969,5</b> |
| SLC22A14 | 0,201945  | 1,844547  | <b>1,023246</b>  | 1684 | 2795 | <b>2239,5</b> |
| FAM125B  | 1,024222  | NaN       | <b>1,024222</b>  | 1482 | NaN  | <b>1482</b>   |
| ZNF69    | 1,024322  | NaN       | <b>1,024322</b>  | 1115 | NaN  | <b>1115</b>   |
| TSC22D3  | 1,025386  | NaN       | <b>1,025386</b>  | 1569 | NaN  | <b>1569</b>   |
| PAFAH1B1 | 1,416375  | 0,635064  | <b>1,0257195</b> | 1564 | 2295 | <b>1929,5</b> |
| BAZ2B    | 0,322733  | 1,728925  | <b>1,025829</b>  | 1960 | 2423 | <b>2191,5</b> |
| IRF2BP2  | 0,71642   | 1,336194  | <b>1,026307</b>  | 1900 | 1963 | <b>1931,5</b> |
| VEGFA    | 0,758636  | 1,294302  | <b>1,026469</b>  | 1426 | 2217 | <b>1821,5</b> |
| FABP7    | 2,622663  | -0,56911  | <b>1,0267765</b> | 968  | 1783 | <b>1375,5</b> |
| LBP      | -0,168767 | 2,222804  | <b>1,0270185</b> | 1363 | 1961 | <b>1662</b>   |
| TFAP2E   | 1,027049  | NaN       | <b>1,027049</b>  | 1537 | NaN  | <b>1537</b>   |
| C6orf72  | 0,948104  | 1,106054  | <b>1,027079</b>  | 1658 | 2200 | <b>1929</b>   |
| SYNGR3   | 0,957965  | 1,096299  | <b>1,027132</b>  | 1374 | 2008 | <b>1691</b>   |
| BTBD11   | 1,0625    | 0,994107  | <b>1,0283035</b> | 1929 | 1875 | <b>1902</b>   |
| EHHADH   | NaN       | 1,028698  | <b>1,028698</b>  | NaN  | 2479 | <b>2479</b>   |
| RNASEH1  | 1,552765  | 0,504688  | <b>1,0287265</b> | 1817 | 2754 | <b>2285,5</b> |
| SLC12A5  | 1,331     | 0,726531  | <b>1,0287655</b> | 2053 | 2151 | <b>2102</b>   |
| METTL18  | 1,02886   | NaN       | <b>1,02886</b>   | 1637 | NaN  | <b>1637</b>   |
| IFNA2    | 1,0973    | 0,960954  | <b>1,029127</b>  | 1691 | 2289 | <b>1990</b>   |
| LELP1    | 2,157009  | -0,098505 | <b>1,029252</b>  | 1659 | 1525 | <b>1592</b>   |
| HOXC12   | 0,451507  | 1,607617  | <b>1,029562</b>  | 1606 | 1753 | <b>1679,5</b> |
| TRA2A    | 1,009054  | 1,051092  | <b>1,030073</b>  | 1211 | 2200 | <b>1705,5</b> |
| MYH1     | 1,220832  | 0,839336  | <b>1,030084</b>  | 1422 | 1960 | <b>1691</b>   |
| SHMT2    | 1,835032  | 0,225815  | <b>1,0304235</b> | 1622 | 1948 | <b>1785</b>   |
| DPEP2    | 1,500265  | 0,560623  | <b>1,030444</b>  | 2035 | 2231 | <b>2133</b>   |
| SLC26A11 | NaN       | 1,030539  | <b>1,030539</b>  | NaN  | 2199 | <b>2199</b>   |

|          |           |           |                  |      |      |               |
|----------|-----------|-----------|------------------|------|------|---------------|
| RAB11A   | 0,978981  | 1,082996  | <b>1,0309885</b> | 1408 | 1683 | <b>1545,5</b> |
| LMBRD2   | 1,031158  | NaN       | <b>1,031158</b>  | 2048 | NaN  | <b>2048</b>   |
| PURA     | 1,356829  | 0,705704  | <b>1,0312665</b> | 1834 | 2289 | <b>2061,5</b> |
| TIGD2    | 0,89287   | 1,169992  | <b>1,031431</b>  | 1717 | 2184 | <b>1950,5</b> |
| DLX6     | 2,412774  | -0,349215 | <b>1,0317795</b> | 1437 | 2104 | <b>1770,5</b> |
| TCAP     | 1,023845  | 1,040379  | <b>1,032112</b>  | 1140 | 1830 | <b>1485</b>   |
| PTER     | 0,390699  | 1,674089  | <b>1,032394</b>  | 1764 | 2760 | <b>2262</b>   |
| CDC25C   | -0,292203 | 2,357032  | <b>1,0324145</b> | 1538 | 2267 | <b>1902,5</b> |
| RAD23B   | 0,134433  | 1,931211  | <b>1,032822</b>  | 1732 | 1918 | <b>1825</b>   |
| CYR61    | 0,676728  | 1,390476  | <b>1,033602</b>  | 2335 | 2029 | <b>2182</b>   |
| HBE1     | 1,876759  | 0,191033  | <b>1,033896</b>  | 1389 | 1553 | <b>1471</b>   |
| GDI1     | -0,642611 | 2,710615  | <b>1,034002</b>  | 2288 | 1985 | <b>2136,5</b> |
| ZNF684   | 1,034554  | NaN       | <b>1,034554</b>  | 1782 | NaN  | <b>1782</b>   |
| ART3     | 0,667218  | 1,403293  | <b>1,0352555</b> | 1794 | 2010 | <b>1902</b>   |
| SMO      | 1,211292  | 0,859693  | <b>1,0354925</b> | 1012 | 1574 | <b>1293</b>   |
| OR4E2    | 0,635156  | 1,435994  | <b>1,035575</b>  | 1755 | 1774 | <b>1764,5</b> |
| DLG4     | 0,978537  | 1,092731  | <b>1,035634</b>  | 2129 | 1965 | <b>2047</b>   |
| SPEF1    | 1,036124  | NaN       | <b>1,036124</b>  | 1311 | NaN  | <b>1311</b>   |
| SLC25A23 | 1,401082  | 0,671533  | <b>1,0363075</b> | 1405 | 1893 | <b>1649</b>   |
| SUDS3    | 1,036435  | NaN       | <b>1,036435</b>  | 1802 | NaN  | <b>1802</b>   |
| SLC17A5  | 0,907328  | 1,166102  | <b>1,036715</b>  | 1872 | 2542 | <b>2207</b>   |
| SLC16A2  | NaN       | 1,036906  | <b>1,036906</b>  | NaN  | 2822 | <b>2822</b>   |
| 02-mars  | 1,260222  | 0,813614  | <b>1,036918</b>  | 2331 | 2754 | <b>2542,5</b> |
| SHQ1     | 1,655765  | 0,418413  | <b>1,037089</b>  | 1814 | 2468 | <b>2141</b>   |
| MRPS10   | 1,418759  | 0,655918  | <b>1,0373385</b> | 1911 | 1734 | <b>1822,5</b> |
| MRPL47   | 1,037596  | NaN       | <b>1,037596</b>  | 1760 | NaN  | <b>1760</b>   |
| EDF1     | 1,49408   | 0,581375  | <b>1,0377275</b> | 1600 | 2862 | <b>2231</b>   |
| LCMT2    | 1,778192  | 0,29745   | <b>1,037821</b>  | 1725 | 2648 | <b>2186,5</b> |
| ZNF385C  | 1,555431  | 0,520668  | <b>1,0380495</b> | 1345 | 2076 | <b>1710,5</b> |
| PCDHB14  | 1,038681  | NaN       | <b>1,038681</b>  | 1924 | NaN  | <b>1924</b>   |
| GULP1    | 1,592211  | 0,485176  | <b>1,0386935</b> | 1180 | 1640 | <b>1410</b>   |
| LAMA5    | 1,440601  | 0,637236  | <b>1,0389185</b> | 806  | 2541 | <b>1673,5</b> |
| ADAMTS9  | 1,344266  | 0,733594  | <b>1,03893</b>   | 2136 | 2298 | <b>2217</b>   |
| MAPK13   | 0,469917  | 1,609155  | <b>1,039536</b>  | 1804 | 1811 | <b>1807,5</b> |

|           |          |          |                  |      |      |               |
|-----------|----------|----------|------------------|------|------|---------------|
| IST1      | 0,068207 | 2,011849 | <b>1,040028</b>  | 1531 | 1834 | <b>1682,5</b> |
| MED15     | 1,389101 | 0,691128 | <b>1,0401145</b> | 1612 | 1423 | <b>1517,5</b> |
| ARMC3     | 1,36925  | 0,713053 | <b>1,0411515</b> | 1765 | 2428 | <b>2096,5</b> |
| NKX2-2    | 1,775731 | 0,306854 | <b>1,0412925</b> | 1638 | 1909 | <b>1773,5</b> |
| TSKU      | 1,434076 | 0,648879 | <b>1,0414775</b> | 1458 | 2415 | <b>1936,5</b> |
| PCMT1     | NaN      | 1,041752 | <b>1,041752</b>  | NaN  | 1962 | <b>1962</b>   |
| C14orf135 | 0,045775 | 2,037875 | <b>1,041825</b>  | 1406 | 1778 | <b>1592</b>   |
| TTC7B     | 0,465328 | 1,620013 | <b>1,0426705</b> | 2092 | 1956 | <b>2024</b>   |
| CLDN1     | 1,468255 | 0,617208 | <b>1,0427315</b> | 1732 | 1700 | <b>1716</b>   |
| SCMH1     | 1,13323  | 0,952325 | <b>1,0427775</b> | 1550 | 2267 | <b>1908,5</b> |
| C14orf48  | 1,042845 | NaN      | <b>1,042845</b>  | 1642 | NaN  | <b>1642</b>   |
| PHLPP2    | 0,334021 | 1,753188 | <b>1,0436045</b> | 2134 | 2513 | <b>2323,5</b> |
| P2RY10    | 1,044136 | NaN      | <b>1,044136</b>  | 1572 | NaN  | <b>1572</b>   |
| GPR116    | 1,044235 | NaN      | <b>1,044235</b>  | 1865 | NaN  | <b>1865</b>   |
| C10orf76  | 1,044695 | NaN      | <b>1,044695</b>  | 1500 | NaN  | <b>1500</b>   |
| PHC3      | 1,839325 | 0,250092 | <b>1,0447085</b> | 1393 | 1888 | <b>1640,5</b> |
| PWP2      | 1,045663 | NaN      | <b>1,045663</b>  | 1491 | NaN  | <b>1491</b>   |
| XKR4      | 1,045876 | NaN      | <b>1,045876</b>  | 1673 | NaN  | <b>1673</b>   |
| CNIH      | 1,901993 | 0,189934 | <b>1,0459635</b> | 1572 | 2510 | <b>2041</b>   |
| TMEM151A  | 0,680311 | 1,412306 | <b>1,0463085</b> | 1129 | 2218 | <b>1673,5</b> |
| SYNPO     | 0,450728 | 1,642052 | <b>1,04639</b>   | 1231 | 1558 | <b>1394,5</b> |
| VAX1      | 1,215249 | 0,878338 | <b>1,0467935</b> | 1821 | 2476 | <b>2148,5</b> |
| PSMA1     | 1,713526 | 0,3808   | <b>1,047163</b>  | 894  | 1255 | <b>1074,5</b> |
| ERBB3     | 0,457921 | 1,637677 | <b>1,047799</b>  | 1406 | 2126 | <b>1766</b>   |
| ADAMTS14  | 0,894904 | 1,200971 | <b>1,0479375</b> | 1797 | 2430 | <b>2113,5</b> |
| PARP3     | 1,850958 | 0,245179 | <b>1,0480685</b> | 1402 | 2294 | <b>1848</b>   |
| ATP13A5   | 1,181632 | 0,914517 | <b>1,0480745</b> | 1959 | 1992 | <b>1975,5</b> |
| PYGO2     | 1,384078 | 0,712197 | <b>1,0481375</b> | 1552 | 1871 | <b>1711,5</b> |
| WNT4      | 1,929274 | 0,167276 | <b>1,048275</b>  | 1544 | 1927 | <b>1735,5</b> |
| SCUBE3    | 1,04875  | NaN      | <b>1,04875</b>   | 1232 | NaN  | <b>1232</b>   |
| GAPDH     | 0,696664 | 1,401176 | <b>1,04892</b>   | 1655 | 2230 | <b>1942,5</b> |
| KLHL2     | 1,049302 | NaN      | <b>1,049302</b>  | 1264 | NaN  | <b>1264</b>   |
| MPL       | NaN      | 1,049408 | <b>1,049408</b>  | NaN  | 2298 | <b>2298</b>   |
| LPCAT1    | 0,865312 | 1,233514 | <b>1,049413</b>  | 2055 | 2636 | <b>2345,5</b> |

|           |           |           |                  |      |      |               |
|-----------|-----------|-----------|------------------|------|------|---------------|
| STK32B    | 0,45021   | 1,648802  | <b>1,049506</b>  | 1914 | 2327 | <b>2120,5</b> |
| RHOD      | 2,365727  | -0,265269 | <b>1,050229</b>  | 1467 | 1773 | <b>1620</b>   |
| EIF4ENIF1 | 1,558592  | 0,541873  | <b>1,0502325</b> | 1607 | 2471 | <b>2039</b>   |
| ARID3B    | 1,050484  | NaN       | <b>1,050484</b>  | 1298 | NaN  | <b>1298</b>   |
| ST8SIA1   | 0,74368   | 1,359358  | <b>1,051519</b>  | 1748 | 2304 | <b>2026</b>   |
| SLC25A32  | 1,334086  | 0,769094  | <b>1,05159</b>   | 1785 | 1873 | <b>1829</b>   |
| ACHE      | -0,091954 | 2,195865  | <b>1,0519555</b> | 1497 | 1913 | <b>1705</b>   |
| ZFP64     | 1,052154  | NaN       | <b>1,052154</b>  | 1409 | NaN  | <b>1409</b>   |
| OR51L1    | 1,324771  | 0,779737  | <b>1,052254</b>  | 1634 | 1642 | <b>1638</b>   |
| CD4       | 1,437562  | 0,668008  | <b>1,052785</b>  | 1341 | 1484 | <b>1412,5</b> |
| GLB1L2    | 1,089029  | 1,017255  | <b>1,053142</b>  | 1443 | 2538 | <b>1990,5</b> |
| DERL3     | 1,450345  | 0,656315  | <b>1,05333</b>   | 1091 | 1463 | <b>1277</b>   |
| MUL1      | 0,40515   | 1,701686  | <b>1,053418</b>  | 1951 | 2739 | <b>2345</b>   |
| DCAF13    | 1,053689  | NaN       | <b>1,053689</b>  | 1382 | NaN  | <b>1382</b>   |
| URGCP     | 1,191938  | 0,916817  | <b>1,0543775</b> | 1229 | 1296 | <b>1262,5</b> |
| LMF1      | 0,939808  | 1,171002  | <b>1,055405</b>  | 1785 | 1896 | <b>1840,5</b> |
| NDUFAF3   | 0,938849  | 1,172514  | <b>1,0556815</b> | 1665 | 1917 | <b>1791</b>   |
| HMGCL     | 1,389929  | 0,721976  | <b>1,0559525</b> | 1709 | 3153 | <b>2431</b>   |
| HLA-DMB   | 1,376675  | 0,735418  | <b>1,0560465</b> | 1793 | 1960 | <b>1876,5</b> |
| RNASE13   | 1,328667  | 0,783566  | <b>1,0561165</b> | 1660 | 1835 | <b>1747,5</b> |
| SCTR      | 1,056531  | NaN       | <b>1,056531</b>  | 1198 | NaN  | <b>1198</b>   |
| ZFP1      | 0,955942  | 1,158304  | <b>1,057123</b>  | 2324 | 2223 | <b>2273,5</b> |
| URB2      | 1,943339  | 0,171307  | <b>1,057323</b>  | 845  | 2060 | <b>1452,5</b> |
| AMDHD1    | 1,057673  | NaN       | <b>1,057673</b>  | 1693 | NaN  | <b>1693</b>   |
| TMEM173   | 1,132664  | 0,98362   | <b>1,058142</b>  | 1758 | 1896 | <b>1827</b>   |
| NT5DC3    | 1,119804  | 0,996617  | <b>1,0582105</b> | 1959 | 2258 | <b>2108,5</b> |
| DUS3L     | 1,206148  | 0,910528  | <b>1,058338</b>  | 1322 | 1677 | <b>1499,5</b> |
| CDKN1C    | 1,118216  | 0,999693  | <b>1,0589545</b> | 1097 | 2093 | <b>1595</b>   |
| TRIM29    | 0,039825  | 2,078243  | <b>1,059034</b>  | 1803 | 2455 | <b>2129</b>   |
| CSF2RA    | 1,508553  | 0,609815  | <b>1,059184</b>  | 1811 | 1590 | <b>1700,5</b> |
| SLC16A12  | 0,685358  | 1,433455  | <b>1,0594065</b> | 2025 | 1528 | <b>1776,5</b> |
| LPA       | -0,471617 | 2,590715  | <b>1,059549</b>  | 1635 | 2125 | <b>1880</b>   |
| TAS2R10   | 1,060948  | NaN       | <b>1,060948</b>  | 1590 | NaN  | <b>1590</b>   |
| CASC4     | 0,967787  | 1,154413  | <b>1,0611</b>    | 1809 | 2082 | <b>1945,5</b> |

|          |          |          |                  |      |      |               |
|----------|----------|----------|------------------|------|------|---------------|
| KIF18A   | 1,848602 | 0,273811 | <b>1,0612065</b> | 1612 | 1875 | <b>1743,5</b> |
| PDX1     | 0,133581 | 1,990352 | <b>1,0619665</b> | 2020 | 2147 | <b>2083,5</b> |
| FN3KRP   | 1,970041 | 0,15439  | <b>1,0622155</b> | 1117 | 1466 | <b>1291,5</b> |
| PELP1    | 1,063207 | 1,061364 | <b>1,0622855</b> | 1680 | 1995 | <b>1837,5</b> |
| RASSF5   | 0,65981  | 1,465026 | <b>1,062418</b>  | 1988 | 2474 | <b>2231</b>   |
| SLC5A8   | 1,699077 | 0,426189 | <b>1,062633</b>  | 1725 | 2113 | <b>1919</b>   |
| LPCAT3   | 0,761276 | 1,364881 | <b>1,0630785</b> | 1897 | 2110 | <b>2003,5</b> |
| SIRT2    | 1,047341 | 1,079036 | <b>1,0631885</b> | 1136 | 1303 | <b>1219,5</b> |
| LMOD3    | 0,971006 | 1,155731 | <b>1,0633685</b> | 1465 | 1427 | <b>1446</b>   |
| C11orf40 | 1,063638 | NaN      | <b>1,063638</b>  | 1478 | NaN  | <b>1478</b>   |
| UBR7     | 1,378411 | 0,749898 | <b>1,0641545</b> | 1649 | 1798 | <b>1723,5</b> |
| TXNDC9   | 1,064346 | NaN      | <b>1,064346</b>  | 1303 | NaN  | <b>1303</b>   |
| NADKD1   | 1,064362 | NaN      | <b>1,064362</b>  | 1528 | NaN  | <b>1528</b>   |
| KRTAP8-1 | 0,536875 | 1,59579  | <b>1,0663325</b> | 1597 | 1575 | <b>1586</b>   |
| ASMTL    | 1,184068 | 0,949449 | <b>1,0667585</b> | 1628 | 2627 | <b>2127,5</b> |
| DSCAM    | 1,066771 | NaN      | <b>1,066771</b>  | 1884 | NaN  | <b>1884</b>   |
| SYBU     | 1,083828 | 1,050943 | <b>1,0673855</b> | 1768 | 2301 | <b>2034,5</b> |
| CENPL    | 1,26556  | 0,870804 | <b>1,068182</b>  | 1618 | 2295 | <b>1956,5</b> |
| CPE      | 1,45513  | 0,682681 | <b>1,0689055</b> | 1524 | 1635 | <b>1579,5</b> |
| CSNK1G3  | 1,413991 | 0,724285 | <b>1,069138</b>  | 1516 | 1732 | <b>1624</b>   |
| HYAL3    | 1,917926 | 0,221099 | <b>1,0695125</b> | 1484 | 2372 | <b>1928</b>   |
| RABGAP1  | 1,070176 | NaN      | <b>1,070176</b>  | 1906 | NaN  | <b>1906</b>   |
| EGF      | 1,450194 | 0,690284 | <b>1,070239</b>  | 1624 | 2431 | <b>2027,5</b> |
| ABHD15   | 1,262115 | 0,878719 | <b>1,070417</b>  | 1587 | 1758 | <b>1672,5</b> |
| PNLIPRP1 | 0,613934 | 1,527529 | <b>1,0707315</b> | 1867 | 2193 | <b>2030</b>   |
| PRDX4    | 0,867618 | 1,273871 | <b>1,0707445</b> | 2116 | 2084 | <b>2100</b>   |
| ANKRD27  | 1,020662 | 1,121016 | <b>1,070839</b>  | 1997 | 2120 | <b>2058,5</b> |
| FAM206A  | 1,071029 | NaN      | <b>1,071029</b>  | 1498 | NaN  | <b>1498</b>   |
| ASCL2    | 1,081589 | 1,060651 | <b>1,07112</b>   | 1597 | 1591 | <b>1594</b>   |
| SUV39H1  | 1,597909 | 0,544454 | <b>1,0711815</b> | 1203 | 1290 | <b>1246,5</b> |
| TMEM89   | 0,917038 | 1,225657 | <b>1,0713475</b> | 561  | 1898 | <b>1229,5</b> |
| FUT1     | 0,760776 | 1,38216  | <b>1,071468</b>  | 1795 | 2413 | <b>2104</b>   |
| IL17RD   | 1,200789 | 0,942169 | <b>1,071479</b>  | 1221 | 1758 | <b>1489,5</b> |
| STRA6    | 1,071511 | NaN      | <b>1,071511</b>  | 1177 | NaN  | <b>1177</b>   |

|          |          |          |                  |      |      |               |
|----------|----------|----------|------------------|------|------|---------------|
| SLC8A2   | 1,186765 | 0,957007 | <b>1,071886</b>  | 1224 | 1372 | <b>1298</b>   |
| OR11G2   | 0,950743 | 1,193387 | <b>1,072065</b>  | 1353 | 1219 | <b>1286</b>   |
| TH1L     | 1,252058 | 0,893879 | <b>1,0729685</b> | 1690 | 1978 | <b>1834</b>   |
| XPO7     | 0,100014 | 2,046036 | <b>1,073025</b>  | 1844 | 2840 | <b>2342</b>   |
| DCUN1D1  | 0,380445 | 1,765671 | <b>1,073058</b>  | 1898 | 2569 | <b>2233,5</b> |
| EDNRA    | 1,073147 | NaN      | <b>1,073147</b>  | 1686 | NaN  | <b>1686</b>   |
| PSTPIP2  | 1,331887 | 0,815875 | <b>1,073881</b>  | 1332 | 1566 | <b>1449</b>   |
| SCRT1    | 1,727603 | 0,420564 | <b>1,0740835</b> | 1635 | 1840 | <b>1737,5</b> |
| GNAO1    | 1,074731 | NaN      | <b>1,074731</b>  | 1677 | NaN  | <b>1677</b>   |
| GTSE1    | NaN      | 1,074772 | <b>1,074772</b>  | NaN  | 2442 | <b>2442</b>   |
| HIBCH    | 1,576763 | 0,573726 | <b>1,0752445</b> | 2005 | 2718 | <b>2361,5</b> |
| IDH2     | 0,800225 | 1,35188  | <b>1,0760525</b> | 1912 | 1850 | <b>1881</b>   |
| SPIRE1   | 1,334478 | 0,817967 | <b>1,0762225</b> | 1805 | 2103 | <b>1954</b>   |
| BMP6     | 0,746066 | 1,407528 | <b>1,076797</b>  | 1863 | 2637 | <b>2250</b>   |
| C19orf53 | 1,552121 | 0,601477 | <b>1,076799</b>  | 1545 | 1861 | <b>1703</b>   |
| CD207    | 1,732947 | 0,421727 | <b>1,077337</b>  | 1614 | 2294 | <b>1954</b>   |
| C8orf46  | 1,077459 | NaN      | <b>1,077459</b>  | 1937 | NaN  | <b>1937</b>   |
| XCR1     | 1,077603 | NaN      | <b>1,077603</b>  | 1916 | NaN  | <b>1916</b>   |
| RNPEPL1  | 1,676745 | 0,48027  | <b>1,0785075</b> | 1664 | 1527 | <b>1595,5</b> |
| RAMP3    | 0,52188  | 1,635314 | <b>1,078597</b>  | 1636 | 1499 | <b>1567,5</b> |
| C1QTNF6  | 1,14122  | 1,016096 | <b>1,078658</b>  | 652  | 1317 | <b>984,5</b>  |
| C12orf51 | 0,92434  | 1,233437 | <b>1,0788885</b> | 1996 | 2731 | <b>2363,5</b> |
| GCNT2    | 1,906616 | 0,251857 | <b>1,0792365</b> | 1597 | 1849 | <b>1723</b>   |
| KDM3A    | 1,079435 | NaN      | <b>1,079435</b>  | 1737 | NaN  | <b>1737</b>   |
| LAPTM5   | 1,651206 | 0,508844 | <b>1,080025</b>  | 1485 | 1748 | <b>1616,5</b> |
| C17orf65 | 1,037865 | 1,122764 | <b>1,0803145</b> | 2102 | 2210 | <b>2156</b>   |
| B3GALNT1 | 0,75986  | 1,400862 | <b>1,080361</b>  | 1559 | 2089 | <b>1824</b>   |
| RYR2     | 2,557399 | -0,39657 | <b>1,0804145</b> | 1897 | 2947 | <b>2422</b>   |
| MMP9     | 0,702759 | 1,458605 | <b>1,080682</b>  | 1543 | 1756 | <b>1649,5</b> |
| IDH1     | 1,494424 | 0,667669 | <b>1,0810465</b> | 2004 | 2177 | <b>2090,5</b> |
| AQP6     | 0,788905 | 1,37457  | <b>1,0817375</b> | 2002 | 2338 | <b>2170</b>   |
| TRMT11   | 0,274588 | 1,889069 | <b>1,0818285</b> | 1796 | 2401 | <b>2098,5</b> |
| RPRD2    | 0,240302 | 1,923921 | <b>1,0821115</b> | 1457 | 2674 | <b>2065,5</b> |
| WAPAL    | 1,082162 | NaN      | <b>1,082162</b>  | 1895 | NaN  | <b>1895</b>   |



|          |          |          |                  |      |      |               |
|----------|----------|----------|------------------|------|------|---------------|
| TTPA     | 1,012042 | 1,15562  | <b>1,083831</b>  | 1184 | 1476 | <b>1330</b>   |
| CUTA     | 0,565966 | 1,601883 | <b>1,0839245</b> | 1545 | 2370 | <b>1957,5</b> |
| BRD2     | 0,937321 | 1,230573 | <b>1,083947</b>  | 1940 | 2138 | <b>2039</b>   |
| MAPK8IP2 | 0,472975 | 1,695414 | <b>1,0841945</b> | 1666 | 2026 | <b>1846</b>   |
| MAL      | 0,894825 | 1,273773 | <b>1,084299</b>  | 1874 | 1951 | <b>1912,5</b> |
| SYNPR    | 1,109987 | 1,058861 | <b>1,084424</b>  | 1356 | 1992 | <b>1674</b>   |
| ZNF354C  | 1,482492 | 0,68766  | <b>1,085076</b>  | 1899 | 2065 | <b>1982</b>   |
| MAP4K3   | 1,145813 | 1,026513 | <b>1,086163</b>  | 1725 | 2399 | <b>2062</b>   |
| MAP3K11  | 0,950846 | 1,222474 | <b>1,08666</b>   | 1533 | 2333 | <b>1933</b>   |
| NCAM1    | 1,087346 | NaN      | <b>1,087346</b>  | 1438 | NaN  | <b>1438</b>   |
| C1orf229 | 1,153769 | 1,021237 | <b>1,087503</b>  | 1753 | 1779 | <b>1766</b>   |
| TMEM132B | 1,641925 | 0,53337  | <b>1,0876475</b> | 1451 | 2035 | <b>1743</b>   |
| ZSCAN4   | 1,087717 | NaN      | <b>1,087717</b>  | 1799 | NaN  | <b>1799</b>   |
| BFAR     | 1,488036 | 0,687428 | <b>1,087732</b>  | 1606 | 2409 | <b>2007,5</b> |
| ARL13A   | 1,181061 | 0,995981 | <b>1,088521</b>  | 1573 | 2575 | <b>2074</b>   |
| CITED4   | 0,279716 | 1,898298 | <b>1,089007</b>  | 1793 | 2347 | <b>2070</b>   |
| EMP3     | 0,722533 | 1,456008 | <b>1,0892705</b> | 1757 | 2967 | <b>2362</b>   |
| NELF     | 1,089297 | NaN      | <b>1,089297</b>  | 1623 | NaN  | <b>1623</b>   |
| NCAPH2   | 1,058146 | 1,12063  | <b>1,089388</b>  | 1408 | 1873 | <b>1640,5</b> |
| C2orf73  | 1,140439 | 1,038694 | <b>1,0895665</b> | 1637 | 1853 | <b>1745</b>   |
| FCHO1    | 1,08962  | NaN      | <b>1,08962</b>   | 958  | NaN  | <b>958</b>    |
| PBXIP1   | 1,606404 | 0,573547 | <b>1,0899755</b> | 584  | 2141 | <b>1362,5</b> |
| SLC35F3  | 1,09043  | NaN      | <b>1,09043</b>   | 1890 | NaN  | <b>1890</b>   |
| HBP1     | 1,208786 | 0,972141 | <b>1,0904635</b> | 1647 | 2388 | <b>2017,5</b> |
| CHRM4    | 1,091023 | NaN      | <b>1,091023</b>  | 1468 | NaN  | <b>1468</b>   |
| ZNF225   | 1,617671 | 0,564845 | <b>1,091258</b>  | 1301 | 2316 | <b>1808,5</b> |
| CLK4     | 0,784611 | 1,398347 | <b>1,091479</b>  | 1882 | 2272 | <b>2077</b>   |
| NSD1     | 0,905885 | 1,277683 | <b>1,091784</b>  | 1713 | 2408 | <b>2060,5</b> |
| CDKL2    | 1,177395 | 1,006314 | <b>1,0918545</b> | 1599 | 2130 | <b>1864,5</b> |
| GABARAP  | 1,268045 | 0,916527 | <b>1,092286</b>  | 1396 | 2086 | <b>1741</b>   |
| PTGER4   | 1,093267 | NaN      | <b>1,093267</b>  | 1904 | NaN  | <b>1904</b>   |
| HES6     | 0,648995 | 1,538525 | <b>1,09376</b>   | 1230 | 1274 | <b>1252</b>   |
| CUL9     | 1,107343 | 1,081651 | <b>1,094497</b>  | 1683 | 2453 | <b>2068</b>   |
| SERTAD2  | NaN      | 1,094706 | <b>1,094706</b>  | NaN  | 2900 | <b>2900</b>   |

|          |           |           |                  |      |      |               |
|----------|-----------|-----------|------------------|------|------|---------------|
| MRPL15   | 1,094904  | NaN       | <b>1,094904</b>  | 1575 | NaN  | <b>1575</b>   |
| ADAMTSL4 | 1,095042  | NaN       | <b>1,095042</b>  | 1753 | NaN  | <b>1753</b>   |
| KCNJ11   | -0,012655 | 2,202836  | <b>1,0950905</b> | 1548 | 2385 | <b>1966,5</b> |
| PTGDS    | 0,98296   | 1,207496  | <b>1,095228</b>  | 1169 | 2022 | <b>1595,5</b> |
| ASPHD1   | 1,832455  | 0,359437  | <b>1,095946</b>  | 563  | 1311 | <b>937</b>    |
| CTGF     | NaN       | 1,096695  | <b>1,096695</b>  | NaN  | 1460 | <b>1460</b>   |
| BRP44L   | 2,197169  | -0,003527 | <b>1,096821</b>  | 1609 | 2319 | <b>1964</b>   |
| KLRG1    | 1,381099  | 0,812809  | <b>1,096954</b>  | 1682 | 2062 | <b>1872</b>   |
| TCEAL5   | 1,097141  | NaN       | <b>1,097141</b>  | 1969 | NaN  | <b>1969</b>   |
| MTR      | 1,995608  | 0,198903  | <b>1,0972555</b> | 1984 | 2124 | <b>2054</b>   |
| SLC35E3  | 0,512459  | 1,682176  | <b>1,0973175</b> | 1719 | 1551 | <b>1635</b>   |
| OR56B4   | 2,096674  | 0,099459  | <b>1,0980665</b> | 1372 | 1780 | <b>1576</b>   |
| RFX4     | 1,693889  | 0,502681  | <b>1,098285</b>  | 1771 | 1243 | <b>1507</b>   |
| CENPC1   | 1,098883  | NaN       | <b>1,098883</b>  | 1160 | NaN  | <b>1160</b>   |
| OR14C36  | 1,098901  | NaN       | <b>1,098901</b>  | 2217 | NaN  | <b>2217</b>   |
| RPS3     | 1,600023  | 0,598201  | <b>1,099112</b>  | 1056 | 971  | <b>1013,5</b> |
| COL6A1   | 1,792328  | 0,407774  | <b>1,100051</b>  | 1778 | 1739 | <b>1758,5</b> |
| ASPSR1   | 1,10028   | NaN       | <b>1,10028</b>   | 1618 | NaN  | <b>1618</b>   |
| TRAPPC5  | 1,100619  | NaN       | <b>1,100619</b>  | 2069 | NaN  | <b>2069</b>   |
| SLC25A14 | 0,527168  | 1,674515  | <b>1,1008415</b> | 1943 | 2607 | <b>2275</b>   |
| NPC1L1   | 1,157205  | 1,044495  | <b>1,10085</b>   | 2247 | 2234 | <b>2240,5</b> |
| MRPS36   | 1,101141  | NaN       | <b>1,101141</b>  | 1491 | NaN  | <b>1491</b>   |
| SRI      | 1,103331  | NaN       | <b>1,103331</b>  | 1142 | NaN  | <b>1142</b>   |
| CDR2L    | 0,765892  | 1,441971  | <b>1,1039315</b> | 1532 | 2295 | <b>1913,5</b> |
| AKAP1    | 1,163058  | 1,045747  | <b>1,1044025</b> | 2378 | 1508 | <b>1943</b>   |
| CCDC34   | 1,104476  | NaN       | <b>1,104476</b>  | 1927 | NaN  | <b>1927</b>   |
| DDX20    | 1,118155  | 1,090935  | <b>1,104545</b>  | 1209 | 1859 | <b>1534</b>   |
| G6PC2    | 1,054419  | 1,15526   | <b>1,1048395</b> | 1410 | 1883 | <b>1646,5</b> |
| APOC1    | 0,33319   | 1,876504  | <b>1,104847</b>  | 1190 | 1666 | <b>1428</b>   |
| ZMIZ2    | 1,104969  | NaN       | <b>1,104969</b>  | 1806 | NaN  | <b>1806</b>   |
| CCDC83   | 1,105352  | NaN       | <b>1,105352</b>  | 1116 | NaN  | <b>1116</b>   |
| ECHS1    | 1,840592  | 0,371891  | <b>1,1062415</b> | 1780 | 2004 | <b>1892</b>   |
| PFDN6    | 1,106584  | NaN       | <b>1,106584</b>  | 2237 | NaN  | <b>2237</b>   |
| SMPD3    | NaN       | 1,106627  | <b>1,106627</b>  | NaN  | 2840 | <b>2840</b>   |

|            |          |          |                  |      |      |               |
|------------|----------|----------|------------------|------|------|---------------|
| HMG3       | 1,665067 | 0,551506 | <b>1,1082865</b> | 1129 | 2535 | <b>1832</b>   |
| MORC1      | 0,496455 | 1,7218   | <b>1,1091275</b> | 1200 | 1766 | <b>1483</b>   |
| DRAP1      | 0,762742 | 1,455573 | <b>1,1091575</b> | 1671 | 1986 | <b>1828,5</b> |
| CD226      | 0,857499 | 1,361909 | <b>1,109704</b>  | 1064 | 1903 | <b>1483,5</b> |
| ZNF426     | 0,606985 | 1,613745 | <b>1,110365</b>  | 1355 | 1441 | <b>1398</b>   |
| CCKBR      | 1,111027 | NaN      | <b>1,111027</b>  | 1673 | NaN  | <b>1673</b>   |
| FAM120B    | 1,563887 | 0,65867  | <b>1,1112785</b> | 1687 | 1796 | <b>1741,5</b> |
| SYVN1      | 1,561165 | 0,66375  | <b>1,1124575</b> | 1741 | 2165 | <b>1953</b>   |
| CDC7       | 1,02446  | 1,201902 | <b>1,113181</b>  | 1985 | 1658 | <b>1821,5</b> |
| CRK        | 1,496255 | 0,730261 | <b>1,113258</b>  | 1410 | 1566 | <b>1488</b>   |
| C19orf35   | 1,113666 | NaN      | <b>1,113666</b>  | 2065 | NaN  | <b>2065</b>   |
| CRCT1      | 1,1947   | 1,034    | <b>1,11435</b>   | 2209 | 2274 | <b>2241,5</b> |
| DUS4L      | 1,114561 | NaN      | <b>1,114561</b>  | 1988 | NaN  | <b>1988</b>   |
| PCDHA5     | 1,175194 | 1,054619 | <b>1,1149065</b> | 1377 | 2137 | <b>1757</b>   |
| CLEC12A    | 0,621806 | 1,608261 | <b>1,1150335</b> | 1975 | 1891 | <b>1933</b>   |
| SLC22A18AS | 0,828945 | 1,401472 | <b>1,1152085</b> | 1303 | 1805 | <b>1554</b>   |
| TMEM204    | 1,533041 | 0,698427 | <b>1,115734</b>  | 1637 | 1882 | <b>1759,5</b> |
| MTNR1A     | 1,115781 | NaN      | <b>1,115781</b>  | 1690 | NaN  | <b>1690</b>   |
| NOX5       | 2,002757 | 0,229967 | <b>1,116362</b>  | 1485 | 2144 | <b>1814,5</b> |
| ARHGEF12   | 1,081962 | 1,151003 | <b>1,1164825</b> | 1855 | 1946 | <b>1900,5</b> |
| ADAMTS8    | 1,129463 | 1,104866 | <b>1,1171645</b> | 1412 | 2324 | <b>1868</b>   |
| GLO1       | 0,59198  | 1,64238  | <b>1,11718</b>   | 2066 | 2358 | <b>2212</b>   |
| QRFP       | 1,884094 | 0,350999 | <b>1,1175465</b> | 1401 | 1024 | <b>1212,5</b> |
| ESPL1      | 1,685158 | 0,551464 | <b>1,118311</b>  | 797  | 1340 | <b>1068,5</b> |
| C6orf125   | 1,1187   | NaN      | <b>1,1187</b>    | 1324 | NaN  | <b>1324</b>   |
| MASTL      | 1,222958 | 1,01576  | <b>1,119359</b>  | 1376 | 1265 | <b>1320,5</b> |
| PRPF38A    | 0,172426 | 2,066669 | <b>1,1195475</b> | 1339 | 1258 | <b>1298,5</b> |
| ENAH       | 1,621096 | 0,618029 | <b>1,1195625</b> | 954  | 1786 | <b>1370</b>   |
| DMKN       | 1,119736 | NaN      | <b>1,119736</b>  | 842  | NaN  | <b>842</b>    |
| RPL27      | 1,119858 | NaN      | <b>1,119858</b>  | 939  | NaN  | <b>939</b>    |
| TMEM129    | 0,855362 | 1,385426 | <b>1,120394</b>  | 1519 | 1571 | <b>1545</b>   |
| BTN3A3     | 1,615888 | 0,62499  | <b>1,120439</b>  | 1387 | 1574 | <b>1480,5</b> |
| CSNK2B     | 0,784415 | 1,458878 | <b>1,1216465</b> | 1652 | 2040 | <b>1846</b>   |
| KCNJ6      | 1,272213 | 0,971542 | <b>1,1218775</b> | 2301 | 2926 | <b>2613,5</b> |

|           |          |           |                  |      |      |               |
|-----------|----------|-----------|------------------|------|------|---------------|
| GPR52     | 1,122128 | NaN       | <b>1,122128</b>  | 1989 | NaN  | <b>1989</b>   |
| ANXA6     | 0,375411 | 1,86916   | <b>1,1222855</b> | 2295 | 2130 | <b>2212,5</b> |
| ANKRD49   | 2,374668 | -0,129852 | <b>1,122408</b>  | 1438 | 1843 | <b>1640,5</b> |
| PAX7      | 0,981018 | 1,26409   | <b>1,122554</b>  | 1210 | 1579 | <b>1394,5</b> |
| DNAJB9    | 1,122781 | NaN       | <b>1,122781</b>  | 1753 | NaN  | <b>1753</b>   |
| HN1L      | 1,123141 | NaN       | <b>1,123141</b>  | 1613 | NaN  | <b>1613</b>   |
| DOCK3     | 1,03725  | 1,210438  | <b>1,123844</b>  | 2000 | 1992 | <b>1996</b>   |
| YIPF5     | 0,963556 | 1,284335  | <b>1,1239455</b> | 1550 | 1621 | <b>1585,5</b> |
| CELF3     | 0,215498 | 2,033496  | <b>1,124497</b>  | 1747 | 1952 | <b>1849,5</b> |
| ZBTB17    | 1,742243 | 0,506937  | <b>1,12459</b>   | 1212 | 1500 | <b>1356</b>   |
| LINC00176 | 1,125057 | NaN       | <b>1,125057</b>  | 1763 | NaN  | <b>1763</b>   |
| TDRD3     | 0,962924 | 1,287255  | <b>1,1250895</b> | 1917 | 1718 | <b>1817,5</b> |
| ATCAY     | 1,125507 | NaN       | <b>1,125507</b>  | 1806 | NaN  | <b>1806</b>   |
| ESRRA     | 0,065138 | 2,186312  | <b>1,125725</b>  | 1073 | 1882 | <b>1477,5</b> |
| RPL38     | 1,126102 | NaN       | <b>1,126102</b>  | 1048 | NaN  | <b>1048</b>   |
| CCDC27    | 1,166643 | 1,085857  | <b>1,12625</b>   | 1798 | 2016 | <b>1907</b>   |
| USH1G     | 2,01844  | 0,234522  | <b>1,126481</b>  | 1488 | 1833 | <b>1660,5</b> |
| ZMAT2     | 1,126615 | NaN       | <b>1,126615</b>  | 1134 | NaN  | <b>1134</b>   |
| LPPR2     | 1,109577 | 1,143891  | <b>1,126734</b>  | 2123 | 2015 | <b>2069</b>   |
| KRT74     | 1,127234 | NaN       | <b>1,127234</b>  | 1790 | NaN  | <b>1790</b>   |
| TTI1      | 0,825119 | 1,430417  | <b>1,127768</b>  | 1564 | 1646 | <b>1605</b>   |
| FBLN2     | 1,12782  | NaN       | <b>1,12782</b>   | 1043 | NaN  | <b>1043</b>   |
| TM9SF3    | 1,128066 | NaN       | <b>1,128066</b>  | 1380 | NaN  | <b>1380</b>   |
| APOA2     | 1,903127 | 0,35414   | <b>1,1286335</b> | 1473 | 1858 | <b>1665,5</b> |
| RYR3      | 1,582558 | 0,676347  | <b>1,1294525</b> | 2244 | 2521 | <b>2382,5</b> |
| PCBP2     | NaN      | 1,129497  | <b>1,129497</b>  | NaN  | 1638 | <b>1638</b>   |
| DCTN1     | 0,51121  | 1,748452  | <b>1,129831</b>  | 1398 | 1245 | <b>1321,5</b> |
| WDR64     | 1,615615 | 0,644147  | <b>1,129881</b>  | 1219 | 1762 | <b>1490,5</b> |
| DSC1      | 1,679052 | 0,580923  | <b>1,1299875</b> | 1387 | 2236 | <b>1811,5</b> |
| MIDN      | 0,625421 | 1,635763  | <b>1,130592</b>  | 1111 | 1396 | <b>1253,5</b> |
| PLD1      | 1,131038 | 1,130278  | <b>1,130658</b>  | 1737 | 2804 | <b>2270,5</b> |
| ZRANB2    | 1,130908 | NaN       | <b>1,130908</b>  | 1163 | NaN  | <b>1163</b>   |
| FGR       | 1,139454 | 1,122653  | <b>1,1310535</b> | 1593 | 1904 | <b>1748,5</b> |
| LDHD      | 1,361122 | 0,901951  | <b>1,1315365</b> | 1646 | 2401 | <b>2023,5</b> |

|          |          |           |                  |      |      |               |
|----------|----------|-----------|------------------|------|------|---------------|
| SNX27    | 1,250177 | 1,013689  | <b>1,131933</b>  | 1804 | 1867 | <b>1835,5</b> |
| OASL     | NaN      | 1,132354  | <b>1,132354</b>  | NaN  | 2589 | <b>2589</b>   |
| REG1A    | 1,377987 | 0,887274  | <b>1,1326305</b> | 1170 | 1811 | <b>1490,5</b> |
| PALB2    | 1,258676 | 1,006707  | <b>1,1326915</b> | 1750 | 1950 | <b>1850</b>   |
| FLJ33360 | 1,133022 | NaN       | <b>1,133022</b>  | 1917 | NaN  | <b>1917</b>   |
| C1orf198 | 0,512481 | 1,753576  | <b>1,1330285</b> | 1387 | 2738 | <b>2062,5</b> |
| CCDC65   | 1,134217 | NaN       | <b>1,134217</b>  | 1815 | NaN  | <b>1815</b>   |
| OOEP     | 0,903205 | 1,366337  | <b>1,134771</b>  | 1343 | 1867 | <b>1605</b>   |
| ARHGEF1  | 1,134873 | NaN       | <b>1,134873</b>  | 1667 | NaN  | <b>1667</b>   |
| C9orf72  | 1,97961  | 0,290136  | <b>1,134873</b>  | 1942 | 2536 | <b>2239</b>   |
| KDM6A    | 1,134963 | NaN       | <b>1,134963</b>  | 546  | NaN  | <b>546</b>    |
| NFE2L3   | 0,669479 | 1,600806  | <b>1,1351425</b> | 1457 | 2370 | <b>1913,5</b> |
| SERINC3  | 1,604493 | 0,666708  | <b>1,1356005</b> | 1820 | 2141 | <b>1980,5</b> |
| KLHL3    | 1,0995   | 1,173366  | <b>1,136433</b>  | 2129 | 2476 | <b>2302,5</b> |
| BBS5     | 2,099453 | 0,173592  | <b>1,1365225</b> | 1243 | 1727 | <b>1485</b>   |
| MSRB3    | 2,393048 | -0,118619 | <b>1,1372145</b> | 1497 | 2763 | <b>2130</b>   |
| CCDC67   | 1,13791  | NaN       | <b>1,13791</b>   | 1490 | NaN  | <b>1490</b>   |
| SLC19A2  | 2,66786  | -0,391548 | <b>1,138156</b>  | 1449 | 2270 | <b>1859,5</b> |
| BZW1     | 0,972804 | 1,303567  | <b>1,1381855</b> | 1724 | 1721 | <b>1722,5</b> |
| C5orf24  | 1,733133 | 0,544452  | <b>1,1387925</b> | 1519 | 2828 | <b>2173,5</b> |
| ORMDL3   | 0,534042 | 1,743691  | <b>1,1388665</b> | 818  | 1038 | <b>928</b>    |
| SLC27A3  | NaN      | 1,138884  | <b>1,138884</b>  | NaN  | 1877 | <b>1877</b>   |
| HIVEP1   | 1,871264 | 0,407465  | <b>1,1393645</b> | 1576 | 2556 | <b>2066</b>   |
| KCNK10   | 1,633657 | 0,645237  | <b>1,139447</b>  | 1832 | 2154 | <b>1993</b>   |
| AADA4L4  | 1,139857 | NaN       | <b>1,139857</b>  | 1519 | NaN  | <b>1519</b>   |
| ASB15    | 1,157456 | 1,122679  | <b>1,1400675</b> | 1729 | 2507 | <b>2118</b>   |
| LRP11    | 1,140068 | NaN       | <b>1,140068</b>  | 1641 | NaN  | <b>1641</b>   |
| COPS8    | 1,141082 | NaN       | <b>1,141082</b>  | 1056 | NaN  | <b>1056</b>   |
| PHTF2    | 1,535765 | 0,747876  | <b>1,1418205</b> | 680  | 2138 | <b>1409</b>   |
| CTF1     | 2,542373 | -0,256008 | <b>1,1431825</b> | 1253 | 2175 | <b>1714</b>   |
| ECI1     | 0,516994 | 1,769899  | <b>1,1434465</b> | 1716 | 1612 | <b>1664</b>   |
| NPFF     | 1,540647 | 0,747638  | <b>1,1441425</b> | 1444 | 1807 | <b>1625,5</b> |
| FAM129A  | 1,230567 | 1,058032  | <b>1,1442995</b> | 1591 | 1837 | <b>1714</b>   |
| CEP57L1  | 0,742706 | 1,547314  | <b>1,14501</b>   | 1787 | 2357 | <b>2072</b>   |

|          |          |           |                  |      |      |               |
|----------|----------|-----------|------------------|------|------|---------------|
| HDGF     | 0,845458 | 1,444644  | <b>1,145051</b>  | 1832 | 2093 | <b>1962,5</b> |
| SH3TC2   | 1,48041  | 0,810433  | <b>1,1454215</b> | 1976 | 2520 | <b>2248</b>   |
| ZBTB41   | 1,145533 | NaN       | <b>1,145533</b>  | 1316 | NaN  | <b>1316</b>   |
| EPPK1    | 1,146043 | NaN       | <b>1,146043</b>  | 1319 | NaN  | <b>1319</b>   |
| CYTH4    | 0,869152 | 1,423088  | <b>1,14612</b>   | 2370 | 2276 | <b>2323</b>   |
| GSC      | 0,834047 | 1,458206  | <b>1,1461265</b> | 1519 | 2381 | <b>1950</b>   |
| ASCC2    | 0,63911  | 1,654169  | <b>1,1466395</b> | 1752 | 2494 | <b>2123</b>   |
| ALG8     | 1,565669 | 0,727835  | <b>1,146752</b>  | 1717 | 2197 | <b>1957</b>   |
| ZNF418   | 1,07997  | 1,216059  | <b>1,1480145</b> | 1913 | 2221 | <b>2067</b>   |
| C21orf58 | 0,867294 | 1,428862  | <b>1,148078</b>  | 1264 | 1297 | <b>1280,5</b> |
| GPER     | 1,148275 | NaN       | <b>1,148275</b>  | 1196 | NaN  | <b>1196</b>   |
| PRSS22   | 0,856072 | 1,44294   | <b>1,149506</b>  | 996  | 1930 | <b>1463</b>   |
| PRSS58   | 1,62808  | 0,67138   | <b>1,14973</b>   | 1758 | 2226 | <b>1992</b>   |
| BTN1A1   | 1,693659 | 0,606703  | <b>1,150181</b>  | 1932 | 2616 | <b>2274</b>   |
| GRB10    | 1,1613   | 1,140437  | <b>1,1508685</b> | 2067 | 1778 | <b>1922,5</b> |
| OMD      | 0,421119 | 1,881128  | <b>1,1511235</b> | 1498 | 2416 | <b>1957</b>   |
| ESR2     | 1,774458 | 0,527821  | <b>1,1511395</b> | 1421 | 2262 | <b>1841,5</b> |
| IFI35    | 1,534187 | 0,768511  | <b>1,151349</b>  | 1560 | 1817 | <b>1688,5</b> |
| GIGYF1   | 1,726416 | 0,576291  | <b>1,1513535</b> | 1459 | 2116 | <b>1787,5</b> |
| PMFBP1   | 0,103138 | 2,201102  | <b>1,15212</b>   | 1760 | 2429 | <b>2094,5</b> |
| PNMA3    | 1,152443 | NaN       | <b>1,152443</b>  | 1740 | NaN  | <b>1740</b>   |
| B3GALT5  | 2,577187 | -0,271011 | <b>1,153088</b>  | 1252 | 1805 | <b>1528,5</b> |
| PNPLA6   | 0,837127 | 1,47137   | <b>1,1542485</b> | 1651 | 1873 | <b>1762</b>   |
| KIAA1324 | 2,498626 | -0,188626 | <b>1,155</b>     | 1039 | 1771 | <b>1405</b>   |
| SLN      | 1,155146 | NaN       | <b>1,155146</b>  | 1472 | NaN  | <b>1472</b>   |
| NEK6     | 1,227842 | 1,082882  | <b>1,155362</b>  | 1957 | 2145 | <b>2051</b>   |
| DDB2     | 1,15383  | 1,157582  | <b>1,155706</b>  | 1457 | 1930 | <b>1693,5</b> |
| C19orf42 | 1,155834 | NaN       | <b>1,155834</b>  | 2000 | NaN  | <b>2000</b>   |
| ERBB2    | 1,015676 | 1,296113  | <b>1,1558945</b> | 1969 | 1695 | <b>1832</b>   |
| NRSN2    | 0,216513 | 2,09532   | <b>1,1559165</b> | 1928 | 2033 | <b>1980,5</b> |
| LAD1     | 1,357318 | 0,9548    | <b>1,156059</b>  | 1446 | 1666 | <b>1556</b>   |
| ARHGAP44 | 0,651081 | 1,661141  | <b>1,156111</b>  | 1509 | 1818 | <b>1663,5</b> |
| CD7      | 1,156132 | NaN       | <b>1,156132</b>  | 1816 | NaN  | <b>1816</b>   |
| ANKRD53  | 1,321744 | 0,992731  | <b>1,1572375</b> | 1684 | 2013 | <b>1848,5</b> |

|           |          |          |                  |      |      |               |
|-----------|----------|----------|------------------|------|------|---------------|
| TULP3     | 1,158677 | NaN      | <b>1,158677</b>  | 2317 | NaN  | <b>2317</b>   |
| C11orf42  | 1,158833 | NaN      | <b>1,158833</b>  | 1428 | NaN  | <b>1428</b>   |
| FLYWCH2   | 1,106394 | 1,211983 | <b>1,1591885</b> | 1398 | 1427 | <b>1412,5</b> |
| RGS11     | 1,756152 | 0,563395 | <b>1,1597735</b> | 1300 | 1808 | <b>1554</b>   |
| TTLL12    | 0,550549 | 1,769113 | <b>1,159831</b>  | 1489 | 2175 | <b>1832</b>   |
| ANO4      | 1,821646 | 0,498366 | <b>1,160006</b>  | 2316 | 2141 | <b>2228,5</b> |
| ADAMTS1   | 1,565472 | 0,755163 | <b>1,1603175</b> | 1408 | 1803 | <b>1605,5</b> |
| GLB1      | 1,510835 | 0,809848 | <b>1,1603415</b> | 1703 | 3222 | <b>2462,5</b> |
| PIK3CD    | 0,461802 | 1,859231 | <b>1,1605165</b> | 1312 | 2086 | <b>1699</b>   |
| GAK       | 0,774639 | 1,547085 | <b>1,160862</b>  | 2043 | 1800 | <b>1921,5</b> |
| GALK1     | 0,931536 | 1,391698 | <b>1,161617</b>  | 1801 | 2191 | <b>1996</b>   |
| MICAL2    | 1,6471   | 0,676352 | <b>1,161726</b>  | 262  | 1169 | <b>715,5</b>  |
| SOST      | 1,373826 | 0,951349 | <b>1,1625875</b> | 1423 | 1871 | <b>1647</b>   |
| C1orf162  | 1,163952 | NaN      | <b>1,163952</b>  | 1665 | NaN  | <b>1665</b>   |
| NLRP9     | 0,956037 | 1,372308 | <b>1,1641725</b> | 1542 | 2085 | <b>1813,5</b> |
| SCD5      | 2,29004  | 0,039072 | <b>1,164556</b>  | 1211 | 1932 | <b>1571,5</b> |
| SMARCD3   | 2,014521 | 0,316505 | <b>1,165513</b>  | 1288 | 1974 | <b>1631</b>   |
| HMGB2     | 1,812377 | 0,518659 | <b>1,165518</b>  | 1240 | 1382 | <b>1311</b>   |
| IER2      | 1,165772 | NaN      | <b>1,165772</b>  | 1345 | NaN  | <b>1345</b>   |
| GNRHR     | 1,438378 | 0,893745 | <b>1,1660615</b> | 2157 | 2454 | <b>2305,5</b> |
| RBMS2     | 1,586323 | 0,747236 | <b>1,1667795</b> | 1526 | 2292 | <b>1909</b>   |
| C17orf108 | 0,275662 | 2,057996 | <b>1,166829</b>  | 1622 | 1766 | <b>1694</b>   |
| PZP       | 1,168192 | NaN      | <b>1,168192</b>  | 1585 | NaN  | <b>1585</b>   |
| SLC6A11   | 1,777553 | 0,558963 | <b>1,168258</b>  | 1515 | 2001 | <b>1758</b>   |
| HTR6      | 1,168328 | NaN      | <b>1,168328</b>  | 1086 | NaN  | <b>1086</b>   |
| ACE2      | 0,470432 | 1,866925 | <b>1,1686785</b> | 1901 | 2566 | <b>2233,5</b> |
| MTCH1     | 1,16877  | NaN      | <b>1,16877</b>   | 1464 | NaN  | <b>1464</b>   |
| KLHL8     | 1,025304 | 1,312539 | <b>1,1689215</b> | 2186 | 1884 | <b>2035</b>   |
| CRYGC     | 1,265174 | 1,073418 | <b>1,169296</b>  | 1656 | 2499 | <b>2077,5</b> |
| DNAJC10   | 1,254373 | 1,085095 | <b>1,169734</b>  | 1606 | 2367 | <b>1986,5</b> |
| RPS4Y2    | 1,170159 | NaN      | <b>1,170159</b>  | 1282 | NaN  | <b>1282</b>   |
| ZNF81     | 1,819343 | 0,52193  | <b>1,1706365</b> | 2183 | 2079 | <b>2131</b>   |
| ZFP36L1   | 1,08625  | 1,25563  | <b>1,17094</b>   | 1532 | 1367 | <b>1449,5</b> |
| C1orf135  | 1,798347 | 0,543816 | <b>1,1710815</b> | 1748 | 1845 | <b>1796,5</b> |

|          |           |          |                  |      |      |               |
|----------|-----------|----------|------------------|------|------|---------------|
| TBC1D8   | 1,171406  | NaN      | <b>1,171406</b>  | 1435 | NaN  | <b>1435</b>   |
| XKR7     | 1,172633  | NaN      | <b>1,172633</b>  | 1372 | NaN  | <b>1372</b>   |
| C17orf82 | 1,1728    | NaN      | <b>1,1728</b>    | 1344 | NaN  | <b>1344</b>   |
| SLC37A1  | 1,116942  | 1,229345 | <b>1,1731435</b> | 1299 | 1801 | <b>1550</b>   |
| SH3GL2   | -0,072262 | 2,419549 | <b>1,1736435</b> | 1735 | 2163 | <b>1949</b>   |
| QSOX1    | 0,843534  | 1,503886 | <b>1,17371</b>   | 1339 | 1207 | <b>1273</b>   |
| PDIA2    | 1,313893  | 1,034961 | <b>1,174427</b>  | 1822 | 2089 | <b>1955,5</b> |
| PUS1     | 1,716255  | 0,632727 | <b>1,174491</b>  | 1674 | 2228 | <b>1951</b>   |
| ILKAP    | 1,090852  | 1,260328 | <b>1,17559</b>   | 1474 | 2038 | <b>1756</b>   |
| UBL5     | 1,995456  | 0,35678  | <b>1,176118</b>  | 696  | 1185 | <b>940,5</b>  |
| C3orf38  | 1,176877  | NaN      | <b>1,176877</b>  | 2196 | NaN  | <b>2196</b>   |
| ANXA7    | 2,162381  | 0,1918   | <b>1,1770905</b> | 1553 | 2007 | <b>1780</b>   |
| PCDH1    | 0,991885  | 1,362809 | <b>1,177347</b>  | 1657 | 1806 | <b>1731,5</b> |
| TADA2A   | 1,659234  | 0,695806 | <b>1,17752</b>   | 1471 | 1924 | <b>1697,5</b> |
| WNT9B    | 1,101487  | 1,254343 | <b>1,177915</b>  | 1447 | 1678 | <b>1562,5</b> |
| SEMA3E   | 0,983062  | 1,373177 | <b>1,1781195</b> | 2131 | 2349 | <b>2240</b>   |
| PHF16    | 1,375316  | 0,981178 | <b>1,178247</b>  | 1807 | 2308 | <b>2057,5</b> |
| C1orf116 | 1,178638  | NaN      | <b>1,178638</b>  | 1384 | NaN  | <b>1384</b>   |
| MFSD4    | 1,178877  | NaN      | <b>1,178877</b>  | 1677 | NaN  | <b>1677</b>   |
| ANO8     | 1,179415  | NaN      | <b>1,179415</b>  | 2040 | NaN  | <b>2040</b>   |
| RRAGA    | NaN       | 1,180089 | <b>1,180089</b>  | NaN  | 3220 | <b>3220</b>   |
| VAMP8    | 1,025633  | 1,334974 | <b>1,1803035</b> | 1580 | 2006 | <b>1793</b>   |
| WDR75    | 1,672878  | 0,687769 | <b>1,1803235</b> | 1262 | 1599 | <b>1430,5</b> |
| HM13     | 1,97395   | 0,388977 | <b>1,1814635</b> | 1545 | 1942 | <b>1743,5</b> |
| TM2D3    | 1,194403  | 1,169123 | <b>1,181763</b>  | 1506 | 1882 | <b>1694</b>   |
| EAF2     | 0,846726  | 1,517113 | <b>1,1819195</b> | 2148 | 2338 | <b>2243</b>   |
| KRT26    | 1,123792  | 1,241014 | <b>1,182403</b>  | 1489 | 2298 | <b>1893,5</b> |
| C21orf91 | 0,274056  | 2,091471 | <b>1,1827635</b> | 1291 | 1955 | <b>1623</b>   |
| GLP2R    | 1,330148  | 1,035682 | <b>1,182915</b>  | 1115 | 1759 | <b>1437</b>   |
| TPCN2    | 1,789017  | 0,577391 | <b>1,183204</b>  | 1508 | 1836 | <b>1672</b>   |
| ABCA13   | 1,865856  | 0,501552 | <b>1,183704</b>  | 2017 | 2279 | <b>2148</b>   |
| HPGDS    | 1,411902  | 0,955672 | <b>1,183787</b>  | 1896 | 2198 | <b>2047</b>   |
| DRAM1    | 1,18412   | NaN      | <b>1,18412</b>   | 2026 | NaN  | <b>2026</b>   |
| ATP5J    | -0,524749 | 2,894655 | <b>1,184953</b>  | 1270 | 2222 | <b>1746</b>   |



|          |          |          |                  |      |      |               |
|----------|----------|----------|------------------|------|------|---------------|
| PLCB3    | 0,765303 | 1,6058   | <b>1,1855515</b> | 1255 | 1998 | <b>1626,5</b> |
| ZNF434   | 1,552137 | 0,821772 | <b>1,1869545</b> | 1556 | 2269 | <b>1912,5</b> |
| SUN1     | 1,187144 | NaN      | <b>1,187144</b>  | 1246 | NaN  | <b>1246</b>   |
| SPEG     | 0,95536  | 1,41938  | <b>1,18737</b>   | 1812 | 1800 | <b>1806</b>   |
| CAB39    | 1,047991 | 1,327449 | <b>1,18772</b>   | 1690 | 2792 | <b>2241</b>   |
| NUP153   | 1,931545 | 0,445595 | <b>1,18857</b>   | 1419 | 1222 | <b>1320,5</b> |
| LRRC31   | 0,88567  | 1,492949 | <b>1,1893095</b> | 1817 | 1741 | <b>1779</b>   |
| SFI1     | 1,054245 | 1,324789 | <b>1,189517</b>  | 1729 | 1742 | <b>1735,5</b> |
| C3orf52  | 1,189574 | NaN      | <b>1,189574</b>  | 1832 | NaN  | <b>1832</b>   |
| DYRK4    | 0,864497 | 1,515789 | <b>1,190143</b>  | 2473 | 2120 | <b>2296,5</b> |
| KLHL13   | 0,756697 | 1,623648 | <b>1,1901725</b> | 1666 | 2192 | <b>1929</b>   |
| ZNF277   | 2,06581  | 0,315145 | <b>1,1904775</b> | 1580 | 1609 | <b>1594,5</b> |
| TTBK1    | 1,120891 | 1,260388 | <b>1,1906395</b> | 2049 | 2179 | <b>2114</b>   |
| MAT1A    | 0,280814 | 2,101005 | <b>1,1909095</b> | 1945 | 3167 | <b>2556</b>   |
| INSR     | 0,690941 | 1,691591 | <b>1,191266</b>  | 1106 | 1954 | <b>1530</b>   |
| MCM10    | 0,562928 | 1,82045  | <b>1,191689</b>  | 1003 | 1256 | <b>1129,5</b> |
| UPK2     | 1,38364  | 1,000807 | <b>1,1922235</b> | 1670 | 1699 | <b>1684,5</b> |
| RPA4     | 1,175634 | 1,209178 | <b>1,192406</b>  | 1832 | 2492 | <b>2162</b>   |
| KIAA1456 | 0,969384 | 1,417996 | <b>1,19369</b>   | 1416 | 1225 | <b>1320,5</b> |
| FRMD4A   | 1,194086 | NaN      | <b>1,194086</b>  | 1691 | NaN  | <b>1691</b>   |
| SFR1     | 1,620081 | 0,768985 | <b>1,194533</b>  | 1736 | 1561 | <b>1648,5</b> |
| STK35    | 0,184029 | 2,205107 | <b>1,194568</b>  | 2034 | 1933 | <b>1983,5</b> |
| TRIM44   | 0,976544 | 1,413148 | <b>1,194846</b>  | 1071 | 1866 | <b>1468,5</b> |
| NRGN     | 1,453575 | 0,936807 | <b>1,195191</b>  | 1777 | 1938 | <b>1857,5</b> |
| SP140    | 1,268905 | 1,121588 | <b>1,1952465</b> | 1751 | 2402 | <b>2076,5</b> |
| PANK4    | 1,219951 | 1,170673 | <b>1,195312</b>  | 985  | 1135 | <b>1060</b>   |
| OR9K2    | 1,155484 | 1,235385 | <b>1,1954345</b> | 1314 | 2564 | <b>1939</b>   |
| TTC9C    | 2,053708 | 0,337539 | <b>1,1956235</b> | 1487 | 2225 | <b>1856</b>   |
| LYPD5    | 1,19625  | NaN      | <b>1,19625</b>   | 1678 | NaN  | <b>1678</b>   |
| SEMG2    | 1,196867 | NaN      | <b>1,196867</b>  | 1680 | NaN  | <b>1680</b>   |
| TOM1L2   | 1,117152 | 1,278195 | <b>1,1976735</b> | 2149 | 3393 | <b>2771</b>   |
| MRPS6    | 1,92028  | 0,476045 | <b>1,1981625</b> | 1806 | 1785 | <b>1795,5</b> |
| C19orf56 | 1,198372 | NaN      | <b>1,198372</b>  | 1655 | NaN  | <b>1655</b>   |
| C17orf77 | 1,538341 | 0,859786 | <b>1,1990635</b> | 1811 | 2140 | <b>1975,5</b> |

|          |           |          |                  |      |      |               |
|----------|-----------|----------|------------------|------|------|---------------|
| C1orf56  | 1,199212  | NaN      | <b>1,199212</b>  | 1759 | NaN  | <b>1759</b>   |
| TMPRSS4  | 0,858864  | 1,540443 | <b>1,1996535</b> | 1234 | 2120 | <b>1677</b>   |
| PARM1    | 1,121546  | 1,278043 | <b>1,1997945</b> | 1911 | 2361 | <b>2136</b>   |
| NAMPT    | 1,287561  | 1,112146 | <b>1,1998535</b> | 1604 | 2096 | <b>1850</b>   |
| NUCKS1   | 1,284384  | 1,115476 | <b>1,19993</b>   | 1634 | 1565 | <b>1599,5</b> |
| TMEM165  | -0,429333 | 2,830528 | <b>1,2005975</b> | 1416 | 1940 | <b>1678</b>   |
| ULK2     | 1,365026  | 1,037149 | <b>1,2010875</b> | 2221 | 2315 | <b>2268</b>   |
| NDNF     | 1,201226  | NaN      | <b>1,201226</b>  | 1668 | NaN  | <b>1668</b>   |
| FAM176A  | 1,201648  | NaN      | <b>1,201648</b>  | 1347 | NaN  | <b>1347</b>   |
| CERS3    | 1,204851  | NaN      | <b>1,204851</b>  | 1654 | NaN  | <b>1654</b>   |
| HS3ST3A1 | 1,760762  | 0,649242 | <b>1,205002</b>  | 1640 | 1883 | <b>1761,5</b> |
| TM2D2    | 1,227579  | 1,185232 | <b>1,2064055</b> | 1519 | 2494 | <b>2006,5</b> |
| TMEM87B  | 1,206727  | NaN      | <b>1,206727</b>  | 1260 | NaN  | <b>1260</b>   |
| MKRN3    | 0,708642  | 1,705942 | <b>1,207292</b>  | 1849 | 2721 | <b>2285</b>   |
| HS6ST3   | 1,021467  | 1,393182 | <b>1,2073245</b> | 1642 | 2195 | <b>1918,5</b> |
| WDR61    | 0,653788  | 1,762113 | <b>1,2079505</b> | 1679 | 2243 | <b>1961</b>   |
| MYO15A   | 1,860416  | 0,5558   | <b>1,208108</b>  | 1828 | 3062 | <b>2445</b>   |
| CYP2S1   | NaN       | 1,208228 | <b>1,208228</b>  | NaN  | 2402 | <b>2402</b>   |
| EYA4     | 1,199093  | 1,218619 | <b>1,208856</b>  | 1446 | 2295 | <b>1870,5</b> |
| MAD2L2   | 0,988513  | 1,429451 | <b>1,208982</b>  | 937  | 2118 | <b>1527,5</b> |
| CPT1A    | 1,778002  | 0,640868 | <b>1,209435</b>  | 1962 | 1756 | <b>1859</b>   |
| LRCH3    | 1,209646  | NaN      | <b>1,209646</b>  | 1792 | NaN  | <b>1792</b>   |
| SRSF8    | 2,127553  | 0,292022 | <b>1,2097875</b> | 1615 | 1790 | <b>1702,5</b> |
| ARRDC2   | 1,322746  | 1,096873 | <b>1,2098095</b> | 1121 | 1590 | <b>1355,5</b> |
| SEMA4A   | 0,645757  | 1,773867 | <b>1,209812</b>  | 781  | 1434 | <b>1107,5</b> |
| C7       | 0,720463  | 1,700031 | <b>1,210247</b>  | 1974 | 1902 | <b>1938</b>   |
| RAD21    | NaN       | 1,210413 | <b>1,210413</b>  | NaN  | 1428 | <b>1428</b>   |
| CETN2    | 1,03578   | 1,385288 | <b>1,210534</b>  | 1259 | 1787 | <b>1523</b>   |
| TPD52    | 1,402946  | 1,018485 | <b>1,2107155</b> | 1818 | 2068 | <b>1943</b>   |
| AFTPH    | 1,448032  | 0,974293 | <b>1,2111625</b> | 1676 | 1995 | <b>1835,5</b> |
| SLC26A4  | 0,435673  | 1,98668  | <b>1,2111765</b> | 1488 | 1999 | <b>1743,5</b> |
| PFDN5    | 1,341062  | 1,081537 | <b>1,2112995</b> | 1247 | 1795 | <b>1521</b>   |
| OR6C68   | 1,893027  | 0,529857 | <b>1,211442</b>  | 1959 | 2552 | <b>2255,5</b> |
| USP13    | 1,945997  | 0,478194 | <b>1,2120955</b> | 1927 | 2066 | <b>1996,5</b> |

|          |          |          |                  |      |      |               |
|----------|----------|----------|------------------|------|------|---------------|
| C9orf163 | 1,212691 | NaN      | <b>1,212691</b>  | 1546 | NaN  | <b>1546</b>   |
| SF3A2    | 0,017517 | 2,40875  | <b>1,2131335</b> | 957  | 967  | <b>962</b>    |
| PTBP1    | 0,743558 | 1,68281  | <b>1,213184</b>  | 1442 | 1747 | <b>1594,5</b> |
| C14orf50 | 1,213212 | NaN      | <b>1,213212</b>  | 1699 | NaN  | <b>1699</b>   |
| FAM70A   | 1,213403 | NaN      | <b>1,213403</b>  | 1605 | NaN  | <b>1605</b>   |
| FAT4     | 1,323237 | 1,103771 | <b>1,213504</b>  | 1685 | 1691 | <b>1688</b>   |
| RASSF2   | 0,878917 | 1,54911  | <b>1,2140135</b> | 1244 | 1918 | <b>1581</b>   |
| INPP4A   | 1,497302 | 0,931422 | <b>1,214362</b>  | 1174 | 2230 | <b>1702</b>   |
| TEX101   | 1,214423 | NaN      | <b>1,214423</b>  | 1770 | NaN  | <b>1770</b>   |
| SNX4     | 0,9194   | 1,509901 | <b>1,2146505</b> | 1234 | 2028 | <b>1631</b>   |
| CRYBA4   | 1,539663 | 0,89042  | <b>1,2150415</b> | 1135 | 1708 | <b>1421,5</b> |
| HPS6     | 0,866086 | 1,56575  | <b>1,215918</b>  | 1624 | 1939 | <b>1781,5</b> |
| ADAM29   | 1,42005  | 1,012686 | <b>1,216368</b>  | 1419 | 1643 | <b>1531</b>   |
| ANKRD45  | 1,216632 | NaN      | <b>1,216632</b>  | 1848 | NaN  | <b>1848</b>   |
| GBP5     | 1,216793 | NaN      | <b>1,216793</b>  | 1561 | NaN  | <b>1561</b>   |
| TSSK1B   | 0,700506 | 1,733132 | <b>1,216819</b>  | 2365 | 2303 | <b>2334</b>   |
| VSTM4    | 1,740856 | 0,693067 | <b>1,2169615</b> | 1681 | 1907 | <b>1794</b>   |
| IL22RA1  | 1,063298 | 1,370795 | <b>1,2170465</b> | 1692 | 1621 | <b>1656,5</b> |
| MMP16    | 0,454597 | 1,980017 | <b>1,217307</b>  | 1931 | 2374 | <b>2152,5</b> |
| GAR1     | 0,89486  | 1,540416 | <b>1,217638</b>  | 1532 | 2287 | <b>1909,5</b> |
| BPIFB2   | 1,266252 | 1,170707 | <b>1,2184795</b> | 1656 | 2743 | <b>2199,5</b> |
| SRCAP    | 1,494597 | 0,942701 | <b>1,218649</b>  | 1717 | 2316 | <b>2016,5</b> |
| RABL3    | 1,218656 | NaN      | <b>1,218656</b>  | 1970 | NaN  | <b>1970</b>   |
| TNFRSF25 | 1,751707 | 0,685687 | <b>1,218697</b>  | 1268 | 2266 | <b>1767</b>   |
| CRHR1    | 1,219141 | NaN      | <b>1,219141</b>  | 1683 | NaN  | <b>1683</b>   |
| EIF3B    | 2,173818 | 0,266688 | <b>1,220253</b>  | 1839 | 2001 | <b>1920</b>   |
| C18orf54 | 1,009051 | 1,43162  | <b>1,2203355</b> | 1840 | 1840 | <b>1840</b>   |
| SURF1    | 0,622225 | 1,818499 | <b>1,220362</b>  | 1695 | 2351 | <b>2023</b>   |
| GH2      | 1,546532 | 0,894235 | <b>1,2203835</b> | 1532 | 2243 | <b>1887,5</b> |
| STAT4    | 0,947454 | 1,496586 | <b>1,22202</b>   | 2086 | 2048 | <b>2067</b>   |
| MT4      | 0,703611 | 1,741016 | <b>1,2223135</b> | 1853 | 1959 | <b>1906</b>   |
| ZNF383   | 2,134089 | 0,310603 | <b>1,222346</b>  | 875  | 1887 | <b>1381</b>   |
| C5orf51  | 1,222459 | NaN      | <b>1,222459</b>  | 1645 | NaN  | <b>1645</b>   |
| TMEM175  | 0,784414 | 1,660538 | <b>1,222476</b>  | 1586 | 1919 | <b>1752,5</b> |

|          |           |           |                  |      |      |               |
|----------|-----------|-----------|------------------|------|------|---------------|
| ESPN     | 0,986886  | 1,459193  | <b>1,2230395</b> | 1193 | 1518 | <b>1355,5</b> |
| EDEM2    | 1,048714  | 1,39837   | <b>1,223542</b>  | 1688 | 1852 | <b>1770</b>   |
| PEX5L    | 1,405112  | 1,042258  | <b>1,223685</b>  | 1991 | 2013 | <b>2002</b>   |
| TACO1    | 1,224051  | NaN       | <b>1,224051</b>  | 1853 | NaN  | <b>1853</b>   |
| CXCL6    | 1,193641  | 1,255004  | <b>1,2243225</b> | 1818 | 2191 | <b>2004,5</b> |
| SYS1     | 1,30648   | 1,142911  | <b>1,2246955</b> | 2101 | 2319 | <b>2210</b>   |
| RELN     | 1,486701  | 0,963373  | <b>1,225037</b>  | 1637 | 1001 | <b>1319</b>   |
| LSM4     | 1,444489  | 1,005893  | <b>1,225191</b>  | 1127 | 1480 | <b>1303,5</b> |
| ENTPD3   | 1,920815  | 0,529716  | <b>1,2252655</b> | 888  | 1326 | <b>1107</b>   |
| CX3CR1   | 1,225614  | NaN       | <b>1,225614</b>  | 1926 | NaN  | <b>1926</b>   |
| CD2BP2   | -0,001186 | 2,454713  | <b>1,2267635</b> | 1771 | 2007 | <b>1889</b>   |
| CD46     | 0,89701   | 1,556584  | <b>1,226797</b>  | 751  | 1470 | <b>1110,5</b> |
| KLHL7    | 1,356243  | 1,098139  | <b>1,227191</b>  | 1399 | 1889 | <b>1644</b>   |
| A2ML1    | 0,119782  | 2,33721   | <b>1,228496</b>  | 1554 | 2174 | <b>1864</b>   |
| SVIL     | 1,039107  | 1,419125  | <b>1,229116</b>  | 1486 | 2271 | <b>1878,5</b> |
| KLHL34   | 1,29646   | 1,162313  | <b>1,2293865</b> | 1645 | 1653 | <b>1649</b>   |
| DAB1     | 0,910206  | 1,549234  | <b>1,22972</b>   | 1879 | 2593 | <b>2236</b>   |
| AP1S2    | 1,230493  | NaN       | <b>1,230493</b>  | 1350 | NaN  | <b>1350</b>   |
| FBXO11   | 3,114337  | -0,65292  | <b>1,2307085</b> | 981  | 1991 | <b>1486</b>   |
| E2F8     | 1,2653    | 1,196444  | <b>1,230872</b>  | 1916 | 1752 | <b>1834</b>   |
| RFX6     | 1,231219  | NaN       | <b>1,231219</b>  | 1684 | NaN  | <b>1684</b>   |
| KCNA5    | 0,923808  | 1,539052  | <b>1,23143</b>   | 2128 | 2525 | <b>2326,5</b> |
| C11orf88 | 1,056408  | 1,40685   | <b>1,231629</b>  | 1802 | 2698 | <b>2250</b>   |
| SENP1    | 1,698925  | 0,76487   | <b>1,2318975</b> | 2225 | 2101 | <b>2163</b>   |
| DDX1     | 0,217886  | 2,246163  | <b>1,2320245</b> | 1522 | 1228 | <b>1375</b>   |
| ARL6IP1  | 1,232527  | NaN       | <b>1,232527</b>  | 1517 | NaN  | <b>1517</b>   |
| SMG5     | 1,476744  | 0,989298  | <b>1,233021</b>  | 1842 | 2575 | <b>2208,5</b> |
| PRORS1P  | 0,847596  | 1,618517  | <b>1,2330565</b> | 1260 | 1788 | <b>1524</b>   |
| LRRC43   | 1,233248  | NaN       | <b>1,233248</b>  | 1664 | NaN  | <b>1664</b>   |
| BTG2     | 2,499158  | -0,028075 | <b>1,2355415</b> | 1404 | 1467 | <b>1435,5</b> |
| SPATA13  | 1,348834  | 1,122632  | <b>1,235733</b>  | 1504 | 2076 | <b>1790</b>   |
| ZNF48    | 1,513971  | 0,960886  | <b>1,2374285</b> | 1585 | 2021 | <b>1803</b>   |
| SP6      | 1,238121  | NaN       | <b>1,238121</b>  | 1433 | NaN  | <b>1433</b>   |
| CDH24    | 1,238354  | NaN       | <b>1,238354</b>  | 1472 | NaN  | <b>1472</b>   |

|          |           |          |                  |      |      |               |
|----------|-----------|----------|------------------|------|------|---------------|
| ZNF174   | 1,467926  | 1,009223 | <b>1,2385745</b> | 1302 | 1362 | <b>1332</b>   |
| COLEC10  | 1,478368  | 0,999041 | <b>1,2387045</b> | 2043 | 1748 | <b>1895,5</b> |
| NPHS1    | 1,238786  | NaN      | <b>1,238786</b>  | 1825 | NaN  | <b>1825</b>   |
| OR111    | 1,37996   | 1,097941 | <b>1,2389505</b> | 1494 | 2148 | <b>1821</b>   |
| PCDHB4   | 0,450785  | 2,029623 | <b>1,240204</b>  | 1789 | 1866 | <b>1827,5</b> |
| NLRP6    | 1,2405    | NaN      | <b>1,2405</b>    | 1549 | NaN  | <b>1549</b>   |
| PRR7     | 0,712444  | 1,769338 | <b>1,240891</b>  | 1630 | 1885 | <b>1757,5</b> |
| LYPD4    | 1,761611  | 0,721431 | <b>1,241521</b>  | 1547 | 2290 | <b>1918,5</b> |
| YTHDF1   | 1,03393   | 1,452468 | <b>1,243199</b>  | 1551 | 1244 | <b>1397,5</b> |
| ZNF677   | 1,24527   | NaN      | <b>1,24527</b>   | 1452 | NaN  | <b>1452</b>   |
| TPRKB    | 1,245418  | NaN      | <b>1,245418</b>  | 1574 | NaN  | <b>1574</b>   |
| LYZL4    | 0,898067  | 1,593621 | <b>1,245844</b>  | 1342 | 1575 | <b>1458,5</b> |
| CNKSRS3  | 2,273379  | 0,219377 | <b>1,246378</b>  | 1247 | 1737 | <b>1492</b>   |
| NLRP2    | 1,381043  | 1,111931 | <b>1,246487</b>  | 1358 | 2331 | <b>1844,5</b> |
| OR5A2    | 1,284161  | 1,209106 | <b>1,2466335</b> | 1593 | 2325 | <b>1959</b>   |
| DGAT2L6  | 1,264883  | 1,228945 | <b>1,246914</b>  | 1663 | 2207 | <b>1935</b>   |
| ADPGK    | 1,202152  | 1,291738 | <b>1,246945</b>  | 2479 | 2728 | <b>2603,5</b> |
| SUPT4H1  | 1,289959  | 1,20417  | <b>1,2470645</b> | 1602 | 2023 | <b>1812,5</b> |
| CARHSP1  | 0,914998  | 1,579581 | <b>1,2472895</b> | 1750 | 2480 | <b>2115</b>   |
| SGTA     | 0,748306  | 1,747441 | <b>1,2478735</b> | 1576 | 2114 | <b>1845</b>   |
| A4GNT    | 0,718139  | 1,778075 | <b>1,248107</b>  | 1281 | 1764 | <b>1522,5</b> |
| PEX10    | 1,34049   | 1,157199 | <b>1,2488445</b> | 1009 | 1502 | <b>1255,5</b> |
| CDK5RAP3 | 1,249838  | NaN      | <b>1,249838</b>  | 1277 | NaN  | <b>1277</b>   |
| PANX1    | 1,066201  | 1,436974 | <b>1,2515875</b> | 1854 | 1680 | <b>1767</b>   |
| FAU      | 1,378343  | 1,125234 | <b>1,2517885</b> | 1029 | 1214 | <b>1121,5</b> |
| TMEM218  | 1,252653  | NaN      | <b>1,252653</b>  | 1704 | NaN  | <b>1704</b>   |
| EPHB6    | 1,115974  | 1,390082 | <b>1,253028</b>  | 1551 | 1500 | <b>1525,5</b> |
| ECE2     | 2,592903  | -0,08609 | <b>1,2534065</b> | 1397 | 2308 | <b>1852,5</b> |
| C9orf170 | 1,952635  | 0,555128 | <b>1,2538815</b> | 1670 | 2178 | <b>1924</b>   |
| ZCCHC17  | 1,25444   | NaN      | <b>1,25444</b>   | 1422 | NaN  | <b>1422</b>   |
| ACTR1B   | 1,596277  | 0,912911 | <b>1,254594</b>  | 1784 | 1887 | <b>1835,5</b> |
| L1TD1    | 1,102736  | 1,407904 | <b>1,25532</b>   | 2271 | 2345 | <b>2308</b>   |
| RHOXF1   | 1,255425  | NaN      | <b>1,255425</b>  | 1613 | NaN  | <b>1613</b>   |
| SEC61G   | -0,982943 | 3,494284 | <b>1,2556705</b> | 1386 | 1647 | <b>1516,5</b> |

|         |          |          |                  |      |      |               |
|---------|----------|----------|------------------|------|------|---------------|
| HERC4   | 1,980352 | 0,533665 | <b>1,2570085</b> | 1780 | 2664 | <b>2222</b>   |
| B3GAT1  | 2,090219 | 0,426469 | <b>1,258344</b>  | 1568 | 2572 | <b>2070</b>   |
| BEAN1   | 1,127843 | 1,38937  | <b>1,2586065</b> | 1703 | 1931 | <b>1817</b>   |
| CCL20   | 1,729901 | 0,787826 | <b>1,2588635</b> | 1529 | 2519 | <b>2024</b>   |
| SPRR1A  | 1,25942  | NaN      | <b>1,25942</b>   | 1500 | NaN  | <b>1500</b>   |
| ELANE   | 1,755134 | 0,76582  | <b>1,260477</b>  | 1671 | 2202 | <b>1936,5</b> |
| HFE2    | 0,50983  | 2,011315 | <b>1,2605725</b> | 1602 | 2803 | <b>2202,5</b> |
| DNAH12  | 1,260658 | NaN      | <b>1,260658</b>  | 1829 | NaN  | <b>1829</b>   |
| CEP112  | 2,009001 | 0,51243  | <b>1,2607155</b> | 1709 | 2138 | <b>1923,5</b> |
| OR14I1  | 1,135669 | 1,386239 | <b>1,260954</b>  | 1673 | 2192 | <b>1932,5</b> |
| ATF2    | 0,7171   | 1,805036 | <b>1,261068</b>  | 1137 | 1638 | <b>1387,5</b> |
| SUZ12   | 1,55629  | 0,966985 | <b>1,2616375</b> | 1510 | 1996 | <b>1753</b>   |
| OSBP2   | 1,438915 | 1,084651 | <b>1,261783</b>  | 1986 | 2485 | <b>2235,5</b> |
| NBPF7   | 1,301679 | 1,222878 | <b>1,2622785</b> | 1612 | 1696 | <b>1654</b>   |
| SIK3    | 1,513728 | 1,0139   | <b>1,263814</b>  | 1775 | 1769 | <b>1772</b>   |
| CACYBP  | 1,576546 | 0,951764 | <b>1,264155</b>  | 1759 | 2318 | <b>2038,5</b> |
| OR14A16 | 1,111656 | 1,417376 | <b>1,264516</b>  | 2077 | 2522 | <b>2299,5</b> |
| RBM17   | 1,470908 | 1,059066 | <b>1,264987</b>  | 1738 | 2979 | <b>2358,5</b> |
| RSPO3   | 1,265074 | NaN      | <b>1,265074</b>  | 1902 | NaN  | <b>1902</b>   |
| ZNF354A | NaN      | 1,266465 | <b>1,266465</b>  | NaN  | 2785 | <b>2785</b>   |
| PPP2R5D | 0,519443 | 2,014385 | <b>1,266914</b>  | 1312 | 1900 | <b>1606</b>   |
| DDX26B  | 1,143461 | 1,392918 | <b>1,2681895</b> | 970  | 2333 | <b>1651,5</b> |
| COQ10A  | 1,269281 | NaN      | <b>1,269281</b>  | 1781 | NaN  | <b>1781</b>   |
| COL5A3  | 1,294698 | 1,244009 | <b>1,2693535</b> | 1608 | 2545 | <b>2076,5</b> |
| PRSS8   | 1,149618 | 1,391058 | <b>1,270338</b>  | 1456 | 2100 | <b>1778</b>   |
| ASS1    | 2,262797 | 0,277978 | <b>1,2703875</b> | 1544 | 1949 | <b>1746,5</b> |
| ATP4B   | 1,76869  | 0,773022 | <b>1,270856</b>  | 1803 | 1586 | <b>1694,5</b> |
| CTSW    | 0,971068 | 1,572307 | <b>1,2716875</b> | 1874 | 2106 | <b>1990</b>   |
| TARSL2  | 1,657596 | 0,885841 | <b>1,2717185</b> | 2201 | 1640 | <b>1920,5</b> |
| ESAM    | 1,616916 | 0,928351 | <b>1,2726335</b> | 1964 | 2190 | <b>2077</b>   |
| RBM39   | 0,093549 | 2,452885 | <b>1,273217</b>  | 968  | 732  | <b>850</b>    |
| SLC6A9  | 2,003692 | 0,543031 | <b>1,2733615</b> | 1459 | 2423 | <b>1941</b>   |
| LAP3    | 0,624304 | 1,922963 | <b>1,2736335</b> | 760  | 1479 | <b>1119,5</b> |
| AOC2    | 1,502483 | 1,045045 | <b>1,273764</b>  | 2011 | 2512 | <b>2261,5</b> |

|           |          |           |                  |      |      |               |
|-----------|----------|-----------|------------------|------|------|---------------|
| NDUFA8    | 2,673807 | -0,126208 | <b>1,2737995</b> | 1234 | 1169 | <b>1201,5</b> |
| MYLK2     | 1,462324 | 1,086011  | <b>1,2741675</b> | 1226 | 1760 | <b>1493</b>   |
| RARG      | 1,290198 | 1,260796  | <b>1,275497</b>  | 864  | 1852 | <b>1358</b>   |
| FAM102B   | 1,275595 | NaN       | <b>1,275595</b>  | 1213 | NaN  | <b>1213</b>   |
| CHRNA6    | 1,472525 | 1,079334  | <b>1,2759295</b> | 2696 | 2690 | <b>2693</b>   |
| RXFP3     | 1,224726 | 1,327296  | <b>1,276011</b>  | 1376 | 1700 | <b>1538</b>   |
| RIMBP2    | 1,532658 | 1,020284  | <b>1,276471</b>  | 1227 | 1416 | <b>1321,5</b> |
| PPP1R9B   | 1,091606 | 1,462951  | <b>1,2772785</b> | 1860 | 2033 | <b>1946,5</b> |
| NDUFA4L2  | 2,915943 | -0,360457 | <b>1,277743</b>  | 1219 | 2459 | <b>1839</b>   |
| OR10H4    | 1,047359 | 1,509082  | <b>1,2782205</b> | 2207 | 2568 | <b>2387,5</b> |
| LRRC49    | 1,666546 | 0,890401  | <b>1,2784735</b> | 1704 | 2580 | <b>2142</b>   |
| FAM154B   | 1,266084 | 1,292229  | <b>1,2791565</b> | 2088 | 3152 | <b>2620</b>   |
| FGG       | 1,748243 | 0,811586  | <b>1,2799145</b> | 1377 | 1528 | <b>1452,5</b> |
| FBLN5     | 1,280311 | NaN       | <b>1,280311</b>  | 1624 | NaN  | <b>1624</b>   |
| SMYD5     | 1,202283 | 1,360813  | <b>1,281548</b>  | 1491 | 1965 | <b>1728</b>   |
| BAIAP3    | 0,602581 | 1,96261   | <b>1,2825955</b> | 1304 | 1470 | <b>1387</b>   |
| RSPH6A    | 2,221332 | 0,346839  | <b>1,2840855</b> | 1806 | 1889 | <b>1847,5</b> |
| MAFB      | 1,284122 | NaN       | <b>1,284122</b>  | 996  | NaN  | <b>996</b>    |
| C9orf153  | 1,284198 | NaN       | <b>1,284198</b>  | 1404 | NaN  | <b>1404</b>   |
| POU5F2    | 0,74019  | 1,82898   | <b>1,284585</b>  | 1569 | 1833 | <b>1701</b>   |
| TSPAN17   | 1,658971 | 0,913507  | <b>1,286239</b>  | 1541 | 2517 | <b>2029</b>   |
| PNPLA8    | 0,287618 | 2,284959  | <b>1,2862885</b> | 1698 | 1886 | <b>1792</b>   |
| SERINC5   | 0,942291 | 1,631712  | <b>1,2870015</b> | 1909 | 2248 | <b>2078,5</b> |
| ALDH8A1   | 1,082219 | 1,491871  | <b>1,287045</b>  | 1333 | 1890 | <b>1611,5</b> |
| ENPP1     | 1,057177 | 1,51707   | <b>1,2871235</b> | 1905 | 2408 | <b>2156,5</b> |
| XYLT1     | 1,457816 | 1,117112  | <b>1,287464</b>  | 1869 | 2518 | <b>2193,5</b> |
| CACNG7    | 2,439718 | 0,135316  | <b>1,287517</b>  | 1731 | 2514 | <b>2122,5</b> |
| APOL6     | 1,538269 | 1,039111  | <b>1,28869</b>   | 1915 | 2269 | <b>2092</b>   |
| NUDT15    | 1,699628 | 0,878071  | <b>1,2888495</b> | 1572 | 2336 | <b>1954</b>   |
| NDUFA9    | 2,318    | 0,260451  | <b>1,2892255</b> | 1471 | 2313 | <b>1892</b>   |
| HRAS      | 1,533835 | 1,045321  | <b>1,289578</b>  | 1736 | 2027 | <b>1881,5</b> |
| CFD       | 1,870649 | 0,708851  | <b>1,28975</b>   | 1660 | 1883 | <b>1771,5</b> |
| KRTAP12-2 | 0,135031 | 2,444646  | <b>1,2898385</b> | 1864 | 2215 | <b>2039,5</b> |
| TEX12     | 1,291234 | NaN       | <b>1,291234</b>  | 1839 | NaN  | <b>1839</b>   |

|           |          |           |                  |      |      |               |
|-----------|----------|-----------|------------------|------|------|---------------|
| TSPAN31   | 2,127795 | 0,454789  | <b>1,291292</b>  | 2249 | 2070 | <b>2159,5</b> |
| SHARPIN   | 1,521853 | 1,062272  | <b>1,2920625</b> | 1304 | 1592 | <b>1448</b>   |
| WDTC1     | 1,912433 | 0,671732  | <b>1,2920825</b> | 1506 | 1590 | <b>1548</b>   |
| C6orf226  | 2,037635 | 0,548071  | <b>1,292853</b>  | 1454 | 1475 | <b>1464,5</b> |
| YPEL3     | 1,292989 | NaN       | <b>1,292989</b>  | 1657 | NaN  | <b>1657</b>   |
| UHMK1     | 1,240178 | 1,347416  | <b>1,293797</b>  | 2058 | 2393 | <b>2225,5</b> |
| HDHD3     | 1,031929 | 1,558249  | <b>1,295089</b>  | 1064 | 1211 | <b>1137,5</b> |
| PCSK2     | 0,809174 | 1,78109   | <b>1,295132</b>  | 1177 | 1763 | <b>1470</b>   |
| LITAF     | 0,072588 | 2,518352  | <b>1,29547</b>   | 1279 | 2239 | <b>1759</b>   |
| OSTBETA   | 1,295572 | NaN       | <b>1,295572</b>  | 1559 | NaN  | <b>1559</b>   |
| ZYG11B    | 1,133277 | 1,458423  | <b>1,29585</b>   | 2031 | 2190 | <b>2110,5</b> |
| SUMO4     | 2,18428  | 0,411609  | <b>1,2979445</b> | 1804 | 1718 | <b>1761</b>   |
| PRCC      | 1,776487 | 0,820676  | <b>1,2985815</b> | 1509 | 1989 | <b>1749</b>   |
| PHF7      | 2,491917 | 0,105301  | <b>1,298609</b>  | 1495 | 2563 | <b>2029</b>   |
| LDB3      | 1,29913  | NaN       | <b>1,29913</b>   | 1540 | NaN  | <b>1540</b>   |
| HJURP     | 1,299394 | NaN       | <b>1,299394</b>  | 1874 | NaN  | <b>1874</b>   |
| FAM129C   | 1,299962 | NaN       | <b>1,299962</b>  | 1421 | NaN  | <b>1421</b>   |
| DIO3      | 1,154912 | 1,445804  | <b>1,300358</b>  | 1396 | 2011 | <b>1703,5</b> |
| TCEB3B    | 1,495153 | 1,106769  | <b>1,300961</b>  | 2001 | 2219 | <b>2110</b>   |
| SLFN13    | 1,311149 | 1,290939  | <b>1,301044</b>  | 1857 | 2098 | <b>1977,5</b> |
| RPS7      | 1,787341 | 0,816317  | <b>1,301829</b>  | 1094 | 1230 | <b>1162</b>   |
| IP6K2     | 1,50163  | 1,102336  | <b>1,301983</b>  | 1587 | 1665 | <b>1626</b>   |
| IBTK      | 0,672573 | 1,931775  | <b>1,302174</b>  | 1271 | 1713 | <b>1492</b>   |
| SMAD5     | 1,951873 | 0,653031  | <b>1,302452</b>  | 1553 | 1771 | <b>1662</b>   |
| CRTC3     | 0,917853 | 1,688177  | <b>1,303015</b>  | 1148 | 2038 | <b>1593</b>   |
| ZNF271    | 1,7385   | 0,868919  | <b>1,3037095</b> | 1282 | 1370 | <b>1326</b>   |
| KLHL28    | 1,177765 | 1,431744  | <b>1,3047545</b> | 2060 | 2430 | <b>2245</b>   |
| CACNG6    | 0,812899 | 1,796699  | <b>1,304799</b>  | 1782 | 2307 | <b>2044,5</b> |
| C14orf129 | 1,38771  | 1,223575  | <b>1,3056425</b> | 1572 | 1763 | <b>1667,5</b> |
| BCCIP     | 3,423058 | -0,809727 | <b>1,3066655</b> | 1580 | 2517 | <b>2048,5</b> |
| UCMA      | 1,720555 | 0,895227  | <b>1,307891</b>  | 1478 | 1792 | <b>1635</b>   |
| LMTK3     | 0,9345   | 1,681351  | <b>1,3079255</b> | 1873 | 2522 | <b>2197,5</b> |
| CYSLTR2   | 1,30842  | NaN       | <b>1,30842</b>   | 1538 | NaN  | <b>1538</b>   |
| AHSG      | 1,583677 | 1,034653  | <b>1,309165</b>  | 1465 | 1909 | <b>1687</b>   |



|           |           |           |                  |      |      |               |
|-----------|-----------|-----------|------------------|------|------|---------------|
| ANUBL1    | 1,309507  | NaN       | <b>1,309507</b>  | 1732 | NaN  | <b>1732</b>   |
| AGTR2     | 1,310438  | NaN       | <b>1,310438</b>  | 1929 | NaN  | <b>1929</b>   |
| ABCA6     | 1,730456  | 0,892538  | <b>1,311497</b>  | 2118 | 3086 | <b>2602</b>   |
| VSIG4     | 2,952968  | -0,327537 | <b>1,3127155</b> | 1564 | 2215 | <b>1889,5</b> |
| OR11H4    | 0,208844  | 2,417336  | <b>1,31309</b>   | 1789 | 1527 | <b>1658</b>   |
| PARN      | 1,062397  | 1,563856  | <b>1,3131265</b> | 1520 | 2475 | <b>1997,5</b> |
| STK36     | 0,709087  | 1,917685  | <b>1,313386</b>  | 1799 | 1549 | <b>1674</b>   |
| TIFA      | 1,356497  | 1,270508  | <b>1,3135025</b> | 1401 | 2436 | <b>1918,5</b> |
| PPM1K     | 1,092121  | 1,535307  | <b>1,313714</b>  | 1611 | 2531 | <b>2071</b>   |
| ERO1LB    | 1,313843  | NaN       | <b>1,313843</b>  | 1352 | NaN  | <b>1352</b>   |
| MOS       | 1,501945  | 1,125943  | <b>1,313944</b>  | 1474 | 2093 | <b>1783,5</b> |
| HELLS     | 1,623082  | 1,004976  | <b>1,314029</b>  | 1604 | 1864 | <b>1734</b>   |
| USP46     | 1,549709  | 1,079213  | <b>1,314461</b>  | 1846 | 1430 | <b>1638</b>   |
| GALNT14   | 1,193202  | 1,436538  | <b>1,31487</b>   | 1790 | 2062 | <b>1926</b>   |
| UCK1      | 1,294879  | 1,335496  | <b>1,3151875</b> | 1340 | 1969 | <b>1654,5</b> |
| SAP30BP   | NaN       | 1,315909  | <b>1,315909</b>  | NaN  | 1492 | <b>1492</b>   |
| C14orf166 | 0,30625   | 2,325771  | <b>1,3160105</b> | 1662 | 1974 | <b>1818</b>   |
| ZNF324    | 1,590915  | 1,041798  | <b>1,3163565</b> | 1105 | 1804 | <b>1454,5</b> |
| RLN3      | 1,664993  | 0,97187   | <b>1,3184315</b> | 1465 | 1835 | <b>1650</b>   |
| CCDC72    | 1,318492  | NaN       | <b>1,318492</b>  | 906  | NaN  | <b>906</b>    |
| FAM19A3   | 0,586203  | 2,051565  | <b>1,318884</b>  | 1764 | 1831 | <b>1797,5</b> |
| ARHGDI8   | 0,880791  | 1,757529  | <b>1,31916</b>   | 1598 | 1818 | <b>1708</b>   |
| KIAA0664  | 0,638046  | 2,000954  | <b>1,3195</b>    | 1647 | 2689 | <b>2168</b>   |
| RUSC1     | -0,439284 | 3,079662  | <b>1,320189</b>  | 1444 | 2011 | <b>1727,5</b> |
| RAD50     | 1,400678  | 1,242291  | <b>1,3214845</b> | 1825 | 2054 | <b>1939,5</b> |
| DNAJA1    | 1,554116  | 1,08934   | <b>1,321728</b>  | 1862 | 1942 | <b>1902</b>   |
| GNA15     | 2,234644  | 0,412011  | <b>1,3233275</b> | 1263 | 2016 | <b>1639,5</b> |
| EXOC3L4   | 1,207537  | 1,440052  | <b>1,3237945</b> | 1793 | 1696 | <b>1744,5</b> |
| RAI14     | 1,64327   | 1,004489  | <b>1,3238795</b> | 1854 | 2160 | <b>2007</b>   |
| DPY30     | 1,313852  | 1,334784  | <b>1,324318</b>  | 1873 | 2423 | <b>2148</b>   |
| GPR158    | 1,325035  | NaN       | <b>1,325035</b>  | 1665 | NaN  | <b>1665</b>   |
| ESF1      | 1,60513   | 1,045723  | <b>1,3254265</b> | 1152 | 1340 | <b>1246</b>   |
| CDCA3     | 1,325497  | NaN       | <b>1,325497</b>  | 1651 | NaN  | <b>1651</b>   |
| COBLL1    | 1,632875  | 1,018587  | <b>1,325731</b>  | 1948 | 2116 | <b>2032</b>   |

|          |          |          |                  |      |      |               |
|----------|----------|----------|------------------|------|------|---------------|
| FAM196B  | 1,223978 | 1,428399 | <b>1,3261885</b> | 1171 | 1723 | <b>1447</b>   |
| CXXC1    | 1,256385 | 1,396367 | <b>1,326376</b>  | 1373 | 1684 | <b>1528,5</b> |
| HCFC1    | NaN      | 1,326629 | <b>1,326629</b>  | NaN  | 2332 | <b>2332</b>   |
| PCK2     | 0,886368 | 1,767385 | <b>1,3268765</b> | 1045 | 1743 | <b>1394</b>   |
| SPINK5   | 1,66866  | 0,985641 | <b>1,3271505</b> | 1726 | 2039 | <b>1882,5</b> |
| KRT4     | 0,959808 | 1,695463 | <b>1,3276355</b> | 1795 | 2797 | <b>2296</b>   |
| SH3BP1   | 1,142796 | 1,512704 | <b>1,32775</b>   | 1334 | 1517 | <b>1425,5</b> |
| SLC35E4  | 0,14265  | 2,512887 | <b>1,3277685</b> | 1332 | 1536 | <b>1434</b>   |
| RBM23    | 0,970783 | 1,68515  | <b>1,3279665</b> | 1683 | 3037 | <b>2360</b>   |
| SH3RF3   | 1,710817 | 0,9454   | <b>1,3281085</b> | 1859 | 2724 | <b>2291,5</b> |
| GRM5     | 1,328419 | NaN      | <b>1,328419</b>  | 2021 | NaN  | <b>2021</b>   |
| SERPINE2 | 2,128872 | 0,528548 | <b>1,32871</b>   | 1519 | 1618 | <b>1568,5</b> |
| ITM2A    | 1,399167 | 1,260207 | <b>1,329687</b>  | 1702 | 2107 | <b>1904,5</b> |
| FIBIN    | 1,677782 | 0,982828 | <b>1,330305</b>  | 1725 | 2384 | <b>2054,5</b> |
| SKP1     | 1,619483 | 1,043209 | <b>1,331346</b>  | 1717 | 2345 | <b>2031</b>   |
| LRP8     | 1,643656 | 1,019521 | <b>1,3315885</b> | 1645 | 1801 | <b>1723</b>   |
| UBE2E2   | 0,267438 | 2,396495 | <b>1,3319665</b> | 1328 | 2290 | <b>1809</b>   |
| LPAR4    | 1,332593 | NaN      | <b>1,332593</b>  | 1697 | NaN  | <b>1697</b>   |
| KPNA4    | 1,033466 | 1,632555 | <b>1,3330105</b> | 1360 | 1989 | <b>1674,5</b> |
| UTP11L   | 1,994644 | 0,671727 | <b>1,3331855</b> | 821  | 1731 | <b>1276</b>   |
| NME9     | 1,337527 | 1,329251 | <b>1,333389</b>  | 1753 | 2219 | <b>1986</b>   |
| NAP1L4   | 1,56428  | 1,104583 | <b>1,3344315</b> | 1500 | 2026 | <b>1763</b>   |
| TRIM9    | 0,755848 | 1,915978 | <b>1,335913</b>  | 1501 | 1767 | <b>1634</b>   |
| GALNTL1  | NaN      | 1,33636  | <b>1,33636</b>   | NaN  | 1667 | <b>1667</b>   |
| IFT122   | 0,875629 | 1,801087 | <b>1,338358</b>  | 1589 | 2187 | <b>1888</b>   |
| CSF1R    | 1,273089 | 1,404784 | <b>1,3389365</b> | 1464 | 2201 | <b>1832,5</b> |
| CACNA1C  | 1,734443 | 0,943767 | <b>1,339105</b>  | 1890 | 2702 | <b>2296</b>   |
| FAM135B  | 1,339445 | NaN      | <b>1,339445</b>  | 2043 | NaN  | <b>2043</b>   |
| FAM50A   | 1,493797 | 1,18519  | <b>1,3394935</b> | 2024 | 2208 | <b>2116</b>   |
| CACNB2   | 0,86805  | 1,811173 | <b>1,3396115</b> | 1735 | 2769 | <b>2252</b>   |
| PLCXD2   | 0,319254 | 2,362201 | <b>1,3407275</b> | 1428 | 1963 | <b>1695,5</b> |
| EDN1     | 1,238629 | 1,44529  | <b>1,3419595</b> | 1648 | 1949 | <b>1798,5</b> |
| ZBTB42   | 1,344484 | NaN      | <b>1,344484</b>  | 1725 | NaN  | <b>1725</b>   |
| COX7A1   | 1,344769 | NaN      | <b>1,344769</b>  | 1851 | NaN  | <b>1851</b>   |

|          |          |          |                  |      |      |               |
|----------|----------|----------|------------------|------|------|---------------|
| FRMD6    | 1,344773 | NaN      | <b>1,344773</b>  | 1514 | NaN  | <b>1514</b>   |
| BIN2     | 1,642976 | 1,047744 | <b>1,34536</b>   | 2028 | 2276 | <b>2152</b>   |
| TKTL2    | 1,030295 | 1,662939 | <b>1,346617</b>  | 1511 | 1363 | <b>1437</b>   |
| SFT2D2   | 1,723059 | 0,970413 | <b>1,346736</b>  | 1444 | 2079 | <b>1761,5</b> |
| PSMD1    | 1,347506 | NaN      | <b>1,347506</b>  | 626  | NaN  | <b>626</b>    |
| OR6Y1    | 1,347721 | NaN      | <b>1,347721</b>  | 1391 | NaN  | <b>1391</b>   |
| GPR153   | 1,349486 | NaN      | <b>1,349486</b>  | 1160 | NaN  | <b>1160</b>   |
| CHST14   | 1,271153 | 1,428115 | <b>1,349634</b>  | 1496 | 2102 | <b>1799</b>   |
| ANAPC5   | NaN      | 1,34964  | <b>1,34964</b>   | NaN  | 2473 | <b>2473</b>   |
| MORN4    | 2,174461 | 0,524951 | <b>1,349706</b>  | 1780 | 1629 | <b>1704,5</b> |
| CCNI2    | 0,95533  | 1,744373 | <b>1,3498515</b> | 1716 | 2764 | <b>2240</b>   |
| SMARCB1  | 0,826829 | 1,873196 | <b>1,3500125</b> | 1288 | 1783 | <b>1535,5</b> |
| SLC39A6  | 1,372125 | 1,328499 | <b>1,350312</b>  | 2249 | 2210 | <b>2229,5</b> |
| FLI1     | 1,725614 | 0,975016 | <b>1,350315</b>  | 1301 | 1747 | <b>1524</b>   |
| LRIT3    | 1,893197 | 0,807771 | <b>1,350484</b>  | 1845 | 1950 | <b>1897,5</b> |
| C12orf34 | 1,413222 | 1,288415 | <b>1,3508185</b> | 1357 | 2516 | <b>1936,5</b> |
| CNOT1    | 1,84796  | 0,853995 | <b>1,3509775</b> | 1508 | 2029 | <b>1768,5</b> |
| VAMP5    | 1,351202 | NaN      | <b>1,351202</b>  | 1225 | NaN  | <b>1225</b>   |
| GFRA1    | 1,741428 | 0,961101 | <b>1,3512645</b> | 1257 | 2460 | <b>1858,5</b> |
| CLCN7    | 1,106926 | 1,599342 | <b>1,353134</b>  | 1605 | 2456 | <b>2030,5</b> |
| TMX4     | 0,393913 | 2,31245  | <b>1,3531815</b> | 1422 | 1862 | <b>1642</b>   |
| C2orf47  | 1,154603 | 1,553353 | <b>1,353978</b>  | 1431 | 1967 | <b>1699</b>   |
| PPP2R3C  | 2,012766 | 0,695201 | <b>1,3539835</b> | 1902 | 2299 | <b>2100,5</b> |
| OR10X1   | 1,354212 | NaN      | <b>1,354212</b>  | 1829 | NaN  | <b>1829</b>   |
| TCF23    | 0,354433 | 2,355523 | <b>1,354978</b>  | 1707 | 2029 | <b>1868</b>   |
| ALKBH2   | 1,798405 | 0,912349 | <b>1,355377</b>  | 1669 | 2789 | <b>2229</b>   |
| TUBB6    | 2,682574 | 0,029056 | <b>1,355815</b>  | 1096 | 1279 | <b>1187,5</b> |
| PHC2     | 1,120725 | 1,591678 | <b>1,3562015</b> | 863  | 1549 | <b>1206</b>   |
| SAMD9    | 1,356647 | NaN      | <b>1,356647</b>  | 1987 | NaN  | <b>1987</b>   |
| EVI2A    | 1,167035 | 1,546823 | <b>1,356929</b>  | 1610 | 2246 | <b>1928</b>   |
| TBX4     | 0,977389 | 1,736924 | <b>1,3571565</b> | 1453 | 2292 | <b>1872,5</b> |
| RFPL4B   | 1,004396 | 1,710068 | <b>1,357232</b>  | 1314 | 1919 | <b>1616,5</b> |
| DEFB113  | 1,357447 | NaN      | <b>1,357447</b>  | 1897 | NaN  | <b>1897</b>   |
| RFX3     | 2,147893 | 0,567108 | <b>1,3575005</b> | 1365 | 1573 | <b>1469</b>   |

|            |          |          |                  |      |      |               |
|------------|----------|----------|------------------|------|------|---------------|
| 05-mars    | 1,009249 | 1,706151 | <b>1,3577</b>    | 1232 | 2055 | <b>1643,5</b> |
| TIPRL      | 1,275193 | 1,440939 | <b>1,358066</b>  | 1663 | 1957 | <b>1810</b>   |
| ZNF250     | 1,683067 | 1,033068 | <b>1,3580675</b> | 1921 | 2547 | <b>2234</b>   |
| KIF13B     | 0,355037 | 2,362616 | <b>1,3588265</b> | 1588 | 1687 | <b>1637,5</b> |
| IRAK1      | 1,595929 | 1,122081 | <b>1,359005</b>  | 1103 | 1409 | <b>1256</b>   |
| CASR       | 1,35962  | NaN      | <b>1,35962</b>   | 2106 | NaN  | <b>2106</b>   |
| SOCS5      | 2,019646 | 0,701169 | <b>1,3604075</b> | 1974 | 2673 | <b>2323,5</b> |
| ACAD10     | 1,678501 | 1,044301 | <b>1,361401</b>  | 1300 | 1932 | <b>1616</b>   |
| CSGALNACT1 | 2,111155 | 0,611817 | <b>1,361486</b>  | 2129 | 2038 | <b>2083,5</b> |
| FCER2      | NaN      | 1,362098 | <b>1,362098</b>  | NaN  | 2263 | <b>2263</b>   |
| OR2T27     | 2,064579 | 0,660037 | <b>1,362308</b>  | 1765 | 2212 | <b>1988,5</b> |
| SASH3      | 1,850051 | 0,874586 | <b>1,3623185</b> | 2187 | 2098 | <b>2142,5</b> |
| DLX2       | NaN      | 1,362382 | <b>1,362382</b>  | NaN  | 2172 | <b>2172</b>   |
| RASSF6     | 2,105534 | 0,619713 | <b>1,3626235</b> | 1439 | 1871 | <b>1655</b>   |
| SRSF1      | 0,62778  | 2,1018   | <b>1,36479</b>   | 1563 | 1398 | <b>1480,5</b> |
| TBX5       | 1,602762 | 1,127399 | <b>1,3650805</b> | 1552 | 2044 | <b>1798</b>   |
| HORMAD1    | 0,413    | 2,317248 | <b>1,365124</b>  | 1992 | 2177 | <b>2084,5</b> |
| EMG1       | 1,365546 | NaN      | <b>1,365546</b>  | 1153 | NaN  | <b>1153</b>   |
| TRIM33     | 0,586514 | 2,1451   | <b>1,365807</b>  | 1871 | 2590 | <b>2230,5</b> |
| KIF20A     | 1,803573 | 0,928199 | <b>1,365886</b>  | 819  | 1050 | <b>934,5</b>  |
| OGFR       | 2,025372 | 0,707829 | <b>1,3666005</b> | 1344 | 1665 | <b>1504,5</b> |
| KPNA5      | 1,758431 | 0,976244 | <b>1,3673375</b> | 1818 | 2701 | <b>2259,5</b> |
| DEFB114    | 0,915226 | 1,820286 | <b>1,367756</b>  | 1209 | 1849 | <b>1529</b>   |
| NTM        | 1,242478 | 1,493594 | <b>1,368036</b>  | 1712 | 2230 | <b>1971</b>   |
| TRIP11     | 1,615932 | 1,123749 | <b>1,3698405</b> | 2057 | 2219 | <b>2138</b>   |
| CSE1L      | 1,038825 | 1,700987 | <b>1,369906</b>  | 1766 | 2177 | <b>1971,5</b> |
| DSN1       | 1,462048 | 1,278558 | <b>1,370303</b>  | 2021 | 2025 | <b>2023</b>   |
| OR10A7     | 1,52447  | 1,2162   | <b>1,370335</b>  | 1638 | 2213 | <b>1925,5</b> |
| FYTTD1     | 0,96539  | 1,775791 | <b>1,3705905</b> | 1778 | 2177 | <b>1977,5</b> |
| COMMD1     | 0,976294 | 1,76491  | <b>1,370602</b>  | 1753 | 2039 | <b>1896</b>   |
| MEX3C      | 1,358294 | 1,383139 | <b>1,3707165</b> | 1603 | 2947 | <b>2275</b>   |
| DIAPH3     | NaN      | 1,371322 | <b>1,371322</b>  | NaN  | 2708 | <b>2708</b>   |
| ARRDC3     | 0,676838 | 2,066878 | <b>1,371858</b>  | 1895 | 1876 | <b>1885,5</b> |
| PAPSS2     | 1,604235 | 1,141641 | <b>1,372938</b>  | 2148 | 2286 | <b>2217</b>   |

|          |           |          |                  |      |      |               |
|----------|-----------|----------|------------------|------|------|---------------|
| FAM76A   | 1,373058  | NaN      | <b>1,373058</b>  | 1679 | NaN  | <b>1679</b>   |
| ALDH2    | 1,665333  | 1,081281 | <b>1,373307</b>  | 2048 | 2861 | <b>2454,5</b> |
| HCRTR2   | 1,374889  | NaN      | <b>1,374889</b>  | 1539 | NaN  | <b>1539</b>   |
| CCNO     | 1,504026  | 1,246663 | <b>1,3753445</b> | 2010 | 2186 | <b>2098</b>   |
| C19orf70 | 1,375818  | NaN      | <b>1,375818</b>  | 1537 | NaN  | <b>1537</b>   |
| DACT1    | 0,849433  | 1,903422 | <b>1,3764275</b> | 1967 | 2882 | <b>2424,5</b> |
| FAM103A1 | 1,376449  | NaN      | <b>1,376449</b>  | 1740 | NaN  | <b>1740</b>   |
| FBXO45   | 1,219126  | 1,536149 | <b>1,3776375</b> | 1864 | 2652 | <b>2258</b>   |
| RAB1A    | -0,008423 | 2,765384 | <b>1,3784805</b> | 1518 | 2908 | <b>2213</b>   |
| PBLD     | 1,450505  | 1,313095 | <b>1,3818</b>    | 1490 | 1796 | <b>1643</b>   |
| BTNL3    | 1,746068  | 1,020337 | <b>1,3832025</b> | 1815 | 1944 | <b>1879,5</b> |
| CASP7    | 1,880967  | 0,888564 | <b>1,3847655</b> | 1319 | 2126 | <b>1722,5</b> |
| DOPEY1   | 1,384951  | NaN      | <b>1,384951</b>  | 2251 | NaN  | <b>2251</b>   |
| ORC6     | 1,385339  | NaN      | <b>1,385339</b>  | 1731 | NaN  | <b>1731</b>   |
| CBLN2    | 1,386131  | NaN      | <b>1,386131</b>  | 1531 | NaN  | <b>1531</b>   |
| PPA1     | 1,468619  | 1,303864 | <b>1,3862415</b> | 1392 | 1693 | <b>1542,5</b> |
| F2RL1    | 1,386407  | NaN      | <b>1,386407</b>  | 1283 | NaN  | <b>1283</b>   |
| SPSB1    | 2,139863  | 0,633054 | <b>1,3864585</b> | 1709 | 2739 | <b>2224</b>   |
| UNC45B   | 1,634365  | 1,138811 | <b>1,386588</b>  | 1646 | 1533 | <b>1589,5</b> |
| GHITM    | 1,944226  | 0,829138 | <b>1,386682</b>  | 1632 | 1852 | <b>1742</b>   |
| KIAA1161 | 1,525261  | 1,24818  | <b>1,3867205</b> | 1841 | 1864 | <b>1852,5</b> |
| TRIOBP   | 1,046797  | 1,726735 | <b>1,386766</b>  | 1757 | 2080 | <b>1918,5</b> |
| FKBP15   | 1,272615  | 1,502352 | <b>1,3874835</b> | 1284 | 1452 | <b>1368</b>   |
| SAG      | 0,863884  | 1,91361  | <b>1,388747</b>  | 1120 | 1918 | <b>1519</b>   |
| CCL23    | 1,389013  | NaN      | <b>1,389013</b>  | 1741 | NaN  | <b>1741</b>   |
| AMN      | 1,389028  | NaN      | <b>1,389028</b>  | 1618 | NaN  | <b>1618</b>   |
| FUT11    | 0,979186  | 1,799246 | <b>1,389216</b>  | 1683 | 1838 | <b>1760,5</b> |
| C13orf30 | 0,854358  | 1,925397 | <b>1,3898775</b> | 1939 | 1947 | <b>1943</b>   |
| OR6V1    | 1,38998   | NaN      | <b>1,38998</b>   | 2032 | NaN  | <b>2032</b>   |
| PODN     | 2,447387  | 0,334801 | <b>1,391094</b>  | 1911 | 1864 | <b>1887,5</b> |
| SLC39A13 | 1,150577  | 1,632638 | <b>1,3916075</b> | 1539 | 1816 | <b>1677,5</b> |
| IQCB1    | 1,392023  | NaN      | <b>1,392023</b>  | 2039 | NaN  | <b>2039</b>   |
| CHST15   | 2,478979  | 0,305292 | <b>1,3921355</b> | 1455 | 2249 | <b>1852</b>   |
| SLC12A8  | 0,923207  | 1,862148 | <b>1,3926775</b> | 2435 | 2099 | <b>2267</b>   |

|           |          |          |                  |      |      |               |
|-----------|----------|----------|------------------|------|------|---------------|
| OSBPL9    | 1,92318  | 0,865385 | <b>1,3942825</b> | 1137 | 1296 | <b>1216,5</b> |
| C16orf48  | 1,394983 | NaN      | <b>1,394983</b>  | 1934 | NaN  | <b>1934</b>   |
| ZNF417    | 1,395154 | NaN      | <b>1,395154</b>  | 1512 | NaN  | <b>1512</b>   |
| TM9SF1    | 1,121149 | 1,669284 | <b>1,3952165</b> | 1773 | 2068 | <b>1920,5</b> |
| RTN3      | 0,866841 | 1,924158 | <b>1,3954995</b> | 1704 | 1638 | <b>1671</b>   |
| MAP3K8    | 1,241816 | 1,550691 | <b>1,3962535</b> | 1991 | 2126 | <b>2058,5</b> |
| REC8      | 1,396827 | NaN      | <b>1,396827</b>  | 1697 | NaN  | <b>1697</b>   |
| TXLNG2P   | 0,837828 | 1,960105 | <b>1,3989665</b> | 1739 | 1991 | <b>1865</b>   |
| SLCO4C1   | 0,632774 | 2,165659 | <b>1,3992165</b> | 969  | 1666 | <b>1317,5</b> |
| C11orf9   | 2,078903 | 0,723289 | <b>1,401096</b>  | 2170 | 1866 | <b>2018</b>   |
| LOC646627 | 1,401453 | NaN      | <b>1,401453</b>  | 1306 | NaN  | <b>1306</b>   |
| KATNAL2   | 1,044692 | 1,765117 | <b>1,4049045</b> | 1606 | 2076 | <b>1841</b>   |
| SLC5A12   | 1,724823 | 1,085591 | <b>1,405207</b>  | 1027 | 1623 | <b>1325</b>   |
| IGFBP7    | 1,674799 | 1,138756 | <b>1,4067775</b> | 1429 | 1816 | <b>1622,5</b> |
| ALDOB     | 1,345963 | 1,468117 | <b>1,40704</b>   | 1758 | 2814 | <b>2286</b>   |
| NOC3L     | 0,991507 | 1,822649 | <b>1,407078</b>  | 2050 | 1916 | <b>1983</b>   |
| TAF5L     | 1,19794  | 1,617228 | <b>1,407584</b>  | 2402 | 2713 | <b>2557,5</b> |
| NAA38     | 0,832531 | 1,983089 | <b>1,40781</b>   | 1235 | 1211 | <b>1223</b>   |
| TMEM119   | 1,63441  | 1,181507 | <b>1,4079585</b> | 1814 | 2480 | <b>2147</b>   |
| SLC7A8    | 1,666444 | 1,150767 | <b>1,4086055</b> | 2119 | 2117 | <b>2118</b>   |
| THAP6     | 1,408864 | NaN      | <b>1,408864</b>  | 1897 | NaN  | <b>1897</b>   |
| DCAF10    | 1,409016 | NaN      | <b>1,409016</b>  | 1848 | NaN  | <b>1848</b>   |
| ARHGAP6   | 1,15086  | 1,671163 | <b>1,4110115</b> | 1403 | 2099 | <b>1751</b>   |
| RNASE10   | 0,043268 | 2,778932 | <b>1,4111</b>    | 1938 | 1866 | <b>1902</b>   |
| MFSD2B    | 0,981212 | 1,842178 | <b>1,411695</b>  | 1740 | 1978 | <b>1859</b>   |
| SREK1IP1  | 1,552444 | 1,271008 | <b>1,411726</b>  | 1756 | 2299 | <b>2027,5</b> |
| CENPE     | 0,792126 | 2,031893 | <b>1,4120095</b> | 571  | 776  | <b>673,5</b>  |
| PPP1R3F   | 1,334184 | 1,490652 | <b>1,412418</b>  | 1152 | 1195 | <b>1173,5</b> |
| RBM15B    | 2,17112  | 0,65372  | <b>1,41242</b>   | 1366 | 1925 | <b>1645,5</b> |
| SLC35D3   | 1,521853 | 1,303764 | <b>1,4128085</b> | 1350 | 1913 | <b>1631,5</b> |
| TRAF2     | 1,542085 | 1,285028 | <b>1,4135565</b> | 2031 | 3227 | <b>2629</b>   |
| C16orf78  | 1,18067  | 1,650848 | <b>1,415759</b>  | 1204 | 1703 | <b>1453,5</b> |
| SNX20     | 2,095484 | 0,736973 | <b>1,4162285</b> | 2057 | 2870 | <b>2463,5</b> |
| CD276     | 1,071135 | 1,762208 | <b>1,4166715</b> | 1892 | 1386 | <b>1639</b>   |

|          |          |          |                  |      |      |               |
|----------|----------|----------|------------------|------|------|---------------|
| OR4F6    | 1,929742 | 0,904595 | <b>1,4171685</b> | 1494 | 1923 | <b>1708,5</b> |
| BARHL1   | 1,709223 | 1,125546 | <b>1,4173845</b> | 1308 | 1175 | <b>1241,5</b> |
| ARMC9    | 1,417703 | NaN      | <b>1,417703</b>  | 1875 | NaN  | <b>1875</b>   |
| ZSWIM2   | 0,739457 | 2,09805  | <b>1,4187535</b> | 1694 | 1866 | <b>1780</b>   |
| TSKS     | 1,323159 | 1,514471 | <b>1,418815</b>  | 1850 | 2458 | <b>2154</b>   |
| RECK     | 0,921945 | 1,916221 | <b>1,419083</b>  | 1695 | 2356 | <b>2025,5</b> |
| OXCT2    | 1,190899 | 1,648053 | <b>1,419476</b>  | 1555 | 2261 | <b>1908</b>   |
| NNMT     | 0,914274 | 1,925123 | <b>1,4196985</b> | 1864 | 3167 | <b>2515,5</b> |
| ATF4     | 0,907662 | 1,93191  | <b>1,419786</b>  | 945  | 1228 | <b>1086,5</b> |
| IGSF6    | 1,212227 | 1,627394 | <b>1,4198105</b> | 1743 | 1804 | <b>1773,5</b> |
| PDZD8    | 1,420633 | NaN      | <b>1,420633</b>  | 1705 | NaN  | <b>1705</b>   |
| SKIL     | 1,726897 | 1,11586  | <b>1,4213785</b> | 1927 | 1631 | <b>1779</b>   |
| GYG1     | 1,303488 | 1,542926 | <b>1,423207</b>  | 1285 | 1843 | <b>1564</b>   |
| HDLBP    | 1,463408 | 1,383854 | <b>1,423631</b>  | 1523 | 2411 | <b>1967</b>   |
| ZNF142   | 1,54702  | 1,300408 | <b>1,423714</b>  | 1842 | 2330 | <b>2086</b>   |
| MOCS3    | 0,383333 | 2,466129 | <b>1,424731</b>  | 1341 | 1989 | <b>1665</b>   |
| ALDH3B1  | 1,234104 | 1,615717 | <b>1,4249105</b> | 1392 | 1310 | <b>1351</b>   |
| C12orf50 | 1,426092 | NaN      | <b>1,426092</b>  | 1938 | NaN  | <b>1938</b>   |
| ZNF649   | 1,727752 | 1,125041 | <b>1,4263965</b> | 1433 | 1786 | <b>1609,5</b> |
| RNF34    | 1,01692  | 1,837572 | <b>1,427246</b>  | 1653 | 2261 | <b>1957</b>   |
| EIF2AK4  | 1,909081 | 0,946091 | <b>1,427586</b>  | 1207 | 2010 | <b>1608,5</b> |
| DNAJB12  | 1,751525 | 1,104151 | <b>1,427838</b>  | 1754 | 2278 | <b>2016</b>   |
| LCE2B    | 2,106774 | 0,749326 | <b>1,42805</b>   | 1773 | 1936 | <b>1854,5</b> |
| ELN      | 1,42849  | NaN      | <b>1,42849</b>   | 1096 | NaN  | <b>1096</b>   |
| PATL1    | 1,500442 | 1,356956 | <b>1,428699</b>  | 2108 | 2262 | <b>2185</b>   |
| TMEM186  | 1,429091 | NaN      | <b>1,429091</b>  | 1831 | NaN  | <b>1831</b>   |
| KCNH3    | 2,120129 | 0,741535 | <b>1,430832</b>  | 1704 | 2095 | <b>1899,5</b> |
| SMEK1    | 1,431055 | NaN      | <b>1,431055</b>  | 1783 | NaN  | <b>1783</b>   |
| ERLEC1   | 1,56389  | 1,300709 | <b>1,4322995</b> | 1918 | 2130 | <b>2024</b>   |
| C9orf125 | 1,083199 | 1,781548 | <b>1,4323735</b> | 909  | 1644 | <b>1276,5</b> |
| MORF4L2  | 1,170806 | 1,696507 | <b>1,4336565</b> | 1636 | 1804 | <b>1720</b>   |
| LIN54    | 1,847094 | 1,020979 | <b>1,4340365</b> | 1130 | 1908 | <b>1519</b>   |
| SAMD9L   | 1,377356 | 1,490778 | <b>1,434067</b>  | 1897 | 1844 | <b>1870,5</b> |
| CLEC4F   | 1,387873 | 1,480615 | <b>1,434244</b>  | 1797 | 2941 | <b>2369</b>   |

|           |          |          |                  |      |      |               |
|-----------|----------|----------|------------------|------|------|---------------|
| JDP2      | 0,945018 | 1,923884 | <b>1,434451</b>  | 908  | 1164 | <b>1036</b>   |
| RYBP      | NaN      | 1,434974 | <b>1,434974</b>  | NaN  | 1690 | <b>1690</b>   |
| RPL22     | 2,120302 | 0,750672 | <b>1,435487</b>  | 2041 | 1819 | <b>1930</b>   |
| IQUB      | 1,436828 | NaN      | <b>1,436828</b>  | 635  | NaN  | <b>635</b>    |
| KIFC1     | 2,12472  | 0,749365 | <b>1,4370425</b> | 821  | 1568 | <b>1194,5</b> |
| TRAF3     | 0,03838  | 2,836197 | <b>1,4372885</b> | 1998 | 3017 | <b>2507,5</b> |
| SLC2A7    | 1,437376 | NaN      | <b>1,437376</b>  | 1942 | NaN  | <b>1942</b>   |
| PGBD3     | 1,874866 | 1,000461 | <b>1,4376635</b> | 1553 | 1792 | <b>1672,5</b> |
| SMTN      | 1,656796 | 1,220135 | <b>1,4384655</b> | 1532 | 1976 | <b>1754</b>   |
| TREM2     | 0,681071 | 2,196021 | <b>1,438546</b>  | 1304 | 1571 | <b>1437,5</b> |
| KLHL5     | 0,921307 | 1,956149 | <b>1,438728</b>  | 1677 | 2238 | <b>1957,5</b> |
| KCNV2     | 1,190468 | 1,68714  | <b>1,438804</b>  | 1182 | 2179 | <b>1680,5</b> |
| BMP10     | 1,04671  | 1,832633 | <b>1,4396715</b> | 746  | 892  | <b>819</b>    |
| TAF5      | 1,22792  | 1,652168 | <b>1,440044</b>  | 1901 | 2761 | <b>2331</b>   |
| DIS3      | 1,091995 | 1,788445 | <b>1,44022</b>   | 1448 | 1921 | <b>1684,5</b> |
| TOMM20    | 0,977583 | 1,904183 | <b>1,440883</b>  | 1689 | 2176 | <b>1932,5</b> |
| C15orf59  | 1,733028 | 1,150031 | <b>1,4415295</b> | 1366 | 1500 | <b>1433</b>   |
| GY2       | 1,038634 | 1,845936 | <b>1,442285</b>  | 1055 | 2003 | <b>1529</b>   |
| GPR55     | 1,352659 | 1,531923 | <b>1,442291</b>  | 1306 | 1596 | <b>1451</b>   |
| TMEM126B  | 1,666525 | 1,221246 | <b>1,4438855</b> | 2069 | 1902 | <b>1985,5</b> |
| DLGAP3    | 1,216215 | 1,672016 | <b>1,4441155</b> | 1327 | 2034 | <b>1680,5</b> |
| NXPH4     | 1,444222 | NaN      | <b>1,444222</b>  | 1947 | NaN  | <b>1947</b>   |
| PPP1R9A   | 1,890204 | 0,999425 | <b>1,4448145</b> | 1697 | 1864 | <b>1780,5</b> |
| PLEKHB2   | 0,601114 | 2,293206 | <b>1,44716</b>   | 1417 | 1708 | <b>1562,5</b> |
| NACA      | 2,446164 | 0,448671 | <b>1,4474175</b> | 290  | 752  | <b>521</b>    |
| LPAR6     | 1,041795 | 1,856068 | <b>1,4489315</b> | 1000 | 1889 | <b>1444,5</b> |
| LYPLAL1   | 1,120037 | 1,781114 | <b>1,4505755</b> | 1887 | 2873 | <b>2380</b>   |
| RGS1      | 1,451043 | NaN      | <b>1,451043</b>  | 1733 | NaN  | <b>1733</b>   |
| OSBPL6    | 1,336734 | 1,565539 | <b>1,4511365</b> | 1764 | 2286 | <b>2025</b>   |
| RAB11FIP2 | 1,451445 | NaN      | <b>1,451445</b>  | 1601 | NaN  | <b>1601</b>   |
| NT5C      | 1,445271 | 1,458647 | <b>1,451959</b>  | 1508 | 2073 | <b>1790,5</b> |
| RNF44     | 0,912002 | 1,994757 | <b>1,4533795</b> | 1836 | 2966 | <b>2401</b>   |
| PCBP1     | 0,167884 | 2,739072 | <b>1,453478</b>  | 1412 | 1878 | <b>1645</b>   |
| NCR2      | 1,171924 | 1,735417 | <b>1,4536705</b> | 1867 | 2465 | <b>2166</b>   |



|           |           |          |                  |      |      |               |
|-----------|-----------|----------|------------------|------|------|---------------|
| G6PD      | 2,220324  | 0,689522 | <b>1,454923</b>  | 823  | 1397 | <b>1110</b>   |
| GPR179    | 1,456168  | NaN      | <b>1,456168</b>  | 1783 | NaN  | <b>1783</b>   |
| RPUUSD3   | 1,039212  | 1,875332 | <b>1,457272</b>  | 1701 | 2408 | <b>2054,5</b> |
| ZKSCAN2   | 1,555812  | 1,359558 | <b>1,457685</b>  | 1280 | 1946 | <b>1613</b>   |
| SERPINB11 | 1,949385  | 0,966362 | <b>1,4578735</b> | 1755 | 2443 | <b>2099</b>   |
| MRPL14    | 1,458137  | NaN      | <b>1,458137</b>  | 1658 | NaN  | <b>1658</b>   |
| IL34      | 1,462044  | NaN      | <b>1,462044</b>  | 1826 | NaN  | <b>1826</b>   |
| GATAD2B   | 1,359066  | 1,565922 | <b>1,462494</b>  | 1579 | 1576 | <b>1577,5</b> |
| SH2B2     | 1,01501   | 1,910525 | <b>1,4627675</b> | 1751 | 2496 | <b>2123,5</b> |
| BAG3      | 1,930048  | 0,99686  | <b>1,463454</b>  | 1068 | 1702 | <b>1385</b>   |
| DCHS1     | 1,580355  | 1,347918 | <b>1,4641365</b> | 1879 | 1890 | <b>1884,5</b> |
| ASF1B     | 1,668335  | 1,262369 | <b>1,465352</b>  | 1534 | 1687 | <b>1610,5</b> |
| SLC36A1   | 1,713112  | 1,219198 | <b>1,466155</b>  | 1596 | 2049 | <b>1822,5</b> |
| STAT1     | 1,339134  | 1,593668 | <b>1,466401</b>  | 1390 | 1474 | <b>1432</b>   |
| CHPF      | 1,147517  | 1,788965 | <b>1,468241</b>  | 1991 | 2338 | <b>2164,5</b> |
| FOXA2     | 2,082606  | 0,854994 | <b>1,4688</b>    | 1667 | 1928 | <b>1797,5</b> |
| SPG7      | 1,307658  | 1,631621 | <b>1,4696395</b> | 1576 | 2299 | <b>1937,5</b> |
| ZIC4      | 1,239561  | 1,699881 | <b>1,469721</b>  | 1887 | 2012 | <b>1949,5</b> |
| RGS17     | NaN       | 1,469852 | <b>1,469852</b>  | NaN  | 2074 | <b>2074</b>   |
| CDC16     | 1,6418    | 1,299045 | <b>1,4704225</b> | 1200 | 1682 | <b>1441</b>   |
| C1orf189  | 1,473354  | NaN      | <b>1,473354</b>  | 1642 | NaN  | <b>1642</b>   |
| COL7A1    | 1,473076  | 1,476261 | <b>1,4746685</b> | 1793 | 2153 | <b>1973</b>   |
| ZNF235    | 1,475541  | NaN      | <b>1,475541</b>  | 1845 | NaN  | <b>1845</b>   |
| HTR3E     | 1,200884  | 1,751313 | <b>1,4760985</b> | 1713 | 2502 | <b>2107,5</b> |
| MADD      | -1,080133 | 4,032406 | <b>1,4761365</b> | 1683 | 1678 | <b>1680,5</b> |
| TGOLN2    | 1,295342  | 1,658187 | <b>1,4767645</b> | 1487 | 1766 | <b>1626,5</b> |
| GALM      | 1,088296  | 1,866026 | <b>1,477161</b>  | 1896 | 2564 | <b>2230</b>   |
| AHSP      | 1,477284  | NaN      | <b>1,477284</b>  | 1681 | NaN  | <b>1681</b>   |
| ENTPD4    | 1,03659   | 1,919547 | <b>1,4780685</b> | 1640 | 1874 | <b>1757</b>   |
| TXNDC3    | 2,655186  | 0,302395 | <b>1,4787905</b> | 1908 | 1906 | <b>1907</b>   |
| ADARB1    | 1,588257  | 1,37114  | <b>1,4796985</b> | 1440 | 1855 | <b>1647,5</b> |
| PPP1R2    | 1,505037  | 1,462371 | <b>1,483704</b>  | 2166 | 2122 | <b>2144</b>   |
| COMMD9    | 1,495943  | 1,475865 | <b>1,485904</b>  | 2083 | 2041 | <b>2062</b>   |
| ASCC1     | 0,786284  | 2,186866 | <b>1,486575</b>  | 1028 | 2329 | <b>1678,5</b> |

|           |           |          |                  |      |      |               |
|-----------|-----------|----------|------------------|------|------|---------------|
| LSM3      | 1,343359  | 1,630794 | <b>1,4870765</b> | 1427 | 1601 | <b>1514</b>   |
| MRE11A    | 1,876262  | 1,101849 | <b>1,4890555</b> | 1673 | 1642 | <b>1657,5</b> |
| IGFLR1    | 1,489701  | NaN      | <b>1,489701</b>  | 1377 | NaN  | <b>1377</b>   |
| SLC30A4   | 2,118847  | 0,86172  | <b>1,4902835</b> | 1736 | 3176 | <b>2456</b>   |
| IMPA2     | 1,935697  | 1,047605 | <b>1,491651</b>  | 1233 | 1952 | <b>1592,5</b> |
| HOXD11    | 1,30119   | 1,683835 | <b>1,4925125</b> | 1266 | 1670 | <b>1468</b>   |
| CD300LB   | 1,55807   | 1,427962 | <b>1,493016</b>  | 1608 | 2076 | <b>1842</b>   |
| FZD9      | 1,49394   | NaN      | <b>1,49394</b>   | 1713 | NaN  | <b>1713</b>   |
| EMILIN1   | 1,495865  | NaN      | <b>1,495865</b>  | 1405 | NaN  | <b>1405</b>   |
| SLCO6A1   | 1,910962  | 1,082201 | <b>1,4965815</b> | 1332 | 1620 | <b>1476</b>   |
| KISS1R    | 1,496807  | NaN      | <b>1,496807</b>  | 1633 | NaN  | <b>1633</b>   |
| RPUSD2    | 1,386054  | 1,609539 | <b>1,4977965</b> | 1417 | 1878 | <b>1647,5</b> |
| TAF12     | 1,048479  | 1,947271 | <b>1,497875</b>  | 1723 | 1934 | <b>1828,5</b> |
| PRMT6     | 0,433234  | 2,564468 | <b>1,498851</b>  | 1536 | 2066 | <b>1801</b>   |
| ZBTB2     | 1,500814  | NaN      | <b>1,500814</b>  | 1210 | NaN  | <b>1210</b>   |
| SIK2      | 1,27897   | 1,723487 | <b>1,5012285</b> | 1202 | 2010 | <b>1606</b>   |
| ELOVL4    | 2,080179  | 0,922666 | <b>1,5014225</b> | 1783 | 2458 | <b>2120,5</b> |
| DSCAML1   | 2,284575  | 0,718591 | <b>1,501583</b>  | 1485 | 2504 | <b>1994,5</b> |
| C9orf172  | 1,582095  | 1,421221 | <b>1,501658</b>  | 1244 | 2357 | <b>1800,5</b> |
| SLC9B1    | 0,930606  | 2,072918 | <b>1,501762</b>  | 1943 | 2044 | <b>1993,5</b> |
| CCDC113   | 1,502118  | NaN      | <b>1,502118</b>  | 2247 | NaN  | <b>2247</b>   |
| NKTR      | 1,673145  | 1,334332 | <b>1,5037385</b> | 865  | 1896 | <b>1380,5</b> |
| TMEM27    | 1,560058  | 1,447521 | <b>1,5037895</b> | 1911 | 1782 | <b>1846,5</b> |
| SAMD5     | 1,50416   | NaN      | <b>1,50416</b>   | 1456 | NaN  | <b>1456</b>   |
| SPTSSB    | 0,93132   | 2,079142 | <b>1,505231</b>  | 1822 | 2420 | <b>2121</b>   |
| FAM124B   | 1,33977   | 1,671677 | <b>1,5057235</b> | 2165 | 2386 | <b>2275,5</b> |
| C11orf57  | 1,748077  | 1,263959 | <b>1,506018</b>  | 1860 | 1988 | <b>1924</b>   |
| PCSK1     | 1,608333  | 1,403924 | <b>1,5061285</b> | 2206 | 2372 | <b>2289</b>   |
| ADAMTS19  | -0,009653 | 3,023256 | <b>1,5068015</b> | 1603 | 1922 | <b>1762,5</b> |
| CLN5      | 1,080895  | 1,9424   | <b>1,5116475</b> | 1359 | 1306 | <b>1332,5</b> |
| ProSAPiP1 | 1,51214   | NaN      | <b>1,51214</b>   | 1612 | NaN  | <b>1612</b>   |
| KIAA1191  | 1,316834  | 1,707737 | <b>1,5122855</b> | 1096 | 1258 | <b>1177</b>   |
| TNFRSF13B | 1,981092  | 1,044399 | <b>1,5127455</b> | 1719 | 2013 | <b>1866</b>   |
| BTF3      | 0,20484   | 2,820695 | <b>1,5127675</b> | 1139 | 1412 | <b>1275,5</b> |

|          |           |           |                  |      |      |               |
|----------|-----------|-----------|------------------|------|------|---------------|
| PKD1L1   | 1,504423  | 1,523788  | <b>1,5141055</b> | 1779 | 2184 | <b>1981,5</b> |
| ACOT8    | -0,093191 | 3,121427  | <b>1,514118</b>  | 1915 | 1781 | <b>1848</b>   |
| TYW5     | 1,374906  | 1,653422  | <b>1,514164</b>  | 1550 | 1734 | <b>1642</b>   |
| FAM132A  | 1,516466  | NaN       | <b>1,516466</b>  | 950  | NaN  | <b>950</b>    |
| ZNF643   | 1,147759  | 1,887253  | <b>1,517506</b>  | 1896 | 2327 | <b>2111,5</b> |
| SRP14    | 1,325122  | 1,710604  | <b>1,517863</b>  | 1359 | 1689 | <b>1524</b>   |
| CSNK1G1  | 1,288961  | 1,747349  | <b>1,518155</b>  | 1726 | 2072 | <b>1899</b>   |
| MYO6     | NaN       | 1,518814  | <b>1,518814</b>  | NaN  | 1769 | <b>1769</b>   |
| TMEM200C | 1,7581    | 1,28017   | <b>1,519135</b>  | 1366 | 1585 | <b>1475,5</b> |
| SHC2     | 1,519608  | NaN       | <b>1,519608</b>  | 1177 | NaN  | <b>1177</b>   |
| KCND3    | 1,530613  | 1,5106    | <b>1,5206065</b> | 1559 | 2073 | <b>1816</b>   |
| SNRNP25  | 0,577183  | 2,464164  | <b>1,5206735</b> | 1479 | 1802 | <b>1640,5</b> |
| IL4      | 1,773134  | 1,269185  | <b>1,5211595</b> | 1347 | 1445 | <b>1396</b>   |
| MAK16    | 1,522108  | NaN       | <b>1,522108</b>  | 1012 | NaN  | <b>1012</b>   |
| COL1A2   | 1,55004   | 1,495213  | <b>1,5226265</b> | 1777 | 2263 | <b>2020</b>   |
| C10orf26 | 1,02515   | 2,020557  | <b>1,5228535</b> | 1943 | 2197 | <b>2070</b>   |
| RHOJ     | 2,150282  | 0,896845  | <b>1,5235635</b> | 1707 | 2208 | <b>1957,5</b> |
| MEAF6    | 1,745673  | 1,301655  | <b>1,523664</b>  | 1859 | 1831 | <b>1845</b>   |
| NUDT14   | 1,276881  | 1,771026  | <b>1,5239535</b> | 2020 | 2555 | <b>2287,5</b> |
| HS1BP3   | 0,602727  | 2,446526  | <b>1,5246265</b> | 1430 | 2586 | <b>2008</b>   |
| LHFPL4   | 0,985176  | 2,065257  | <b>1,5252165</b> | 1869 | 2451 | <b>2160</b>   |
| C17orf76 | 1,52619   | NaN       | <b>1,52619</b>   | 1633 | NaN  | <b>1633</b>   |
| C16orf54 | 0,965638  | 2,087191  | <b>1,5264145</b> | 2115 | 2633 | <b>2374</b>   |
| PQLC3    | 1,52717   | NaN       | <b>1,52717</b>   | 1640 | NaN  | <b>1640</b>   |
| PRKCD    | 1,671639  | 1,382707  | <b>1,527173</b>  | 1549 | 2213 | <b>1881</b>   |
| MTMR9    | 3,109378  | -0,052694 | <b>1,528342</b>  | 1115 | 2140 | <b>1627,5</b> |
| CMIP     | 1,329923  | 1,727943  | <b>1,528933</b>  | 1727 | 1489 | <b>1608</b>   |
| PTPN2    | 1,409826  | 1,648274  | <b>1,52905</b>   | 2067 | 2387 | <b>2227</b>   |
| PCIF1    | 1,811922  | 1,246477  | <b>1,5291995</b> | 1248 | 1619 | <b>1433,5</b> |
| IFNA5    | 1,905132  | 1,153638  | <b>1,529385</b>  | 2019 | 1997 | <b>2008</b>   |
| FUK      | 2,093306  | 0,96741   | <b>1,530358</b>  | 1492 | 1438 | <b>1465</b>   |
| ARL16    | 1,531363  | NaN       | <b>1,531363</b>  | 902  | NaN  | <b>902</b>    |
| ARHGAP17 | 1,532531  | NaN       | <b>1,532531</b>  | 1827 | NaN  | <b>1827</b>   |
| MTUS1    | 1,028253  | 2,03697   | <b>1,5326115</b> | 1143 | 1840 | <b>1491,5</b> |

|          |          |          |                  |      |      |               |
|----------|----------|----------|------------------|------|------|---------------|
| NCF2     | 1,617483 | 1,449289 | <b>1,533386</b>  | 1753 | 2520 | <b>2136,5</b> |
| TMEM63B  | 1,533407 | NaN      | <b>1,533407</b>  | 1649 | NaN  | <b>1649</b>   |
| AGAP1    | 1,53366  | NaN      | <b>1,53366</b>   | 1069 | NaN  | <b>1069</b>   |
| C9orf41  | 1,533932 | NaN      | <b>1,533932</b>  | 1609 | NaN  | <b>1609</b>   |
| TMEM106C | 0,614529 | 2,45382  | <b>1,5341745</b> | 1831 | 2091 | <b>1961</b>   |
| SCCPDH   | 1,490874 | 1,578673 | <b>1,5347735</b> | 1612 | 2100 | <b>1856</b>   |
| MYL10    | 1,249524 | 1,82021  | <b>1,534867</b>  | 1732 | 1681 | <b>1706,5</b> |
| DAPK1    | 2,045004 | 1,025962 | <b>1,535483</b>  | 2222 | 2628 | <b>2425</b>   |
| FGFBP1   | 1,535956 | NaN      | <b>1,535956</b>  | 1423 | NaN  | <b>1423</b>   |
| MICALCL  | 1,621935 | 1,450638 | <b>1,5362865</b> | 538  | 1360 | <b>949</b>    |
| PSD      | 1,923526 | 1,154455 | <b>1,5389905</b> | 1944 | 2116 | <b>2030</b>   |
| METTL1   | 1,61426  | 1,465463 | <b>1,5398615</b> | 1218 | 1552 | <b>1385</b>   |
| VHLL     | 1,540326 | NaN      | <b>1,540326</b>  | 2114 | NaN  | <b>2114</b>   |
| GPS1     | 1,540713 | NaN      | <b>1,540713</b>  | 1140 | NaN  | <b>1140</b>   |
| ZFR      | 1,540767 | NaN      | <b>1,540767</b>  | 1751 | NaN  | <b>1751</b>   |
| SOX21    | 1,495444 | 1,588442 | <b>1,541943</b>  | 1410 | 1821 | <b>1615,5</b> |
| OR4K14   | 2,400302 | 0,684099 | <b>1,5422005</b> | 1794 | 2085 | <b>1939,5</b> |
| FAM18A   | 2,129    | 0,955673 | <b>1,5423365</b> | 1622 | 2360 | <b>1991</b>   |
| PHOSPHO2 | 1,606889 | 1,478031 | <b>1,54246</b>   | 1401 | 2086 | <b>1743,5</b> |
| CCL8     | 1,364158 | 1,72316  | <b>1,543659</b>  | 1476 | 2881 | <b>2178,5</b> |
| MCM5     | 2,153307 | 0,934433 | <b>1,54387</b>   | 1448 | 2181 | <b>1814,5</b> |
| LAYN     | 1,543953 | NaN      | <b>1,543953</b>  | 2126 | NaN  | <b>2126</b>   |
| RABGAP1L | 1,473235 | 1,615564 | <b>1,5443995</b> | 2043 | 3036 | <b>2539,5</b> |
| TRPM1    | 1,297468 | 1,792927 | <b>1,5451975</b> | 1803 | 2334 | <b>2068,5</b> |
| CALHM3   | 1,545993 | NaN      | <b>1,545993</b>  | 1440 | NaN  | <b>1440</b>   |
| CRYM     | 1,178686 | 1,913492 | <b>1,546089</b>  | 1245 | 2061 | <b>1653</b>   |
| FRS3     | 1,277968 | 1,814589 | <b>1,5462785</b> | 1833 | 2776 | <b>2304,5</b> |
| LYZL6    | 1,05571  | 2,037723 | <b>1,5467165</b> | 637  | 1120 | <b>878,5</b>  |
| TRIM11   | 1,664709 | 1,429728 | <b>1,5472185</b> | 1414 | 1904 | <b>1659</b>   |
| AURKB    | 1,601714 | 1,495386 | <b>1,54855</b>   | 809  | 1518 | <b>1163,5</b> |
| INPPL1   | 0,08024  | 3,017478 | <b>1,548859</b>  | 1369 | 2510 | <b>1939,5</b> |
| ZFYVE21  | 1,01619  | 2,081628 | <b>1,548909</b>  | 1477 | 1400 | <b>1438,5</b> |
| INO80D   | 1,639325 | 1,460192 | <b>1,5497585</b> | 2073 | 2236 | <b>2154,5</b> |
| C12orf29 | 1,617003 | 1,482645 | <b>1,549824</b>  | 936  | 1247 | <b>1091,5</b> |

|          |          |          |                  |      |      |               |
|----------|----------|----------|------------------|------|------|---------------|
| CLCN6    | 2,867703 | 0,2333   | <b>1,5505015</b> | 1716 | 2137 | <b>1926,5</b> |
| SEC23A   | 1,551264 | NaN      | <b>1,551264</b>  | 1727 | NaN  | <b>1727</b>   |
| CEP250   | 1,551379 | NaN      | <b>1,551379</b>  | 768  | NaN  | <b>768</b>    |
| GPR172B  | 2,515853 | 0,590215 | <b>1,553034</b>  | 1544 | 1676 | <b>1610</b>   |
| SIVA1    | 1,336823 | 1,770225 | <b>1,553524</b>  | 1284 | 1806 | <b>1545</b>   |
| RFX5     | 1,448814 | 1,658941 | <b>1,5538775</b> | 1109 | 1357 | <b>1233</b>   |
| EIF3G    | 0,284578 | 2,823405 | <b>1,5539915</b> | 1305 | 1250 | <b>1277,5</b> |
| SKA2     | 1,804982 | 1,304194 | <b>1,554588</b>  | 858  | 1551 | <b>1204,5</b> |
| ACAT1    | 1,615266 | 1,494495 | <b>1,5548805</b> | 1272 | 2259 | <b>1765,5</b> |
| SRGAP2   | 1,310718 | 1,7994   | <b>1,555059</b>  | 1667 | 1773 | <b>1720</b>   |
| LATS2    | 1,563297 | 1,549405 | <b>1,556351</b>  | 1387 | 1649 | <b>1518</b>   |
| NOM1     | 1,55817  | NaN      | <b>1,55817</b>   | 1505 | NaN  | <b>1505</b>   |
| IFNB1    | 1,29019  | 1,826672 | <b>1,558431</b>  | 1626 | 2152 | <b>1889</b>   |
| MFAP1    | 0,818134 | 2,304163 | <b>1,5611485</b> | 930  | 1142 | <b>1036</b>   |
| ZNF266   | 1,424707 | 1,697755 | <b>1,561231</b>  | 2157 | 1978 | <b>2067,5</b> |
| DNAL1    | 1,562759 | NaN      | <b>1,562759</b>  | 1854 | NaN  | <b>1854</b>   |
| C1orf122 | 1,56393  | NaN      | <b>1,56393</b>   | 1707 | NaN  | <b>1707</b>   |
| YDJC     | 1,587059 | 1,543208 | <b>1,5651335</b> | 1545 | 2507 | <b>2026</b>   |
| NMNAT3   | 1,931924 | 1,198727 | <b>1,5653255</b> | 906  | 1341 | <b>1123,5</b> |
| POLL     | 0,250227 | 2,880894 | <b>1,5655605</b> | 1126 | 1859 | <b>1492,5</b> |
| PDP2     | 1,836072 | 1,295438 | <b>1,565755</b>  | 2375 | 2585 | <b>2480</b>   |
| TMIGD2   | 1,673534 | 1,458244 | <b>1,565889</b>  | 1557 | 2478 | <b>2017,5</b> |
| ALB      | 1,538229 | 1,595374 | <b>1,5668015</b> | 1116 | 2072 | <b>1594</b>   |
| ITLN2    | 1,288152 | 1,848258 | <b>1,568205</b>  | 1826 | 1878 | <b>1852</b>   |
| CNR1     | 1,569358 | NaN      | <b>1,569358</b>  | 2118 | NaN  | <b>2118</b>   |
| NKAP     | 2,435073 | 0,705836 | <b>1,5704545</b> | 1086 | 1221 | <b>1153,5</b> |
| MEX3B    | 1,68139  | 1,459608 | <b>1,570499</b>  | 2153 | 2708 | <b>2430,5</b> |
| PFKFB1   | 1,346922 | 1,798044 | <b>1,572483</b>  | 1466 | 1777 | <b>1621,5</b> |
| ELK4     | NaN      | 1,572611 | <b>1,572611</b>  | NaN  | 2458 | <b>2458</b>   |
| PPM1B    | 1,545575 | 1,607614 | <b>1,5765945</b> | 1391 | 2371 | <b>1881</b>   |
| ANAPC11  | 1,225529 | 1,928414 | <b>1,5769715</b> | 1077 | 1643 | <b>1360</b>   |
| PRTG     | 1,577728 | NaN      | <b>1,577728</b>  | 1756 | NaN  | <b>1756</b>   |
| PRPF31   | 0,895961 | 2,262178 | <b>1,5790695</b> | 1234 | 1329 | <b>1281,5</b> |
| MYOG     | 0,724889 | 2,433303 | <b>1,579096</b>  | 878  | 1119 | <b>998,5</b>  |

|          |          |          |                  |      |      |               |
|----------|----------|----------|------------------|------|------|---------------|
| HRK      | 1,410072 | 1,748737 | <b>1,5794045</b> | 1662 | 1869 | <b>1765,5</b> |
| EXOSC4   | 1,047806 | 2,119315 | <b>1,5835605</b> | 1868 | 2908 | <b>2388</b>   |
| MADCAM1  | 2,73511  | 0,433287 | <b>1,5841985</b> | 1439 | 2101 | <b>1770</b>   |
| SCNN1B   | 1,383313 | 1,790398 | <b>1,5868555</b> | 1583 | 2032 | <b>1807,5</b> |
| PARP16   | 1,587815 | NaN      | <b>1,587815</b>  | 1683 | NaN  | <b>1683</b>   |
| PCDHB1   | 1,456368 | 1,720255 | <b>1,5883115</b> | 1630 | 2069 | <b>1849,5</b> |
| FAM20C   | 1,968649 | 1,208812 | <b>1,5887305</b> | 1381 | 1973 | <b>1677</b>   |
| AMZ2     | 0,866513 | 2,312948 | <b>1,5897305</b> | 1895 | 2676 | <b>2285,5</b> |
| ARHGAP35 | 2,060427 | 1,120537 | <b>1,590482</b>  | 1746 | 2572 | <b>2159</b>   |
| SNRPG    | 1,590618 | NaN      | <b>1,590618</b>  | 1214 | NaN  | <b>1214</b>   |
| C15orf26 | 1,703162 | 1,478581 | <b>1,5908715</b> | 2018 | 2461 | <b>2239,5</b> |
| POLI     | 1,688541 | 1,493419 | <b>1,59098</b>   | 1163 | 1948 | <b>1555,5</b> |
| KLF13    | NaN      | 1,590981 | <b>1,590981</b>  | NaN  | 2521 | <b>2521</b>   |
| LY6E     | 1,59196  | NaN      | <b>1,59196</b>   | 1520 | NaN  | <b>1520</b>   |
| CLDND2   | 1,651641 | 1,532323 | <b>1,591982</b>  | 1796 | 2124 | <b>1960</b>   |
| DEFB132  | 1,708004 | 1,478417 | <b>1,5932105</b> | 1519 | 1886 | <b>1702,5</b> |
| WBSCR17  | 1,701358 | 1,486877 | <b>1,5941175</b> | 1439 | 2042 | <b>1740,5</b> |
| ROR1     | 1,723697 | 1,467468 | <b>1,5955825</b> | 1753 | 1786 | <b>1769,5</b> |
| ABCC4    | 1,663469 | 1,529376 | <b>1,5964225</b> | 1808 | 2456 | <b>2132</b>   |
| TEX2     | 1,596908 | NaN      | <b>1,596908</b>  | 1643 | NaN  | <b>1643</b>   |
| TIGD5    | 1,597235 | NaN      | <b>1,597235</b>  | 1843 | NaN  | <b>1843</b>   |
| BLM      | 1,388922 | 1,805556 | <b>1,597239</b>  | 1463 | 2112 | <b>1787,5</b> |
| PTH1R    | 1,597419 | NaN      | <b>1,597419</b>  | 1858 | NaN  | <b>1858</b>   |
| ZNF323   | 2,086818 | 1,111797 | <b>1,5993075</b> | 1751 | 1619 | <b>1685</b>   |
| TRH      | 1,300664 | 1,898005 | <b>1,5993345</b> | 1316 | 1535 | <b>1425,5</b> |
| ACP5     | 1,167026 | 2,032    | <b>1,599513</b>  | 1534 | 2081 | <b>1807,5</b> |
| MTG1     | 2,536447 | 0,663327 | <b>1,599887</b>  | 1544 | 1712 | <b>1628</b>   |
| WDR18    | 2,430465 | 0,769357 | <b>1,599911</b>  | 1393 | 1452 | <b>1422,5</b> |
| MLXIPL   | 1,224797 | 1,975115 | <b>1,599956</b>  | 1608 | 2084 | <b>1846</b>   |
| STK4     | 1,643053 | 1,556895 | <b>1,599974</b>  | 1420 | 2316 | <b>1868</b>   |
| OR4C46   | 1,600072 | NaN      | <b>1,600072</b>  | 1082 | NaN  | <b>1082</b>   |
| SRSF5    | 0,612859 | 2,587313 | <b>1,600086</b>  | 1764 | 2025 | <b>1894,5</b> |
| GON4L    | 0,87427  | 2,326378 | <b>1,600324</b>  | 539  | 563  | <b>551</b>    |
| MYLPF    | 1,600768 | NaN      | <b>1,600768</b>  | 1432 | NaN  | <b>1432</b>   |

|           |          |          |                  |      |      |               |
|-----------|----------|----------|------------------|------|------|---------------|
| TLN1      | 0,015122 | 3,190829 | <b>1,6029755</b> | 1110 | 1483 | <b>1296,5</b> |
| BMX       | 1,395791 | 1,810497 | <b>1,603144</b>  | 1582 | 1920 | <b>1751</b>   |
| PLAUR     | 0,694952 | 2,51179  | <b>1,603371</b>  | 1738 | 2077 | <b>1907,5</b> |
| SC5DL     | 2,166183 | 1,043074 | <b>1,6046285</b> | 1595 | 1930 | <b>1762,5</b> |
| AMPD1     | 1,264929 | 1,94584  | <b>1,6053845</b> | 2153 | 2671 | <b>2412</b>   |
| ERMP1     | 0,652215 | 2,558713 | <b>1,605464</b>  | 1933 | 2320 | <b>2126,5</b> |
| KRT33B    | 2,403192 | 0,808823 | <b>1,6060075</b> | 1697 | 2271 | <b>1984</b>   |
| CEACAM7   | 1,607508 | NaN      | <b>1,607508</b>  | 906  | NaN  | <b>906</b>    |
| RCOR1     | 2,541011 | 0,675164 | <b>1,6080875</b> | 1800 | 2199 | <b>1999,5</b> |
| PSMD3     | 1,608599 | NaN      | <b>1,608599</b>  | 801  | NaN  | <b>801</b>    |
| SYNGR1    | 1,834856 | 1,385954 | <b>1,610405</b>  | 1798 | 1378 | <b>1588</b>   |
| HSPB9     | 0,612345 | 2,609919 | <b>1,611132</b>  | 1308 | 1582 | <b>1445</b>   |
| OR5R1     | 1,644102 | 1,581016 | <b>1,612559</b>  | 1401 | 1473 | <b>1437</b>   |
| CPLX2     | 1,476416 | 1,750365 | <b>1,6133905</b> | 1753 | 2039 | <b>1896</b>   |
| CCL24     | 1,099718 | 2,127837 | <b>1,6137775</b> | 1763 | 1611 | <b>1687</b>   |
| CDK18     | 2,339973 | 0,887719 | <b>1,613846</b>  | 2019 | 2024 | <b>2021,5</b> |
| SULF2     | 2,485162 | 0,745598 | <b>1,61538</b>   | 1959 | 2234 | <b>2096,5</b> |
| IL31RA    | 1,003693 | 2,228632 | <b>1,6161625</b> | 1175 | 2147 | <b>1661</b>   |
| DHX8      | 1,906971 | 1,327842 | <b>1,6174065</b> | 1512 | 1089 | <b>1300,5</b> |
| RNF144A   | 1,330103 | 1,911256 | <b>1,6206795</b> | 1743 | 2522 | <b>2132,5</b> |
| KRCC1     | 1,723778 | 1,519609 | <b>1,6216935</b> | 1543 | 2299 | <b>1921</b>   |
| OVOL1     | 1,6217   | NaN      | <b>1,6217</b>    | 1570 | NaN  | <b>1570</b>   |
| GDF5      | 2,053299 | 1,190692 | <b>1,6219955</b> | 1878 | 1820 | <b>1849</b>   |
| TRIM56    | 1,931894 | 1,314565 | <b>1,6232295</b> | 1690 | 2015 | <b>1852,5</b> |
| FAM32A    | 1,663408 | 1,585905 | <b>1,6246565</b> | 1750 | 1607 | <b>1678,5</b> |
| COPS4     | 1,889964 | 1,361321 | <b>1,6256425</b> | 1588 | 2023 | <b>1805,5</b> |
| ZNF101    | 1,627813 | NaN      | <b>1,627813</b>  | 1613 | NaN  | <b>1613</b>   |
| NR2E1     | NaN      | 1,628643 | <b>1,628643</b>  | NaN  | 2742 | <b>2742</b>   |
| MRPL54    | 1,654033 | 1,604828 | <b>1,6294305</b> | 1517 | 2176 | <b>1846,5</b> |
| ACAP2     | 1,633678 | NaN      | <b>1,633678</b>  | 2117 | NaN  | <b>2117</b>   |
| LYPLA2    | 2,211842 | 1,05665  | <b>1,634246</b>  | 677  | 1077 | <b>877</b>    |
| GABRR1    | 1,12885  | 2,140289 | <b>1,6345695</b> | 1204 | 1810 | <b>1507</b>   |
| MS4A6E    | 2,245646 | 1,025351 | <b>1,6354985</b> | 1370 | 1499 | <b>1434,5</b> |
| C20orf195 | 1,635583 | NaN      | <b>1,635583</b>  | 1673 | NaN  | <b>1673</b>   |

|           |          |          |                  |      |      |               |
|-----------|----------|----------|------------------|------|------|---------------|
| ABHD10    | 0,912844 | 2,36316  | <b>1,638002</b>  | 1757 | 2161 | <b>1959</b>   |
| SLC39A4   | 1,408485 | 1,873919 | <b>1,641202</b>  | 1655 | 2547 | <b>2101</b>   |
| KLRD1     | 0,769549 | 2,51377  | <b>1,6416595</b> | 1025 | 1142 | <b>1083,5</b> |
| C9orf37   | 1,597237 | 1,687242 | <b>1,6422395</b> | 2043 | 2248 | <b>2145,5</b> |
| GMIP      | 1,8654   | 1,419783 | <b>1,6425915</b> | 1506 | 2694 | <b>2100</b>   |
| PTPRG     | 1,438993 | 1,846923 | <b>1,642958</b>  | 1576 | 1979 | <b>1777,5</b> |
| C10orf96  | 0,245442 | 3,040944 | <b>1,643193</b>  | 1540 | 2057 | <b>1798,5</b> |
| OR4N4     | 1,643741 | NaN      | <b>1,643741</b>  | 1139 | NaN  | <b>1139</b>   |
| C15orf40  | 1,402495 | 1,88618  | <b>1,6443375</b> | 2055 | 2886 | <b>2470,5</b> |
| NCF4      | 1,644522 | NaN      | <b>1,644522</b>  | 1718 | NaN  | <b>1718</b>   |
| LIX1      | 1,908572 | 1,382587 | <b>1,6455795</b> | 1487 | 2121 | <b>1804</b>   |
| LINC00207 | 1,646474 | NaN      | <b>1,646474</b>  | 833  | NaN  | <b>833</b>    |
| FAM116B   | 0,219685 | 3,075573 | <b>1,647629</b>  | 1440 | 1851 | <b>1645,5</b> |
| PRPF6     | 1,648153 | NaN      | <b>1,648153</b>  | 1981 | NaN  | <b>1981</b>   |
| C3orf14   | 1,580825 | 1,715558 | <b>1,6481915</b> | 1230 | 1851 | <b>1540,5</b> |
| RASA2     | 2,854071 | 0,450692 | <b>1,6523815</b> | 1931 | 1864 | <b>1897,5</b> |
| BBOX1     | NaN      | 1,652966 | <b>1,652966</b>  | NaN  | 1710 | <b>1710</b>   |
| CLIP1     | 1,655018 | NaN      | <b>1,655018</b>  | 1514 | NaN  | <b>1514</b>   |
| LGSN      | 1,159244 | 2,151236 | <b>1,65524</b>   | 1403 | 2053 | <b>1728</b>   |
| NOL3      | 1,655513 | NaN      | <b>1,655513</b>  | 1712 | NaN  | <b>1712</b>   |
| GPR110    | 1,655993 | NaN      | <b>1,655993</b>  | 1898 | NaN  | <b>1898</b>   |
| RNF139    | 1,027996 | 2,28617  | <b>1,657083</b>  | 1462 | 2387 | <b>1924,5</b> |
| KRT23     | 1,103168 | 2,217655 | <b>1,6604115</b> | 1721 | 2113 | <b>1917</b>   |
| CHI3L1    | 2,128888 | 1,192986 | <b>1,660937</b>  | 1004 | 1069 | <b>1036,5</b> |
| BCKDK     | 1,291257 | 2,031574 | <b>1,6614155</b> | 1837 | 1930 | <b>1883,5</b> |
| GPR17     | 1,662191 | NaN      | <b>1,662191</b>  | 1215 | NaN  | <b>1215</b>   |
| RPS4X     | 2,084311 | 1,241487 | <b>1,662899</b>  | 900  | 915  | <b>907,5</b>  |
| GPATCH8   | 1,665616 | NaN      | <b>1,665616</b>  | 1636 | NaN  | <b>1636</b>   |
| PLRG1     | 1,097027 | 2,235026 | <b>1,6660265</b> | 780  | 1205 | <b>992,5</b>  |
| RPS19     | 1,666091 | NaN      | <b>1,666091</b>  | 788  | NaN  | <b>788</b>    |
| SOHLH1    | 1,666437 | NaN      | <b>1,666437</b>  | 1594 | NaN  | <b>1594</b>   |
| ATP5D     | 1,220224 | 2,112886 | <b>1,666555</b>  | 1472 | 2025 | <b>1748,5</b> |
| CXorf58   | 1,667252 | NaN      | <b>1,667252</b>  | 1688 | NaN  | <b>1688</b>   |
| PEX26     | 1,668511 | NaN      | <b>1,668511</b>  | 1939 | NaN  | <b>1939</b>   |



|          |          |          |                  |      |      |               |
|----------|----------|----------|------------------|------|------|---------------|
| C22orf43 | 1,293552 | 2,043663 | <b>1,6686075</b> | 1195 | 2204 | <b>1699,5</b> |
| VASH1    | 1,669214 | NaN      | <b>1,669214</b>  | 1333 | NaN  | <b>1333</b>   |
| EP300    | 1,530807 | 1,80783  | <b>1,6693185</b> | 1295 | 2007 | <b>1651</b>   |
| PSMC3    | 1,033453 | 2,30779  | <b>1,6706215</b> | 1766 | 1927 | <b>1846,5</b> |
| COPS7B   | 1,566959 | 1,774909 | <b>1,670934</b>  | 2092 | 2581 | <b>2336,5</b> |
| SLC17A4  | 1,767143 | 1,575169 | <b>1,671156</b>  | 1799 | 2493 | <b>2146</b>   |
| LRP6     | 1,358541 | 1,986476 | <b>1,6725085</b> | 1975 | 2337 | <b>2156</b>   |
| MARCKSL1 | 1,672676 | NaN      | <b>1,672676</b>  | 1078 | NaN  | <b>1078</b>   |
| DAND5    | 1,673003 | NaN      | <b>1,673003</b>  | 1104 | NaN  | <b>1104</b>   |
| 14-sept  | 1,676428 | NaN      | <b>1,676428</b>  | 1430 | NaN  | <b>1430</b>   |
| FBXO34   | 1,09356  | 2,260426 | <b>1,676993</b>  | 2020 | 2816 | <b>2418</b>   |
| ACAA2    | NaN      | 1,677474 | <b>1,677474</b>  | NaN  | 3388 | <b>3388</b>   |
| ITPRIP   | 1,775996 | 1,579328 | <b>1,677662</b>  | 1947 | 1757 | <b>1852</b>   |
| SECISBP2 | 0,773149 | 2,585055 | <b>1,679102</b>  | 2258 | 2167 | <b>2212,5</b> |
| TOMM7    | 1,680305 | NaN      | <b>1,680305</b>  | 1720 | NaN  | <b>1720</b>   |
| MDH1B    | 1,403738 | 1,957469 | <b>1,6806035</b> | 1284 | 1801 | <b>1542,5</b> |
| SLC12A9  | 1,986667 | 1,375735 | <b>1,681201</b>  | 1670 | 2234 | <b>1952</b>   |
| LUC7L3   | 1,681643 | NaN      | <b>1,681643</b>  | 1709 | NaN  | <b>1709</b>   |
| NLK      | 1,870042 | 1,494626 | <b>1,682334</b>  | 2093 | 2271 | <b>2182</b>   |
| GBE1     | 2,680961 | 0,684563 | <b>1,682762</b>  | 1515 | 2126 | <b>1820,5</b> |
| TMEM158  | 1,683219 | NaN      | <b>1,683219</b>  | 1649 | NaN  | <b>1649</b>   |
| PRR15    | 1,687198 | NaN      | <b>1,687198</b>  | 1750 | NaN  | <b>1750</b>   |
| SLC10A1  | 1,788358 | 1,595105 | <b>1,6917315</b> | 1623 | 1894 | <b>1758,5</b> |
| PPP1R14C | 1,475867 | 1,91064  | <b>1,6932535</b> | 1455 | 2442 | <b>1948,5</b> |
| TSHZ1    | 1,105847 | 2,282877 | <b>1,694362</b>  | 1614 | 2467 | <b>2040,5</b> |
| SAMHD1   | 2,00835  | 1,380919 | <b>1,6946345</b> | 1618 | 2023 | <b>1820,5</b> |
| PLEKHO1  | 1,695628 | NaN      | <b>1,695628</b>  | 1857 | NaN  | <b>1857</b>   |
| CLCF1    | 1,998802 | 1,393309 | <b>1,6960555</b> | 1711 | 1726 | <b>1718,5</b> |
| VSIG2    | 1,646551 | 1,747638 | <b>1,6970945</b> | 1167 | 2053 | <b>1610</b>   |
| GUCY1A3  | 2,199754 | 1,195817 | <b>1,6977855</b> | 1831 | 2282 | <b>2056,5</b> |
| TNRC6B   | 1,660587 | 1,735284 | <b>1,6979355</b> | 1092 | 1664 | <b>1378</b>   |
| TIMM10   | 1,341471 | 2,057264 | <b>1,6993675</b> | 1458 | 2399 | <b>1928,5</b> |
| KERA     | 1,788848 | 1,61634  | <b>1,702594</b>  | 1543 | 2045 | <b>1794</b>   |
| CHCHD8   | 2,039115 | 1,366263 | <b>1,702689</b>  | 1478 | 1723 | <b>1600,5</b> |

|          |          |          |                  |      |      |               |
|----------|----------|----------|------------------|------|------|---------------|
| OR52A1   | 1,703895 | NaN      | <b>1,703895</b>  | 1721 | NaN  | <b>1721</b>   |
| SLC39A10 | 0,964847 | 2,446809 | <b>1,705828</b>  | 816  | 2021 | <b>1418,5</b> |
| RMI2     | 1,707417 | NaN      | <b>1,707417</b>  | 1368 | NaN  | <b>1368</b>   |
| MS4A10   | 1,43928  | 1,980022 | <b>1,709651</b>  | 1858 | 1822 | <b>1840</b>   |
| DSP      | 1,762472 | 1,657434 | <b>1,709953</b>  | 1553 | 2115 | <b>1834</b>   |
| DCUN1D5  | 1,709852 | 1,710295 | <b>1,7100735</b> | 1751 | 2219 | <b>1985</b>   |
| GPR37L1  | 1,710817 | NaN      | <b>1,710817</b>  | 836  | NaN  | <b>836</b>    |
| TNNI2    | NaN      | 1,711682 | <b>1,711682</b>  | NaN  | 2585 | <b>2585</b>   |
| MEX3A    | 2,474858 | 0,9494   | <b>1,712129</b>  | 1253 | 2327 | <b>1790</b>   |
| DIRAS2   | 1,249633 | 2,175254 | <b>1,7124435</b> | 2204 | 2018 | <b>2111</b>   |
| CLN8     | 1,714159 | NaN      | <b>1,714159</b>  | 1719 | NaN  | <b>1719</b>   |
| NPAT     | 2,209453 | 1,220781 | <b>1,715117</b>  | 569  | 868  | <b>718,5</b>  |
| DVL2     | 1,754963 | 1,678085 | <b>1,716524</b>  | 1322 | 1956 | <b>1639</b>   |
| ELL2     | 1,006497 | 2,429256 | <b>1,7178765</b> | 2147 | 2296 | <b>2221,5</b> |
| TNFSF8   | 1,92611  | 1,510126 | <b>1,718118</b>  | 1909 | 2309 | <b>2109</b>   |
| STAMBPL1 | 2,017231 | 1,421356 | <b>1,7192935</b> | 1465 | 2619 | <b>2042</b>   |
| HMG20B   | 0,683783 | 2,754821 | <b>1,719302</b>  | 1353 | 2241 | <b>1797</b>   |
| TERF2    | 1,71936  | NaN      | <b>1,71936</b>   | 1657 | NaN  | <b>1657</b>   |
| FAM127A  | 1,71937  | NaN      | <b>1,71937</b>   | 1034 | NaN  | <b>1034</b>   |
| MIER3    | 1,71978  | NaN      | <b>1,71978</b>   | 1699 | NaN  | <b>1699</b>   |
| BARD1    | 1,232234 | 2,208973 | <b>1,7206035</b> | 1428 | 1939 | <b>1683,5</b> |
| TOP3A    | 2,80931  | 0,632267 | <b>1,7207885</b> | 1804 | 1774 | <b>1789</b>   |
| NOTCH2   | 2,041599 | 1,402145 | <b>1,721872</b>  | 1748 | 2096 | <b>1922</b>   |
| STX8     | 2,746136 | 0,698891 | <b>1,7225135</b> | 1432 | 1277 | <b>1354,5</b> |
| KCNB2    | 2,925822 | 0,52263  | <b>1,724226</b>  | 1070 | 2426 | <b>1748</b>   |
| CHGB     | 1,725868 | NaN      | <b>1,725868</b>  | 2018 | NaN  | <b>2018</b>   |
| RNF141   | 1,654846 | 1,797093 | <b>1,7259695</b> | 1539 | 2729 | <b>2134</b>   |
| FFAR1    | 1,912107 | 1,540483 | <b>1,726295</b>  | 2295 | 1646 | <b>1970,5</b> |
| PCDHA3   | 2,692914 | 0,768787 | <b>1,7308505</b> | 2183 | 2044 | <b>2113,5</b> |
| CYP11B1  | NaN      | 1,73122  | <b>1,73122</b>   | NaN  | 2883 | <b>2883</b>   |
| TUBB1    | 1,828422 | 1,636617 | <b>1,7325195</b> | 2056 | 2247 | <b>2151,5</b> |
| C7orf62  | 1,311793 | 2,154317 | <b>1,733055</b>  | 1111 | 2004 | <b>1557,5</b> |
| C12orf35 | 1,733949 | NaN      | <b>1,733949</b>  | 1737 | NaN  | <b>1737</b>   |
| SF3A3    | 1,733988 | NaN      | <b>1,733988</b>  | 987  | NaN  | <b>987</b>    |

|           |          |          |                  |      |      |               |
|-----------|----------|----------|------------------|------|------|---------------|
| KCNJ5     | 1,26281  | 2,206839 | <b>1,7348245</b> | 1338 | 1638 | <b>1488</b>   |
| BCAS4     | 1,663824 | 1,807966 | <b>1,735895</b>  | 1754 | 1738 | <b>1746</b>   |
| ITGA2B    | 1,577824 | 1,894155 | <b>1,7359895</b> | 2348 | 2436 | <b>2392</b>   |
| CMC1      | 2,308523 | 1,166574 | <b>1,7375485</b> | 1806 | 1896 | <b>1851</b>   |
| PCDH8     | 1,533941 | 1,941535 | <b>1,737738</b>  | 2132 | 1151 | <b>1641,5</b> |
| GPR22     | 1,738183 | NaN      | <b>1,738183</b>  | 1352 | NaN  | <b>1352</b>   |
| ARFGEF1   | 1,972569 | 1,505046 | <b>1,7388075</b> | 1563 | 1799 | <b>1681</b>   |
| HEXDC     | 1,738829 | NaN      | <b>1,738829</b>  | 1726 | NaN  | <b>1726</b>   |
| IFI27     | 1,74078  | NaN      | <b>1,74078</b>   | 1645 | NaN  | <b>1645</b>   |
| CHAC2     | 1,22877  | 2,254454 | <b>1,741612</b>  | 1979 | 1981 | <b>1980</b>   |
| SMU1      | 1,822309 | 1,663312 | <b>1,7428105</b> | 1282 | 1182 | <b>1232</b>   |
| GRIA3     | 1,299506 | 2,188989 | <b>1,7442475</b> | 1292 | 1923 | <b>1607,5</b> |
| DENND5A   | 1,745985 | NaN      | <b>1,745985</b>  | 1709 | NaN  | <b>1709</b>   |
| OAT       | 1,215564 | 2,278042 | <b>1,746803</b>  | 1275 | 2126 | <b>1700,5</b> |
| CCDC112   | 2,217529 | 1,2767   | <b>1,7471145</b> | 1334 | 1574 | <b>1454</b>   |
| TESK2     | 1,344495 | 2,152267 | <b>1,748381</b>  | 2015 | 2136 | <b>2075,5</b> |
| DPY19L4   | 1,88832  | 1,611674 | <b>1,749997</b>  | 1816 | 2454 | <b>2135</b>   |
| PJA2      | 1,434924 | 2,074859 | <b>1,7548915</b> | 1459 | 2168 | <b>1813,5</b> |
| CHST6     | 1,849128 | 1,660763 | <b>1,7549455</b> | 1436 | 1683 | <b>1559,5</b> |
| IFI27L2   | 1,755694 | NaN      | <b>1,755694</b>  | 1972 | NaN  | <b>1972</b>   |
| HIST1H2AC | 1,756072 | NaN      | <b>1,756072</b>  | 1491 | NaN  | <b>1491</b>   |
| COL9A1    | 1,49566  | 2,020793 | <b>1,7582265</b> | 1239 | 1882 | <b>1560,5</b> |
| ZNF334    | 1,456468 | 2,063331 | <b>1,7598995</b> | 1263 | 1465 | <b>1364</b>   |
| WWC1      | 2,282592 | 1,237784 | <b>1,760188</b>  | 1746 | 1931 | <b>1838,5</b> |
| PHC1      | 2,631339 | 0,890337 | <b>1,760838</b>  | 1563 | 1724 | <b>1643,5</b> |
| KRTAP26-1 | 1,764424 | NaN      | <b>1,764424</b>  | 1882 | NaN  | <b>1882</b>   |
| C3orf74   | 1,481741 | 2,04756  | <b>1,7646505</b> | 1699 | 1936 | <b>1817,5</b> |
| HHEX      | 1,672598 | 1,856741 | <b>1,7646695</b> | 1727 | 1685 | <b>1706</b>   |
| ZFYVE28   | 1,766662 | NaN      | <b>1,766662</b>  | 1406 | NaN  | <b>1406</b>   |
| GREM1     | 2,336515 | 1,196849 | <b>1,766682</b>  | 2095 | 2164 | <b>2129,5</b> |
| L1CAM     | 0,939474 | 2,595233 | <b>1,7673535</b> | 1338 | 1894 | <b>1616</b>   |
| C12orf69  | 1,307612 | 2,227504 | <b>1,767558</b>  | 2290 | 2759 | <b>2524,5</b> |
| GATC      | 1,539608 | 1,995547 | <b>1,7675775</b> | 1500 | 1867 | <b>1683,5</b> |
| OR511     | 1,818626 | 1,717053 | <b>1,7678395</b> | 1376 | 1917 | <b>1646,5</b> |

|           |          |          |                  |      |      |               |
|-----------|----------|----------|------------------|------|------|---------------|
| MYLK      | 1,536654 | 2,002061 | <b>1,7693575</b> | 1185 | 1850 | <b>1517,5</b> |
| EPRS      | 1,751858 | 1,789607 | <b>1,7707325</b> | 928  | 1218 | <b>1073</b>   |
| ADC       | 0,988083 | 2,555188 | <b>1,7716355</b> | 1626 | 2488 | <b>2057</b>   |
| TMCC2     | 1,772541 | NaN      | <b>1,772541</b>  | 1694 | NaN  | <b>1694</b>   |
| UBN1      | 0,983539 | 2,56247  | <b>1,7730045</b> | 1430 | 2444 | <b>1937</b>   |
| KIF23     | 2,136373 | 1,413857 | <b>1,775115</b>  | 1578 | 2328 | <b>1953</b>   |
| CYP4F12   | NaN      | 1,775204 | <b>1,775204</b>  | NaN  | 2651 | <b>2651</b>   |
| NPY1R     | 1,775525 | NaN      | <b>1,775525</b>  | 1620 | NaN  | <b>1620</b>   |
| WSB1      | 1,254021 | 2,299693 | <b>1,776857</b>  | 1593 | 2844 | <b>2218,5</b> |
| ZNF827    | 1,707829 | 1,851693 | <b>1,779761</b>  | 1042 | 2172 | <b>1607</b>   |
| SIN3A     | 2,658665 | 0,903904 | <b>1,7812845</b> | 1569 | 1670 | <b>1619,5</b> |
| FAM127B   | 2,200568 | 1,362337 | <b>1,7814525</b> | 1587 | 2308 | <b>1947,5</b> |
| CDKN2D    | 1,478124 | 2,084954 | <b>1,781539</b>  | 1833 | 2279 | <b>2056</b>   |
| PPP4R2    | 1,073471 | 2,490599 | <b>1,782035</b>  | 1695 | 2189 | <b>1942</b>   |
| SYF2      | 1,531721 | 2,034456 | <b>1,7830885</b> | 1645 | 2402 | <b>2023,5</b> |
| GJA4      | 2,059346 | 1,507087 | <b>1,7832165</b> | 895  | 1578 | <b>1236,5</b> |
| SPATA12   | 1,785647 | NaN      | <b>1,785647</b>  | 1504 | NaN  | <b>1504</b>   |
| CBFB      | 1,657058 | 1,916356 | <b>1,786707</b>  | 1896 | 2916 | <b>2406</b>   |
| CD97      | 1,791471 | NaN      | <b>1,791471</b>  | 1531 | NaN  | <b>1531</b>   |
| C15orf60  | 1,825398 | 1,763366 | <b>1,794382</b>  | 619  | 1744 | <b>1181,5</b> |
| TIE1      | 2,280876 | 1,310042 | <b>1,795459</b>  | 1339 | 2139 | <b>1739</b>   |
| ARMCX5    | 2,569607 | 1,022098 | <b>1,7958525</b> | 1506 | 2152 | <b>1829</b>   |
| SELRC1    | 1,797635 | NaN      | <b>1,797635</b>  | 1702 | NaN  | <b>1702</b>   |
| GPR68     | 1,798975 | NaN      | <b>1,798975</b>  | 1598 | NaN  | <b>1598</b>   |
| KRTAP4-11 | 1,933412 | 1,664986 | <b>1,799199</b>  | 1708 | 2947 | <b>2327,5</b> |
| GPR180    | 1,800181 | NaN      | <b>1,800181</b>  | 1991 | NaN  | <b>1991</b>   |
| FBXO8     | 1,268714 | 2,332367 | <b>1,8005405</b> | 1841 | 2871 | <b>2356</b>   |
| SPATA4    | 1,801026 | NaN      | <b>1,801026</b>  | 2101 | NaN  | <b>2101</b>   |
| LOC120824 | 2,310891 | 1,298668 | <b>1,8047795</b> | 1543 | 2522 | <b>2032,5</b> |
| GMNN      | 2,685599 | 0,927875 | <b>1,806737</b>  | 984  | 1362 | <b>1173</b>   |
| KRT75     | 1,436259 | 2,177672 | <b>1,8069655</b> | 1527 | 2945 | <b>2236</b>   |
| RIC8A     | 1,808537 | NaN      | <b>1,808537</b>  | 1374 | NaN  | <b>1374</b>   |
| SNRNP40   | 1,615984 | 2,003916 | <b>1,80995</b>   | 1499 | 2334 | <b>1916,5</b> |
| PABPC4L   | 0,695918 | 2,927518 | <b>1,811718</b>  | 1693 | 1693 | <b>1693</b>   |

|          |           |          |                  |      |      |               |
|----------|-----------|----------|------------------|------|------|---------------|
| LAX1     | 2,065063  | 1,558527 | <b>1,811795</b>  | 1736 | 1960 | <b>1848</b>   |
| C19orf57 | 1,812381  | NaN      | <b>1,812381</b>  | 1396 | NaN  | <b>1396</b>   |
| FAM127C  | 1,81284   | NaN      | <b>1,81284</b>   | 1501 | NaN  | <b>1501</b>   |
| PIK3CG   | 0,942805  | 2,685387 | <b>1,814096</b>  | 2021 | 2026 | <b>2023,5</b> |
| SPINK13  | 1,815103  | NaN      | <b>1,815103</b>  | 1893 | NaN  | <b>1893</b>   |
| IMP5     | 2,129088  | 1,501271 | <b>1,8151795</b> | 1299 | 2041 | <b>1670</b>   |
| SNCB     | 1,816464  | NaN      | <b>1,816464</b>  | 1505 | NaN  | <b>1505</b>   |
| UBOX5    | 1,97796   | 1,657991 | <b>1,8179755</b> | 1593 | 2413 | <b>2003</b>   |
| FMO3     | 1,607219  | 2,028992 | <b>1,8181055</b> | 1703 | 2387 | <b>2045</b>   |
| ZBTB20   | 1,819439  | NaN      | <b>1,819439</b>  | 1466 | NaN  | <b>1466</b>   |
| HTR3B    | 1,821157  | NaN      | <b>1,821157</b>  | 1198 | NaN  | <b>1198</b>   |
| COL1A1   | 1,374852  | 2,268471 | <b>1,8216615</b> | 1641 | 1839 | <b>1740</b>   |
| PRIM2    | 2,080083  | 1,563652 | <b>1,8218675</b> | 1627 | 1851 | <b>1739</b>   |
| TTC32    | 1,822902  | NaN      | <b>1,822902</b>  | 1711 | NaN  | <b>1711</b>   |
| FBL      | 1,711354  | 1,936211 | <b>1,8237825</b> | 1420 | 1129 | <b>1274,5</b> |
| WNT2     | -0,493826 | 4,14217  | <b>1,824172</b>  | 1882 | 1996 | <b>1939</b>   |
| CDC37    | 0,328323  | 3,320789 | <b>1,824556</b>  | 1504 | 1700 | <b>1602</b>   |
| GIF      | 1,088812  | 2,563625 | <b>1,8262185</b> | 1571 | 2265 | <b>1918</b>   |
| SLC1A5   | 1,874808  | 1,77859  | <b>1,826699</b>  | 1377 | 2135 | <b>1756</b>   |
| TNNI1    | 2,514574  | 1,138875 | <b>1,8267245</b> | 2147 | 1961 | <b>2054</b>   |
| TAS2R14  | 2,352205  | 1,303001 | <b>1,827603</b>  | 1731 | 2298 | <b>2014,5</b> |
| TRUB1    | 1,912033  | 1,743588 | <b>1,8278105</b> | 2068 | 2299 | <b>2183,5</b> |
| ITCH     | 1,331788  | 2,326068 | <b>1,828928</b>  | 1730 | 2528 | <b>2129</b>   |
| DDHD1    | 1,318523  | 2,342327 | <b>1,830425</b>  | 2032 | 1811 | <b>1921,5</b> |
| TNRC18   | 1,343892  | 2,319564 | <b>1,831728</b>  | 1637 | 1980 | <b>1808,5</b> |
| MEGF6    | 1,086631  | 2,578216 | <b>1,8324235</b> | 1534 | 1944 | <b>1739</b>   |
| MLH3     | 2,336836  | 1,329308 | <b>1,833072</b>  | 1656 | 2681 | <b>2168,5</b> |
| VWCE     | 1,833203  | NaN      | <b>1,833203</b>  | 1455 | NaN  | <b>1455</b>   |
| CER1     | 1,770312  | 1,896439 | <b>1,8333755</b> | 1736 | 2535 | <b>2135,5</b> |
| TRMT61B  | 1,350993  | 2,320837 | <b>1,835915</b>  | 1829 | 1830 | <b>1829,5</b> |
| CLK3     | 2,69083   | 0,984153 | <b>1,8374915</b> | 2142 | 2379 | <b>2260,5</b> |
| ARHGAP26 | 1,756059  | 1,922407 | <b>1,839233</b>  | 1701 | 2046 | <b>1873,5</b> |
| CD33     | 1,346506  | 2,335732 | <b>1,841119</b>  | 1788 | 2024 | <b>1906</b>   |
| CDO1     | 1,873587  | 1,816969 | <b>1,845278</b>  | 1352 | 2038 | <b>1695</b>   |

|          |          |          |                  |      |      |               |
|----------|----------|----------|------------------|------|------|---------------|
| CELF2    | 1,407823 | 2,28312  | <b>1,8454715</b> | 2030 | 2097 | <b>2063,5</b> |
| GPBP1L1  | 0,582812 | 3,108645 | <b>1,8457285</b> | 1631 | 2233 | <b>1932</b>   |
| RAB19    | 2,349895 | 1,341723 | <b>1,845809</b>  | 1936 | 1831 | <b>1883,5</b> |
| C10orf54 | 2,016511 | 1,675322 | <b>1,8459165</b> | 1699 | 1973 | <b>1836</b>   |
| CNTN1    | NaN      | 1,85061  | <b>1,85061</b>   | NaN  | 2261 | <b>2261</b>   |
| OR9A2    | 1,784469 | 1,925918 | <b>1,8551935</b> | 1235 | 1400 | <b>1317,5</b> |
| STATH    | 1,328991 | 2,381698 | <b>1,8553445</b> | 2122 | 2016 | <b>2069</b>   |
| LRP3     | 1,160974 | 2,550072 | <b>1,855523</b>  | 1132 | 2059 | <b>1595,5</b> |
| DOCK1    | 0,336548 | 3,376943 | <b>1,8567455</b> | 2197 | 2342 | <b>2269,5</b> |
| IL4I1    | 3,235717 | 0,482769 | <b>1,859243</b>  | 1573 | 1616 | <b>1594,5</b> |
| RCOR3    | 2,183772 | 1,538592 | <b>1,861182</b>  | 1896 | 2114 | <b>2005</b>   |
| NFYB     | 0,956038 | 2,773506 | <b>1,864772</b>  | 1701 | 2706 | <b>2203,5</b> |
| ADAMTS17 | 1,513786 | 2,219773 | <b>1,8667795</b> | 1407 | 1921 | <b>1664</b>   |
| GIN52    | 1,867589 | NaN      | <b>1,867589</b>  | 1970 | NaN  | <b>1970</b>   |
| ARPC1A   | 1,869136 | NaN      | <b>1,869136</b>  | 1109 | NaN  | <b>1109</b>   |
| PRKCDBP  | 1,872141 | NaN      | <b>1,872141</b>  | 1402 | NaN  | <b>1402</b>   |
| KLHDC7B  | 2,456286 | 1,29043  | <b>1,873358</b>  | 1450 | 1376 | <b>1413</b>   |
| FTSJ3    | 1,627877 | 2,121157 | <b>1,874517</b>  | 1113 | 1232 | <b>1172,5</b> |
| C10orf25 | 1,87664  | NaN      | <b>1,87664</b>   | 1460 | NaN  | <b>1460</b>   |
| JUN      | 1,847569 | 1,916193 | <b>1,881881</b>  | 1779 | 1966 | <b>1872,5</b> |
| C19orf2  | 0,019802 | 3,749026 | <b>1,884414</b>  | 1711 | 2324 | <b>2017,5</b> |
| ARRB2    | 1,415513 | 2,353498 | <b>1,8845055</b> | 2052 | 2223 | <b>2137,5</b> |
| TEAD1    | 3,416964 | 0,35348  | <b>1,885222</b>  | 1290 | 1535 | <b>1412,5</b> |
| FCN2     | 2,594592 | 1,17911  | <b>1,886851</b>  | 2048 | 1796 | <b>1922</b>   |
| BBS12    | 1,672125 | 2,103748 | <b>1,8879365</b> | 1656 | 2501 | <b>2078,5</b> |
| TLN2     | 1,615994 | 2,164728 | <b>1,890361</b>  | 1845 | 2039 | <b>1942</b>   |
| PHKG2    | 1,782844 | 2,002933 | <b>1,8928885</b> | 1481 | 2127 | <b>1804</b>   |
| PDCD7    | 1,568385 | 2,217693 | <b>1,893039</b>  | 1713 | 1912 | <b>1812,5</b> |
| CACNA2D1 | 1,056626 | 2,73222  | <b>1,894423</b>  | 1690 | 2519 | <b>2104,5</b> |
| DHX9     | 1,63984  | 2,149196 | <b>1,894518</b>  | 1590 | 2016 | <b>1803</b>   |
| ELP2     | 1,627352 | 2,163653 | <b>1,8955025</b> | 1409 | 2007 | <b>1708</b>   |
| ZMAT5    | 1,896378 | NaN      | <b>1,896378</b>  | 1351 | NaN  | <b>1351</b>   |
| OR7D4    | 1,896622 | NaN      | <b>1,896622</b>  | 1653 | NaN  | <b>1653</b>   |
| PIGP     | 1,900791 | NaN      | <b>1,900791</b>  | 2113 | NaN  | <b>2113</b>   |

|          |          |          |                  |      |      |               |
|----------|----------|----------|------------------|------|------|---------------|
| SMAP2    | 1,901154 | NaN      | <b>1,901154</b>  | 1326 | NaN  | <b>1326</b>   |
| ARNTL    | 1,746211 | 2,057023 | <b>1,901617</b>  | 1746 | 2039 | <b>1892,5</b> |
| C1orf52  | 1,903125 | NaN      | <b>1,903125</b>  | 1807 | NaN  | <b>1807</b>   |
| LRRC4    | 1,321438 | 2,486477 | <b>1,9039575</b> | 1604 | 1825 | <b>1714,5</b> |
| NFIX     | 0,688842 | 3,121574 | <b>1,905208</b>  | 2022 | 2043 | <b>2032,5</b> |
| DEFB108B | 2,403346 | 1,410149 | <b>1,9067475</b> | 1873 | 1956 | <b>1914,5</b> |
| SHROOM3  | 2,173071 | 1,645407 | <b>1,909239</b>  | 1921 | 2759 | <b>2340</b>   |
| FAM131A  | 1,067308 | 2,752069 | <b>1,9096885</b> | 1485 | 1927 | <b>1706</b>   |
| GTF2A1   | 2,886065 | 0,939947 | <b>1,913006</b>  | 1649 | 1702 | <b>1675,5</b> |
| RAPGEF1  | 1,745138 | 2,081744 | <b>1,913441</b>  | 1456 | 1354 | <b>1405</b>   |
| MMP3     | 1,848441 | 1,980687 | <b>1,914564</b>  | 2090 | 2478 | <b>2284</b>   |
| RHBDL2   | 1,479641 | 2,351488 | <b>1,9155645</b> | 1064 | 1765 | <b>1414,5</b> |
| PHF12    | 1,525611 | 2,30622  | <b>1,9159155</b> | 743  | 908  | <b>825,5</b>  |
| OPN5     | 1,918055 | NaN      | <b>1,918055</b>  | 1740 | NaN  | <b>1740</b>   |
| XPR1     | 2,415966 | 1,421775 | <b>1,9188705</b> | 1192 | 1797 | <b>1494,5</b> |
| RBM42    | 1,919324 | NaN      | <b>1,919324</b>  | 1453 | NaN  | <b>1453</b>   |
| PRMT3    | 1,862177 | 1,977513 | <b>1,919845</b>  | 1773 | 2075 | <b>1924</b>   |
| SNCA     | 2,136468 | 1,706039 | <b>1,9212535</b> | 1115 | 1434 | <b>1274,5</b> |
| NDUFS6   | 2,257084 | 1,592754 | <b>1,924919</b>  | 1919 | 1747 | <b>1833</b>   |
| OR8H1    | 1,767713 | 2,085685 | <b>1,926699</b>  | 1682 | 2048 | <b>1865</b>   |
| PYCR1    | 1,29599  | 2,557681 | <b>1,9268355</b> | 1788 | 2039 | <b>1913,5</b> |
| FAM189A2 | 1,679297 | 2,180238 | <b>1,9297675</b> | 1355 | 1150 | <b>1252,5</b> |
| BRAT1    | 1,929769 | NaN      | <b>1,929769</b>  | 1930 | NaN  | <b>1930</b>   |
| MGEA5    | 1,743015 | 2,1171   | <b>1,9300575</b> | 1241 | 2125 | <b>1683</b>   |
| ZNF714   | 1,644529 | 2,220074 | <b>1,9323015</b> | 1723 | 1925 | <b>1824</b>   |
| PSRC1    | 2,051123 | 1,818694 | <b>1,9349085</b> | 1867 | 2262 | <b>2064,5</b> |
| ATP9B    | 1,904138 | 1,96598  | <b>1,935059</b>  | 1792 | 1923 | <b>1857,5</b> |
| FAM161B  | 1,322236 | 2,551046 | <b>1,936641</b>  | 1666 | 2087 | <b>1876,5</b> |
| ZBED2    | 0,404572 | 3,47666  | <b>1,940616</b>  | 1854 | 2777 | <b>2315,5</b> |
| CRTC2    | 2,132184 | 1,751385 | <b>1,9417845</b> | 1957 | 2289 | <b>2123</b>   |
| RBM25    | 1,723311 | 2,161693 | <b>1,942502</b>  | 1652 | 1609 | <b>1630,5</b> |
| WNT7A    | 1,791099 | 2,094869 | <b>1,942984</b>  | 1463 | 2139 | <b>1801</b>   |
| SERPINB1 | 0,86267  | 3,035113 | <b>1,9488915</b> | 1256 | 1422 | <b>1339</b>   |
| C7orf64  | 1,399728 | 2,504272 | <b>1,952</b>     | 1343 | 2173 | <b>1758</b>   |

|           |          |          |                  |      |      |               |
|-----------|----------|----------|------------------|------|------|---------------|
| SMC2      | 1,657009 | 2,24895  | <b>1,9529795</b> | 1839 | 1882 | <b>1860,5</b> |
| SRRM2     | 1,953153 | NaN      | <b>1,953153</b>  | 1374 | NaN  | <b>1374</b>   |
| KLF9      | 1,342287 | 2,570538 | <b>1,9564125</b> | 1245 | 2252 | <b>1748,5</b> |
| FSTL1     | 2,197103 | 1,718479 | <b>1,957791</b>  | 2477 | 2352 | <b>2414,5</b> |
| TATDN2    | 2,239213 | 1,680232 | <b>1,9597225</b> | 1912 | 2470 | <b>2191</b>   |
| DDX21     | 2,271824 | 1,648642 | <b>1,960233</b>  | 1435 | 1684 | <b>1559,5</b> |
| MRPL1     | 1,182075 | 2,739123 | <b>1,960599</b>  | 2219 | 1931 | <b>2075</b>   |
| ARHGEF4   | 1,961049 | NaN      | <b>1,961049</b>  | 1079 | NaN  | <b>1079</b>   |
| TNRC6A    | 1,616154 | 2,307831 | <b>1,9619925</b> | 1431 | 2593 | <b>2012</b>   |
| ATP5G2    | 1,492153 | 2,433065 | <b>1,962609</b>  | 1333 | 1964 | <b>1648,5</b> |
| P2RY2     | 1,964866 | NaN      | <b>1,964866</b>  | 1715 | NaN  | <b>1715</b>   |
| ACTR10    | 1,693507 | 2,248598 | <b>1,9710525</b> | 1203 | 1455 | <b>1329</b>   |
| OR2B3     | 0,738849 | 3,221017 | <b>1,979933</b>  | 1291 | 1716 | <b>1503,5</b> |
| EGR3      | 1,925038 | 2,043583 | <b>1,9843105</b> | 2115 | 2107 | <b>2111</b>   |
| CLSPN     | 1,661764 | 2,30828  | <b>1,985022</b>  | 1397 | 1339 | <b>1368</b>   |
| PSMD12    | 1,745227 | 2,2299   | <b>1,9875635</b> | 1154 | 1556 | <b>1355</b>   |
| ALMS1     | 2,330763 | 1,644433 | <b>1,987598</b>  | 1673 | 2598 | <b>2135,5</b> |
| SLC1A6    | 1,762441 | 2,214608 | <b>1,9885245</b> | 2157 | 2252 | <b>2204,5</b> |
| ZNF343    | 2,630548 | 1,350153 | <b>1,9903505</b> | 1196 | 1653 | <b>1424,5</b> |
| SRRM1     | 1,993726 | NaN      | <b>1,993726</b>  | 1523 | NaN  | <b>1523</b>   |
| GPR64     | 1,995264 | NaN      | <b>1,995264</b>  | 994  | NaN  | <b>994</b>    |
| ZNF711    | 1,998686 | NaN      | <b>1,998686</b>  | 1522 | NaN  | <b>1522</b>   |
| TMEM109   | 1,092692 | 2,910537 | <b>2,0016145</b> | 1463 | 1634 | <b>1548,5</b> |
| POLR1C    | 2,190554 | 1,819857 | <b>2,0052055</b> | 1805 | 1870 | <b>1837,5</b> |
| REV1      | 1,700258 | 2,31351  | <b>2,006884</b>  | 1750 | 1936 | <b>1843</b>   |
| N6AMT2    | 2,007527 | NaN      | <b>2,007527</b>  | 1498 | NaN  | <b>1498</b>   |
| KRTAP20-1 | 2,39247  | 1,633223 | <b>2,0128465</b> | 1885 | 2095 | <b>1990</b>   |
| DPM1      | 2,96025  | 1,066888 | <b>2,013569</b>  | 1432 | 1740 | <b>1586</b>   |
| LINC00471 | 2,014943 | NaN      | <b>2,014943</b>  | 1842 | NaN  | <b>1842</b>   |
| SLC25A39  | 2,015226 | NaN      | <b>2,015226</b>  | 1639 | NaN  | <b>1639</b>   |
| SGSH      | 1,682869 | 2,347807 | <b>2,015338</b>  | 1242 | 2127 | <b>1684,5</b> |
| ERI1      | 1,399063 | 2,6322   | <b>2,0156315</b> | 1604 | 2413 | <b>2008,5</b> |
| EPHB2     | 1,773785 | 2,259163 | <b>2,016474</b>  | 481  | 1360 | <b>920,5</b>  |
| C20orf4   | 1,669083 | 2,366379 | <b>2,017731</b>  | 1688 | 1874 | <b>1781</b>   |



|          |          |          |                  |      |      |               |
|----------|----------|----------|------------------|------|------|---------------|
| C21orf7  | 2,159978 | 1,879895 | <b>2,0199365</b> | 1911 | 2247 | <b>2079</b>   |
| AMBRA1   | 1,136546 | 2,91143  | <b>2,023988</b>  | 1710 | 2351 | <b>2030,5</b> |
| VAV2     | 1,507942 | 2,540657 | <b>2,0242995</b> | 1439 | 1582 | <b>1510,5</b> |
| CD80     | 2,267519 | 1,782293 | <b>2,024906</b>  | 1967 | 2396 | <b>2181,5</b> |
| PDXK     | 2,098935 | 1,953638 | <b>2,0262865</b> | 1548 | 2527 | <b>2037,5</b> |
| CCDC89   | 1,474918 | 2,580114 | <b>2,027516</b>  | 1658 | 1767 | <b>1712,5</b> |
| HBS1L    | 2,227237 | 1,828791 | <b>2,028014</b>  | 1909 | 2583 | <b>2246</b>   |
| ZNF169   | 1,86072  | 2,198473 | <b>2,0295965</b> | 1393 | 1831 | <b>1612</b>   |
| OR5F1    | 2,030732 | NaN      | <b>2,030732</b>  | 1477 | NaN  | <b>1477</b>   |
| SF3B3    | 2,649731 | 1,420659 | <b>2,035195</b>  | 505  | 1059 | <b>782</b>    |
| KIF14    | NaN      | 2,035261 | <b>2,035261</b>  | NaN  | 2584 | <b>2584</b>   |
| C4orf33  | 2,134986 | 1,941925 | <b>2,0384555</b> | 1896 | 1909 | <b>1902,5</b> |
| NARF     | 1,65749  | 2,424894 | <b>2,041192</b>  | 1768 | 1873 | <b>1820,5</b> |
| OR1G1    | 2,047252 | NaN      | <b>2,047252</b>  | 2024 | NaN  | <b>2024</b>   |
| GIMAP6   | 2,047765 | NaN      | <b>2,047765</b>  | 2063 | NaN  | <b>2063</b>   |
| UTY      | 1,529869 | 2,568751 | <b>2,04931</b>   | 2267 | 3182 | <b>2724,5</b> |
| FAM49B   | 2,054894 | NaN      | <b>2,054894</b>  | 1644 | NaN  | <b>1644</b>   |
| MTX1     | 0,538601 | 3,575515 | <b>2,057058</b>  | 701  | 1174 | <b>937,5</b>  |
| PCSK9    | 1,323578 | 2,79213  | <b>2,057854</b>  | 1510 | 1878 | <b>1694</b>   |
| GOLGA4   | 2,059416 | NaN      | <b>2,059416</b>  | 1419 | NaN  | <b>1419</b>   |
| HAGH     | 1,00743  | 3,114796 | <b>2,061113</b>  | 988  | 2297 | <b>1642,5</b> |
| HNRNPR   | 2,068981 | NaN      | <b>2,068981</b>  | 2157 | NaN  | <b>2157</b>   |
| MED13    | 1,213211 | 2,925323 | <b>2,069267</b>  | 1870 | 3045 | <b>2457,5</b> |
| C12orf42 | 2,145288 | 1,994916 | <b>2,070102</b>  | 1606 | 2141 | <b>1873,5</b> |
| MCAM     | 1,676801 | 2,463742 | <b>2,0702715</b> | 1820 | 2331 | <b>2075,5</b> |
| IL2RA    | 2,140372 | 2,003167 | <b>2,0717695</b> | 1710 | 1798 | <b>1754</b>   |
| WIPF1    | 0,964591 | 3,180972 | <b>2,0727815</b> | 1208 | 1953 | <b>1580,5</b> |
| CEBPD    | 2,073739 | NaN      | <b>2,073739</b>  | 1057 | NaN  | <b>1057</b>   |
| RPS14    | 2,074839 | NaN      | <b>2,074839</b>  | 1097 | NaN  | <b>1097</b>   |
| GPR132   | 2,075403 | NaN      | <b>2,075403</b>  | 1102 | NaN  | <b>1102</b>   |
| TBC1D2B  | 2,076157 | NaN      | <b>2,076157</b>  | 1826 | NaN  | <b>1826</b>   |
| ARHGAP36 | 1,843689 | 2,311104 | <b>2,0773965</b> | 675  | 816  | <b>745,5</b>  |
| REP15    | 2,0831   | NaN      | <b>2,0831</b>    | 1847 | NaN  | <b>1847</b>   |
| TNFRSF4  | 0,794429 | 3,377421 | <b>2,085925</b>  | 1809 | 2765 | <b>2287</b>   |

|          |          |          |                  |      |      |               |
|----------|----------|----------|------------------|------|------|---------------|
| ANLN     | 1,677396 | 2,498104 | <b>2,08775</b>   | 691  | 894  | <b>792,5</b>  |
| CCDC148  | 1,819149 | 2,360085 | <b>2,089617</b>  | 1828 | 2867 | <b>2347,5</b> |
| KHDC1L   | 2,679009 | 1,502697 | <b>2,090853</b>  | 2057 | 2222 | <b>2139,5</b> |
| SLC35E1  | 2,354453 | 1,83047  | <b>2,0924615</b> | 1740 | 2172 | <b>1956</b>   |
| FBN1     | 2,093474 | NaN      | <b>2,093474</b>  | 1977 | NaN  | <b>1977</b>   |
| GRM1     | 2,094112 | NaN      | <b>2,094112</b>  | 1671 | NaN  | <b>1671</b>   |
| ZNF304   | 1,746397 | 2,449322 | <b>2,0978595</b> | 1566 | 1842 | <b>1704</b>   |
| PPP1R8   | 1,585343 | 2,614349 | <b>2,099846</b>  | 2019 | 2656 | <b>2337,5</b> |
| C19orf46 | 2,100533 | NaN      | <b>2,100533</b>  | 1377 | NaN  | <b>1377</b>   |
| CRNKL1   | 1,079806 | 3,126258 | <b>2,103032</b>  | 696  | 974  | <b>835</b>    |
| ZFP82    | 2,100196 | 2,108835 | <b>2,1045155</b> | 1715 | 2308 | <b>2011,5</b> |
| ZNF167   | 2,579686 | 1,633446 | <b>2,106566</b>  | 976  | 1897 | <b>1436,5</b> |
| B3GNT6   | 1,879112 | 2,340079 | <b>2,1095955</b> | 1489 | 2151 | <b>1820</b>   |
| MT1A     | 2,115235 | NaN      | <b>2,115235</b>  | 1569 | NaN  | <b>1569</b>   |
| ENTPD5   | 1,198179 | 3,041568 | <b>2,1198735</b> | 1484 | 1563 | <b>1523,5</b> |
| TRIP12   | 2,548782 | 1,697719 | <b>2,1232505</b> | 1816 | 2454 | <b>2135</b>   |
| ANKZF1   | 1,914532 | 2,332208 | <b>2,12337</b>   | 1711 | 1758 | <b>1734,5</b> |
| INTS12   | 2,215041 | 2,032919 | <b>2,12398</b>   | 881  | 2225 | <b>1553</b>   |
| WDR76    | 2,128295 | NaN      | <b>2,128295</b>  | 1732 | NaN  | <b>1732</b>   |
| SEC16B   | 2,141454 | NaN      | <b>2,141454</b>  | 1499 | NaN  | <b>1499</b>   |
| FOXL1    | 2,366289 | 1,922779 | <b>2,144534</b>  | 1068 | 1768 | <b>1418</b>   |
| RNF168   | 3,144458 | 1,150219 | <b>2,1473385</b> | 1507 | 2431 | <b>1969</b>   |
| WDR46    | 2,148184 | NaN      | <b>2,148184</b>  | 1437 | NaN  | <b>1437</b>   |
| RUNDC3B  | 2,154183 | NaN      | <b>2,154183</b>  | 1615 | NaN  | <b>1615</b>   |
| OR4N5    | 2,351302 | 1,964567 | <b>2,1579345</b> | 1898 | 2129 | <b>2013,5</b> |
| SRP54    | 1,889895 | 2,445305 | <b>2,1676</b>    | 1187 | 1404 | <b>1295,5</b> |
| FASTKD2  | 1,815055 | 2,52829  | <b>2,1716725</b> | 1748 | 2093 | <b>1920,5</b> |
| STH      | 2,578109 | 1,766525 | <b>2,172317</b>  | 1288 | 1741 | <b>1514,5</b> |
| PDS5A    | 2,17279  | NaN      | <b>2,17279</b>   | 1354 | NaN  | <b>1354</b>   |
| DPYD     | 2,189364 | 2,172594 | <b>2,180979</b>  | 1591 | 2208 | <b>1899,5</b> |
| ARL13B   | 2,181317 | NaN      | <b>2,181317</b>  | 1675 | NaN  | <b>1675</b>   |
| CFLAR    | 2,566035 | 1,805847 | <b>2,185941</b>  | 1499 | 2125 | <b>1812</b>   |
| PDS52    | 1,529529 | 2,845803 | <b>2,187666</b>  | 1349 | 1972 | <b>1660,5</b> |
| AFAP1L1  | 1,160716 | 3,223887 | <b>2,1923015</b> | 1274 | 1736 | <b>1505</b>   |

|          |          |          |                  |      |      |               |
|----------|----------|----------|------------------|------|------|---------------|
| HPD      | 0,413988 | 3,973543 | <b>2,1937655</b> | 1575 | 2163 | <b>1869</b>   |
| GRIK3    | 1,547898 | 2,840609 | <b>2,1942535</b> | 2046 | 2703 | <b>2374,5</b> |
| PPP2R4   | 1,412332 | 2,988101 | <b>2,2002165</b> | 1745 | 2577 | <b>2161</b>   |
| OR5AU1   | 1,461229 | 2,944986 | <b>2,2031075</b> | 1611 | 1905 | <b>1758</b>   |
| ACOT11   | 2,479278 | 1,928816 | <b>2,204047</b>  | 1571 | 1743 | <b>1657</b>   |
| SLAMF1   | 1,950986 | 2,464438 | <b>2,207712</b>  | 2066 | 2163 | <b>2114,5</b> |
| DYSFIP1  | 2,209974 | NaN      | <b>2,209974</b>  | 1101 | NaN  | <b>1101</b>   |
| OVOL2    | 2,210241 | NaN      | <b>2,210241</b>  | 1230 | NaN  | <b>1230</b>   |
| PRDM4    | 3,612698 | 0,810094 | <b>2,211396</b>  | 1493 | 1845 | <b>1669</b>   |
| SEPN1    | 2,679656 | 1,748861 | <b>2,2142585</b> | 1192 | 1500 | <b>1346</b>   |
| POLD1    | NaN      | 2,220448 | <b>2,220448</b>  | NaN  | 2290 | <b>2290</b>   |
| ACCN3    | 1,952859 | 2,496817 | <b>2,224838</b>  | 2118 | 2527 | <b>2322,5</b> |
| CXorf61  | 2,225544 | NaN      | <b>2,225544</b>  | 1475 | NaN  | <b>1475</b>   |
| FBXL19   | 1,722073 | 2,733127 | <b>2,2276</b>    | 1018 | 2107 | <b>1562,5</b> |
| OR4X1    | 1,823319 | 2,647657 | <b>2,235488</b>  | 1395 | 1899 | <b>1647</b>   |
| CLLU1OS  | 2,600989 | 1,87501  | <b>2,2379995</b> | 1226 | 1843 | <b>1534,5</b> |
| LCP1     | 1,31409  | 3,166964 | <b>2,240527</b>  | 1125 | 1648 | <b>1386,5</b> |
| SEC61B   | 2,241135 | NaN      | <b>2,241135</b>  | 1547 | NaN  | <b>1547</b>   |
| USF2     | 1,752094 | 2,732264 | <b>2,242179</b>  | 973  | 1538 | <b>1255,5</b> |
| PRSS35   | 3,643533 | 0,856048 | <b>2,2497905</b> | 1927 | 2639 | <b>2283</b>   |
| CHIC2    | 2,533148 | 1,968067 | <b>2,2506075</b> | 1476 | 2282 | <b>1879</b>   |
| ZNF134   | 1,300188 | 3,201723 | <b>2,2509555</b> | 1446 | 2027 | <b>1736,5</b> |
| KIF26A   | 1,914994 | 2,590197 | <b>2,2525955</b> | 1563 | 1472 | <b>1517,5</b> |
| MKL2     | 2,035567 | 2,489546 | <b>2,2625565</b> | 1992 | 2076 | <b>2034</b>   |
| SERBP1   | 1,543781 | 2,995813 | <b>2,269797</b>  | 1358 | 1524 | <b>1441</b>   |
| C22orf36 | 2,554832 | 1,989624 | <b>2,272228</b>  | 1883 | 1919 | <b>1901</b>   |
| GALNTL2  | NaN      | 2,278646 | <b>2,278646</b>  | NaN  | 2427 | <b>2427</b>   |
| UBE2O    | 1,999049 | 2,567918 | <b>2,2834835</b> | 2007 | 2909 | <b>2458</b>   |
| NUP210L  | 2,298586 | NaN      | <b>2,298586</b>  | 1644 | NaN  | <b>1644</b>   |
| PRR18    | 1,719398 | 2,878196 | <b>2,298797</b>  | 1738 | 2287 | <b>2012,5</b> |
| SCAMP4   | 2,306581 | NaN      | <b>2,306581</b>  | 1308 | NaN  | <b>1308</b>   |
| SLC6A14  | 1,932985 | 2,68765  | <b>2,3103175</b> | 1813 | 3090 | <b>2451,5</b> |
| P2RY6    | 2,313705 | NaN      | <b>2,313705</b>  | 1944 | NaN  | <b>1944</b>   |
| C3orf75  | 2,444895 | 2,185599 | <b>2,315247</b>  | 1712 | 2315 | <b>2013,5</b> |

|          |          |          |                  |      |      |               |
|----------|----------|----------|------------------|------|------|---------------|
| XPNPEP2  | 2,386651 | 2,246447 | <b>2,316549</b>  | 1805 | 1981 | <b>1893</b>   |
| RACGAP1  | 2,318614 | NaN      | <b>2,318614</b>  | 1293 | NaN  | <b>1293</b>   |
| TWIST1   | 1,719147 | 2,930987 | <b>2,325067</b>  | 1721 | 2736 | <b>2228,5</b> |
| ZEB1     | 0,091037 | 4,572802 | <b>2,3319195</b> | 2051 | 2133 | <b>2092</b>   |
| ZNF628   | 2,334669 | NaN      | <b>2,334669</b>  | 1466 | NaN  | <b>1466</b>   |
| KIAA0649 | 1,65766  | 3,018528 | <b>2,338094</b>  | 1743 | 3006 | <b>2374,5</b> |
| SDC2     | 1,760773 | 2,92026  | <b>2,3405165</b> | 1349 | 1771 | <b>1560</b>   |
| GPR26    | 2,345682 | NaN      | <b>2,345682</b>  | 1484 | NaN  | <b>1484</b>   |
| CHRM5    | 2,346533 | NaN      | <b>2,346533</b>  | 1803 | NaN  | <b>1803</b>   |
| METTL15  | 2,686697 | 2,010706 | <b>2,3487015</b> | 1640 | 2374 | <b>2007</b>   |
| OR4A15   | 2,353255 | NaN      | <b>2,353255</b>  | 1506 | NaN  | <b>1506</b>   |
| ADSSL1   | 2,564163 | 2,148054 | <b>2,3561085</b> | 1776 | 1730 | <b>1753</b>   |
| AP1S3    | 2,356682 | NaN      | <b>2,356682</b>  | 1906 | NaN  | <b>1906</b>   |
| AMIGO1   | 2,358543 | NaN      | <b>2,358543</b>  | 1541 | NaN  | <b>1541</b>   |
| GRM7     | 2,360852 | NaN      | <b>2,360852</b>  | 1645 | NaN  | <b>1645</b>   |
| OXER1    | 2,37082  | NaN      | <b>2,37082</b>   | 1291 | NaN  | <b>1291</b>   |
| NECAB2   | 2,41526  | 2,332588 | <b>2,373924</b>  | 1415 | 2252 | <b>1833,5</b> |
| LRTOMT   | 1,954285 | 2,797742 | <b>2,3760135</b> | 1524 | 1211 | <b>1367,5</b> |
| LYPD6    | 2,379655 | NaN      | <b>2,379655</b>  | 1868 | NaN  | <b>1868</b>   |
| MTIF2    | 0,708263 | 4,051276 | <b>2,3797695</b> | 1669 | 2363 | <b>2016</b>   |
| POF1B    | 2,380983 | NaN      | <b>2,380983</b>  | 1207 | NaN  | <b>1207</b>   |
| LSR      | NaN      | 2,382943 | <b>2,382943</b>  | NaN  | 2828 | <b>2828</b>   |
| KRT13    | 2,383513 | NaN      | <b>2,383513</b>  | 1238 | NaN  | <b>1238</b>   |
| ANKK1    | 2,614822 | 2,152224 | <b>2,383523</b>  | 1321 | 1923 | <b>1622</b>   |
| IQSEC1   | 2,118133 | 2,651309 | <b>2,384721</b>  | 1591 | 1390 | <b>1490,5</b> |
| GRP      | 2,386979 | NaN      | <b>2,386979</b>  | 1418 | NaN  | <b>1418</b>   |
| TYROBP   | 1,545769 | 3,230147 | <b>2,387958</b>  | 1644 | 2539 | <b>2091,5</b> |
| NUMB     | 3,225384 | 1,56306  | <b>2,394222</b>  | 1774 | 2657 | <b>2215,5</b> |
| ATOH1    | 2,229796 | 2,561448 | <b>2,395622</b>  | 1609 | 1738 | <b>1673,5</b> |
| UBE3C    | 2,076316 | 2,721201 | <b>2,3987585</b> | 2335 | 2557 | <b>2446</b>   |
| TUBG2    | 0,465845 | 4,333797 | <b>2,399821</b>  | 1815 | 2278 | <b>2046,5</b> |
| NAA20    | 1,920724 | 2,882872 | <b>2,401798</b>  | 1940 | 1972 | <b>1956</b>   |
| ERG      | 1,614479 | 3,194494 | <b>2,4044865</b> | 2151 | 2610 | <b>2380,5</b> |
| BRF2     | 2,134818 | 2,686179 | <b>2,4104985</b> | 1674 | 2040 | <b>1857</b>   |

|          |          |          |                  |      |      |               |
|----------|----------|----------|------------------|------|------|---------------|
| STARD3   | 2,412879 | NaN      | <b>2,412879</b>  | 1356 | NaN  | <b>1356</b>   |
| STAT3    | 2,845399 | 1,997514 | <b>2,4214565</b> | 1791 | 3110 | <b>2450,5</b> |
| EDN2     | 1,536421 | 3,323184 | <b>2,4298025</b> | 1230 | 1928 | <b>1579</b>   |
| SCN10A   | 2,093792 | 2,791533 | <b>2,4426625</b> | 2261 | 2857 | <b>2559</b>   |
| IFI16    | 2,133443 | 2,752388 | <b>2,4429155</b> | 1574 | 1751 | <b>1662,5</b> |
| OR11L1   | 2,443183 | NaN      | <b>2,443183</b>  | 1182 | NaN  | <b>1182</b>   |
| UBE2NL   | 1,596839 | 3,293991 | <b>2,445415</b>  | 1494 | 1945 | <b>1719,5</b> |
| SKA1     | 2,463459 | NaN      | <b>2,463459</b>  | 604  | NaN  | <b>604</b>    |
| SCT      | 1,153085 | 3,776958 | <b>2,4650215</b> | 1291 | 1819 | <b>1555</b>   |
| RIPK2    | 2,535528 | 2,394957 | <b>2,4652425</b> | 1736 | 1613 | <b>1674,5</b> |
| ZNF670   | 2,466301 | NaN      | <b>2,466301</b>  | 1378 | NaN  | <b>1378</b>   |
| PIK3C2B  | 3,374568 | 1,581089 | <b>2,4778285</b> | 1515 | 2264 | <b>1889,5</b> |
| TLR10    | 1,972706 | 2,985771 | <b>2,4792385</b> | 1442 | 1764 | <b>1603</b>   |
| SYNGAP1  | 2,039313 | 2,924008 | <b>2,4816605</b> | 1389 | 1710 | <b>1549,5</b> |
| MAPRE3   | 4,529413 | 0,435588 | <b>2,4825005</b> | 1539 | 1850 | <b>1694,5</b> |
| FGF22    | 2,586353 | 2,426618 | <b>2,5064855</b> | 773  | 1421 | <b>1097</b>   |
| AKR1C4   | 1,778395 | 3,240512 | <b>2,5094535</b> | 1350 | 1293 | <b>1321,5</b> |
| SLC15A2  | 1,789592 | 3,232666 | <b>2,511129</b>  | 1424 | 1825 | <b>1624,5</b> |
| EPST11   | 1,995684 | 3,041535 | <b>2,5186095</b> | 1579 | 2179 | <b>1879</b>   |
| TBC1D24  | 2,526621 | NaN      | <b>2,526621</b>  | 1257 | NaN  | <b>1257</b>   |
| PHF5A    | 2,652905 | 2,401647 | <b>2,527276</b>  | 1162 | 1497 | <b>1329,5</b> |
| RGS9     | 1,414028 | 3,642724 | <b>2,528376</b>  | 1736 | 2227 | <b>1981,5</b> |
| KRT31    | 2,539413 | NaN      | <b>2,539413</b>  | 1385 | NaN  | <b>1385</b>   |
| RPS12    | 2,088483 | 3,002257 | <b>2,54537</b>   | 794  | 757  | <b>775,5</b>  |
| FSCN2    | 2,026181 | 3,075816 | <b>2,5509985</b> | 1883 | 2380 | <b>2131,5</b> |
| MDFI     | 2,048051 | 3,068969 | <b>2,55851</b>   | 1634 | 1926 | <b>1780</b>   |
| CHD6     | 1,5625   | 3,557751 | <b>2,5601255</b> | 1339 | 1768 | <b>1553,5</b> |
| DNAH11   | 1,140294 | 3,985978 | <b>2,563136</b>  | 1397 | 1863 | <b>1630</b>   |
| PITRM1   | 3,590894 | 1,638797 | <b>2,6148455</b> | 1588 | 2090 | <b>1839</b>   |
| C22orf29 | 1,725718 | 3,552449 | <b>2,6390835</b> | 2104 | 2417 | <b>2260,5</b> |
| HVCN1    | 2,732303 | 2,553608 | <b>2,6429555</b> | 2344 | 3125 | <b>2734,5</b> |
| KIAA0391 | 2,874752 | 2,437488 | <b>2,65612</b>   | 1657 | 2052 | <b>1854,5</b> |
| SKA3     | 2,839893 | 2,509139 | <b>2,674516</b>  | 574  | 465  | <b>519,5</b>  |
| C9orf43  | 2,682141 | NaN      | <b>2,682141</b>  | 1140 | NaN  | <b>1140</b>   |

|         |          |          |                  |      |      |               |
|---------|----------|----------|------------------|------|------|---------------|
| SLC18A2 | 1,60257  | 3,787409 | <b>2,6949895</b> | 1404 | 1590 | <b>1497</b>   |
| NPVF    | 2,698456 | NaN      | <b>2,698456</b>  | 1821 | NaN  | <b>1821</b>   |
| CCNG2   | 1,702405 | 3,705568 | <b>2,7039865</b> | 1644 | 2140 | <b>1892</b>   |
| CHAF1A  | 1,289356 | 4,152834 | <b>2,721095</b>  | 1136 | 1605 | <b>1370,5</b> |
| ANKMY1  | 2,729564 | NaN      | <b>2,729564</b>  | 1802 | NaN  | <b>1802</b>   |
| MED1    | 4,164303 | 1,299994 | <b>2,7321485</b> | 1092 | 1897 | <b>1494,5</b> |
| OR5A1   | 2,720294 | 2,806909 | <b>2,7636015</b> | 1258 | 1865 | <b>1561,5</b> |
| BIRC6   | 1,76145  | 3,803504 | <b>2,782477</b>  | 1498 | 2450 | <b>1974</b>   |
| HPCAL1  | 2,450564 | 3,155135 | <b>2,8028495</b> | 1647 | 2072 | <b>1859,5</b> |
| ATP13A1 | 3,398478 | 2,227459 | <b>2,8129685</b> | 1029 | 1539 | <b>1284</b>   |
| HCN4    | 2,224991 | 3,411319 | <b>2,818155</b>  | 1849 | 2563 | <b>2206</b>   |
| KIF20B  | NaN      | 2,855122 | <b>2,855122</b>  | NaN  | 2335 | <b>2335</b>   |
| CSNK1A1 | 2,956903 | 2,789465 | <b>2,873184</b>  | 2025 | 2216 | <b>2120,5</b> |
| VSNL1   | 2,882791 | NaN      | <b>2,882791</b>  | 1863 | NaN  | <b>1863</b>   |
| WIPI1   | 2,739913 | 3,157602 | <b>2,9487575</b> | 1722 | 2795 | <b>2258,5</b> |
| SAFB2   | 1,158918 | 4,759017 | <b>2,9589675</b> | 1469 | 2777 | <b>2123</b>   |
| SRSF2   | 2,98636  | 2,953395 | <b>2,9698775</b> | 1121 | 1751 | <b>1436</b>   |
| TLX2    | 2,194081 | 3,876187 | <b>3,035134</b>  | 1157 | 1883 | <b>1520</b>   |
| HPSE    | 4,381966 | 1,700574 | <b>3,04127</b>   | 982  | 1617 | <b>1299,5</b> |
| BEX2    | 1,940668 | 4,163635 | <b>3,0521515</b> | 1406 | 2135 | <b>1770,5</b> |
| ING4    | 3,067638 | NaN      | <b>3,067638</b>  | 1450 | NaN  | <b>1450</b>   |
| CD1B    | 3,443671 | 2,702269 | <b>3,07297</b>   | 1433 | 1786 | <b>1609,5</b> |
| OR9A4   | 3,102347 | NaN      | <b>3,102347</b>  | 1562 | NaN  | <b>1562</b>   |
| LYN     | 3,090572 | 3,183641 | <b>3,1371065</b> | 2107 | 2334 | <b>2220,5</b> |
| COMMD10 | 2,894845 | 3,399187 | <b>3,147016</b>  | 1961 | 2213 | <b>2087</b>   |
| AKAP5   | NaN      | 3,183974 | <b>3,183974</b>  | NaN  | 2533 | <b>2533</b>   |
| SMARCC1 | 4,240066 | 2,146679 | <b>3,1933725</b> | 925  | 2022 | <b>1473,5</b> |
| CASD1   | NaN      | 3,231759 | <b>3,231759</b>  | NaN  | 2505 | <b>2505</b>   |
| CETN1   | 3,068954 | 3,413435 | <b>3,2411945</b> | 1542 | 2336 | <b>1939</b>   |
| SIN3B   | 2,726181 | 3,768725 | <b>3,247453</b>  | 1513 | 1708 | <b>1610,5</b> |
| TAL2    | 2,716651 | 3,842518 | <b>3,2795845</b> | 1608 | 1837 | <b>1722,5</b> |
| LMNA    | 2,500444 | 4,143867 | <b>3,3221555</b> | 1920 | 2602 | <b>2261</b>   |
| RNF113B | 3,192002 | 3,481478 | <b>3,33674</b>   | 1256 | 2205 | <b>1730,5</b> |
| C2orf78 | 2,839942 | 4,188532 | <b>3,514237</b>  | 1613 | 2796 | <b>2204,5</b> |

|         |          |          |                  |      |      |               |
|---------|----------|----------|------------------|------|------|---------------|
| RBM6    | 3,08874  | 3,947488 | <b>3,518114</b>  | 1885 | 1997 | <b>1941</b>   |
| ENC1    | 3,492637 | 3,942563 | <b>3,7176</b>    | 1764 | 2283 | <b>2023,5</b> |
| IL10    | 3,406772 | 4,086097 | <b>3,7464345</b> | 1514 | 1795 | <b>1654,5</b> |
| COX15   | 3,527255 | 3,980706 | <b>3,7539805</b> | 1203 | 1765 | <b>1484</b>   |
| NDN     | 2,460076 | 5,127672 | <b>3,793874</b>  | 1476 | 1982 | <b>1729</b>   |
| GALNTL4 | 3,090947 | 5,200205 | <b>4,145576</b>  | 1278 | 2249 | <b>1763,5</b> |
