# Supplementary figures and images for: Genome-Wide siRNA Screen Identifies Complementary Signaling Pathways Involved in Listeria Infection and Reveals Different Actin Nucleation Mechanisms during Listeria Cell Invasion and Actin Comet Tail Formation
Source: PubMed Central journal article supplement — mBio. 2015 May 19;6(3):e00598-15. doi: 10.1128/mBio.00598-15 (PMC4442140; doi:10.1128/mbio.00598-15), 2015-05-19

A

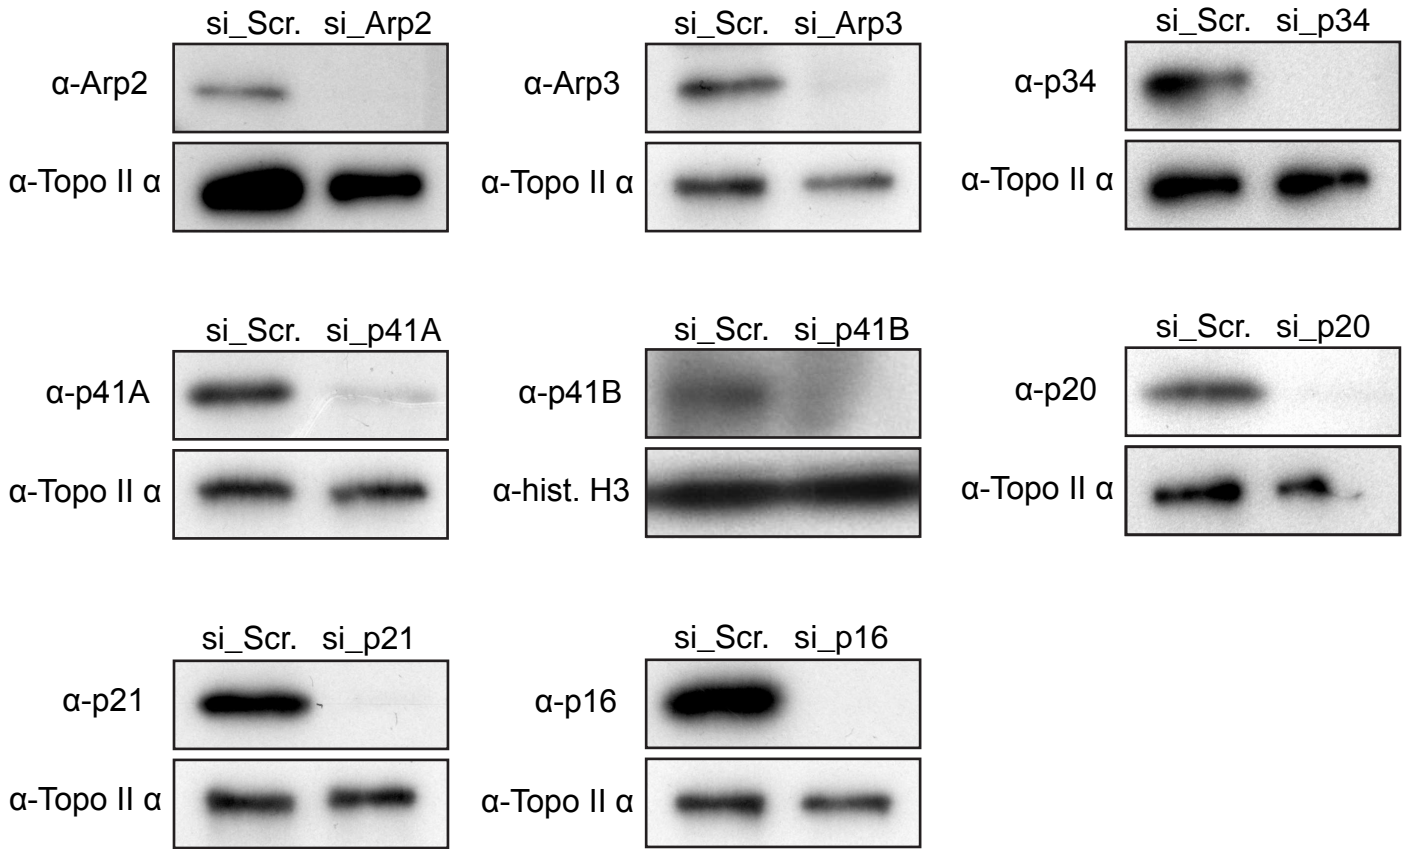

B

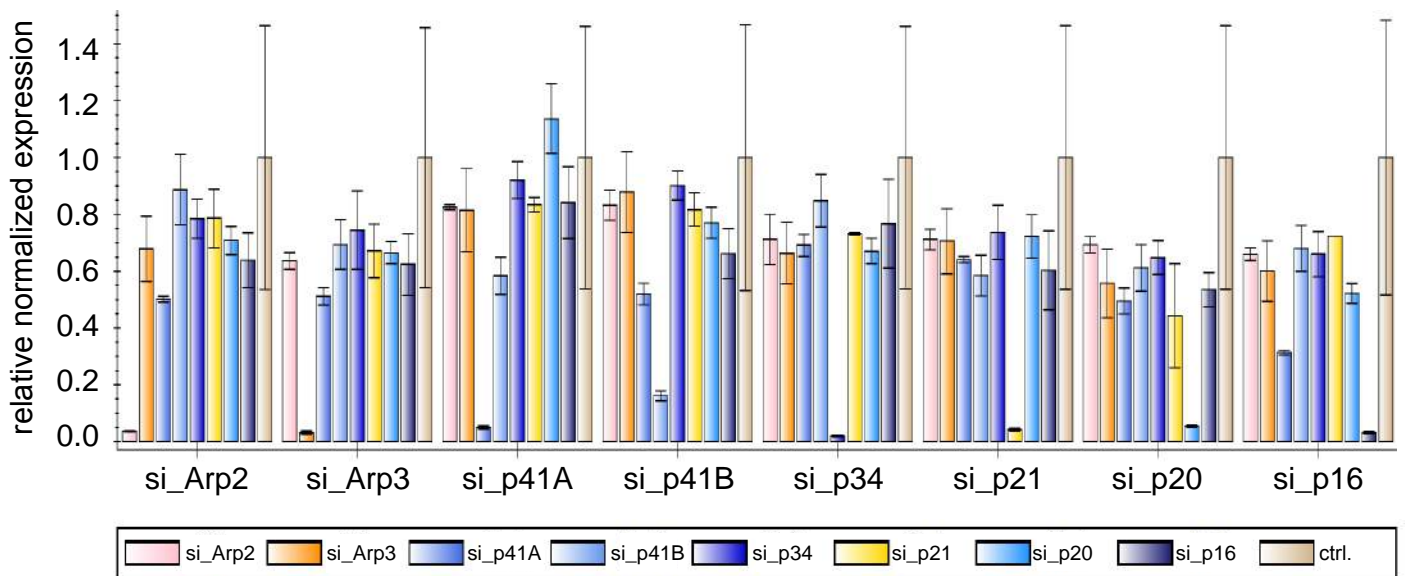

Supplementary Figure 1

Supplement: mbo003152330sf1.pdf [file mbo003152330sf1.pdf]

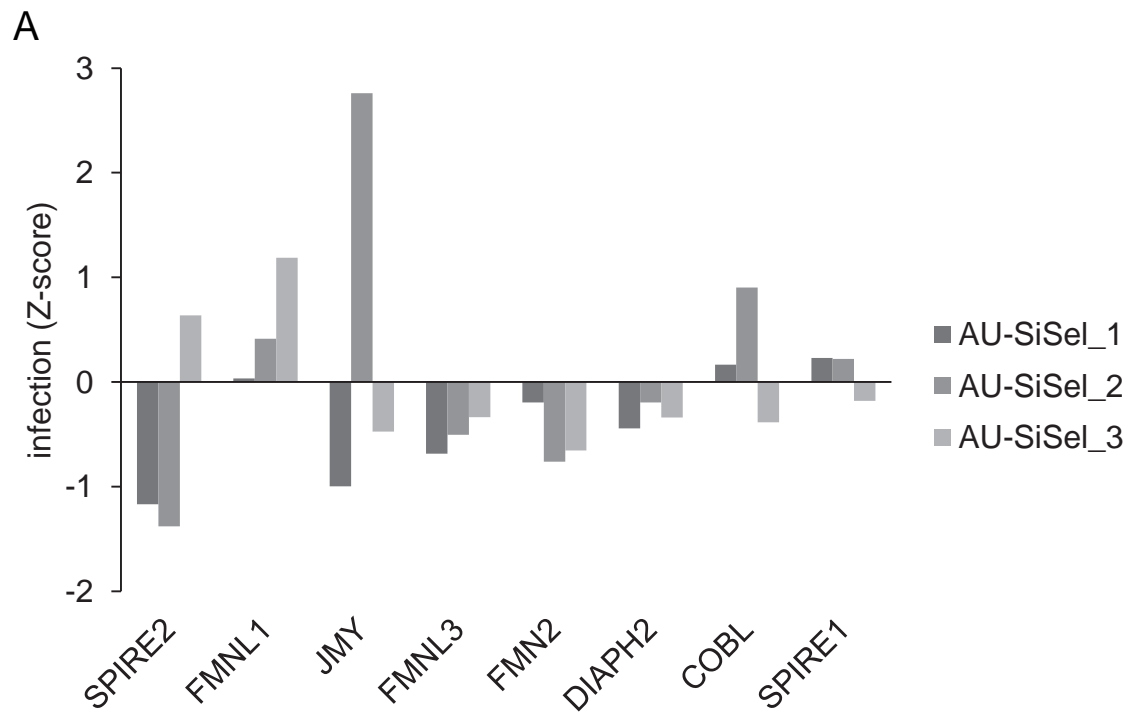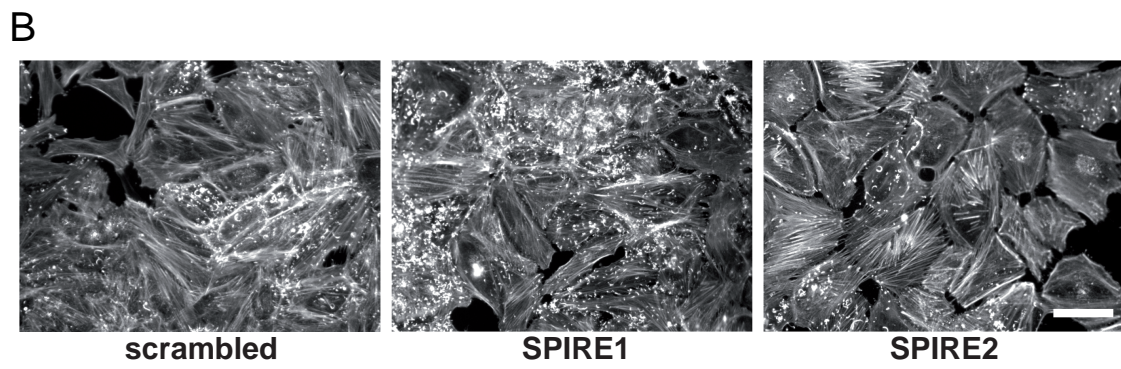

Supplementary Figure 2

Supplement: mbo003152330sf2.pdf [file mbo003152330sf2.pdf]

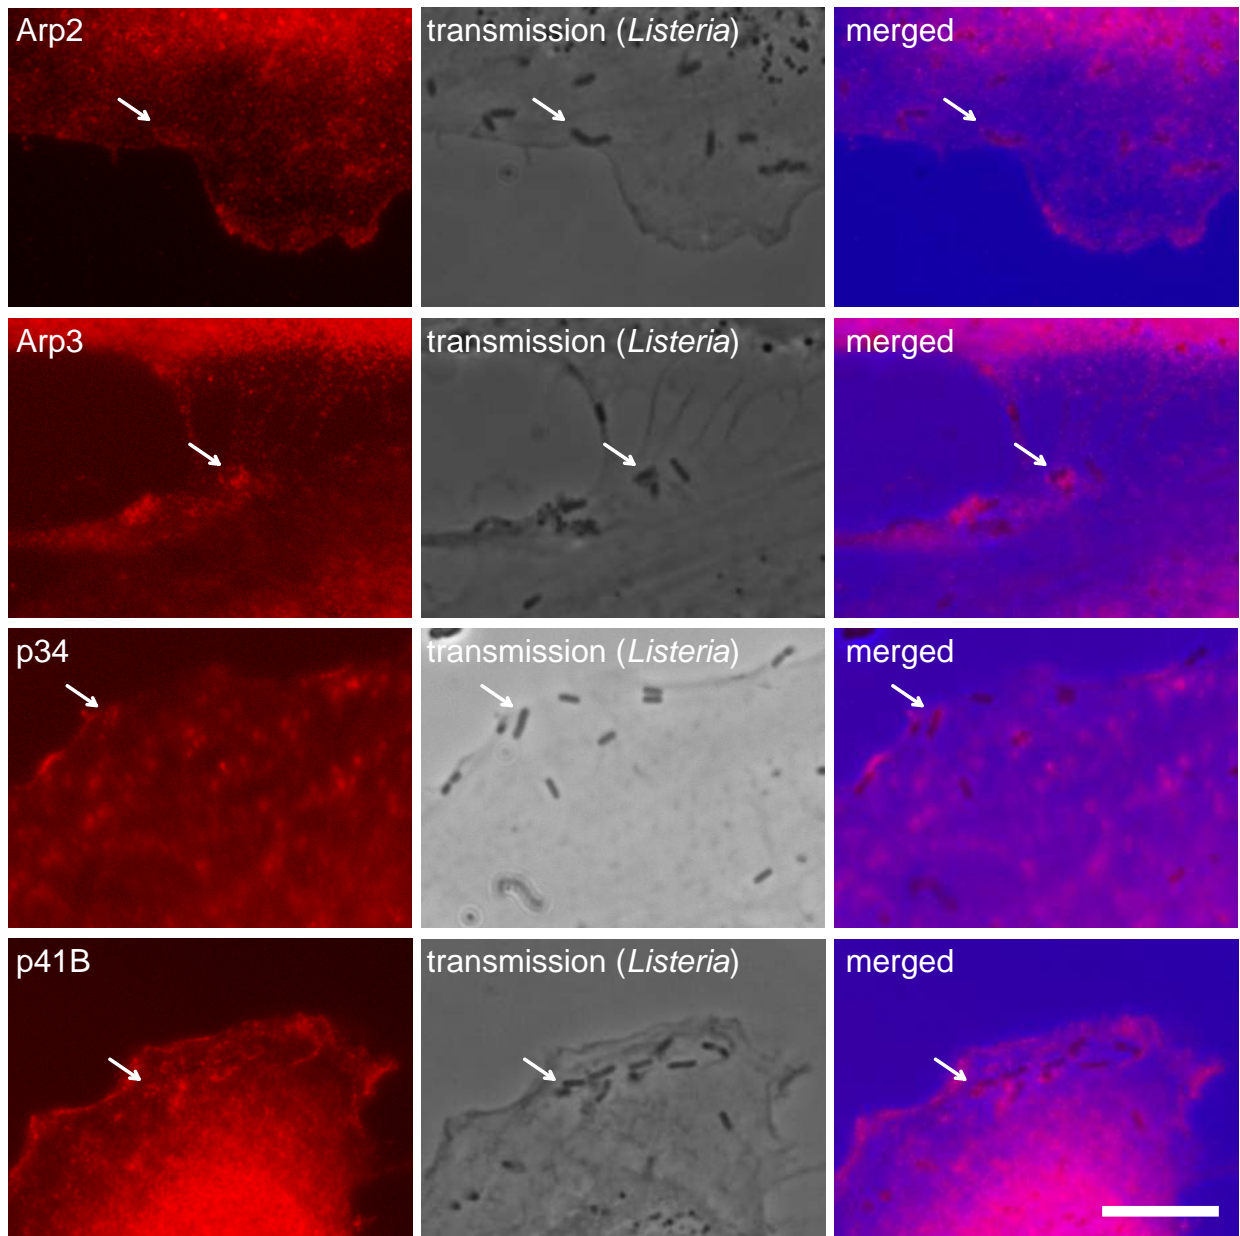

Supplementary Figure 3

Supplement: mbo003152330sf3.pdf [file mbo003152330sf3.pdf]
